# Supplementary material
Source: PubMed Central journal article supplement (PMC5082708)
Supplement: NIHMS747007-supplement-1.pdf [file NIHMS747007-supplement-1.pdf]

## Table of Contents

|                                                                                             |         |
|---------------------------------------------------------------------------------------------|---------|
| I. General Procedures, Materials, and Methods for Synthesis and C-H Activation              | p. S2   |
| II. Synthesis and Characterization of Amine Derivatives                                     | p. S3   |
| III. Optimization and Scope of C-H Arylation of Azabicyclo[3.1.0]hexane <b>3</b>            | p. S13  |
| IV. Scope of Aryl-I for C-H Arylation of Azabicyclo[3.1.0]hexane <b>3</b> (Isolated Yields) | p. S16  |
| V. Optimization and Scope of Alicyclic Amines for C-H Arylation                             | p. S30  |
| VI. Diversification of Varenicline Core via Transannular C-H Arylation                      | p. S40  |
| VII. Other Experiments                                                                      | p. S46  |
| VIII. Determination of the er for <b>4k</b>                                                 | p. S54  |
| IX. X-Ray Crystallographic Analysis of <b>4a,14a</b> , analog of <b>11g, 11b, 11h</b>       | p. S55  |
| X. NMR Spectra                                                                              | p. S140 |

## I. General Procedures, Materials, and Methods for Synthesis and C-H Activation

**Instrumental Information.** NMR spectra were obtained on Varian 400 MHz, Varian 500 MHz, or Varian 700 MHz NMR spectrometers.  $^1\text{H}$  and  $^{13}\text{C}$  NMR chemical shifts are reported in parts per million relative to TMS with the residual solvent peak (most commonly  $\text{CDCl}_3$ ) used as an internal reference ( $\delta$  7.26 for  $^1\text{H}$  NMR and  $\delta$  77.2 for  $^{13}\text{C}$  NMR for  $\text{CDCl}_3$ ).  $^{19}\text{F}$  NMR spectra were referenced to the solvent lock.  $^1\text{H}$  and  $^{19}\text{F}$  multiplicities are reported as follows: singlet (s), doublet (d), triplet (t), quartet (q), and multiplet (m). High resolution mass spectra were obtained at the University of Michigan core facility. Elemental analysis was conducted by Midwest Microlab, Indianapolis, IN. Flash chromatography was conducted on a Biotage Isolera One auto chromatography system using preloaded high performance silica gel columns (10 g, 25 g, 50 g, or 100 g as appropriate). GC-FID was conducted on a Shimadzu CG-17A system. Melting points were obtained on a OptiMelt automated melting point system. IR were obtained on an FT Perkin Elmer instrument via thin film deposition.

**Materials.** All reagents were obtained from a commercial vendor (Aldrich, CombiBlocks, Oakwood, AstaTech, Synthonix, Enamine, Manchester Organics, Carbosynth, Pressure Chemicals, Matrix, SantaCruz Biotech, or Ontario Chemicals) and were used without further purification unless otherwise stated. Reagents were stored under ambient conditions unless otherwise stated. The solvent *tert*-amyl alcohol was stored over activated molecular sieves. Solutions of  $\text{SmI}_2$  were stored and used inside of a nitrogen filled glove box.

**General Methods.** The manipulation of solid reagents was conducted on the benchtop unless otherwise stated. Reactions were conducted under an ambient atmosphere unless otherwise stated. Reaction vessels were sealed with either a septum (flask) or a Teflon lined cap (4 mL or 20 mL vial). Reactions conducted at elevated temperatures were heated on a hot plate using an aluminum block. Temperatures were regulated using an external thermocouple. For reactions that were heated in excess of the ambient boiling point of the solvent (i.e. *tert*-amyl alcohol heated to 140 °C), electrical tape was wrapped around the cap of the sealed vial prior to heating. For TLC analysis,  $R_f$  values are reported based on normal phase silica plates with fluorescent indicator, and sample detection was conducted based on quenched fluorescence at 254 nm.

## II. Synthesis and Characterization of Amine Derivatives

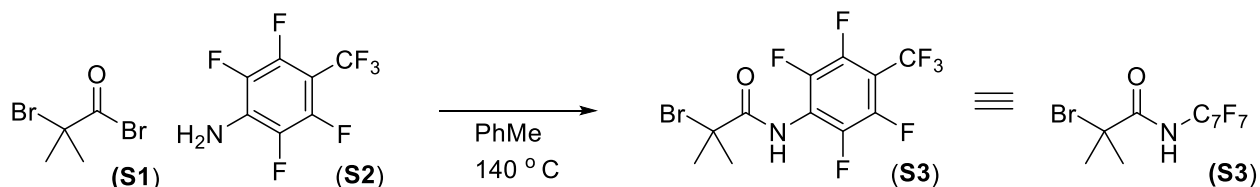

A round bottom flask was charged with 2,3,5,6-tetrafluoro-4-(trifluoromethyl)aniline (7.01 g, 30.1 mmol) and toluene (30 mL). To this solution, 2-bromoisobutyryl bromide (4 mL, 32.3 mmol, 1.1 equiv) was added. The flask was fitted with a reflux condenser topped with a drying tube that was packed with K<sub>2</sub>CO<sub>3</sub> (5 g). The reaction was heated to an external temperature of 140 °C. After 18 h, the reaction mixture was cooled to room temperature and concentrated under vacuum. The solid residue was redissolved in a minimum amount of hexanes and heated to reflux. Upon slow cooling, a crystalline solid precipitated from solution. The solid was collected and rinsed with several small volumes of cold hexanes (3 x 5 mL). The solid was then dried under vacuum to afford product **S3** as white needles (10.9 g, 95% yield).

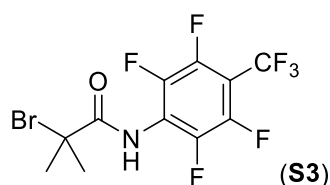

MP 125-126 °C

IR (thin film): 1685 cm<sup>-1</sup>

<sup>1</sup>H NMR (700 MHz, CDCl<sub>3</sub>) δ 8.19 (s, 1H), 2.06 (s, 6H).

<sup>19</sup>F NMR (377 MHz, CDCl<sub>3</sub>) δ -56.0 (t, *J* = 21.7 Hz, 3F), -141.2 (m, 2F), -144.2 (m, 2F).

The carbon resonances corresponding to the perfluoroarene (C<sub>7</sub>F<sub>7</sub>) in this compound appear as a complex series of multiplets between 105 ppm to 155 ppm as a result of <sup>13</sup>C/<sup>19</sup>F coupling. Due to the complexities of the system, the peaks are not listed. <sup>19</sup>F NMR and HRMS were used to confirm the presence of this ring system.

<sup>13</sup>C NMR (176 MHz, CDCl<sub>3</sub>) δ 170.2, 60.7, 32.2.

HRMS (ESI<sup>+</sup>) [M+H]<sup>+</sup> Calcd for C<sub>11</sub>H<sub>8</sub>BrF<sub>7</sub>NO<sup>+</sup>: 381.9677; Found: 381.9668.

*R*<sub>f</sub> = 0.55 in 20% EtOAc in hexanes

### Synthesis of Starting Materials:

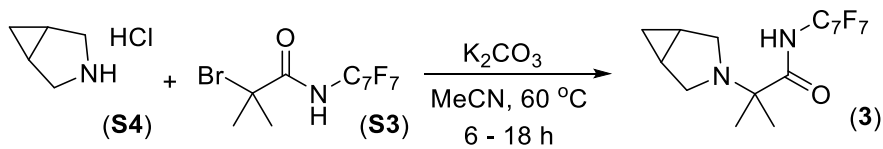

A 20 mL scintillation vial was charged with solid 3-azabicyclo[3.1.0]hexane hydrochloride **S4** (121 mg, 1.01 mmol),  $\alpha$ -bromo propanamide **S3** (430 mg, 1.1 mmol, 1.1 equiv), and  $K_2CO_3$  (442 mg, 3.2 mmol, 3.2 equiv). To the solids, anhydrous acetonitrile (5 mL) was added. The vial was sealed, and the reaction was heated to an external temperature of 60 °C. After 18 h, the reaction was cooled to room temperature, diluted with EtOAc (~5 mL), and filtered through Celite. The filtrate was concentrated under reduced pressure. Final purification via column chromatography (gradient elution from 0% to 20% EtOAc in hexanes) afforded product **3** (315 mg, 81% yield) as a white solid. Other amine derivatives were prepared in an analogous manner by using the appropriate amine starting material. When an amine hydrochloride was used, 3.2 equiv of  $K_2CO_3$  were used. When the amine free base was used, 2 equiv of  $K_2CO_3$  were used. See substrate specific notes below.

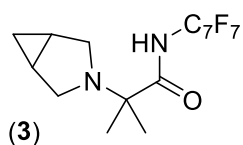

MP 114-116 °C

IR (thin film): 1700  $cm^{-1}$

$^1H$  NMR (700 MHz,  $CDCl_3$ )  $\delta$  9.02 (s, 1H), 2.88 (d,  $J = 8.5$  Hz, 2H), 2.69 (dt,  $J = 8.5, 1.6$  Hz, 2H), 1.43 (m, 2H), 1.31 (s, 6H), 0.63 (q,  $J = 4.2$  Hz, 1H), 0.48 (td,  $J = 7.7, 4.3$  Hz, 1H).

$^{19}F$  NMR (377 MHz,  $CDCl_3$ )  $\delta$  -56.0 (t,  $J = 21.7$  Hz, 3F), -141.2 (m, 2F), -144.2 (m, 2F).

The carbon resonances corresponding to the perfluoroarene ( $C_7F_7$ ) in this compound appear as a complex series of multiplets between 105 ppm to 155 ppm as a result of  $^{13}C/^{19}F$  coupling. Due to the complexities of the system, the peaks are not listed.  $^{19}F$  NMR and HRMS were used to confirm the presence of this ring system.

$^{13}C$  NMR (176 MHz,  $CDCl_3$ )  $\delta$  175.1, 61.1, 47.6, 21.0, 14.5, 6.5.

HRMS (ESI<sup>+</sup>)  $[M+H]^+$  Calcd for  $C_{16}H_{16}F_7N_2O^+$ : 385.1151; Found: 385.1145.

$R_f = 0.60$  in 20% EtOAc in hexanes

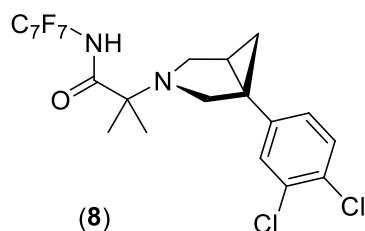

Compound **8** was isolated in 87% yield as a white solid using standard conditions above.

MP 75-77 °C

IR (thin film): 1716 (br)  $cm^{-1}$

$^1H$  NMR (700 MHz,  $CDCl_3$ )  $\delta$  8.93 (s, 1H), 7.34 (d,  $J = 8.3$  Hz, 1H), 7.23 (d,  $J = 2.2$  Hz, 1H), 6.99 (dd,  $J = 8.3, 2.2$  Hz, 1H), 3.22 (d,  $J = 8.5$  Hz, 1H), 3.02 (d,  $J = 8.6$  Hz, 1H), 2.95-2.88



(multiple peaks, 2H), 1.82 (dt,  $J = 7.9, 3.9$  Hz, 1H), 1.41 – 1.38 (multiple peaks, 4H), 1.37 (s, 3H), 0.93 (dd,  $J = 8.0, 4.8$  Hz, 1H).

$^{19}\text{F}$  NMR (377 MHz,  $\text{CDCl}_3$ )  $\delta$  -56.0 (t,  $J = 21.7$  Hz, 3F), -141.0 (dd,  $J = 21.7, 11.7$  Hz, 2F), -144.1 (m, 2F).

The carbon resonances corresponding to the perfluoroarene ( $\text{C}_7\text{F}_7$ ) in this compound appear as a complex series of multiplets between 105 ppm to 155 ppm as a result of  $^{13}\text{C}/^{19}\text{F}$  coupling. Due to the complexities of the system, the peaks are not listed.  $^{19}\text{F}$  NMR and HRMS were used to confirm the presence of this ring system.

$^{13}\text{C}$  NMR (176 MHz,  $\text{CDCl}_3$ )  $\delta$  174.5, 142.3, 132.3, 130.2, 130.0, 128.5, 125.9, 61.3, 51.5, 47.9, 29.3, 23.8, 21.2, 20.7, 16.6.

HRMS (ESI<sup>+</sup>)  $[\text{M}+\text{H}]^+$  Calcd for  $\text{C}_{22}\text{H}_{18}\text{F}_7\text{N}_2\text{O}^+$ : 529.0684; Found: 529.0679.

$R_f = 0.60$  in 20% EtOAc in hexanes

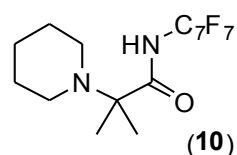

Note: 2 equiv of piperidine and 2 equiv of  $\text{K}_2\text{CO}_3$  were used. Amide **S3** was the limiting reagent. Isolated in 84% yield as a white solid using standard conditions above.

MP 72-74 °C

IR (thin film): 1707 (br)  $\text{cm}^{-1}$

$^1\text{H}$  NMR (700 MHz,  $\text{CDCl}_3$ )  $\delta$  9.50 (br s, 1H), 2.50 (br s, 4H), 1.66 (br s, 4H), 1.51 (br s, 2H), 1.29 (s, 6H).

$^{19}\text{F}$  NMR (377 MHz,  $\text{CDCl}_3$ )  $\delta$  -56.0 (t,  $J = 21.7$  Hz, 3F), -141.2 (m, 2F), -144.2 (m, 2F).

The carbon resonances corresponding to the perfluoroarene ( $\text{C}_7\text{F}_7$ ) in this compound appear as a complex series of multiplets between 105 ppm to 155 ppm as a result of  $^{13}\text{C}/^{19}\text{F}$  coupling. Due to the complexities of the system, the peaks are not listed.  $^{19}\text{F}$  NMR and HRMS were used to confirm the presence of this ring system.

$^{13}\text{C}$  NMR (176 MHz,  $\text{CDCl}_3$ )  $\delta$  175.9, 64.9, 48.0, 26.7, 24.5, 20.5.

HRMS (ESI<sup>+</sup>)  $[\text{M}+\text{H}]^+$  Calcd for  $\text{C}_{16}\text{H}_{18}\text{F}_7\text{N}_2\text{O}^+$ : 387.1307; Found: 387.1304.

$R_f = 0.60$  in 20% EtOAc in hexanes

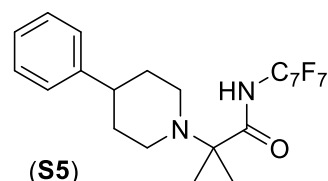

Compound **S5** was isolated in 80% yield as a white solid using the standard conditions.

MP 138-141 °C

IR (thin film): 1717 (br)  $\text{cm}^{-1}$

$^1\text{H}$  NMR (700 MHz,  $\text{CDCl}_3$ )  $\delta$  9.45 (s, 1H), 7.32 (t,  $J = 7.5$  Hz, 2H), 7.25-7.20 (multiple peaks, 3H), 2.99 (d,  $J = 11.2$  Hz, 2H), 2.58 (tt,  $J = 12.4, 3.9$  Hz, 1H), 2.40 (td,  $J = 11.5, 2.1$  Hz, 2H), 1.99 (dt,  $J = 12.7, 2.9$  Hz, 2H), 1.79 (m, 2H), 1.36 (s, 6H).

$^{19}\text{F}$  NMR (471 MHz,  $\text{CDCl}_3$ )  $\delta$  -56.0 (t,  $J = 21.7$  Hz, 3F), -141.0 (m, 2F), -144.1 (m, 2F).

The carbon resonances corresponding to the perfluoroarene ( $\text{C}_7\text{F}_7$ ) in this compound appear as a complex series of multiplets between 105 ppm to 155 ppm as a result of  $^{13}\text{C}/^{19}\text{F}$  coupling. Due to

the complexities of the system, the peaks are not listed.  $^{19}\text{F}$  NMR and HRMS were used to confirm the presence of this ring system.

$^{13}\text{C}$  NMR (176 MHz,  $\text{CDCl}_3$ )  $\delta$  175.7, 145.6, 128.5, 126.7, 126.4, 64.8, 47.8, 42.6, 34.0, 20.5.

HRMS (ESI $^+$ )  $[\text{M}+\text{H}]^+$  Calcd for  $\text{C}_{22}\text{H}_{22}\text{F}_7\text{N}_2\text{O}^+$ : 463.1620; Found: 463.1621.

$R_f = 0.60$  in 20% EtOAc in hexanes

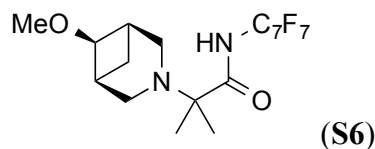

Note: The trifluoroacetate salt of the amine was used as the precursor. Preparative TLC (10% EtOAc in hexanes) was used for isolation of the substrate.

Compound **S6** was isolated in 33% yield as a white solid using the standard conditions.

MP 89-91  $^{\circ}\text{C}$

IR (thin film): 1700  $\text{cm}^{-1}$

$^1\text{H}$  NMR (500 MHz,  $\text{CDCl}_3$ )  $\delta$  9.67 (s, 1H), 3.57 (t,  $J = 5$  Hz, 1H), 3.29 (s, 3H), 3.14-3.06 (multiple peaks, 4H), 2.65 (br s, 2H), 1.59 (d,  $J = 10$  Hz, 1H), 1.50 (m, 1H), 1.43 (s, 6H).

$^{19}\text{F}$  NMR (377 MHz,  $\text{CDCl}_3$ )  $\delta$  -56.1 (t,  $J = 18.9$  Hz, 3F), -141.4 (m, 2F), -143.7 (m, 2F).

The carbon resonances corresponding to the perfluoroarene ( $\text{C}_7\text{F}_7$ ) in this compound appear as a complex series of multiplets between 105 ppm to 155 ppm as a result of  $^{13}\text{C}/^{19}\text{F}$  coupling. Due to the complexities of the system, the peaks are not listed.  $^{19}\text{F}$  NMR and HRMS were used to confirm the presence of this ring system.

$^{13}\text{C}$  NMR (126 MHz,  $\text{CDCl}_3$ )  $\delta$  176.4, 75.3, 63.4, 56.5, 44.7, 37.6, 22.8, 22.5.

HRMS (ESI $^+$ )  $[\text{M}+\text{H}]^+$  Calcd for  $\text{C}_{18}\text{H}_{20}\text{F}_7\text{N}_2\text{O}_2$ : 429.1408 ; Found: 429.1411.

$R_f = 0.27$  in 10% EtOAc in hexanes

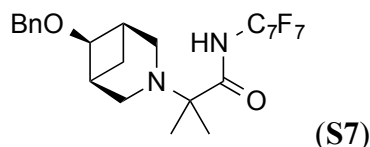

Note: The hydrochloric salt of the amine was used as the precursor.

Compound **S7** was isolated in 51% yield as a white solid using the standard conditions.

MP 111-113  $^{\circ}\text{C}$

IR (thin film): 1693  $\text{cm}^{-1}$

$^1\text{H}$  NMR (700 MHz,  $\text{CDCl}_3$ )  $\delta$  9.60 (br s, 1H), 7.22 (d,  $J = 7$  Hz, 2H), 7.14 (t,  $J = 7$  Hz, 2H), 7.08 (t,  $J = 7$  Hz, 1H), 4.47 (s, 2H), 3.87 (t,  $J = 9.1$  Hz, 1H), 3.25 (d,  $J = 14$  Hz, 2H), 3.15 (d,  $J = 9.1$  Hz, 2H), 2.73 (t,  $J = 4.9$  Hz, 2H), 1.57 (m, 1H), 1.46 (app d,  $J = 9.1$  Hz, 1H), 1.42 (s, 6H).

$^{19}\text{F}$  NMR (377 MHz,  $\text{CDCl}_3$ )  $\delta$  -56.20 (t,  $J = 21.5$  Hz, 3F), -142.31 (m, 2F), -143.57 (m, 2F).

The carbon resonances corresponding to the perfluoroarene ( $\text{C}_7\text{F}_7$ ) in this compound appear as a complex series of multiplets between 105 ppm to 155 ppm as a result of  $^{13}\text{C}/^{19}\text{F}$  coupling. Due to the complexities of the system, the peaks are not listed.  $^{19}\text{F}$  NMR and HRMS were used to confirm the presence of this ring system.

$^{13}\text{C}$  NMR (176 MHz,  $\text{CDCl}_3$ )  $\delta$  176.8, 137.2, 128.2, 128.1, 128.0, 74.5, 72.1, 63.1, 45.7, 38.2, 24.2, 23.2.

HRMS (ESI $^+$ )  $[\text{M}+\text{H}]^+$  Calcd for  $\text{C}_{24}\text{H}_{23}\text{F}_7\text{N}_2\text{O}_2$ : 505.1721; Found: 505.1721.

$R_f = 0.19$  in 10% EtOAc in hexanes

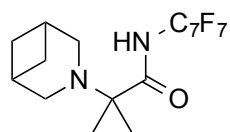

(S8)

Compound **S8** was isolated in 56% yield as a white solid using the standard conditions.

MP 91-93 °C

IR (thin film): 1701  $\text{cm}^{-1}$

$^1\text{H}$  NMR (700 MHz,  $\text{CDCl}_3$ )  $\delta$  9.22 (br s, 1H), 2.95 (s, 4H), 2.41 (tt,  $J = 5.9, 1.6$  Hz, 2H), 2.05 (m, 2H), 1.49 (m, 2H), 1.38 (s, 6H).

$^{19}\text{F}$  NMR (377 MHz,  $\text{CDCl}_3$ )  $\delta$  -56.0 (t,  $J = 21.7$  Hz, 3F), -141.2 (m, 2F), -144.3 (m, 2F).

The carbon resonances corresponding to the perfluoroarene ( $\text{C}_7\text{F}_7$ ) in this compound appear as a complex series of multiplets between 105 ppm to 155 ppm as a result of  $^{13}\text{C}/^{19}\text{F}$  coupling. Due to the complexities of the system, the peaks are not listed.  $^{19}\text{F}$  NMR and HRMS were used to confirm the presence of this ring system.

$^{13}\text{C}$  NMR (176 MHz,  $\text{CDCl}_3$ )  $\delta$  175.5, 63.2, 49.9, 33.2, 32.6, 20.7.

HRMS (ESI<sup>+</sup>)  $[\text{M}+\text{H}]^+$  Calcd for  $\text{C}_{17}\text{H}_{18}\text{F}_7\text{N}_2\text{O}^+$ : 399.1307; Found: 399.1300.

$R_f = 0.60$  in 20% EtOAc in hexanes

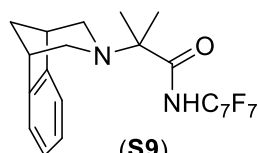

(S9)

Compound **S9** was isolated in 86% yield as a white solid using the standard conditions.

MP 121-123 °C

IR (thin film): 1712  $\text{cm}^{-1}$

$^1\text{H}$  NMR (700 MHz,  $\text{CDCl}_3$ )  $\delta$  7.49 (br s, 1H), 7.16 (dd,  $J = 5.3, 3.2$  Hz, 2H), 7.06 (dd,  $J = 5.3, 3.1$  Hz, 2H), 3.21 (t,  $J = 4.2$  Hz, 2H), 2.70 (m, 2H), 2.69 (d,  $J = 10.4$  Hz, 2H), 2.31 (dt,  $J = 10.3, 3.6$  Hz, 1H), 1.74 (d,  $J = 10.4$  Hz, 1H), 1.20 (s, 6H).

$^{19}\text{F}$  NMR (377 MHz,  $\text{CDCl}_3$ )  $\delta$  -56.0 (t,  $J = 21.8$  Hz, 3F), -141.5 (m, 2F), -143.0 (m, 2F).

The carbon resonances corresponding to the perfluoroarene ( $\text{C}_7\text{F}_7$ ) in this compound appear as a complex series of multiplets between 105 ppm to 155 ppm as a result of  $^{13}\text{C}/^{19}\text{F}$  coupling. Due to the complexities of the system, the peaks are not listed.  $^{19}\text{F}$  NMR and HRMS were used to confirm the presence of this ring system.

$^{13}\text{C}$  NMR (176 MHz,  $\text{CDCl}_3$ )  $\delta$  176.2, 145.5, 126.7, 121.6, 63.7, 50.5, 43.6, 41.0, 21.6.

HRMS (ESI<sup>+</sup>)  $[\text{M}+\text{H}]^+$  Calcd for  $\text{C}_{22}\text{H}_{20}\text{F}_7\text{N}_2\text{O}^+$ : 461.1464; Found: 461.1469.

$R_f = 0.55$  in 20% EtOAc in hexanes

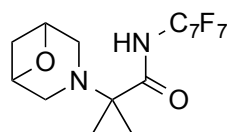

(S10)

Note: The tosylate salt of the amine was used as the precursor.

Compound **S10** was isolated in 59% yield as an oil using the standard conditions.

IR (thin film): 1702 (br)  $\text{cm}^{-1}$

$^1\text{H}$  NMR (700 MHz,  $\text{CDCl}_3$ )  $\delta$  8.97 (s, 1H), 4.58 (m, 2H), 3.12-3.03 (multiple peaks, 3H), 2.96 (dt,  $J = 11.5, 2.0$  Hz, 2H), 2.26 (d,  $J = 8.3$  Hz, 1H), 1.39 (s, 6H).

$^{19}\text{F}$  NMR (377 MHz,  $\text{CDCl}_3$ )  $\delta$  -56.3 (t,  $J = 21.7$  Hz, 3F), -141.4 (m, 2F), -144.5 (m, 2F).

The carbon resonances corresponding to the perfluoroarene ( $\text{C}_7\text{F}_7$ ) in this compound appear as a complex series of multiplets between 105 ppm to 155 ppm as a result of  $^{13}\text{C}/^{19}\text{F}$  coupling. Due to the complexities of the system, the peaks are not listed.  $^{19}\text{F}$  NMR and HRMS were used to confirm the presence of this ring system.

$^{13}\text{C}$  NMR (176 MHz,  $\text{CDCl}_3$ )  $\delta$  174.6, 79.1, 63.3, 48.8, 30.0, 20.6.

HRMS (ESI $^+$ )  $[\text{M}+\text{H}]^+$  Calcd for  $\text{C}_{16}\text{H}_{16}\text{F}_7\text{N}_2\text{O}_2^+$ : 401.1100; Found: 401.1095.

$R_f = 0.30$  in 35% EtOAc in hexanes

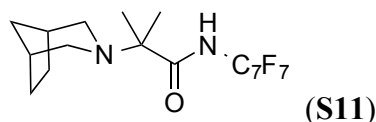

Compound **S11** was isolated in 93% yield as a white solid using standard conditions, except that purification was conducted via column chromatography, followed by recrystallization of the substrate from hot hexanes.

MP 121-123  $^\circ\text{C}$

IR (thin film): 1699  $\text{cm}^{-1}$

$^1\text{H}$  NMR (500 MHz,  $\text{CDCl}_3$ )  $\delta$  9.24 (s, 1H), 2.61 (dd,  $J = 4, 11$  Hz, 2H), 2.37 (d,  $J = 11$  Hz, 2H), 2.23 (br s, 2H), 1.66 (m, 4 H), 1.50 (m, 1H), 1.39 (d,  $J = 11$  Hz, 1H), 1.26 (s, 6H).

$^{19}\text{F}$  NMR (471 MHz,  $\text{CDCl}_3$ ): -56.3 (t,  $J = 23.6$  Hz, 3F), -141.7 (m, 2F), -143.7 (m, 2F)

The carbon resonances corresponding to the perfluoroarene ( $\text{C}_7\text{F}_7$ ) in this compound appear as a complex series of multiplets between 105 ppm to 155 ppm as a result of  $^{13}\text{C}/^{19}\text{F}$  coupling. Due to the complexities of the system, the peaks are not listed.  $^{19}\text{F}$  NMR and HRMS were used to confirm the presence of this ring system.

$^{13}\text{C}$  NMR (176 MHz,  $\text{CDCl}_3$ )  $\delta$  176.0, 64.2, 53.3, 37.5, 35.2, 28.2, 20.8.

HRMS (ESI $^+$ )  $[\text{M}+\text{H}]^+$  Calcd for  $\text{C}_{18}\text{H}_{20}\text{F}_7\text{N}_2\text{O}$ : 413.1458 ; Found: 413.1460.

$R_f = 0.29$  in 5% EtOAc in hexanes

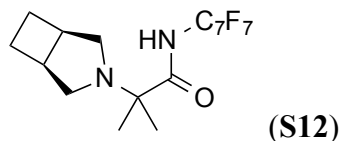

Note: The hydrochloric salt of the amine was used as the precursor.

Compound **S12** was isolated in 40% yield as a white solid using the standard conditions.

MP 84-86  $^\circ\text{C}$

IR (thin film): 1700  $\text{cm}^{-1}$

$^1\text{H}$  NMR (500 MHz,  $\text{CDCl}_3$ )  $\delta$  9.64 (br s, 1H), 2.86 (m, 2H), 2.75 (d,  $J = 9.5$  Hz, 2H), 2.46 (dd,  $J = 9.5, 5.5$  Hz, 2H), 2.25 (s,  $J = 6.5$  Hz, 2H), 1.72 (m, 2H), 1.39 (s, 6H).

$^{19}\text{F}$  NMR (471 MHz,  $\text{CDCl}_3$ )  $\delta$  -56.0 (t,  $J = 23.6$  Hz, 3F), -141.2 (m, 2F), -143.7 (m, 2F).

The carbon resonances corresponding to the perfluoroarene ( $\text{C}_7\text{F}_7$ ) in this compound appear as a complex series of multiplets between 105 ppm to 155 ppm as a result of  $^{13}\text{C}/^{19}\text{F}$  coupling. Due to the complexities of the system, the peaks are not listed.  $^{19}\text{F}$  NMR and HRMS were used to confirm the presence of this ring system.

$^{13}\text{C}$  NMR (126 MHz,  $\text{CDCl}_3$ )  $\delta$  175.7, 61.7, 53.7, 36.5, 24.4, 21.2.

HRMS (ESI $^+$ )  $[\text{M}+\text{H}]^+$  Calcd for  $\text{C}_{17}\text{H}_{18}\text{F}_7\text{N}_2\text{O}$ : 399.1302; Found: 399.1299.

$R_f$  = 0.33 in 10% EtOAc in hexanes

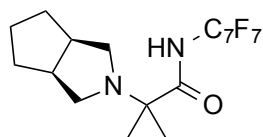

(S13)

Note: The hydrochloric salt of the amine was used as the precursor.

Compound **S13** was isolated in 45% yield as a white solid using the standard conditions.

MP 68-70  $^{\circ}\text{C}$

IR (thin film): 1698  $\text{cm}^{-1}$

$^1\text{H}$  NMR (700 MHz,  $\text{CDCl}_3$ )  $\delta$  9.38 (br s, 1H), 2.75 (app t,  $J$  = 7.7 Hz, 2H), 2.58 (m, 2H), 2.37 (app d,  $J$  = 7.7 Hz, 2H), 1.81 (app sextet,  $J$  = 7 Hz, 2H), 1.65 (septet,  $J$  = 7 Hz, 1H), 1.52 (septet,  $J$  = 7 Hz, 1H), 1.39 (m, 2H), 1.32 (s, 6H).

$^{19}\text{F}$  NMR (377 MHz,  $\text{CDCl}_3$ )  $\delta$  -56.04 (t,  $J$  = 21.9 Hz, 3F), -141.24 (m, 2F), -143.95 (m, 2F).

The carbon resonances corresponding to the perfluoroarene ( $\text{C}_7\text{F}_7$ ) in this compound appear as a complex series of multiplets between 105 ppm to 155 ppm as a result of  $^{13}\text{C}/^{19}\text{F}$  coupling. Due to the complexities of the system, the peaks are not listed.  $^{19}\text{F}$  NMR and HRMS were used to confirm the presence of this ring system.

$^{13}\text{C}$  NMR (176 MHz,  $\text{CDCl}_3$ )  $\delta$  175.5, 61.7, 54.0, 41.8, 33.6, 26.8, 20.9.

HRMS (ESI $^+$ )  $[\text{M}+\text{H}]^+$  Calcd for  $\text{C}_{18}\text{H}_{19}\text{F}_7\text{N}_2\text{O}$ : 413.1458; Found: 413.1458.

$R_f$  = 0.23 in 10% EtOAc in hexanes

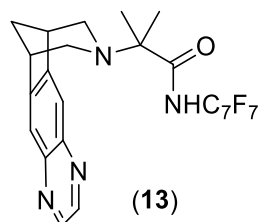

(13)

Note: the tartrate salt of the amine was used as the precursor

Compound **13** was isolated in 81% yield as a white solid using standard conditions.

MP 153-155  $^{\circ}\text{C}$

IR (thin film): 1718  $\text{cm}^{-1}$

$^1\text{H}$  NMR (700 MHz,  $\text{CDCl}_3$ )  $\delta$  8.67 (s, 2H), 7.76 (s, 2H), 7.37 (s, 1H), 3.46 (t,  $J$  = 4.5 Hz, 2H), 2.96 (dd,  $J$  = 11.0, 4.3, Hz, 2H), 2.83 (d,  $J$  = 10.8 Hz, 2H), 2.38 (dt,  $J$  = 11.0, 4.5, Hz, 1H), 1.92 (d,  $J$  = 10.9 Hz, 1H), 1.16 (s, 6H).

$^{19}\text{F}$  NMR (377 MHz,  $\text{CDCl}_3$ )  $\delta$  -56.1 (t,  $J$  = 21.7 Hz, 3F), -141.4 (m, 2F), -144.3 (m, 2F).

The carbon resonances corresponding to the perfluoroarene ( $\text{C}_7\text{F}_7$ ) in this compound appear as a complex series of multiplets between 105 ppm to 155 ppm as a result of  $^{13}\text{C}/^{19}\text{F}$  coupling. Due to the complexities of the system, the peaks are not listed.  $^{19}\text{F}$  NMR and HRMS were used to confirm the presence of this ring system.

$^{13}\text{C}$  NMR (176 MHz,  $\text{CDCl}_3$ )  $\delta$  174.9, 149.6, 143.9, 143.1, 120.9, 63.8, 51.7, 42.8, 40.9, 21.3.

HRMS (ESI $^+$ )  $[\text{M}+\text{H}]^+$  Calcd for  $\text{C}_{24}\text{H}_{20}\text{F}_7\text{N}_4\text{O}^+$ : 513.1525; Found: 513.1519.

$R_f$  = 0.50 in 50% EtOAc in hexanes

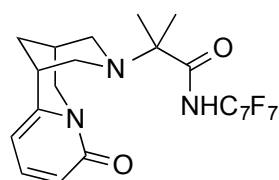

(16)

Note: Sodium iodide (1 equiv) was added to the reaction mixture.

Compound **16** was isolated in 85% yield as light yellow solid using the standard conditions.

MP 65-67 °C

IR (thin film): 1700, 1653  $\text{cm}^{-1}$

$^1\text{H}$  NMR (500 MHz,  $\text{CDCl}_3$ )  $\delta$  7.72 (s, 1H), 7.02 (dd,  $J = 6.5, 9$  Hz, 1H), 6.28 (app d,  $J = 9$  Hz, 1H), 5.94 (app d,  $J = 6.5$  Hz, 1H), 4.18 (d,  $J = 15.5$  Hz, 1H), 3.87 (dd,  $J = 6$  Hz, 15.5 Hz, 1H), 3.10-3.07 (multiple peaks, 2H), 2.87 (m, 1H), 2.66-2.56 (multiple peaks, 3H), 1.98 (m, 1H), 1.86 (m, 1H), 1.29 (s, 3H), 1.19 (s, 3H).

$^{19}\text{F}$  NMR (377 MHz,  $\text{CDCl}_3$ )  $\delta$  -56.1 (t,  $J = 22.6$  Hz, 3F), -141.0 (m, 2F), -142.8 (m, 2F).

The carbon resonances corresponding to the perfluoroarene ( $\text{C}_7\text{F}_7$ ) in this compound appear as a complex series of multiplets between 105 ppm to 155 ppm as a result of  $^{13}\text{C}/^{19}\text{F}$  coupling. Due to the complexities of the system, the peaks are not listed.  $^{19}\text{F}$  NMR and HRMS were used to confirm the presence of this ring system.

$^{13}\text{C}$  NMR (126 MHz,  $\text{CDCl}_3$ )  $\delta$  174.9, 163.0, 150.3, 138.3, 116.9, 104.8, 64.5, 55.7, 53.0, 49.9, 35.5, 28.0, 26.1, 23.5, 17.7.

HRMS (ESI $^+$ )  $[\text{M}+\text{H}]^+$  Calcd for  $\text{C}_{22}\text{H}_{21}\text{F}_7\text{N}_3\text{O}_2$ : 492.1517; Found: 492.1517.

$R_f = 0.09$  in 60% EtOAc in hexanes

### Isolation of Amino Products

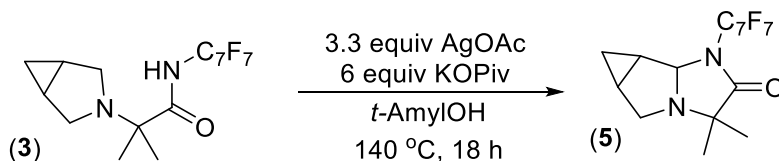

Under ambient conditions, a 4 mL scintillation vial was charged with amine **3** (45 mg, 0.12 mmol), AgOAc (65 mg, 0.39 mmol, 3.3 equiv), and KOPIV (94 mg, 0.67 mmol, 6 equiv). To the solids, *tert*-amyl alcohol (0.8 mL) was added. The vial was sealed with a Teflon-lined cap, wrapped in electrical tape, and heated to an external temperature of 140 °C. After 18 h, the reaction was removed from the heat source, diluted with EtOAc, and filtered through a plug of Celite. The filtrate was concentrated under reduced pressure. Final purification by column chromatography (10 g cartridge, gradient elution from 0% to 20% EtOAc in hexanes) afforded amino product **5** (26 mg, 58% yield) as a yellow oil.

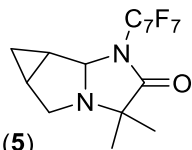

IR (thin film): 1728 (br)  $\text{cm}^{-1}$

$^1\text{H}$  NMR (700 MHz,  $\text{CDCl}_3$ )  $\delta$  5.29 (s, 1H), 3.10-3.03 (multiple peaks, 2H), 1.60 (m, 1H), 1.43 (ddd,  $J = 9.2, 6.2, 3.5$  Hz, 1H), 1.38 (s, 3H), 1.37 (s, 3H), 0.82 (q,  $J = 4.3$  Hz, 1H), 0.58 (td,  $J = 8.1, 4.9$  Hz, 1H).

$^{19}\text{F}$  NMR (377 MHz,  $\text{CDCl}_3$ )  $\delta$  -56.2 (t,  $J = 21.8$  Hz, 3F), -139.5 (br s, 1F), -140.2 (br s, 1F), -140.6 (m, 1F), -144.5 (m, 1F).

The carbon resonances corresponding to the perfluoroarene ( $\text{C}_7\text{F}_7$ ) in this compound appear as a complex series of multiplets between 105 ppm to 155 ppm as a result of  $^{13}\text{C}/^{19}\text{F}$  coupling. Due to the complexities of the system, the peaks are not listed.  $^{19}\text{F}$  NMR and HRMS were used to confirm the presence of this ring system.

$^{13}\text{C}$  NMR (176 MHz,  $\text{CDCl}_3$ )  $\delta$  177.4, 79.9, 63.7, 49.8, 24.9, 19.4, 17.5, 16.6, 6.0.

HRMS (ESI $^+$ )  $[\text{M}+\text{H}]^+$  Calcd for  $\text{C}_{16}\text{H}_{14}\text{F}_7\text{N}_2\text{O}^+$ : 383.0994; Found: 383.0992.

$R_f = 0.30$  in 20% EtOAc in hexanes

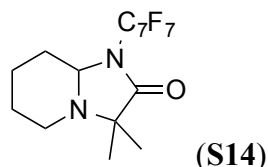

Note: No KOPiv was used; instead 20 mol%  $\text{Pd}(\text{OAc})_2$  was added.

Compound **S14** was isolated as faintly yellow solid in 47% yield.

MP 83  $^\circ\text{C}$

IR (thin film): 1736  $\text{cm}^{-1}$

$^1\text{H}$  NMR (700 MHz,  $\text{CDCl}_3$ )  $\delta$  4.25 (d,  $J = 8.3$  Hz, 1H), 2.90 (m, 1H), 2.44 (td,  $J = 11.4, 2.7$  Hz, 1H), 1.90 (m, 1H), 1.74-1.69 (m, 2H), 1.63 (m, 1H), 1.40 (t,  $J = 4.5$  Hz, 2H), 1.36 (s, 3H), 1.16 (s, 3H).

$^{19}\text{F}$  NMR (377 MHz,  $\text{CDCl}_3$ )  $\delta$  -56.2 (t,  $J = 21.7$  Hz, 3F), -139.1 (dd,  $J = 22.0, 11.1$  Hz, 1F), -139.5 (m, 1F), -140.8 (m, 1F), -143.7 (dd,  $J = 21.9, 10.3$  Hz, 1F).

The carbon resonances corresponding to the perfluoroarene ( $\text{C}_7\text{F}_7$ ) in this compound appear as a complex series of multiplets between 105 ppm to 155 ppm as a result of  $^{13}\text{C}/^{19}\text{F}$  coupling. Due to the complexities of the system, the peaks are not listed.  $^{19}\text{F}$  NMR and HRMS were used to confirm the presence of this ring system.

$^{13}\text{C}$  NMR (176 MHz,  $\text{CDCl}_3$ )  $\delta$  175.9, 74.7, 61.0, 42.8, 29.4, 25.1, 23.0, 22.6, 14.6.

HRMS (ESI $^+$ )  $[\text{M}+\text{H}]^+$  Calcd for  $\text{C}_{16}\text{H}_{16}\text{F}_7\text{N}_2\text{O}^+$ : 385.1151; Found: 385.1145.

$R_f = 0.35$  in 20% EtOAc in hexanes

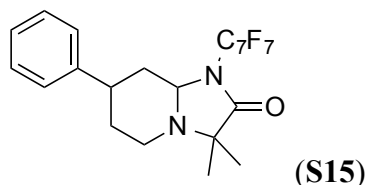

Compound **S15** was isolated as a yellow oil in 30% yield.

IR (thin film): 1741 (br)  $\text{cm}^{-1}$

$^1\text{H}$  NMR (700 MHz,  $\text{CDCl}_3$ )  $\delta$  7.30 (dd,  $J = 8.7, 6.7$  Hz, 2H), 7.27 – 7.19 (multiple peaks, 3H), 4.45 (dd,  $J = 10.2, 2.4$  Hz, 1H), 3.07 (dd,  $J = 11.2, 4.6$  Hz, 1H), 2.72 (tt,  $J = 12.3, 3.9$  Hz, 1H), 2.63 (td,  $J = 11.3, 2.9$  Hz, 1H), 1.97 (m, 1H), 1.89 (m, 2H), 1.65 (q,  $J = 11.2$  Hz, 1H), 1.43 (s, 3H), 1.23 (s, 3H).

$^{19}\text{F}$  NMR (377 MHz,  $\text{CDCl}_3$ )  $\delta$  -56.3 (t,  $J = 21.7$  Hz, 3F), -139.0 (dd,  $J = 22.1, 10.7$  Hz, 1F), -139.3 (m, 1F), -140.6 (m, 1F), -143.8 (dd,  $J = 22.1, 10.6$  Hz, 1F).

The carbon resonances corresponding to the perfluoroarene ( $\text{C}_7\text{F}_7$ ) in this compound appear as a complex series of multiplets between 105 ppm to 155 ppm as a result of  $^{13}\text{C}/^{19}\text{F}$  coupling. Due to the complexities of the system, the peaks are not listed.  $^{19}\text{F}$  NMR and HRMS were used to confirm the presence of this ring system.

$^{13}\text{C}$  NMR (176 MHz,  $\text{CDCl}_3$ )  $\delta$  175.8, 144.2, 128.6, 126.8, 126.7, 74.30, 60.9, 42.3, 41.4, 36.7, 32.9, 23.1, 14.7.

HRMS (ESI<sup>+</sup>)  $[\text{M}+\text{H}]^+$  Calcd for  $\text{C}_{22}\text{H}_{20}\text{F}_7\text{N}_2\text{O}^+$ : 461.1464; Found: 461.1458.

$R_f = 0.55$  in 20% EtOAc in hexanes



### III. Optimization and Scope of C–H Arylation of Azabicyclo[3.1.0]hexane 3

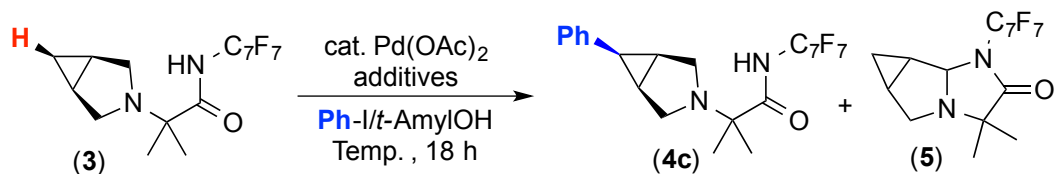

Under ambient conditions, a stock solution of  $\text{Pd(OAc)}_2$  (21 mg, 0.09 mmol) was prepared in dichloromethane (2 mL). An aliquot of this solution was transferred to a vial (4 mL capacity, 200  $\mu\text{L}$ , 0.009 mmol Pd, 30 mol %). The dichloromethane was removed by heating the open vial to 100  $^\circ\text{C}$  for approximately 20 s. To the concentrated  $\text{Pd(OAc)}_2$ , solid AgX (2 equiv) and/or base (3 equiv) were added.

A separate vial was charged with substrate (120 mg, 0.31 mmol). A mixture of PhI (710  $\mu\text{L}$ , 6.2 mmol, 20 equiv) and *tert*-amyl alcohol (2.8 mL) was gently heated (at  $\sim 60$   $^\circ\text{C}$ ) to form a homogeneous solution. An aliquot (370  $\mu\text{L}$ , 0.031 mmol substrate) of this solution was transferred to the vial containing  $\text{Pd(OAc)}_2$ , AgX, and/or base (prepared as described above). The vial was sealed with a Teflon lined cap, wrapped in electrical tape, and heated to the designated temperature on an aluminum heating block. After 18 h, the reaction was removed from the heat source and hydrazine (28  $\mu\text{L}$ , 35% in  $\text{H}_2\text{O}$ , 0.3 mmol, 10 equiv) was added to the warm solution. The addition of hydrazine resulted in the immediate precipitation of a black solid (presumably  $\text{Pd}^0$ ). A solution of internal standard (1,3,5-trimethoxybenzene, 168 mg in 5 mL of DCM) was prepared, and an aliquot (150  $\mu\text{L}$ ) of the stock standard solution was added to the reaction vial. The reaction solution was then diluted with EtOAc to an approximate total volume of 2 mL. The solution was then filtered through a pipette packed with Celite and was analyzed by GC-FID. The average value of duplicate GC injections was used to determine the GC yield based on a linear calibration curve (minimum 5 points) with 1,3,5-trimethoxybenzene.

Variations of this procedure were used in all optimization reactions (Table S1) where the yield was determined by GC-FID. For instance, the impact of the mol % of  $\text{Pd(OAc)}_2$  was determined by following the same procedure outlined above except that different volumes of the  $\text{Pd(OAc)}_2$  stock solution were transferred to each vial.

**Table S1.** Optimization for the C-H arylation of substrate 3 with iodobenzene.

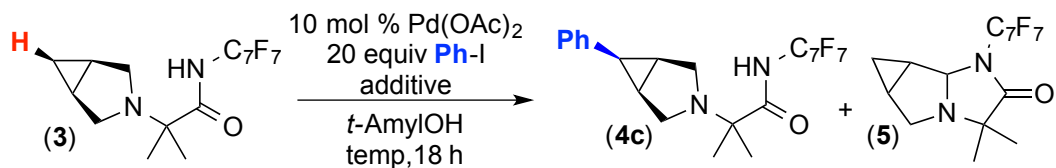

| entry           | Temp   | mol % Pd | AgX                             | base                            | conversion | yield 4c | yield 5 |
|-----------------|--------|----------|---------------------------------|---------------------------------|------------|----------|---------|
| 1               | 100 °C | 20%      | Ag <sub>2</sub> CO <sub>3</sub> | none                            | 75%        | 36%      | 11%     |
| 2               | 100 °C | 20%      | Ag <sub>2</sub> O               | none                            | 84%        | 21%      | 21%     |
| 3               | 100 °C | 20%      | AgOAc                           | none                            | 73%        | 56%      | 6%      |
| 4               | 100 °C | 20%      | AgTFA                           | none                            | 94%        | 21%      | 44%     |
| 5               | 100 °C | 20%      | AgOAc                           | K <sub>2</sub> CO <sub>3</sub>  | 67%        | 6%       | 17%     |
| 6               | 100 °C | 20%      | AgOAc                           | Cs <sub>2</sub> CO <sub>3</sub> | 78%        | 6%       | 29%     |
| 7               | 100 °C | 20%      | AgOAc                           | KOAc                            | 86%        | 78%      | 3%      |
| 8               | 100 °C | 20%      | AgOAc                           | KOPiv                           | 94%        | 83%      | 8%      |
| 9               | 100 °C | 20%      | AgOAc                           | CsOPiv                          | 93%        | 56%      | 13%     |
| 10              | 100 °C | 10%      | AgOAc                           | KOPiv                           | 75%        | 35%      | 7%      |
| 11              | 110 °C | 10%      | AgOAc                           | KOPiv                           | 81%        | 37%      | 9%      |
| 12              | 120 °C | 10%      | AgOAc                           | KOPiv                           | 89%        | 68%      | 6%      |
| 13              | 130 °C | 10%      | AgOAc                           | KOPiv                           | 99%        | 61%      | 9%      |
| 14              | 130 °C | 0%       | AgOAc                           | KOPiv                           | 85%        | 0%       | 28%     |
| 15              | 130 °C | 10%      | none                            | KOPiv                           | 99%        | 43%      | 4%      |
| 16 <sup>a</sup> | 130 °C | 10%      | none                            | CsOPiv                          | 69%        | 61%      | 8%      |
| 17 <sup>b</sup> | 130 °C | 10%      | none                            | CsOPiv                          | 100%       | 73%      | 4%      |
| 18 <sup>c</sup> | 130 °C | 10%      | none                            | CsOPiv                          | 99%        | 93%      | 5%      |

a) neat conditions, no *t*-AmylOH; b) *t*-AmylOH not dried; c) set up in glove box under N<sub>2</sub>

Under the optimal conditions, the crude reaction solution used from GC-FID analysis was concentrated under reduced pressure to remove excess PhI and *tert*-amyIOH. The residue was dissolved in CDCl<sub>3</sub> to provide the <sup>1</sup>H NMR spectrum below:

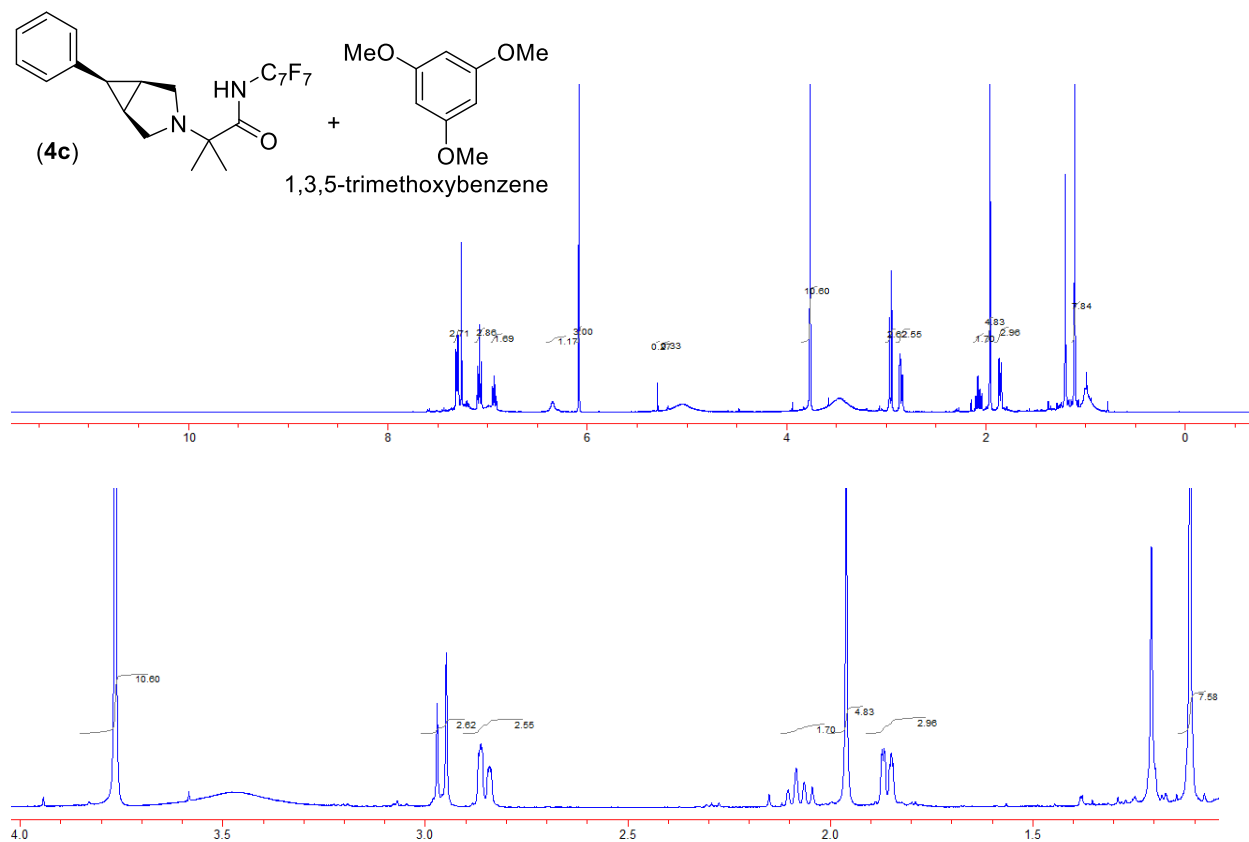

**Figure S1.** Crude <sup>1</sup>H NMR Spectrum of the C–H arylation of **3** after removal of volatiles.

#### IV. Scope of Ar-I for C-H Arylation of **3** (Isolated Yields)

##### Conditions A (CsOPiv)

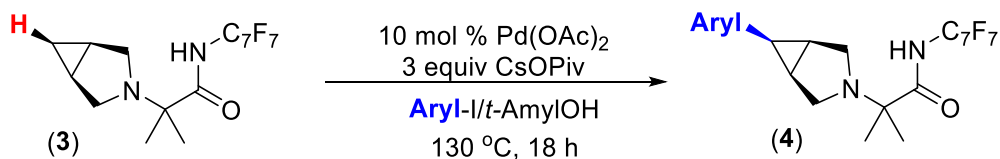

Under ambient conditions, a 20 mL scintillation vial was charged with solid substrate **3** (100 mg, 0.26 mmol, 1 equiv), Pd(OAc)<sub>2</sub> (6 mg, 0.03 mmol, 10 mol %) and iodoarene (when solid, 1-20 equiv). The vial was then brought inside of a glove box. To these solids, iodoarene (when liquid, 1-20 equiv), cesium pivalate (182 mg, 0.78 mmol, 3 equiv), and *tert*-amyl alcohol (2.4 mL) were added.<sup>1</sup> The vial was sealed with a Teflon-lined cap, wrapped in electrical tape, removed from the glove box, and heated to an external temperature of 130 °C. After 18 h, the reaction was removed from the heat source, and hydrazine (250 μL, 35% in H<sub>2</sub>O, 2.7 mmol, 10 equiv) was added to the warm solution. The mixture was then allowed to stir for 10 to 30 min at 60 °C to remove ligated Pd from the product. The resulting solution was diluted with EtOAc (~5 mL) and filtered through a layered plug of Celite and basic alumina. The plug was rinsed with additional EtOAc, and the resulting solution was concentrated under reduced pressure. Purification by column chromatography (25 g cartridge, gradient elution from 0% to 20% EtOAc in hexanes) afforded the desired product. Table S2 (below) summarizes the results using these conditions with various Aryl-I.

<sup>1</sup> The use of a glove box was not necessary to obtain reliable conversion in the C-H activation reaction. In general, the yield using a glove box was 10-15% higher than when conducted under ambient atmosphere with reagents stored under ambient conditions. This observation was unique to the azabicyclo[3.1.0]hexane system (substrate **3**).

**Table S2.** C-H arylation of azabicyclo[3.1.0]hexane system under conditions A.

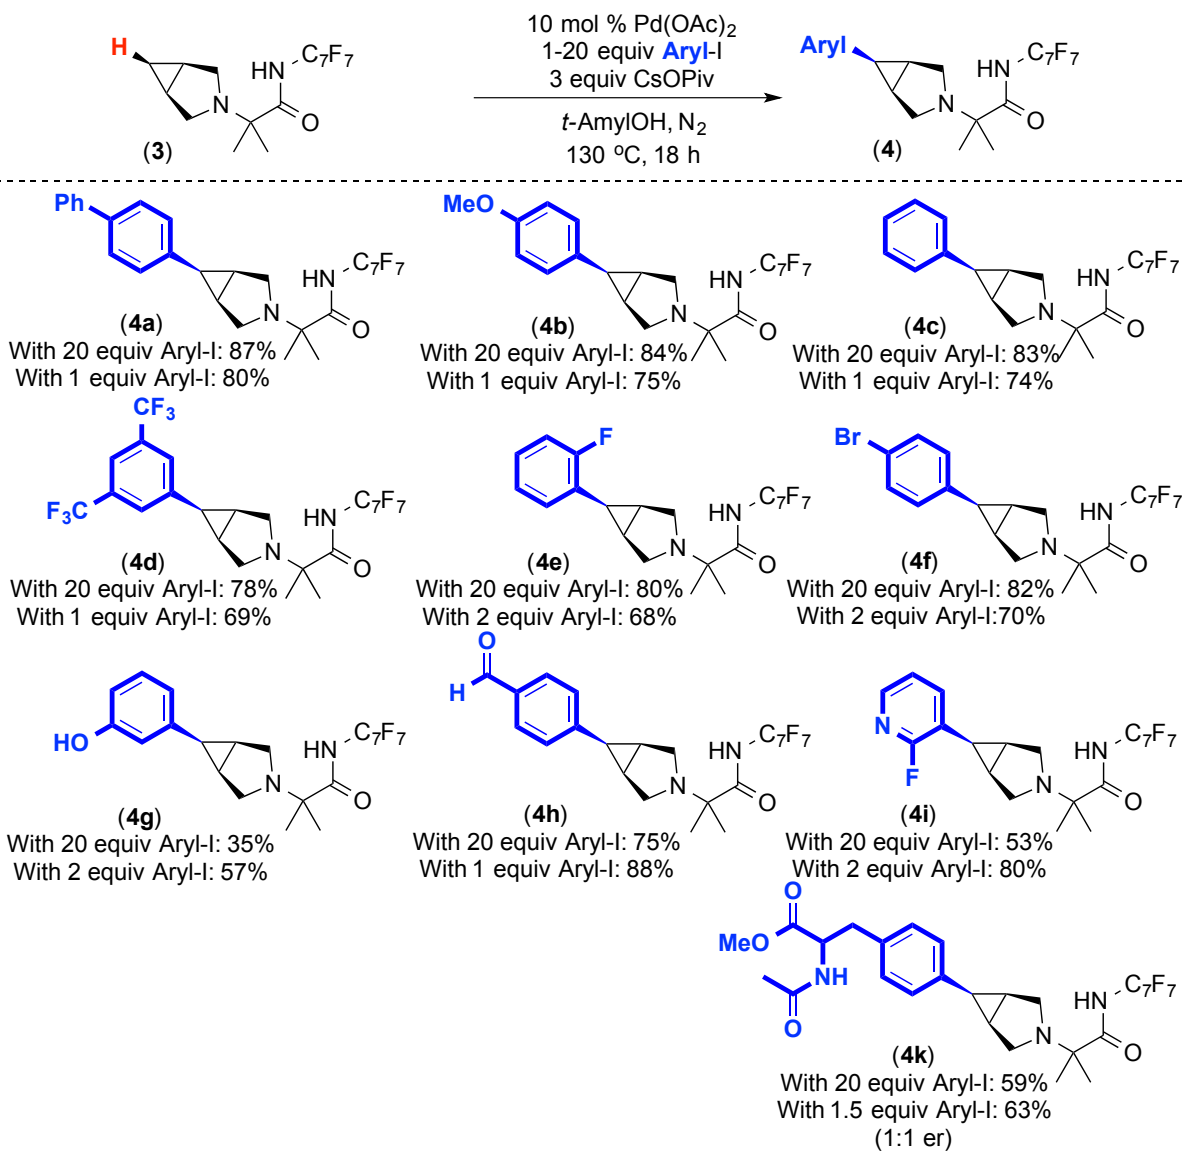

### Conditions B (AgOAc and KOPiv)

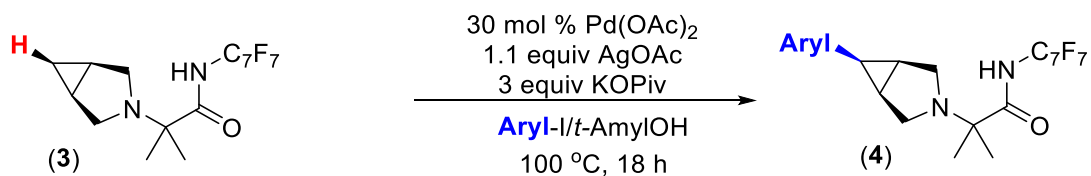

Example given for Aryl-I = PhI: Under ambient conditions, a 20 mL scintillation vial was charged with solid substrate (100 mg, 0.26 mmol, 1 equiv), Pd(OAc)<sub>2</sub> (18 mg, 0.08 mmol, 30 mol %), AgOAc (52 mg, 0.31 mmol, 1.2 equiv), and KOPiv (109 mg, 0.78 mmol, 3 equiv). To these solids, PhI (590  $\mu$ L, 5.2 mmol, 20 equiv) and *tert*-amyl alcohol (2.4 mL) were added. The vial was sealed with a Teflon-lined cap and heated to an external temperature of 100 °C. After 18 h, the reaction was removed from the heat source, and hydrazine (250  $\mu$ L, 35% in H<sub>2</sub>O, 2.7 mmol, 10 equiv) was added to the warm solution. The addition of hydrazine resulted in the immediate precipitation of a black solid. The reaction mixture was diluted with EtOAc and filtered through a layered plug of Celite and basic alumina. The resulting solution was concentrated under vacuum. Final purification by column chromatography (25 g cartridge, gradient elution from 0% to 20% EtOAc in hexanes) afforded the desired product (95 mg, 79% yield) as a white solid. Table S3 (below) summarizes the results using these conditions with various Aryl-I.

**Table S3.** C-H arylation of azabicyclo[3.1.0]hexane system under conditions B.

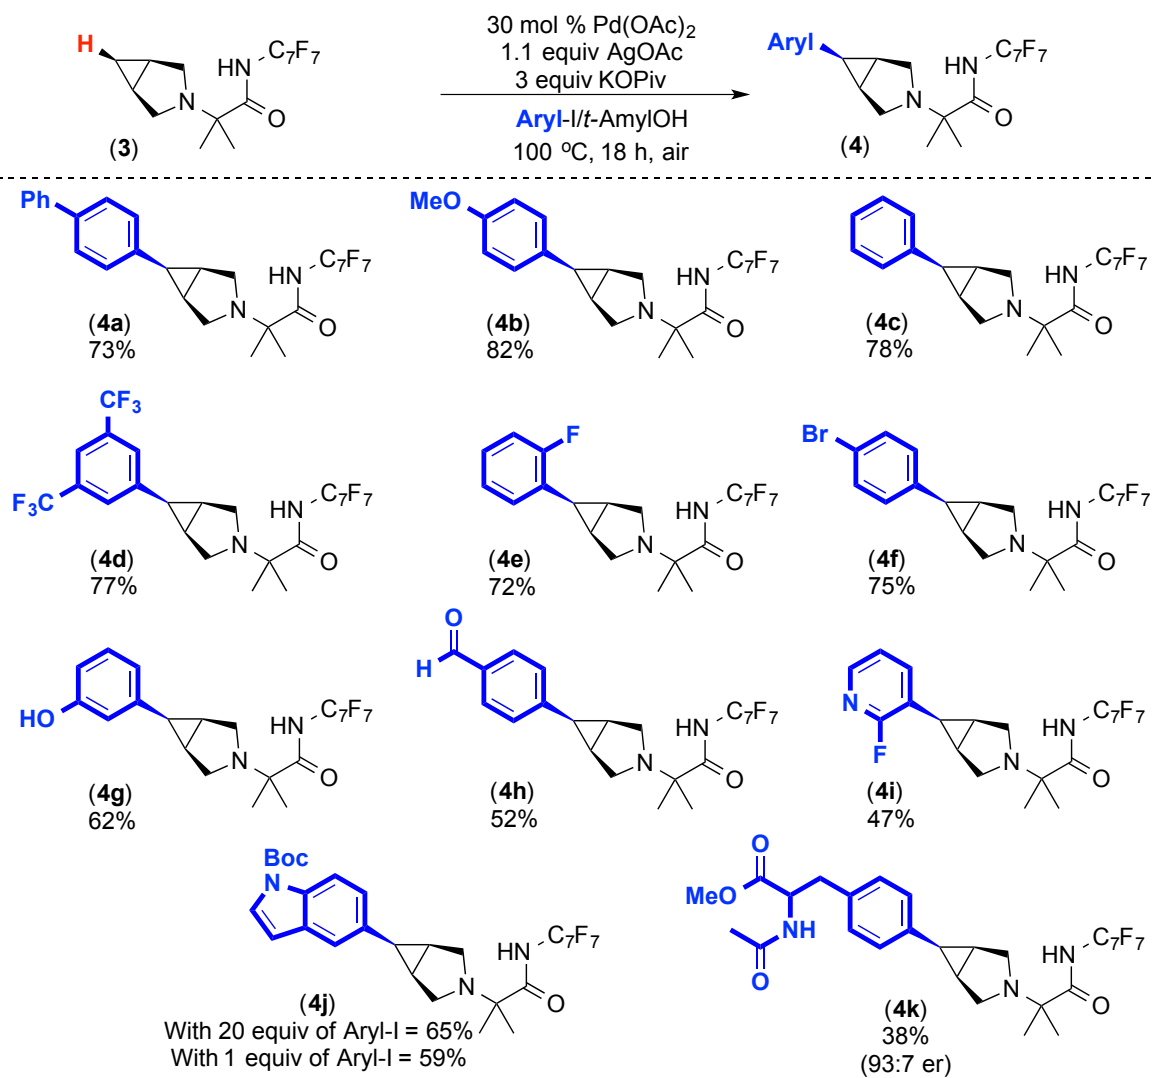

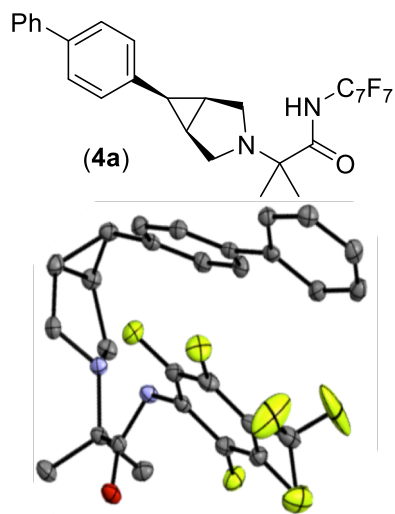

Isolated yield using standard conditions A (using 1 equiv of Aryl-I): 80% yield

Isolated yield using standard conditions A (using 20 equiv of Aryl-I): 84%, 89%; 87% average yield

Isolated yield using standard conditions B: 82%, 63%; 73% average yield

MP 116-118 °C (white solid)

IR (thin film): 1705 (br)  $\text{cm}^{-1}$

$^1\text{H}$  NMR (700 MHz,  $\text{CDCl}_3$ )  $\delta$  7.43-7.36 (multiple peaks, 4H), 7.34-7.21 (multiple peaks, 5H), 6.37 (s, 1H), 3.01 (d,  $J = 9.2$  Hz, 2H), 2.90 (dt,  $J = 9.2, 1.7$  Hz, 2H), 2.13 (t,  $J = 8.1$  Hz, 1H), 1.89 (dt,  $J = 8.2, 1.6$  Hz, 2H), 1.16 (s, 6H).

$^{19}\text{F}$  NMR (377 MHz,  $\text{CDCl}_3$ )  $\delta$  -56.2 (t,  $J = 21.7$  Hz, 3F), -141.4 (m, 2F), -143.0 (m, 2F).

The carbon resonances corresponding to the perfluoroarene ( $\text{C}_7\text{F}_7$ ) in this compound appear as a complex series of multiplets between 105 ppm to 155 ppm as a result of  $^{13}\text{C}/^{19}\text{F}$  coupling. Due to the complexities of the system, the peaks are not listed.  $^{19}\text{F}$  NMR and HRMS were used to confirm the presence of this ring system.

$^{13}\text{C}$  NMR (176 MHz,  $\text{CDCl}_3$ )  $\delta$  176.4, 138.9, 137.9, 137.1, 128.8, 128.7, 127.5, 126.3, 125.4, 61.04, 45.2, 22.4, 21.1, 20.1.

HRMS (ESI $^+$ )  $[\text{M}+\text{H}]^+$  Calcd for  $\text{C}_{28}\text{H}_{24}\text{F}_7\text{N}_2\text{O}^+$ : 537.1777; Found: 537.1773.

$R_f = 0.55$  in 20% EtOAc in hexanes

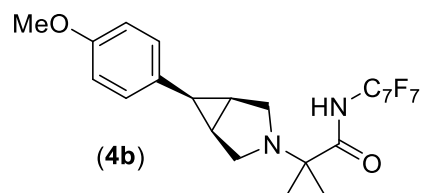

Isolated yield using standard conditions A (using 1 equiv of Aryl-I): 75% yield

Isolated yield using standard conditions A (using 20 equiv of Aryl-I): 83%, 84%; 84% average yield

Isolated yield using standard conditions B: 81%, 82%; 82% average yield

MP 75-77 °C (white solid)

IR (thin film): 1711  $\text{cm}^{-1}$



$^1\text{H}$  NMR (700 MHz,  $\text{CDCl}_3$ )  $\delta$  7.20 (d,  $J = 8.4$  Hz, 2H), 6.56 (d,  $J = 8.4$  Hz, 2H), 6.51 (s, 1H), 3.53 (s, 3H), 2.94 (d,  $J = 9.1$  Hz, 2H), 2.87 (ddd,  $J = 9.1, 2.6, 1.4$  Hz, 2H), 1.99 (t,  $J = 8.0$  Hz, 1H), 1.81 (ddd,  $J = 8.0, 2.6, 1.3$  Hz, 2H), 1.14 (s, 6H).

$^{19}\text{F}$  NMR (377 MHz,  $\text{CDCl}_3$ )  $\delta$  -56.1 (t,  $J = 21.8$  Hz, 3F), -141.4 (m, 2F), -143.1 (m, 2F).

The carbon resonances corresponding to the perfluoroarene ( $\text{C}_7\text{F}_7$ ) in this compound appear as a complex series of multiplets between 105 ppm to 155 ppm as a result of  $^{13}\text{C}/^{19}\text{F}$  coupling. Due to the complexities of the system, the peaks are not listed.  $^{19}\text{F}$  NMR and HRMS were used to confirm the presence of this ring system.

$^{13}\text{C}$  NMR (176 MHz,  $\text{CDCl}_3$ )  $\delta$  176.1, 157.5, 129.7, 128.9, 113.4, 60.9, 54.6, 45.1, 22.8, 20.9, 20.0.

HRMS (ESI<sup>+</sup>)  $[\text{M}+\text{H}]^+$  Calcd for  $\text{C}_{23}\text{H}_{22}\text{F}_7\text{N}_2\text{O}_2^+$ : 491.1570; Found: 491.1560.

$R_f = 0.50$  in 20% EtOAc in hexanes

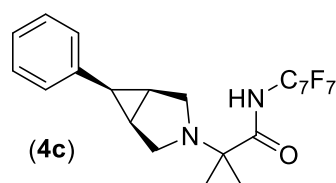

Isolated yield using standard conditions A (using 1 equiv of Aryl-I): 74% yield

Isolated yield using standard conditions A (using 20 equiv of Aryl-I): 75%, 90%, 84%; 83% average yield

Isolated yield using standard conditions B: 74%, 80%, 79%; 78% average yield

MP 83-85 °C (white solid)

IR (thin film): 1711  $\text{cm}^{-1}$

$^1\text{H}$  NMR (700 MHz,  $\text{CDCl}_3$ )  $\delta$  7.30 (d,  $J = 7.5$  Hz, 2H), 7.08 (t,  $J = 7.6$  Hz, 2H), 6.93 (t,  $J = 7.4$  Hz, 1H), 6.34 (s, 1H), 2.95 (d,  $J = 9.1$  Hz, 2H), 2.85 (dt,  $J = 9.1, 2.0$  Hz, 2H), 2.08 (t,  $J = 8.1$  Hz, 1H), 1.86 (dt,  $J = 8.4, 1.8$  Hz, 2H), 1.11 (s, 6H).

$^{19}\text{F}$  NMR (471 MHz,  $\text{CDCl}_3$ )  $\delta$  -56.0 (t,  $J = 21.7$  Hz, 3F), -141.5 (m, 2F), -144.6 (m, 2F).

The carbon resonances corresponding to the perfluoroarene ( $\text{C}_7\text{F}_7$ ) in this compound appear as a complex series of multiplets between 105 ppm to 155 ppm as a result of  $^{13}\text{C}/^{19}\text{F}$  coupling. Due to the complexities of the system, the peaks are not listed.  $^{19}\text{F}$  NMR and HRMS were used to confirm the presence of this ring system.

$^{13}\text{C}$  NMR (176 MHz,  $\text{CDCl}_3$ )  $\delta$  175.9, 138.0, 128.1, 128.0, 125.9, 60.9, 45.0, 22.8, 20.8, 19.9.

HRMS (ESI<sup>+</sup>)  $[\text{M}+\text{H}]^+$  Calcd for  $\text{C}_{22}\text{H}_{20}\text{F}_7\text{N}_2\text{O}^+$ : 461.1464; Found: 461.1458.

Anal. Calc for  $\text{C}_{22}\text{H}_{19}\text{F}_7\text{N}_2\text{O}$ : C, 57.39; H, 4.16. Found C, 57.14; H, 3.99. Found C, 57.12; H, 4.03.

$R_f = 0.67$  in 20% EtOAc in hexanes

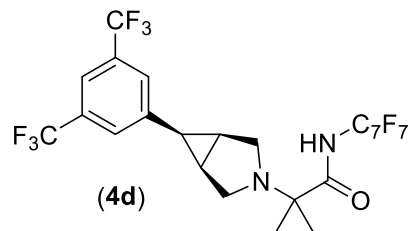

Isolated yield using standard conditions A (using 1 equiv of Aryl-I): 69% yield

Isolated yield using standard conditions A (using 20 equiv of Aryl-I): 77%, 79%; 78% average yield

Isolated yield using standard conditions B: 75%, 79%; 77% average yield

MP 116-118 °C (white solid)

$^1\text{H}$  NMR (700 MHz,  $\text{CDCl}_3$ )  $\delta$  7.77 (s, 2H), 7.56 (s, 1H), 6.09 (s, 1H), 2.97 (d,  $J = 9.7$  Hz, 2H), 2.93 (ddd,  $J = 9.7, 2.5, 1.4$  Hz, 2H), 2.15 (t,  $J = 8.0$  Hz, 1H), 2.00 (ddd,  $J = 8.0, 2.5, 1.3$  Hz, 2H), 1.14 (s, 6H).

$^{19}\text{F}$  NMR (377 MHz,  $\text{CDCl}_3$ )  $\delta$  -56.3 (t,  $J = 21.8$  Hz, 3F), -63.5 (s, 6F), -141.3 (m, 2F), -143.7 (m, 2F).

The carbon resonances corresponding to the perfluoroarene ( $\text{C}_7\text{F}_7$ ) in this compound appear as a complex series of multiplets between 105 ppm to 155 ppm as a result of  $^{13}\text{C}/^{19}\text{F}$  coupling. Due to the complexities of the system, the peaks are not listed.  $^{19}\text{F}$  NMR and HRMS were used to confirm the presence of this ring system.

$^{13}\text{C}$  NMR (176 MHz,  $\text{CDCl}_3$ )  $\delta$  174.6, 141.0, 131.5 (q,  $J_{\text{C-F}} = 33.9$  Hz), 128.5 (q,  $J_{\text{C-F}} = 3.1$  Hz), 122.9 (q,  $J_{\text{C-F}} = 271$  Hz), 119.7 (q,  $J_{\text{C-F}} = 3.9$  Hz), 61.2, 45.0, 22.5, 20.6, 20.5.

HRMS (ESI $^+$ )  $[\text{M}+\text{H}]^+$  Calcd for  $\text{C}_{24}\text{H}_{18}\text{F}_{13}\text{N}_2\text{O}^+$ : 597.1212; Found: 597.1206.

$R_f = 0.67$  in 20% EtOAc in hexanes

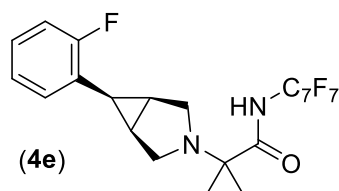

Isolated yield using standard conditions A (using 2 equiv of Aryl-I): 68% yield

Isolated yield using standard conditions A (using 20 equiv of Aryl-I): 80%, 79%; 80% average yield

Isolated yield using standard conditions B: 78%, 65%; 72% average yield

MP 60-65 °C (white solid)

IR (thin film): 1712 (br)  $\text{cm}^{-1}$

$^1\text{H}$  NMR (700 MHz,  $\text{CDCl}_3$ )  $\delta$  7.33 (td,  $J = 7.4, 1.6$  Hz, 1H), 6.93 (m, 1H), 6.89-6.81 (multiple peaks, 2H), 6.48 (s, 1H), 3.00 (d,  $J = 9.3$  Hz, 2H), 2.84 (dt,  $J = 9.3, 1.7$  Hz, 2H), 1.94 (multiple peaks, 3H), 1.13 (s, 6H).

$^{19}\text{F}$  NMR (471 MHz,  $\text{CDCl}_3$ )  $\delta$  -56.1 (t,  $J = 21.8$  Hz, 3F), -116.1 (q,  $J = 7.4$  Hz, 1F), -141.5 (m, 2F), -143.5 (m, 2F).

The carbon resonances corresponding to the perfluoroarene ( $\text{C}_7\text{F}_7$ ) in this compound appear as a complex series of multiplets between 105 ppm to 155 ppm as a result of  $^{13}\text{C}/^{19}\text{F}$  coupling. Due to the complexities of the system, the peaks are not listed.  $^{19}\text{F}$  NMR and HRMS were used to confirm the presence of this ring system.

$^{13}\text{C}$  NMR (176 MHz,  $\text{CDCl}_3$ )  $\delta$  175.64, 161.2 (d,  $J_{\text{C-F}} = 247$  Hz), 130.4 (d,  $J_{\text{C-F}} = 4.5$  Hz), 127.5 (d,  $J_{\text{C-F}} = 7.7$  Hz), 125.5 (d,  $J_{\text{C-F}} = 16.1$  Hz), 123.3 (d,  $J_{\text{C-F}} = 3.1$  Hz), 115.2 (d,  $J_{\text{C-F}} = 22.2$  Hz), 61.10, 45.6, 20.7, 19.9, 18.1.

HRMS (ESI $^+$ )  $[\text{M}+\text{H}]^+$  Calcd for  $\text{C}_{22}\text{H}_{19}\text{F}_8\text{N}_2\text{O}^+$ : 479.1370; Found: 479.1364.

$R_f = 0.67$  in 20% EtOAc in hexanes

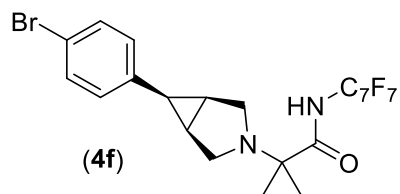

Isolated yield using standard conditions A (using 2 equiv of Aryl-I): 70% yield

Isolated yield using standard conditions A (using 20 equiv of Aryl-I): 81%, 83%; 82% average yield

Isolated yield using standard conditions B: 81%, 68%; 75% average yield

MP 105-108 °C (white solid)

IR (thin film): 1712  $\text{cm}^{-1}$

$^1\text{H}$  NMR (700 MHz,  $\text{CDCl}_3$ )  $\delta$  7.22 – 7.15 (multiple peaks, 4H), 6.39 (s, 1H), 2.93 (d,  $J = 9.3$  Hz, 2H), 2.88 (ddd,  $J = 9.2, 2.6, 1.4$  Hz, 2H), 2.00 (t,  $J = 8.0$  Hz, 1H), 1.87 (ddd,  $J = 8.0, 2.6, 1.3$  Hz, 2H), 1.14 (s, 6H).

$^{19}\text{F}$  NMR (471 MHz,  $\text{CDCl}_3$ )  $\delta$  -56.2 (t,  $J = 21.7$  Hz, 3F), -141.1 (m, 2F), -143.0 (m, 2F).

The carbon resonances corresponding to the perfluoroarene ( $\text{C}_7\text{F}_7$ ) in this compound appear as a complex series of multiplets between 105 ppm to 155 ppm as a result of  $^{13}\text{C}/^{19}\text{F}$  coupling. Due to the complexities of the system, the peaks are not listed.  $^{19}\text{F}$  NMR and HRMS were used to confirm the presence of this ring system.

$^{13}\text{C}$  NMR (176 MHz,  $\text{CDCl}_3$ )  $\delta$  175.9, 137.0, 131.3, 129.9, 119.9, 61.0, 45.0, 22.3, 21.0, 20.0.

HRMS (ESI $^+$ )  $[\text{M}+\text{H}]^+$  Calcd for  $\text{C}_{22}\text{H}_{17}\text{BrF}_7\text{N}_2\text{O}^+$ : 539.0569; Found: 539.0561.

Anal. Calc for  $\text{C}_{22}\text{H}_{16}\text{BrF}_7\text{N}_2\text{O}$ : C, 49.00; H, 3.36. Found C, 48.93; H, 3.40. Found C, 49.10; H, 3.33.

$R_f = 0.50$  in 20% EtOAc in hexanes

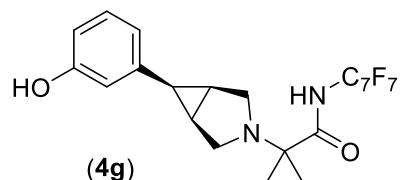

NOTE: chromatography gradient was 0% to 30% EtOAc in hexanes

Isolated yield using standard conditions A (using 2 equiv of Aryl-I): 57% yield

Isolated yield using standard conditions A (using 20 equiv of Aryl-I): 35%, 32%; 34% average yield

Isolated yield using standard conditions B: 64%, 59%; 62% average yield

MP 200-203 °C (white solid)

IR (thin film): 1684  $\text{cm}^{-1}$

$^1\text{H}$  NMR (700 MHz,  $\text{CD}_3\text{OD}$ )  $\delta$  6.97 (t,  $J = 7.8$  Hz, 1H), 6.82 (dd,  $J = 7.8, 1.2$  Hz, 1H), 6.68 (dd,  $J = 2.6, 1.4$  Hz, 1H), 6.27 (dd,  $J = 8.0, 2.4$  Hz, 1H), 3.00 (d,  $J = 9.0$  Hz, 2H), 2.86 (ddd,  $J = 9.0, 2.5, 1.4$  Hz, 2H), 2.00 (t,  $J = 8.0$  Hz, 1H), 1.83 (ddd,  $J = 8.0, 2.6, 1.2$  Hz, 2H), 1.11 (s, 6H).

$^{19}\text{F}$  NMR (377 MHz,  $\text{CD}_3\text{OD}$ )  $\delta$  -56.9 (t,  $J = 21.2$  Hz, 3F), -144.1 (multiple peaks, 4F).

The carbon resonances corresponding to the perfluoroarene ( $\text{C}_7\text{F}_7$ ) in this compound appear as a complex series of multiplets between 105 ppm to 155 ppm as a result of  $^{13}\text{C}/^{19}\text{F}$  coupling. Due to the complexities of the system, the peaks are not listed.  $^{19}\text{F}$  NMR and HRMS were used to confirm the presence of this ring system.

$^{13}\text{C}$  NMR (176 MHz,  $\text{CD}_3\text{OD}$ )  $\delta$  177.3, 157.0, 139.5, 128.9, 118.8, 114.5, 112.4, 60.6, 44.5, 22.4, 19.9, 19.4.

HRMS (ESI<sup>+</sup>)  $[\text{M}+\text{H}]^+$  Calcd for  $\text{C}_{22}\text{H}_{20}\text{F}_7\text{N}_2\text{O}_2^+$ : 477.1413; Found: 477.1408.

$R_f$  = 0.40 in 20% EtOAc in hexanes

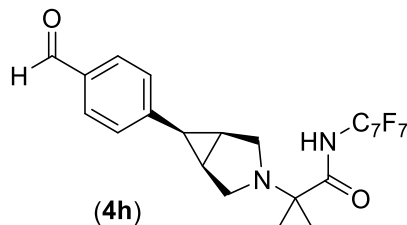

NOTE: Due to the rapid formation of a hydrazone, hydrazine was not used in the isolation of this aldehyde. Instead, the reaction was diluted with MeOH (0.2 mL) and heated at 60 °C for 4 h prior to filtration.

Isolated yield using standard conditions A (using 1 equiv of Aryl-I): 88% yield

Isolated yield using standard conditions A (using 20 equiv of Aryl-I): 75%, 76%; 75% average yield

Isolated yield using standard conditions B: 54%, 50%; 52% average yield

MP 116 °C (white solid)

IR (thin film): 1704, 1700  $\text{cm}^{-1}$

$^1\text{H}$  NMR (700 MHz,  $\text{CDCl}_3$ )  $\delta$  9.77 (s, 1H), 7.61 (m, 2H), 7.46 (m, 2H), 6.19 (s, 1H), 2.95 (d,  $J$  = 9.5 Hz, 2H), 2.88 (ddd,  $J$  = 9.4, 2.4, 1.3 Hz, 2H), 2.13 (t,  $J$  = 8.0 Hz, 1H), 1.94 (ddd,  $J$  = 8.1, 2.6, 1.3 Hz, 2H), 1.11 (s, 6H).

$^{19}\text{F}$  NMR (377 MHz,  $\text{CDCl}_3$ )  $\delta$  -56.2 (t,  $J$  = 21.7 Hz, 3F), -140.9 (m, 2F), -143.0 (m, 2F).

The carbon resonances corresponding to the perfluoroarene ( $\text{C}_6\text{F}_5$ ) in this compound appear as a complex series of multiplets between 105 ppm to 155 ppm as a result of  $^{13}\text{C}/^{19}\text{F}$  coupling. Due to the complexities of the system, the peaks are not listed.  $^{19}\text{F}$  NMR and HRMS were used to confirm the presence of this ring system.

$^{13}\text{C}$  NMR (176 MHz,  $\text{CDCl}_3$ )  $\delta$  190.6, 175.3, 145.3, 134.5, 129.2, 128.7, 61.0, 45.0, 23.0, 20.8, 20.2.

HRMS (ESI<sup>+</sup>)  $[\text{M}+\text{H}]^+$  Calcd for  $\text{C}_{23}\text{H}_{20}\text{F}_7\text{N}_2\text{O}_2^+$ : 489.1413; Found: 489.1407.

$R_f$  = 0.45 in 20% EtOAc in hexanes

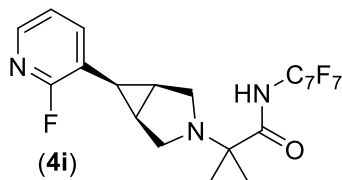

NOTE: chromatography gradient was 0% to 40% EtOAc in hexanes.

Isolated yield using standard conditions A (using 2 equiv of Aryl-I): 80% yield

Isolated yield using standard conditions A (using 20 equiv of Aryl-I): 53% yield

Isolated yield using standard conditions B: 45%, 48%; 47% average yield

MP 118-120 °C (white solid)

IR (thin film): 1710  $\text{cm}^{-1}$

$^1\text{H}$  NMR (700 MHz,  $\text{CDCl}_3$ )  $\delta$  7.90 (d,  $J = 4.4$  Hz, 1H), 7.78 (t,  $J = 8.4$  Hz, 1H), 6.99 (ddd,  $J = 6.9, 4.8, 1.7$  Hz, 1H), 6.46 (s, 1H), 2.98 (d,  $J = 9.5$  Hz, 2H), 2.86 (dt,  $J = 9.6, 1.7$  Hz, 2H), 2.01 – 1.93 (m, 3H), 1.13 (s, 6H).

$^{19}\text{F}$  NMR (471 MHz,  $\text{CDCl}_3$ )  $\delta$  -56.1 (t,  $J = 21.8$  Hz, 3F), -70.1 (d,  $J = 9.1$  Hz, 1F), -141.1 (m, 2F), -142.8 (m, 2F).

The carbon resonances corresponding to the perfluoroarene ( $\text{C}_7\text{F}_7$ ) in this compound appear as a complex series of multiplets between 105 ppm to 155 ppm as a result of  $^{13}\text{C}/^{19}\text{F}$  coupling. Due to the complexities of the system, the peaks are not listed.  $^{19}\text{F}$  NMR and HRMS were used to confirm the presence of this ring system.

$^{13}\text{C}$  NMR (176 MHz,  $\text{CDCl}_3$ )  $\delta$  174.86, 162.6 (d,  $J_{\text{C-F}} = 241$  Hz), 145.2 (d,  $J_{\text{C-F}} = 13.8$  Hz), 140.5 (d,  $J_{\text{C-F}} = 5.5$  Hz), 120.6 (d,  $J_{\text{C-F}} = 4.3$  Hz), 120.5 (d,  $J_{\text{C-F}} = 30.7$  Hz), 61.3, 45.5, 20.6, 20.1, 17.5 (d,  $J_{\text{C-F}} = 3.2$  Hz).

HRMS (ESI $^+$ )  $[\text{M}+\text{H}]^+$  Calcd for  $\text{C}_{21}\text{H}_{18}\text{F}_8\text{N}_3\text{O}^+$ : 480.1322; Found: 480.1318.

$R_f = 0.80$  in 50% EtOAc in hexanes

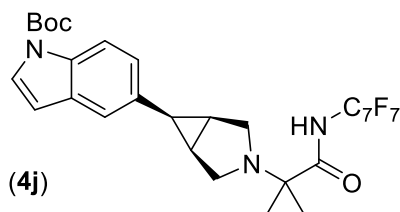

Isolated yield using standard conditions B (using 2 equiv of Aryl-I): 59% yield

Isolated yield using standard conditions B (using 20 equiv of Aryl-I): 62%, 67%; 65% average yield

MP 158-161  $^\circ\text{C}$  (white solid)

IR (thin film): 1733, 1701  $\text{cm}^{-1}$

$^1\text{H}$  NMR (700 MHz,  $\text{CDCl}_3$ )  $\delta$  8.05 (d,  $J = 8.5$  Hz, 1H), 7.40 (s, 1H), 7.30 (m, 1H), 7.17 (d,  $J = 3.8$  Hz, 1H), 6.15 – 6.10 (multiple peaks, 2H), 3.00 (d,  $J = 9.1$  Hz, 2H), 2.88 (dt,  $J = 9.2, 1.9$  Hz, 2H), 2.14 (t,  $J = 8.1$  Hz, 1H), 1.86 (dt,  $J = 8.1, 1.9$  Hz, 2H), 1.64 (s, 9H), 1.11 (s, 6H).

$^{19}\text{F}$  NMR (377 MHz,  $\text{CDCl}_3$ )  $\delta$  -56.2 (t,  $J = 21.7$  Hz, 3F), -142.0 (m, 7.4 Hz, 2F), -143.9 (m, 2F).

The carbon resonances corresponding to the perfluoroarene ( $\text{C}_7\text{F}_7$ ) in this compound appear as a complex series of multiplets between 105 ppm to 155 ppm as a result of  $^{13}\text{C}/^{19}\text{F}$  coupling. Due to the complexities of the system, the peaks are not listed.  $^{19}\text{F}$  NMR and HRMS were used to confirm the presence of this ring system.

$^{13}\text{C}$  NMR (176 MHz,  $\text{CDCl}_3$ )  $\delta$  176.2, 149.0, 132.12, 130.1, 125.6, 124.3, 119.9, 115.0, 112.9, 105.8, 83.9, 60.76, 45.04, 27.89, 22.70, 21.4 (br s), 20.07.

HRMS (ESI $^+$ )  $[\text{M}+\text{H}]^+$  Calcd for  $\text{C}_{29}\text{H}_{29}\text{F}_7\text{N}_3\text{O}_3^+$ : 600.2097; Found: 600.2091.

$R_f = 0.60$  in 20% EtOAc in hexanes

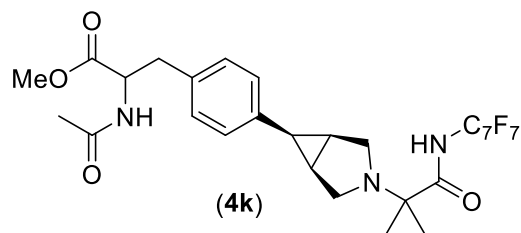

NOTE: Hydrazine was not used in the isolation of this substrate due to the rapid N-deacylation of the product in the presence of hydrazine. Instead, the reaction was diluted with MeOH (0.4 mL) and heated at 60 °C for 4 h prior to filtration. Chromatography gradient was 0% to 60% EtOAc in hexanes.

Isolated yield using standard conditions A (using 1.5 equiv of Aryl-I): 63% yield

Isolated yield using standard conditions A (using 20 equiv of Aryl-I): 59%, 59%; 59% average yield (1:1 er)

Isolated yield using standard conditions B: 43%, 33%; 38% average yield (93:7 er)

MP 112-115 °C (white solid)

IR (thin film): 1700 (br)  $\text{cm}^{-1}$

$^1\text{H}$  NMR (700 MHz,  $\text{CDCl}_3$ )  $\delta$  7.22 (d,  $J = 7.9$  Hz, 2H), 6.82 (d,  $J = 7.9$  Hz, 2H), 6.42 (s, 1H), 5.78 (d,  $J = 7.8$  Hz, 1H), 4.65 (dt,  $J = 7.9, 5.9$  Hz, 1H), 3.68 (s, 3H), 2.94 (dd,  $J = 9.2, 6.7$  Hz, 2H), 2.84 (dd,  $J = 9.3, 2.9$  Hz, 2H), 2.74 (dd,  $J = 13.9, 6.1$  Hz, 1H), 2.63 (dd,  $J = 13.9, 5.8$  Hz, 1H), 2.02 (t,  $J = 8.0$  Hz, 1H), 1.93 (s, 3H), 1.88-1.81 (multiple peaks, 2H), 1.11 (s, 3H), 1.10 (s, 3H).

$^{19}\text{F}$  NMR (377 MHz,  $\text{CDCl}_3$ )  $\delta$  -56.1 (t,  $J = 21.8$  Hz, 3F), -141.4 (m, 2F), -142.6 (m, 2F).

The carbon resonances corresponding to the perfluoroarene ( $\text{C}_7\text{F}_7$ ) in this compound appear as a complex series of multiplets between 105 ppm to 155 ppm as a result of  $^{13}\text{C}/^{19}\text{F}$  coupling. Due to the complexities of the system, the peaks are not listed.  $^{19}\text{F}$  NMR and HRMS were used to confirm the presence of this ring system.

$^{13}\text{C}$  NMR (176 MHz,  $\text{CDCl}_3$ )  $\delta$  175.8, 171.9, 169.3, 136.8, 133.8, 128.8, 128.3, 61.0, 52.9, 52.2, 45.1, 45.0, 37.2, 22.9, 22.4, 21.0, 20.6, 19.9, 19.8

HRMS (ESI<sup>+</sup>)  $[\text{M}+\text{H}]^+$  Calcd for  $\text{C}_{28}\text{H}_{29}\text{F}_7\text{N}_3\text{O}_4^+$ : 604.2046; Found: 604.2038.

$R_f = 0.30$  in 50% EtOAc in hexanes

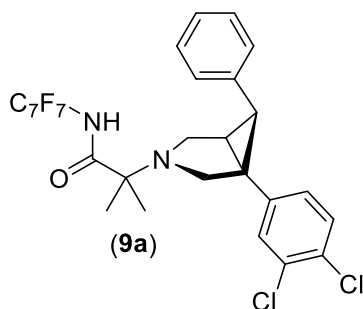

NOTE: The arylation reaction was conducted at 120 °C under air.  $\text{NaBH}_4$  reduction was required on this substrate following the **Isolation Procedure B** found in the **Standard Conditions for C-H Arylation of Alicyclic Amines** section.

Isolated as a colorless oil.

Isolated yield using modified standard conditions: 52%, 54%; 53% average yield

Isolated yield when based on recovered starting material: 61%, 59%; 60% average yield

IR (thin film): 1710 (br)  $\text{cm}^{-1}$

$^1\text{H}$  NMR (700 MHz,  $\text{CDCl}_3$ )  $\delta$  7.43 (d,  $J = 8.4$  Hz, 1H), 7.39 (d,  $J = 2.0$  Hz, 1H), 7.35 (d,  $J = 7.2$  Hz, 2H), 7.17 – 7.08 (multiple peaks, 3H), 7.00 (t,  $J = 7.4$  Hz, 1H), 6.25 (s, 1H), 3.28 (d,  $J = 9.2$  Hz, 1H), 3.15 (d,  $J = 9.6$  Hz, 1H), 3.10 (dd,  $J = 9.6, 3.9$  Hz, 1H), 3.04 (d,  $J = 9.2$  Hz, 1H), 2.42 (d,  $J = 8.5$  Hz, 1H), 2.21 (dd,  $J = 8.5, 3.7$  Hz, 1H), 1.16 (s, 3H), 1.10 (s, 3H).

$^{19}\text{F}$  NMR (377 MHz,  $\text{CDCl}_3$ )  $\delta$  -56.0 (t,  $J = 21.8$  Hz, 3F), -141.4 (m, 2F), -142.3 (m, 2F).

The carbon resonances corresponding to the perfluoroarene ( $C_7F_7$ ) in this compound appear as a complex series of multiplets between 105 ppm to 155 ppm as a result of  $^{13}C/^{19}F$  coupling. Due to the complexities of the system, the peaks are not listed.  $^{19}F$  NMR and HRMS were used to confirm the presence of this ring system.

$^{13}C$  NMR (176 MHz,  $CDCl_3$ )  $\delta$  175.2, 142.4, 137.0, 132.6, 130.5, 130.5, 129.0, 128.2, 127.6, 126.4, 126.3, 61.2, 49.8, 45.5, 35.0, 32.5, 28.1, 20.8, 20.6.

HRMS (ESI<sup>+</sup>)  $[M+H]^+$  Calcd for  $C_{28}H_{22}Cl_2F_7N_2O^+$ : 605.0997; Found: 605.0996.

$R_f$  = 0.60 in 20% EtOAc in hexanes

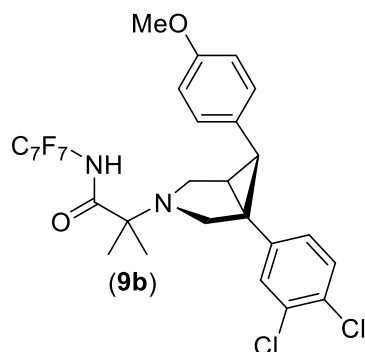

NOTE: The arylation reaction was conducted at 120 °C under air.

Isolated yield using modified standard conditions (using 1 equiv of Aryl-I): 40% yield

Isolated yield using modified standard conditions (using 20 equiv of Aryl-I): 50%, 51%; 51% average yield

Isolated yield when based on recovered starting material (using 20 equiv of Aryl-I): 77%, 69%; 73% average yield

MP 140-143 °C (white solid)

IR (thin film): 1707  $cm^{-1}$

$^1H$  NMR (700 MHz,  $CDCl_3$ )  $\delta$  7.41 (d,  $J$  = 8.3 Hz, 1H), 7.36 (d,  $J$  = 2.1 Hz, 1H), 7.25 (d,  $J$  = 8.4 Hz, 2H), 7.12 (dd,  $J$  = 8.3, 2.2 Hz, 1H), 6.61 (d,  $J$  = 8.4 Hz, 2H), 6.43 (s, 1H), 3.56 (s, 3H), 3.26 (d,  $J$  = 9.1 Hz, 1H), 3.16 – 3.09 (multiple peaks, 2H), 3.05 (d,  $J$  = 9.1 Hz, 1H), 2.36 (d,  $J$  = 8.4 Hz, 1H), 2.18 (dd,  $J$  = 8.5, 3.8 Hz, 1H), 1.20 (s, 3H), 1.18 (s, 3H).

$^{19}F$  NMR (377 MHz,  $CDCl_3$ )  $\delta$  -56.1 (t,  $J$  = 21 Hz, 3F), -141.4 (m, 2F), -143.0 (m, 2F).

The carbon resonances corresponding to the perfluoroarene ( $C_7F_7$ ) in this compound appear as a complex series of multiplets between 105 ppm to 155 ppm as a result of  $^{13}C/^{19}F$  coupling. Due to the complexities of the system, the peaks are not listed.  $^{19}F$  NMR and HRMS were used to confirm the presence of this ring system.

$^{13}C$  NMR (176 MHz,  $CDCl_3$ )  $\delta$  175.4, 157.8, 142.6, 132.6, 130.5, 130.4, 128.9, 128.6, 128.5, 126.2, 113.6, 61.2, 54.6, 49.8, 45.6, 35.0, 32.0, 28.2, 21.4, 20.4.

HRMS (ESI<sup>+</sup>)  $[M+H]^+$  Calcd for  $C_{29}H_{24}Cl_2F_7N_2O^+$ : 635.1103; Found: 635.1098.

$R_f$  = 0.60 in 20% EtOAc in hexanes

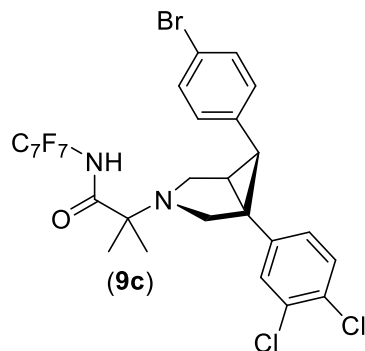

NOTE: The arylation reaction was conducted at 120 °C under air.

Isolated yield using modified standard conditions: 44%, 24%; 35% average yield

Isolated yield when based on recovered starting material: 54%, 27%; 41% average yield

MP 162-165 °C (white solid)

IR (thin film): 1709  $\text{cm}^{-1}$

$^1\text{H}$  NMR (700 MHz,  $\text{CDCl}_3$ )  $\delta$  7.43 (d,  $J$  = 8.3 Hz, 1H), 7.36 (d,  $J$  = 2.2 Hz, 1H), 7.27 (d,  $J$  = 8.4 Hz, 2H), 7.24 (d,  $J$  = 8.4 Hz, 2H), 7.12 (dd,  $J$  = 8.3, 2.2 Hz, 1H), 6.30 (s, 1H), 3.25 (d,  $J$  = 9.3 Hz, 1H), 3.12 (m, 2H), 3.06 (d,  $J$  = 9.3 Hz, 1H), 2.35 (d,  $J$  = 8.4 Hz, 1H), 2.25 (dd,  $J$  = 8.5, 3.8 Hz, 1H), 1.20 (s, 3H), 1.19 (s, 3H).

$^{19}\text{F}$  NMR (377 MHz,  $\text{CDCl}_3$ )  $\delta$  -56.2 (t,  $J$  = 21.8, Hz, 3F), -140.8 (m, 2F), -142.9 (dt,  $J$  = 13.7, 8.8 Hz, 2F).

The carbon resonances corresponding to the perfluoroarene ( $\text{C}_7\text{F}_7$ ) in this compound appear as a complex series of multiplets between 105 ppm to 155 ppm as a result of  $^{13}\text{C}/^{19}\text{F}$  coupling. Due to the complexities of the system, the peaks are not listed.  $^{19}\text{F}$  NMR and HRMS were used to confirm the presence of this ring system.

$^{13}\text{C}$  NMR (176 MHz,  $\text{CDCl}_3$ )  $\delta$  175.2, 141.9, 135.9, 132.7, 131.5, 130.7, 130.6, 129.4, 128.9, 126.2, 120.4, 61.2, 49.8, 45.6, 35.1, 32.0, 28.0, 21.4, 20.5.

HRMS (ESI $^+$ )  $[\text{M}+\text{H}]^+$  Calcd for  $\text{C}_{28}\text{H}_{21}\text{BrCl}_2\text{F}_7\text{N}_2\text{O}^+$ : 683.0103; Found: 683.0093.

$R_f$  = 0.52 in 20% EtOAc in hexanes

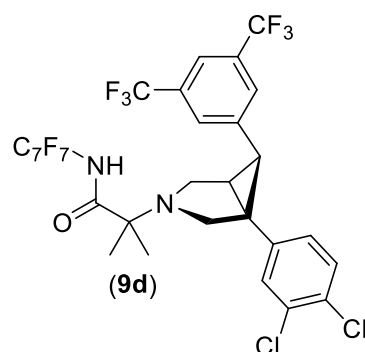

NOTE: The arylation reaction was conducted at 120 °C under air.  $\text{NaBH}_4$  reduction was required on this substrate following the **Isolation Procedure B** found on **Standard Conditions for C-H Arylation of Alicyclic Amines** section. Isolated as colorless oil.

Isolated yield using modified standard conditions: 33%, 34%, 46%, 33%; 37% average yield

Isolated yield when based on recovered starting material: 55%, 46%, 54%, 37%; 49% average yield

IR (thin film): 1717  $\text{cm}^{-1}$



$^1\text{H}$  NMR (700 MHz,  $\text{CDCl}_3$ )  $\delta$  7.80 (s, 2H), 7.63 (s, 1H), 7.46 (d,  $J = 8.3$  Hz, 1H), 7.38 (d,  $J = 2.2$  Hz, 1H), 7.15 (dd,  $J = 8.3, 2.2$  Hz, 1H), 6.01 (s, 1H), 3.28 (d,  $J = 9.7$  Hz, 1H), 3.19-3.09 (multiple peaks, 3H), 2.49 (d,  $J = 8.4$  Hz, 1H), 2.35 (dd,  $J = 8.5, 3.7$  Hz, 1H), 1.20 (s, 3H), 1.19 (s, 3H).

$^{19}\text{F}$  NMR (377 MHz,  $\text{CDCl}_3$ )  $\delta$  -56.2 (t,  $J = 21$  Hz, 3F), -63.5 (s, 6F), -141.2 (m, 2F), -143.5 (m, 2F).

The carbon resonances corresponding to the perfluoroarene ( $\text{C}_7\text{F}_7$ ) in this compound appear as a complex series of multiplets between 105 ppm to 155 ppm as a result of  $^{13}\text{C}/^{19}\text{F}$  coupling. Due to the complexities of the system, the peaks are not listed.  $^{19}\text{F}$  NMR and HRMS were used to confirm the presence of this ring system.

$^{13}\text{C}$  NMR (176 MHz,  $\text{CDCl}_3$ )  $\delta$  174.0, 140.9, 140.0, 132.9, 131.9 (q,  $J_{\text{C-F}} = 33$  Hz), 131.2, 130.7, 128.8, 127.9, 126.2, 122.8 (q,  $J_{\text{C-F}} = 273$  Hz), 120.2 (q,  $J_{\text{C-F}} = 3.9$  Hz), 61.4, 49.8, 45.5, 35.5, 31.7, 28.2, 20.8, 20.4.

HRMS (ESI $^+$ )  $[\text{M}+\text{H}]^+$  Calcd for  $\text{C}_{30}\text{H}_{20}\text{Cl}_2\text{F}_{13}\text{N}_2\text{O}^+$ : 741.0745; Found: 741.0744.

$R_f = 0.60$  in 20% EtOAc in hexanes

## V. Optimization and Scope of Alicyclic Amines for C-H Arylation

The conditions employed for the azabicyclo[3.1.0]hexane system provided a modest yield of 4-phenylpiperidine (**S5**). To increase both the conversion and selectivity, the reaction was re-optimized following the general procedure below.

A stock solution of Pd(OAc)<sub>2</sub> was prepared by dissolving 22.5 mg of Pd(OAc)<sub>2</sub> in 5 mL of dichloromethane (0.02 M solution of Pd(OAc)<sub>2</sub>). To a 4-mL vial a 150 µL aliquote of the Pd stock solution was added (0.7mg, 0.003 mmol, 10 mol%). The solvent was let to evaporate by heating the vial gently to 40 °C. After, substrate **10** (12 mg, 0.03 mmol, 1 equiv), CsOPiv (21 mg, 0.09 mmol, 3 equiv) and iodoarene (30 equiv) were added to the vial containing Pd. Finally, solvent was added if shown in entry of Table S4 (0.12 M). The vial was sealed with a teflon-lined cap and heated to the corresponding temperature for 18 hours. After the reaction mixture was removed from the heat source and hydrazine (50 µL, 65% in H<sub>2</sub>O, 0.6 mmol, 20 equiv) was added to the warm solution. The addition of hydrazine resulted in the precipitate of a black solid. A solution of internal standard (1,3,5-trimethoxybenzene, 168 mg in 5 mL of DCM) was prepared, and an aliquot (150 µL, 0.03 mmol) of the stock standard solution was added to the reaction vial. The reaction solution was then diluted with DCM to an approximate total volume of 4 mL. The solution was then filtered through a pipette packed with Celite and was analyzed by GC-FID. The average value of duplicate GC injections was used to determine the GC yield based on a linear calibration curve with 1,3,5-trimethoxybenzene.

A summary of the re-optimization is as follows:

**Table S4.** Re-optimization of the C-H arylation on piperidine.

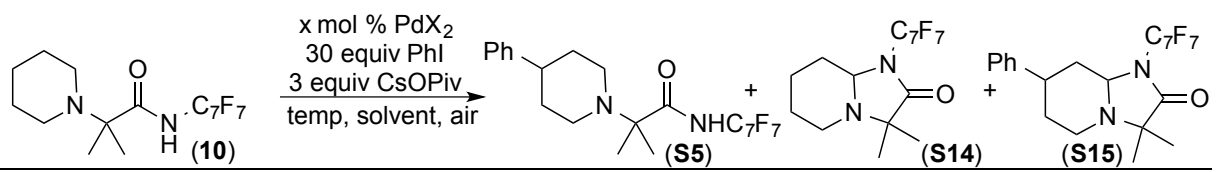

| entry    | Temp          | mol % Pd   | PdX <sub>2</sub>                  | solvent         | conversion | yield <b>S5</b> | yield <b>S14</b> | yield <b>S15</b> |
|----------|---------------|------------|-----------------------------------|-----------------|------------|-----------------|------------------|------------------|
| 1        | 140 °C        | 10%        | Pd(OAc) <sub>2</sub>              | <i>t</i> AmylOH | 54%        | 23%             | 14%              | 1%               |
| 2        | 140 °C        | 10%        | Pd(OAc) <sub>2</sub>              | HFIPA           | 86%        | 22%             | 18%              | 6%               |
| 3        | 140 °C        | 10%        | Pd(OAc) <sub>2</sub>              | <i>t</i> BuOH   | 63%        | 30%             | 13%              | 2%               |
| 4        | 140 °C        | 10%        | Pd(OAc) <sub>2</sub>              | TFE             | 79%        | 3%              | 26%              | 2%               |
| 5        | 140 °C        | 10%        | Pd(OAc) <sub>2</sub>              | xylene          | 60%        | 24%             | 14%              | 2%               |
| 6        | 140 °C        | 10%        | Pd(OAc) <sub>2</sub>              | none            | 77%        | 44%             | 16%              | 6%               |
| 7        | 130 °C        | 10%        | Pd(OAc) <sub>2</sub>              | none            | 56%        | 37%             | 12%              | 3%               |
| <b>8</b> | <b>150 °C</b> | <b>10%</b> | <b>Pd(OAc)<sub>2</sub></b>        | <b>none</b>     | <b>93%</b> | <b>44%</b>      | <b>28%</b>       | <b>11%</b>       |
| 9        | 150 °C        | 5%         | Pd(OAc) <sub>2</sub>              | none            | 82%        | 35%             | 24%              | 9%               |
| 10       | 150 °C        | 20%        | Pd(OAc) <sub>2</sub>              | none            | 96%        | 46%             | 17%              | 13%              |
| 11       | 150 °C        | 30%        | Pd(OAc) <sub>2</sub>              | none            | 89%        | 36%             | 13%              | 21%              |
| 12       | 150 °C        | 10%        | Pd(OPiv) <sub>2</sub>             | none            | 76%        | 44%             | 15%              | 6%               |
| 13       | 150 °C        | 10%        | Pd(OTFA) <sub>2</sub>             | none            | 74%        | 41%             | 14%              | 5%               |
| 14       | 150 °C        | 10%        | PdCl <sub>2</sub>                 | none            | 60%        | 29%             | 14%              | 3%               |
| 15       | 150 °C        | 10%        | Pdpy <sub>2</sub> Cl <sub>2</sub> | none            | 18%        | 10%             | 6%               | <1%              |

**Work-up to Effect Reduction of Aminal Products**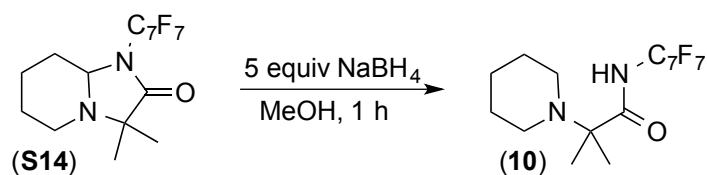

A solution of aminal (15 mg, 0.04 mmol) in MeOH (0.2 mL) was pre-cooled in an ice bath, and solid NaBH<sub>4</sub> (7.5 mg, 0.2 mmol, 5 equiv) was added in one portion. The solution was allowed to gradually warm to room temperature. After 1 h, the reaction was poured onto water, the resulting mixture was extracted with CH<sub>2</sub>Cl<sub>2</sub> (3 x ~10 mL), and the organic extracts were dried over Na<sub>2</sub>SO<sub>4</sub>, filtered, and concentrated under reduced pressure. Analysis of the crude oil by <sup>1</sup>H NMR, <sup>19</sup>F NMR, and GC-FID indicated full conversion of the aminal **S14** to the piperidine **10**.

## Standard Conditions for C-H Arylation of Alicyclic Amines

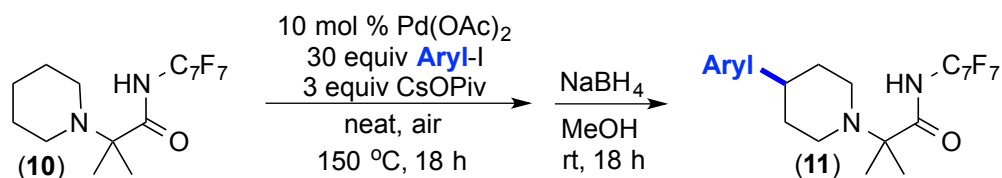

Under ambient conditions, a 20 mL scintillation vial was charged with solid substrate **10** (96.6 mg, 0.25 mmol, 1 equiv), Pd(OAc)<sub>2</sub> (5.6 mg, 0.0325 mmol, 10 mol %), cesium pivalate (176 mg, 0.75 mmol, 3 equiv), and iodoarene (30 equiv). The vial was sealed with a Teflon-lined cap and heated to an external temperature of 150 °C. After 24 h, the reaction was removed from the heat source and diluted with hexanes (5 mL). Hydrazine (250 μL, 35% in H<sub>2</sub>O, 2.6 mmol, 10 equiv) was added to the warm solution. The mixture was allowed to stir for 30 min at 60 °C to remove Pd from the product.

**Isolation Procedure A:** If aminoral (such as **S14**) is not formed during the reaction.

The mixture was filtered through a small plug of silica gel with 100% EtOAc. The resulting solution was concentrated under vacuum. Purification by column chromatography (25 g cartridge, gradient elution using Hex, EtOAc and/or THF) or preparative TLC afforded the desired product. Modifications to the procedure and chromatography conditions are noted under each substrate.

**Isolation Procedure B:** If aminoral (such as **S14**) is is formed during the reaction.

This mixture was loaded onto a small plug of silica gel over which hexanes (150 mL) was passed to remove iodoarene.<sup>2</sup> The plug of silica was then rinsed with EtOAc (150 mL) to elute the products, and this solution was concentrated under reduced pressure. The mixture of products was dissolved in MeOH (2 mL), and cooled in an ice bath to 0 °C. NaBH<sub>4</sub> (total 100 mg, 2.6 mmol, 20 equiv) was added portion-wise over 30 min. [*Caution: gas evolution occurs!*] The solution was allowed to warm to room temperature. After stirring for 12 h, the reaction was diluted with water and the resulting solution was extracted with CH<sub>2</sub>Cl<sub>2</sub>, dried (Na<sub>2</sub>SO<sub>4</sub>), and concentrated under reduced pressure. Purification by column chromatography (25 g cartridge, gradient elution using Hex, EtOAc and/or THF) or preparative TLC afforded the desired product. Modifications to the procedure and chromatography conditions are noted under each substrate.

<sup>2</sup> The hexanes solution was checked by TLC and GC to confirm that no product co-eluted with iodoarene.

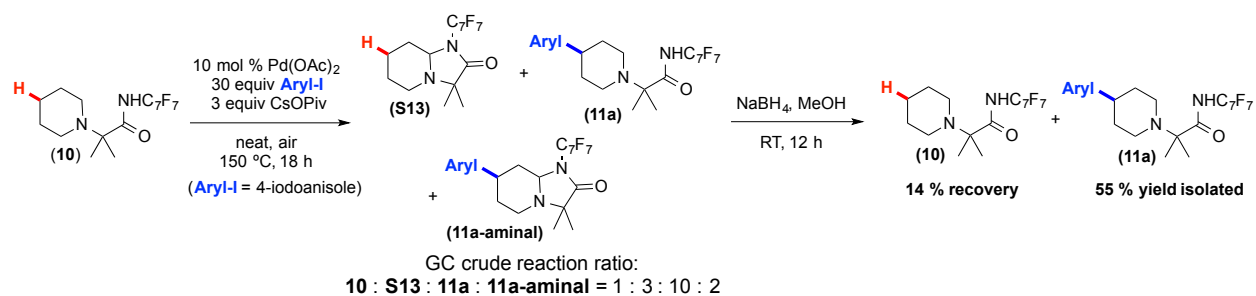

**Figure S2.** Crude reaction ratios of **10** before the reductive workup. Ratios are determined by gas chromatography (GC).

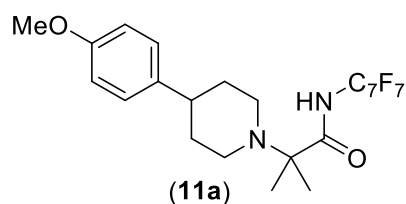

NOTE: Aminal formation was observed. NaBH<sub>4</sub> reduction was required on this substrate following **Isolation Procedure B**.

Isolated yield using standard conditions: 57%, 52%; 55% average yield

Isolated yield when calculated based on recovered starting material: 67%, 62%; 65% average yield

MP 121 °C (white solid)

IR (thin film): 1715 (br) cm<sup>-1</sup>

<sup>1</sup>H NMR (700 MHz, CDCl<sub>3</sub>) δ 9.45 (br s, 1H), 7.15 (m, 2H), 6.87 (m, 2H), 3.79 (s, 3H), 2.97 (dt, *J* = 11.3, 2.1 Hz, 2H), 2.53 (tt, *J* = 12.3, 3.8 Hz, 1H), 2.39 (td, *J* = 11.6, 2.2 Hz, 2H), 1.96 (d, *J* = 12.5 Hz, 2H), 1.75 (qd, *J* = 12.5, 3.6 Hz, 2H), 1.35 (s, 6H).

<sup>19</sup>F NMR (377 MHz, CDCl<sub>3</sub>) δ -56.0 (t, *J* = 21.8 Hz, 3F), -141.2 (m, 2F), -144.1 (m, 2F).

The carbon resonances corresponding to the perfluoroarene (C<sub>7</sub>F<sub>7</sub>) in this compound appear as a complex series of multiplets between 105 ppm to 155 ppm as a result of <sup>13</sup>C/<sup>19</sup>F coupling. Due to the complexities of the system, the peaks are not listed. <sup>19</sup>F NMR and HRMS were used to confirm the presence of this ring system.

<sup>13</sup>C NMR (176 MHz, CDCl<sub>3</sub>) δ 175.6, 158.0, 137.7, 127.5, 113.8, 64.8, 55.2, 47.8, 41.7, 34.3, 20.5.

HRMS (ESI<sup>+</sup>) [M+H]<sup>+</sup> Calcd for C<sub>23</sub>H<sub>24</sub>F<sub>7</sub>N<sub>2</sub>O<sub>2</sub><sup>+</sup>: 493.1726; Found: 493.1718.

*R<sub>f</sub>* = 0.50 in 20% EtOAc in hexanes

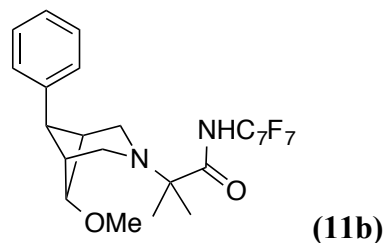

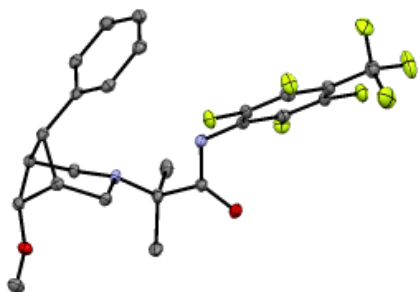

NOTE: The arylation reaction was conducted at 100 °C for 16 h. Amino acid was not observed, thus purification was performed following **Isolation Procedure A**.

A mixture of starting material and product were isolated from the initial column chromatography (10% THF in hexanes). Then, the mixture of product and recovered starting material were subjected to a preparative TLC (5% THF in hexanes, plate was run four times).

Isolated yield: 62% yield.

MP 101-103 °C (white solid)

IR (thin film): 1712  $\text{cm}^{-1}$

$^1\text{H}$  NMR (500 MHz,  $\text{CDCl}_3$ )  $\delta$  7.23 (d,  $J = 7.5$  Hz, 2H), 7.12 (t,  $J = 7.5$  Hz, 2H), 6.96 (t,  $J = 7.5$  Hz, 1H), 6.75 (s, 1H), 3.60 (t,  $J = 5.5$  Hz, 1H), 3.38 (s, 3H), 3.08-2.96 (multiple peaks, 7H), 1.19 (s, 6H).

$^{19}\text{F}$  NMR (471 MHz,  $\text{CDCl}_3$ )  $\delta$  -56.1 (t,  $J = 23.6$  Hz, 3F), -141.8 (m, 2F), -142.3 (m, 2F).

The carbon resonances corresponding to the perfluoroarene ( $\text{C}_7\text{F}_7$ ) in this compound appear as a complex series of multiplets between 105 ppm to 155 ppm as a result of  $^{13}\text{C}/^{19}\text{F}$  coupling. Due to the complexities of the system, the peaks are not listed.  $^{19}\text{F}$  NMR and HRMS were used to confirm the presence of this ring system.

$^{13}\text{C}$  NMR (126 MHz,  $\text{CDCl}_3$ )  $\delta$  176.3, 140.9, 128.2, 125.5, 125.1, 72.9, 63.2, 55.8, 39.8, 39.6, 34.7, 21.1.

HRMS (ESI $^+$ )  $[\text{M}+\text{H}]^+$  Calcd for  $\text{C}_{24}\text{H}_{24}\text{F}_7\text{N}_2\text{O}_2$ : 505.1721; Found: 505.1721.

$R_f = 0.12$  in 5% THF in hexanes

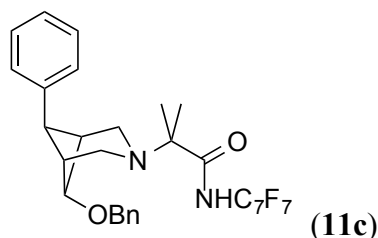

NOTE: The arylation reaction was conducted at 120 °C for 16 h. Amino acid formation was observed.  $\text{NaBH}_4$  reduction was required on this substrate following **Isolation Procedure B**. Purification via column chromatography (10 g cartridge, gradient elution from 0% to 5% THF in hexanes) afforded a colorless oil. This oil was diluted with a small amount of methanol (~0.3 mL). Slow evaporation at RT of the methanol to about 0.15 mL yielded pure product as a white solid. The supernatant was removed by decantation.

Isolated yield: 66% yield.

MP 114-116 °C (white solid)

IR (thin film): 1690  $\text{cm}^{-1}$

$^1\text{H}$  NMR (700 MHz,  $\text{CDCl}_3$ )  $\delta$  7.37 (app d,  $J = 7.7$  Hz, 2H), 7.34 (t,  $J = 7.7$  Hz, 2H), 7.28 (t,  $J = 7.7$  Hz, 1H), 7.22 (app d,  $J = 7.7$  Hz, 2H), 7.14 (t,  $J = 7.7$  Hz, 2H), 6.99 (t,  $J = 7$  Hz, 1H), 6.90 (br s, 1H), 4.57 (s, 2H), 3.83 (t,  $J = 5.6$  Hz, 1H), 3.16 (d,  $J = 9.8$  Hz, 2H), 3.10 (m, 2H), 3.04 (app d,  $J = 9.1$  Hz, 2H), 2.99 (t,  $J = 5.6$  Hz, 1H), 1.16 (s, 6H).

$^{19}\text{F}$  NMR (377 MHz,  $\text{CDCl}_3$ )  $\delta$  -56.11 (t,  $J = 21.5$  Hz, 3F), -141.87 (m, 2F), -142.38 (m, 2F).

The carbon resonances corresponding to the perfluoroarene ( $\text{C}_7\text{F}_7$ ) in this compound appear as a complex series of multiplets between 105 ppm to 155 ppm as a result of  $^{13}\text{C}/^{19}\text{F}$  coupling. Due to the complexities of the system, the peaks are not listed.  $^{19}\text{F}$  NMR and HRMS were used to confirm the presence of this ring system.

$^{13}\text{C}$  NMR (176 MHz,  $\text{CDCl}_3$ )  $\delta$  176.4, 140.6, 137.8, 128.6, 128.2, 128.0, 127.9, 125.6, 125.2, 71.6, 70.8, 63.2, 40.12, 40.11, 34.9, 21.5

HRMS (ESI $^+$ )  $[\text{M}+\text{H}]^+$  Calcd for  $\text{C}_{30}\text{H}_{28}\text{F}_7\text{N}_2\text{O}_2$ : 581.2034; Found: 581.2034.

$R_f = 0.19$  in 5% THF in hexanes

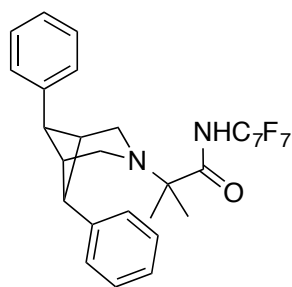

(11d)

NOTE: The arylation reaction was conducted at 100  $^\circ\text{C}$ . Aminal was not observed, thus purification was performed following **Isolation Procedure A**. No starting material was recovered from this reaction.

Isolated yield using standard conditions: 35%, 34%; 35% average yield

MP 152-156  $^\circ\text{C}$  (white solid)

IR (thin film): 1715  $\text{cm}^{-1}$

$^1\text{H}$  NMR (700 MHz,  $\text{CDCl}_3$ )  $\delta$  7.27 (m, 4H), 7.20 (d,  $J = 7.4$  Hz, 4H), 7.10 (t,  $J = 7.4$  Hz, 2H), 6.48 (s, 1H), 3.48 (m, 2H), 3.40 (m, 2H), 3.11 (m, 4H), 0.76 (s, 6H).

$^{19}\text{F}$  NMR (377 MHz,  $\text{CDCl}_3$ )  $\delta$  -56.1 (t,  $J = 21.8$  Hz, 3F), -141.8 (m, 2F), -142.5 (m, 2F).

The carbon resonances corresponding to the perfluoroarene ( $\text{C}_7\text{F}_7$ ) in this compound appear as a complex series of multiplets between 105 ppm to 155 ppm as a result of  $^{13}\text{C}/^{19}\text{F}$  coupling. Due to the complexities of the system, the peaks are not listed.  $^{19}\text{F}$  NMR and HRMS were used to confirm the presence of this ring system.

$^{13}\text{C}$  NMR (176 MHz,  $\text{CDCl}_3$ )  $\delta$  175.7, 128.3, 128.3, 126.3, 125.6, 62.9, 40.9, 40.1, 38.0, 20.2.

HRMS (ESI $^+$ )  $[\text{M}+\text{H}]^+$  Calcd for  $\text{C}_{29}\text{H}_{26}\text{F}_7\text{N}_2\text{O}^+$ : 551.1933; Found: 551.1926.

$R_f = 0.80$  in 20% EtOAc in hexanes

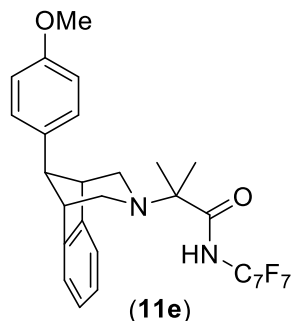

NOTE: Aminoal formation was observed. NaBH<sub>4</sub> reduction was required on this substrate following **Isolation Procedure B**.

Isolated yield using standard conditions: 47%, 45%; 46% average yield

Isolated yield when based on recovered starting material: 66%, 75%; 71% average yield

MP 161-164 °C (white solid)

IR (thin film): 1713 cm<sup>-1</sup>

<sup>1</sup>H NMR (700 MHz, CDCl<sub>3</sub>) δ 7.47 (br s, 1H), 7.31-7.22 (multiple peaks, 4H), 7.13 (dd, *J* = 5.3, 3.1 Hz, 2H), 6.96 (m, 2H), 3.84 (s, 3H), 3.69 (t, *J* = 4.2 Hz, 2H), 3.58 (t, *J* = 4.4 Hz, 1H), 3.01 (d, *J* = 10.8 Hz, 2H), 2.56 (dd, *J* = 11.0, 4.2 Hz, 2H), 1.04 (s, 6H).

<sup>19</sup>F NMR (377 MHz, CDCl<sub>3</sub>) δ -56.0 (t, *J* = 21.8 Hz, 3F), -141.5 (m, 2F), -142.9 (m, 2F).

The carbon resonances corresponding to the perfluoroarene (C<sub>7</sub>F<sub>7</sub>) in this compound appear as a complex series of multiplets between 105 ppm to 155 ppm as a result of <sup>13</sup>C/<sup>19</sup>F coupling. Due to the complexities of the system, the peaks are not listed. <sup>19</sup>F NMR and HRMS were used to confirm the presence of this ring system.

<sup>13</sup>C NMR (176 MHz, CDCl<sub>3</sub>) δ 176.0, 157.6, 146.2, 130.8, 129.2, 126.7, 121.7, 114.2, 63.5, 55.2, 51.0, 43.6, 42.6, 21.4.

HRMS (ESI<sup>+</sup>) [M+H]<sup>+</sup> Calcd for C<sub>27</sub>H<sub>26</sub>F<sub>7</sub>N<sub>2</sub>O<sub>2</sub><sup>+</sup>: 567.1882; Found: 567.1874.

*R*<sub>f</sub> = 0.50 in 20% EtOAc in hexanes

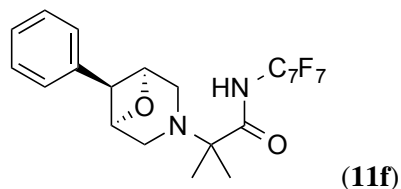

Note: The arylation reaction was conducted at 95 °C. Aminoal was not observed, thus purification was performed following **Isolation Procedure A**.

Isolated yield using standard conditions: 32%, 34%; 33% average yield

Isolated yield when calculated based on recovered starting material: 69%, 74%; 72% average yield

MP 202 °C (white solid)

IR (thin film): 1713 cm<sup>-1</sup>

<sup>1</sup>H NMR (700 MHz, CDCl<sub>3</sub>) δ 7.12 (t, *J* = 7.7 Hz, 2H), 7.05 (d, *J* = 7.7 Hz, 2H), 7.00 (t, *J* = 7.7 Hz, 1H), 6.42 (s, 1H), 4.95 (d, *J* = 6.1 Hz, 2H), 4.60 (t, *J* = 6.3 Hz, 1H), 3.19 (d, *J* = 11.6 Hz, 2H), 3.09 (d, 11.4 Hz, 2H), 1.23 (s, 6H).

<sup>19</sup>F NMR (377 MHz, CDCl<sub>3</sub>) δ -56.1 (t, *J* = 21.8 Hz, 3F), -141.4 (m, 2F), -142.5 (m, 2F).



The carbon resonances corresponding to the perfluoroarene (C<sub>7</sub>F<sub>7</sub>) in this compound appear as a complex series of multiplets between 105 ppm to 155 ppm as a result of <sup>13</sup>C/<sup>19</sup>F coupling. Due to the complexities of the system, the peaks are not listed. <sup>19</sup>F NMR and HRMS were used to confirm the presence of this ring system.

<sup>13</sup>C NMR (176 MHz, CDCl<sub>3</sub>) δ 175.2, 139.2, 128.3, 126.1, 123.8, 81.4, 63.0, 45.8, 44.7, 20.5.

HRMS (ESI<sup>+</sup>) [M+H]<sup>+</sup> Calcd for C<sub>22</sub>H<sub>20</sub>F<sub>7</sub>N<sub>2</sub>O<sub>2</sub><sup>+</sup>: 477.1413; Found: 477.1505.

R<sub>f</sub> = 0.38 in 35% EtOAc in hexanes

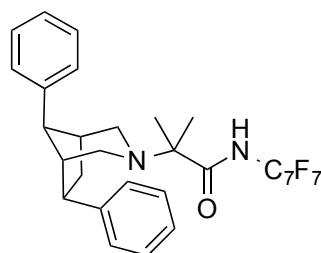

(11g)

NOTE: The reaction was performed at a larger scale (0.4 mmol of substrate), and was conducted at 145 °C in *t*-amylOH (0.13 M in substrate). Aminal formation was observed. NaBH<sub>4</sub> reduction was required on this substrate following a modified **Isolation Procedure B** where iodobenzene was removed under vacuum instead of via filtration through silica gel plug.

The yield for compound **11g** was determined by isolating a mixture of recovered starting material **S11** and compound **11g** via column chromatography (2% THF in hexanes). The mixture was analyzed by <sup>1</sup>H NMR spectroscopy to determine the ratio of **S11**:**11g** (ca. 0.23:1). This ratio, in combination with the isolated mass of the mixture and the respective molecular masses, was used to determine a yield of **11g** based on the mixture. Pure **11g** was obtained after repeated chromatography (2% THF in hexanes). An excerpt of the NMR used to determine the ratio is below:

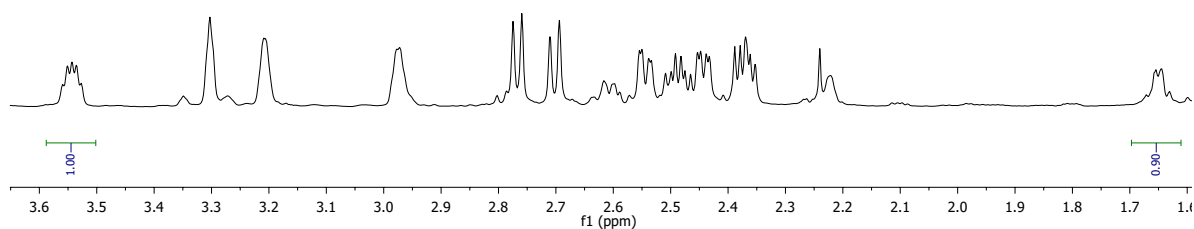

Yield: 34% yield

MP 142-144 °C (white solid)

IR (thin film): 1716 cm<sup>-1</sup>

<sup>1</sup>H NMR (700 MHz, CDCl<sub>3</sub>) δ 7.83 (s, 1H), 7.41-7.38 (multiple peaks, 4H), 7.34 (app d, *J* = 8.4 Hz, 2H), 7.23 (t, *J* = 7.7 Hz, 1H), 7.16 (t, *J* = 7.7 Hz, 2H), 6.75 (t, *J* = 7.7 Hz, 1H), 3.58 (quintet, *J* = 5.6 Hz, 1H), 3.34 (br s, 1H), 3.25 (br s, 1H), 3.01 (m, 1H), 2.80 (d, *J* = 10.5 Hz, 1H), 2.73 (d, *J* = 12.6 Hz, 1H), 2.58 (dd, *J* = 3.5, 11.2 Hz, 1H), 2.53 (m, 1H), 2.48 (dd, *J* = 4.2, 11.2 Hz, 1H), 2.41 (dd, *J* = 7, 5.6 Hz, 1H), 1.01 (s, 3H), 0.77 (s, 3H).

<sup>19</sup>F NMR (377 MHz, CDCl<sub>3</sub>) δ -56.0 (t, *J* = 22.6 Hz, 3F), -142.1 (m, 2H), -143.2 (m, 2H).

The carbon resonances corresponding to the perfluoroarene (C<sub>7</sub>F<sub>7</sub>) in this compound appear as a complex series of multiplets between 105 ppm to 155 ppm as a result of <sup>13</sup>C/<sup>19</sup>F coupling. Due to the complexities of the system, the peaks are not listed. <sup>19</sup>F NMR and HRMS were used to confirm the presence of this ring system.

<sup>13</sup>C NMR (176 MHz, CDCl<sub>3</sub>) δ 175.3, 143.4, 139.6, 128.92, 128.86, 128.6, 127.2, 126.0, 125.1, 63.9, 47.6, 46.9, 44.9, 41.5, 40.0, 36.4, 32.4, 22.5, 18.3.

HRMS (ESI<sup>+</sup>) [M+H]<sup>+</sup> Calcd for C<sub>30</sub>H<sub>28</sub>F<sub>7</sub>N<sub>2</sub>O: 565.2084; Found: 565.2089.

R<sub>f</sub> = 0.10 in 2% THF in hexanes

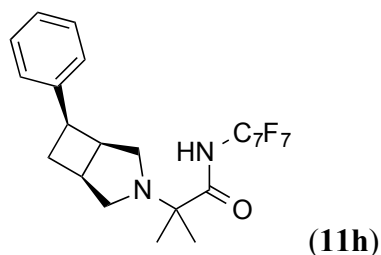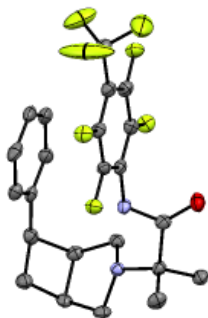

NOTE: The arylation reaction was conducted at 130 °C in *t*-AmylOH (0.12 M in substrate).  
Aminal was not observed, thus purification was performed following **Isolation Procedure A**.

Isolated yield using standard conditions: 54% yield

Isolated yield when calculated based on recovered starting material: 57% yield

MP 138-140 °C (white solid)

IR (thin film): 1708 cm<sup>-1</sup>

<sup>1</sup>H NMR (500 MHz, CDCl<sub>3</sub>) δ 8.28 (br s, 1H), 7.08 (multiple peaks, 4H), 6.64 (m, 1H), 3.79 (q, *J* = 9.5 Hz, 1H), 3.26 (q, *J* = 8 Hz, 1H), 2.97 (m, 1H), 2.76 (dd, *J* = 15, 10 Hz, 2H), 2.61 (m, 1H), 2.42 (dd, *J* = 9, 5.5 Hz, 1H), 2.35 (dd, *J* = 10, 7 Hz, 1H), 2.25 (m, 1H), 1.31 (s, 3H), 1.14 (s, 3H).

<sup>19</sup>F NMR (471 MHz, CDCl<sub>3</sub>) δ -56.0 (t, *J* = 22.1 Hz, 3F), -142.1 (m, 2F), -143.5 (m, 2F).

The carbon resonances corresponding to the perfluoroarene (C<sub>7</sub>F<sub>7</sub>) in this compound appear as a complex series of multiplets between 105 ppm to 155 ppm as a result of <sup>13</sup>C/<sup>19</sup>F coupling. Due to the complexities of the system, the peaks are not listed. <sup>19</sup>F NMR and HRMS were used to confirm the presence of this ring system.

<sup>13</sup>C NMR (126 MHz, CDCl<sub>3</sub>) δ 175.3, 142.3, 128.1, 126.7, 124.8, 61.3, 53.0, 48.0, 41.5, 36.5, 32.9, 28.9, 25.1, 16.8.

HRMS (ESI<sup>+</sup>) [M+H]<sup>+</sup> Calcd for C<sub>23</sub>H<sub>22</sub>F<sub>7</sub>N<sub>2</sub>O: 475.1615; Found: 475.1612.

R<sub>f</sub> = 0.21 in 5% THF in hexanes

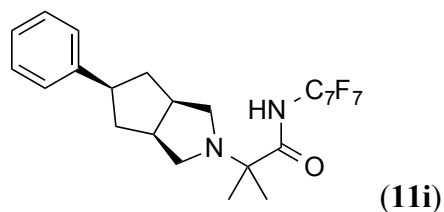

NOTE: Aminal formation was observed. NaBH<sub>4</sub> reduction was required on this substrate following **Isolation Procedure B**. Purification via preparative TLC (5% THF in hexanes).

Isolated yield: 44% yield.

MP 93-95 °C (white solid)

IR (thin film): 1722 cm<sup>-1</sup>

<sup>1</sup>H NMR (500 MHz, CDCl<sub>3</sub>) δ 9.36 (br s, 1H), 7.31-7.18 (multiple peaks, 5H), 3.01 (app septet, *J* = 5.5 Hz, 1 H), 2.71-2.59 (multiple peaks, 6H), 2.42 (m, 2H), 1.49 (m, 2H), 1.37 (s, 6H).

<sup>19</sup>F NMR (471 MHz, CDCl<sub>3</sub>) δ -56.02 (t, *J* = 18.8 Hz, 3F), -141.10 (m, 2F), -143.77 (m, 2F).

The carbon resonances corresponding to the perfluoroarene (C<sub>7</sub>F<sub>7</sub>) in this compound appear as a complex series of multiplets between 105 ppm to 155 ppm as a result of <sup>13</sup>C/<sup>19</sup>F coupling. Due to the complexities of the system, the peaks are not listed. <sup>19</sup>F NMR and HRMS were used to confirm the presence of this ring system.

<sup>13</sup>C NMR (126 MHz, CDCl<sub>3</sub>) δ 175.3, 143.8, 128.5, 127.0, 126.3, 61.7, 53.2, 46.9, 41.7, 41.5, 21.1.

HRMS (ESI<sup>+</sup>) [M+H]<sup>+</sup> Calcd for C<sub>24</sub>H<sub>24</sub>F<sub>7</sub>N<sub>2</sub>O: 489.1771; Found: 489.1772.

*R<sub>f</sub>* = 0.13 in 5% THF in hexanes

## VI. Diversification of varenicline core via transannular C–H arylation

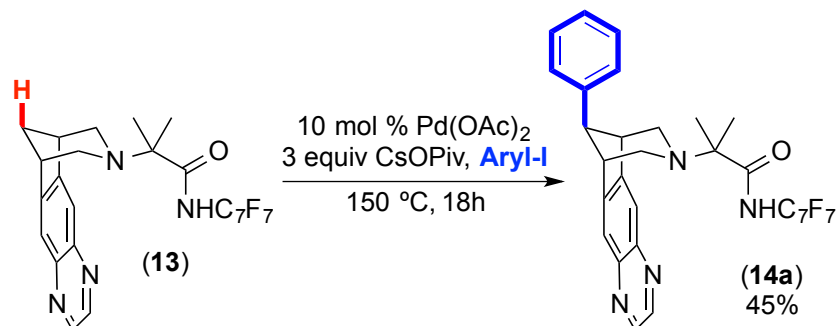

Example given for Aryl-I = PhI: Under ambient conditions, a 20 mL scintillation vial was charged with solid substrate **13** (77 mg, 0.15 mmol, 1 equiv), Pd(OAc)<sub>2</sub> (3.5 mg, 0.01 mmol, 10 mol %), cesium pivalate (105 mg, 0.45 mmol, 3 equiv), and iododobenzene (0.55 mL, 5.3 mmol, 30 equiv). The vial was sealed with a Teflon-lined cap and heated to an external temperature of 150 °C. After 24 h, the reaction was removed from the heat source and diluted with hexanes (5 mL). Hydrazine (300 μL, 35% in H<sub>2</sub>O, 1.5 mmol, 20 equiv) was added to the warm solution. The mixture was allowed to stir for 60 min at 60 °C to remove Pd from the product. This solution was loaded onto a small plug of silica gel over which hexanes (150 mL) was passed to remove iodoarene.<sup>3</sup> The plug of silica was then rinsed with EtOAc (150 mL) to elute the product, and this solution was concentrated under reduced pressure. Purification by column chromatography (25 g cartridge, gradient elution from 0% to 40% EtOAc in hexanes) afforded recovered starting material (26 mg) along with the desired product (45 mg, 51%, 77% BRSM).

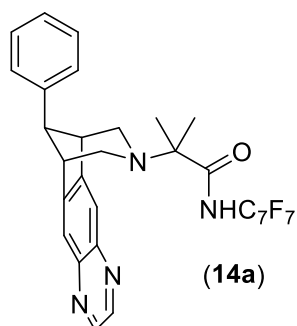

<sup>3</sup> The hexanes solution was checked by TLC to confirm that no product co-eluted with iodoarene.

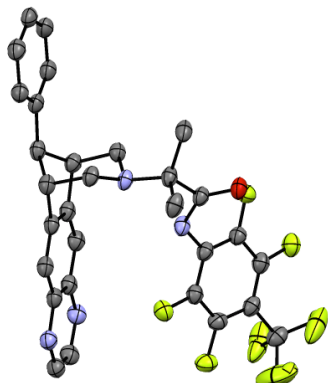

Isolated yield using modified standard conditions: 41%, 55%, 44%; 45% average yield  
 Isolated yield when calculated based on recovered starting material: 63%, 77%, 61%; 67% average yield

MP 203-205 °C (white solid)

IR (thin film): 1721  $\text{cm}^{-1}$

$^1\text{H}$  NMR (700 MHz,  $\text{CDCl}_3$ )  $\delta$  8.76 (s, 2H), 7.93 (s, 2H), 7.46 (t,  $J = 7.6$  Hz, 2H), 7.40-7.35 (multiple peaks, 3H), 7.30 (m, 1H), 4.03 (t,  $J = 4.3$  Hz, 2H), 3.77 (m, 1H), 3.17 (d,  $J = 11.0$  Hz, 2H), 2.76 (dd,  $J = 11.2, 4.2$  Hz, 2H), 1.02 (s, 6H).

$^{19}\text{F}$  NMR (377 MHz,  $\text{CDCl}_3$ )  $\delta$  -56.0 (t,  $J = 21.6$  Hz, 3F), -141.4 (m, 2F), -144.4 (m, 2F).

The carbon resonances corresponding to the perfluoroarene ( $\text{C}_7\text{F}_7$ ) in this compound appear as a complex series of multiplets between 105 ppm to 155 ppm as a result of  $^{13}\text{C}/^{19}\text{F}$  coupling. Due to the complexities of the system, the peaks are not listed.  $^{19}\text{F}$  NMR and HRMS were used to confirm the presence of this ring system.

$^{13}\text{C}$  NMR (176 MHz,  $\text{CDCl}_3$ )  $\delta$  174.8, 149.9, 144.1, 143.0, 138.0, 129.1, 128.2, 126.5, 121.1, 63.8, 51.4, 44.9, 42.5, 21.2.

HRMS (ESI $^+$ )  $[\text{M}+\text{H}]^+$  Calcd for  $\text{C}_{30}\text{H}_{24}\text{F}_7\text{N}_4\text{O}^+$ : 589.1838; Found: 589.1830.

$R_f = 0.60$  in 50% EtOAc in hexanes

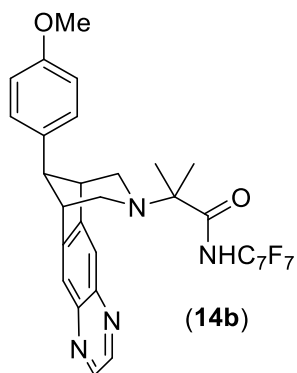

The yield for compound **14b** was determined by isolating a mixture of recovered starting material **13** and compound **14b** from the column chromatography. The mixture was analyzed by  $^1\text{H}$  NMR spectroscopy to determine the ratio of **13**:**14b** (ca. 2:1.6 depending on sample). This ratio, in combination with the isolated mass of the mixture and the respective molecular masses, was used to determine a yield of **14b** based on the mixture. Pure **14b** was isolated after repeated chromatography. An excerpt of the NMR spectrum used to determine the ratio is below:

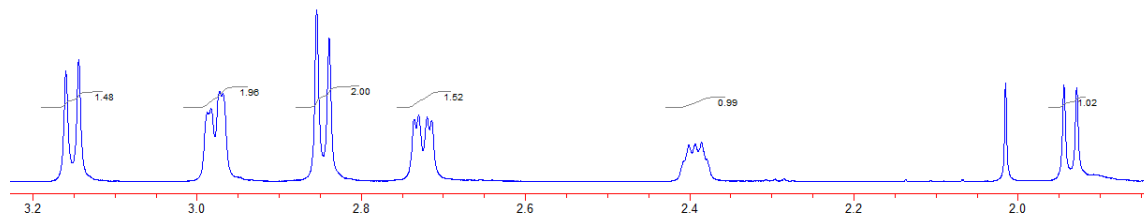

Yield: 41%, 38%; 40% average yield

Yield calculated based on recovered starting material: 80%, 70%; 75% average yield

MP 161-164 °C (white solid)

$^1\text{H}$  NMR (700 MHz,  $\text{CDCl}_3$ )  $\delta$  8.75 (s, 2H), 7.91 (s, 2H), 7.36 (s, 1H), 7.28 (m, 2H), 6.99 (m, 2H), 3.97 (t,  $J = 4.2$  Hz, 2H), 3.86 (s, 3H), 3.71 (m, 1H), 3.17 (d,  $J = 11.0$  Hz, 2H), 2.74 (dd,  $J = 11.1, 4.1$  Hz, 2H), 1.03 (s, 6H).

$^{19}\text{F}$  NMR (377 MHz,  $\text{CDCl}_3$ )  $\delta$  -56.1 (t,  $J = 21.7$  Hz, 3F), -141.4 (qd,  $J = 21.7, 12.6$  Hz, 2F), -144.3 (m, 2F).

The carbon resonances corresponding to the perfluoroarene ( $\text{C}_7\text{F}_7$ ) in this compound appear as a complex series of multiplets between 105 ppm to 155 ppm as a result of  $^{13}\text{C}/^{19}\text{F}$  coupling. Due to the complexities of the system, the peaks are not listed.  $^{19}\text{F}$  NMR and HRMS were used to confirm the presence of this ring system.

$^{13}\text{C}$  NMR (176 MHz,  $\text{CDCl}_3$ )  $\delta$  174.8, 157.9, 150.0, 144.0, 143.1, 129.9, 129.2, 121.1, 114.5, 63.8, 55.2, 50.7, 44.8, 42.7, 21.2.

HRMS (ESI $^+$ )  $[\text{M}+\text{H}]^+$  Calcd for  $\text{C}_{31}\text{H}_{26}\text{F}_7\text{N}_4\text{O}_2^+$ : 619.1944; Found: 619.1936.

$R_f = 0.50$  in 50% EtOAc in hexanes

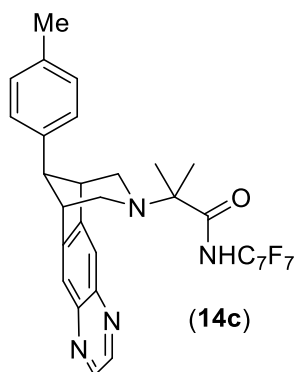

Isolated yield using modified standard conditions: 41%, 43%; 42% average yield

Isolated yield when calculated based on recovered starting material: 55%, 53%; 54% average yield

MP 239-244 °C (light brown solid)

IR (thin film): 1721  $\text{cm}^{-1}$

$^1\text{H}$  NMR (700 MHz,  $\text{CDCl}_3$ )  $\delta$  8.75 (s, 2H), 7.91 (s, 2H), 7.37 (s, 1H), 7.26 (s, 4H), 3.99 (t,  $J = 4.3$  Hz, 2H), 3.72 (t,  $J = 4.3$  Hz, 1H), 3.17 (d,  $J = 11.0$  Hz, 2H), 2.75 (dd,  $J = 11.2, 4.2$  Hz, 2H), 2.39 (s, 3H), 1.03 (s, 6H).

$^{19}\text{F}$  NMR (377 MHz,  $\text{CDCl}_3$ )  $\delta$  -56.1 (t,  $J = 21.6$  Hz, 3F), -141.4 (m, 2F), -144.3 (m, 2F).

The carbon resonances corresponding to the perfluoroarene ( $\text{C}_7\text{F}_7$ ) in this compound appear as a complex series of multiplets between 105 ppm to 155 ppm as a result of  $^{13}\text{C}/^{19}\text{F}$  coupling. Due to

the complexities of the system, the peaks are not listed.  $^{19}\text{F}$  NMR and HRMS were used to confirm the presence of this ring system.

$^{13}\text{C}$  NMR (176 MHz,  $\text{CDCl}_3$ )  $\delta$  174.9, 150.0, 144.0, 143.0, 136.0, 134.8, 129.7, 128.0, 121.1, 63.8, 51.1, 44.8, 42.6, 21.2, 21.0.

HRMS (ESI<sup>+</sup>) [ $\text{M}+\text{H}$ ]<sup>+</sup> Calcd for  $\text{C}_{31}\text{H}_{26}\text{F}_7\text{N}_4\text{O}^+$ : 603.1995; Found: 603.1989.

$R_f$  = 0.65 in 50% EtOAc in hexanes

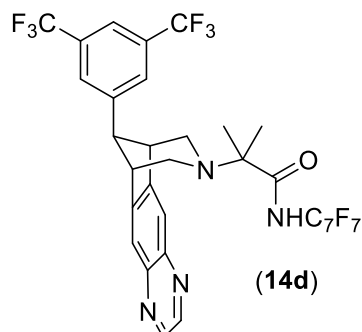

NOTE: This reaction was conducted at 140 °C using 20 mol %  $\text{Pd}(\text{OAc})_2$ , 3 equiv  $\text{AgOAc}$ , and 3 equiv  $\text{KO}i\text{Pr}$  per general conditions B for the azabicyclo[3.1.0]hexane system.

Isolated yield using modified standard conditions: 36%, 39%, 34%; 37% average yield

Isolated yield when calculated based on recovered starting material: 51%, 46%, 53%; 50% average yield

MP >250 °C (dec.) (white solid)

IR (thin film): 1715  $\text{cm}^{-1}$

$^1\text{H}$  NMR (700 MHz,  $\text{CDCl}_3$ )  $\delta$  8.77 (s, 2H), 7.96 (s, 2H), 7.86 (s, 1H), 7.84 (s, 2H), 7.18 (s, 1H), 4.13 (t,  $J$  = 4.2 Hz, 2H), 3.85 (bs, 1H), 3.02 (d,  $J$  = 11.4 Hz, 2H), 2.87 (dd,  $J$  = 11.6, 4.2 Hz, 2H), 1.05 (s, 6H).

$^{19}\text{F}$  NMR (377 MHz,  $\text{CDCl}_3$ )  $\delta$  -56.1 (t,  $J$  = 21.7 Hz, 3F), -62.8 (s, 6F), -141.2 (m, 2F), -144.4 (m, 2F).

The carbon resonances corresponding to the perfluoroarene ( $\text{C}_7\text{F}_7$ ) in this compound appear as a complex series of multiplets between 105 ppm to 155 ppm as a result of  $^{13}\text{C}/^{19}\text{F}$  coupling. Due to the complexities of the system, the peaks are not listed.  $^{19}\text{F}$  NMR and HRMS were used to confirm the presence of this ring system.

$^{13}\text{C}$  NMR (176 MHz,  $\text{CDCl}_3$ )  $\delta$  174.3, 148.5, 144.4, 143.1, 140.9, 132.5 (q,  $J_{\text{C-F}}$  = 33 Hz), 128.6 (q,  $J_{\text{C-F}}$  = 4.0 Hz), 123.1 (q,  $J_{\text{C-F}}$  = 273 Hz), 121.5, 120.7 (q,  $J_{\text{C-F}}$  = 4.0 Hz), 63.8, 51.1, 44.8, 42.3, 21.1.

HRMS (ESI<sup>+</sup>) [ $\text{M}+\text{H}$ ]<sup>+</sup> Calcd for  $\text{C}_{32}\text{H}_{22}\text{F}_{13}\text{N}_4\text{O}^+$ : 725.1586; Found: 725.1575.

$R_f$  = 0.70 in 50% EtOAc in hexanes

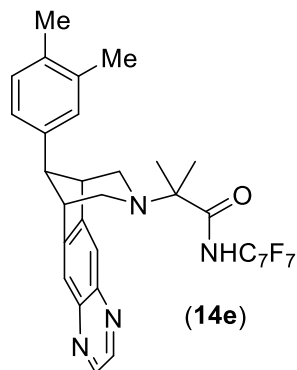

Isolated yield using modified standard conditions: 44%, 42%; 43% average yield

Isolated yield when calculated based on recovered starting material: 78%, 74%; 76% average yield

MP 228-231 °C (brown solid)

IR (thin film): 1714  $\text{cm}^{-1}$

$^1\text{H}$  NMR (700 MHz,  $\text{CDCl}_3$ )  $\delta$  8.75 (s, 2H), 7.91 (s, 2H), 7.37 (s, 1H), 7.20 (d,  $J = 7.7$  Hz, 1H), 7.13 (s, 1H), 7.09 (d,  $J = 7.7$  Hz, 1H), 4.00 (t,  $J = 4.3$  Hz, 2H), 3.70 (m, 1H), 3.18 (d,  $J = 10.9$  Hz, 2H), 2.75 (dd,  $J = 11.1, 4.2$  Hz, 2H), 2.33 (s, 3H), 2.30 (s, 3H), 1.04 (s, 6H).

$^{19}\text{F}$  NMR (377 MHz,  $\text{CDCl}_3$ )  $\delta$  -56.1 (t,  $J = 21.7$  Hz, 3F), -141.4 (m, 2F), -144.4 (m, 2F).

The carbon resonances corresponding to the perfluoroarene ( $\text{C}_7\text{F}_7$ ) in this compound appear as a complex series of multiplets between 105 ppm to 155 ppm as a result of  $^{13}\text{C}/^{19}\text{F}$  coupling. Due to the complexities of the system, the peaks are not listed.  $^{19}\text{F}$  NMR and HRMS were used to confirm the presence of this ring system.

$^{13}\text{C}$  NMR (176 MHz,  $\text{CDCl}_3$ )  $\delta$  174.9, 150.1, 144.0, 143.1, 137.2, 135.3, 134.6, 130.2, 129.3, 125.5, 121.0, 63.8, 51.1, 44.9, 42.5, 21.2, 20.0, 19.3.

HRMS (ESI $^+$ )  $[\text{M}+\text{H}]^+$  Calcd for  $\text{C}_{32}\text{H}_{28}\text{F}_7\text{N}_4\text{O}^+$ : 617.2151; Found: 617.2145.

$R_f = 0.70$  in 50% EtOAc in hexanes

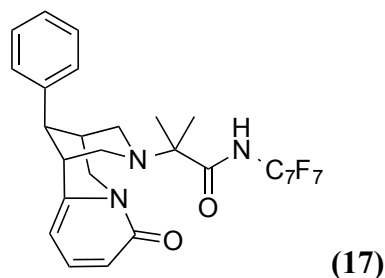

NOTE: The arylation reaction was conducted in *t*AmylOH (0.13 M in substrate).  $\text{NaBH}_4$  reduction was not required on this substrate.

Isolated yield using standard conditions: 25% yield (yellow oil).

Isolated yield when calculated based on recovered starting material: 32%

IR (thin film): 1717, 1653  $\text{cm}^{-1}$

$^1\text{H}$  NMR (700 MHz,  $\text{CDCl}_3$ )  $\delta$  7.68 (s, 1H), 7.44 (t,  $J = 14$  Hz, 2H), 7.38 (d,  $J = 14$  Hz, 2H), 7.31 (t,  $J = 14$  Hz, 1H), 7.09 (dd,  $J = 7, 0.7$  Hz, 1H), 6.38 (app d,  $J = 10.5$  Hz, 1H), 6.09 (app d,  $J = 7$  Hz, 1H), 4.45 (d,  $J = 15.4$  Hz, 1H), 4.15 (dd,  $J = 6.3, 15.4$  Hz, 1H), 3.65 (br s, 1H), 3.38 (br s, 1H), 3.18 (br s, 1H), 2.95 (m, 1H), 2.89 (m, 1H), 2.82 (d,  $J = 11.9$  Hz, 1H), 2.65 (app d,  $J = 11.9$  Hz, 1H), 1.24 (s, 3H), 1.08 (s, 3H).



$^{19}\text{F}$  NMR (377 MHz,  $\text{CDCl}_3$ )  $\delta$  -56.1 (t,  $J = 21.9$  Hz, 3F), -140.9 (m, 2F), -142.9 (m, 2F).

The carbon resonances corresponding to the perfluoroarene ( $\text{C}_7\text{F}_7$ ) in this compound appear as a complex series of multiplets between 105 ppm to 155 ppm as a result of  $^{13}\text{C}/^{19}\text{F}$  coupling. Due to the complexities of the system, the peaks are not listed.  $^{19}\text{F}$  NMR and HRMS were used to confirm the presence of this ring system.

$^{13}\text{C}$  NMR (176 MHz,  $\text{CDCl}_3$ )  $\delta$  174.8, 163.1, 150.9, 138.6, 137.7, 129.3, 127.3, 127.1, 117.5, 105.0, 64.6, 52.6, 50.0, 48.0, 39.7, 36.1, 31.1, 23.7, 17.8.

HRMS (ESI $^+$ )  $[\text{M}+\text{H}]^+$  Calcd for  $\text{C}_{28}\text{H}_{25}\text{F}_7\text{N}_3\text{O}_2$ : 568.1830; Found: 568.1829.

$R_f = 0.25$  in 60% EtOAc in hexanes

## VII. Other Experiments

Effect of amount of aryl iodide on yields:

**Table S5.** Evaluation of equivalents of iodobenzene for substrate **10** under neat conditions.

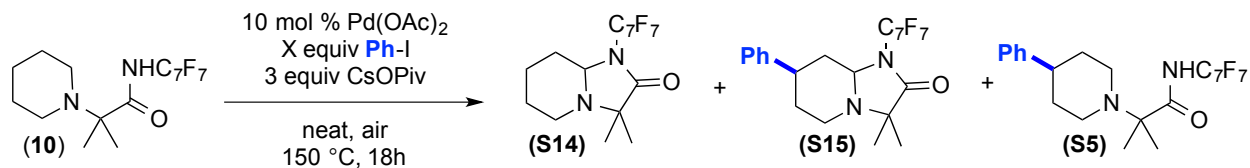

| Entry    | Equiv PhI | Conversion | Yield S14 <sup>a</sup> | Yield S15 <sup>a</sup> | Yield S5 <sup>a</sup> |
|----------|-----------|------------|------------------------|------------------------|-----------------------|
| 1        | 1         | 43%        | 18%                    | nd                     | nd                    |
| 2        | 5         | 82%        | 9%                     | nd                     | 5%                    |
| 3        | 10        | 91%        | 5%                     | 2%                     | 14%                   |
| 4        | 15        | 89%        | 7%                     | 2%                     | 25%                   |
| 5        | 20        | 86%        | 11%                    | 4%                     | 32%                   |
| <b>6</b> | <b>30</b> | <b>93%</b> | <b>28%</b>             | <b>11%</b>             | <b>44%</b>            |
| 7        | 70        | 84%        | 14%                    | 8%                     | 40%                   |

<sup>a</sup> All yields determined by gas chromatography (GC). nd, not detected.

**Table S6.** Evaluation of equivalents of iodobenzene for substrate **10** in *t*-AmylOH.

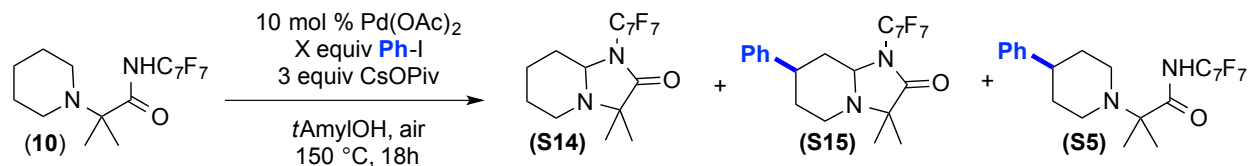

| Entry | Equiv PhI | Conversion | Yield S14 <sup>a</sup> | Yield S15 <sup>a</sup> | Yield S5 <sup>a</sup> |
|-------|-----------|------------|------------------------|------------------------|-----------------------|
| 1     | 1         | 59%        | 26%                    | nd                     | 5%                    |
| 2     | 5         | 68%        | 24%                    | 2%                     | 14%                   |
| 3     | 10        | 68%        | 19%                    | 2%                     | 19%                   |
| 4     | 15        | 71%        | 20%                    | 2%                     | 24%                   |
| 5     | 20        | 74%        | 18%                    | 3%                     | 26%                   |
| 6     | 30        | 78%        | 17%                    | 4%                     | 29%                   |
| 7     | 70        | 78%        | 14%                    | 4%                     | 39%                   |

<sup>a</sup> All yields determined by gas chromatography (GC). nd, not detected.

**Table S7.** Evaluation of equivalents of aryl iodide for C-H arylation of substrate **3**.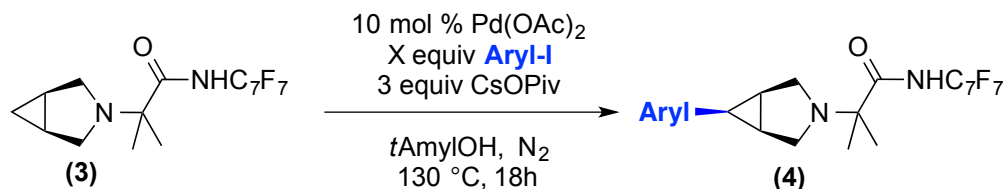

| Entry | Aryl Iodide                 | Yield <b>4</b><br>(20 equiv of<br>Aryl-I) <sup>a</sup> | Yield <b>4</b><br>(5 equiv of<br>Aryl-I) <sup>a</sup> | Yield <b>4</b><br>(2 equiv of<br>Aryl-I) <sup>a</sup> | Yield <b>4</b><br>(1 equiv of<br>Aryl-I) <sup>a</sup> |
|-------|-----------------------------|--------------------------------------------------------|-------------------------------------------------------|-------------------------------------------------------|-------------------------------------------------------|
| 1     | 4-iodoanisole               | 93%                                                    | 91%                                                   | 86%                                                   | 83%                                                   |
| 2     | iodobenzene                 | 89%                                                    | 86%                                                   | 90%                                                   | 87%                                                   |
| 3     | 1-iodo-3,5-                 |                                                        |                                                       |                                                       |                                                       |
|       | bis(trifluoromethyl)benzene | 88%                                                    | 89%                                                   | 88%                                                   | 85%                                                   |
| 4     | 2-fluoriodobenzene          | 77%                                                    | 80%                                                   | 75%                                                   | 65%                                                   |
| 5     | 1-bromo-4-iodobenzene       | 76%                                                    | 72%                                                   | 81%                                                   | 72%                                                   |
| 6     | 3-iodophenol                | 53%                                                    | 62%                                                   | 66%                                                   | 57%                                                   |
| 7     | 4-iodobenzaldehyde          | 61%                                                    | 63%                                                   | 67%                                                   | 61%                                                   |
| 8     | 2-fluoro-3-iodopyridine     | 42%                                                    | 70%                                                   | 69%                                                   | 53%                                                   |
| 9     | 1-BOC-5-iodoindole          | 55%                                                    | 55%                                                   | 51%                                                   | 39%                                                   |

<sup>a</sup>Uncalibrated yields determined by gas chromatography (GC) using trimethoxybenzene as internal standard.

Use of other aryl halides and triflates in the C-H arylation reaction of **3**:

**Table S8.** Evaluation of Ph-Cl, -OTf, -Br for C-H arylation of substrate **3**.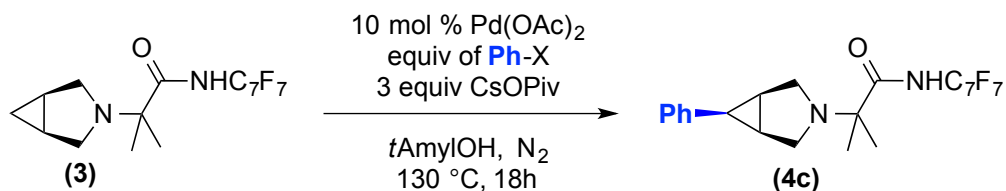

| Entry    | Ph-X (equiv)             | Conversion | Yield <b>5</b> <sup>a</sup> | Yield <b>4c</b> <sup>a</sup> |
|----------|--------------------------|------------|-----------------------------|------------------------------|
| 1        | Chlorobenzene (20)       | 26%        | 14%                         | nd                           |
| 2        | Phenyl triflate (20)     | 17%        | 8%                          | nd                           |
| <b>3</b> | <b>Bromobenzene (20)</b> | <b>43%</b> | <b>17%</b>                  | <b>14%</b>                   |
| 4        | Bromobenzene (2)         | 43%        | 13%                         | <2%                          |
| 5        | Bromobenzene (1)         | 47%        | 13%                         | <2%                          |

<sup>a</sup>All yields determined by gas chromatography (GC).

**Table S9.** Evaluation of equivalents of iodobenzene for C-H arylation of substrate **S12**.

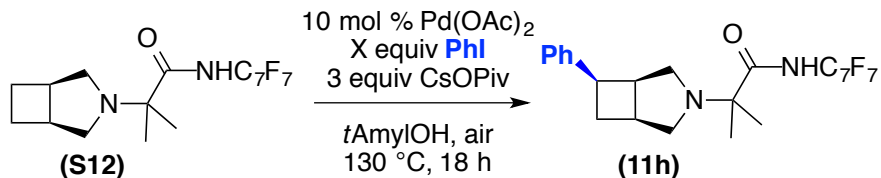

| Entry | Equiv PhI | Yield <b>11h</b> <sup>a</sup> |
|-------|-----------|-------------------------------|
| 1     | 30        | 59%                           |
| 2     | 10        | 53%                           |
| 3     | 2         | 35%                           |
| 4     | 1         | 24%                           |

<sup>a</sup>Uncalibrated yields determined by gas chromatography (GC) using trimethoxybenzene as internal standard.

### Gram scale C–H arylation reactions:

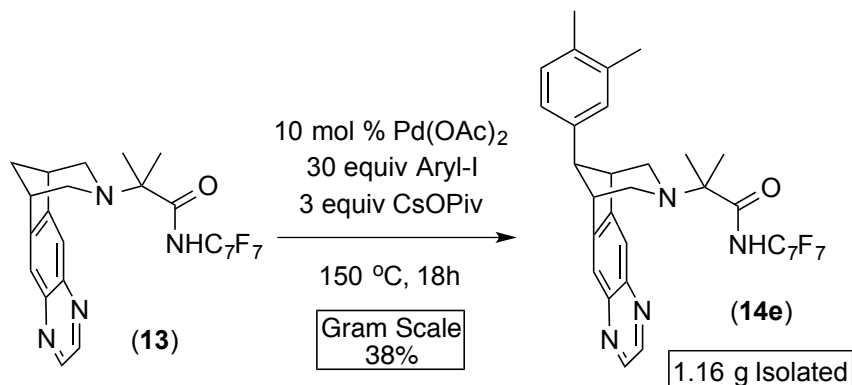

Under ambient conditions, a 50 mL round bottom flask was charge with substrate **13** (2.51 g, 4.0 mmol, 1 equiv), Pd(OAc)<sub>2</sub> (110 mg, 0.49 mmol, 10 mol%), cesium pivalate (3.45 g, 14.7 mmol, 3 equiv) and 4-iodo-*o*-xylene (20.9 mL, 147 mmol, 30 equiv). The flask was sealed with a glass stopper, and heated to an external temperature of 150 °C. After reaching the appropriate temperature, excess pressure was vented from the flask, and it was resealed. After 24 h, the reaction was removed from the heat source, hydrazine (3 mL, 65% in H<sub>2</sub>O, 40 mmol, 8 equiv) and hexanes (5 mL) were added to the warm solution. The mixture was then allowed to stir for 1 h at 60 °C to remove Pd from the product. This solution was loaded onto a large plug of silica gel over which hexanes (1.5 L) was passed to remove iodobenzene. The plug of silica was then rinsed with EtOAc (1 L) to elute the product, and this solution was concentrated under reduced pressure. Purification by column chromatography (100 g cartridge, gradient elution from 0% to 40% EtOAc in hexanes) afforded the desired product **14e** as a brown solid (1.16 g, 38% yield).

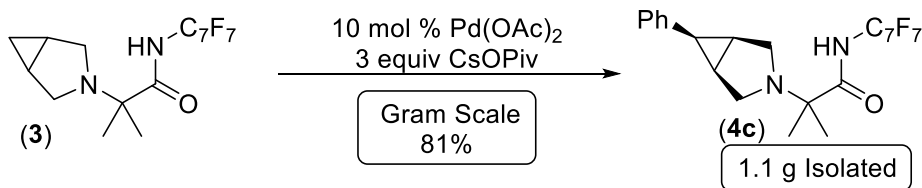

Under ambient conditions, a 50 mL round bottom flask was charged with substrate **3** (1.17 g, 3.04 mmol, 1 equiv), Pd(OAc)<sub>2</sub> (74 mg, 0.33 mmol, 10 mol %), cesium pivalate (2.38 g, 10 mmol, 3 equiv), iodobenzene (7 mL, 62 mmol, 20 equiv), and *t*-amyl alcohol (21 mL). The flask was sealed with a septum, and heated to an external temperature of 130 °C. After reaching the appropriate temperature, excess pressure was vented from the flask, and it was resealed. After 23 h, the reaction was removed from the heat source, and hydrazine (1 mL, 35% in H<sub>2</sub>O, 10 mmol, 3 equiv) was added to the warm solution. The mixture was then allowed to stir for 30 min at 60 °C to remove Pd from the product. The resulting solution was diluted with EtOAc and filtered through a layered plug of celite and basic alumina. The pad was rinsed with additional EtOAc, and the resulting solution was concentrated under reduced pressure. Purification by column chromatography (50 g cartridge, gradient elution from 0% to 20% EtOAc in hexanes) afforded the desired product as an oil. The oil was triturated with hexanes, and the volatiles were removed under reduced pressure to afford the desired product **4c** as a white solid (1.14 g, 81% yield).

### Optimization of C-N bond cleavage mediated by SmI<sub>2</sub>

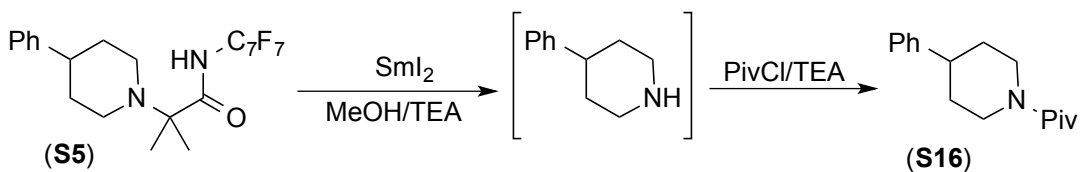

Inside of a glove box at room temperature, a stock solution of amine **S5** (121 mg, 0.26 mmol) was prepared in THF (3 mL). An aliquot of this solution was transferred to a vial (4 mL capacity, 200  $\mu$ L, 0.018 mmol amine **S5**, 1 equiv), and SmI<sub>2</sub> (2 mL, 0.1 M in THF, 0.2 mmol, 10 equiv), MeOH, (varied from 3.5  $\mu$ L to 28  $\mu$ L) and TEA (varied from 12  $\mu$ L to 100  $\mu$ L) were added. The vial was sealed with a Teflon-lined cap and removed from the glove box. The solutions maintained a deep blue color for varying amounts of time depending on the equiv of various reagents added. After 18 h, pivaloyl chloride (100  $\mu$ L, 0.8 mmol) and additional TEA (200  $\mu$ L,

1.4 mmol) were added, which immediately quenched the blue color (if any remained) and resulted in a clear solution with white precipitate. A solution of internal standard (1,3,5-trimethoxybenzene, 59 mg in 4 mL DCM) was prepared, and an aliquot (200  $\mu$ L) of the stock standard solution was added to the reaction vial. The reaction solution was then diluted with EtOAc and HCl (2M, aqueous), which produced a yellow solution free of precipitates. The phases were separated, and the organic layer was filtered through a pipette packed with Na<sub>2</sub>SO<sub>4</sub> and was analyzed by GC-FID. The average value of duplicate GC injections was used to determine the GC yield based on a linear 5-point calibration curve with 1,3,5-trimethoxybenzene.

Variations of this procedure were used in all optimization reactions (Table S10) where the yield was determined by GC-FID. For instance, the impact of equiv SmI<sub>2</sub> could be determined by following the same procedure outlined above except that different volumes of SmI<sub>2</sub> in THF solution were transferred to each vial.

**Table S10.** Optimization for the directing group removal.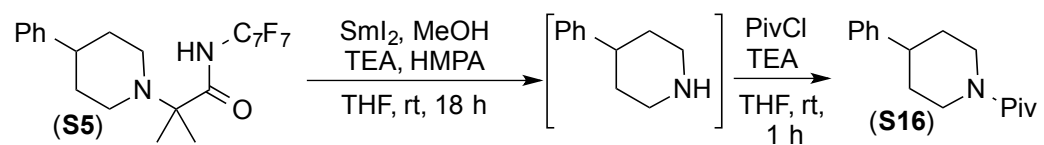

| entry                 | equiv SmI <sub>2</sub> | equiv MeOH | equiv TEA | conversion  | yield <b>S16</b> |
|-----------------------|------------------------|------------|-----------|-------------|------------------|
| 1                     | 3                      | 0          | 0         | <10%        | <10%             |
| 2                     | 5                      | 0          | 0         | <10%        | <10%             |
| 3                     | 10                     | 0          | 0         | <10%        | <10%             |
| 4                     | 5                      | 5          | 5         | <10%        | <10%             |
| 5                     | 10                     | 10         | 10        | 21%         | 13%              |
| 6                     | 10                     | 5          | 10        | 74%         | 42%              |
| 7                     | 10                     | 10         | 10        | 81%         | 56%              |
| 8                     | 10                     | 20         | 10        | 91%         | 52%              |
| 9                     | 10                     | 40         | 10        | 98%         | 57%              |
| 10                    | 10                     | 10         | 5         | 44%         | 22%              |
| 11                    | 10                     | 10         | 10        | 54%         | 23%              |
| 12                    | 10                     | 10         | 20        | 55%         | 25%              |
| 13                    | 10                     | 10         | 40        | 78%         | 35%              |
| 14                    | 10                     | 15         | 15        | 74%         | 39%              |
| 15                    | 10                     | 20         | 20        | 73%         | 47%              |
| 16                    | 10                     | 30         | 30        | 88%         | 53%              |
| 17                    | 10                     | 50         | 50        | 94%         | 62%              |
| <b>18<sup>a</sup></b> | <b>10</b>              | <b>50</b>  | <b>50</b> | <b>100%</b> | <b>95%</b>       |

<sup>a</sup> additional 8 equiv HMPA were added

### Isolation of C-N bond cleavage product

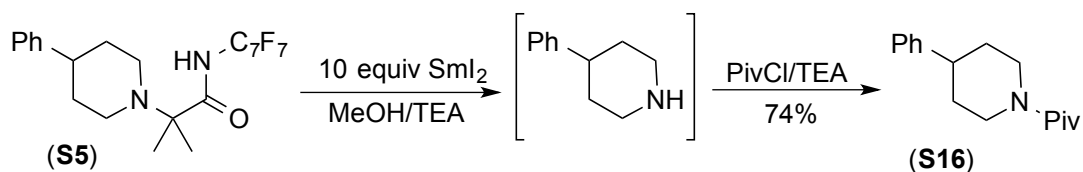

In a glove box, a vial was charged with solid amine **S5** (66 mg, 0.14 mmol) to which a solution of SmI<sub>2</sub> (15 mL, 0.1M in THF, 1.5 mmol) was added. To this solution, MeOH (0.3 mL, 7.5 mmol) and TEA (1.0 mL, 14 mmol) were added. The vial was then sealed with a Teflon-lined

cap and removed from the glove box. The solution was allowed to stand at room temperature for 18 h, after which the reaction was quenched by dropwise addition of pivaloyl chloride (1.0 mL, 8.1 mmol) followed by the addition of additional TEA (1.0 mL, 14 mmol). The resulting solution was allowed to remain at room temperature for 90 min, after which it was poured onto 2M HCl. The mixture was extracted with EtOAc. The combined organic phases were washed with brine, dried (Na<sub>2</sub>SO<sub>4</sub>), filtered, and concentrated under reduced pressure. Purification by column chromatography (25 g cartridge, gradient elution from 0% to 40% EtOAc in hexanes) afforded amide **S15** (29 mg, 78% yield). In a replicate experiment, amide **S16** was isolated in 70% yield for an average of 74% yield.

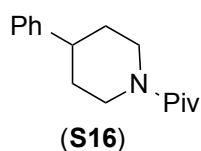

Isolated yield: 78%, 70%; 74% average yield

MP 87 °C (off white solid)

IR (thin film): 1617 cm<sup>-1</sup>

<sup>1</sup>H NMR (700 MHz, CDCl<sub>3</sub>) δ 7.31 (m, 2H), 7.23-7.19 (multiple peaks, 3H), 4.58 (d, *J* = 12.2 Hz, 2H), 2.87 (t, *J* = 12.9 Hz, 2H), 2.76 (tt, *J* = 12.2, 4.1 Hz, 1H), 1.90 (d, *J* = 13.1 Hz, 2H), 1.63 (qd, *J* = 12.6, 4.1 Hz, 2H), 1.31 (s, 9H).

<sup>13</sup>C NMR (176 MHz, CDCl<sub>3</sub>) δ 176.1, 145.3, 128.5, 126.7, 126.4, 45.8, 42.8, 38.7, 33.5, 28.4.

HRMS (ESI<sup>+</sup>) [M+H]<sup>+</sup> Calcd for C<sub>16</sub>H<sub>24</sub>NO<sup>+</sup>: 246.1858; Found: 246.1852.

*R<sub>f</sub>* = 0.40 in 20% EtOAc in hexanes

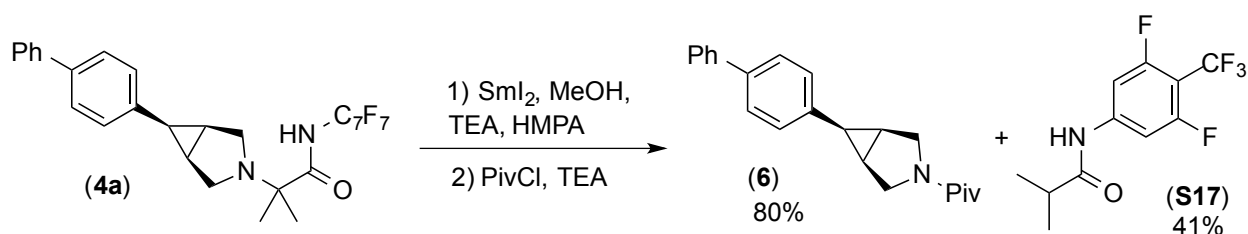

In a glove box, a vial was charged with solid amine **4a** (53 mg, 0.10 mmol) to which a solution of SmI<sub>2</sub> (12 mL, 0.1M in THF, 1.2 mmol) was added. To this solution, MeOH (160 μL, 4.0 mmol), TEA (550 μL, 8 mmol), and HMPA (100 μL, 0.55 mmol) were added. The vial was then sealed with a Teflon-lined cap and removed from the glove box. The solution was allowed to stand at room temperature for 18 h, after which the reaction was quenched by dropwise addition of pivaloyl chloride (1.0 mL, 8.1 mmol) followed by the addition of additional TEA (1.0 mL, 14 mmol). The resulting solution was allowed to remain at room temperature for 90 min, after which it was poured onto 2M HCl. The mixture was extracted with EtOAc. The combined



organic phases were washed with brine, dried (Na<sub>2</sub>SO<sub>4</sub>), filtered, and concentrated under reduced pressure. Purification by column chromatography (25 g cartridge, gradient elution from 0% to 40% EtOAc in hexanes) afforded amide **6** (26 mg, 82% yield) and the isopropyl amide **S17** (11 mg, 41% yield). In a replicate experiment, the amide product **6** was isolated in 78% yield for an average of 80%.

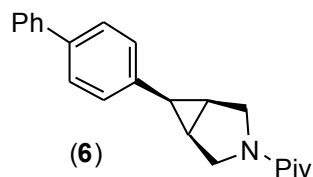

Isolated yield: 82%, 78%; 80% average yield

MP 162 °C (white solid)

IR (thin film): 1616 cm<sup>-1</sup>

<sup>1</sup>H NMR (700 MHz, CDCl<sub>3</sub>, at 52 °C) δ 7.52-7.48 (multiple peaks, 4H), 7.40 (t, *J* = 7.5 Hz, 2H), 7.32-7.29 (multiple peaks, 3H), 3.90 (br s, 2H), 3.62 (d, *J* = 11.6 Hz, 2H), 2.21 (t, *J* = 7.9 Hz, 1H), 1.98 (d, *J* = 7.2 Hz, 2H), 0.83 (s, 9H).

<sup>13</sup>C NMR (176 MHz, CDCl<sub>3</sub>, at 52 °C) δ 175.6, 141.1, 139.6, 133.7, 129.6, 128.6, 127.2, 127.0, 126.9, 47.0, 38.6, 26.9, 22.6, 20.6.

HRMS (ESI<sup>+</sup>) [M+H]<sup>+</sup> Calcd for C<sub>22</sub>H<sub>26</sub>NO<sup>+</sup>: 320.2014; Found: 320.2004.

*R<sub>f</sub>* = 0.11 in 20% EtOAc in hexanes

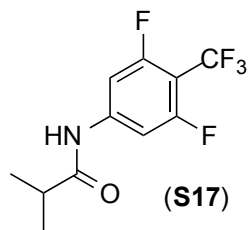

Isolated yield: 41%, 40%; 41% average yield

MP 140 °C (white solid)

IR (thin film): 1683 cm<sup>-1</sup>

<sup>1</sup>H NMR (700 MHz, CDCl<sub>3</sub>) δ 7.41 (br s, 1H), 7.29 (d, *J* = 11.5 Hz, 2H), 2.52 (septet, *J* = 7.0 Hz, 1H), 1.25 (d, *J* = 7.0 Hz, 6H).

<sup>19</sup>F NMR (377 MHz, CDCl<sub>3</sub>) δ -56.0 (t, *J* = 21.3 Hz, 3F), -108.8 (qd, *J* = 21.3, 11.2 Hz, 2F).

<sup>13</sup>C NMR (176 MHz, CDCl<sub>3</sub>) δ 175.7, 160 (m), 142.9 (t, *J*<sub>C-F</sub> = 13.4 Hz), 121.6 (q, *J*<sub>C-F</sub> = 272 Hz), 103.1 (dd, *J*<sub>C-F</sub> = 26.6, 3.7 Hz), 102.7 (m), 36.8, 19.3.

HRMS (ESI<sup>+</sup>) [M+H]<sup>+</sup> Calcd for C<sub>11</sub>H<sub>11</sub>F<sub>5</sub>NO<sup>+</sup>: 268.0761; Found: 268.0751.

*R<sub>f</sub>* = 0.38 in 20% EtOAc in hexanes

## Determination of the er for Phenylalanine derived product 4k

A racemic sample of **4k** was prepared as follows: Product **4k** (18 mg, 0.03 mmol) was dissolved in dioxane (0.5 mL) and solid NaOMe (7 mg, 0.13 mmol) was added at room temperature. After 15 min, the reaction was quenched by addition of AcOH (20  $\mu$ L, 0.3 mmol) and the solution was passed through a plug of layered Celite, basic alumina, and silica gel. The plug was rinsed with EtOAc and the eluent was concentrated under reduced pressure.

Analysis was conducted on a Waters SFC system with an analytical AD-H chiral column (4.6 mm x 250 mm). The run program was conducted with the following parameters: isocratic 10% IPA co-solvent, flow rate of 3.2 mL/min, temperature of column oven at 40  $^{\circ}$ C, 120 bar backpressure. Below is a representative chromatogram:

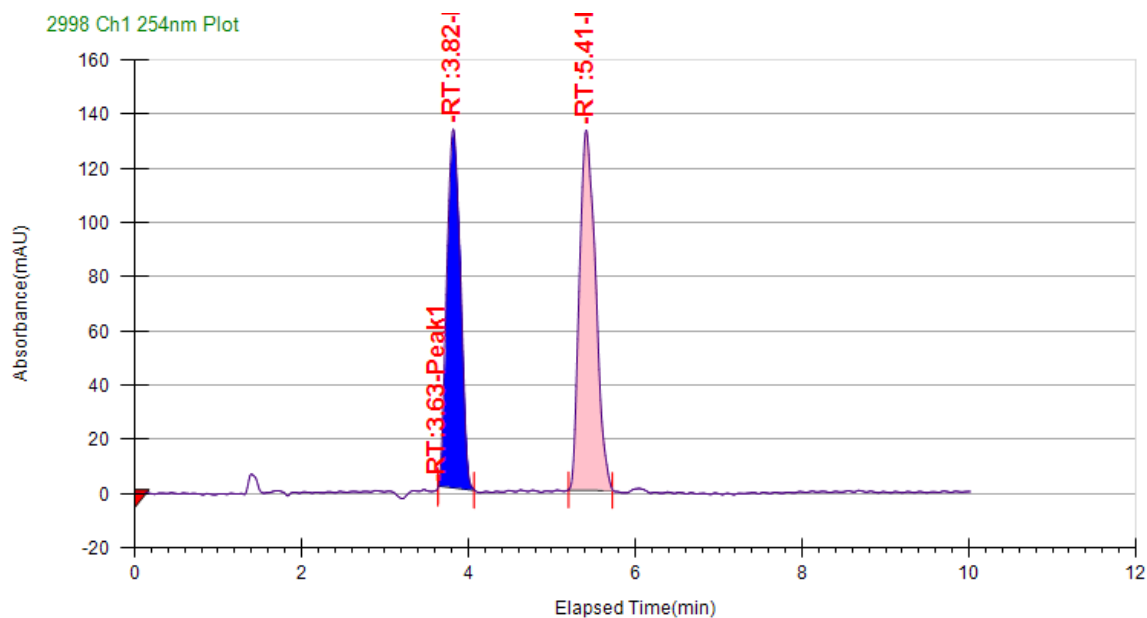

### Peak Information

| Peak No | % Area  | Area      | Ret. Time | Height   | Cap. Factor |
|---------|---------|-----------|-----------|----------|-------------|
| 1       | 0       | 0         | 3.63 min  | 0        | 3632.3333   |
| 2       | 45.4422 | 1465.6752 | 3.82 min  | 132.2653 | 3815.6667   |
| 3       | 54.5578 | 1759.6885 | 5.41 min  | 132.8034 | 5407.3333   |

### VIII. X-Ray Crystallographic analysis of 4a, 14a, analog of 11g, 11b, 11h.

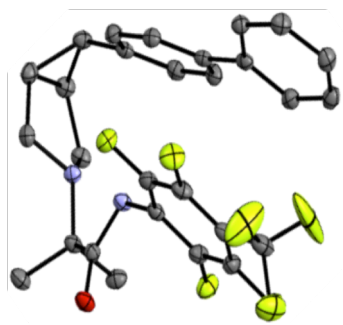

**Figure S3.** Structure determination of compound **4a**.

White block-like crystals of **4a** were grown from a dichloromethane/butyl ether solution of the compound at 22 deg. C. A crystal of dimensions 0.20 x 0.14 x 0.14 mm was mounted on a Rigaku AFC10K Saturn 944+ CCD-based X-ray diffractometer equipped with a low temperature device and Micromax-007HF Cu-target micro-focus rotating anode ( $\lambda = 1.54187$  Å) operated at 1.2 kW power (40 kV, 30 mA). The X-ray intensities were measured at 85(1) K with the detector placed at a distance 42.00 mm from the crystal. A total of 4151 images were collected with an oscillation width of  $1.0^\circ$  in  $\omega$ . The exposure time was 1 sec. for the low angle images, 6 sec. for high angle. The integration of the data yielded a total of 66373 reflections to a maximum  $2\theta$  value of  $136.48^\circ$  of which 4320 were independent and 3972 were greater than  $2\sigma(I)$ . The final cell constants (Table S11) were based on the xyz centroids 29330 reflections above  $10\sigma(I)$ . Analysis of the data showed negligible decay during data collection; the data were processed with CrystalClear 2.0 and corrected for absorption. The structure was solved and refined with the Bruker SHELXTL (version 2008/4) software package, using the space group  $P2(1)/n$  with  $Z = 4$  for the formula  $C_{28}H_{23}N_2O_7$ . All non-hydrogen atoms were refined anisotropically with the hydrogen atoms placed in idealized or refined positions. Full matrix least-squares refinement based on  $F^2$  converged at  $R1 = 0.0459$  and  $wR2 = 0.1150$  [based on  $I > 2\sigma(I)$ ],  $R1 = 0.0487$  and  $wR2 = 0.01170$  for all data. Additional details are presented below. Acknowledgement is made for funding from NSF grant CHE-0840456 for X-ray instrumentation.

Sheldrick, G.M. SHELXTL, v. 2008/4; Bruker Analytical X-ray, Madison, WI, 2008.

CrystalClear Expert 2.0 r12, Rigaku Americas and Rigaku Corporation (2011), Rigaku Americas, 9009, TX, USA 77381-5209, Rigaku Tokyo, 196-8666, Japan.

**Table S11.** Crystal data and structure refinement for **4a**.

|                                   |                                                                                                        |
|-----------------------------------|--------------------------------------------------------------------------------------------------------|
| Empirical formula                 | C <sub>28</sub> H <sub>23</sub> F <sub>7</sub> N <sub>2</sub> O                                        |
| Formula weight                    | 536.48                                                                                                 |
| Temperature                       | 85(2) K                                                                                                |
| Wavelength                        | 1.54178 Å                                                                                              |
| Crystal system, space group       | Monoclinic, P2(1)/n                                                                                    |
| Unit cell dimensions              | a = 6.421(2) Å    α = 90 °.<br>b = 18.0944(3) Å    β = 98.590(11) °.<br>c = 20.5377(14) Å    γ = 90 °. |
| Volume                            | 2359.2(8) Å <sup>3</sup>                                                                               |
| Z, Calculated density             | 4, 1.513 Mg/m <sup>3</sup>                                                                             |
| Absorption coefficient            | 1.131 mm <sup>-1</sup>                                                                                 |
| F(000)                            | 1104                                                                                                   |
| Crystal size                      | 0.20 x 0.14 x 0.14 mm                                                                                  |
| Theta range for data collection   | 3.27 to 68.24 deg.                                                                                     |
| Limiting indices                  | -7<=h<=7, -21<=k<=21, -24<=l<=24                                                                       |
| Reflections collected / unique    | 66373 / 4320 [R(int) = 0.0583]                                                                         |
| Completeness to theta             | = 68.24    100.0 %                                                                                     |
| Absorption correction             | Semi-empirical from equivalents                                                                        |
| Max. and min. transmission        | 0.8578 and 0.8055                                                                                      |
| Refinement method                 | Full-matrix least-squares on F <sup>2</sup>                                                            |
| Data / restraints / parameters    | 4320 / 0 / 349                                                                                         |
| Goodness-of-fit on F <sup>2</sup> | 1.044                                                                                                  |
| Final R indices [I>2σ(I)]         | R1 = 0.0459, wR2 = 0.1150                                                                              |
| R indices (all data)              | R1 = 0.0487, wR2 = 0.1170                                                                              |
| Largest diff. peak and hole       | 0.968 and -0.490 e.Å <sup>-3</sup>                                                                     |

**Atomic coordinates ( x 10<sup>4</sup>) and equivalent isotropic 4a**

displacement parameters (Å<sup>2</sup> x 10<sup>3</sup>)

U(eq) is defined as one third of the trace of the orthogonalized U<sub>ij</sub> tensor.

|      | x        | y       | z        | U(eq) |
|------|----------|---------|----------|-------|
| O(1) | 8292(2)  | 2225(1) | 12984(1) | 22(1) |
| N(1) | 8249(2)  | 1501(1) | 12082(1) | 18(1) |
| N(2) | 8365(2)  | 254(1)  | 12769(1) | 17(1) |
| F(1) | 7306(3)  | 4229(1) | 10067(1) | 78(1) |
| F(2) | 10265(4) | 3795(1) | 9929(1)  | 95(1) |
| F(3) | 10011(3) | 4528(1) | 10714(1) | 46(1) |
| F(4) | 12347(2) | 3429(1) | 11338(1) | 33(1) |

|       |          |          |          |       |
|-------|----------|----------|----------|-------|
| F(5)  | 11943(2) | 2295(1)  | 12131(1) | 29(1) |
| F(6)  | 4866(2)  | 2002(1)  | 11160(1) | 26(1) |
| F(7)  | 5251(2)  | 3106(1)  | 10344(1) | 32(1) |
| C(1)  | 9111(4)  | 3962(1)  | 10376(1) | 30(1) |
| C(2)  | 8808(3)  | 3316(1)  | 10814(1) | 23(1) |
| C(3)  | 10485(3) | 3080(1)  | 11281(1) | 24(1) |
| C(4)  | 10289(3) | 2491(1)  | 11690(1) | 21(1) |
| C(5)  | 8410(3)  | 2102(1)  | 11658(1) | 19(1) |
| C(6)  | 6736(3)  | 2341(1)  | 11201(1) | 20(1) |
| C(7)  | 6938(3)  | 2925(1)  | 10782(1) | 23(1) |
| C(8)  | 8426(3)  | 1612(1)  | 12748(1) | 17(1) |
| C(9)  | 8999(3)  | 917(1)   | 13167(1) | 18(1) |
| C(10) | 11419(3) | 956(1)   | 13322(1) | 23(1) |
| C(11) | 8063(3)  | 974(1)   | 13809(1) | 24(1) |
| C(12) | 6123(3)  | 44(1)    | 12690(1) | 20(1) |
| C(13) | 6067(3)  | -740(1)  | 12432(1) | 21(1) |
| C(14) | 8312(3)  | -1024(1) | 12575(1) | 21(1) |
| C(15) | 9606(3)  | -420(1)  | 12938(1) | 20(1) |
| C(16) | 7285(3)  | -902(1)  | 11874(1) | 20(1) |
| C(17) | 7778(3)  | -310(1)  | 11414(1) | 18(1) |
| C(18) | 9799(3)  | -152(1)  | 11287(1) | 20(1) |
| C(19) | 10132(3) | 375(1)   | 10822(1) | 20(1) |
| C(20) | 8454(3)  | 766(1)   | 10460(1) | 17(1) |
| C(21) | 6431(3)  | 600(1)   | 10588(1) | 18(1) |
| C(22) | 6107(3)  | 78(1)    | 11056(1) | 20(1) |
| C(23) | 8820(3)  | 1313(1)  | 9949(1)  | 17(1) |
| C(24) | 10797(3) | 1638(1)  | 9948(1)  | 21(1) |
| C(25) | 11182(3) | 2104(1)  | 9444(1)  | 24(1) |
| C(26) | 9584(3)  | 2270(1)  | 8930(1)  | 24(1) |
| C(27) | 7591(3)  | 1978(1)  | 8937(1)  | 23(1) |
| C(28) | 7209(3)  | 1506(1)  | 9438(1)  | 19(1) |

---

**Bond lengths [Å] and angles [°] for 4a.**

---

|            |          |
|------------|----------|
| O(1)-C(8)  | 1.218(2) |
| N(1)-C(8)  | 1.370(2) |
| N(1)-C(5)  | 1.406(2) |
| N(1)-H(1)  | 0.85(3)  |
| N(2)-C(15) | 1.470(2) |
| N(2)-C(9)  | 1.474(2) |
| N(2)-C(12) | 1.474(2) |
| F(1)-C(1)  | 1.326(3) |
| F(2)-C(1)  | 1.298(3) |
| F(3)-C(1)  | 1.321(2) |
| F(4)-C(3)  | 1.342(2) |

|              |          |
|--------------|----------|
| F(5)-C(4)    | 1.337(2) |
| F(6)-C(6)    | 1.340(2) |
| F(7)-C(7)    | 1.341(2) |
| C(1)-C(2)    | 1.506(3) |
| C(2)-C(7)    | 1.386(3) |
| C(2)-C(3)    | 1.397(3) |
| C(3)-C(4)    | 1.374(3) |
| C(4)-C(5)    | 1.390(3) |
| C(5)-C(6)    | 1.387(3) |
| C(6)-C(7)    | 1.381(3) |
| C(8)-C(9)    | 1.538(2) |
| C(9)-C(11)   | 1.532(2) |
| C(9)-C(10)   | 1.540(3) |
| C(10)-H(10A) | 0.9800   |
| C(10)-H(10B) | 0.9800   |
| C(10)-H(10C) | 0.9800   |
| C(11)-H(11A) | 0.9800   |
| C(11)-H(11B) | 0.9800   |
| C(11)-H(11C) | 0.9800   |
| C(12)-C(13)  | 1.512(3) |
| C(12)-H(12A) | 0.9900   |
| C(12)-H(12B) | 0.9900   |
| C(13)-C(16)  | 1.509(3) |
| C(13)-C(14)  | 1.517(3) |
| C(13)-H(13)  | 1.0000   |
| C(14)-C(15)  | 1.502(3) |
| C(14)-C(16)  | 1.507(2) |
| C(14)-H(14)  | 1.0000   |
| C(15)-H(15A) | 0.9900   |
| C(15)-H(15B) | 0.9900   |
| C(16)-C(17)  | 1.494(2) |
| C(16)-H(16)  | 1.0000   |
| C(17)-C(18)  | 1.391(3) |
| C(17)-C(22)  | 1.396(3) |
| C(18)-C(19)  | 1.387(3) |
| C(18)-H(18)  | 0.9500   |
| C(19)-C(20)  | 1.406(2) |
| C(19)-H(19)  | 0.9500   |
| C(20)-C(21)  | 1.395(3) |
| C(20)-C(23)  | 1.486(2) |
| C(21)-C(22)  | 1.385(3) |
| C(21)-H(21)  | 0.9500   |
| C(22)-H(22)  | 0.9500   |
| C(23)-C(24)  | 1.400(3) |
| C(23)-C(28)  | 1.403(2) |
| C(24)-C(25)  | 1.386(3) |

|                  |            |
|------------------|------------|
| C(24)-H(24)      | 0.9500     |
| C(25)-C(26)      | 1.390(3)   |
| C(25)-H(25)      | 0.9500     |
| C(26)-C(27)      | 1.386(3)   |
| C(26)-H(26)      | 0.9500     |
| C(27)-C(28)      | 1.388(3)   |
| C(27)-H(27)      | 0.9500     |
| C(28)-H(28)      | 0.9500     |
| C(8)-N(1)-C(5)   | 120.03(15) |
| C(8)-N(1)-H(1)   | 117.5(16)  |
| C(5)-N(1)-H(1)   | 120.1(16)  |
| C(15)-N(2)-C(9)  | 116.69(13) |
| C(15)-N(2)-C(12) | 107.33(14) |
| C(9)-N(2)-C(12)  | 117.04(14) |
| F(2)-C(1)-F(3)   | 107.5(2)   |
| F(2)-C(1)-F(1)   | 107.3(2)   |
| F(3)-C(1)-F(1)   | 104.55(18) |
| F(2)-C(1)-C(2)   | 112.34(17) |
| F(3)-C(1)-C(2)   | 111.92(16) |
| F(1)-C(1)-C(2)   | 112.75(19) |
| C(7)-C(2)-C(3)   | 116.76(17) |
| C(7)-C(2)-C(1)   | 123.78(18) |
| C(3)-C(2)-C(1)   | 119.46(18) |
| F(4)-C(3)-C(4)   | 118.29(17) |
| F(4)-C(3)-C(2)   | 120.07(17) |
| C(4)-C(3)-C(2)   | 121.63(18) |
| F(5)-C(4)-C(3)   | 118.97(17) |
| F(5)-C(4)-C(5)   | 119.53(16) |
| C(3)-C(4)-C(5)   | 121.50(17) |
| C(6)-C(5)-C(4)   | 116.94(17) |
| C(6)-C(5)-N(1)   | 122.64(17) |
| C(4)-C(5)-N(1)   | 120.42(16) |
| F(6)-C(6)-C(7)   | 118.57(16) |
| F(6)-C(6)-C(5)   | 119.74(16) |
| C(7)-C(6)-C(5)   | 121.69(17) |
| F(7)-C(7)-C(6)   | 117.61(17) |
| F(7)-C(7)-C(2)   | 120.93(17) |
| C(6)-C(7)-C(2)   | 121.46(17) |
| O(1)-C(8)-N(1)   | 122.17(16) |
| O(1)-C(8)-C(9)   | 123.05(16) |
| N(1)-C(8)-C(9)   | 114.56(15) |
| N(2)-C(9)-C(11)  | 114.85(15) |
| N(2)-C(9)-C(8)   | 109.38(14) |
| C(11)-C(9)-C(8)  | 109.64(14) |
| N(2)-C(9)-C(10)  | 109.75(14) |
| C(11)-C(9)-C(10) | 109.40(15) |

|                     |            |
|---------------------|------------|
| C(8)-C(9)-C(10)     | 103.18(14) |
| C(9)-C(10)-H(10A)   | 109.5      |
| C(9)-C(10)-H(10B)   | 109.5      |
| H(10A)-C(10)-H(10B) | 109.5      |
| C(9)-C(10)-H(10C)   | 109.5      |
| H(10A)-C(10)-H(10C) | 109.5      |
| H(10B)-C(10)-H(10C) | 109.5      |
| C(9)-C(11)-H(11A)   | 109.5      |
| C(9)-C(11)-H(11B)   | 109.5      |
| H(11A)-C(11)-H(11B) | 109.5      |
| C(9)-C(11)-H(11C)   | 109.5      |
| H(11A)-C(11)-H(11C) | 109.5      |
| H(11B)-C(11)-H(11C) | 109.5      |
| N(2)-C(12)-C(13)    | 104.57(14) |
| N(2)-C(12)-H(12A)   | 110.8      |
| C(13)-C(12)-H(12A)  | 110.8      |
| N(2)-C(12)-H(12B)   | 110.8      |
| C(13)-C(12)-H(12B)  | 110.8      |
| H(12A)-C(12)-H(12B) | 108.9      |
| C(16)-C(13)-C(12)   | 117.47(15) |
| C(16)-C(13)-C(14)   | 59.74(12)  |
| C(12)-C(13)-C(14)   | 106.13(15) |
| C(16)-C(13)-H(13)   | 119.3      |
| C(12)-C(13)-H(13)   | 119.3      |
| C(14)-C(13)-H(13)   | 119.3      |
| C(15)-C(14)-C(16)   | 119.93(15) |
| C(15)-C(14)-C(13)   | 106.78(15) |
| C(16)-C(14)-C(13)   | 59.87(12)  |
| C(15)-C(14)-H(14)   | 118.4      |
| C(16)-C(14)-H(14)   | 118.4      |
| C(13)-C(14)-H(14)   | 118.4      |
| N(2)-C(15)-C(14)    | 104.24(14) |
| N(2)-C(15)-H(15A)   | 110.9      |
| C(14)-C(15)-H(15A)  | 110.9      |
| N(2)-C(15)-H(15B)   | 110.9      |
| C(14)-C(15)-H(15B)  | 110.9      |
| H(15A)-C(15)-H(15B) | 108.9      |
| C(17)-C(16)-C(14)   | 127.25(16) |
| C(17)-C(16)-C(13)   | 121.58(15) |
| C(14)-C(16)-C(13)   | 60.39(12)  |
| C(17)-C(16)-H(16)   | 112.6      |
| C(14)-C(16)-H(16)   | 112.6      |
| C(13)-C(16)-H(16)   | 112.6      |
| C(18)-C(17)-C(22)   | 117.58(17) |
| C(18)-C(17)-C(16)   | 123.93(16) |
| C(22)-C(17)-C(16)   | 118.35(16) |



|                   |            |
|-------------------|------------|
| C(19)-C(18)-C(17) | 120.93(16) |
| C(19)-C(18)-H(18) | 119.5      |
| C(17)-C(18)-H(18) | 119.5      |
| C(18)-C(19)-C(20) | 121.69(17) |
| C(18)-C(19)-H(19) | 119.2      |
| C(20)-C(19)-H(19) | 119.2      |
| C(21)-C(20)-C(19) | 116.94(16) |
| C(21)-C(20)-C(23) | 121.74(16) |
| C(19)-C(20)-C(23) | 121.29(16) |
| C(22)-C(21)-C(20) | 121.20(16) |
| C(22)-C(21)-H(21) | 119.4      |
| C(20)-C(21)-H(21) | 119.4      |
| C(21)-C(22)-C(17) | 121.65(17) |
| C(21)-C(22)-H(22) | 119.2      |
| C(17)-C(22)-H(22) | 119.2      |
| C(24)-C(23)-C(28) | 117.49(17) |
| C(24)-C(23)-C(20) | 121.36(16) |
| C(28)-C(23)-C(20) | 121.12(16) |
| C(25)-C(24)-C(23) | 121.34(17) |
| C(25)-C(24)-H(24) | 119.3      |
| C(23)-C(24)-H(24) | 119.3      |
| C(24)-C(25)-C(26) | 120.34(17) |
| C(24)-C(25)-H(25) | 119.8      |
| C(26)-C(25)-H(25) | 119.8      |
| C(27)-C(26)-C(25) | 119.12(17) |
| C(27)-C(26)-H(26) | 120.4      |
| C(25)-C(26)-H(26) | 120.4      |
| C(26)-C(27)-C(28) | 120.56(18) |
| C(26)-C(27)-H(27) | 119.7      |
| C(28)-C(27)-H(27) | 119.7      |
| C(27)-C(28)-C(23) | 121.05(17) |
| C(27)-C(28)-H(28) | 119.5      |
| C(23)-C(28)-H(28) | 119.5      |

---

Symmetry transformations used to generate equivalent atoms:

**Anisotropic displacement parameters ( $\text{\AA}^2 \times 10^3$ ) for 4a.**

The anisotropic displacement factor exponent takes the form:  
 $-2 \pi^2 [ h^2 a^{*2} U_{11} + \dots + 2 h k a^* b^* U_{12} ]$

---

|      | U11   | U22   | U33   | U23   | U13  | U12  |
|------|-------|-------|-------|-------|------|------|
| O(1) | 30(1) | 16(1) | 21(1) | -2(1) | 5(1) | 3(1) |
| N(1) | 26(1) | 12(1) | 17(1) | 0(1)  | 4(1) | 0(1) |
| N(2) | 18(1) | 12(1) | 19(1) | -1(1) | 2(1) | 2(1) |

---

|       |        |       |       |       |        |        |
|-------|--------|-------|-------|-------|--------|--------|
| F(1)  | 76(1)  | 56(1) | 88(1) | 51(1) | -30(1) | -21(1) |
| F(2)  | 213(3) | 26(1) | 72(1) | 9(1)  | 107(2) | 13(1)  |
| F(3)  | 78(1)  | 22(1) | 37(1) | 4(1)  | 3(1)   | -14(1) |
| F(4)  | 34(1)  | 29(1) | 35(1) | 2(1)  | 6(1)   | -13(1) |
| F(5)  | 25(1)  | 32(1) | 27(1) | 6(1)  | -3(1)  | -4(1)  |
| F(6)  | 24(1)  | 24(1) | 29(1) | 1(1)  | 0(1)   | -3(1)  |
| F(7)  | 37(1)  | 30(1) | 26(1) | 7(1)  | -6(1)  | 4(1)   |
| C(1)  | 53(1)  | 19(1) | 19(1) | -2(1) | 8(1)   | -3(1)  |
| C(2)  | 39(1)  | 16(1) | 16(1) | -2(1) | 5(1)   | -1(1)  |
| C(3)  | 30(1)  | 20(1) | 22(1) | -3(1) | 5(1)   | -8(1)  |
| C(4)  | 26(1)  | 20(1) | 17(1) | -1(1) | 0(1)   | 0(1)   |
| C(5)  | 27(1)  | 13(1) | 16(1) | -2(1) | 5(1)   | 0(1)   |
| C(6)  | 23(1)  | 17(1) | 20(1) | -3(1) | 2(1)   | -1(1)  |
| C(7)  | 31(1)  | 19(1) | 16(1) | 0(1)  | -1(1)  | 2(1)   |
| C(8)  | 18(1)  | 16(1) | 18(1) | 0(1)  | 4(1)   | 0(1)   |
| C(9)  | 23(1)  | 15(1) | 16(1) | -1(1) | 2(1)   | 1(1)   |
| C(10) | 22(1)  | 19(1) | 26(1) | -2(1) | -2(1)  | 1(1)   |
| C(11) | 36(1)  | 21(1) | 18(1) | -1(1) | 6(1)   | 2(1)   |
| C(12) | 19(1)  | 20(1) | 20(1) | 2(1)  | 5(1)   | 1(1)   |
| C(13) | 24(1)  | 19(1) | 21(1) | 3(1)  | 4(1)   | -3(1)  |
| C(14) | 28(1)  | 15(1) | 21(1) | 2(1)  | 2(1)   | 1(1)   |
| C(15) | 24(1)  | 16(1) | 19(1) | 1(1)  | 1(1)   | 4(1)   |
| C(16) | 25(1)  | 15(1) | 20(1) | -1(1) | 1(1)   | -1(1)  |
| C(17) | 24(1)  | 14(1) | 16(1) | -3(1) | 1(1)   | 1(1)   |
| C(18) | 21(1)  | 19(1) | 19(1) | -1(1) | 2(1)   | 4(1)   |
| C(19) | 18(1)  | 21(1) | 21(1) | -1(1) | 3(1)   | 2(1)   |
| C(20) | 20(1)  | 15(1) | 16(1) | -4(1) | 1(1)   | 1(1)   |
| C(21) | 18(1)  | 18(1) | 19(1) | -1(1) | 0(1)   | 2(1)   |
| C(22) | 19(1)  | 20(1) | 21(1) | -1(1) | 2(1)   | -1(1)  |
| C(23) | 19(1)  | 14(1) | 19(1) | -4(1) | 3(1)   | 2(1)   |
| C(24) | 19(1)  | 19(1) | 24(1) | -2(1) | 2(1)   | 2(1)   |
| C(25) | 22(1)  | 19(1) | 33(1) | -1(1) | 8(1)   | -2(1)  |
| C(26) | 30(1)  | 16(1) | 27(1) | 3(1)  | 9(1)   | 1(1)   |
| C(27) | 28(1)  | 18(1) | 22(1) | 1(1)  | 1(1)   | 2(1)   |
| C(28) | 21(1)  | 17(1) | 20(1) | -1(1) | 2(1)   | -1(1)  |

---

**Hydrogen coordinates (  $\times 10^4$  ) and isotropic for 4a**  
displacement parameters ( $\text{Å}^2 \times 10^3$ )

---

|        | x        | y        | z         | U(eq) |
|--------|----------|----------|-----------|-------|
| H(1)   | 8400(40) | 1063(14) | 11950(11) | 25(6) |
| H(10A) | 12021    | 903      | 12913     | 34    |
| H(10B) | 11936    | 556      | 13625     | 34    |
| H(10C) | 11839    | 1433     | 13526     | 34    |

|        |       |       |       |    |
|--------|-------|-------|-------|----|
| H(11A) | 8406  | 525   | 14072 | 36 |
| H(11B) | 6530  | 1026  | 13708 | 36 |
| H(11C) | 8655  | 1405  | 14060 | 36 |
| H(12A) | 5262  | 375   | 12374 | 23 |
| H(12B) | 5587  | 66    | 13118 | 23 |
| H(13)  | 4880  | -1072 | 12505 | 25 |
| H(14)  | 8548  | -1543 | 12735 | 26 |
| H(15A) | 9807  | -509  | 13419 | 24 |
| H(15B) | 11004 | -384  | 12792 | 24 |
| H(16)  | 6837  | -1374 | 11642 | 24 |
| H(18)  | 10968 | -408  | 11521 | 24 |
| H(19)  | 11529 | 474   | 10747 | 24 |
| H(21)  | 5256  | 850   | 10350 | 22 |
| H(22)  | 4712  | -18   | 11135 | 24 |
| H(24)  | 11897 | 1538  | 10300 | 25 |
| H(25)  | 12544 | 2311  | 9450  | 29 |
| H(26)  | 9855  | 2579  | 8578  | 29 |
| H(27)  | 6478  | 2103  | 8597  | 28 |
| H(28)  | 5835  | 1310  | 9435  | 23 |

---

**Torsion angles [°] for 4a.**

---

|                     |             |
|---------------------|-------------|
| F(2)-C(1)-C(2)-C(7) | -106.5(3)   |
| F(3)-C(1)-C(2)-C(7) | 132.4(2)    |
| F(1)-C(1)-C(2)-C(7) | 14.9(3)     |
| F(2)-C(1)-C(2)-C(3) | 73.1(3)     |
| F(3)-C(1)-C(2)-C(3) | -48.0(3)    |
| F(1)-C(1)-C(2)-C(3) | -165.56(19) |
| C(7)-C(2)-C(3)-F(4) | 179.64(16)  |
| C(1)-C(2)-C(3)-F(4) | 0.0(3)      |
| C(7)-C(2)-C(3)-C(4) | -0.1(3)     |
| C(1)-C(2)-C(3)-C(4) | -179.69(17) |
| F(4)-C(3)-C(4)-F(5) | 0.7(3)      |
| C(2)-C(3)-C(4)-F(5) | -179.54(17) |
| F(4)-C(3)-C(4)-C(5) | -179.80(16) |
| C(2)-C(3)-C(4)-C(5) | -0.1(3)     |
| F(5)-C(4)-C(5)-C(6) | 178.71(16)  |
| C(3)-C(4)-C(5)-C(6) | -0.7(3)     |
| F(5)-C(4)-C(5)-N(1) | -0.6(3)     |
| C(3)-C(4)-C(5)-N(1) | 179.95(17)  |
| C(8)-N(1)-C(5)-C(6) | -114.4(2)   |
| C(8)-N(1)-C(5)-C(4) | 64.9(2)     |
| C(4)-C(5)-C(6)-F(6) | -177.97(15) |
| N(1)-C(5)-C(6)-F(6) | 1.3(3)      |
| C(4)-C(5)-C(6)-C(7) | 1.8(3)      |
| N(1)-C(5)-C(6)-C(7) | -178.94(17) |

|                         |             |
|-------------------------|-------------|
| F(6)-C(6)-C(7)-F(7)     | -1.9(3)     |
| C(5)-C(6)-C(7)-F(7)     | 178.32(16)  |
| F(6)-C(6)-C(7)-C(2)     | 177.73(16)  |
| C(5)-C(6)-C(7)-C(2)     | -2.0(3)     |
| C(3)-C(2)-C(7)-F(7)     | -179.25(16) |
| C(1)-C(2)-C(7)-F(7)     | 0.3(3)      |
| C(3)-C(2)-C(7)-C(6)     | 1.1(3)      |
| C(1)-C(2)-C(7)-C(6)     | -179.31(18) |
| C(5)-N(1)-C(8)-O(1)     | 15.3(3)     |
| C(5)-N(1)-C(8)-C(9)     | -159.54(16) |
| C(15)-N(2)-C(9)-C(11)   | -85.14(19)  |
| C(12)-N(2)-C(9)-C(11)   | 44.0(2)     |
| C(15)-N(2)-C(9)-C(8)    | 151.12(15)  |
| C(12)-N(2)-C(9)-C(8)    | -79.77(18)  |
| C(15)-N(2)-C(9)-C(10)   | 38.6(2)     |
| C(12)-N(2)-C(9)-C(10)   | 167.71(14)  |
| O(1)-C(8)-C(9)-N(2)     | 161.64(16)  |
| N(1)-C(8)-C(9)-N(2)     | -23.6(2)    |
| O(1)-C(8)-C(9)-C(11)    | 34.9(2)     |
| N(1)-C(8)-C(9)-C(11)    | -150.38(16) |
| O(1)-C(8)-C(9)-C(10)    | -81.6(2)    |
| N(1)-C(8)-C(9)-C(10)    | 93.15(17)   |
| C(15)-N(2)-C(12)-C(13)  | -31.68(17)  |
| C(9)-N(2)-C(12)-C(13)   | -165.11(14) |
| N(2)-C(12)-C(13)-C(16)  | -46.5(2)    |
| N(2)-C(12)-C(13)-C(14)  | 17.31(18)   |
| C(16)-C(13)-C(14)-C(15) | 115.31(16)  |
| C(12)-C(13)-C(14)-C(15) | 2.53(19)    |
| C(12)-C(13)-C(14)-C(16) | -112.78(16) |
| C(9)-N(2)-C(15)-C(14)   | 166.86(15)  |
| C(12)-N(2)-C(15)-C(14)  | 33.24(18)   |
| C(16)-C(14)-C(15)-N(2)  | 43.0(2)     |
| C(13)-C(14)-C(15)-N(2)  | -21.44(18)  |
| C(15)-C(14)-C(16)-C(17) | 16.0(3)     |
| C(13)-C(14)-C(16)-C(17) | 108.9(2)    |
| C(15)-C(14)-C(16)-C(13) | -92.93(18)  |
| C(12)-C(13)-C(16)-C(17) | -24.5(2)    |
| C(14)-C(13)-C(16)-C(17) | -117.89(19) |
| C(12)-C(13)-C(16)-C(14) | 93.40(17)   |
| C(14)-C(16)-C(17)-C(18) | 50.9(3)     |
| C(13)-C(16)-C(17)-C(18) | 125.79(19)  |
| C(14)-C(16)-C(17)-C(22) | -133.38(19) |
| C(13)-C(16)-C(17)-C(22) | -58.5(2)    |
| C(22)-C(17)-C(18)-C(19) | 0.2(3)      |
| C(16)-C(17)-C(18)-C(19) | 175.92(16)  |
| C(17)-C(18)-C(19)-C(20) | -0.4(3)     |

|                         |             |
|-------------------------|-------------|
| C(18)-C(19)-C(20)-C(21) | 0.0(3)      |
| C(18)-C(19)-C(20)-C(23) | -178.14(16) |
| C(19)-C(20)-C(21)-C(22) | 0.6(3)      |
| C(23)-C(20)-C(21)-C(22) | 178.68(16)  |
| C(20)-C(21)-C(22)-C(17) | -0.7(3)     |
| C(18)-C(17)-C(22)-C(21) | 0.3(3)      |
| C(16)-C(17)-C(22)-C(21) | -175.62(16) |
| C(21)-C(20)-C(23)-C(24) | 160.98(17)  |
| C(19)-C(20)-C(23)-C(24) | -21.0(3)    |
| C(21)-C(20)-C(23)-C(28) | -20.9(3)    |
| C(19)-C(20)-C(23)-C(28) | 157.15(17)  |
| C(28)-C(23)-C(24)-C(25) | -3.2(3)     |
| C(20)-C(23)-C(24)-C(25) | 174.95(17)  |
| C(23)-C(24)-C(25)-C(26) | 1.2(3)      |
| C(24)-C(25)-C(26)-C(27) | 1.6(3)      |
| C(25)-C(26)-C(27)-C(28) | -2.3(3)     |
| C(26)-C(27)-C(28)-C(23) | 0.2(3)      |
| C(24)-C(23)-C(28)-C(27) | 2.6(3)      |
| C(20)-C(23)-C(28)-C(27) | -175.63(16) |

---

Symmetry transformations used to generate equivalent atoms:

**Hydrogen bonds for 4a [A and °].**

---

| D-H...A          | d(D-H)  | d(H...A) | d(D...A) | <(DHA)    |
|------------------|---------|----------|----------|-----------|
| N(1)-H(1)...N(2) | 0.85(3) | 2.23(2)  | 2.656(2) | 110.8(19) |

---

Symmetry transformations used to generate equivalent atoms:

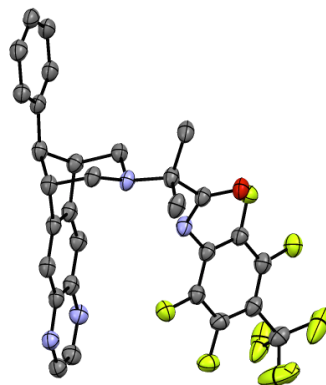

**Figure S4.** Structure determination of compound **14a**.

White plates of **14a** were grown by vapor diffusion of pentane to a solution of the compound in dichloromethane at 25 °C. A crystal of dimensions 0.24 x 0.19 x 0.10 mm was mounted on a

Rigaku AFC10K Saturn 944+ CCD-based X-ray diffractometer equipped with a low temperature device and Micromax-007HF Cu-target micro-focus rotating anode ( $\lambda = 1.54187$  Å) operated at 1.2 kW power (40 kV, 30 mA). The X-ray intensities were measured at 85(1) K with the detector placed at a distance 42.00 mm from the crystal. A total of 2028 images were collected with an oscillation width of  $1.0^\circ$  in  $\omega$ . The exposure times were 4 sec. for the low angle images, 20 sec. for high angle. The integration of the data yielded a total of 39629 reflections to a maximum  $2\theta$  value of  $136.44^\circ$  of which 4617 were independent and 3752 were greater than  $2\sigma(I)$ . The final cell constants (Table S12) were based on the xyz centroids 14067 reflections above  $10\sigma(I)$ . Analysis of the data showed negligible decay during data collection; the data were processed with CrystalClear 2.0 and corrected for absorption. The structure was solved and refined with the Bruker SHELXTL (version 2008/4) software package, using the space group P2(1)/c with  $Z = 4$  for the formula  $C_{30}H_{23}N_4OF_7$ . All non-hydrogen atoms were refined anisotropically with the hydrogen atoms placed in a mixture of idealized and refined positions. Full matrix least-squares refinement based on  $F^2$  converged at  $R1 = 0.0746$  and  $wR2 = 0.2080$  [based on  $I > 2\sigma(I)$ ],  $R1 = 0.0824$  and  $wR2 = 0.2228$  for all data. Additional details are presented below. Acknowledgement is made for funding from NSF grant CHE-0840456 for X-ray instrumentation.

**Table S12.** Crystal data and structure refinement for **14a**.

|                                 |                                                                                                                                        |
|---------------------------------|----------------------------------------------------------------------------------------------------------------------------------------|
| Empirical formula               | $C_{30}H_{23}F_7N_4O$                                                                                                                  |
| Formula weight                  | 588.52                                                                                                                                 |
| Temperature                     | 85(2) K                                                                                                                                |
| Wavelength                      | 1.54178 Å                                                                                                                              |
| Crystal system, space group     | Monoclinic, P2(1)/c                                                                                                                    |
| Unit cell dimensions            | $a = 12.9681(9)$ Å $\alpha = 90^\circ$ .<br>$b = 16.7751(3)$ Å $\beta = 91.492(6)^\circ$ .<br>$c = 11.7778(2)$ Å $\gamma = 90^\circ$ . |
| Volume                          | $2561.29(19)$ Å <sup>3</sup>                                                                                                           |
| Z, Calculated density           | 4, 1.526 Mg/m <sup>3</sup>                                                                                                             |
| Absorption coefficient          | $1.124$ mm <sup>-1</sup>                                                                                                               |
| F(000)                          | 1208                                                                                                                                   |
| Crystal size                    | 0.24 x 0.19 x 0.10 mm                                                                                                                  |
| Theta range for data collection | $3.41$ to $68.22^\circ$ .                                                                                                              |
| Limiting indices                | $-15 \leq h \leq 15$ , $-20 \leq k \leq 20$ , $-13 \leq l \leq 11$                                                                     |
| Reflections collected / unique  | 39629 / 4617 [R(int) = 0.1037]                                                                                                         |

|                                   |                                             |
|-----------------------------------|---------------------------------------------|
| Completeness to theta = 68.22     | 98.4 %                                      |
| Absorption correction             | Semi-empirical from equivalents             |
| Max. and min. transmission        | 0.8959 and 0.7743                           |
| Refinement method                 | Full-matrix least-squares on F <sup>2</sup> |
| Data / restraints / parameters    | 4617 / 33 / 413                             |
| Goodness-of-fit on F <sup>2</sup> | 1.117                                       |
| Final R indices [I>2sigma(I)]     | R1 = 0.0746, wR2 = 0.2080                   |
| R indices (all data)              | R1 = 0.0824, wR2 = 0.2228                   |
| Extinction coefficient            | 0.0053(6)                                   |
| Largest diff. peak and hole       | 0.643 and -0.359 e.A <sup>-3</sup>          |

### Atomic coordinates ( x 10<sup>4</sup>) and equivalent isotropic for 14a

displacement parameters (A<sup>2</sup> x 10<sup>3</sup>) for 14a.

U(eq) is defined as one third of the trace of the orthogonalized Uij tensor.

|       | x       | y       | z       | U(eq)  |
|-------|---------|---------|---------|--------|
| O(1)  | 2829(1) | 6427(1) | 816(2)  | 40(1)  |
| F(1)  | 7847(2) | 6340(2) | 638(2)  | 37(1)  |
| F(2)  | 8262(3) | 5163(2) | 1185(5) | 69(2)  |
| F(3)  | 8247(3) | 5904(4) | 2409(4) | 112(2) |
| F(1A) | 7874(4) | 6397(3) | 837(6)  | 103(2) |
| F(2A) | 8127(3) | 5168(2) | 971(5)  | 63(1)  |
| F(3A) | 8202(3) | 6133(2) | 2371(3) | 39(1)  |
| F(4)  | 6033(1) | 6112(1) | -108(1) | 46(1)  |
| F(5)  | 4096(1) | 5812(1) | 305(1)  | 41(1)  |
| F(6)  | 5048(1) | 4825(1) | 3928(1) | 42(1)  |
| F(7)  | 7028(1) | 5059(1) | 3480(1) | 45(1)  |
| N(1)  | 3474(1) | 5244(1) | 2475(2) | 35(1)  |
| N(2)  | 1632(1) | 4699(1) | 2986(2) | 32(1)  |
| N(3)  | 5270(1) | 2884(1) | 3694(2) | 39(1)  |
| N(4)  | 4464(1) | 3121(1) | 5881(2) | 37(1)  |
| C(1)  | 7721(2) | 5792(1) | 1464(2) | 42(1)  |
| C(2)  | 6600(2) | 5628(1) | 1689(2) | 37(1)  |
| C(3)  | 5821(2) | 5817(1) | 921(2)  | 37(1)  |
| C(4)  | 4794(2) | 5677(1) | 1141(2) | 34(1)  |
| C(5)  | 4502(2) | 5362(1) | 2177(2) | 33(1)  |
| C(6)  | 5286(2) | 5141(1) | 2929(2) | 34(1)  |
| C(7)  | 6314(2) | 5272(1) | 2692(2) | 37(1)  |
| C(8)  | 2698(2) | 5797(1) | 2294(2) | 34(1)  |
| C(9)  | 1672(2) | 5573(1) | 2839(2) | 36(1)  |
| C(10) | 778(2)  | 5919(1) | 2123(2) | 44(1)  |
| C(11) | 1719(2) | 5991(1) | 3999(2) | 44(1)  |
| C(12) | 1548(2) | 4258(1) | 1908(2) | 33(1)  |

|       |          |         |         |       |
|-------|----------|---------|---------|-------|
| C(13) | 1682(2)  | 3357(1) | 2136(2) | 34(1) |
| C(14) | 2555(2)  | 3239(1) | 2996(2) | 34(1) |
| C(15) | 3588(2)  | 3100(1) | 2851(2) | 36(1) |
| C(16) | 4245(2)  | 3041(1) | 3828(2) | 34(1) |
| C(17) | 5840(2)  | 2839(1) | 4633(2) | 41(1) |
| C(18) | 5445(2)  | 2963(1) | 5717(2) | 39(1) |
| C(19) | 3845(2)  | 3148(1) | 4923(2) | 34(1) |
| C(20) | 2768(2)  | 3286(1) | 5052(2) | 35(1) |
| C(21) | 2153(2)  | 3323(1) | 4099(2) | 33(1) |
| C(22) | 1009(2)  | 3499(1) | 3957(2) | 34(1) |
| C(23) | 884(2)   | 4410(1) | 3815(2) | 34(1) |
| C(24) | 756(2)   | 3061(1) | 2826(2) | 35(1) |
| C(25) | -316(2)  | 3172(1) | 2297(2) | 35(1) |
| C(26) | -487(2)  | 3145(1) | 1126(2) | 38(1) |
| C(27) | -1476(2) | 3217(1) | 658(2)  | 40(1) |
| C(28) | -2311(2) | 3313(1) | 1351(2) | 41(1) |
| C(29) | -2158(2) | 3327(1) | 2506(2) | 43(1) |
| C(30) | -1168(2) | 3258(1) | 2987(2) | 38(1) |

---

**Bond lengths [Å] and angles [°] for 14a.**

---

|            |          |
|------------|----------|
| O(1)-C(8)  | 1.212(2) |
| F(1)-C(1)  | 1.351(4) |
| F(2)-C(1)  | 1.314(4) |
| F(3)-C(1)  | 1.303(5) |
| F(1A)-C(1) | 1.273(6) |
| F(2A)-C(1) | 1.315(5) |
| F(3A)-C(1) | 1.350(4) |
| F(4)-C(3)  | 1.345(3) |
| F(5)-C(4)  | 1.340(3) |
| F(6)-C(6)  | 1.334(3) |
| F(7)-C(7)  | 1.342(3) |
| N(1)-C(8)  | 1.380(3) |
| N(1)-C(5)  | 1.402(3) |
| N(1)-H(1)  | 0.88(3)  |
| N(2)-C(12) | 1.471(3) |
| N(2)-C(23) | 1.476(3) |
| N(2)-C(9)  | 1.478(2) |
| N(3)-C(17) | 1.317(3) |
| N(3)-C(16) | 1.368(3) |
| N(4)-C(18) | 1.319(3) |
| N(4)-C(19) | 1.368(3) |
| C(1)-C(2)  | 1.511(3) |
| C(2)-C(3)  | 1.375(3) |
| C(2)-C(7)  | 1.382(3) |



|              |          |
|--------------|----------|
| C(3)-C(4)    | 1.383(3) |
| C(4)-C(5)    | 1.392(3) |
| C(5)-C(6)    | 1.382(3) |
| C(6)-C(7)    | 1.388(3) |
| C(8)-C(9)    | 1.539(3) |
| C(9)-C(10)   | 1.529(3) |
| C(9)-C(11)   | 1.536(3) |
| C(10)-H(10A) | 0.9800   |
| C(10)-H(10B) | 0.9800   |
| C(10)-H(10C) | 0.9800   |
| C(11)-H(11A) | 0.9800   |
| C(11)-H(11B) | 0.9800   |
| C(11)-H(11C) | 0.9800   |
| C(12)-C(13)  | 1.544(3) |
| C(12)-H(12A) | 0.9900   |
| C(12)-H(12B) | 0.9900   |
| C(13)-C(14)  | 1.513(3) |
| C(13)-C(24)  | 1.549(3) |
| C(13)-H(13)  | 1.0000   |
| C(14)-C(15)  | 1.375(3) |
| C(14)-C(21)  | 1.420(3) |
| C(15)-C(16)  | 1.418(3) |
| C(15)-H(15)  | 0.9500   |
| C(16)-C(19)  | 1.414(3) |
| C(17)-C(18)  | 1.404(4) |
| C(17)-H(17)  | 0.9500   |
| C(18)-H(18)  | 0.9500   |
| C(19)-C(20)  | 1.427(3) |
| C(20)-C(21)  | 1.361(3) |
| C(20)-H(20)  | 0.9500   |
| C(21)-C(22)  | 1.518(3) |
| C(22)-C(23)  | 1.544(3) |
| C(22)-C(24)  | 1.549(3) |
| C(22)-H(22)  | 1.0000   |
| C(23)-H(23A) | 0.9900   |
| C(23)-H(23B) | 0.9900   |
| C(24)-C(25)  | 1.519(3) |
| C(24)-H(24)  | 1.0000   |
| C(25)-C(26)  | 1.392(3) |
| C(25)-C(30)  | 1.396(3) |
| C(26)-C(27)  | 1.388(3) |
| C(26)-H(26)  | 0.9500   |
| C(27)-C(28)  | 1.382(3) |
| C(27)-H(27)  | 0.9500   |
| C(28)-C(29)  | 1.370(4) |
| C(28)-H(28)  | 0.9500   |

|                  |            |
|------------------|------------|
| C(29)-C(30)      | 1.394(3)   |
| C(29)-H(29)      | 0.9500     |
| C(30)-H(30)      | 0.9500     |
| C(8)-N(1)-C(5)   | 124.14(17) |
| C(8)-N(1)-H(1)   | 115.9(17)  |
| C(5)-N(1)-H(1)   | 119.0(17)  |
| C(12)-N(2)-C(23) | 111.71(16) |
| C(12)-N(2)-C(9)  | 113.51(17) |
| C(23)-N(2)-C(9)  | 115.42(16) |
| C(17)-N(3)-C(16) | 116.1(2)   |
| C(18)-N(4)-C(19) | 115.7(2)   |
| F(1A)-C(1)-F(3)  | 107.2(4)   |
| F(1A)-C(1)-F(2)  | 113.8(4)   |
| F(3)-C(1)-F(2)   | 93.3(4)    |
| F(1A)-C(1)-F(2A) | 108.0(4)   |
| F(3)-C(1)-F(2A)  | 106.6(4)   |
| F(2)-C(1)-F(2A)  | 13.3(4)    |
| F(1A)-C(1)-F(3A) | 92.6(4)    |
| F(3)-C(1)-F(3A)  | 16.9(4)    |
| F(2)-C(1)-F(3A)  | 107.4(3)   |
| F(2A)-C(1)-F(3A) | 120.4(3)   |
| F(1A)-C(1)-F(1)  | 10.6(4)    |
| F(3)-C(1)-F(1)   | 116.6(4)   |
| F(2)-C(1)-F(1)   | 106.9(3)   |
| F(2A)-C(1)-F(1)  | 99.6(3)    |
| F(3A)-C(1)-F(1)  | 102.7(2)   |
| F(1A)-C(1)-C(2)  | 114.4(3)   |
| F(3)-C(1)-C(2)   | 111.1(3)   |
| F(2)-C(1)-C(2)   | 114.8(2)   |
| F(2A)-C(1)-C(2)  | 109.2(2)   |
| F(3A)-C(1)-C(2)  | 111.4(2)   |
| F(1)-C(1)-C(2)   | 112.7(2)   |
| C(3)-C(2)-C(7)   | 116.98(19) |
| C(3)-C(2)-C(1)   | 122.4(2)   |
| C(7)-C(2)-C(1)   | 120.6(2)   |
| F(4)-C(3)-C(2)   | 120.99(19) |
| F(4)-C(3)-C(4)   | 116.8(2)   |
| C(2)-C(3)-C(4)   | 122.1(2)   |
| F(5)-C(4)-C(3)   | 118.0(2)   |
| F(5)-C(4)-C(5)   | 120.96(18) |
| C(3)-C(4)-C(5)   | 120.9(2)   |
| C(6)-C(5)-C(4)   | 116.89(18) |
| C(6)-C(5)-N(1)   | 119.3(2)   |
| C(4)-C(5)-N(1)   | 123.7(2)   |
| F(6)-C(6)-C(5)   | 119.29(18) |
| F(6)-C(6)-C(7)   | 119.1(2)   |

|                     |            |
|---------------------|------------|
| C(5)-C(6)-C(7)      | 121.5(2)   |
| F(7)-C(7)-C(2)      | 120.77(19) |
| F(7)-C(7)-C(6)      | 117.8(2)   |
| C(2)-C(7)-C(6)      | 121.4(2)   |
| O(1)-C(8)-N(1)      | 123.12(19) |
| O(1)-C(8)-C(9)      | 122.69(17) |
| N(1)-C(8)-C(9)      | 114.01(17) |
| N(2)-C(9)-C(10)     | 114.46(17) |
| N(2)-C(9)-C(11)     | 110.44(19) |
| C(10)-C(9)-C(11)    | 109.20(18) |
| N(2)-C(9)-C(8)      | 108.89(15) |
| C(10)-C(9)-C(8)     | 109.18(18) |
| C(11)-C(9)-C(8)     | 104.14(17) |
| C(9)-C(10)-H(10A)   | 109.5      |
| C(9)-C(10)-H(10B)   | 109.5      |
| H(10A)-C(10)-H(10B) | 109.5      |
| C(9)-C(10)-H(10C)   | 109.5      |
| H(10A)-C(10)-H(10C) | 109.5      |
| H(10B)-C(10)-H(10C) | 109.5      |
| C(9)-C(11)-H(11A)   | 109.5      |
| C(9)-C(11)-H(11B)   | 109.5      |
| H(11A)-C(11)-H(11B) | 109.5      |
| C(9)-C(11)-H(11C)   | 109.5      |
| H(11A)-C(11)-H(11C) | 109.5      |
| H(11B)-C(11)-H(11C) | 109.5      |
| N(2)-C(12)-C(13)    | 109.67(17) |
| N(2)-C(12)-H(12A)   | 109.7      |
| C(13)-C(12)-H(12A)  | 109.7      |
| N(2)-C(12)-H(12B)   | 109.7      |
| C(13)-C(12)-H(12B)  | 109.7      |
| H(12A)-C(12)-H(12B) | 108.2      |
| C(14)-C(13)-C(12)   | 108.82(16) |
| C(14)-C(13)-C(24)   | 100.59(18) |
| C(12)-C(13)-C(24)   | 108.61(16) |
| C(14)-C(13)-H(13)   | 112.7      |
| C(12)-C(13)-H(13)   | 112.7      |
| C(24)-C(13)-H(13)   | 112.7      |
| C(15)-C(14)-C(21)   | 120.9(2)   |
| C(15)-C(14)-C(13)   | 130.8(2)   |
| C(21)-C(14)-C(13)   | 108.26(18) |
| C(14)-C(15)-C(16)   | 118.5(2)   |
| C(14)-C(15)-H(15)   | 120.7      |
| C(16)-C(15)-H(15)   | 120.7      |
| N(3)-C(16)-C(19)    | 120.7(2)   |
| N(3)-C(16)-C(15)    | 119.0(2)   |
| C(19)-C(16)-C(15)   | 120.32(19) |

|                     |            |
|---------------------|------------|
| N(3)-C(17)-C(18)    | 123.0(2)   |
| N(3)-C(17)-H(17)    | 118.5      |
| C(18)-C(17)-H(17)   | 118.5      |
| N(4)-C(18)-C(17)    | 122.7(2)   |
| N(4)-C(18)-H(18)    | 118.7      |
| C(17)-C(18)-H(18)   | 118.7      |
| N(4)-C(19)-C(16)    | 121.75(19) |
| N(4)-C(19)-C(20)    | 118.2(2)   |
| C(16)-C(19)-C(20)   | 120.0(2)   |
| C(21)-C(20)-C(19)   | 118.3(2)   |
| C(21)-C(20)-H(20)   | 120.9      |
| C(19)-C(20)-H(20)   | 120.9      |
| C(20)-C(21)-C(14)   | 121.92(19) |
| C(20)-C(21)-C(22)   | 130.5(2)   |
| C(14)-C(21)-C(22)   | 107.46(19) |
| C(21)-C(22)-C(23)   | 107.64(16) |
| C(21)-C(22)-C(24)   | 100.77(17) |
| C(23)-C(22)-C(24)   | 110.88(18) |
| C(21)-C(22)-H(22)   | 112.3      |
| C(23)-C(22)-H(22)   | 112.3      |
| C(24)-C(22)-H(22)   | 112.3      |
| N(2)-C(23)-C(22)    | 109.16(16) |
| N(2)-C(23)-H(23A)   | 109.8      |
| C(22)-C(23)-H(23A)  | 109.8      |
| N(2)-C(23)-H(23B)   | 109.8      |
| C(22)-C(23)-H(23B)  | 109.8      |
| H(23A)-C(23)-H(23B) | 108.3      |
| C(25)-C(24)-C(13)   | 117.31(19) |
| C(25)-C(24)-C(22)   | 117.74(17) |
| C(13)-C(24)-C(22)   | 98.64(16)  |
| C(25)-C(24)-H(24)   | 107.5      |
| C(13)-C(24)-H(24)   | 107.5      |
| C(22)-C(24)-H(24)   | 107.5      |
| C(26)-C(25)-C(30)   | 118.1(2)   |
| C(26)-C(25)-C(24)   | 121.5(2)   |
| C(30)-C(25)-C(24)   | 120.2(2)   |
| C(27)-C(26)-C(25)   | 120.8(2)   |
| C(27)-C(26)-H(26)   | 119.6      |
| C(25)-C(26)-H(26)   | 119.6      |
| C(28)-C(27)-C(26)   | 120.4(2)   |
| C(28)-C(27)-H(27)   | 119.8      |
| C(26)-C(27)-H(27)   | 119.8      |
| C(29)-C(28)-C(27)   | 119.5(2)   |
| C(29)-C(28)-H(28)   | 120.2      |
| C(27)-C(28)-H(28)   | 120.2      |
| C(28)-C(29)-C(30)   | 120.7(2)   |

|                   |          |
|-------------------|----------|
| C(28)-C(29)-H(29) | 119.7    |
| C(30)-C(29)-H(29) | 119.7    |
| C(29)-C(30)-C(25) | 120.4(2) |
| C(29)-C(30)-H(30) | 119.8    |
| C(25)-C(30)-H(30) | 119.8    |

---

**Symmetry transformations used to generate equivalent atoms for 14a:**

**Anisotropic displacement parameters ( $\text{Å}^2 \times 10^3$ ) for 14a.**

The anisotropic displacement factor exponent takes the form:

$$-2 \pi^2 [ h^2 a^{*2} U_{11} + \dots + 2 h k a^* b^* U_{12} ]$$

---

|       | U11   | U22    | U33    | U23    | U13   | U12    |
|-------|-------|--------|--------|--------|-------|--------|
| O(1)  | 38(1) | 27(1)  | 56(1)  | 4(1)   | 9(1)  | -1(1)  |
| F(1)  | 37(1) | 45(2)  | 29(1)  | 11(1)  | 7(1)  | -15(1) |
| F(2)  | 38(2) | 30(2)  | 141(4) | -10(2) | 17(2) | -1(1)  |
| F(3)  | 37(2) | 225(5) | 73(3)  | -18(3) | 1(2)  | -33(3) |
| F(1A) | 51(2) | 41(2)  | 219(7) | -3(3)  | 26(3) | -9(2)  |
| F(2A) | 48(2) | 39(2)  | 104(3) | -4(2)  | 49(2) | 4(2)   |
| F(3A) | 33(2) | 37(1)  | 47(2)  | -4(1)  | 7(1)  | -9(1)  |
| F(4)  | 46(1) | 45(1)  | 47(1)  | 5(1)   | 13(1) | -5(1)  |
| F(5)  | 38(1) | 40(1)  | 44(1)  | 3(1)   | -4(1) | 3(1)   |
| F(6)  | 44(1) | 41(1)  | 43(1)  | 5(1)   | 5(1)  | 2(1)   |
| F(7)  | 36(1) | 47(1)  | 52(1)  | -3(1)  | -8(1) | 7(1)   |
| N(1)  | 28(1) | 27(1)  | 51(1)  | 4(1)   | 8(1)  | 0(1)   |
| N(2)  | 31(1) | 23(1)  | 42(1)  | -2(1)  | 9(1)  | -1(1)  |
| N(3)  | 35(1) | 35(1)  | 48(1)  | 1(1)   | 5(1)  | 4(1)   |
| N(4)  | 35(1) | 30(1)  | 44(1)  | 3(1)   | 2(1)  | 0(1)   |
| C(1)  | 33(1) | 44(1)  | 50(1)  | -7(1)  | 6(1)  | 0(1)   |
| C(2)  | 31(1) | 32(1)  | 47(1)  | -5(1)  | 6(1)  | -2(1)  |
| C(3)  | 37(1) | 32(1)  | 43(1)  | -1(1)  | 9(1)  | -1(1)  |
| C(4)  | 31(1) | 30(1)  | 42(1)  | 0(1)   | 3(1)  | 0(1)   |
| C(5)  | 28(1) | 29(1)  | 43(1)  | -2(1)  | 5(1)  | -1(1)  |
| C(6)  | 34(1) | 29(1)  | 40(1)  | 0(1)   | 5(1)  | 1(1)   |
| C(7)  | 31(1) | 33(1)  | 47(1)  | -5(1)  | -3(1) | 5(1)   |
| C(8)  | 30(1) | 25(1)  | 45(1)  | -1(1)  | 4(1)  | -1(1)  |
| C(9)  | 32(1) | 24(1)  | 52(1)  | 1(1)   | 6(1)  | 1(1)   |
| C(10) | 32(1) | 30(1)  | 69(2)  | 8(1)   | 8(1)  | 0(1)   |
| C(11) | 45(1) | 31(1)  | 56(2)  | -8(1)  | 15(1) | -4(1)  |
| C(12) | 31(1) | 29(1)  | 38(1)  | 2(1)   | 6(1)  | -1(1)  |
| C(13) | 34(1) | 28(1)  | 41(1)  | -3(1)  | 4(1)  | 0(1)   |
| C(14) | 33(1) | 24(1)  | 45(1)  | -2(1)  | 8(1)  | 2(1)   |

|       |       |       |       |       |       |       |
|-------|-------|-------|-------|-------|-------|-------|
| C(15) | 36(1) | 29(1) | 44(1) | -2(1) | 6(1)  | 2(1)  |
| C(16) | 33(1) | 25(1) | 43(1) | -1(1) | 6(1)  | 2(1)  |
| C(17) | 36(1) | 36(1) | 51(1) | 3(1)  | 3(1)  | 4(1)  |
| C(18) | 38(1) | 33(1) | 45(1) | 4(1)  | 1(1)  | 1(1)  |
| C(19) | 36(1) | 24(1) | 44(1) | 2(1)  | 6(1)  | 0(1)  |
| C(20) | 34(1) | 28(1) | 44(1) | 1(1)  | 10(1) | 0(1)  |
| C(21) | 32(1) | 24(1) | 43(1) | 2(1)  | 8(1)  | 1(1)  |
| C(22) | 33(1) | 29(1) | 41(1) | 1(1)  | 8(1)  | -1(1) |
| C(23) | 30(1) | 30(1) | 42(1) | -2(1) | 10(1) | -1(1) |
| C(24) | 37(1) | 24(1) | 44(1) | 0(1)  | 6(1)  | 1(1)  |
| C(25) | 36(1) | 24(1) | 44(1) | -1(1) | 3(1)  | -4(1) |
| C(26) | 38(1) | 28(1) | 49(1) | 2(1)  | 6(1)  | -3(1) |
| C(27) | 46(1) | 30(1) | 44(1) | 1(1)  | -2(1) | -5(1) |
| C(28) | 39(1) | 25(1) | 58(2) | 3(1)  | -4(1) | -4(1) |
| C(29) | 37(1) | 33(1) | 59(2) | 4(1)  | 6(1)  | 1(1)  |
| C(30) | 37(1) | 32(1) | 44(1) | 4(1)  | 3(1)  | -2(1) |

---

**Hydrogen coordinates ( x 10<sup>4</sup>) and isotropic for 14a**  
displacement parameters (A<sup>2</sup> x 10<sup>3</sup>) for 14a.

|        | x        | y        | z        | U(eq) |
|--------|----------|----------|----------|-------|
| H(1)   | 3320(20) | 4839(16) | 2910(20) | 41(7) |
| H(10A) | 800      | 5706     | 1350     | 65    |
| H(10B) | 839      | 6501     | 2099     | 65    |
| H(10C) | 122      | 5773     | 2462     | 65    |
| H(11A) | 1043     | 5958     | 4350     | 65    |
| H(11B) | 1906     | 6552     | 3897     | 65    |
| H(11C) | 2238     | 5731     | 4491     | 65    |
| H(12A) | 2085     | 4444     | 1388     | 39    |
| H(12B) | 864      | 4358     | 1541     | 39    |
| H(13)  | 1777     | 3043     | 1424     | 41    |
| H(15)  | 3856     | 3045     | 2112     | 43    |
| H(17)  | 6552     | 2716     | 4575     | 49    |
| H(18)  | 5902     | 2933     | 6359     | 47    |
| H(20)  | 2488     | 3351     | 5784     | 42    |
| H(22)  | 603      | 3286     | 4601     | 41    |
| H(23A) | 174      | 4535     | 3545     | 41    |
| H(23B) | 1007     | 4677     | 4555     | 41    |
| H(24)  | 856      | 2478     | 2965     | 42    |
| H(26)  | 81       | 3077     | 641      | 46    |
| H(27)  | -1579    | 3201     | -143     | 48    |
| H(28)  | -2986    | 3368     | 1029     | 49    |
| H(29)  | -2731    | 3386     | 2984     | 51    |
| H(30)  | -1073    | 3269     | 3789     | 45    |

---

**Torsion angles [°] for 14a.**

---

|                       |             |
|-----------------------|-------------|
| F(1A)-C(1)-C(2)-C(3)  | 30.3(4)     |
| F(3)-C(1)-C(2)-C(3)   | 151.8(4)    |
| F(2)-C(1)-C(2)-C(3)   | -103.9(4)   |
| F(2A)-C(1)-C(2)-C(3)  | -90.9(4)    |
| F(3A)-C(1)-C(2)-C(3)  | 133.7(3)    |
| F(1)-C(1)-C(2)-C(3)   | 18.8(3)     |
| F(1A)-C(1)-C(2)-C(7)  | -149.9(4)   |
| F(3)-C(1)-C(2)-C(7)   | -28.4(4)    |
| F(2)-C(1)-C(2)-C(7)   | 75.9(4)     |
| F(2A)-C(1)-C(2)-C(7)  | 88.9(4)     |
| F(3A)-C(1)-C(2)-C(7)  | -46.5(3)    |
| F(1)-C(1)-C(2)-C(7)   | -161.4(2)   |
| C(7)-C(2)-C(3)-F(4)   | -175.20(18) |
| C(1)-C(2)-C(3)-F(4)   | 4.6(3)      |
| C(7)-C(2)-C(3)-C(4)   | 1.3(3)      |
| C(1)-C(2)-C(3)-C(4)   | -178.87(19) |
| F(4)-C(3)-C(4)-F(5)   | 2.7(3)      |
| C(2)-C(3)-C(4)-F(5)   | -173.94(19) |
| F(4)-C(3)-C(4)-C(5)   | 179.06(18)  |
| C(2)-C(3)-C(4)-C(5)   | 2.4(3)      |
| F(5)-C(4)-C(5)-C(6)   | 171.32(18)  |
| C(3)-C(4)-C(5)-C(6)   | -4.9(3)     |
| F(5)-C(4)-C(5)-N(1)   | -7.1(3)     |
| C(3)-C(4)-C(5)-N(1)   | 176.60(19)  |
| C(8)-N(1)-C(5)-C(6)   | 136.8(2)    |
| C(8)-N(1)-C(5)-C(4)   | -44.8(3)    |
| C(4)-C(5)-C(6)-F(6)   | -179.05(18) |
| N(1)-C(5)-C(6)-F(6)   | -0.5(3)     |
| C(4)-C(5)-C(6)-C(7)   | 3.9(3)      |
| N(1)-C(5)-C(6)-C(7)   | -177.55(18) |
| C(3)-C(2)-C(7)-F(7)   | 179.13(19)  |
| C(1)-C(2)-C(7)-F(7)   | -0.7(3)     |
| C(3)-C(2)-C(7)-C(6)   | -2.3(3)     |
| C(1)-C(2)-C(7)-C(6)   | 177.83(19)  |
| F(6)-C(6)-C(7)-F(7)   | 1.2(3)      |
| C(5)-C(6)-C(7)-F(7)   | 178.26(18)  |
| F(6)-C(6)-C(7)-C(2)   | -177.35(19) |
| C(5)-C(6)-C(7)-C(2)   | -0.3(3)     |
| C(5)-N(1)-C(8)-O(1)   | 3.0(4)      |
| C(5)-N(1)-C(8)-C(9)   | -172.2(2)   |
| C(12)-N(2)-C(9)-C(10) | 54.2(2)     |
| C(23)-N(2)-C(9)-C(10) | -76.6(2)    |

|                         |             |
|-------------------------|-------------|
| C(12)-N(2)-C(9)-C(11)   | 177.89(17)  |
| C(23)-N(2)-C(9)-C(11)   | 47.1(2)     |
| C(12)-N(2)-C(9)-C(8)    | -68.3(2)    |
| C(23)-N(2)-C(9)-C(8)    | 160.87(18)  |
| O(1)-C(8)-C(9)-N(2)     | 160.6(2)    |
| N(1)-C(8)-C(9)-N(2)     | -24.1(3)    |
| O(1)-C(8)-C(9)-C(10)    | 35.0(3)     |
| N(1)-C(8)-C(9)-C(10)    | -149.75(19) |
| O(1)-C(8)-C(9)-C(11)    | -81.5(3)    |
| N(1)-C(8)-C(9)-C(11)    | 93.7(2)     |
| C(23)-N(2)-C(12)-C(13)  | -56.1(2)    |
| C(9)-N(2)-C(12)-C(13)   | 171.29(16)  |
| N(2)-C(12)-C(13)-C(14)  | -42.3(2)    |
| N(2)-C(12)-C(13)-C(24)  | 66.3(2)     |
| C(12)-C(13)-C(14)-C(15) | -93.2(3)    |
| C(24)-C(13)-C(14)-C(15) | 152.8(2)    |
| C(12)-C(13)-C(14)-C(21) | 84.8(2)     |
| C(24)-C(13)-C(14)-C(21) | -29.22(19)  |
| C(21)-C(14)-C(15)-C(16) | 0.1(3)      |
| C(13)-C(14)-C(15)-C(16) | 177.79(19)  |
| C(17)-N(3)-C(16)-C(19)  | 0.2(3)      |
| C(17)-N(3)-C(16)-C(15)  | 179.82(19)  |
| C(14)-C(15)-C(16)-N(3)  | 178.51(18)  |
| C(14)-C(15)-C(16)-C(19) | -1.9(3)     |
| C(16)-N(3)-C(17)-C(18)  | -1.8(3)     |
| C(19)-N(4)-C(18)-C(17)  | 0.6(3)      |
| N(3)-C(17)-C(18)-N(4)   | 1.4(3)      |
| C(18)-N(4)-C(19)-C(16)  | -2.2(3)     |
| C(18)-N(4)-C(19)-C(20)  | 177.71(18)  |
| N(3)-C(16)-C(19)-N(4)   | 1.8(3)      |
| C(15)-C(16)-C(19)-N(4)  | -177.79(18) |
| N(3)-C(16)-C(19)-C(20)  | -178.05(18) |
| C(15)-C(16)-C(19)-C(20) | 2.3(3)      |
| N(4)-C(19)-C(20)-C(21)  | 179.18(17)  |
| C(16)-C(19)-C(20)-C(21) | -0.9(3)     |
| C(19)-C(20)-C(21)-C(14) | -0.9(3)     |
| C(19)-C(20)-C(21)-C(22) | -176.71(18) |
| C(15)-C(14)-C(21)-C(20) | 1.3(3)      |
| C(13)-C(14)-C(21)-C(20) | -176.83(17) |
| C(15)-C(14)-C(21)-C(22) | 178.02(18)  |
| C(13)-C(14)-C(21)-C(22) | -0.2(2)     |
| C(20)-C(21)-C(22)-C(23) | 89.6(3)     |
| C(14)-C(21)-C(22)-C(23) | -86.7(2)    |
| C(20)-C(21)-C(22)-C(24) | -154.2(2)   |
| C(14)-C(21)-C(22)-C(24) | 29.49(19)   |
| C(12)-N(2)-C(23)-C(22)  | 53.7(2)     |



|                         |             |
|-------------------------|-------------|
| C(9)-N(2)-C(23)-C(22)   | -174.64(18) |
| C(21)-C(22)-C(23)-N(2)  | 46.4(2)     |
| C(24)-C(22)-C(23)-N(2)  | -62.9(2)    |
| C(14)-C(13)-C(24)-C(25) | 173.08(17)  |
| C(12)-C(13)-C(24)-C(25) | 58.9(2)     |
| C(14)-C(13)-C(24)-C(22) | 45.61(17)   |
| C(12)-C(13)-C(24)-C(22) | -68.6(2)    |
| C(21)-C(22)-C(24)-C(25) | -172.99(17) |
| C(23)-C(22)-C(24)-C(25) | -59.2(2)    |
| C(21)-C(22)-C(24)-C(13) | -45.82(18)  |
| C(23)-C(22)-C(24)-C(13) | 67.93(19)   |
| C(13)-C(24)-C(25)-C(26) | 31.8(3)     |
| C(22)-C(24)-C(25)-C(26) | 149.32(19)  |
| C(13)-C(24)-C(25)-C(30) | -151.96(19) |
| C(22)-C(24)-C(25)-C(30) | -34.4(3)    |
| C(30)-C(25)-C(26)-C(27) | 1.2(3)      |
| C(24)-C(25)-C(26)-C(27) | 177.54(18)  |
| C(25)-C(26)-C(27)-C(28) | -0.3(3)     |
| C(26)-C(27)-C(28)-C(29) | -0.7(3)     |
| C(27)-C(28)-C(29)-C(30) | 0.9(3)      |
| C(28)-C(29)-C(30)-C(25) | 0.0(3)      |
| C(26)-C(25)-C(30)-C(29) | -1.0(3)     |
| C(24)-C(25)-C(30)-C(29) | -177.43(18) |

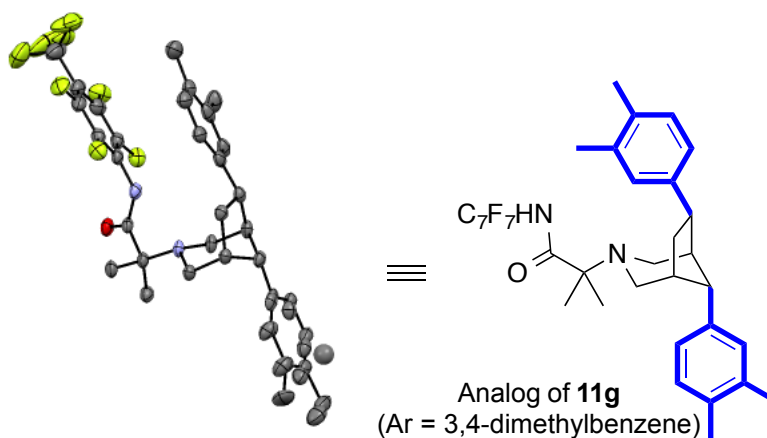

**Figure S5.** Structure determination of an analog compound of **11g**.

Colorless plates of **analog of 11g** (Aryl group is 3,4-dimethylbenzene instead of phenyl) were grown from a hexane solution of the compound at 25 °C. A crystal of dimensions 0.18 x 0.12 x 0.06 mm was mounted on a Rigaku AFC10K Saturn 944+ CCD-based X-ray diffractometer equipped with a low temperature device and Micromax-007HF Cu-target micro-focus rotating anode ( $\lambda = 1.54187 \text{ \AA}$ ) operated at 1.2 kW power (40 kV, 30 mA). The X-ray

intensities were measured at 85(1) K with the detector placed at a distance 42.00 mm from the crystal. A total of 2028 images were collected with an oscillation width of 1.0° in  $\omega$ . The exposure times were 1 sec. for the low angle images, 6 sec. for high angle. The integration of the data yielded a total of 23406 reflections to a maximum  $2\theta$  value of 136.48° of which 5416 were independent and 4654 were greater than  $2\sigma(I)$ . The final cell constants (Table S13) were based on the xyz centroids 12821 reflections above  $10\sigma(I)$ . Analysis of the data showed negligible decay during data collection; the data were processed with CrystalClear 2.0 and corrected for absorption. The structure was solved and refined with the Bruker SHELXTL (version 2014/6) software package, using the space group P1bar with  $Z = 2$  for the formula  $C_{34}H_{35}N_2OF_7$ . All non-hydrogen atoms were refined anisotropically with the hydrogen atoms placed in idealized positions. Full matrix least-squares refinement based on  $F^2$  converged at  $R1 = 0.0730$  and  $wR2 = 0.1995$  [based on  $I > 2\sigma(I)$ ],  $R1 = 0.0792$  and  $wR2 = 0.2074$  for all data. Additional details are presented below. Acknowledgement is made for funding from NSF grant CHE-0840456 for X-ray instrumentation.

**Table S13.** Crystal data and structure refinement for analog of **11g**.

|                                 |                                                                                                                                                      |
|---------------------------------|------------------------------------------------------------------------------------------------------------------------------------------------------|
| Empirical formula               | $C_{34}H_{35}F_7N_2O$                                                                                                                                |
| Formula weight                  | 620.64                                                                                                                                               |
| Temperature                     | 85(2) K                                                                                                                                              |
| Wavelength                      | 1.54178 Å                                                                                                                                            |
| Crystal system, space group     | Triclinic, P-1                                                                                                                                       |
| Unit cell dimensions            | $a = 9.1197(2)$ Å $\alpha = 69.520(5)^\circ$ .<br>$b = 12.3985(2)$ Å $\beta = 85.664(6)^\circ$ .<br>$c = 14.3863(10)$ Å $\gamma = 86.069(6)^\circ$ . |
| Volume                          | $1517.95(12)$ Å <sup>3</sup>                                                                                                                         |
| Z, Calculated density           | 2, 1.358 Mg/m <sup>3</sup>                                                                                                                           |
| Absorption coefficient          | $0.951$ mm <sup>-1</sup>                                                                                                                             |
| F(000)                          | 648                                                                                                                                                  |
| Crystal size                    | 0.180 x 0.120 x 0.060 mm                                                                                                                             |
| Theta range for data collection | 3.284 to 68.240 °.                                                                                                                                   |
| Limiting indices                | $-10 \leq h \leq 10$ , $-14 \leq k \leq 14$ , $-15 \leq l \leq 16$                                                                                   |
| Reflections collected / unique  | 23406 / 5416 [ $R(\text{int}) = 0.0602$ ]                                                                                                            |
| Completeness to theta =         | 67.679 98.0 %                                                                                                                                        |
| Absorption correction           | Semi-empirical from equivalents                                                                                                                      |
| Max. and min. transmission      | 0.944 and 0.729                                                                                                                                      |
| Refinement method               | Full-matrix least-squares on $F^2$                                                                                                                   |
| Data / restraints / parameters  | 5416 / 492 / 501                                                                                                                                     |

|                                      |                                       |
|--------------------------------------|---------------------------------------|
| Goodness-of-fit on $F^2$             | 1.082                                 |
| Final R indices [ $I > 2\sigma(I)$ ] | $R1 = 0.0730$ , $wR2 = 0.1995$        |
| R indices (all data)                 | $R1 = 0.0792$ , $wR2 = 0.2074$        |
| Extinction coefficient               | 0.0123(9)                             |
| Largest diff. peak and hole          | 0.865 and -0.491 e. $\text{\AA}^{-3}$ |

**Atomic coordinates ( $\times 10^4$ ) and equivalent isotropic displacement parameters ( $\text{\AA}^2 \times 10^3$ ) for analog of 11g.**  
**U(eq) is defined as one third of the trace of the orthogonalized Uij tensor.**

|       | x        | y       | z       | U(eq) |
|-------|----------|---------|---------|-------|
| O(1)  | 4234(1)  | 2157(1) | 4480(1) | 33(1) |
| N(1)  | 6027(2)  | 1797(1) | 5577(1) | 30(1) |
| N(2)  | 8151(2)  | 2209(1) | 4159(1) | 27(1) |
| C(2)  | 3214(2)  | 1112(2) | 8167(2) | 44(1) |
| C(3)  | 4367(2)  | 359(2)  | 8085(2) | 42(1) |
| C(4)  | 5287(2)  | 600(2)  | 7243(2) | 34(1) |
| C(5)  | 5101(2)  | 1604(2) | 6432(1) | 29(1) |
| C(6)  | 3973(2)  | 2377(2) | 6518(2) | 32(1) |
| C(7)  | 3041(2)  | 2133(2) | 7372(2) | 40(1) |
| C(8)  | 5530(2)  | 1997(1) | 4653(1) | 27(1) |
| C(9)  | 6756(2)  | 1859(2) | 3904(1) | 28(1) |
| C(10) | 6309(2)  | 2509(2) | 2844(2) | 35(1) |
| C(11) | 6828(2)  | 561(2)  | 4084(2) | 33(1) |
| C(12) | 8205(2)  | 3464(2) | 3904(2) | 31(1) |
| C(13) | 9614(2)  | 3791(2) | 4244(2) | 31(1) |
| C(14) | 9957(2)  | 3083(2) | 5330(1) | 28(1) |
| C(15) | 10628(2) | 1920(2) | 5273(1) | 28(1) |
| C(16) | 10846(2) | 2110(2) | 4155(1) | 29(1) |
| C(17) | 9505(2)  | 1730(2) | 3794(1) | 30(1) |
| C(18) | 8781(2)  | 3003(2) | 6157(2) | 33(1) |
| C(19) | 7738(2)  | 3888(2) | 6106(2) | 39(1) |
| C(20) | 6743(2)  | 3852(2) | 6925(2) | 42(1) |
| C(21) | 6831(2)  | 2913(2) | 7808(2) | 44(1) |
| C(22) | 7836(2)  | 2034(2) | 7858(2) | 45(1) |
| C(23) | 8801(2)  | 2064(2) | 7053(2) | 39(1) |
| C(24) | 5674(2)  | 4843(2) | 6836(2) | 49(1) |
| C(25) | 5838(3)  | 2886(2) | 8712(2) | 54(1) |
| C(26) | 10972(2) | 3419(2) | 3698(1) | 31(1) |
| C(27) | 11049(4) | 4050(3) | 2592(3) | 28(1) |
| C(28) | 11866(4) | 3507(3) | 1995(3) | 35(1) |
| C(29) | 12177(4) | 4057(4) | 981(3)  | 41(1) |
| C(30) | 11683(4) | 5192(4) | 536(3)  | 42(1) |
| C(31) | 10853(4) | 5725(3) | 1115(3) | 39(1) |

C(32) 10548(4) 5173(3) 2120(3) 31(1)  
C(33) 13082(5) 3419(5) 405(3) 67(1)  
C(34) 12009(5) 5843(5) -548(3) 62(1)  
C(26A) 10972(2) 3419(2) 3698(1) 31(1)  
C(27A) 11346(5) 3799(4) 2556(4) 28(1)  
C(28A) 12180(6) 3123(5) 2093(4) 36(1)  
C(29A) 12577(6) 3586(5) 1092(5) 43(1)  
C(30A) 12133(6) 4705(5) 501(4) 40(1)  
C(31A) 11299(6) 5373(5) 939(5) 40(1)  
C(33A) 10773(8) 6595(6) 380(5) 56(2)  
C(32A) 10908(6) 4899(4) 1979(4) 34(1)  
C(34A) 12609(8) 5200(7) -596(5) 59(2)  
C(1) 2232(3) 797(3) 9105(2) 64(1)  
F(1) 1837(5) -346(4) 9332(4) 101(2)  
F(2) 977(4) 1270(6) 9079(3) 114(2)  
F(3) 2910(5) 796(5) 9866(3) 104(1)  
C(1A) 2232(3) 797(3) 9105(2) 64(1)  
F(1A) 1359(4) -7(4) 9179(3) 91(1)  
F(2A) 1281(4) 1729(4) 9073(3) 77(1)  
F(3A) 2979(4) 510(4) 9900(2) 75(1)  
F(4) 2006(1) 2935(1) 7402(1) 56(1)  
F(5) 3782(1) 3394(1) 5794(1) 39(1)  
F(6) 6369(1) -170(1) 7194(1) 43(1)  
F(7) 4594(2) -649(1) 8828(1) 57(1)

---

**Bond lengths [Å] and angles [°] for analog 11g.**

---

O(1)-C(8) 1.215(2)  
N(1)-C(8) 1.371(2)  
N(1)-C(5) 1.395(2)  
N(1)-H(1A) 0.8800  
N(2)-C(12) 1.472(2)  
N(2)-C(17) 1.474(2)  
N(2)-C(9) 1.483(2)  
C(2)-C(3) 1.384(3)  
C(2)-C(7) 1.386(3)  
C(2)-C(1A) 1.508(3)  
C(2)-C(1) 1.508(3)  
C(3)-F(7) 1.345(2)  
C(3)-C(4) 1.374(3)  
C(4)-F(6) 1.341(2)  
C(4)-C(5) 1.388(3)  
C(5)-C(6) 1.386(3)  
C(6)-F(5) 1.335(2)  
C(6)-C(7) 1.393(3)

C(7)-F(4) 1.333(3)  
C(8)-C(9) 1.537(3)  
C(9)-C(10) 1.526(3)  
C(9)-C(11) 1.536(3)  
C(10)-H(10A) 0.9800  
C(10)-H(10B) 0.9800  
C(10)-H(10C) 0.9800  
C(11)-H(11A) 0.9800  
C(11)-H(11B) 0.9800  
C(11)-H(11C) 0.9800  
C(12)-C(13) 1.536(3)  
C(12)-H(12A) 0.9900  
C(12)-H(12B) 0.9900  
C(13)-C(14) 1.544(3)  
C(13)-C(26A) 1.547(3)  
C(13)-C(26) 1.547(3)  
C(13)-H(13) 1.0000  
C(14)-C(18) 1.522(3)  
C(14)-C(15) 1.555(3)  
C(14)-H(14) 1.0000  
C(15)-C(16) 1.540(3)  
C(15)-H(15A) 0.9900  
C(15)-H(15B) 0.9900  
C(16)-C(17) 1.527(3)  
C(16)-C(26A) 1.531(3)  
C(16)-C(26) 1.531(3)  
C(16)-H(16) 1.0000  
C(17)-H(17A) 0.9900  
C(17)-H(17B) 0.9900  
C(18)-C(19) 1.387(3)  
C(18)-C(23) 1.402(3)  
C(19)-C(20) 1.422(3)  
C(19)-H(19) 0.9500  
C(20)-C(21) 1.393(3)  
C(20)-C(24) 1.491(3)  
C(21)-C(22) 1.361(3)  
C(21)-C(25) 1.520(3)  
C(22)-C(23) 1.392(3)  
C(22)-H(22) 0.9500  
C(23)-H(23) 0.9500  
C(24)-H(24A) 0.9800  
C(24)-H(24B) 0.9800  
C(24)-H(24C) 0.9800  
C(25)-H(25A) 0.9800  
C(25)-H(25B) 0.9800  
C(25)-H(25C) 0.9800

C(26)-C(27) 1.507(4)  
C(26)-H(26) 1.0000  
C(27)-C(32) 1.381(5)  
C(27)-C(28) 1.408(5)  
C(28)-C(29) 1.393(5)  
C(28)-H(28) 0.9500  
C(29)-C(30) 1.385(6)  
C(29)-C(33) 1.504(6)  
C(30)-C(31) 1.388(6)  
C(30)-C(34) 1.501(5)  
C(31)-C(32) 1.383(5)  
C(31)-H(31) 0.9500  
C(32)-H(32) 0.9500  
C(33)-H(33D) 0.9800  
C(33)-H(33E) 0.9800  
C(33)-H(33F) 0.9800  
C(34)-H(34A) 0.9800  
C(34)-H(34B) 0.9800  
C(34)-H(34C) 0.9800  
C(26A)-C(27A) 1.560(6)  
C(26A)-H(26A) 1.0000  
C(27A)-C(32A) 1.375(7)  
C(27A)-C(28A) 1.397(8)  
C(28A)-C(29A) 1.380(8)  
C(28A)-H(28A) 0.9500  
C(29A)-C(30A) 1.400(8)  
C(29A)-H(29A) 0.9500  
C(30A)-C(31A) 1.367(9)  
C(30A)-C(34A) 1.521(9)  
C(31A)-C(32A) 1.429(9)  
C(31A)-C(33A) 1.510(8)  
C(33A)-H(33A) 0.9800  
C(33A)-H(33B) 0.9800  
C(33A)-H(33C) 0.9800  
C(32A)-H(32A) 0.9500  
C(34A)-H(34D) 0.9800  
C(34A)-H(34E) 0.9800  
C(34A)-H(34F) 0.9800  
C(1)-F(2) 1.247(5)  
C(1)-F(3) 1.297(5)  
C(1)-F(1) 1.404(6)  
C(1A)-F(1A) 1.288(5)  
C(1A)-F(3A) 1.303(4)  
C(1A)-F(2A) 1.386(5)  
C(8)-N(1)-C(5) 123.55(15)  
C(8)-N(1)-H(1A) 118.2

C(5)-N(1)-H(1A) 118.2  
C(12)-N(2)-C(17) 111.21(13)  
C(12)-N(2)-C(9) 112.94(13)  
C(17)-N(2)-C(9) 115.30(15)  
C(3)-C(2)-C(7) 117.33(19)  
C(3)-C(2)-C(1A) 119.1(2)  
C(7)-C(2)-C(1A) 123.5(2)  
C(3)-C(2)-C(1) 119.1(2)  
C(7)-C(2)-C(1) 123.5(2)  
F(7)-C(3)-C(4) 118.1(2)  
F(7)-C(3)-C(2) 120.38(19)  
C(4)-C(3)-C(2) 121.47(19)  
F(6)-C(4)-C(3) 119.09(17)  
F(6)-C(4)-C(5) 119.11(17)  
C(3)-C(4)-C(5) 121.77(19)  
C(6)-C(5)-C(4) 117.07(17)  
C(6)-C(5)-N(1) 122.97(16)  
C(4)-C(5)-N(1) 119.96(17)  
F(5)-C(6)-C(5) 120.57(17)  
F(5)-C(6)-C(7) 118.29(17)  
C(5)-C(6)-C(7) 121.11(17)  
F(4)-C(7)-C(2) 121.63(19)  
F(4)-C(7)-C(6) 117.14(18)  
C(2)-C(7)-C(6) 121.20(19)  
O(1)-C(8)-N(1) 122.87(17)  
O(1)-C(8)-C(9) 123.90(17)  
N(1)-C(8)-C(9) 112.88(15)  
N(2)-C(9)-C(10) 114.97(14)  
N(2)-C(9)-C(11) 110.53(14)  
C(10)-C(9)-C(11) 108.76(16)  
N(2)-C(9)-C(8) 108.20(15)  
C(10)-C(9)-C(8) 110.17(15)  
C(11)-C(9)-C(8) 103.60(14)  
C(9)-C(10)-H(10A) 109.5  
C(9)-C(10)-H(10B) 109.5  
H(10A)-C(10)-H(10B) 109.5  
C(9)-C(10)-H(10C) 109.5  
H(10A)-C(10)-H(10C) 109.5  
H(10B)-C(10)-H(10C) 109.5  
C(9)-C(11)-H(11A) 109.5  
C(9)-C(11)-H(11B) 109.5  
H(11A)-C(11)-H(11B) 109.5  
C(9)-C(11)-H(11C) 109.5  
H(11A)-C(11)-H(11C) 109.5  
H(11B)-C(11)-H(11C) 109.5  
N(2)-C(12)-C(13) 111.62(14)

N(2)-C(12)-H(12A) 109.3  
C(13)-C(12)-H(12A) 109.3  
N(2)-C(12)-H(12B) 109.3  
C(13)-C(12)-H(12B) 109.3  
H(12A)-C(12)-H(12B) 108.0  
C(12)-C(13)-C(14) 114.35(14)  
C(12)-C(13)-C(26A) 109.49(16)  
C(14)-C(13)-C(26A) 99.70(14)  
C(12)-C(13)-C(26) 109.49(16)  
C(14)-C(13)-C(26) 99.70(14)  
C(12)-C(13)-H(13) 110.9  
C(14)-C(13)-H(13) 110.9  
C(26)-C(13)-H(13) 110.9  
C(18)-C(14)-C(13) 119.42(15)  
C(18)-C(14)-C(15) 116.22(14)  
C(13)-C(14)-C(15) 103.70(15)  
C(18)-C(14)-H(14) 105.4  
C(13)-C(14)-H(14) 105.4  
C(15)-C(14)-H(14) 105.4  
C(16)-C(15)-C(14) 105.29(14)  
C(16)-C(15)-H(15A) 110.7  
C(14)-C(15)-H(15A) 110.7  
C(16)-C(15)-H(15B) 110.7  
C(14)-C(15)-H(15B) 110.7  
H(15A)-C(15)-H(15B) 108.8  
C(17)-C(16)-C(26A) 110.88(15)  
C(17)-C(16)-C(26) 110.88(15)  
C(17)-C(16)-C(15) 110.31(14)  
C(26A)-C(16)-C(15) 102.15(15)  
C(26)-C(16)-C(15) 102.15(15)  
C(17)-C(16)-H(16) 111.1  
C(26)-C(16)-H(16) 111.1  
C(15)-C(16)-H(16) 111.1  
N(2)-C(17)-C(16) 109.58(15)  
N(2)-C(17)-H(17A) 109.8  
C(16)-C(17)-H(17A) 109.8  
N(2)-C(17)-H(17B) 109.8  
C(16)-C(17)-H(17B) 109.8  
H(17A)-C(17)-H(17B) 108.2  
C(19)-C(18)-C(23) 116.92(18)  
C(19)-C(18)-C(14) 122.30(17)  
C(23)-C(18)-C(14) 120.50(17)  
C(18)-C(19)-C(20) 121.64(19)  
C(18)-C(19)-H(19) 119.2  
C(20)-C(19)-H(19) 119.2  
C(21)-C(20)-C(19) 119.27(19)



C(21)-C(20)-C(24) 121.4(2)  
C(19)-C(20)-C(24) 119.3(2)  
C(22)-C(21)-C(20) 119.4(2)  
C(22)-C(21)-C(25) 120.3(2)  
C(20)-C(21)-C(25) 120.3(2)  
C(21)-C(22)-C(23) 121.3(2)  
C(21)-C(22)-H(22) 119.3  
C(23)-C(22)-H(22) 119.3  
C(22)-C(23)-C(18) 121.4(2)  
C(22)-C(23)-H(23) 119.3  
C(18)-C(23)-H(23) 119.3  
C(20)-C(24)-H(24A) 109.5  
C(20)-C(24)-H(24B) 109.5  
H(24A)-C(24)-H(24B) 109.5  
C(20)-C(24)-H(24C) 109.5  
H(24A)-C(24)-H(24C) 109.5  
H(24B)-C(24)-H(24C) 109.5  
C(21)-C(25)-H(25A) 109.5  
C(21)-C(25)-H(25B) 109.5  
H(25A)-C(25)-H(25B) 109.5  
C(21)-C(25)-H(25C) 109.5  
H(25A)-C(25)-H(25C) 109.5  
H(25B)-C(25)-H(25C) 109.5  
C(27)-C(26)-C(16) 122.4(2)  
C(27)-C(26)-C(13) 113.52(19)  
C(16)-C(26)-C(13) 98.80(14)  
C(27)-C(26)-H(26) 107.0  
C(16)-C(26)-H(26) 107.0  
C(13)-C(26)-H(26) 107.0  
C(32)-C(27)-C(28) 116.6(3)  
C(32)-C(27)-C(26) 125.5(3)  
C(28)-C(27)-C(26) 117.3(3)  
C(29)-C(28)-C(27) 122.8(3)  
C(29)-C(28)-H(28) 118.6  
C(27)-C(28)-H(28) 118.6  
C(30)-C(29)-C(28) 119.1(4)  
C(30)-C(29)-C(33) 121.6(4)  
C(28)-C(29)-C(33) 119.2(4)  
C(29)-C(30)-C(31) 118.4(3)  
C(29)-C(30)-C(34) 121.8(4)  
C(31)-C(30)-C(34) 119.8(4)  
C(32)-C(31)-C(30) 122.1(4)  
C(32)-C(31)-H(31) 118.9  
C(30)-C(31)-H(31) 118.9  
C(27)-C(32)-C(31) 120.9(4)  
C(27)-C(32)-H(32) 119.5

C(31)-C(32)-H(32) 119.5  
C(29)-C(33)-H(33D) 109.5  
C(29)-C(33)-H(33E) 109.5  
H(33D)-C(33)-H(33E) 109.5  
C(29)-C(33)-H(33F) 109.5  
H(33D)-C(33)-H(33F) 109.5  
H(33E)-C(33)-H(33F) 109.5  
C(30)-C(34)-H(34A) 109.5  
C(30)-C(34)-H(34B) 109.5  
H(34A)-C(34)-H(34B) 109.5  
C(30)-C(34)-H(34C) 109.5  
H(34A)-C(34)-H(34C) 109.5  
H(34B)-C(34)-H(34C) 109.5  
C(16)-C(26A)-C(13) 98.80(14)  
C(16)-C(26A)-C(27A) 110.9(3)  
C(13)-C(26A)-C(27A) 128.0(2)  
C(16)-C(26A)-H(26A) 105.7  
C(13)-C(26A)-H(26A) 105.7  
C(27A)-C(26A)-H(26A) 105.7  
C(32A)-C(27A)-C(28A) 118.0(5)  
C(32A)-C(27A)-C(26A) 117.7(5)  
C(28A)-C(27A)-C(26A) 124.2(4)  
C(29A)-C(28A)-C(27A) 119.6(5)  
C(29A)-C(28A)-H(28A) 120.2  
C(27A)-C(28A)-H(28A) 120.2  
C(28A)-C(29A)-C(30A) 122.6(6)  
C(28A)-C(29A)-H(29A) 118.7  
C(30A)-C(29A)-H(29A) 118.7  
C(31A)-C(30A)-C(29A) 118.6(5)  
C(31A)-C(30A)-C(34A) 119.9(6)  
C(29A)-C(30A)-C(34A) 121.5(6)  
C(30A)-C(31A)-C(32A) 118.7(5)  
C(30A)-C(31A)-C(33A) 123.2(6)  
C(32A)-C(31A)-C(33A) 118.1(6)  
C(31A)-C(33A)-H(33A) 109.5  
C(31A)-C(33A)-H(33B) 109.5  
H(33A)-C(33A)-H(33B) 109.5  
C(31A)-C(33A)-H(33C) 109.5  
H(33A)-C(33A)-H(33C) 109.5  
H(33B)-C(33A)-H(33C) 109.5  
C(27A)-C(32A)-C(31A) 122.5(6)  
C(27A)-C(32A)-H(32A) 118.8  
C(31A)-C(32A)-H(32A) 118.8  
C(30A)-C(34A)-H(34D) 109.5  
C(30A)-C(34A)-H(34E) 109.5  
H(34D)-C(34A)-H(34E) 109.5

C(30A)-C(34A)-H(34F) 109.5  
H(34D)-C(34A)-H(34F) 109.5  
H(34E)-C(34A)-H(34F) 109.5  
F(2)-C(1)-F(3) 111.7(4)  
F(2)-C(1)-F(1) 99.0(4)  
F(3)-C(1)-F(1) 105.3(4)  
F(2)-C(1)-C(2) 118.9(3)  
F(3)-C(1)-C(2) 112.4(3)  
F(1)-C(1)-C(2) 107.7(3)  
F(1A)-C(1A)-F(3A) 109.8(3)  
F(1A)-C(1A)-F(2A) 103.4(3)  
F(3A)-C(1A)-F(2A) 109.0(3)  
F(1A)-C(1A)-C(2) 112.9(3)  
F(3A)-C(1A)-C(2) 112.3(3)  
F(2A)-C(1A)-C(2) 109.0(3)

---

**Symmetry transformations used to generate equivalent atoms:**

**Anisotropic displacement parameters ( $\text{Å}^2 \times 10^3$ ) for analog of 11g.**

**The anisotropic displacement factor exponent takes the form:**

**$-2 \pi^2 [ h^2 a^{*2} U_{11} + \dots + 2 h k a^* b^* U_{12} ]$**

---

U11 U22 U33 U23 U13 U12

---

O(1) 21(1) 38(1) 38(1) -7(1) -5(1) -8(1)  
N(1) 19(1) 35(1) 34(1) -9(1) -3(1) -8(1)  
N(2) 20(1) 26(1) 34(1) -7(1) -3(1) -8(1)  
C(2) 33(1) 65(1) 36(1) -17(1) 1(1) -17(1)  
C(3) 42(1) 47(1) 32(1) -6(1) -5(1) -17(1)  
C(4) 32(1) 34(1) 35(1) -9(1) -7(1) -7(1)  
C(5) 22(1) 32(1) 33(1) -10(1) -4(1) -9(1)  
C(6) 25(1) 35(1) 36(1) -10(1) -5(1) -6(1)  
C(7) 23(1) 62(1) 42(1) -25(1) -2(1) -5(1)  
C(8) 23(1) 25(1) 30(1) -5(1) -3(1) -9(1)  
C(9) 22(1) 29(1) 32(1) -7(1) -3(1) -9(1)  
C(10) 29(1) 41(1) 32(1) -8(1) -4(1) -12(1)  
C(11) 29(1) 31(1) 38(1) -11(1) -2(1) -11(1)  
C(12) 22(1) 27(1) 40(1) -7(1) -5(1) -7(1)  
C(13) 22(1) 27(1) 40(1) -8(1) -4(1) -7(1)  
C(14) 20(1) 31(1) 36(1) -13(1) -2(1) -6(1)  
C(15) 21(1) 31(1) 32(1) -9(1) -3(1) -2(1)  
C(16) 21(1) 36(1) 33(1) -13(1) 0(1) -6(1)  
C(17) 23(1) 34(1) 33(1) -13(1) 1(1) -7(1)  
C(18) 21(1) 44(1) 42(1) -24(1) 0(1) -10(1)  
C(19) 24(1) 44(1) 57(1) -26(1) 1(1) -9(1)  
C(20) 22(1) 51(1) 68(1) -38(1) -2(1) -8(1)

C(21) 35(1) 56(1) 46(1) -22(1) 1(1) -19(1)  
 C(22) 35(1) 63(1) 41(1) -19(1) 0(1) -16(1)  
 C(23) 30(1) 53(1) 37(1) -17(1) -1(1) -14(1)  
 C(24) 34(1) 46(1) 69(1) -22(1) 5(1) -6(1)  
 C(25) 41(1) 72(1) 55(1) -30(1) 7(1) -16(1)  
 C(26) 22(1) 36(1) 34(1) -8(1) -1(1) -11(1)  
 C(27) 15(1) 36(2) 32(1) -11(1) 4(1) -9(1)  
 C(28) 29(2) 40(2) 35(2) -14(1) 5(1) -7(1)  
 C(29) 32(2) 60(2) 35(2) -19(1) 7(1) -17(2)  
 C(30) 35(2) 62(2) 32(2) -17(1) 4(1) -23(1)  
 C(31) 37(2) 49(2) 27(2) -5(1) -4(1) -18(1)  
 C(32) 25(2) 35(1) 32(2) -10(1) 0(1) -10(1)  
 C(33) 61(2) 100(3) 52(2) -43(2) 27(2) -20(2)  
 C(34) 50(2) 98(3) 35(2) -14(2) 6(2) -37(2)  
 C(26A) 22(1) 36(1) 34(1) -8(1) -1(1) -11(1)  
 C(27A) 11(2) 33(2) 35(2) -6(2) -5(2) -3(2)  
 C(28A) 29(2) 31(2) 39(2) -1(2) 2(2) 1(2)  
 C(29A) 33(3) 43(3) 42(3) -3(2) 2(2) 0(2)  
 C(30A) 38(3) 43(2) 36(2) -8(2) -7(2) -8(2)  
 C(31A) 30(3) 40(2) 45(3) -8(2) -6(2) -9(2)  
 C(32A) 24(2) 33(2) 42(2) -10(2) -7(2) -1(2)  
 C(34A) 52(3) 69(4) 41(3) -3(3) 2(2) -9(3)  
 C(1) 42(1) 107(2) 39(1) -21(1) 5(1) -21(1)  
 F(1) 81(2) 129(3) 84(3) -24(2) 32(2) -56(2)  
 F(2) 46(2) 189(5) 63(2) 4(3) 21(2) 5(2)  
 F(3) 85(2) 191(3) 52(2) -54(2) 20(2) -78(2)  
 C(1A) 42(1) 107(2) 39(1) -21(1) 5(1) -21(1)  
 F(1A) 60(2) 169(3) 56(2) -47(2) 22(1) -63(2)  
 F(2A) 45(2) 136(3) 54(2) -40(2) 23(1) -18(2)  
 F(3A) 64(2) 121(3) 28(1) -15(2) -4(1) 18(2)  
 F(4) 30(1) 84(1) 62(1) -39(1) -4(1) 10(1)  
 F(5) 34(1) 36(1) 45(1) -10(1) -8(1) 1(1)  
 F(6) 48(1) 35(1) 44(1) -10(1) -10(1) 4(1)  
 F(7) 74(1) 53(1) 33(1) 4(1) -5(1) -19(1)

**Hydrogen coordinates (  $\times 10^4$  ) and isotropic displacement parameters ( $\text{Å}^2 \times 10^3$ ) for analog of 11g.**

|        | x    | y    | z    | U(eq) |
|--------|------|------|------|-------|
| H(1A)  | 6982 | 1790 | 5635 | 36    |
| H(10A) | 6117 | 3326 | 2752 | 52    |
| H(10B) | 5417 | 2189 | 2727 | 52    |
| H(10C) | 7107 | 2429 | 2374 | 52    |
| H(11A) | 7461 | 407  | 3559 | 49    |

H(11B) 5836 308 4076 49  
H(11C) 7233 140 4731 49  
H(12A) 7336 3746 4223 37  
H(12B) 8162 3845 3175 37  
H(13) 9597 4636 4124 37  
H(14) 10792 3468 5480 34  
H(15A) 11581 1720 5593 34  
H(15B) 9951 1290 5606 34  
H(16) 11767 1698 4010 35  
H(17A) 9555 2005 3059 36  
H(17B) 9496 879 4043 36  
H(19) 7688 4535 5508 47  
H(22) 7879 1386 8455 54  
H(23) 9488 1435 7111 47  
H(24A) 4674 4565 6995 74  
H(24B) 5743 5397 6156 74  
H(24C) 5903 5220 7301 74  
H(25A) 6006 2151 9252 80  
H(25B) 4806 2969 8541 80  
H(25C) 6061 3522 8927 80  
H(26) 11864 3612 3962 38  
H(28) 12221 2732 2297 42  
H(31) 10483 6495 810 47  
H(32) 9986 5572 2492 37  
H(33D) 12511 3373 -129 101  
H(33E) 13344 2639 850 101  
H(33F) 13981 3829 118 101  
H(34A) 11676 5413 -943 93  
H(34B) 13071 5941 -675 93  
H(34C) 11492 6602 -733 93  
H(26A) 11849 3596 3987 38  
H(28A) 12472 2351 2464 43  
H(29A) 13176 3127 791 52  
H(33A) 11623 7064 80 83  
H(33B) 10212 6915 839 83  
H(33C) 10142 6600 -144 83  
H(32A) 10324 5362 2284 40  
H(34D) 11754 5564 -980 88  
H(34E) 13035 4578 -820 88  
H(34F) 13347 5775 -696 88

---

**Torsion angles [°] for analog of 11g.**

---

C(7)-C(2)-C(3)-F(7) -179.7(2)  
C(1A)-C(2)-C(3)-F(7) 1.0(3)

C(1)-C(2)-C(3)-F(7) 1.0(3)  
C(7)-C(2)-C(3)-C(4) -1.3(3)  
C(1A)-C(2)-C(3)-C(4) 179.4(2)  
C(1)-C(2)-C(3)-C(4) 179.4(2)  
F(7)-C(3)-C(4)-F(6) -0.1(3)  
C(2)-C(3)-C(4)-F(6) -178.6(2)  
F(7)-C(3)-C(4)-C(5) 177.96(18)  
C(2)-C(3)-C(4)-C(5) -0.5(3)  
F(6)-C(4)-C(5)-C(6) -179.77(17)  
C(3)-C(4)-C(5)-C(6) 2.1(3)  
F(6)-C(4)-C(5)-N(1) 0.4(3)  
C(3)-C(4)-C(5)-N(1) -177.69(19)  
C(8)-N(1)-C(5)-C(6) -56.8(3)  
C(8)-N(1)-C(5)-C(4) 123.0(2)  
C(4)-C(5)-C(6)-F(5) 175.81(17)  
N(1)-C(5)-C(6)-F(5) -4.4(3)  
C(4)-C(5)-C(6)-C(7) -2.1(3)  
N(1)-C(5)-C(6)-C(7) 177.75(18)  
C(3)-C(2)-C(7)-F(4) -176.7(2)  
C(1A)-C(2)-C(7)-F(4) 2.5(4)  
C(1)-C(2)-C(7)-F(4) 2.5(4)  
C(3)-C(2)-C(7)-C(6) 1.3(3)  
C(1A)-C(2)-C(7)-C(6) -179.4(2)  
C(1)-C(2)-C(7)-C(6) -179.4(2)  
F(5)-C(6)-C(7)-F(4) 0.6(3)  
C(5)-C(6)-C(7)-F(4) 178.52(18)  
F(5)-C(6)-C(7)-C(2) -177.55(19)  
C(5)-C(6)-C(7)-C(2) 0.4(3)  
C(5)-N(1)-C(8)-O(1) 8.9(3)  
C(5)-N(1)-C(8)-C(9) -164.53(16)  
C(12)-N(2)-C(9)-C(10) 50.4(2)  
C(17)-N(2)-C(9)-C(10) -78.99(19)  
C(12)-N(2)-C(9)-C(11) 174.00(15)  
C(17)-N(2)-C(9)-C(11) 44.60(19)  
C(12)-N(2)-C(9)-C(8) -73.20(18)  
C(17)-N(2)-C(9)-C(8) 157.40(14)  
O(1)-C(8)-C(9)-N(2) 154.52(16)  
N(1)-C(8)-C(9)-N(2) -32.17(18)  
O(1)-C(8)-C(9)-C(10) 28.1(2)  
N(1)-C(8)-C(9)-C(10) -158.63(15)  
O(1)-C(8)-C(9)-C(11) -88.1(2)  
N(1)-C(8)-C(9)-C(11) 85.18(17)  
C(17)-N(2)-C(12)-C(13) -52.6(2)  
C(9)-N(2)-C(12)-C(13) 175.95(15)  
N(2)-C(12)-C(13)-C(14) -48.4(2)  
N(2)-C(12)-C(13)-C(26A) 62.48(19)

N(2)-C(12)-C(13)-C(26) 62.48(19)  
C(12)-C(13)-C(14)-C(18) -52.9(2)  
C(26A)-C(13)-C(14)-C(18) -169.56(16)  
C(26)-C(13)-C(14)-C(18) -169.56(16)  
C(12)-C(13)-C(14)-C(15) 78.37(18)  
C(26A)-C(13)-C(14)-C(15) -38.30(16)  
C(26)-C(13)-C(14)-C(15) -38.30(16)  
C(18)-C(14)-C(15)-C(16) 141.77(16)  
C(13)-C(14)-C(15)-C(16) 8.64(17)  
C(14)-C(15)-C(16)-C(17) -93.12(17)  
C(14)-C(15)-C(16)-C(26A) 24.82(17)  
C(14)-C(15)-C(16)-C(26) 24.82(17)  
C(12)-N(2)-C(17)-C(16) 52.66(19)  
C(9)-N(2)-C(17)-C(16) -177.10(13)  
C(26A)-C(16)-C(17)-N(2) -65.01(19)  
C(26)-C(16)-C(17)-N(2) -65.01(19)  
C(15)-C(16)-C(17)-N(2) 47.42(19)  
C(13)-C(14)-C(18)-C(19) -31.1(3)  
C(15)-C(14)-C(18)-C(19) -156.62(18)  
C(13)-C(14)-C(18)-C(23) 155.10(18)  
C(15)-C(14)-C(18)-C(23) 29.6(3)  
C(23)-C(18)-C(19)-C(20) 0.6(3)  
C(14)-C(18)-C(19)-C(20) -173.42(18)  
C(18)-C(19)-C(20)-C(21) 1.0(3)  
C(18)-C(19)-C(20)-C(24) 178.3(2)  
C(19)-C(20)-C(21)-C(22) -2.0(3)  
C(24)-C(20)-C(21)-C(22) -179.2(2)  
C(19)-C(20)-C(21)-C(25) 176.5(2)  
C(24)-C(20)-C(21)-C(25) -0.7(3)  
C(20)-C(21)-C(22)-C(23) 1.5(3)  
C(25)-C(21)-C(22)-C(23) -177.1(2)  
C(21)-C(22)-C(23)-C(18) 0.2(3)  
C(19)-C(18)-C(23)-C(22) -1.2(3)  
C(14)-C(18)-C(23)-C(22) 172.93(19)  
C(17)-C(16)-C(26)-C(27) -56.2(3)  
C(15)-C(16)-C(26)-C(27) -173.8(2)  
C(17)-C(16)-C(26)-C(13) 68.96(18)  
C(15)-C(16)-C(26)-C(13) -48.57(16)  
C(12)-C(13)-C(26)-C(27) 64.7(2)  
C(14)-C(13)-C(26)-C(27) -175.0(2)  
C(12)-C(13)-C(26)-C(16) -66.48(17)  
C(14)-C(13)-C(26)-C(16) 53.80(16)  
C(16)-C(26)-C(27)-C(32) 150.6(3)  
C(13)-C(26)-C(27)-C(32) 32.3(4)  
C(16)-C(26)-C(27)-C(28) -38.2(4)  
C(13)-C(26)-C(27)-C(28) -156.5(3)

C(32)-C(27)-C(28)-C(29) 0.4(6)  
C(26)-C(27)-C(28)-C(29) -171.7(3)  
C(27)-C(28)-C(29)-C(30) 0.9(6)  
C(27)-C(28)-C(29)-C(33) 178.9(4)  
C(28)-C(29)-C(30)-C(31) -2.1(6)  
C(33)-C(29)-C(30)-C(31) 180.0(4)  
C(28)-C(29)-C(30)-C(34) 178.6(4)  
C(33)-C(29)-C(30)-C(34) 0.7(6)  
C(29)-C(30)-C(31)-C(32) 2.1(6)  
C(34)-C(30)-C(31)-C(32) -178.6(4)  
C(28)-C(27)-C(32)-C(31) -0.4(5)  
C(26)-C(27)-C(32)-C(31) 170.9(3)  
C(30)-C(31)-C(32)-C(27) -0.8(6)  
C(17)-C(16)-C(26A)-C(13) 68.96(18)  
C(15)-C(16)-C(26A)-C(13) -48.57(16)  
C(17)-C(16)-C(26A)-C(27A) -67.6(3)  
C(15)-C(16)-C(26A)-C(27A) 174.8(2)  
C(12)-C(13)-C(26A)-C(16) -66.48(17)  
C(14)-C(13)-C(26A)-C(16) 53.80(16)  
C(12)-C(13)-C(26A)-C(27A) 59.0(3)  
C(14)-C(13)-C(26A)-C(27A) 179.2(3)  
C(16)-C(26A)-C(27A)-C(32A) 153.4(4)  
C(13)-C(26A)-C(27A)-C(32A) 32.9(6)  
C(16)-C(26A)-C(27A)-C(28A) -31.2(6)  
C(13)-C(26A)-C(27A)-C(28A) -151.7(4)  
C(32A)-C(27A)-C(28A)-C(29A) 2.2(9)  
C(26A)-C(27A)-C(28A)-C(29A) -173.3(5)  
C(27A)-C(28A)-C(29A)-C(30A) -2.3(10)  
C(28A)-C(29A)-C(30A)-C(31A) 1.4(10)  
C(28A)-C(29A)-C(30A)-C(34A) 178.9(6)  
C(29A)-C(30A)-C(31A)-C(32A) -0.4(9)  
C(34A)-C(30A)-C(31A)-C(32A) -177.9(6)  
C(29A)-C(30A)-C(31A)-C(33A) 179.3(6)  
C(34A)-C(30A)-C(31A)-C(33A) 1.8(9)  
C(28A)-C(27A)-C(32A)-C(31A) -1.2(8)  
C(26A)-C(27A)-C(32A)-C(31A) 174.5(5)  
C(30A)-C(31A)-C(32A)-C(27A) 0.3(9)  
C(33A)-C(31A)-C(32A)-C(27A) -179.4(6)  
C(3)-C(2)-C(1)-F(2) -158.8(5)  
C(7)-C(2)-C(1)-F(2) 22.0(6)  
C(3)-C(2)-C(1)-F(3) 68.1(4)  
C(7)-C(2)-C(1)-F(3) -111.2(4)  
C(3)-C(2)-C(1)-F(1) -47.5(4)  
C(7)-C(2)-C(1)-F(1) 133.3(3)  
C(3)-C(2)-C(1A)-F(1A) -73.0(4)  
C(7)-C(2)-C(1A)-F(1A) 107.7(4)



C(3)-C(2)-C(1A)-F(3A) 51.7(4)  
C(7)-C(2)-C(1A)-F(3A) -127.5(4)  
C(3)-C(2)-C(1A)-F(2A) 172.6(3)  
C(7)-C(2)-C(1A)-F(2A) -6.6(4)

---

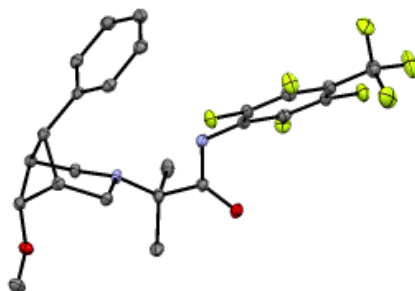

**Figure S6.** Structure determination of compound **11b**.

#### Structure Determination.

Colorless plates of **11b** were grown from a chloroform solution of the compound at 22 °C. A crystal of dimensions 0.26 x 0.19 x 0.16 mm was mounted on a Rigaku AFC10K Saturn 944+ CCD-based X-ray diffractometer equipped with a low temperature device and Micromax-007HF Cu-target micro-focus rotating anode ( $\lambda = 1.54187 \text{ \AA}$ ) operated at 0.6 kW power (40 kV, 15 mA). The X-ray intensities were measured at 85(1) K with the detector placed at a distance 42.00 mm from the crystal. A total of 2028 images were collected with an oscillation width of 1.0° in  $\omega$ . The exposure times were 1 sec. for the low angle images, 8 sec. for high angle. The integration of the data yielded a total of 35070 reflections to a maximum  $2\theta$  value of 136.48° of which 7988 were independent and 7301 were greater than  $2\sigma(I)$ . The final cell constants (Table S14) were based on the xyz centroids 21875 reflections above  $10\sigma(I)$ . Analysis of the data showed negligible decay during data collection; the data were processed with CrystalClear 2.0 and corrected for absorption. The structure was solved and refined with the Bruker SHELXTL (version 2014/6) software package, using the space group P1bar with  $Z = 4$  for the formula  $C_{24}H_{23}N_2O_2F_7$ . All non-hydrogen atoms were refined anisotropically with the hydrogen atoms placed in idealized and refined positions. Full matrix least-squares refinement based on  $F^2$  converged at  $R1 = 0.0361$  and  $wR2 = 0.0933$  [based on  $I > 2\sigma(I)$ ],  $R1 = 0.0385$  and  $wR2 = 0.0951$  for all data. Additional details are presented below. Acknowledgement is made for funding from NSF grant CHE-0840456 for X-ray instrumentation.

**Table S14.** Crystal data and structure refinement for **11b**.

|                                  |                                                                              |
|----------------------------------|------------------------------------------------------------------------------|
| Empirical formula                | C <sub>24</sub> H <sub>23</sub> F <sub>7</sub> N <sub>2</sub> O <sub>2</sub> |
| Formula weight                   | 504.44                                                                       |
| Temperature                      | 85(2) K                                                                      |
| Wavelength                       | 1.54178 Å                                                                    |
| Crystal system, space group      | Triclinic, P-1                                                               |
| Unit cell dimensions a =         | 13.1300(2) Å $\alpha = 77.984(6)^\circ$ .                                    |
| b =                              | 13.3882(2) Å $\beta = 75.211(5)^\circ$ .                                     |
| c =                              | 15.0424(11) Å $\gamma = 61.339(4)^\circ$ .                                   |
| Volume                           | 2231.9(2) Å <sup>3</sup>                                                     |
| Z, Calculated density            | 4, 1.501 Mg/m <sup>3</sup>                                                   |
| Absorption coefficient           | 1.185 mm <sup>-1</sup>                                                       |
| F(000)                           | 1040                                                                         |
| Crystal size                     | 0.260 x 0.190 x 0.160 mm                                                     |
| Theta range for data collection  | 3.054 to 68.243 °.                                                           |
| Limiting indices                 | -15 ≤ h ≤ 15, -16 ≤ k ≤ 16, -18 ≤ l ≤ 18                                     |
| Reflections collected / unique   | 35070 / 7988 [R(int) = 0.0461]                                               |
| Completeness to theta =          | 67.679 98.1 %                                                                |
| Absorption correction            | Semi-empirical from equivalents                                              |
| Max. and min. transmission       | 0.814 and 0.669                                                              |
| Refinement method                | Full-matrix least-squares on F <sup>2</sup>                                  |
| Data / restraints / parameters   | 7988 / 36 / 674                                                              |
| Goodness-of-fit on               | F <sup>2</sup> 1.066                                                         |
| Final R indices [I > 2σ(I)] R1 = | 0.0361, wR2 = 0.0933                                                         |
| R indices (all data) R1 =        | 0.0385, wR2 = 0.0951                                                         |
| Extinction coefficient           | 0.00140(13)                                                                  |
| Largest diff. peak and hole      | 0.448 and -0.261 e.Å <sup>-3</sup>                                           |

Atomic coordinates ( x 10<sup>4</sup>) and equivalent isotropic displacement parameters (Å<sup>2</sup> x 10<sup>3</sup>) for **11b**.

U(eq) is defined as one third of the trace of the orthogonalized Uij tensor.

|       | x         | y        | z        | U(eq) |
|-------|-----------|----------|----------|-------|
| F(1)  | 12273(1)  | 5846(1)  | 6220(1)  | 19(1) |
| F(2)  | 12021(1)  | 5079(1)  | 4847(1)  | 21(1) |
| F(3)  | 8501(1)   | 8496(1)  | 4530(1)  | 20(1) |
| F(4)  | 8746(1)   | 9228(1)  | 5944(1)  | 19(1) |
| F(5)  | 11018(1)  | 5446(1)  | 3523(1)  | 41(1) |
| F(6)  | 9878(1)   | 7160(1)  | 3114(1)  | 31(1) |
| F(7)  | 9167(1)   | 6151(1)  | 4090(1)  | 41(1) |
| F(5A) | 10904(10) | 6143(10) | 3141(7)  | 48(2) |
| F(6A) | 9130(11)  | 7077(9)  | 3429(8)  | 54(3) |
| F(7A) | 10014(9)  | 5370(8)  | 4135(6)  | 42(2) |
| F(8)  | 3706(1)   | 4953(1)  | 7715(1)  | 21(1) |
| F(9)  | 3220(1)   | 5986(1)  | 9207(1)  | 25(1) |
| F(10) | 4001(1)   | 2472(1)  | 11074(1) | 22(1) |
| F(11) | 4568(1)   | 1443(1)  | 9583(1)  | 20(1) |
| F(12) | 3929(1)   | 5448(1)  | 10916(1) | 33(1) |
| F(13) | 3287(1)   | 4315(1)  | 11806(1) | 41(1) |
| F(14) | 2130(1)   | 5794(1)  | 11058(1) | 38(1) |
| O(1)  | 8133(1)   | 10499(1) | 10012(1) | 17(1) |
| O(2)  | 10711(1)  | 9595(1)  | 6149(1)  | 18(1) |
| O(3)  | 4264(1)   | 1761(1)  | 4212(1)  | 17(1) |
| O(4)  | 2915(1)   | 2149(1)  | 8319(1)  | 20(1) |
| N(1)  | 9950(1)   | 8767(1)  | 8484(1)  | 14(1) |
| N(2)  | 10664(1)  | 7936(1)  | 6859(1)  | 15(1) |
| N(3)  | 4895(1)   | 1750(1)  | 6184(1)  | 13(1) |
| N(4)  | 4451(1)   | 2582(1)  | 7823(1)  | 16(1) |
| C(1)  | 7076(1)   | 11517(1) | 9910(1)  | 24(1) |

C(2) 7981(1) 9511(1) 10063(1) 17(1)  
C(3) 7882(1) 9190(1) 9168(1) 16(1)  
C(4) 8715(1) 9471(1) 8367(1) 15(1)  
C(5) 10147(1) 8495(1) 9446(1) 15(1)  
C(6) 9101(1) 8370(1) 10093(1) 16(1)  
C(7) 8510(1) 7929(1) 9591(1) 17(1)  
C(8) 9208(1) 6965(1) 8988(1) 17(1)  
C(9) 10230(1) 6016(1) 9212(1) 20(1)  
C(10) 10819(1) 5095(1) 8683(1) 25(1)  
C(11) 10399(1) 5107(1) 7921(1) 26(1)  
C(12) 9382(1) 6044(1) 7690(1) 25(1)  
C(13) 8792(1) 6964(1) 8222(1) 20(1)  
C(14) 10778(1) 9118(1) 7803(1) 14(1)  
C(15) 10566(1) 10342(1) 7829(1) 17(1)  
C(16) 12059(1) 8298(1) 7926(1) 18(1)  
C(17) 10693(1) 8948(1) 6846(1) 14(1)  
C(18) 10543(1) 7576(1) 6097(1) 14(1)  
C(19) 11344(1) 6516(1) 5799(1) 14(1)  
C(20) 11207(1) 6120(1) 5082(1) 15(1)  
C(21) 10269(1) 6780(1) 4619(1) 15(1)  
C(22) 9460(1) 7844(1) 4918(1) 15(1)  
C(23) 9590(1) 8232(1) 5642(1) 15(1)  
C(24) 10087(1) 6376(1) 3836(1) 19(1)  
C(25) 3249(1) 2498(1) 3811(1) 21(1)  
C(26) 4989(1) 2288(1) 4162(1) 15(1)  
C(27) 4614(1) 3192(1) 4830(1) 14(1)  
C(28) 4033(1) 2820(1) 5766(1) 14(1)  
C(29) 5776(1) 934(1) 5522(1) 14(1)  
C(30) 6086(1) 1570(1) 4611(1) 15(1)  
C(31) 5965(1) 2736(1) 4780(1) 15(1)  
C(32) 6446(1) 2816(1) 5554(1) 14(1)

C(33) 7513(1) 1935(1) 5767(1) 17(1)  
C(34) 7969(1) 1983(1) 6484(1) 20(1)  
C(35) 7380(1) 2924(1) 6990(1) 21(1)  
C(36) 6338(1) 3824(1) 6765(1) 20(1)  
C(37) 5866(1) 3769(1) 6054(1) 16(1)  
C(38) 4366(1) 1225(1) 7007(1) 15(1)  
C(39) 5339(1) 145(1) 7419(1) 21(1)  
C(40) 3441(1) 929(1) 6839(1) 21(1)  
C(41) 3809(1) 2039(1) 7764(1) 15(1)  
C(42) 4169(1) 3158(1) 8597(1) 15(1)  
C(43) 3817(1) 4322(1) 8535(1) 16(1)  
C(44) 3540(1) 4863(1) 9311(1) 17(1)  
C(45) 3571(1) 4280(1) 10193(1) 18(1)  
C(46) 3912(1) 3120(1) 10257(1) 17(1)  
C(47) 4210(1) 2572(1) 9478(1) 16(1)  
C(48) 3235(1) 4944(1) 11003(1) 23(1)

---

**Bond lengths [Å] and angles [°] for 11b.**

---

F(1)-C(19) 1.3421(13)  
F(2)-C(20) 1.3392(13)  
F(3)-C(22) 1.3413(14)  
F(4)-C(23) 1.3374(13)  
F(5)-C(24) 1.3256(15)  
F(6)-C(24) 1.3258(15)  
F(7)-C(24) 1.3259(16)  
F(5A)-C(24) 1.259(10)  
F(6A)-C(24) 1.363(10)  
F(7A)-C(24) 1.368(9)  
F(8)-C(43) 1.3409(14)

F(9)-C(44) 1.3392(14)  
F(10)-C(46) 1.3440(14)  
F(11)-C(47) 1.3380(14)  
F(12)-C(48) 1.3399(17)  
F(13)-C(48) 1.3174(16)  
F(14)-C(48) 1.3419(16)  
O(1)-C(2) 1.4146(15)  
O(1)-C(1) 1.4195(15)  
O(2)-C(17) 1.2152(15)  
O(3)-C(26) 1.4123(15)  
O(3)-C(25) 1.4202(15)  
O(4)-C(41) 1.2170(14)  
N(1)-C(4) 1.4699(15)  
N(1)-C(5) 1.4740(15)  
N(1)-C(14) 1.4753(14)  
N(2)-C(17) 1.3686(16)  
N(2)-C(18) 1.4030(16)  
N(2)-H(2N) 0.808(16)  
N(3)-C(28) 1.4709(15)  
N(3)-C(38) 1.4749(15)  
N(3)-C(29) 1.4758(14)  
N(4)-C(41) 1.3780(16)  
N(4)-C(42) 1.4033(16)  
N(4)-H(4N) 0.859(16)  
C(1)-H(1A) 0.9800  
C(1)-H(1B) 0.9800  
C(1)-H(1C) 0.9800  
C(2)-C(6) 1.5324(17)  
C(2)-C(3) 1.5475(17)  
C(2)-H(2) 1.0000  
C(3)-C(4) 1.5241(16)

C(3)-C(7) 1.5557(17)  
C(3)-H(3) 1.0000  
C(4)-H(4A) 0.9900  
C(4)-H(4B) 0.9900  
C(5)-C(6) 1.5259(16)  
C(5)-H(5A) 0.9900  
C(5)-H(5B) 0.9900  
C(6)-C(7) 1.5633(17)  
C(6)-H(6) 1.0000  
C(7)-C(8) 1.5034(17)  
C(7)-H(7) 1.0000  
C(8)-C(9) 1.3951(18)  
C(8)-C(13) 1.3958(19)  
C(9)-C(10) 1.3904(19)  
C(9)-H(9) 0.9500  
C(10)-C(11) 1.388(2)  
C(10)-H(10) 0.9500  
C(11)-C(12) 1.388(2)  
C(11)-H(11) 0.9500  
C(12)-C(13) 1.3912(18)  
C(12)-H(12) 0.9500  
C(13)-H(13) 0.9500  
C(14)-C(15) 1.5310(17)  
C(14)-C(16) 1.5400(16)  
C(14)-C(17) 1.5438(16)  
C(15)-H(15A) 0.9800  
C(15)-H(15B) 0.9800  
C(15)-H(15C) 0.9800  
C(16)-H(16A) 0.9800  
C(16)-H(16B) 0.9800  
C(16)-H(16C) 0.9800

C(18)-C(19) 1.3837(17)  
C(18)-C(23) 1.3920(17)  
C(19)-C(20) 1.3793(18)  
C(20)-C(21) 1.3865(17)  
C(21)-C(22) 1.3890(17)  
C(21)-C(24) 1.5075(17)  
C(22)-C(23) 1.3787(18)  
C(25)-H(25A) 0.9800  
C(25)-H(25B) 0.9800  
C(25)-H(25C) 0.9800  
C(26)-C(30) 1.5344(16)  
C(26)-C(27) 1.5491(17)  
C(26)-H(26) 1.0000  
C(27)-C(28) 1.5276(16)  
C(27)-C(31) 1.5610(16)  
C(27)-H(27) 1.0000  
C(28)-H(28A) 0.9900  
C(28)-H(28B) 0.9900  
C(29)-C(30) 1.5270(16)  
C(29)-H(29A) 0.9900  
C(29)-H(29B) 0.9900  
C(30)-C(31) 1.5587(17)  
C(30)-H(30) 1.0000  
C(31)-C(32) 1.5028(17)  
C(31)-H(31) 1.0000  
C(32)-C(33) 1.3937(17)  
C(32)-C(37) 1.3959(17)  
C(33)-C(34) 1.3861(19)  
C(33)-H(33) 0.9500  
C(34)-C(35) 1.3898(19)  
C(34)-H(34) 0.9500



C(35)-C(36) 1.3870(18)  
C(35)-H(35) 0.9500  
C(36)-C(37) 1.3958(19)  
C(36)-H(36) 0.9500  
C(37)-H(37) 0.9500  
C(38)-C(41) 1.5319(16)  
C(38)-C(40) 1.5354(17)  
C(38)-C(39) 1.5374(17)  
C(39)-H(39A) 0.9800  
C(39)-H(39B) 0.9800  
C(39)-H(39C) 0.9800  
C(40)-H(40A) 0.9800  
C(40)-H(40B) 0.9800  
C(40)-H(40C) 0.9800  
C(42)-C(43) 1.3859(17)  
C(42)-C(47) 1.3916(17)  
C(43)-C(44) 1.3786(18)  
C(44)-C(45) 1.3926(18)  
C(45)-C(46) 1.3835(18)  
C(45)-C(48) 1.5063(18)  
C(46)-C(47) 1.3824(18)  
C(2)-O(1)-C(1) 111.70(10)  
C(26)-O(3)-C(25) 112.02(9)  
C(4)-N(1)-C(5) 115.50(9)  
C(4)-N(1)-C(14) 113.26(9)  
C(5)-N(1)-C(14) 115.93(9)  
C(17)-N(2)-C(18) 124.18(10)  
C(17)-N(2)-H(2N) 115.9(12)  
C(18)-N(2)-H(2N) 118.7(12)  
C(28)-N(3)-C(38) 113.96(9)  
C(28)-N(3)-C(29) 114.82(9)

C(38)-N(3)-C(29) 114.10(9)  
C(41)-N(4)-C(42) 120.03(10)  
C(41)-N(4)-H(4N) 118.1(11)  
C(42)-N(4)-H(4N) 121.6(11)  
O(1)-C(1)-H(1A) 109.5  
O(1)-C(1)-H(1B) 109.5  
H(1A)-C(1)-H(1B) 109.5  
O(1)-C(1)-H(1C) 109.5  
H(1A)-C(1)-H(1C) 109.5  
H(1B)-C(1)-H(1C) 109.5  
O(1)-C(2)-C(6) 115.49(10)  
O(1)-C(2)-C(3) 118.51(10)  
C(6)-C(2)-C(3) 87.27(9)  
O(1)-C(2)-H(2) 111.2  
C(6)-C(2)-H(2) 111.2  
C(3)-C(2)-H(2) 111.2  
C(4)-C(3)-C(2) 108.24(10)  
C(4)-C(3)-C(7) 110.72(9)  
C(2)-C(3)-C(7) 85.43(9)  
C(4)-C(3)-H(3) 116.1  
C(2)-C(3)-H(3) 116.1  
C(7)-C(3)-H(3) 116.1  
N(1)-C(4)-C(3) 111.03(9)  
N(1)-C(4)-H(4A) 109.4  
C(3)-C(4)-H(4A) 109.4  
N(1)-C(4)-H(4B) 109.4  
C(3)-C(4)-H(4B) 109.4  
H(4A)-C(4)-H(4B) 108.0  
N(1)-C(5)-C(6) 109.87(10)  
N(1)-C(5)-H(5A) 109.7  
C(6)-C(5)-H(5A) 109.7

N(1)-C(5)-H(5B) 109.7  
C(6)-C(5)-H(5B) 109.7  
H(5A)-C(5)-H(5B) 108.2  
C(5)-C(6)-C(2) 109.87(10)  
C(5)-C(6)-C(7) 111.13(9)  
C(2)-C(6)-C(7) 85.68(9)  
C(5)-C(6)-H(6) 115.5  
C(2)-C(6)-H(6) 115.5  
C(7)-C(6)-H(6) 115.5  
C(8)-C(7)-C(3) 121.18(10)  
C(8)-C(7)-C(6) 122.84(10)  
C(3)-C(7)-C(6) 85.91(9)  
C(8)-C(7)-H(7) 108.3  
C(3)-C(7)-H(7) 108.3  
C(6)-C(7)-H(7) 108.3  
C(9)-C(8)-C(13) 118.39(11)  
C(9)-C(8)-C(7) 121.36(11)  
C(13)-C(8)-C(7) 120.09(11)  
C(10)-C(9)-C(8) 120.64(13)  
C(10)-C(9)-H(9) 119.7  
C(8)-C(9)-H(9) 119.7  
C(11)-C(10)-C(9) 120.41(13)  
C(11)-C(10)-H(10) 119.8  
C(9)-C(10)-H(10) 119.8  
C(12)-C(11)-C(10) 119.57(12)  
C(12)-C(11)-H(11) 120.2  
C(10)-C(11)-H(11) 120.2  
C(11)-C(12)-C(13) 119.98(13)  
C(11)-C(12)-H(12) 120.0  
C(13)-C(12)-H(12) 120.0  
C(12)-C(13)-C(8) 121.01(12)

C(12)-C(13)-H(13) 119.5  
C(8)-C(13)-H(13) 119.5  
N(1)-C(14)-C(15) 115.07(9)  
N(1)-C(14)-C(16) 110.44(9)  
C(15)-C(14)-C(16) 108.16(10)  
N(1)-C(14)-C(17) 106.31(9)  
C(15)-C(14)-C(17) 111.01(9)  
C(16)-C(14)-C(17) 105.44(9)  
C(14)-C(15)-H(15A) 109.5  
C(14)-C(15)-H(15B) 109.5  
H(15A)-C(15)-H(15B) 109.5  
C(14)-C(15)-H(15C) 109.5  
H(15A)-C(15)-H(15C) 109.5  
H(15B)-C(15)-H(15C) 109.5  
C(14)-C(16)-H(16A) 109.5  
C(14)-C(16)-H(16B) 109.5  
H(16A)-C(16)-H(16B) 109.5  
C(14)-C(16)-H(16C) 109.5  
H(16A)-C(16)-H(16C) 109.5  
H(16B)-C(16)-H(16C) 109.5  
O(2)-C(17)-N(2) 123.47(11)  
O(2)-C(17)-C(14) 124.78(11)  
N(2)-C(17)-C(14) 111.64(10)  
C(19)-C(18)-C(23) 117.23(11)  
C(19)-C(18)-N(2) 120.68(11)  
C(23)-C(18)-N(2) 122.01(10)  
F(1)-C(19)-C(20) 118.83(10)  
F(1)-C(19)-C(18) 119.55(11)  
C(20)-C(19)-C(18) 121.62(11)  
F(2)-C(20)-C(19) 117.43(10)  
F(2)-C(20)-C(21) 121.36(11)

C(19)-C(20)-C(21) 121.21(11)  
C(20)-C(21)-C(22) 117.33(11)  
C(20)-C(21)-C(24) 122.75(11)  
C(22)-C(21)-C(24) 119.90(11)  
F(3)-C(22)-C(23) 118.44(10)  
F(3)-C(22)-C(21) 120.10(11)  
C(23)-C(22)-C(21) 121.40(11)  
F(4)-C(23)-C(22) 119.00(10)  
F(4)-C(23)-C(18) 119.67(11)  
C(22)-C(23)-C(18) 121.20(11)  
F(5)-C(24)-F(6) 105.81(11)  
F(5)-C(24)-F(7) 107.99(11)  
F(6)-C(24)-F(7) 106.84(11)  
F(5A)-C(24)-F(6A) 101.0(8)  
F(5A)-C(24)-F(7A) 104.1(7)  
F(6A)-C(24)-F(7A) 106.2(7)  
F(5A)-C(24)-C(21) 116.2(5)  
F(5)-C(24)-C(21) 113.02(10)  
F(6)-C(24)-C(21) 111.73(10)  
F(7)-C(24)-C(21) 111.10(10)  
F(6A)-C(24)-C(21) 118.6(4)  
F(7A)-C(24)-C(21) 109.3(4)  
O(3)-C(25)-H(25A) 109.5  
O(3)-C(25)-H(25B) 109.5  
H(25A)-C(25)-H(25B) 109.5  
O(3)-C(25)-H(25C) 109.5  
H(25A)-C(25)-H(25C) 109.5  
H(25B)-C(25)-H(25C) 109.5  
O(3)-C(26)-C(30) 115.76(9)  
O(3)-C(26)-C(27) 119.47(9)  
C(30)-C(26)-C(27) 87.00(9)

O(3)-C(26)-H(26) 110.9  
C(30)-C(26)-H(26) 110.9  
C(27)-C(26)-H(26) 110.9  
C(28)-C(27)-C(26) 108.28(9)  
C(28)-C(27)-C(31) 111.53(9)  
C(26)-C(27)-C(31) 85.32(8)  
C(28)-C(27)-H(27) 115.9  
C(26)-C(27)-H(27) 115.9  
C(31)-C(27)-H(27) 115.9  
N(3)-C(28)-C(27) 110.54(9)  
N(3)-C(28)-H(28A) 109.5  
C(27)-C(28)-H(28A) 109.5  
N(3)-C(28)-H(28B) 109.5  
C(27)-C(28)-H(28B) 109.5  
H(28A)-C(28)-H(28B) 108.1  
N(3)-C(29)-C(30) 110.57(9)  
N(3)-C(29)-H(29A) 109.5  
C(30)-C(29)-H(29A) 109.5  
N(3)-C(29)-H(29B) 109.5  
C(30)-C(29)-H(29B) 109.5  
H(29A)-C(29)-H(29B) 108.1  
C(29)-C(30)-C(26) 109.83(9)  
C(29)-C(30)-C(31) 110.66(9)  
C(26)-C(30)-C(31) 85.90(9)  
C(29)-C(30)-H(30) 115.6  
C(26)-C(30)-H(30) 115.6  
C(31)-C(30)-H(30) 115.6  
C(32)-C(31)-C(30) 120.90(10)  
C(32)-C(31)-C(27) 121.83(10)  
C(30)-C(31)-C(27) 85.74(9)  
C(32)-C(31)-H(31) 108.7

C(30)-C(31)-H(31) 108.7  
C(27)-C(31)-H(31) 108.7  
C(33)-C(32)-C(37) 118.70(11)  
C(33)-C(32)-C(31) 119.64(10)  
C(37)-C(32)-C(31) 121.63(10)  
C(34)-C(33)-C(32) 120.77(11)  
C(34)-C(33)-H(33) 119.6  
C(32)-C(33)-H(33) 119.6  
C(33)-C(34)-C(35) 120.36(11)  
C(33)-C(34)-H(34) 119.8  
C(35)-C(34)-H(34) 119.8  
C(36)-C(35)-C(34) 119.44(12)  
C(36)-C(35)-H(35) 120.3  
C(34)-C(35)-H(35) 120.3  
C(35)-C(36)-C(37) 120.27(12)  
C(35)-C(36)-H(36) 119.9  
C(37)-C(36)-H(36) 119.9  
C(36)-C(37)-C(32) 120.41(11)  
C(36)-C(37)-H(37) 119.8  
C(32)-C(37)-H(37) 119.8  
N(3)-C(38)-C(41) 108.44(9)  
N(3)-C(38)-C(40) 114.73(10)  
C(41)-C(38)-C(40) 109.48(9)  
N(3)-C(38)-C(39) 110.06(9)  
C(41)-C(38)-C(39) 104.20(10)  
C(40)-C(38)-C(39) 109.40(10)  
C(38)-C(39)-H(39A) 109.5  
C(38)-C(39)-H(39B) 109.5  
H(39A)-C(39)-H(39B) 109.5  
C(38)-C(39)-H(39C) 109.5  
H(39A)-C(39)-H(39C) 109.5

H(39B)-C(39)-H(39C) 109.5  
C(38)-C(40)-H(40A) 109.5  
C(38)-C(40)-H(40B) 109.5  
H(40A)-C(40)-H(40B) 109.5  
C(38)-C(40)-H(40C) 109.5  
H(40A)-C(40)-H(40C) 109.5  
H(40B)-C(40)-H(40C) 109.5  
O(4)-C(41)-N(4) 121.46(11)  
O(4)-C(41)-C(38) 123.58(11)  
N(4)-C(41)-C(38) 114.76(10)  
C(43)-C(42)-C(47) 116.79(11)  
C(43)-C(42)-N(4) 122.69(11)  
C(47)-C(42)-N(4) 120.50(11)  
F(8)-C(43)-C(44) 118.54(11)  
F(8)-C(43)-C(42) 120.22(11)  
C(44)-C(43)-C(42) 121.22(11)  
F(9)-C(44)-C(43) 118.56(11)  
F(9)-C(44)-C(45) 119.40(11)  
C(43)-C(44)-C(45) 122.03(11)  
C(46)-C(45)-C(44) 116.78(11)  
C(46)-C(45)-C(48) 124.82(11)  
C(44)-C(45)-C(48) 118.41(11)  
F(10)-C(46)-C(47) 117.21(11)  
F(10)-C(46)-C(45) 121.53(11)  
C(47)-C(46)-C(45) 121.24(11)  
F(11)-C(47)-C(46) 118.38(11)  
F(11)-C(47)-C(42) 119.68(11)  
C(46)-C(47)-C(42) 121.93(11)  
F(13)-C(48)-F(12) 107.77(11)  
F(13)-C(48)-F(14) 106.73(11)  
F(12)-C(48)-F(14) 105.79(11)



F(13)-C(48)-C(45) 113.59(11)

F(12)-C(48)-C(45) 111.17(10)

F(14)-C(48)-C(45) 111.38(11)

---

**Symmetry transformations used to generate equivalent atoms:**

Anisotropic displacement parameters ( $\text{Å}^2 \times 10^3$ ) for **11b**.

The anisotropic displacement factor exponent takes the form:

$$-2 \pi^2 [ h^2 a^{*2} U_{11} + \dots + 2 h k a^* b^* U_{12} ]$$

---

U11 U22 U33 U23 U13 U12

---

F(1) 15(1) 17(1) 23(1) -1(1) -7(1) -4(1)

F(2) 18(1) 13(1) 27(1) -8(1) -1(1) -4(1)

F(3) 17(1) 19(1) 23(1) -1(1) -9(1) -6(1)

F(4) 16(1) 15(1) 22(1) -7(1) -2(1) -2(1)

F(5) 38(1) 31(1) 47(1) -27(1) -20(1) 4(1)

F(6) 54(1) 30(1) 18(1) 1(1) -13(1) -24(1)

F(7) 52(1) 75(1) 28(1) -11(1) -1(1) -55(1)

F(5A) 55(4) 56(5) 41(4) -28(4) 13(3) -33(3)

F(6A) 59(4) 37(4) 67(5) -20(4) -40(4) -4(3)

F(7A) 81(5) 35(3) 39(4) 1(3) -27(4) -42(3)

F(8) 28(1) 19(1) 14(1) 1(1) -5(1) -10(1)

F(9) 37(1) 13(1) 22(1) -2(1) -6(1) -9(1)

F(10) 30(1) 24(1) 14(1) 2(1) -4(1) -13(1)

F(11) 25(1) 14(1) 21(1) -1(1) -4(1) -9(1)

F(12) 42(1) 41(1) 30(1) -14(1) -2(1) -27(1)

F(13) 75(1) 36(1) 16(1) -3(1) -6(1) -29(1)

F(14) 30(1) 40(1) 36(1) -23(1) 0(1) -6(1)

O(1) 17(1) 15(1) 21(1) -5(1) -4(1) -7(1)

O(2) 21(1) 19(1) 13(1) 0(1) -2(1) -11(1)

O(3) 18(1) 17(1) 18(1) -2(1) -4(1) -9(1)  
O(4) 20(1) 28(1) 16(1) -5(1) 3(1) -14(1)  
N(1) 13(1) 18(1) 11(1) -1(1) -1(1) -9(1)  
N(2) 20(1) 17(1) 11(1) -1(1) -2(1) -10(1)  
N(3) 14(1) 12(1) 12(1) -1(1) 1(1) -6(1)  
N(4) 18(1) 20(1) 14(1) -6(1) 3(1) -12(1)  
C(1) 21(1) 22(1) 27(1) -7(1) -7(1) -6(1)  
C(2) 17(1) 21(1) 15(1) -4(1) 1(1) -12(1)  
C(3) 14(1) 20(1) 16(1) -5(1) 0(1) -9(1)  
C(4) 14(1) 18(1) 14(1) -2(1) -3(1) -7(1)  
C(5) 16(1) 18(1) 12(1) 0(1) -3(1) -9(1)  
C(6) 19(1) 18(1) 12(1) -2(1) -1(1) -10(1)  
C(7) 18(1) 21(1) 14(1) -4(1) 2(1) -13(1)  
C(8) 21(1) 20(1) 16(1) -4(1) 3(1) -16(1)  
C(9) 22(1) 21(1) 20(1) -3(1) -1(1) -13(1)  
C(10) 22(1) 22(1) 30(1) -6(1) 3(1) -12(1)  
C(11) 30(1) 27(1) 28(1) -13(1) 6(1) -20(1)  
C(12) 32(1) 30(1) 22(1) -7(1) -1(1) -22(1)  
C(13) 23(1) 22(1) 21(1) -4(1) -1(1) -14(1)  
C(14) 15(1) 16(1) 12(1) -1(1) -1(1) -8(1)  
C(15) 21(1) 19(1) 16(1) -2(1) -4(1) -12(1)  
C(16) 15(1) 23(1) 16(1) -1(1) -2(1) -9(1)  
C(17) 10(1) 16(1) 15(1) -4(1) 0(1) -6(1)  
C(18) 16(1) 15(1) 13(1) -1(1) -1(1) -9(1)  
C(19) 12(1) 15(1) 16(1) 1(1) -3(1) -6(1)  
C(20) 14(1) 11(1) 18(1) -4(1) 2(1) -6(1)  
C(21) 17(1) 17(1) 16(1) -3(1) -1(1) -11(1)  
C(22) 13(1) 15(1) 18(1) 0(1) -3(1) -7(1)  
C(23) 14(1) 13(1) 17(1) -4(1) 1(1) -6(1)  
C(24) 21(1) 18(1) 21(1) -3(1) -4(1) -11(1)  
C(25) 20(1) 20(1) 24(1) -4(1) -8(1) -7(1)

C(26) 17(1) 17(1) 13(1) -1(1) -1(1) -10(1)  
C(27) 15(1) 13(1) 15(1) 0(1) -3(1) -7(1)  
C(28) 13(1) 13(1) 15(1) -2(1) -1(1) -5(1)  
C(29) 15(1) 13(1) 13(1) -3(1) -1(1) -6(1)  
C(30) 15(1) 16(1) 13(1) -3(1) 0(1) -7(1)  
C(31) 16(1) 15(1) 13(1) -1(1) 0(1) -9(1)  
C(32) 15(1) 15(1) 15(1) 0(1) 0(1) -11(1)  
C(33) 17(1) 16(1) 16(1) -1(1) 0(1) -10(1)  
C(34) 18(1) 22(1) 20(1) 2(1) -4(1) -11(1)  
C(35) 23(1) 28(1) 17(1) -1(1) -3(1) -17(1)  
C(36) 21(1) 21(1) 21(1) -6(1) 2(1) -13(1)  
C(37) 15(1) 15(1) 19(1) -1(1) -1(1) -8(1)  
C(38) 20(1) 16(1) 12(1) -2(1) 0(1) -11(1)  
C(39) 28(1) 18(1) 16(1) 0(1) -1(1) -10(1)  
C(40) 27(1) 28(1) 17(1) -5(1) 2(1) -21(1)  
C(41) 17(1) 16(1) 12(1) 0(1) -2(1) -9(1)  
C(42) 14(1) 19(1) 15(1) -4(1) -1(1) -9(1)  
C(43) 16(1) 18(1) 13(1) 1(1) -3(1) -8(1)  
C(44) 18(1) 14(1) 20(1) -2(1) -4(1) -7(1)  
C(45) 18(1) 20(1) 16(1) -4(1) -3(1) -9(1)  
C(46) 17(1) 20(1) 13(1) 2(1) -3(1) -10(1)  
C(47) 15(1) 14(1) 20(1) -2(1) -3(1) -7(1)  
C(48) 29(1) 23(1) 19(1) -4(1) -3(1) -13(1)

---

**Hydrogen coordinates (  $\times 10^4$ ) and isotropic displacement parameters ( $\text{\AA}^2 \times 10^3$ ) for 11b.**

---

| x     | y         | z        | U(eq)          |
|-------|-----------|----------|----------------|
| H(2N) | 10579(13) | 7602(13) | 7364(11) 21(4) |

---

H(4N) 4973(14) 2613(13) 7354(11) 21(4)  
H(1A) 6829 11540 9340 36  
H(1B) 7213 12183 9878 36  
H(1C) 6455 11531 10440 36  
H(2) 7331 9505 10581 20  
H(3) 7063 9459 9065 19  
H(4A) 8615 9332 7780 18  
H(4B) 8512 10290 8330 18  
H(5A) 10243 9112 9624 18  
H(5B) 10879 7773 9499 18  
H(6) 9244 7982 10724 19  
H(7) 7911 7752 10062 20  
H(9) 10527 6000 9731 24  
H(10) 11514 4454 8844 30  
H(11) 10805 4477 7559 32  
H(12) 9089 6057 7170 30  
H(13) 8095 7602 8061 24  
H(15A) 9761 10880 7732 26  
H(15B) 11133 10511 7339 26  
H(15C) 10667 10417 8431 26  
H(16A) 12192 8417 8499 27  
H(16B) 12603 8450 7401 27  
H(16C) 12197 7506 7957 27  
H(25A) 2777 3183 4142 31  
H(25B) 2775 2099 3855 31  
H(25C) 3493 2721 3160 31  
H(26) 5208 2578 3510 18  
H(27) 4179 4008 4584 17  
H(28A) 3708 3428 6183 17  
H(28B) 3372 2707 5684 17  
H(29A) 5456 446 5406 17

H(29B) 6498 431 5787 17  
H(30) 6823 1101 4191 18  
H(31) 6288 3076 4190 18  
H(33) 7932 1295 5417 20  
H(34) 8689 1369 6629 24  
H(35) 7688 2951 7487 25  
H(36) 5943 4480 7096 24  
H(37) 5146 4383 5909 20  
H(39A) 5635 -479 7033 32  
H(39B) 5014 -79 8046 32  
H(39C) 5987 303 7440 32  
H(40A) 2746 1636 6698 32  
H(40B) 3210 498 7395 32  
H(40C) 3776 464 6318 32

---

**Torsion angles [deg] for 11b.**

---

C(1)-O(1)-C(2)-C(6) 175.10(10)  
C(1)-O(1)-C(2)-C(3) 73.62(13)  
O(1)-C(2)-C(3)-C(4) 36.95(13)  
C(6)-C(2)-C(3)-C(4) -80.72(10)  
O(1)-C(2)-C(3)-C(7) 147.28(10)  
C(6)-C(2)-C(3)-C(7) 29.60(8)  
C(5)-N(1)-C(4)-C(3) -34.43(14)  
C(14)-N(1)-C(4)-C(3) -171.51(9)  
C(2)-C(3)-C(4)-N(1) 63.78(12)  
C(7)-C(3)-C(4)-N(1) -28.22(14)  
C(4)-N(1)-C(5)-C(6) 33.34(13)  
C(14)-N(1)-C(5)-C(6) 169.26(9)  
N(1)-C(5)-C(6)-C(2) -63.24(12)

N(1)-C(5)-C(6)-C(7) 29.84(13)  
O(1)-C(2)-C(6)-C(5) -38.96(14)  
C(3)-C(2)-C(6)-C(5) 81.49(10)  
O(1)-C(2)-C(6)-C(7) -149.88(10)  
C(3)-C(2)-C(6)-C(7) -29.43(8)  
C(4)-C(3)-C(7)-C(8) -47.53(15)  
C(2)-C(3)-C(7)-C(8) -155.32(11)  
C(4)-C(3)-C(7)-C(6) 78.78(10)  
C(2)-C(3)-C(7)-C(6) -29.01(8)  
C(5)-C(6)-C(7)-C(8) 44.52(15)  
C(2)-C(6)-C(7)-C(8) 154.18(11)  
C(5)-C(6)-C(7)-C(3) -80.34(10)  
C(2)-C(6)-C(7)-C(3) 29.31(8)  
C(3)-C(7)-C(8)-C(9) 144.67(12)  
C(6)-C(7)-C(8)-C(9) 37.74(17)  
C(3)-C(7)-C(8)-C(13) -40.09(16)  
C(6)-C(7)-C(8)-C(13) -147.03(12)  
C(13)-C(8)-C(9)-C(10) 0.10(18)  
C(7)-C(8)-C(9)-C(10) 175.41(11)  
C(8)-C(9)-C(10)-C(11) 0.15(19)  
C(9)-C(10)-C(11)-C(12) -0.2(2)  
C(10)-C(11)-C(12)-C(13) 0.1(2)  
C(11)-C(12)-C(13)-C(8) 0.18(19)  
C(9)-C(8)-C(13)-C(12) -0.26(18)  
C(7)-C(8)-C(13)-C(12) -175.64(11)  
C(4)-N(1)-C(14)-C(15) 60.96(13)  
C(5)-N(1)-C(14)-C(15) -75.94(12)  
C(4)-N(1)-C(14)-C(16) -176.26(10)  
C(5)-N(1)-C(14)-C(16) 46.85(13)  
C(4)-N(1)-C(14)-C(17) -62.37(12)  
C(5)-N(1)-C(14)-C(17) 160.74(9)

C(18)-N(2)-C(17)-O(2) -6.13(18)  
C(18)-N(2)-C(17)-C(14) 177.45(10)  
N(1)-C(14)-C(17)-O(2) 140.62(11)  
C(15)-C(14)-C(17)-O(2) 14.80(15)  
C(16)-C(14)-C(17)-O(2) -102.10(13)  
N(1)-C(14)-C(17)-N(2) -43.02(12)  
C(15)-C(14)-C(17)-N(2) -168.85(9)  
C(16)-C(14)-C(17)-N(2) 74.26(12)  
C(17)-N(2)-C(18)-C(19) 126.60(12)  
C(17)-N(2)-C(18)-C(23) -56.83(16)  
C(23)-C(18)-C(19)-F(1) -179.48(10)  
N(2)-C(18)-C(19)-F(1) -2.75(17)  
C(23)-C(18)-C(19)-C(20) -0.20(17)  
N(2)-C(18)-C(19)-C(20) 176.52(11)  
F(1)-C(19)-C(20)-F(2) -0.08(16)  
C(18)-C(19)-C(20)-F(2) -179.36(10)  
F(1)-C(19)-C(20)-C(21) -179.50(10)  
C(18)-C(19)-C(20)-C(21) 1.22(18)  
F(2)-C(20)-C(21)-C(22) 179.23(10)  
C(19)-C(20)-C(21)-C(22) -1.38(17)  
F(2)-C(20)-C(21)-C(24) 0.88(17)  
C(19)-C(20)-C(21)-C(24) -179.73(11)  
C(20)-C(21)-C(22)-F(3) -176.45(10)  
C(24)-C(21)-C(22)-F(3) 1.95(17)  
C(20)-C(21)-C(22)-C(23) 0.58(17)  
C(24)-C(21)-C(22)-C(23) 178.98(11)  
F(3)-C(22)-C(23)-F(4) 1.59(16)  
C(21)-C(22)-C(23)-F(4) -175.49(10)  
F(3)-C(22)-C(23)-C(18) 177.49(10)  
C(21)-C(22)-C(23)-C(18) 0.41(18)  
C(19)-C(18)-C(23)-F(4) 175.27(10)

N(2)-C(18)-C(23)-F(4) -1.40(17)  
C(19)-C(18)-C(23)-C(22) -0.60(17)  
N(2)-C(18)-C(23)-C(22) -177.28(11)  
C(20)-C(21)-C(24)-F(5A) -60.2(6)  
C(22)-C(21)-C(24)-F(5A) 121.5(6)  
C(20)-C(21)-C(24)-F(5) -12.51(17)  
C(22)-C(21)-C(24)-F(5) 169.18(11)  
C(20)-C(21)-C(24)-F(6) -131.72(12)  
C(22)-C(21)-C(24)-F(6) 49.96(15)  
C(20)-C(21)-C(24)-F(7) 109.07(13)  
C(22)-C(21)-C(24)-F(7) -69.24(15)  
C(20)-C(21)-C(24)-F(6A) 179.1(7)  
C(22)-C(21)-C(24)-F(6A) 0.8(7)  
C(20)-C(21)-C(24)-F(7A) 57.2(5)  
C(22)-C(21)-C(24)-F(7A) -121.1(5)  
C(25)-O(3)-C(26)-C(30) 177.81(10)  
C(25)-O(3)-C(26)-C(27) 75.92(13)  
O(3)-C(26)-C(27)-C(28) 36.69(14)  
C(30)-C(26)-C(27)-C(28) -81.37(10)  
O(3)-C(26)-C(27)-C(31) 147.84(10)  
C(30)-C(26)-C(27)-C(31) 29.78(8)  
C(38)-N(3)-C(28)-C(27) -169.86(10)  
C(29)-N(3)-C(28)-C(27) -35.61(13)  
C(26)-C(27)-C(28)-N(3) 65.37(12)  
C(31)-C(27)-C(28)-N(3) -26.81(13)  
C(28)-N(3)-C(29)-C(30) 34.07(13)  
C(38)-N(3)-C(29)-C(30) 168.25(10)  
N(3)-C(29)-C(30)-C(26) -63.10(12)  
N(3)-C(29)-C(30)-C(31) 30.04(13)  
O(3)-C(26)-C(30)-C(29) -40.76(13)  
C(27)-C(26)-C(30)-C(29) 80.69(10)



O(3)-C(26)-C(30)-C(31) -151.25(10)  
C(27)-C(26)-C(30)-C(31) -29.81(8)  
C(29)-C(30)-C(31)-C(32) 44.81(14)  
C(26)-C(30)-C(31)-C(32) 154.47(10)  
C(29)-C(30)-C(31)-C(27) -80.06(10)  
C(26)-C(30)-C(31)-C(27) 29.60(8)  
C(28)-C(27)-C(31)-C(32) -45.54(14)  
C(26)-C(27)-C(31)-C(32) -153.37(11)  
C(28)-C(27)-C(31)-C(30) 78.51(10)  
C(26)-C(27)-C(31)-C(30) -29.32(8)  
C(30)-C(31)-C(32)-C(33) 38.10(15)  
C(27)-C(31)-C(32)-C(33) 143.74(11)  
C(30)-C(31)-C(32)-C(37) -143.74(11)  
C(27)-C(31)-C(32)-C(37) -38.10(16)  
C(37)-C(32)-C(33)-C(34) 2.41(17)  
C(31)-C(32)-C(33)-C(34) -179.37(11)  
C(32)-C(33)-C(34)-C(35) -1.34(18)  
C(33)-C(34)-C(35)-C(36) -0.88(18)  
C(34)-C(35)-C(36)-C(37) 1.98(18)  
C(35)-C(36)-C(37)-C(32) -0.88(18)  
C(33)-C(32)-C(37)-C(36) -1.30(17)  
C(31)-C(32)-C(37)-C(36) -179.48(11)  
C(28)-N(3)-C(38)-C(41) -64.04(12)  
C(29)-N(3)-C(38)-C(41) 161.37(10)  
C(28)-N(3)-C(38)-C(40) 58.68(13)  
C(29)-N(3)-C(38)-C(40) -75.90(12)  
C(28)-N(3)-C(38)-C(39) -177.44(10)  
C(29)-N(3)-C(38)-C(39) 47.98(13)  
C(42)-N(4)-C(41)-O(4) 8.25(17)  
C(42)-N(4)-C(41)-C(38) -166.80(10)  
N(3)-C(38)-C(41)-O(4) 145.86(11)

C(40)-C(38)-C(41)-O(4) 20.01(16)  
C(39)-C(38)-C(41)-O(4) -96.92(13)  
N(3)-C(38)-C(41)-N(4) -39.21(13)  
C(40)-C(38)-C(41)-N(4) -165.06(10)  
C(39)-C(38)-C(41)-N(4) 78.00(12)  
C(41)-N(4)-C(42)-C(43) -118.79(13)  
C(41)-N(4)-C(42)-C(47) 59.78(15)  
C(47)-C(42)-C(43)-F(8) -177.10(10)  
N(4)-C(42)-C(43)-F(8) 1.53(18)  
C(47)-C(42)-C(43)-C(44) 1.01(18)  
N(4)-C(42)-C(43)-C(44) 179.63(11)  
F(8)-C(43)-C(44)-F(9) -2.79(17)  
C(42)-C(43)-C(44)-F(9) 179.07(11)  
F(8)-C(43)-C(44)-C(45) 176.54(11)  
C(42)-C(43)-C(44)-C(45) -1.59(19)  
F(9)-C(44)-C(45)-C(46) -179.72(11)  
C(43)-C(44)-C(45)-C(46) 0.96(18)  
F(9)-C(44)-C(45)-C(48) 0.32(17)  
C(43)-C(44)-C(45)-C(48) -179.01(12)  
C(44)-C(45)-C(46)-F(10) 178.31(11)  
C(48)-C(45)-C(46)-F(10) -1.73(19)  
C(44)-C(45)-C(46)-C(47) 0.18(18)  
C(48)-C(45)-C(46)-C(47) -179.86(12)  
F(10)-C(46)-C(47)-F(11) -0.19(16)  
C(45)-C(46)-C(47)-F(11) 178.01(10)  
F(10)-C(46)-C(47)-C(42) -178.93(10)  
C(45)-C(46)-C(47)-C(42) -0.73(19)  
C(43)-C(42)-C(47)-F(11) -178.60(10)  
N(4)-C(42)-C(47)-F(11) 2.74(17)  
C(43)-C(42)-C(47)-C(46) 0.13(18)  
N(4)-C(42)-C(47)-C(46) -178.53(11)

C(46)-C(45)-C(48)-F(13) -0.33(19)  
C(44)-C(45)-C(48)-F(13) 179.63(12)  
C(46)-C(45)-C(48)-F(12) 121.43(13)  
C(44)-C(45)-C(48)-F(12) -58.61(15)  
C(46)-C(45)-C(48)-F(14) -120.87(13)  
C(44)-C(45)-C(48)-F(14) 59.09(15)

---

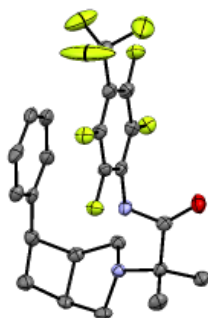

**Figure S7.** Structure determination of compound **11h**.

### Structure Determination

Colorless needles of **11h** were grown from a hexanes solution of the compound at 150 °C. A crystal of dimensions 0.18 x 0.06 x 0.02 mm was mounted on a Rigaku AFC10K Saturn 944+ CCD-based X-ray diffractometer equipped with a low temperature device and Micromax-007HF Cu-target micro-focus rotating anode ( $\lambda = 1.54187 \text{ \AA}$ ) operated at 1.2 kW power (40 kV, 30 mA). The X-ray intensities were measured at 85(1) K with the detector placed at a distance 42.00 mm from the crystal. A total of 2028 images were collected with an oscillation width of 1.0° in  $\omega$ . The exposure times were 5 sec. for the low angle images, 25 sec. for high angle. The integration of the data yielded a total of 31795 reflections to a maximum  $2\theta$  value of 136.48° of which 3805 were independent and 3330 were greater than  $2\sigma(I)$ . The final cell constants (Table S15) were based on the xyz centroids 21356 reflections above  $10\sigma(I)$ . Analysis of the data showed negligible decay during data collection; the data were processed with CrystalClear 2.0 and corrected for absorption. The structure was solved and refined with the Bruker SHELXTL (version 2014/6) software package, using the space group P2(1)/c with  $Z = 4$  for the formula  $C_{23}H_{21}N_2OF_7$ . All non-hydrogen atoms were refined anisotropically with the hydrogen atoms placed in both idealized and refined positions. Full matrix least-squares refinement based on  $F^2$  converged at  $R1 = 0.0550$  and  $wR2 = 0.1561$  [based on  $I > 2\sigma(I)$ ],  $R1 = 0.0602$  and  $wR2 =$

0.1621 for all data. Additional details are presented below. Acknowledgement is made for funding from NSF grant CHE-0840456 for X-ray instrumentation.

**Table S15.** Crystal data and structure refinement for **11h**.

|                                 |                                                                      |
|---------------------------------|----------------------------------------------------------------------|
| Empirical formula               | C <sub>23</sub> H <sub>21</sub> F <sub>7</sub> N <sub>2</sub> O      |
| Formula weight                  | 474.42                                                               |
| Temperature                     | 85(2) K                                                              |
| Wavelength                      | 1.54178 Å                                                            |
| Crystal system, space group     | Monoclinic, P2(1)/c                                                  |
| Unit cell dimensions a =        | 6.22970(10) Å $\alpha = 90^\circ$ .                                  |
| b =                             | 24.9877(5) Å $\beta = 100.085(7)^\circ$ .                            |
| c =                             | 13.5847(10) Å $\gamma = 90^\circ$ .                                  |
| Volume                          | 2082.00(17) Å <sup>3</sup>                                           |
| Z, Calculated density           | 4, 1.514 Mg/m <sup>3</sup>                                           |
| Absorption coefficient          | 1.195 mm <sup>-1</sup>                                               |
| F(000)                          | 976                                                                  |
| Crystal size                    | 0.180 x 0.060 x 0.020 mm                                             |
| Theta range for data collection | 3.537 to 68.245 $^\circ$ .                                           |
| Limiting indices                | -7 $\leq$ h $\leq$ 7, -30 $\leq$ k $\leq$ 30, -15 $\leq$ l $\leq$ 16 |
| Reflections collected / unique  | 31795 / 3805 [R(int) = 0.0794]                                       |
| Completeness to theta =         | 67.679 99.6 %                                                        |
| Absorption correction           | Semi-empirical from equivalents                                      |
| Max. and min. transmission      | 0.976 and 0.682                                                      |
| Refinement method               | Full-matrix least-squares on F <sup>2</sup>                          |

|                                      |                                       |
|--------------------------------------|---------------------------------------|
| Data / restraints / parameters       | 3805 / 51 / 333                       |
| Goodness-of-fit on                   | $F^2$ 1.132                           |
| Final R indices [ $I > 2\sigma(I)$ ] | R1 = 0.0550, wR2 = 0.1561             |
| R indices (all data)                 | R1 = 0.0602, wR2 = 0.1621             |
| Extinction coefficient               | 0.0034(4)                             |
| Largest diff. peak and hole          | 0.302 and -0.349 e. $\text{\AA}^{-3}$ |

Atomic coordinates ( $\times 10^4$ ) and equivalent isotropic displacement parameters ( $\text{\AA}^2 \times 10^3$ ) for **11h**.

U(eq) is defined as one third of the trace of the orthogonalized Uij tensor.

---

|       | x        | y       | z       | U(eq) |
|-------|----------|---------|---------|-------|
| O(1)  | 5110(2)  | 3502(1) | 9092(1) | 32(1) |
| N(1)  | 7384(2)  | 3311(1) | 8003(1) | 23(1) |
| N(2)  | 8168(2)  | 4354(1) | 7811(1) | 20(1) |
| F(1)  | 3319(3)  | 979(1)  | 7717(1) | 43(1) |
| F(2)  | 6494(3)  | 770(1)  | 7461(2) | 59(1) |
| F(3)  | 4087(3)  | 1059(1) | 6266(1) | 44(1) |
| F(1A) | 5221(12) | 828(2)  | 8006(3) | 56(2) |
| F(2A) | 6648(9)  | 900(2)  | 6719(4) | 49(1) |

---

|       |          |         |         |       |
|-------|----------|---------|---------|-------|
| F(3A) | 3266(10) | 1033(2) | 6595(5) | 63(2) |
| F(4)  | 9305(2)  | 1472(1) | 8122(1) | 28(1) |
| F(5)  | 10335(2) | 2495(1) | 8460(1) | 27(1) |
| F(6)  | 3116(2)  | 3006(1) | 7177(1) | 28(1) |
| F(7)  | 2044(2)  | 1984(1) | 6804(1) | 30(1) |
| C(1)  | 4970(3)  | 1121(1) | 7218(1) | 31(1) |
| C(2)  | 5631(3)  | 1693(1) | 7444(1) | 23(1) |
| C(3)  | 7737(3)  | 1839(1) | 7865(1) | 22(1) |
| C(4)  | 8283(3)  | 2371(1) | 8050(1) | 21(1) |
| C(5)  | 6761(3)  | 2776(1) | 7832(1) | 21(1) |
| C(6)  | 4646(3)  | 2628(1) | 7427(1) | 22(1) |
| C(7)  | 4101(3)  | 2101(1) | 7234(1) | 24(1) |
| C(8)  | 6555(3)  | 3640(1) | 8647(1) | 24(1) |
| C(9)  | 7720(3)  | 4185(1) | 8794(1) | 23(1) |
| C(10) | 9879(3)  | 4087(1) | 9511(1) | 30(1) |
| C(11) | 6302(3)  | 4571(1) | 9279(1) | 28(1) |
| C(12) | 9627(3)  | 4813(1) | 7787(1) | 26(1) |
| C(13) | 9421(3)  | 4921(1) | 6675(1) | 26(1) |
| C(14) | 10411(3) | 4479(1) | 6092(1) | 29(1) |
| C(15) | 8112(3)  | 4344(1) | 5507(1) | 24(1) |
| C(16) | 7077(3)  | 4731(1) | 6196(1) | 24(1) |
| C(17) | 6196(3)  | 4486(1) | 7072(1) | 23(1) |
| C(18) | 7331(3)  | 3772(1) | 5397(1) | 22(1) |
| C(19) | 5124(3)  | 3669(1) | 5053(1) | 27(1) |
| C(20) | 4353(3)  | 3150(1) | 4914(1) | 31(1) |

|       |         |         |         |       |
|-------|---------|---------|---------|-------|
| C(21) | 5774(3) | 2719(1) | 5118(1) | 32(1) |
| C(22) | 7965(3) | 2817(1) | 5458(1) | 30(1) |
| C(23) | 8739(3) | 3340(1) | 5601(1) | 25(1) |

---

**Bond lengths [Å] and angles [°] for 11h.**

---

|            |            |
|------------|------------|
| O(1)-C(8)  | 1.219(2)   |
| N(1)-C(8)  | 1.365(2)   |
| N(1)-C(5)  | 1.401(2)   |
| N(1)-H(1N) | 0.87(2)    |
| N(2)-C(12) | 1.469(2)   |
| N(2)-C(9)  | 1.472(2)   |
| N(2)-C(17) | 1.482(2)   |
| F(1)-C(1)  | 1.374(3)   |
| F(2)-C(1)  | 1.292(2)   |
| F(3)-C(1)  | 1.323(3)   |
| F(1A)-C(1) | 1.285(5)   |
| F(2A)-C(1) | 1.451(5)   |
| F(3A)-C(1) | 1.255(6)   |
| F(4)-C(3)  | 1.3399(19) |
| F(5)-C(4)  | 1.3380(19) |
| F(6)-C(6)  | 1.3407(19) |
| F(7)-C(7)  | 1.343(2)   |
| C(1)-C(2)  | 1.505(2)   |
| C(2)-C(3)  | 1.384(2)   |
| C(2)-C(7)  | 1.391(2)   |
| C(3)-C(4)  | 1.385(2)   |



|              |          |
|--------------|----------|
| C(4)-C(5)    | 1.383(2) |
| C(5)-C(6)    | 1.386(2) |
| C(6)-C(7)    | 1.375(2) |
| C(8)-C(9)    | 1.540(2) |
| C(9)-C(11)   | 1.532(2) |
| C(9)-C(10)   | 1.536(2) |
| C(10)-H(10A) | 0.9800   |
| C(10)-H(10B) | 0.9800   |
| C(10)-H(10C) | 0.9800   |
| C(11)-H(11A) | 0.9800   |
| C(11)-H(11B) | 0.9800   |
| C(11)-H(11C) | 0.9800   |
| C(12)-C(13)  | 1.517(3) |
| C(12)-H(12A) | 0.9900   |
| C(12)-H(12B) | 0.9900   |
| C(13)-C(14)  | 1.550(3) |
| C(13)-C(16)  | 1.565(2) |
| C(13)-H(13)  | 1.0000   |
| C(14)-C(15)  | 1.548(2) |
| C(14)-H(14A) | 0.9900   |
| C(14)-H(14B) | 0.9900   |
| C(15)-C(18)  | 1.509(2) |
| C(15)-C(16)  | 1.561(2) |
| C(15)-H(15)  | 1.0000   |
| C(16)-C(17)  | 1.524(2) |

|                  |            |
|------------------|------------|
| C(16)-H(16)      | 1.0000     |
| C(17)-H(17A)     | 0.9900     |
| C(17)-H(17B)     | 0.9900     |
| C(18)-C(23)      | 1.388(2)   |
| C(18)-C(19)      | 1.397(2)   |
| C(19)-C(20)      | 1.384(3)   |
| C(19)-H(19)      | 0.9500     |
| C(20)-C(21)      | 1.390(3)   |
| C(20)-H(20)      | 0.9500     |
| C(21)-C(22)      | 1.384(3)   |
| C(21)-H(21)      | 0.9500     |
| C(22)-C(23)      | 1.396(3)   |
| C(22)-H(22)      | 0.9500     |
| C(23)-H(23)      | 0.9500     |
|                  |            |
| C(8)-N(1)-C(5)   | 123.72(14) |
| C(8)-N(1)-H(1N)  | 117.8(16)  |
| C(5)-N(1)-H(1N)  | 118.5(15)  |
| C(12)-N(2)-C(9)  | 117.44(13) |
| C(12)-N(2)-C(17) | 104.66(13) |
| C(9)-N(2)-C(17)  | 114.36(13) |
| F(3A)-C(1)-F(1A) | 115.3(5)   |
| F(2)-C(1)-F(3)   | 109.37(19) |
| F(2)-C(1)-F(1)   | 106.15(18) |
| F(3)-C(1)-F(1)   | 103.49(17) |

|                  |            |
|------------------|------------|
| F(3A)-C(1)-F(2A) | 102.3(4)   |
| F(1A)-C(1)-F(2A) | 100.4(4)   |
| F(3A)-C(1)-C(2)  | 118.2(3)   |
| F(1A)-C(1)-C(2)  | 112.5(3)   |
| F(2)-C(1)-C(2)   | 115.42(16) |
| F(3)-C(1)-C(2)   | 111.33(16) |
| F(1)-C(1)-C(2)   | 110.29(15) |
| F(2A)-C(1)-C(2)  | 105.2(2)   |
| C(3)-C(2)-C(7)   | 117.28(15) |
| C(3)-C(2)-C(1)   | 122.67(15) |
| C(7)-C(2)-C(1)   | 120.05(15) |
| F(4)-C(3)-C(2)   | 121.51(15) |
| F(4)-C(3)-C(4)   | 117.67(15) |
| C(2)-C(3)-C(4)   | 120.81(15) |
| F(5)-C(4)-C(5)   | 119.28(14) |
| F(5)-C(4)-C(3)   | 118.97(14) |
| C(5)-C(4)-C(3)   | 121.76(15) |
| C(4)-C(5)-C(6)   | 117.32(15) |
| C(4)-C(5)-N(1)   | 120.21(15) |
| C(6)-C(5)-N(1)   | 122.46(15) |
| F(6)-C(6)-C(7)   | 118.98(15) |
| F(6)-C(6)-C(5)   | 119.85(14) |
| C(7)-C(6)-C(5)   | 121.10(15) |
| F(7)-C(7)-C(6)   | 118.39(15) |
| F(7)-C(7)-C(2)   | 119.86(15) |

|                     |            |
|---------------------|------------|
| C(6)-C(7)-C(2)      | 121.72(16) |
| O(1)-C(8)-N(1)      | 122.90(16) |
| O(1)-C(8)-C(9)      | 123.92(15) |
| N(1)-C(8)-C(9)      | 113.10(14) |
| N(2)-C(9)-C(11)     | 115.13(14) |
| N(2)-C(9)-C(10)     | 109.67(14) |
| C(11)-C(9)-C(10)    | 109.53(14) |
| N(2)-C(9)-C(8)      | 107.17(13) |
| C(11)-C(9)-C(8)     | 108.57(14) |
| C(10)-C(9)-C(8)     | 106.38(14) |
| C(9)-C(10)-H(10A)   | 109.5      |
| C(9)-C(10)-H(10B)   | 109.5      |
| H(10A)-C(10)-H(10B) | 109.5      |
| C(9)-C(10)-H(10C)   | 109.5      |
| H(10A)-C(10)-H(10C) | 109.5      |
| H(10B)-C(10)-H(10C) | 109.5      |
| C(9)-C(11)-H(11A)   | 109.5      |
| C(9)-C(11)-H(11B)   | 109.5      |
| H(11A)-C(11)-H(11B) | 109.5      |
| C(9)-C(11)-H(11C)   | 109.5      |
| H(11A)-C(11)-H(11C) | 109.5      |
| H(11B)-C(11)-H(11C) | 109.5      |
| N(2)-C(12)-C(13)    | 102.53(13) |
| N(2)-C(12)-H(12A)   | 111.3      |
| C(13)-C(12)-H(12A)  | 111.3      |

|                     |            |
|---------------------|------------|
| N(2)-C(12)-H(12B)   | 111.3      |
| C(13)-C(12)-H(12B)  | 111.3      |
| H(12A)-C(12)-H(12B) | 109.2      |
| C(12)-C(13)-C(14)   | 114.21(15) |
| C(12)-C(13)-C(16)   | 105.69(14) |
| C(14)-C(13)-C(16)   | 89.81(13)  |
| C(12)-C(13)-H(13)   | 114.8      |
| C(14)-C(13)-H(13)   | 114.8      |
| C(16)-C(13)-H(13)   | 114.8      |
| C(15)-C(14)-C(13)   | 90.11(13)  |
| C(15)-C(14)-H(14A)  | 113.6      |
| C(13)-C(14)-H(14A)  | 113.6      |
| C(15)-C(14)-H(14B)  | 113.6      |
| C(13)-C(14)-H(14B)  | 113.6      |
| H(14A)-C(14)-H(14B) | 110.9      |
| C(18)-C(15)-C(14)   | 120.64(14) |
| C(18)-C(15)-C(16)   | 119.12(14) |
| C(14)-C(15)-C(16)   | 90.02(13)  |
| C(18)-C(15)-H(15)   | 108.5      |
| C(14)-C(15)-H(15)   | 108.5      |
| C(16)-C(15)-H(15)   | 108.5      |
| C(17)-C(16)-C(15)   | 117.46(14) |
| C(17)-C(16)-C(13)   | 103.59(13) |
| C(15)-C(16)-C(13)   | 89.08(13)  |
| C(17)-C(16)-H(16)   | 114.5      |

|                     |            |
|---------------------|------------|
| C(15)-C(16)-H(16)   | 114.5      |
| C(13)-C(16)-H(16)   | 114.5      |
| N(2)-C(17)-C(16)    | 104.48(13) |
| N(2)-C(17)-H(17A)   | 110.9      |
| C(16)-C(17)-H(17A)  | 110.9      |
| N(2)-C(17)-H(17B)   | 110.9      |
| C(16)-C(17)-H(17B)  | 110.9      |
| H(17A)-C(17)-H(17B) | 108.9      |
| C(23)-C(18)-C(19)   | 118.27(16) |
| C(23)-C(18)-C(15)   | 122.38(15) |
| C(19)-C(18)-C(15)   | 119.33(15) |
| C(20)-C(19)-C(18)   | 121.10(17) |
| C(20)-C(19)-H(19)   | 119.5      |
| C(18)-C(19)-H(19)   | 119.5      |
| C(19)-C(20)-C(21)   | 120.30(17) |
| C(19)-C(20)-H(20)   | 119.8      |
| C(21)-C(20)-H(20)   | 119.8      |
| C(22)-C(21)-C(20)   | 119.16(17) |
| C(22)-C(21)-H(21)   | 120.4      |
| C(20)-C(21)-H(21)   | 120.4      |
| C(21)-C(22)-C(23)   | 120.47(17) |
| C(21)-C(22)-H(22)   | 119.8      |
| C(23)-C(22)-H(22)   | 119.8      |
| C(18)-C(23)-C(22)   | 120.69(17) |
| C(18)-C(23)-H(23)   | 119.7      |

C(22)-C(23)-H(23) 119.7

---

**Symmetry transformations used to generate equivalent atoms:**

Anisotropic displacement parameters ( $\text{Å}^2 \times 10^3$ ) for **11h**.

The anisotropic displacement factor exponent takes the form:

$$-2 \pi^2 [ h^2 a^{*2} U_{11} + \dots + 2 h k a^* b^* U_{12} ]$$

---

|       | U11    | U22   | U33    | U23    | U13    | U12    |
|-------|--------|-------|--------|--------|--------|--------|
| O(1)  | 40(1)  | 24(1) | 34(1)  | 0(1)   | 17(1)  | -2(1)  |
| N(1)  | 30(1)  | 17(1) | 23(1)  | -1(1)  | 10(1)  | -2(1)  |
| N(2)  | 21(1)  | 18(1) | 20(1)  | 0(1)   | 2(1)   | -3(1)  |
| F(1)  | 56(1)  | 31(1) | 49(1)  | -9(1)  | 27(1)  | -20(1) |
| F(2)  | 38(1)  | 19(1) | 111(2) | -6(1)  | -15(1) | 2(1)   |
| F(3)  | 70(1)  | 33(1) | 29(1)  | -10(1) | 6(1)   | -15(1) |
| F(1A) | 118(4) | 22(2) | 31(2)  | -1(2)  | 20(2)  | -9(2)  |
| F(2A) | 70(3)  | 26(2) | 52(3)  | -10(2) | 19(2)  | -1(2)  |
| F(3A) | 61(3)  | 37(3) | 76(4)  | -5(3)  | -24(3) | -11(2) |
| F(4)  | 27(1)  | 21(1) | 36(1)  | 0(1)   | 2(1)   | 7(1)   |
| F(5)  | 22(1)  | 26(1) | 31(1)  | -2(1)  | 1(1)   | -1(1)  |

|       |       |       |       |       |       |       |
|-------|-------|-------|-------|-------|-------|-------|
| F(6)  | 29(1) | 23(1) | 30(1) | 4(1)  | 2(1)  | 8(1)  |
| F(7)  | 24(1) | 31(1) | 34(1) | -3(1) | -1(1) | -3(1) |
| C(1)  | 39(1) | 23(1) | 29(1) | -3(1) | 3(1)  | -1(1) |
| C(2)  | 26(1) | 22(1) | 22(1) | 0(1)  | 5(1)  | -1(1) |
| C(3)  | 27(1) | 20(1) | 22(1) | 1(1)  | 5(1)  | 3(1)  |
| C(4)  | 22(1) | 22(1) | 19(1) | -1(1) | 3(1)  | -2(1) |
| C(5)  | 27(1) | 18(1) | 19(1) | 1(1)  | 7(1)  | -1(1) |
| C(6)  | 26(1) | 21(1) | 19(1) | 3(1)  | 4(1)  | 4(1)  |
| C(7)  | 24(1) | 25(1) | 20(1) | -1(1) | 2(1)  | -2(1) |
| C(8)  | 31(1) | 21(1) | 20(1) | 4(1)  | 6(1)  | 0(1)  |
| C(9)  | 29(1) | 19(1) | 21(1) | -1(1) | 6(1)  | 0(1)  |
| C(10) | 32(1) | 31(1) | 25(1) | 1(1)  | 0(1)  | 3(1)  |
| C(11) | 32(1) | 26(1) | 25(1) | -4(1) | 7(1)  | -1(1) |
| C(12) | 29(1) | 21(1) | 28(1) | -2(1) | 3(1)  | -6(1) |
| C(13) | 30(1) | 19(1) | 30(1) | 2(1)  | 6(1)  | -6(1) |
| C(14) | 26(1) | 28(1) | 33(1) | 0(1)  | 8(1)  | -3(1) |
| C(15) | 28(1) | 24(1) | 22(1) | 3(1)  | 6(1)  | -2(1) |
| C(16) | 26(1) | 21(1) | 26(1) | 2(1)  | 3(1)  | 2(1)  |
| C(17) | 22(1) | 21(1) | 26(1) | -1(1) | 3(1)  | 1(1)  |
| C(18) | 26(1) | 25(1) | 15(1) | -1(1) | 6(1)  | 0(1)  |
| C(19) | 25(1) | 33(1) | 24(1) | -4(1) | 5(1)  | 1(1)  |
| C(20) | 32(1) | 36(1) | 25(1) | -9(1) | 8(1)  | -7(1) |
| C(21) | 48(1) | 28(1) | 22(1) | -6(1) | 13(1) | -8(1) |
| C(22) | 44(1) | 26(1) | 21(1) | -2(1) | 10(1) | 4(1)  |
| C(23) | 29(1) | 27(1) | 21(1) | 0(1)  | 6(1)  | 1(1)  |





**Hydrogen coordinates ( x 10<sup>4</sup>) and isotropic displacement parameters (A<sup>2</sup> x 10<sup>3</sup>) for 11h.**

---

|        | x        | y       | z        | U(eq) |
|--------|----------|---------|----------|-------|
| H(1N)  | 8400(40) | 3440(9) | 7701(17) | 38(6) |
| H(10A) | 10840    | 3868    | 9177     | 45    |
| H(10B) | 9590     | 3901    | 10109    | 45    |
| H(10C) | 10585    | 4431    | 9705     | 45    |
| H(11A) | 6928     | 4931    | 9298     | 41    |
| H(11B) | 6248     | 4451    | 9961     | 41    |
| H(11C) | 4823     | 4576    | 8887     | 41    |
| H(12A) | 11147    | 4723    | 8090     | 32    |
| H(12B) | 9143     | 5125    | 8140     | 32    |
| H(13)  | 9785     | 5295    | 6501     | 32    |
| H(14A) | 11421    | 4617    | 5665     | 34    |
| H(14B) | 11090    | 4182    | 6520     | 34    |
| H(15)  | 7956     | 4508    | 4827     | 29    |
| H(16)  | 6133     | 5017    | 5831     | 29    |
| H(17A) | 5262     | 4744    | 7354     | 28    |
| H(17B) | 5335     | 4159    | 6860     | 28    |

---

|       |       |      |      |    |
|-------|-------|------|------|----|
| H(19) | 4135  | 3960 | 4912 | 33 |
| H(20) | 2847  | 3088 | 4677 | 37 |
| H(21) | 5247  | 2363 | 5025 | 38 |
| H(22) | 8950  | 2525 | 5596 | 36 |
| H(23) | 10245 | 3401 | 5841 | 30 |

---

**Torsion angles [°] for 11h.**

---

|                      |             |
|----------------------|-------------|
| F(3A)-C(1)-C(2)-C(3) | -160.0(4)   |
| F(1A)-C(1)-C(2)-C(3) | 61.7(4)     |
| F(2)-C(1)-C(2)-C(3)  | 1.3(3)      |
| F(3)-C(1)-C(2)-C(3)  | -124.1(2)   |
| F(1)-C(1)-C(2)-C(3)  | 121.62(19)  |
| F(2A)-C(1)-C(2)-C(3) | -46.7(3)    |
| F(3A)-C(1)-C(2)-C(7) | 20.2(5)     |
| F(1A)-C(1)-C(2)-C(7) | -118.1(4)   |
| F(2)-C(1)-C(2)-C(7)  | -178.5(2)   |
| F(3)-C(1)-C(2)-C(7)  | 56.1(2)     |
| F(1)-C(1)-C(2)-C(7)  | -58.2(2)    |
| F(2A)-C(1)-C(2)-C(7) | 133.5(3)    |
| C(7)-C(2)-C(3)-F(4)  | 177.89(15)  |
| C(1)-C(2)-C(3)-F(4)  | -1.9(3)     |
| C(7)-C(2)-C(3)-C(4)  | -1.0(3)     |
| C(1)-C(2)-C(3)-C(4)  | 179.22(16)  |
| F(4)-C(3)-C(4)-F(5)  | 0.9(2)      |
| C(2)-C(3)-C(4)-F(5)  | 179.76(15)  |
| F(4)-C(3)-C(4)-C(5)  | -178.44(15) |
| C(2)-C(3)-C(4)-C(5)  | 0.4(3)      |
| F(5)-C(4)-C(5)-C(6)  | -178.63(14) |

|                       |             |
|-----------------------|-------------|
| C(3)-C(4)-C(5)-C(6)   | 0.7(2)      |
| F(5)-C(4)-C(5)-N(1)   | 2.5(2)      |
| C(3)-C(4)-C(5)-N(1)   | -178.20(15) |
| C(8)-N(1)-C(5)-C(4)   | -118.70(19) |
| C(8)-N(1)-C(5)-C(6)   | 62.5(2)     |
| C(4)-C(5)-C(6)-F(6)   | -178.26(14) |
| N(1)-C(5)-C(6)-F(6)   | 0.6(2)      |
| C(4)-C(5)-C(6)-C(7)   | -1.3(2)     |
| N(1)-C(5)-C(6)-C(7)   | 177.56(16)  |
| F(6)-C(6)-C(7)-F(7)   | -0.4(2)     |
| C(5)-C(6)-C(7)-F(7)   | -177.37(15) |
| F(6)-C(6)-C(7)-C(2)   | 177.79(15)  |
| C(5)-C(6)-C(7)-C(2)   | 0.8(3)      |
| C(3)-C(2)-C(7)-F(7)   | 178.49(15)  |
| C(1)-C(2)-C(7)-F(7)   | -1.7(3)     |
| C(3)-C(2)-C(7)-C(6)   | 0.3(3)      |
| C(1)-C(2)-C(7)-C(6)   | -179.83(16) |
| C(5)-N(1)-C(8)-O(1)   | -3.9(3)     |
| C(5)-N(1)-C(8)-C(9)   | 172.84(14)  |
| C(12)-N(2)-C(9)-C(11) | 70.19(19)   |
| C(17)-N(2)-C(9)-C(11) | -53.04(18)  |
| C(12)-N(2)-C(9)-C(10) | -53.86(18)  |
| C(17)-N(2)-C(9)-C(10) | -177.09(13) |
| C(12)-N(2)-C(9)-C(8)  | -168.94(14) |
| C(17)-N(2)-C(9)-C(8)  | 67.83(16)   |

|                         |             |
|-------------------------|-------------|
| O(1)-C(8)-C(9)-N(2)     | -143.79(16) |
| N(1)-C(8)-C(9)-N(2)     | 39.51(18)   |
| O(1)-C(8)-C(9)-C(11)    | -18.8(2)    |
| N(1)-C(8)-C(9)-C(11)    | 164.45(14)  |
| O(1)-C(8)-C(9)-C(10)    | 98.95(19)   |
| N(1)-C(8)-C(9)-C(10)    | -77.75(17)  |
| C(9)-N(2)-C(12)-C(13)   | -171.52(13) |
| C(17)-N(2)-C(12)-C(13)  | -43.48(16)  |
| N(2)-C(12)-C(13)-C(14)  | -68.10(17)  |
| N(2)-C(12)-C(13)-C(16)  | 28.94(17)   |
| C(12)-C(13)-C(14)-C(15) | 114.68(15)  |
| C(16)-C(13)-C(14)-C(15) | 7.52(13)    |
| C(13)-C(14)-C(15)-C(18) | -132.01(16) |
| C(13)-C(14)-C(15)-C(16) | -7.55(13)   |
| C(18)-C(15)-C(16)-C(17) | 28.3(2)     |
| C(14)-C(15)-C(16)-C(17) | -97.39(16)  |
| C(18)-C(15)-C(16)-C(13) | 133.18(15)  |
| C(14)-C(15)-C(16)-C(13) | 7.47(13)    |
| C(12)-C(13)-C(16)-C(17) | -4.54(17)   |
| C(14)-C(13)-C(16)-C(17) | 110.61(14)  |
| C(12)-C(13)-C(16)-C(15) | -122.61(14) |
| C(14)-C(13)-C(16)-C(15) | -7.46(13)   |
| C(12)-N(2)-C(17)-C(16)  | 41.16(16)   |
| C(9)-N(2)-C(17)-C(16)   | 171.04(13)  |
| C(15)-C(16)-C(17)-N(2)  | 74.66(17)   |

|                         |             |
|-------------------------|-------------|
| C(13)-C(16)-C(17)-N(2)  | -21.48(16)  |
| C(14)-C(15)-C(18)-C(23) | -14.8(2)    |
| C(16)-C(15)-C(18)-C(23) | -124.14(18) |
| C(14)-C(15)-C(18)-C(19) | 166.79(16)  |
| C(16)-C(15)-C(18)-C(19) | 57.5(2)     |
| C(23)-C(18)-C(19)-C(20) | -0.3(3)     |
| C(15)-C(18)-C(19)-C(20) | 178.11(16)  |
| C(18)-C(19)-C(20)-C(21) | 0.2(3)      |
| C(19)-C(20)-C(21)-C(22) | -0.2(3)     |
| C(20)-C(21)-C(22)-C(23) | 0.4(3)      |
| C(19)-C(18)-C(23)-C(22) | 0.5(3)      |
| C(15)-C(18)-C(23)-C(22) | -177.90(16) |
| C(21)-C(22)-C(23)-C(18) | -0.5(3)     |

---

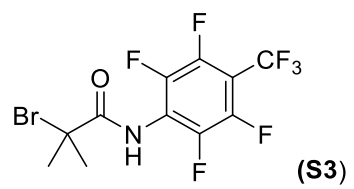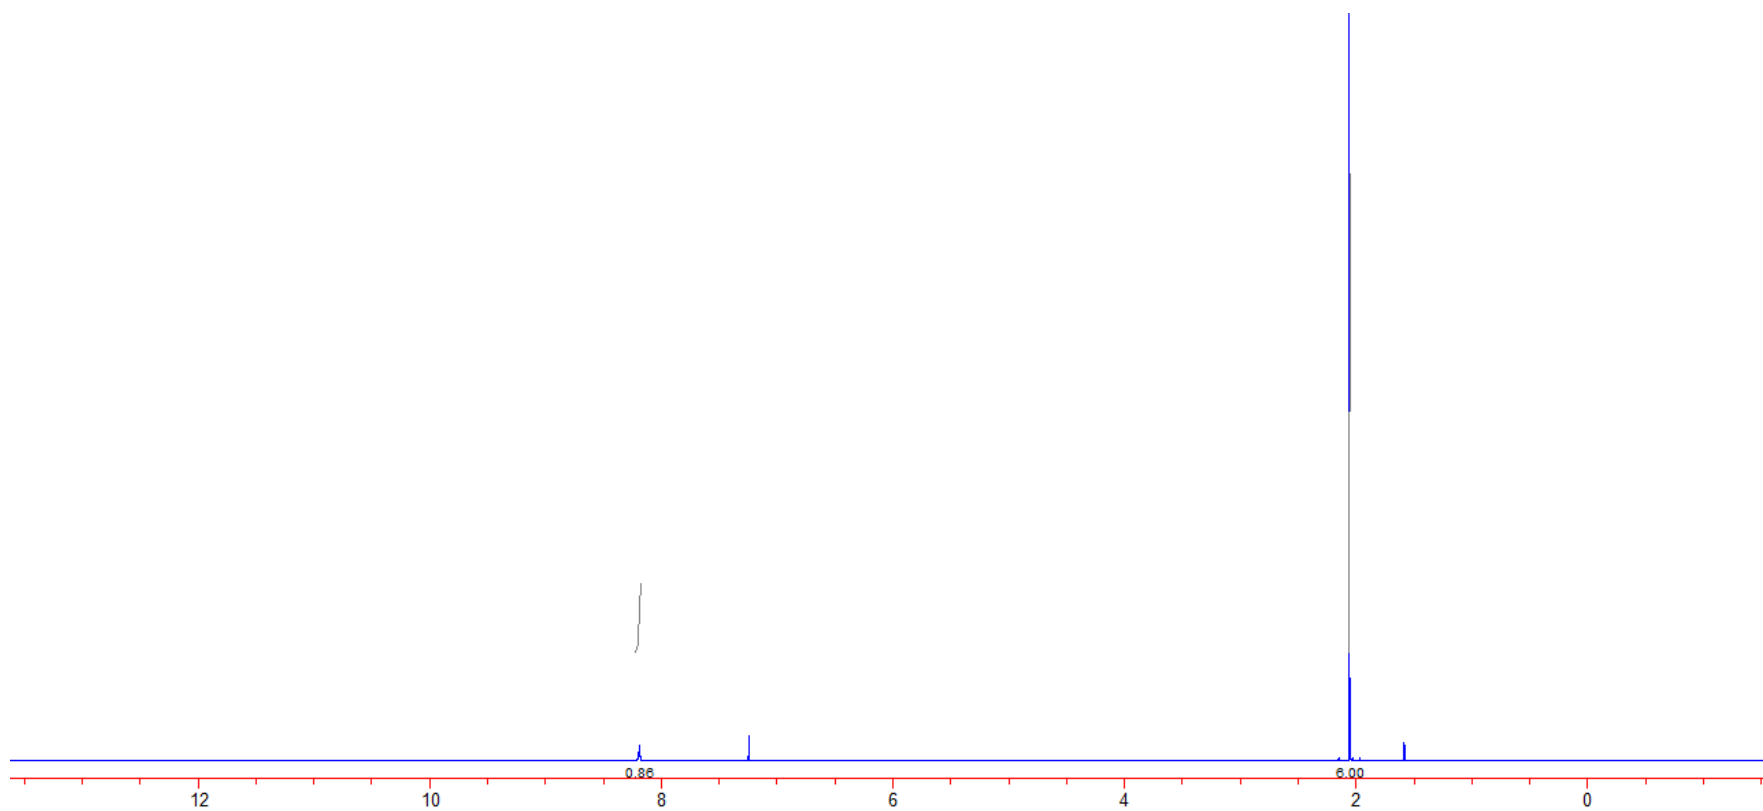

<sup>1</sup>H NMR Spectrum in CDCl<sub>3</sub>



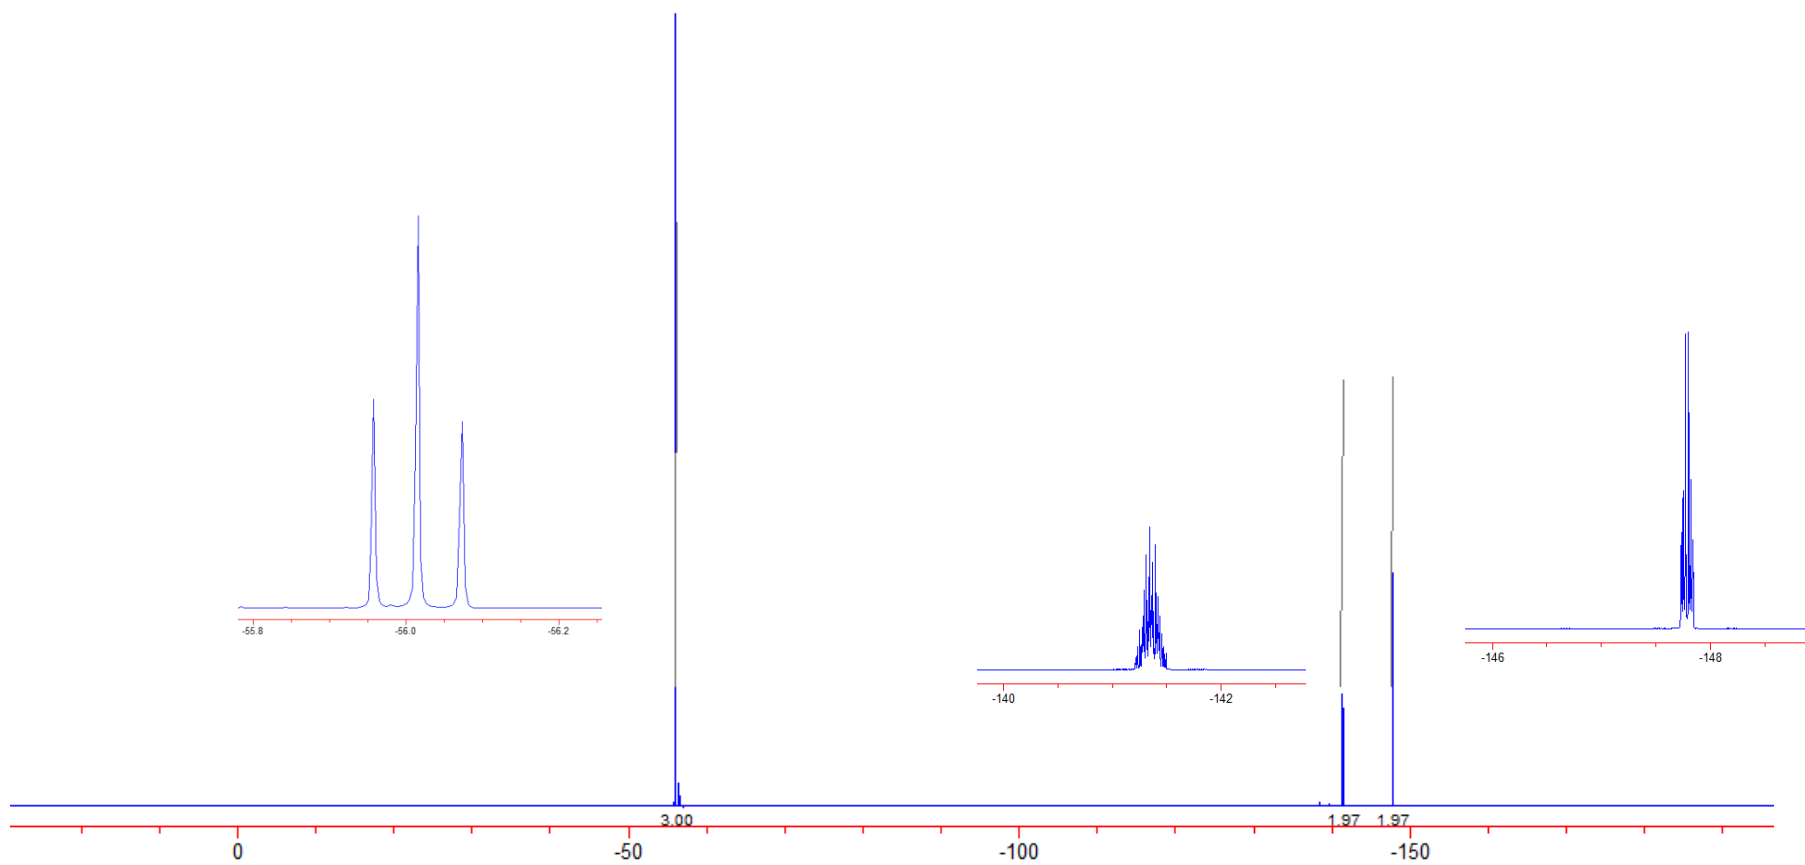

$^{19}\text{F}$  NMR Spectrum in  $\text{CDCl}_3$

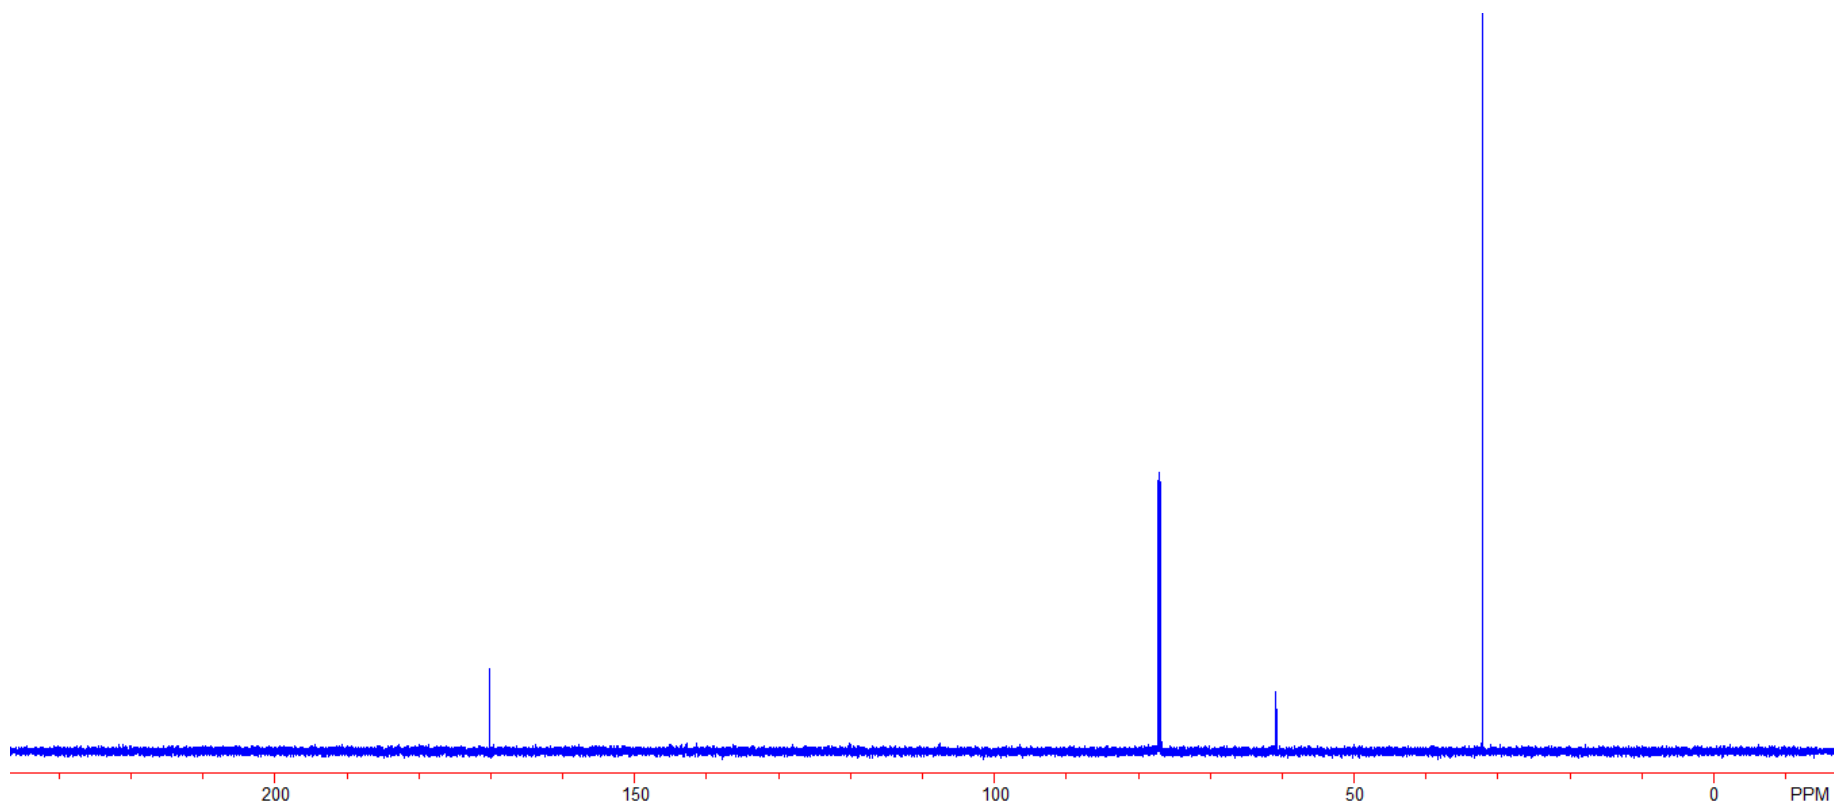

$^{13}\text{C}$  NMR Spectrum in  $\text{CDCl}_3$

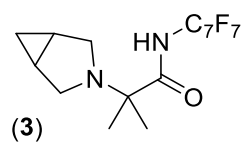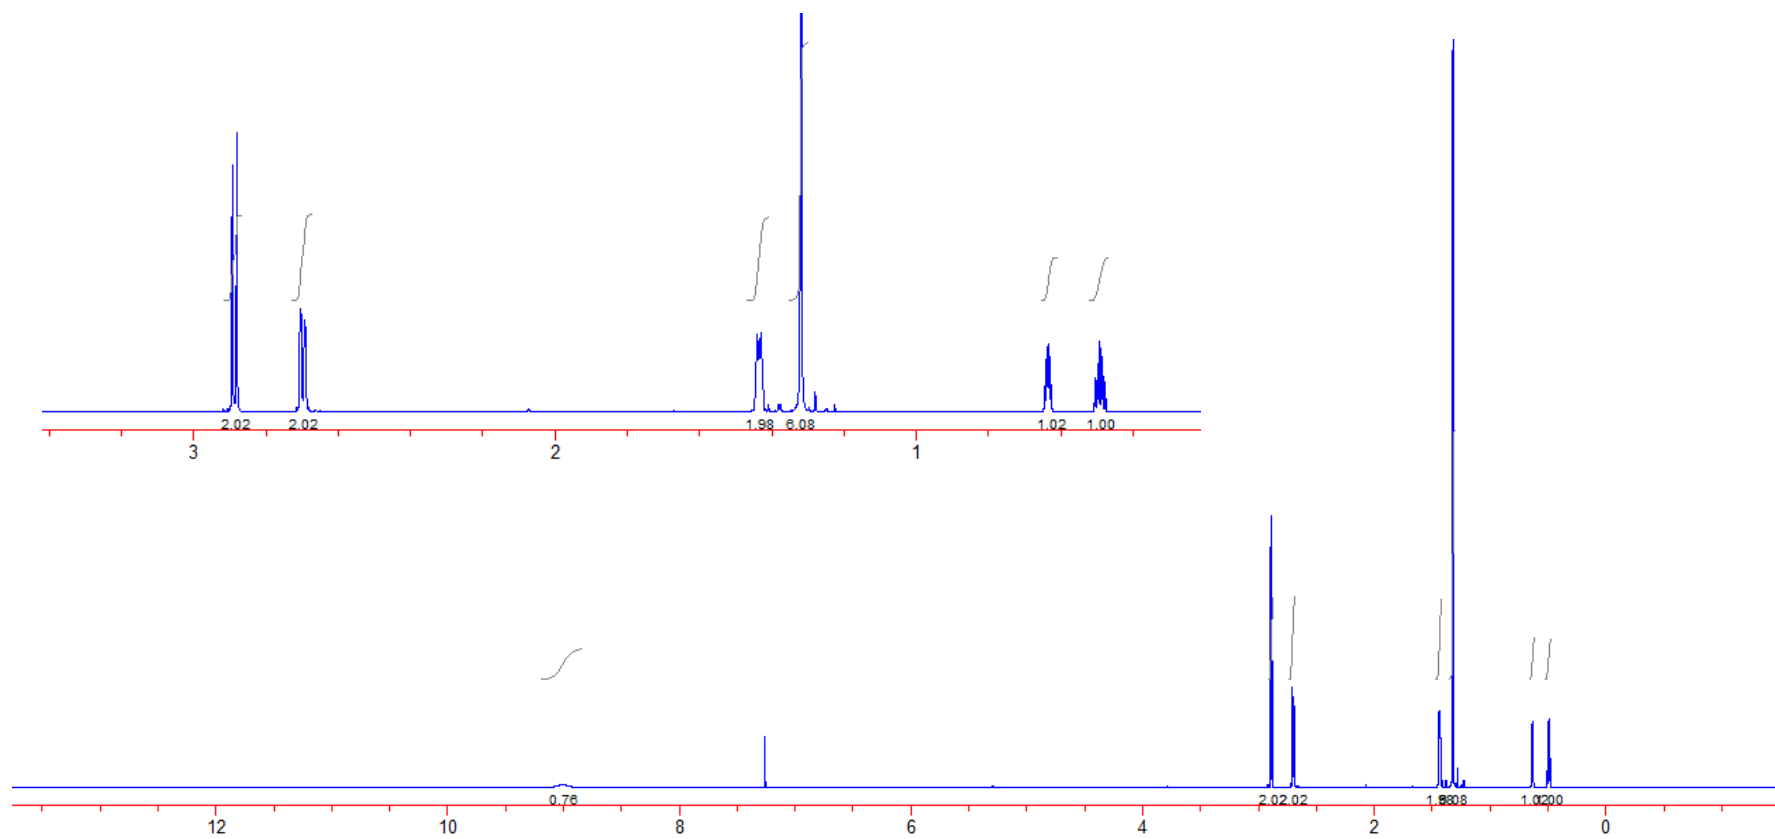

$^1\text{H}$  NMR Spectrum in  $\text{CDCl}_3$

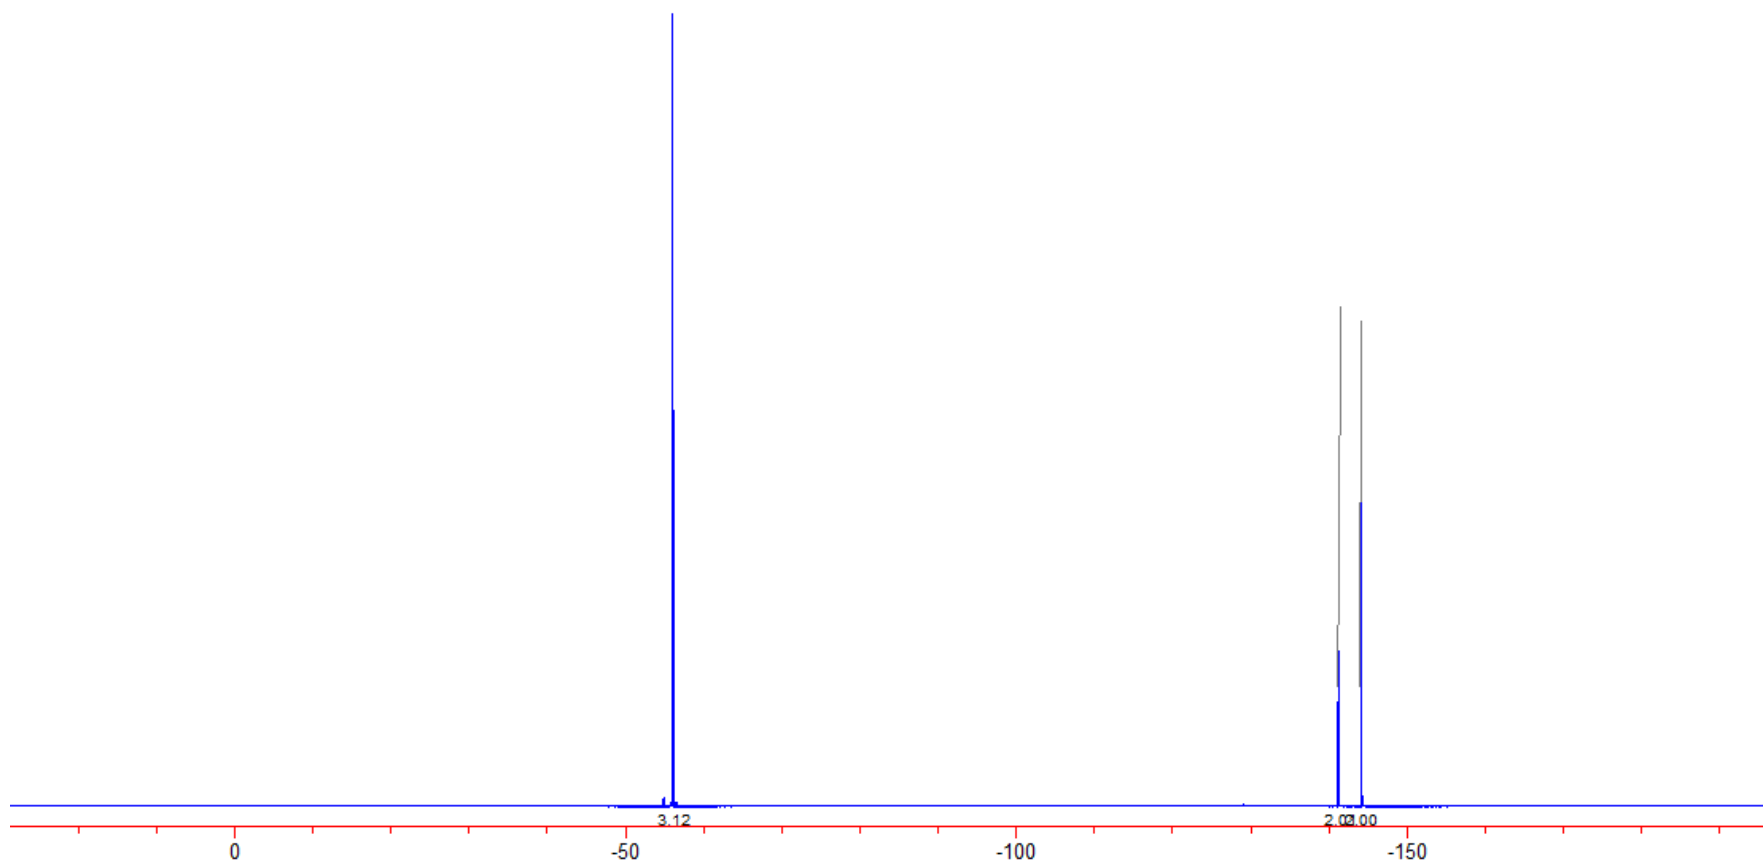

<sup>19</sup>F NMR Spectrum in CDCl<sub>3</sub>

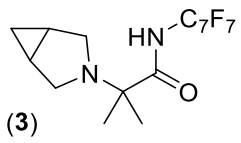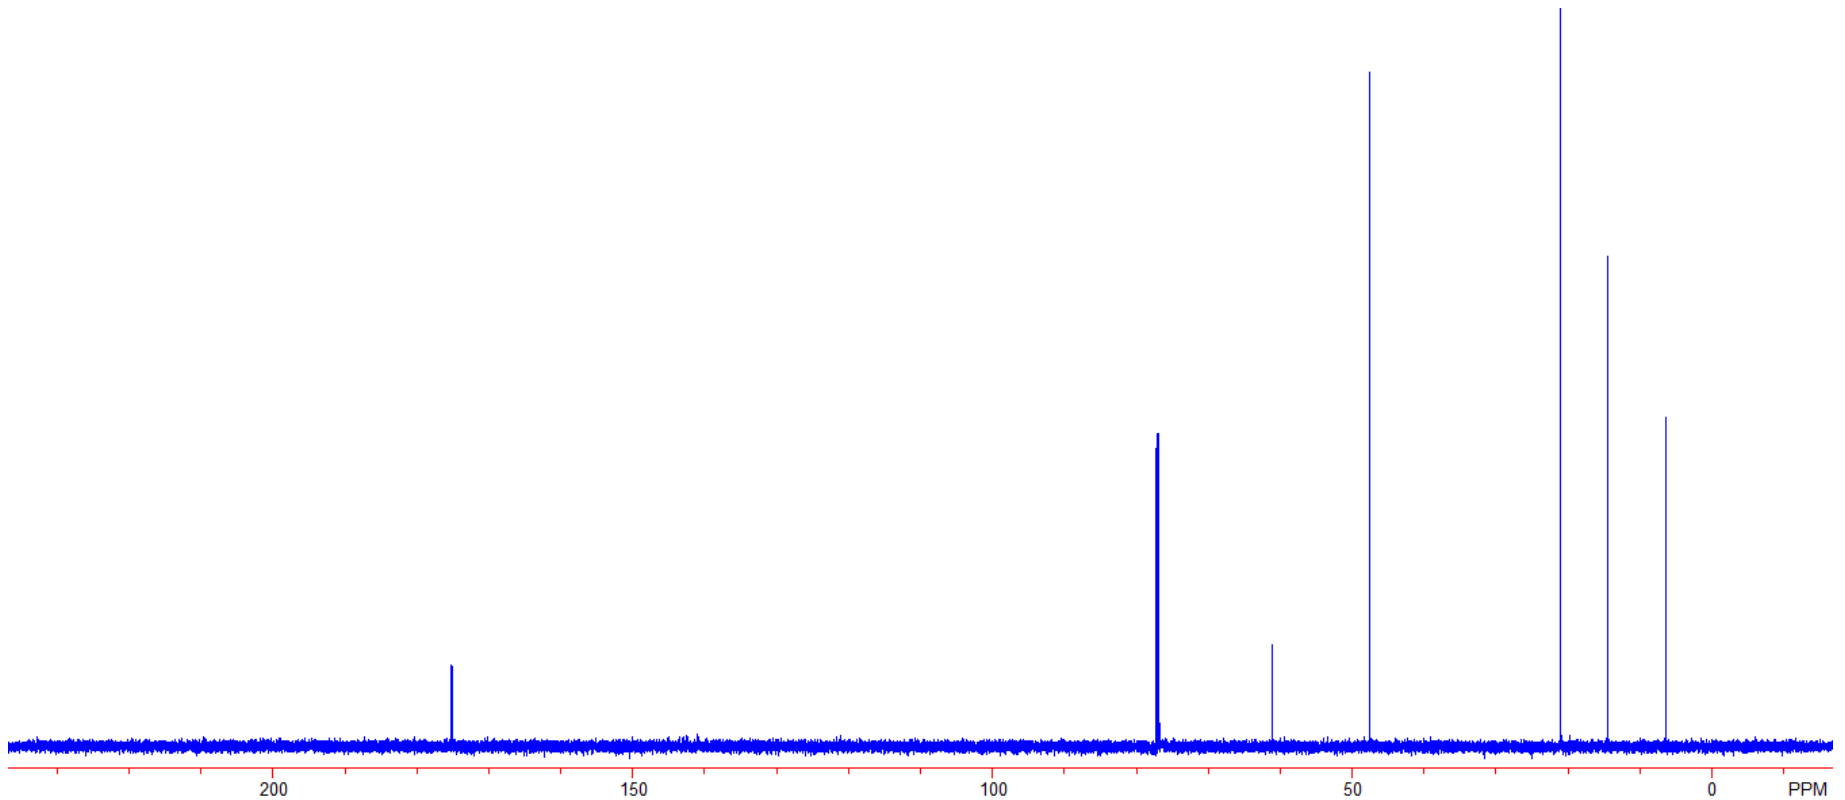

<sup>13</sup>C NMR Spectrum in CDCl<sub>3</sub>

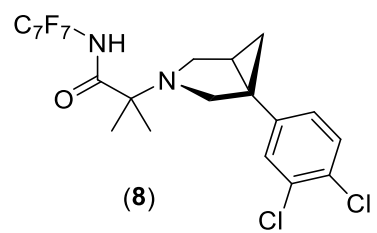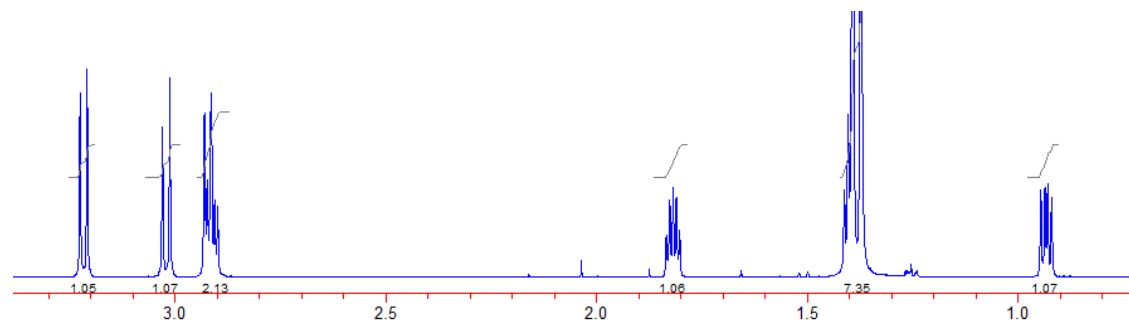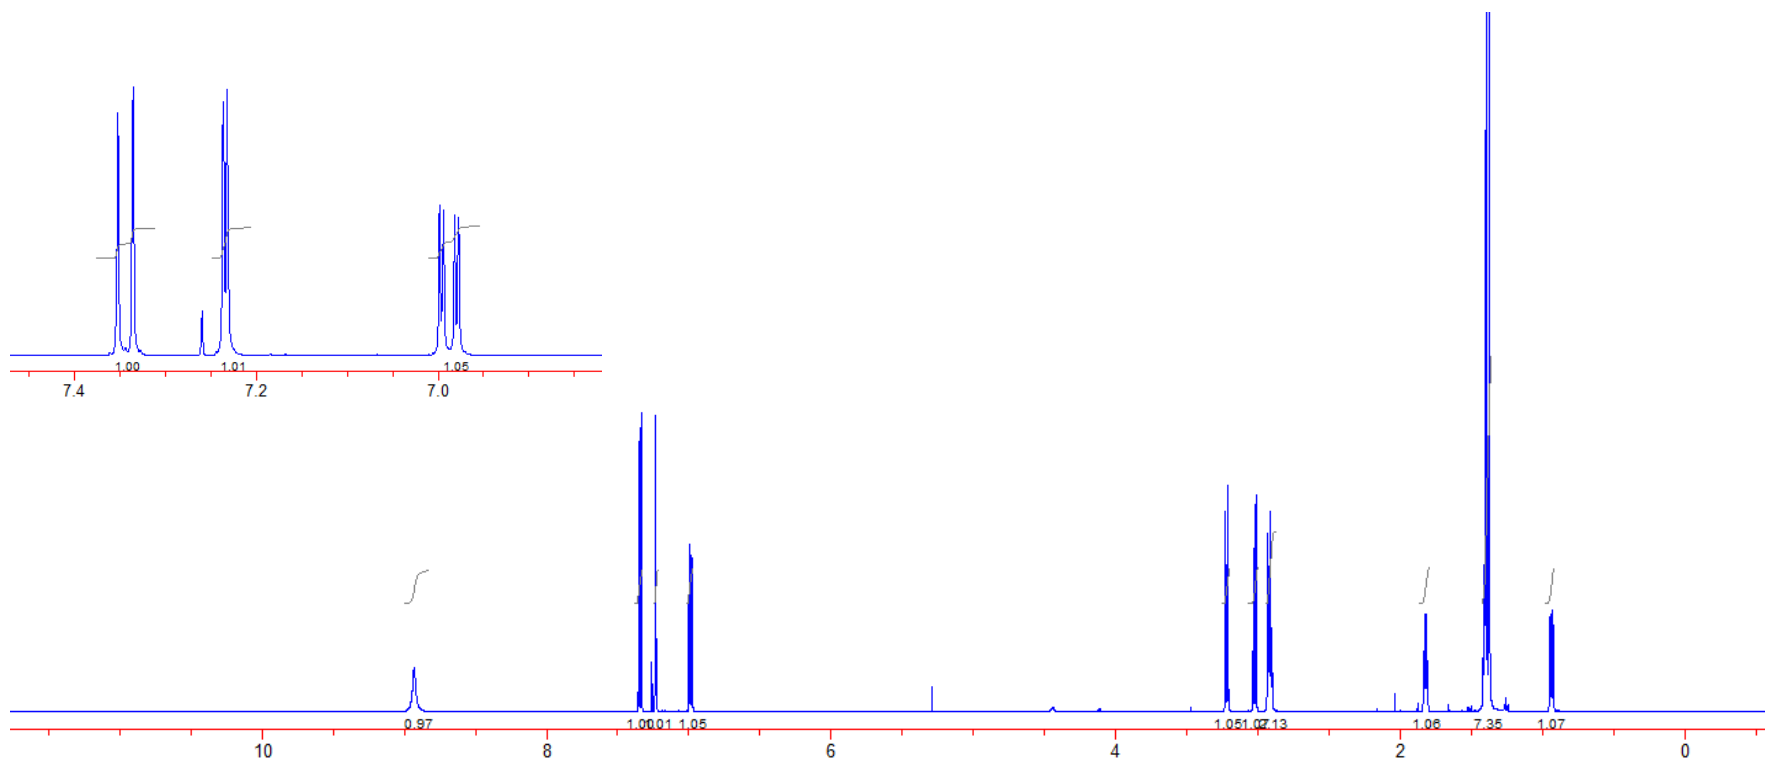

<sup>1</sup>H NMR Spectrum in CDCl<sub>3</sub>

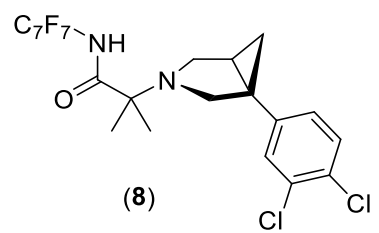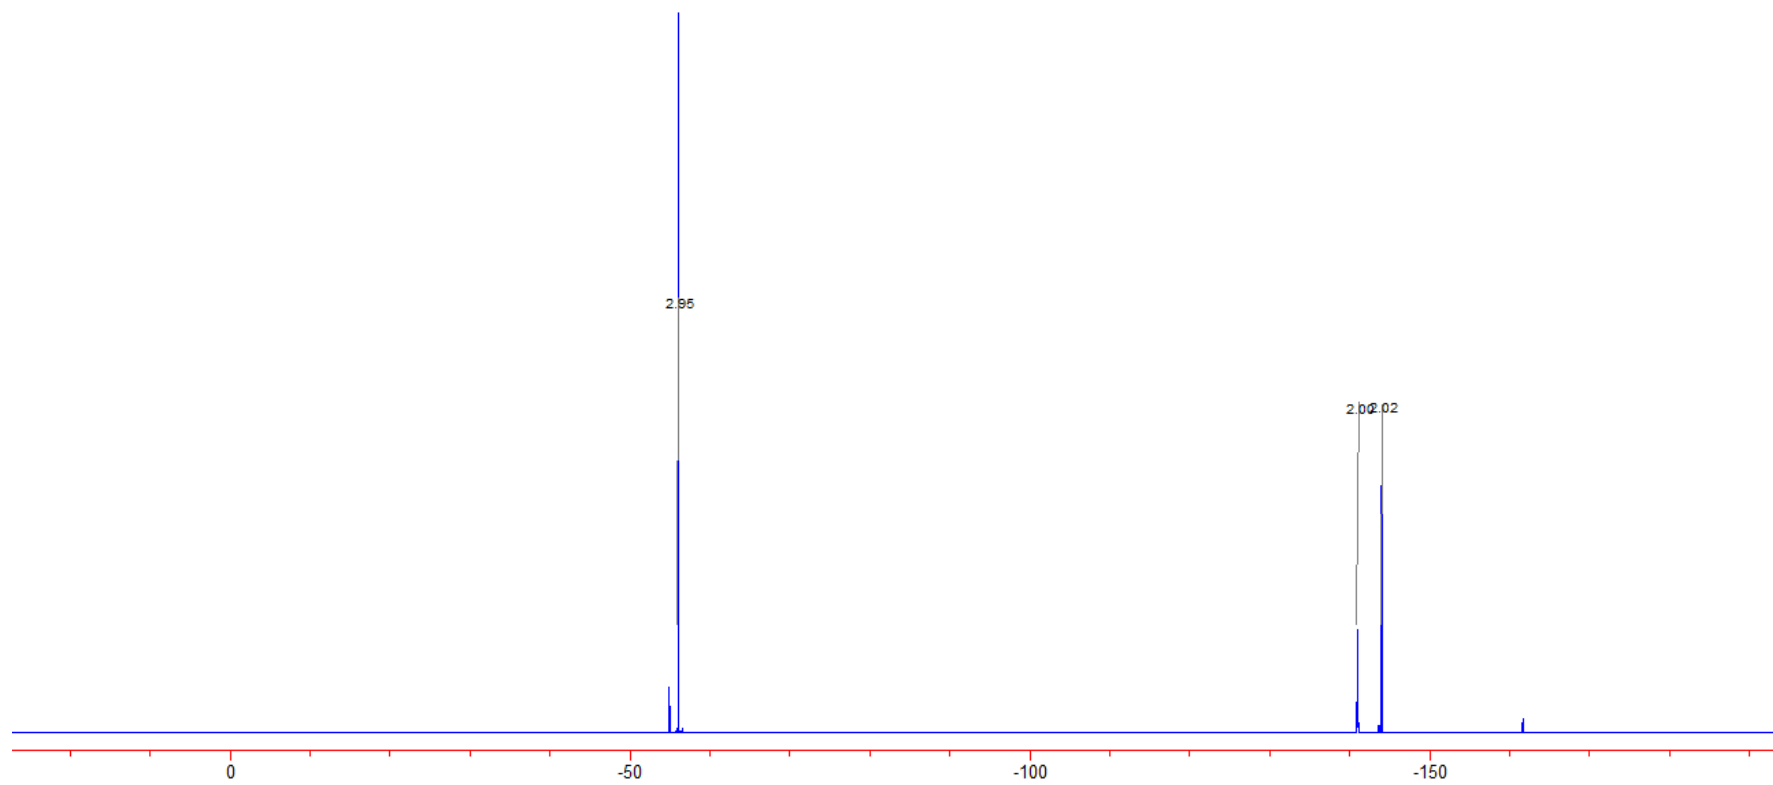

$^{19}\text{F}$  NMR Spectrum in  $\text{CDCl}_3$

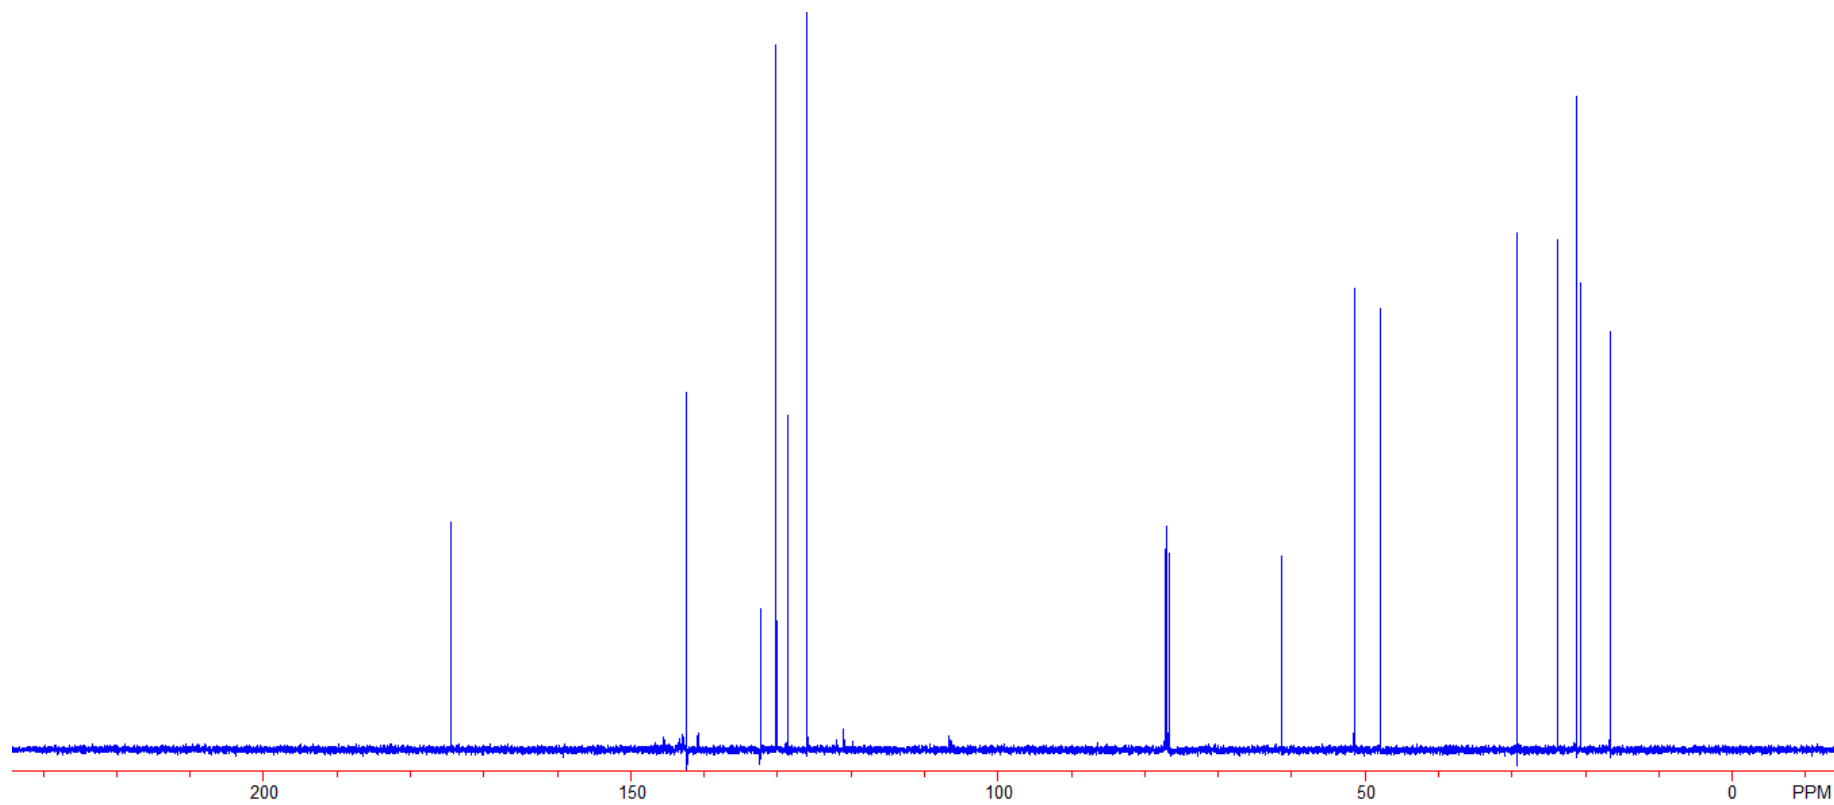

13C NMR Spectrum in CDCl<sub>3</sub>



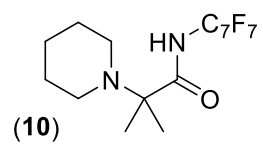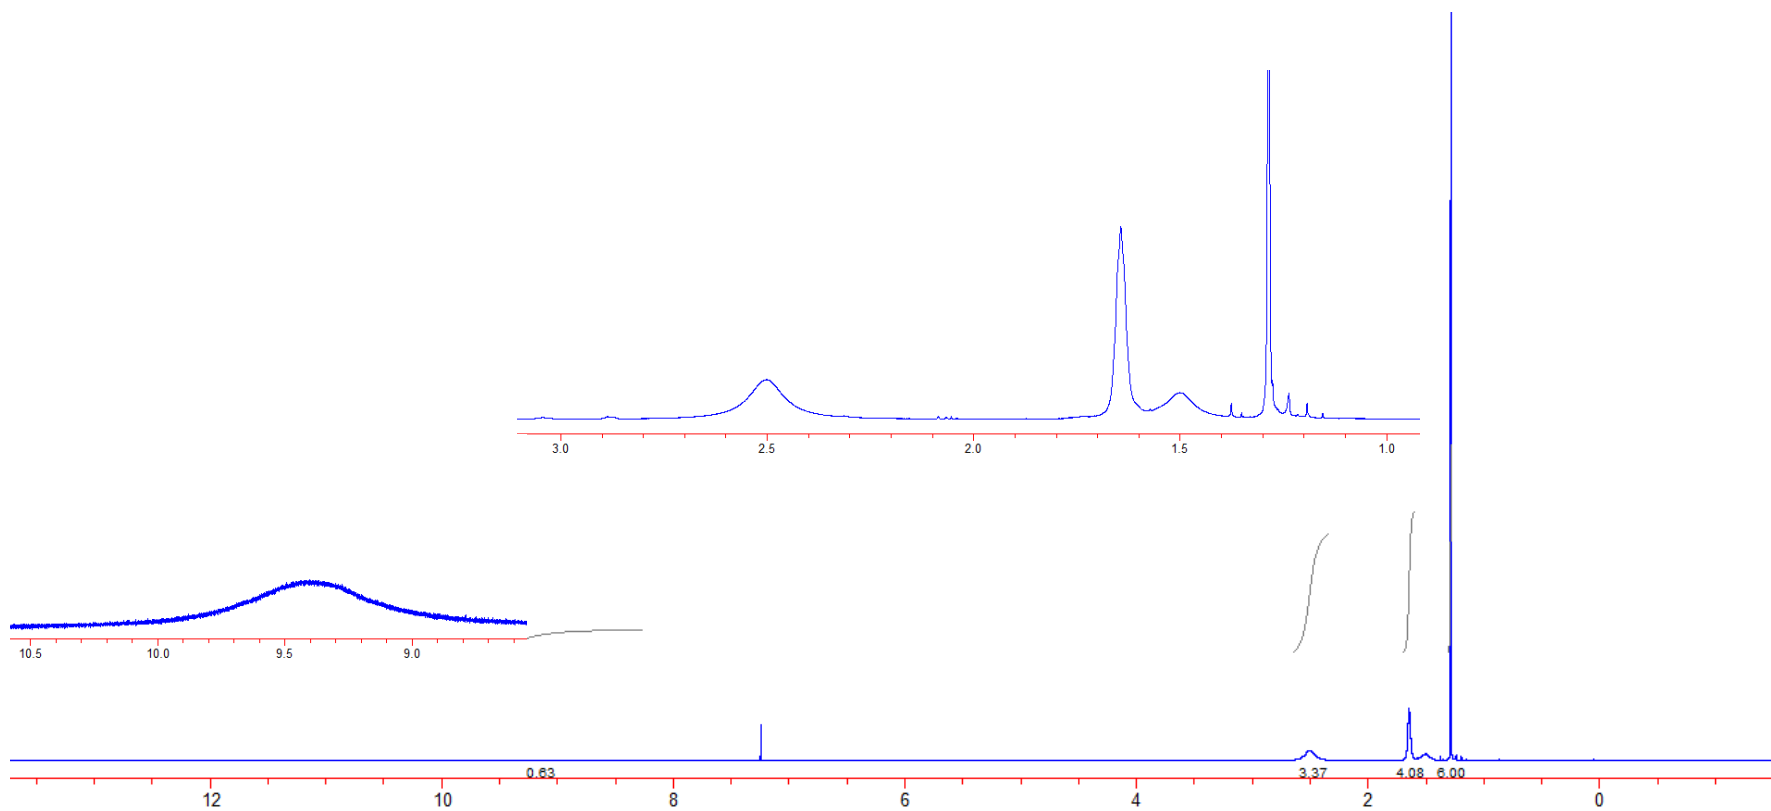

$^1\text{H}$  NMR Spectrum in  $\text{CDCl}_3$

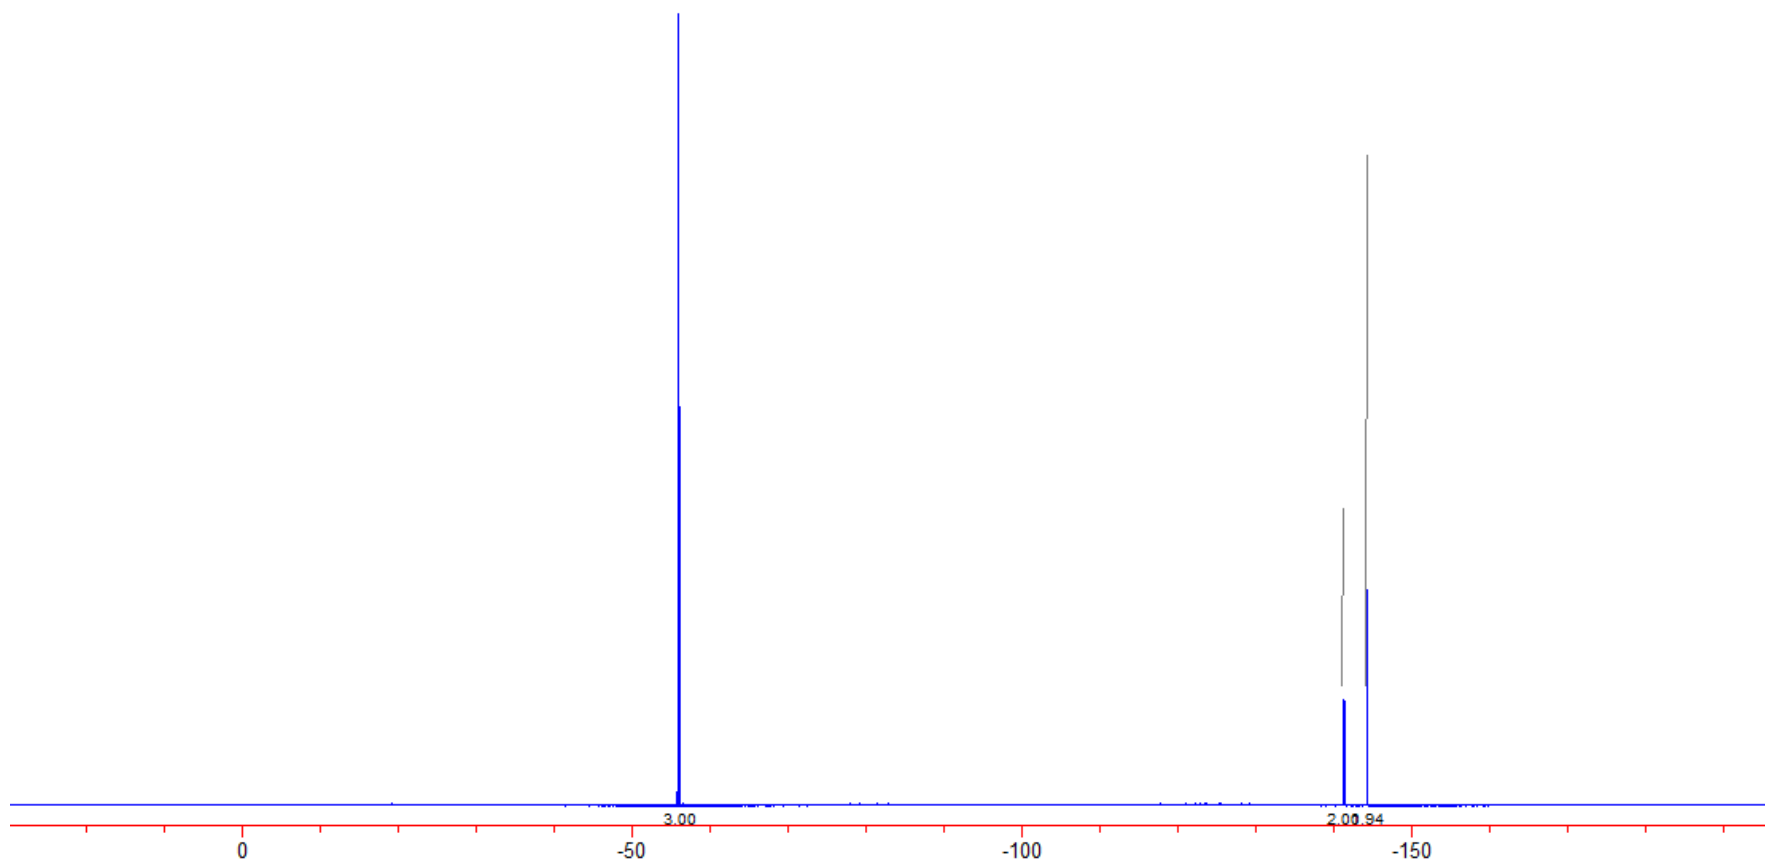

<sup>19</sup>F NMR Spectrum in CDCl<sub>3</sub>

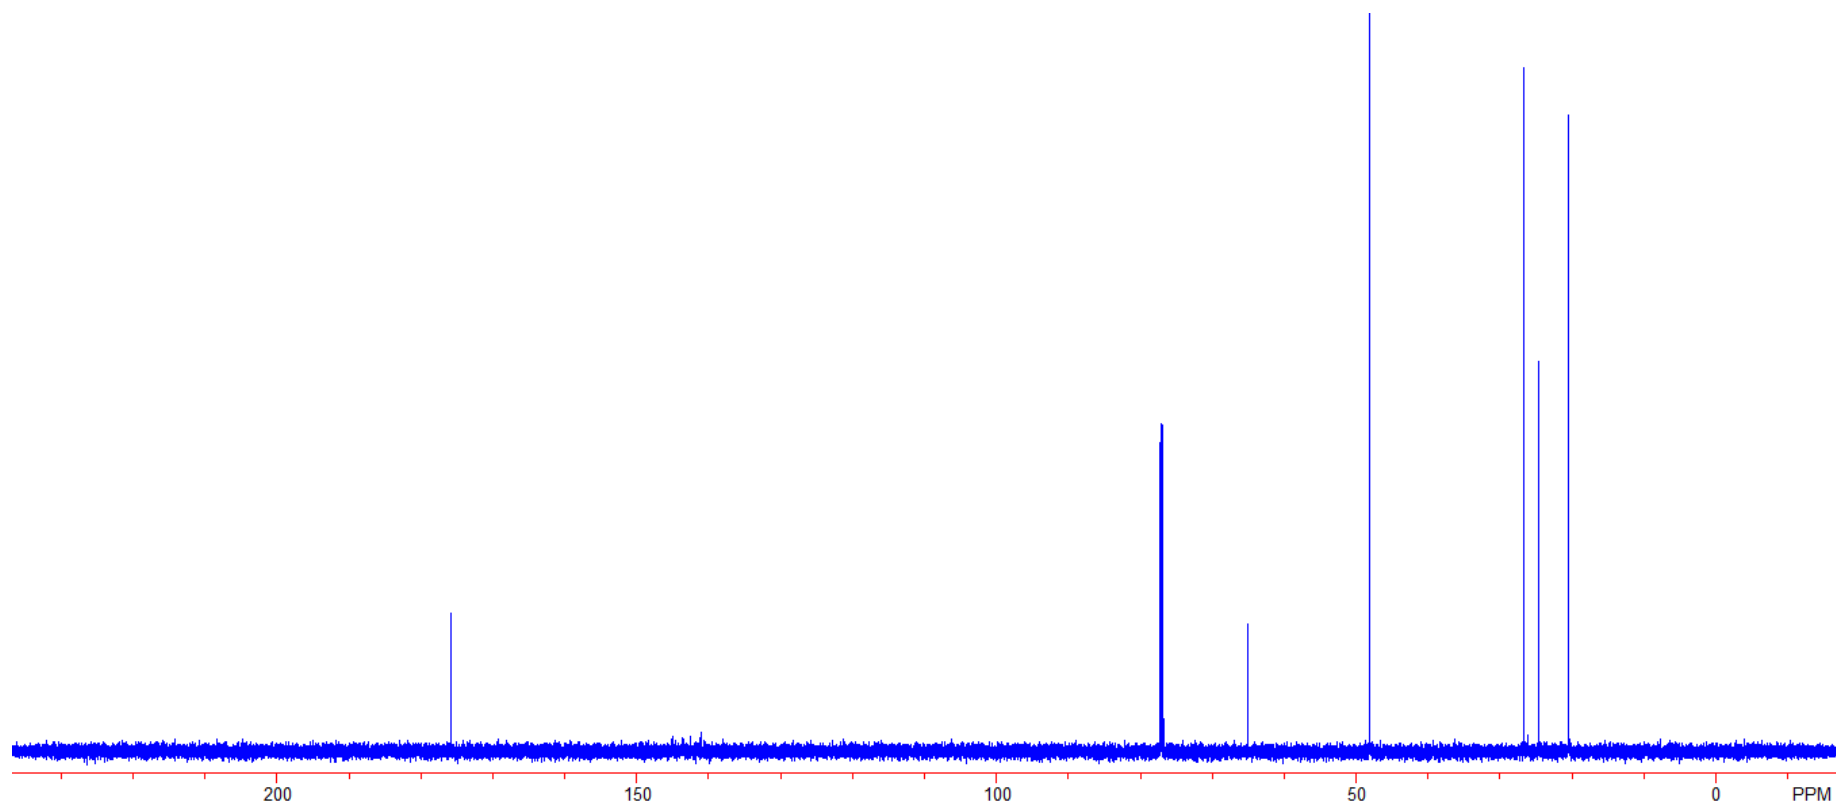

$^{13}\text{C}$  NMR Spectrum in  $\text{CDCl}_3$

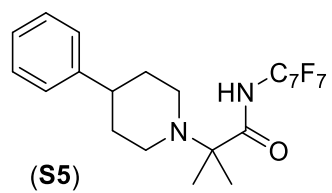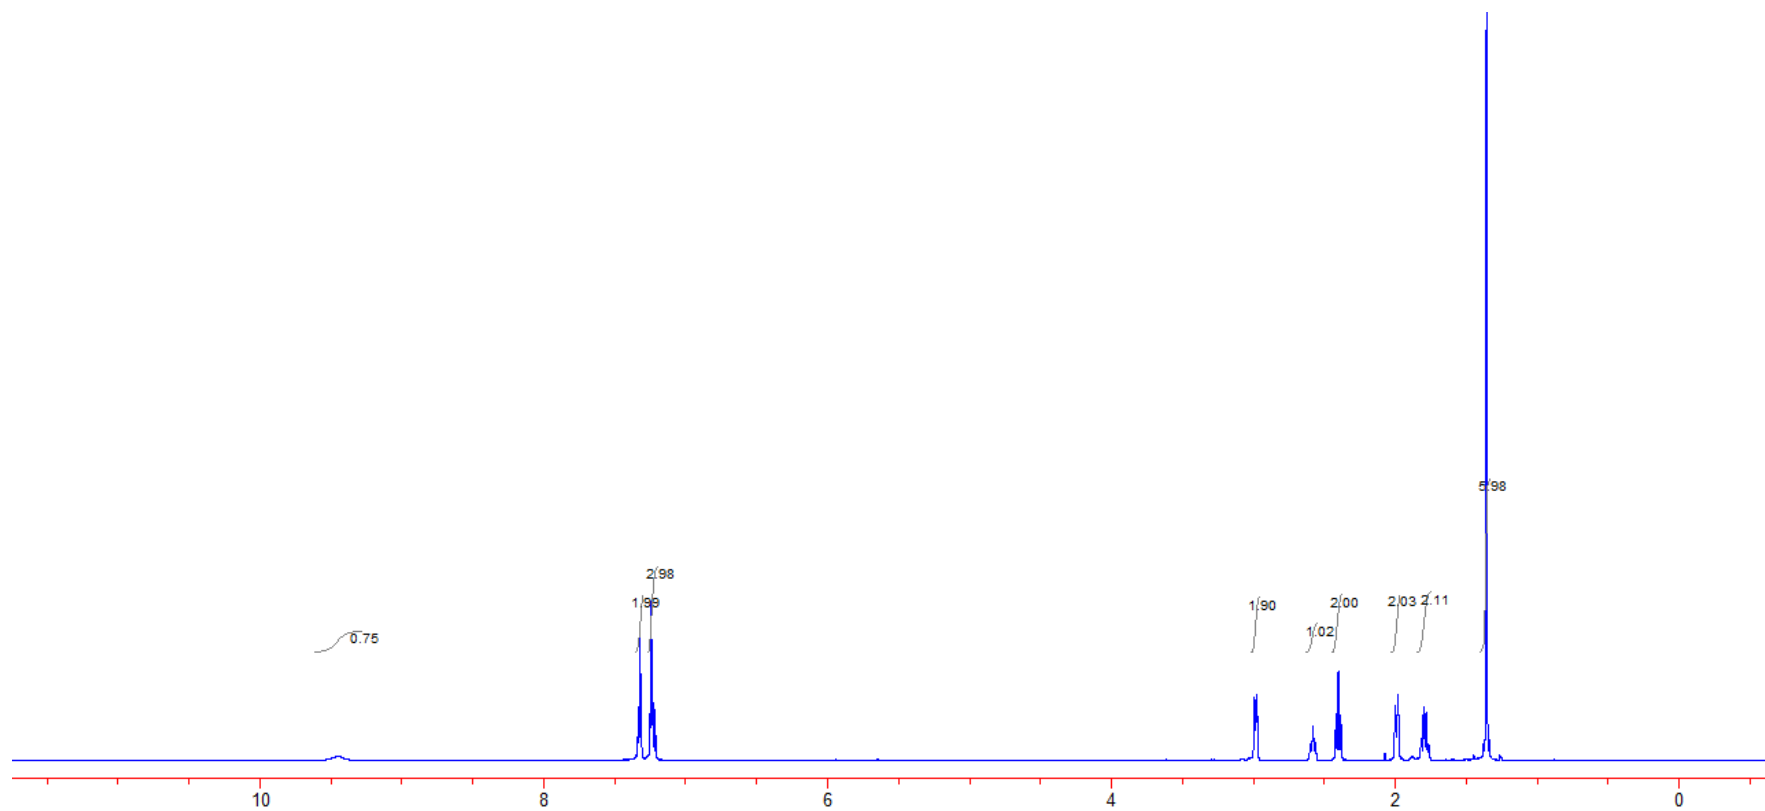

<sup>1</sup>H NMR Spectrum in CDCl<sub>3</sub>

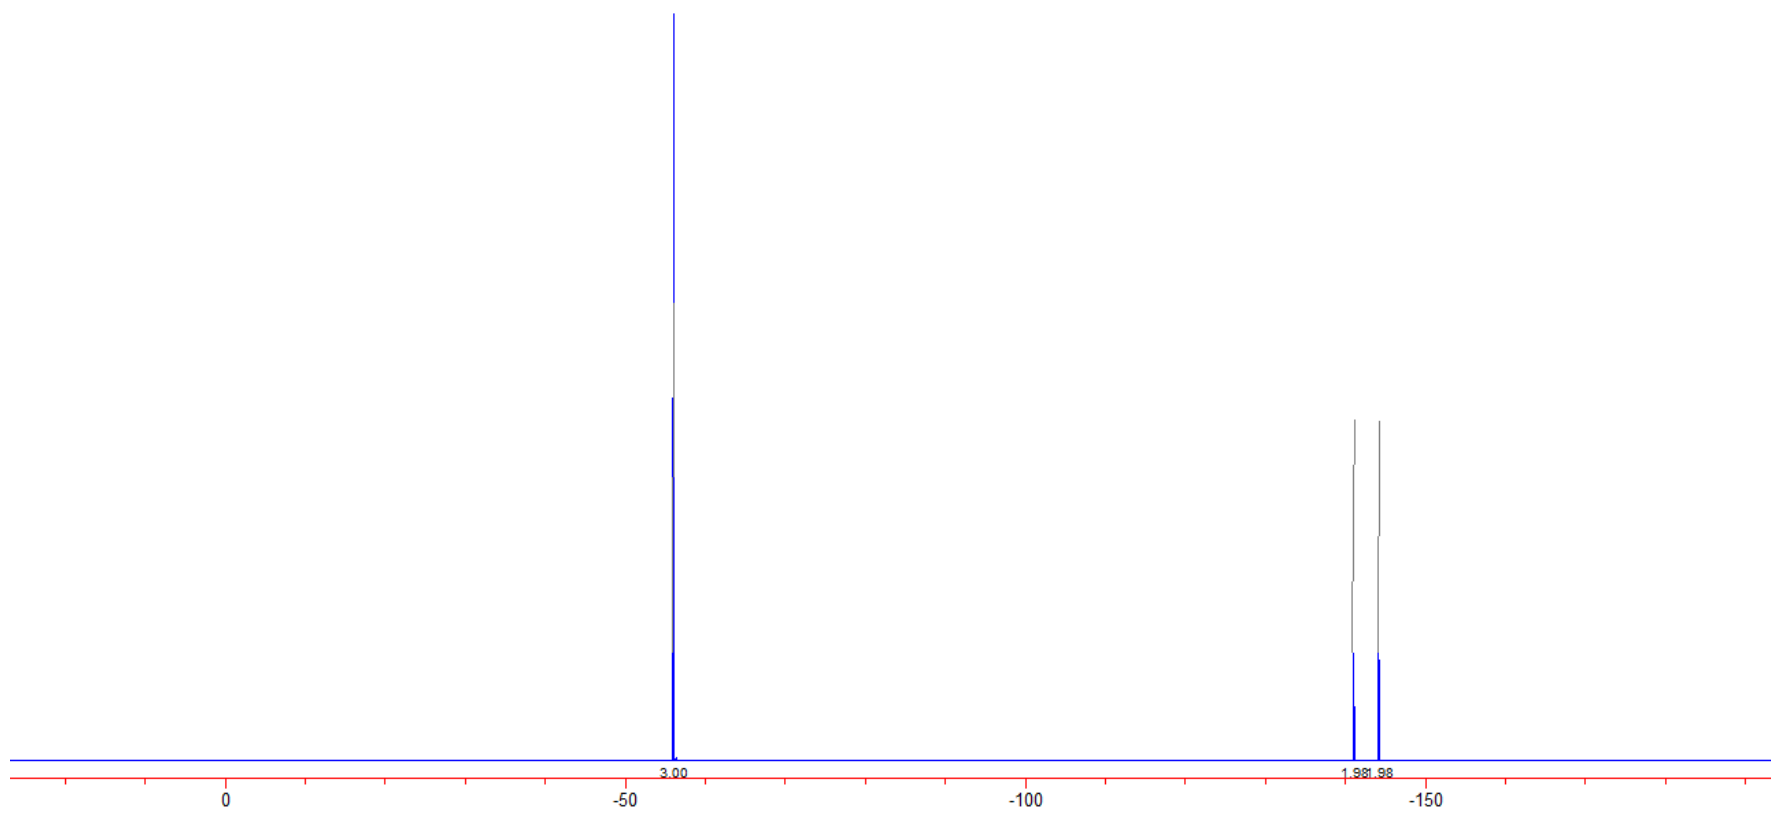

<sup>19</sup>F NMR Spectrum in CDCl<sub>3</sub>

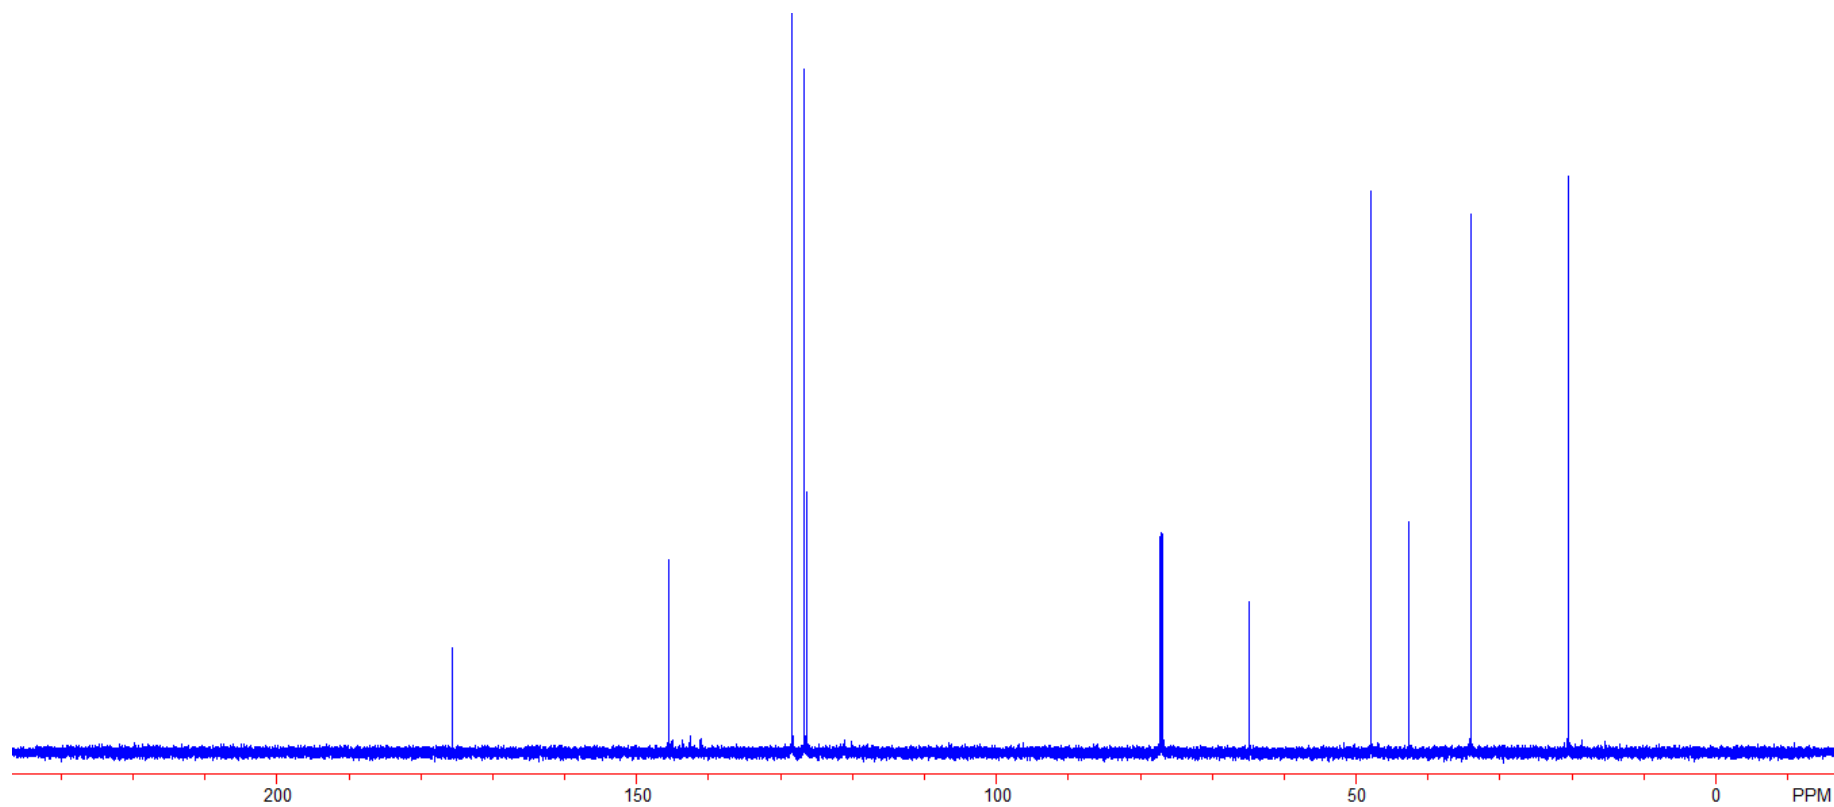

<sup>13</sup>C NMR Spectrum in CDCl<sub>3</sub>

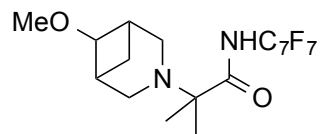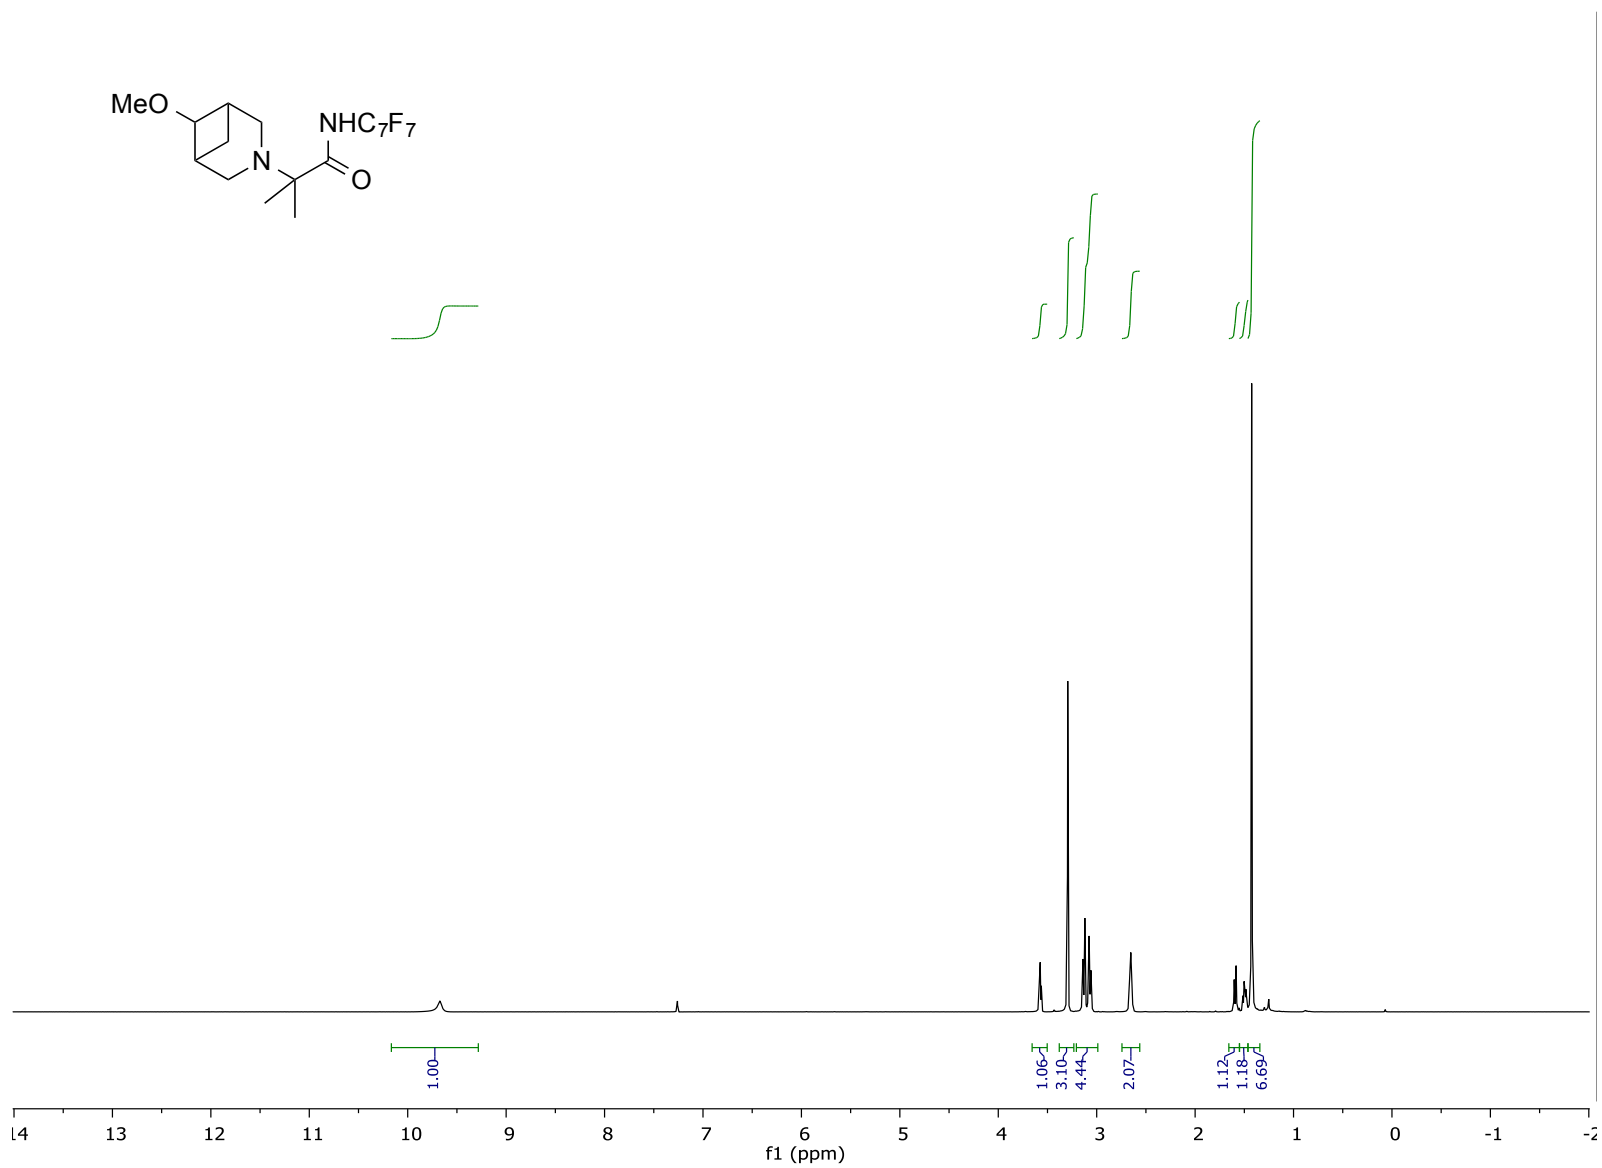

<sup>1</sup>H NMR Spectrum of **S6** in CDCl<sub>3</sub>

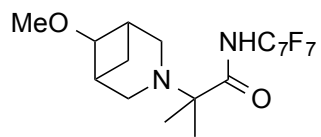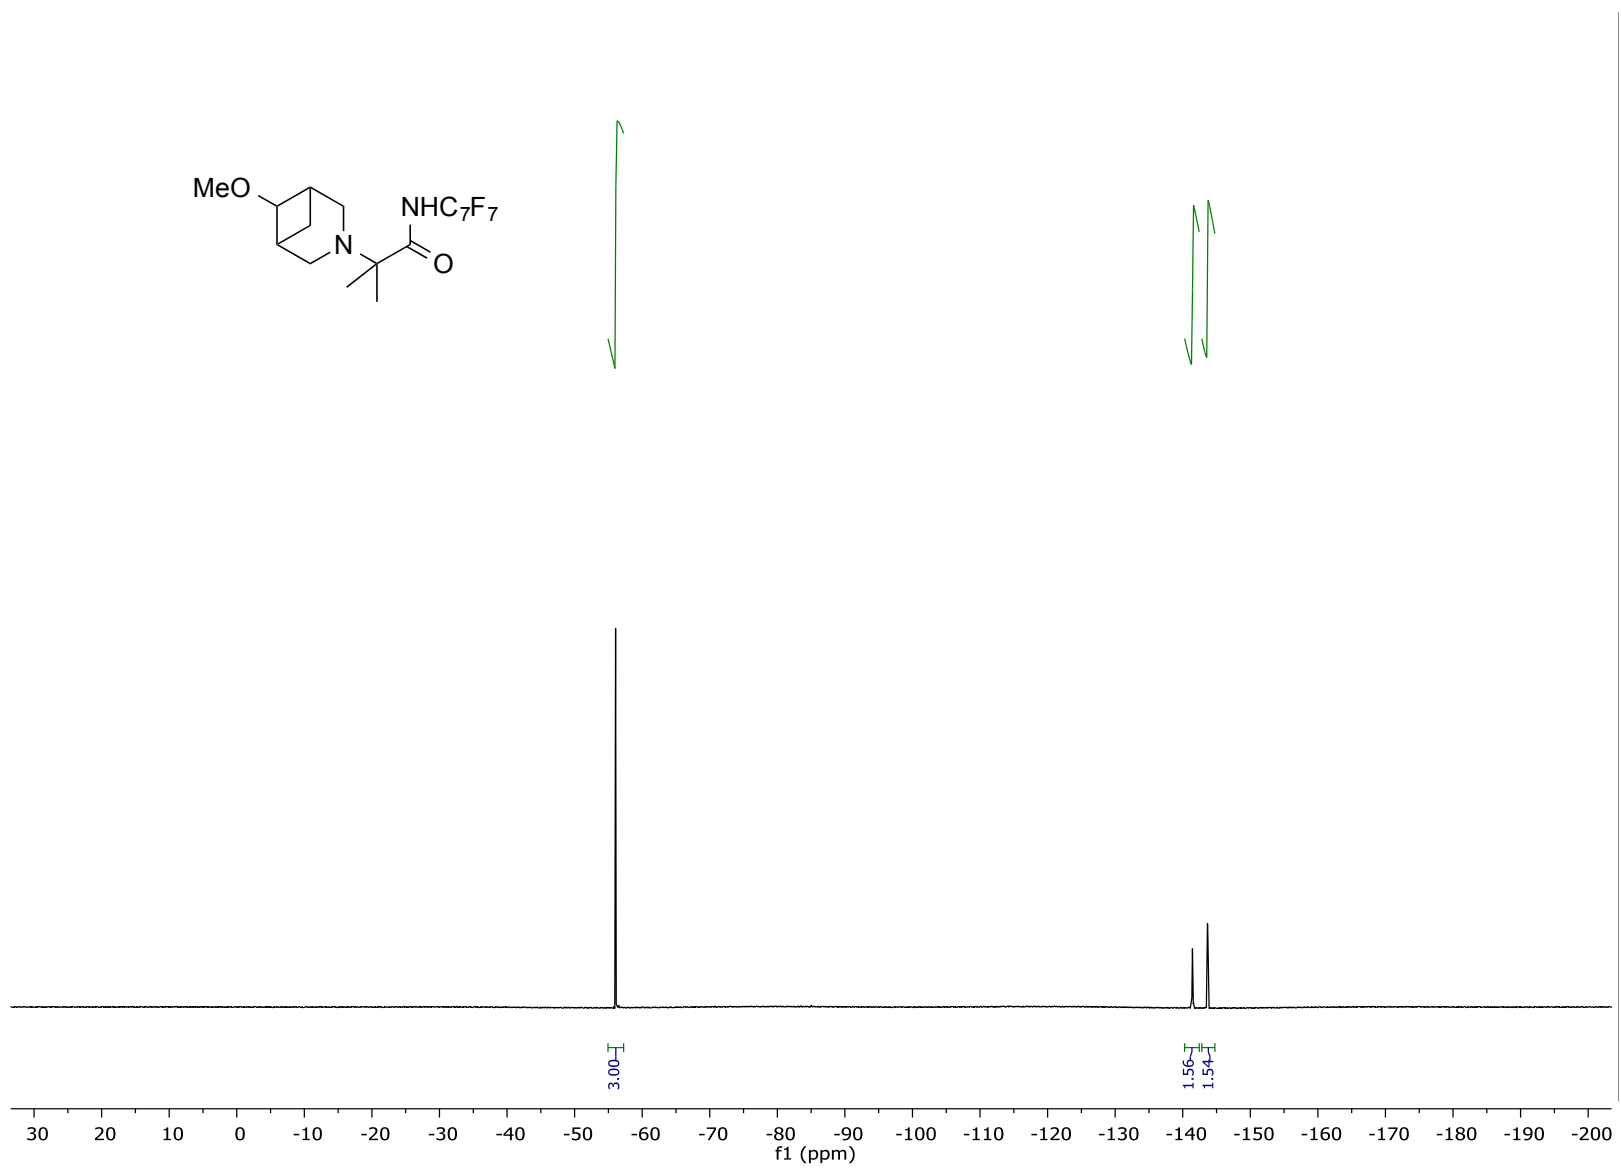

<sup>19</sup>F NMR Spectrum of S6 in CDCl<sub>3</sub>



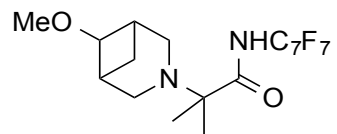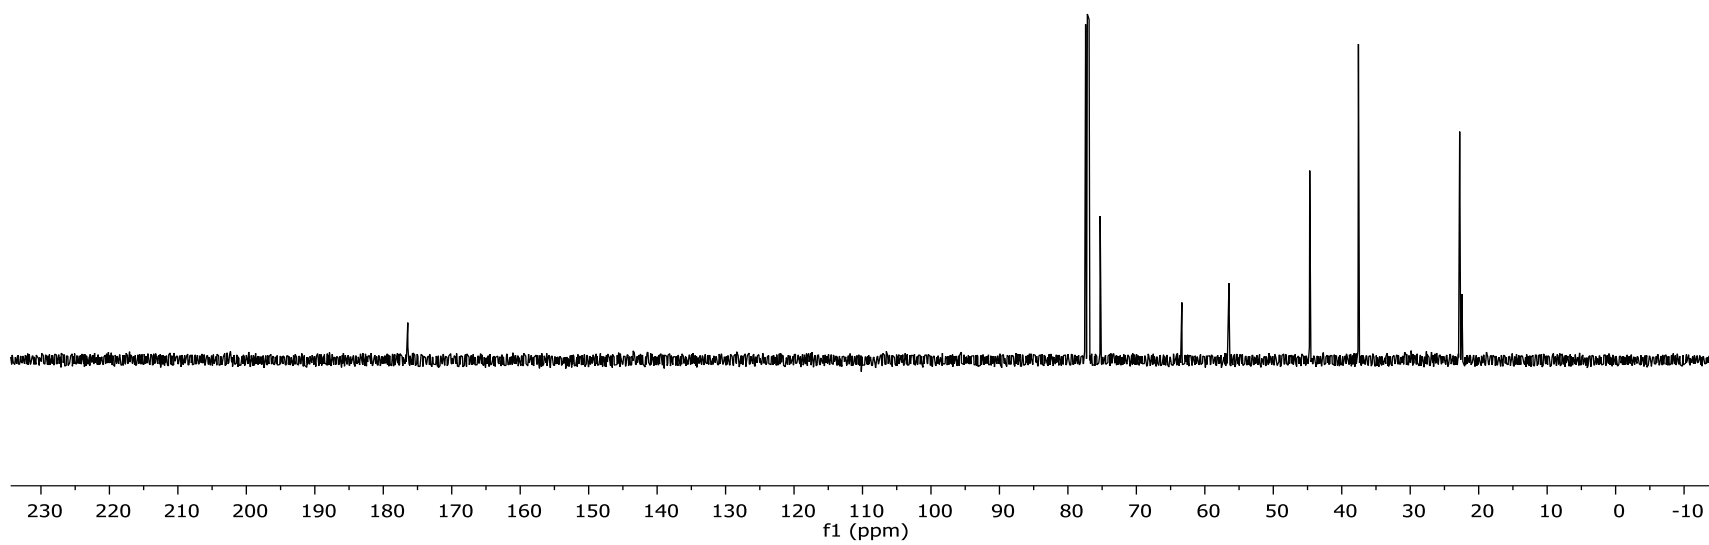

<sup>13</sup>C NMR Spectrum of **S6** in CDCl<sub>3</sub>

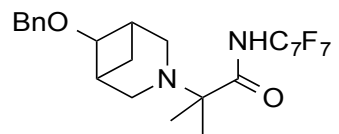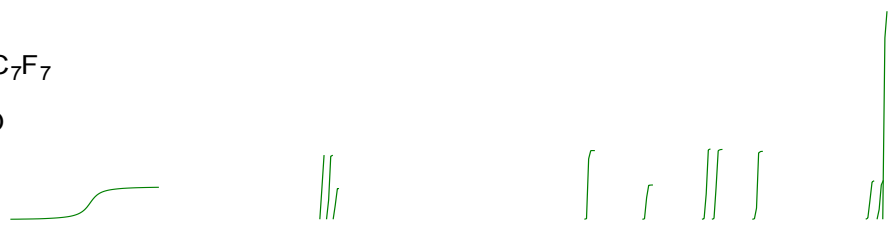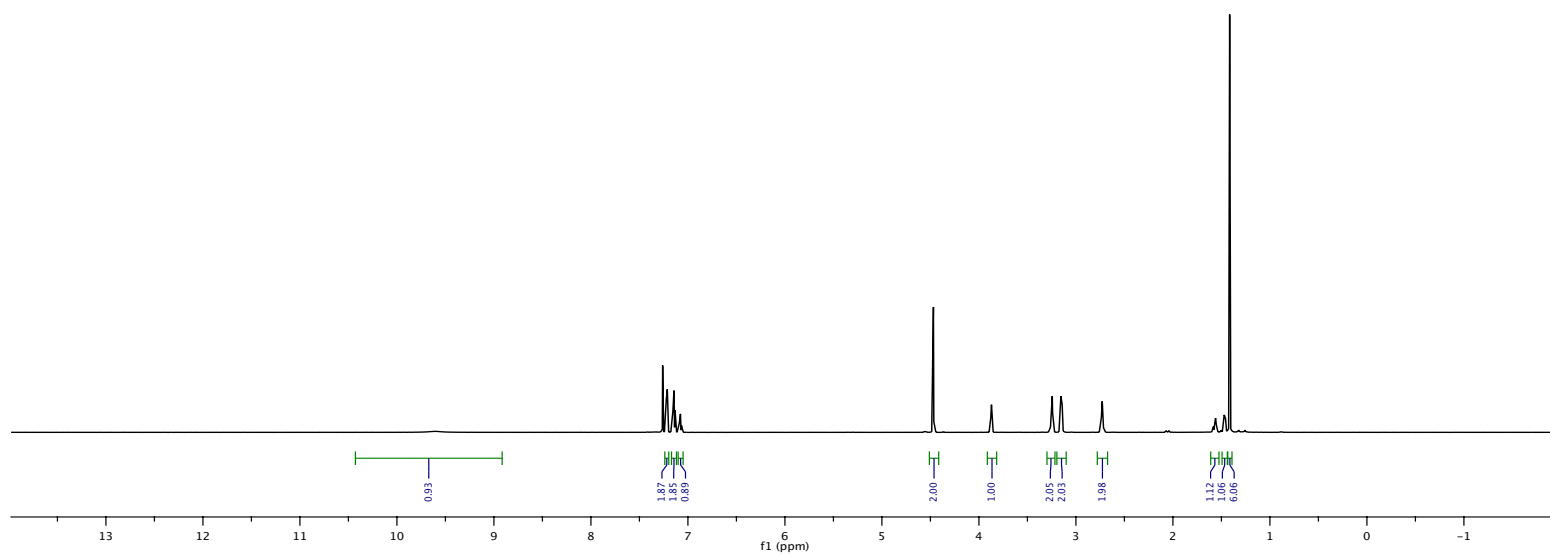

<sup>1</sup>H NMR Spectrum of S7 in CDCl<sub>3</sub>

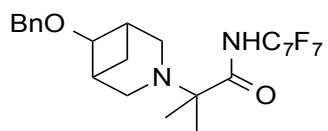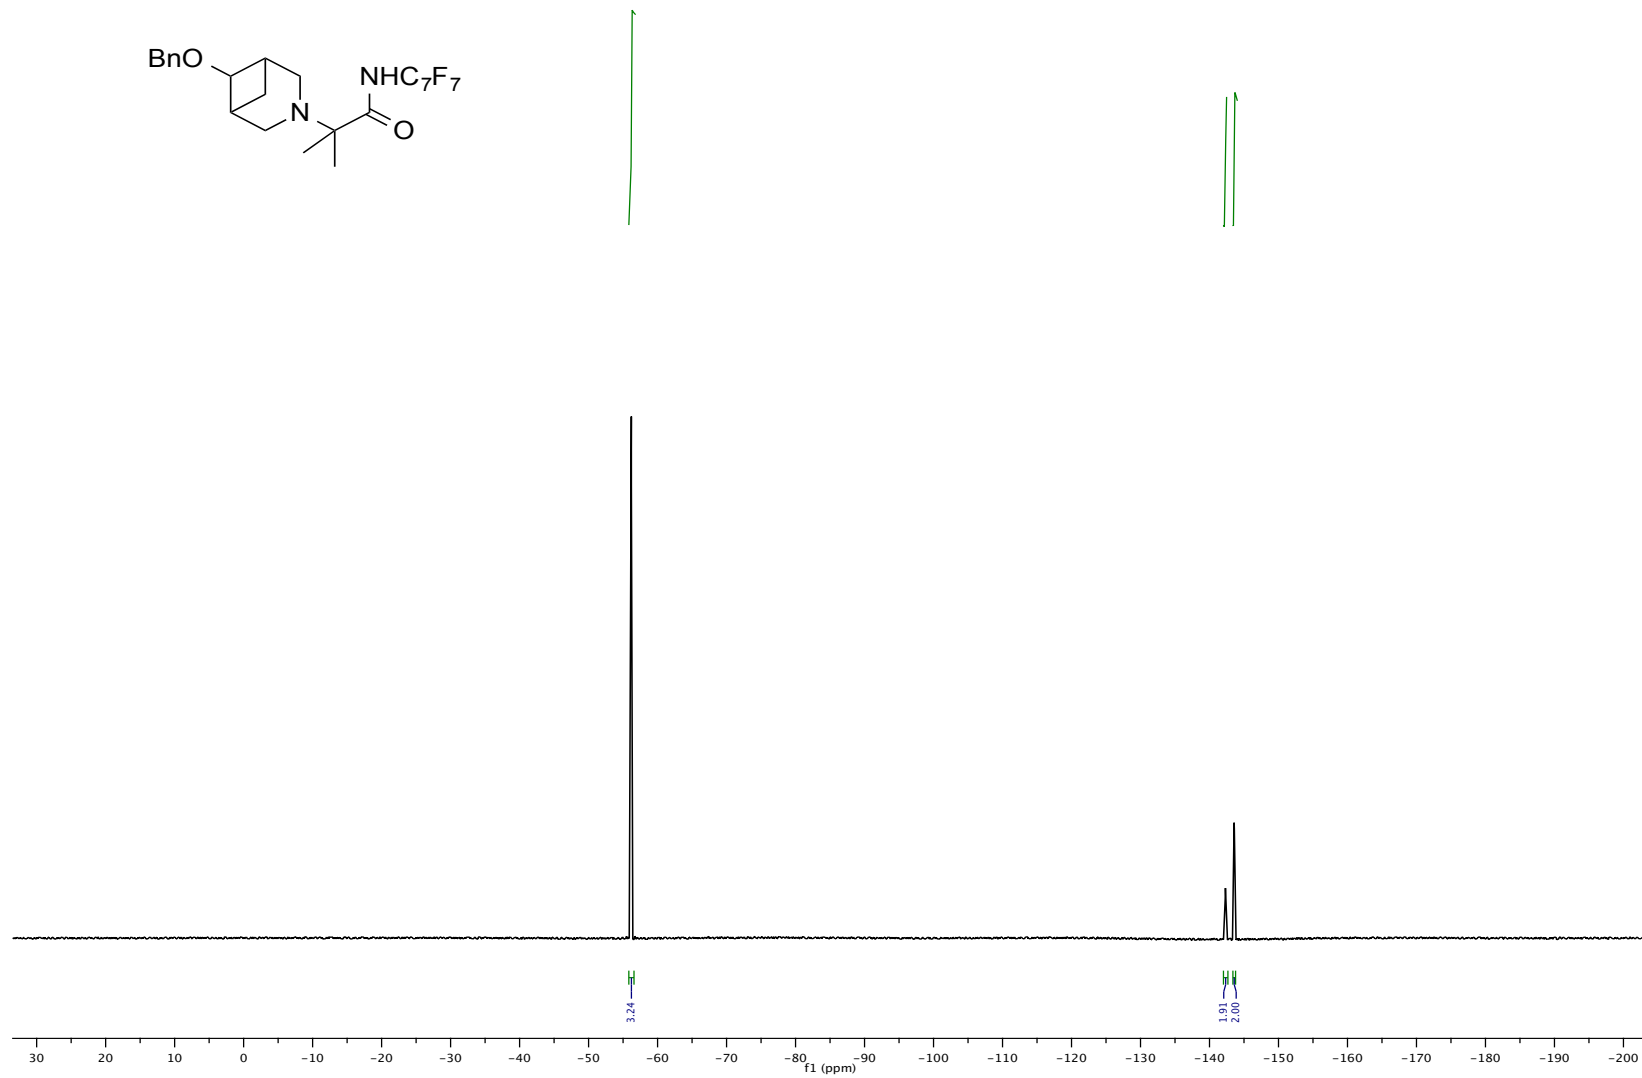

<sup>19</sup>F NMR Spectrum of **S7** in CDCl<sub>3</sub>

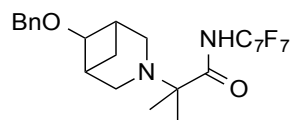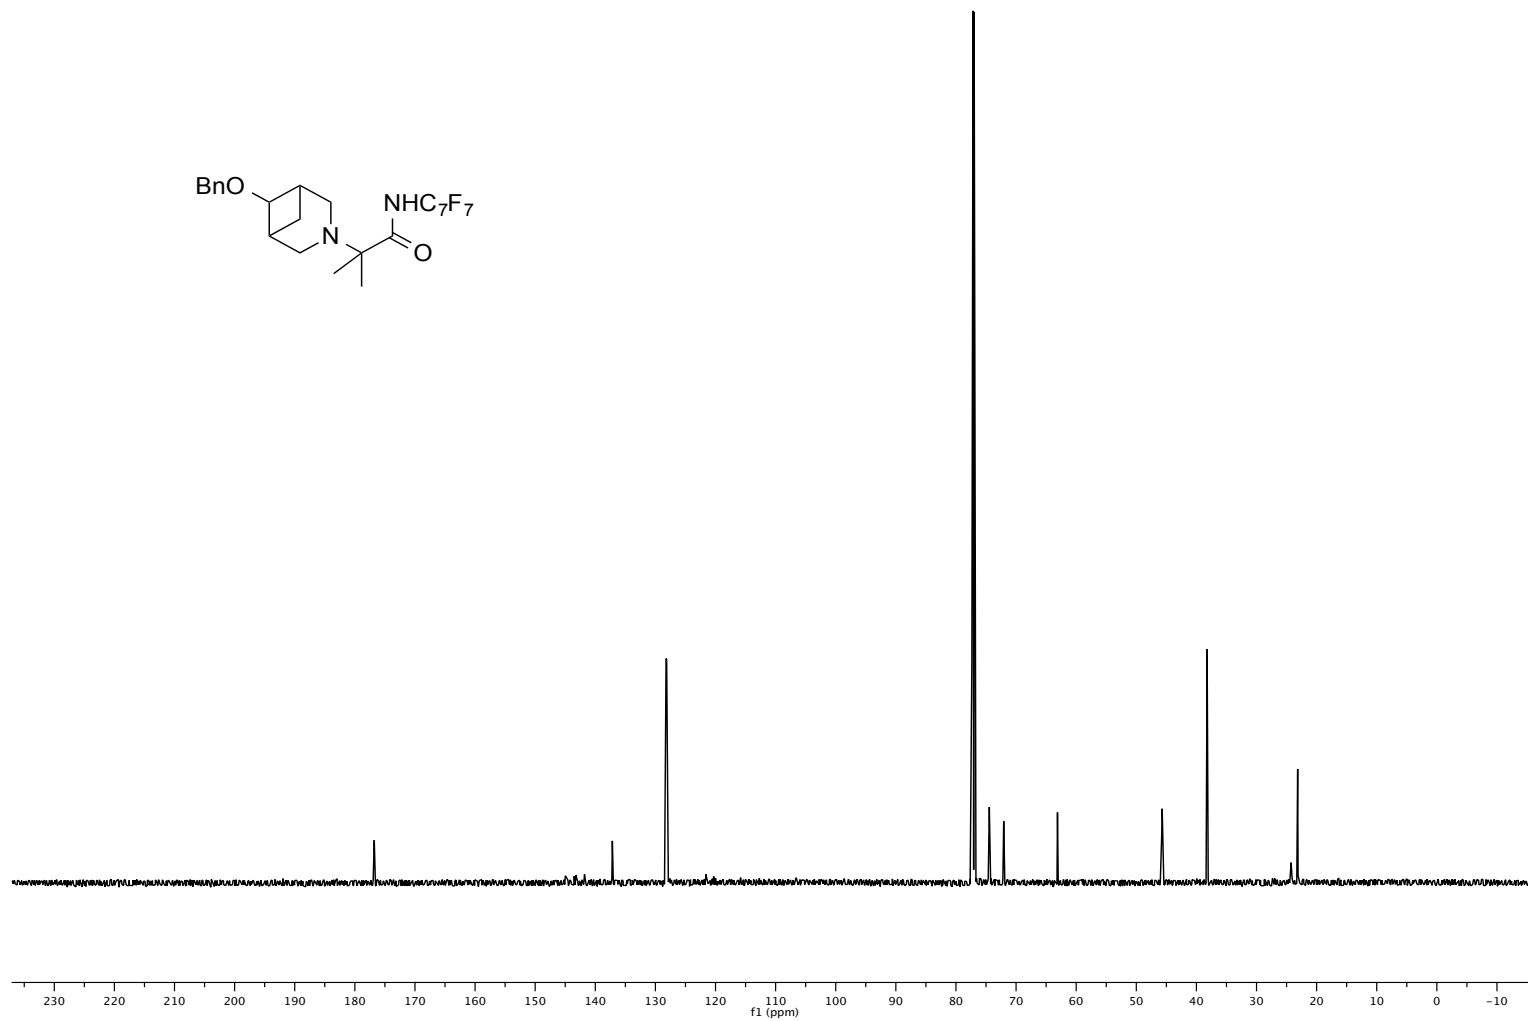

$^{13}\text{C}$  NMR Spectrum of **S7** in  $\text{CDCl}_3$

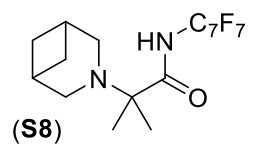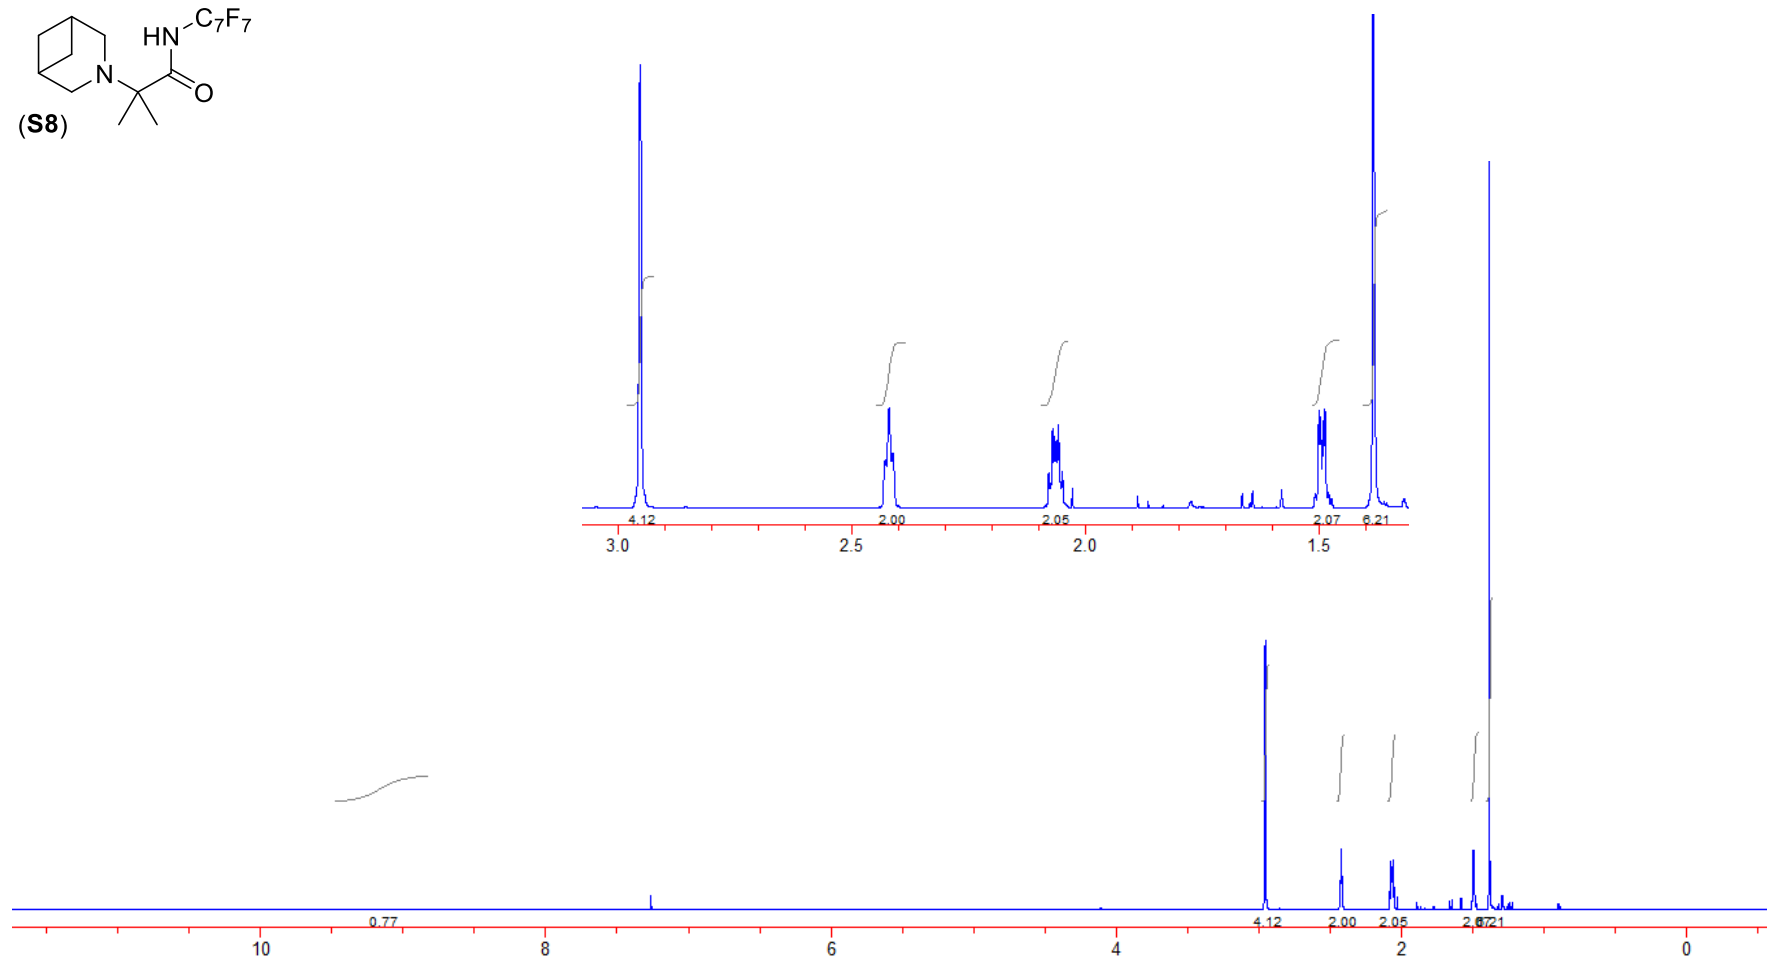

$^1\text{H}$  NMR Spectrum in  $\text{CDCl}_3$

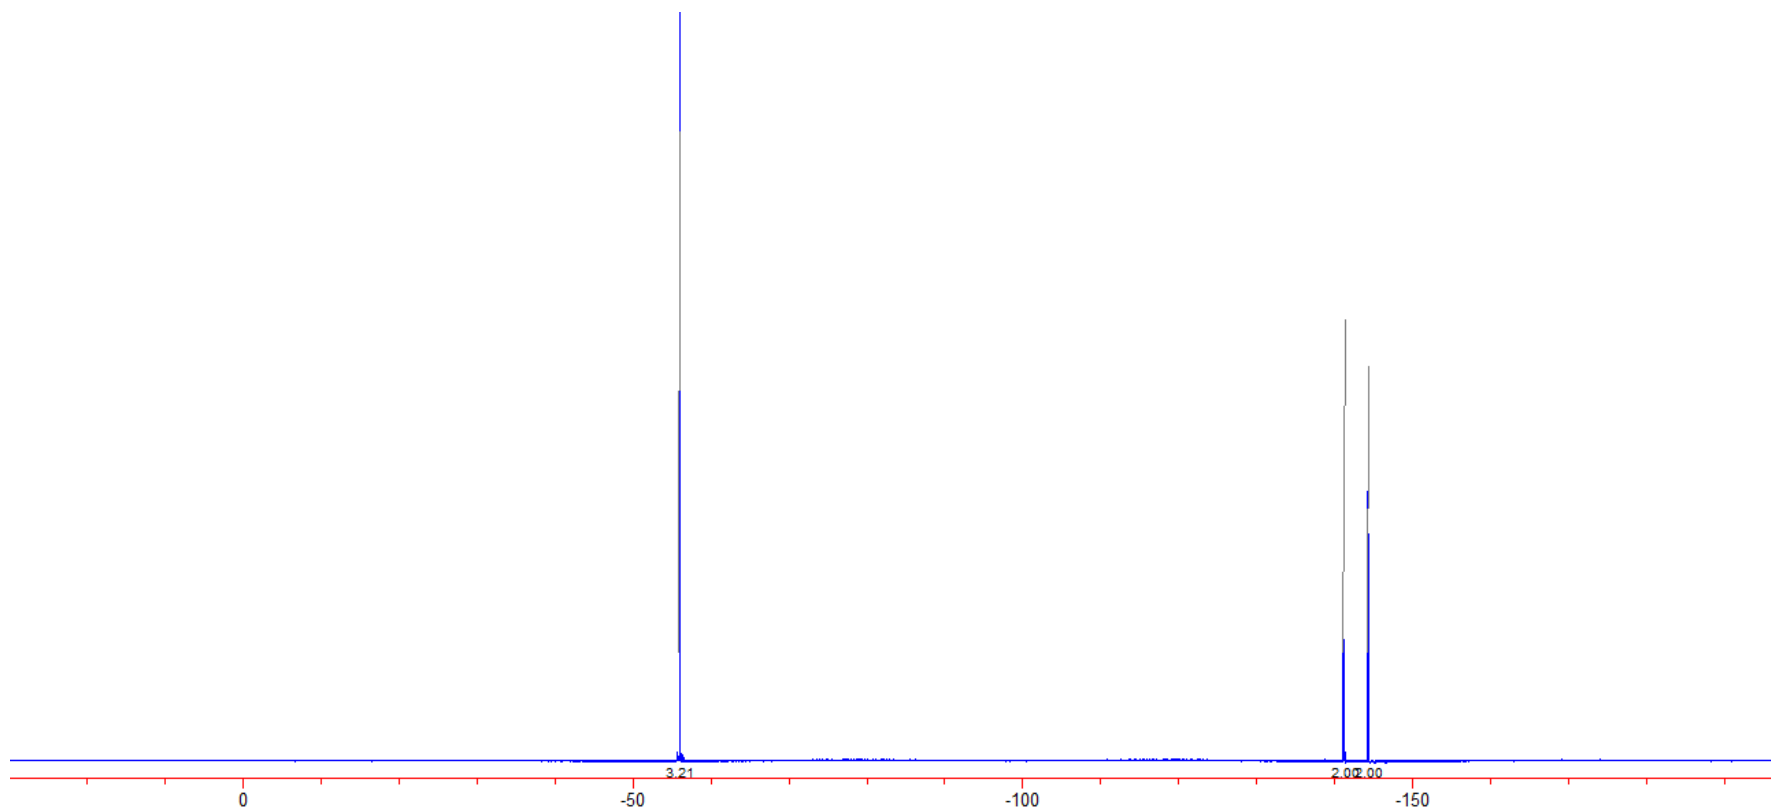

<sup>19</sup>F NMR Spectrum in CDCl<sub>3</sub>

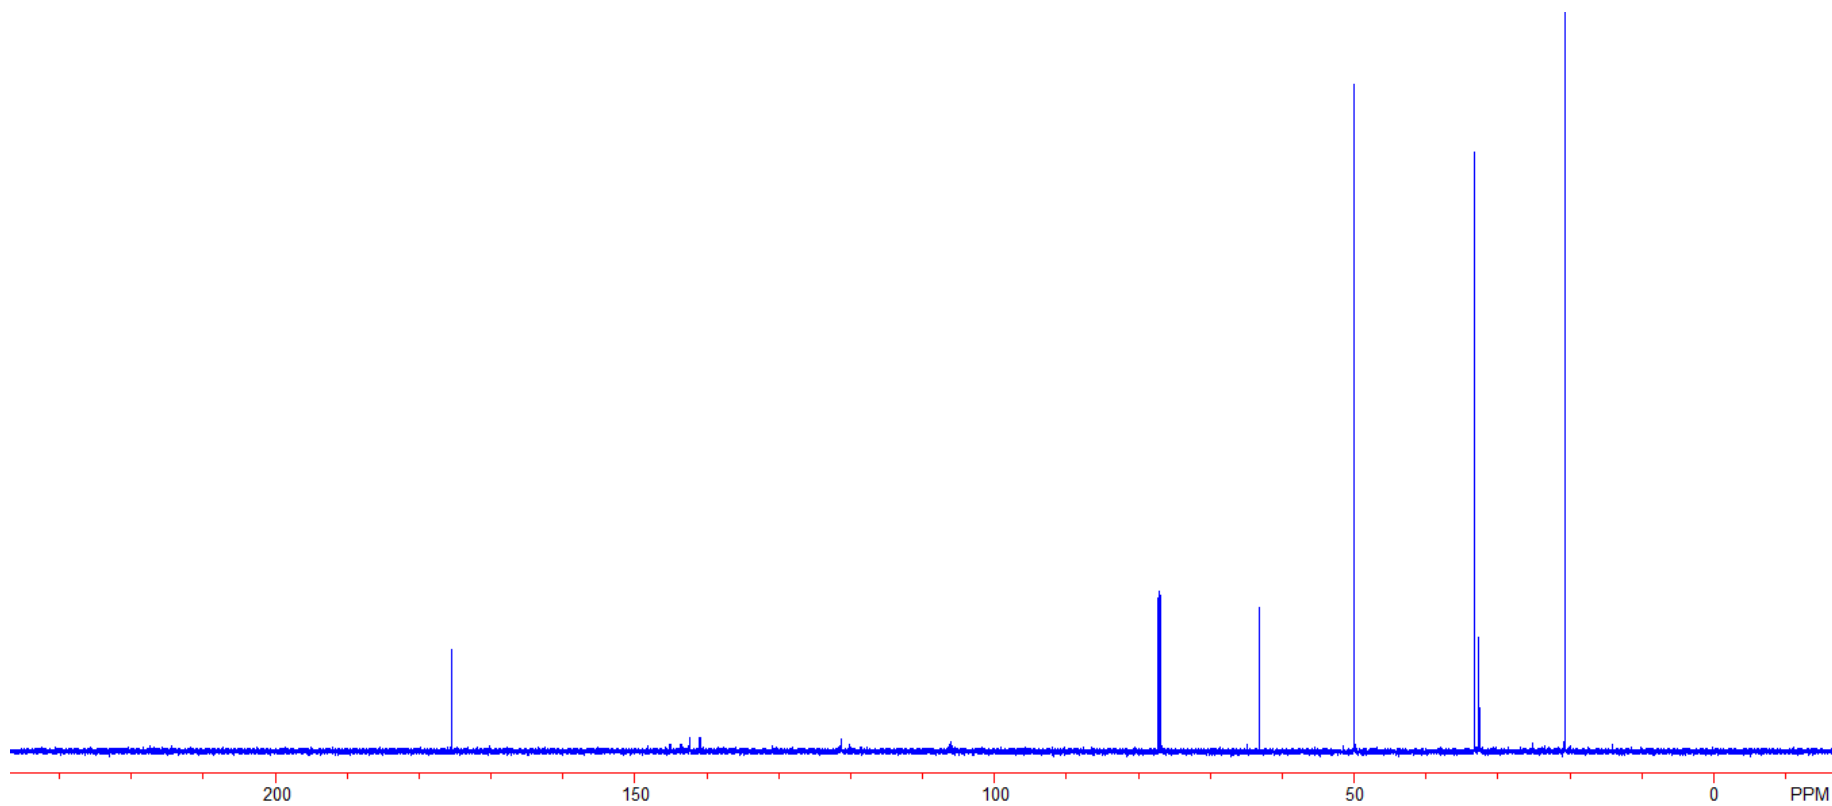

$^{13}\text{C}$  NMR Spectrum in  $\text{CDCl}_3$

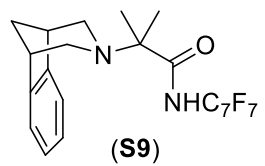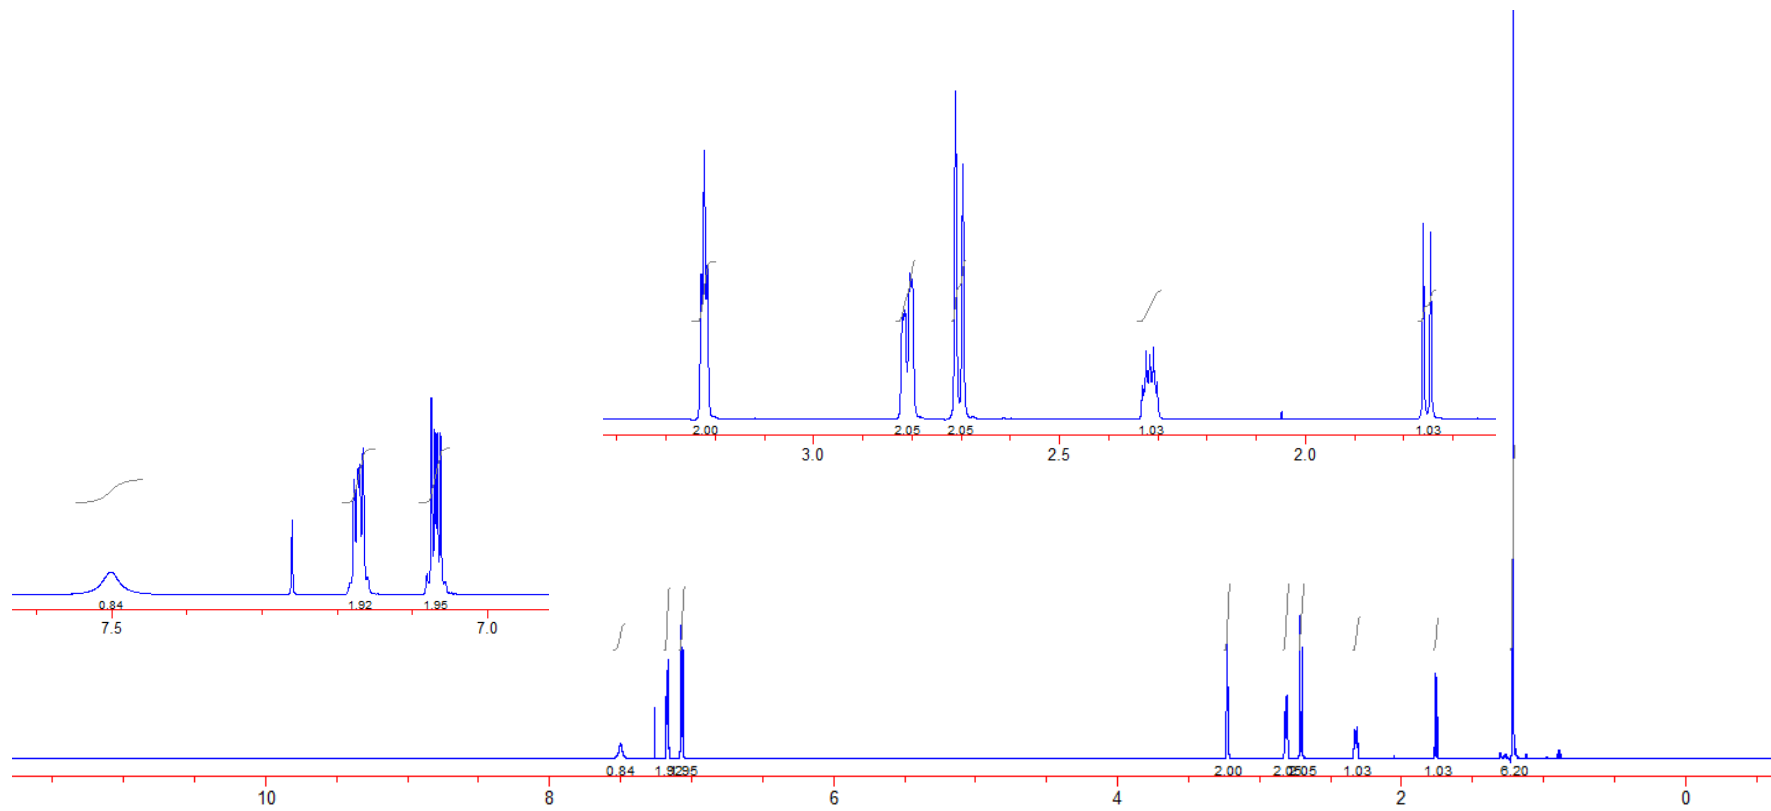

$^1\text{H}$  NMR Spectrum in  $\text{CDCl}_3$



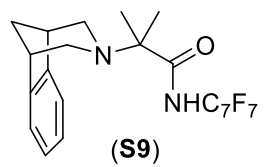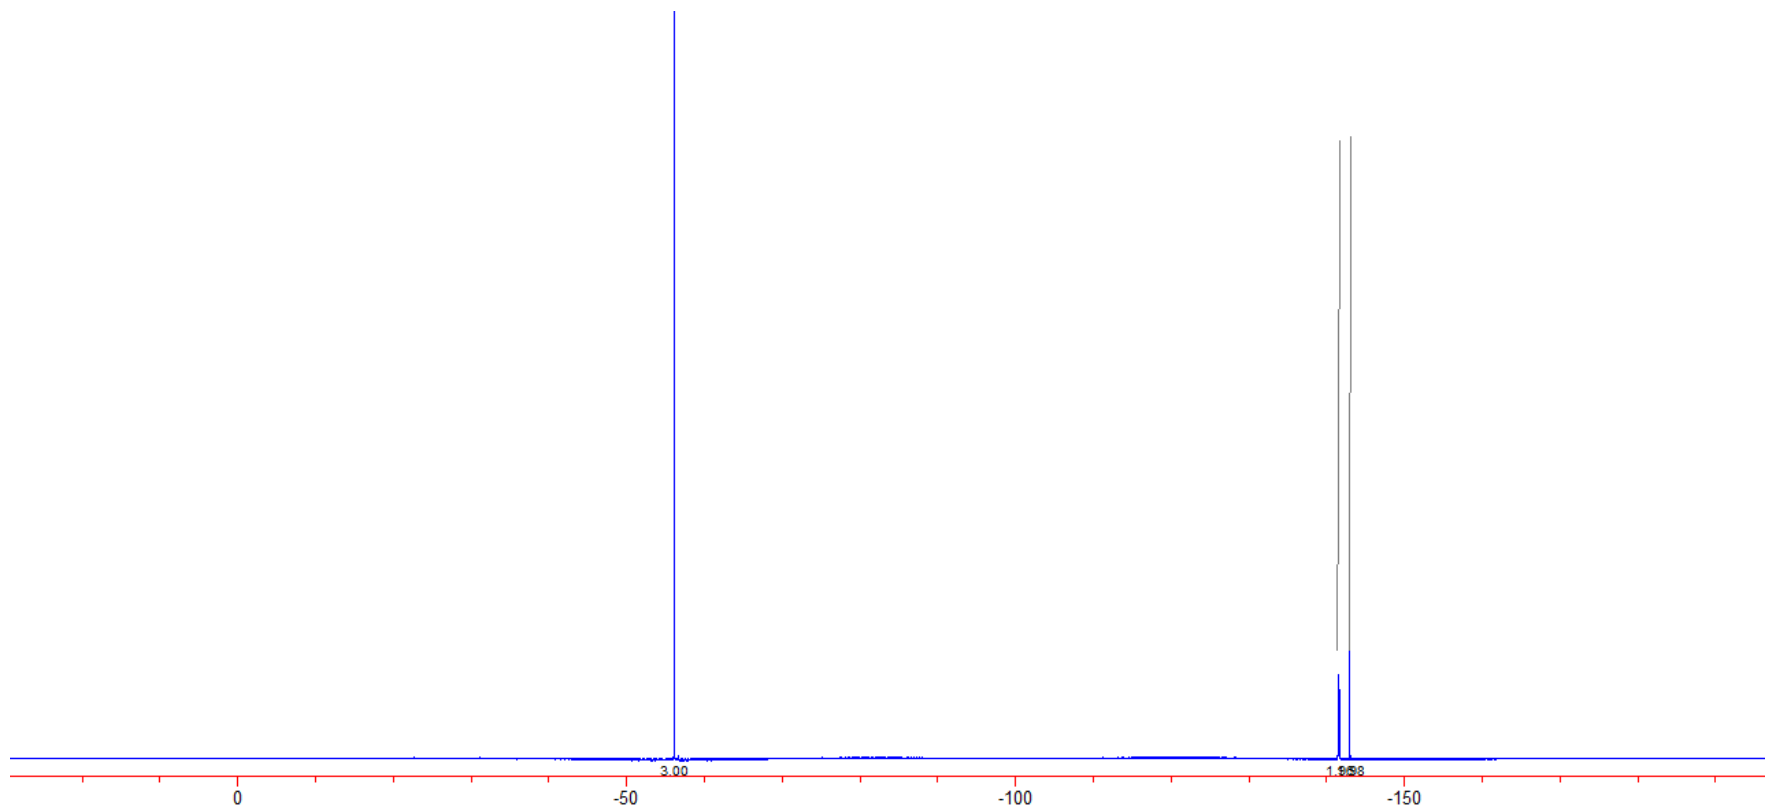

$^{19}\text{F}$  NMR Spectrum in  $\text{CDCl}_3$

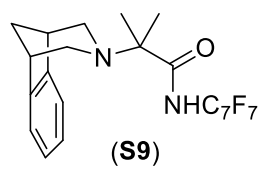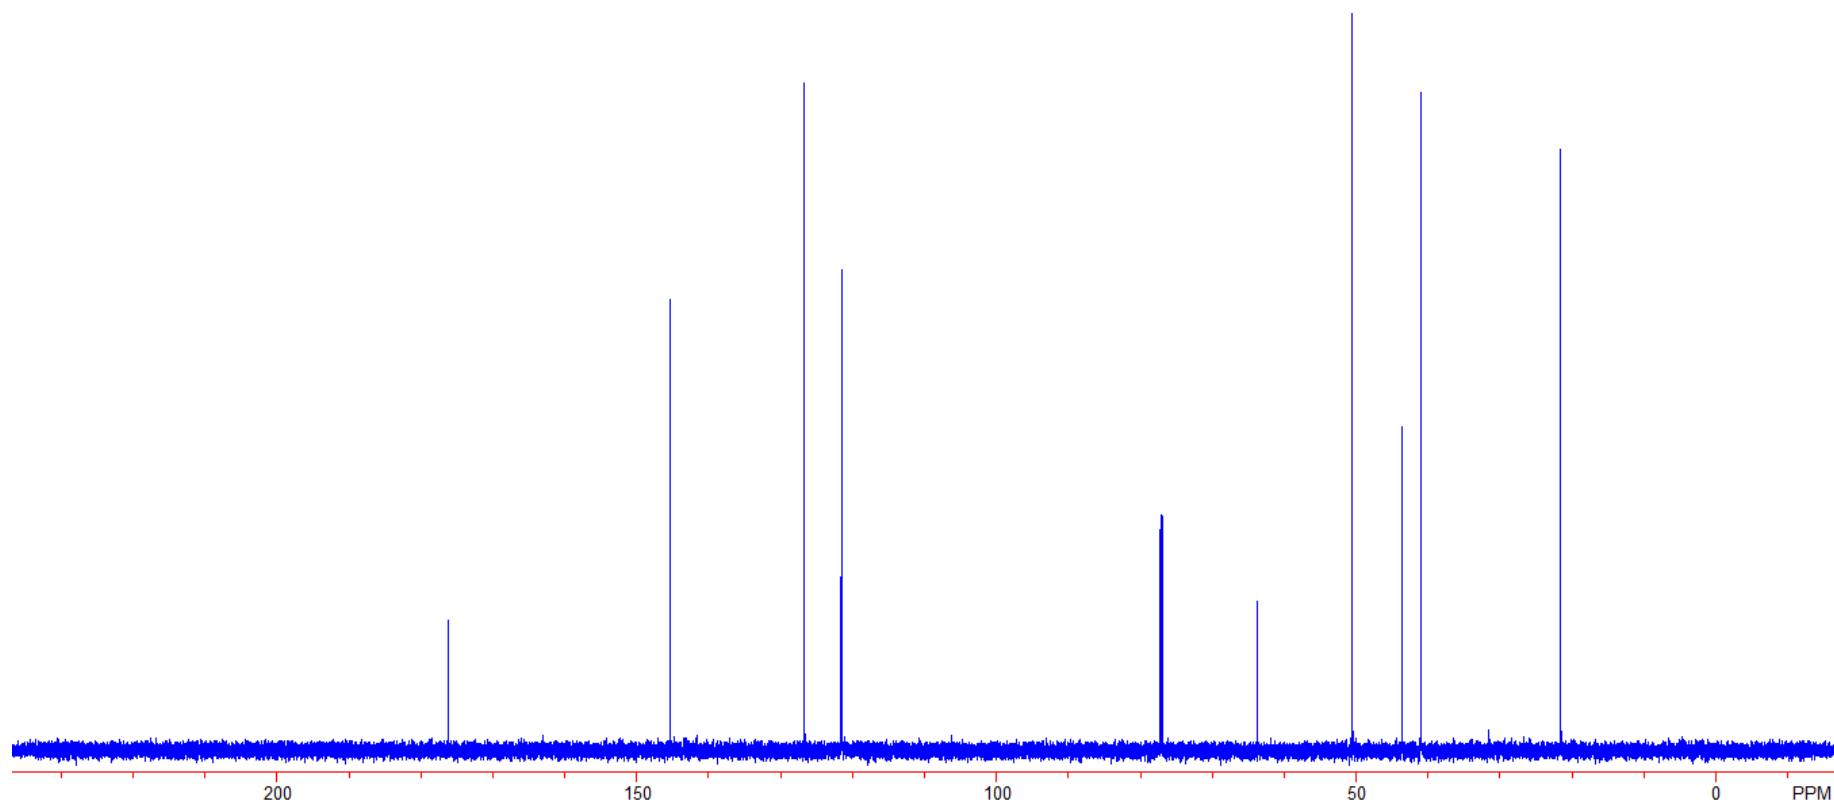

$^{13}\text{C}$  NMR Spectrum in  $\text{CDCl}_3$

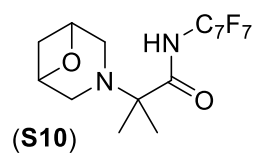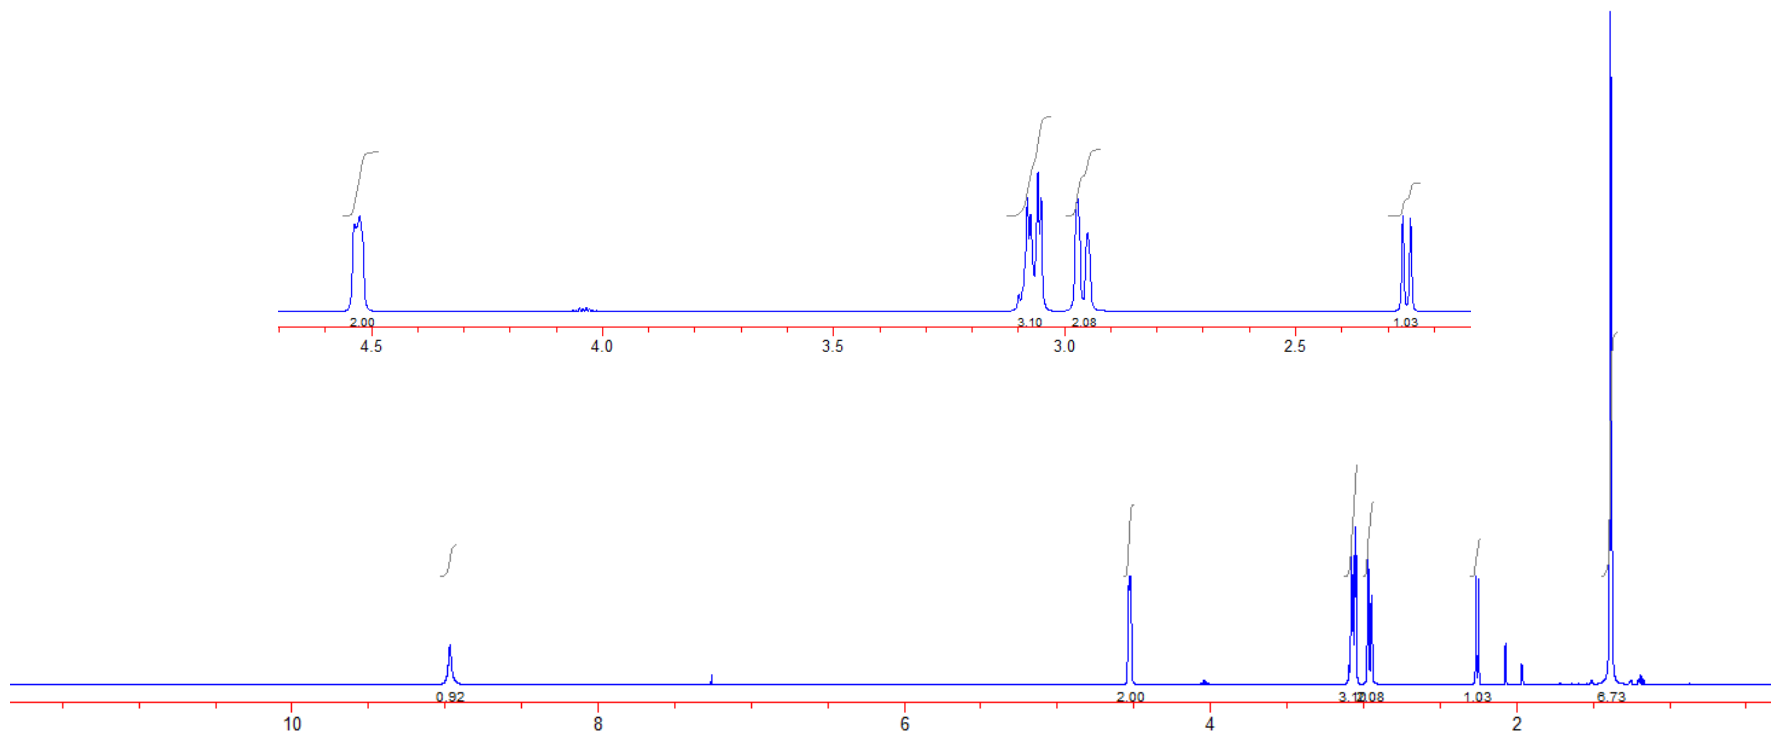

<sup>1</sup>H NMR Spectrum in CDCl<sub>3</sub>

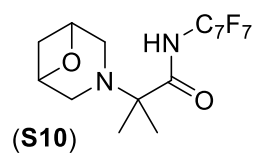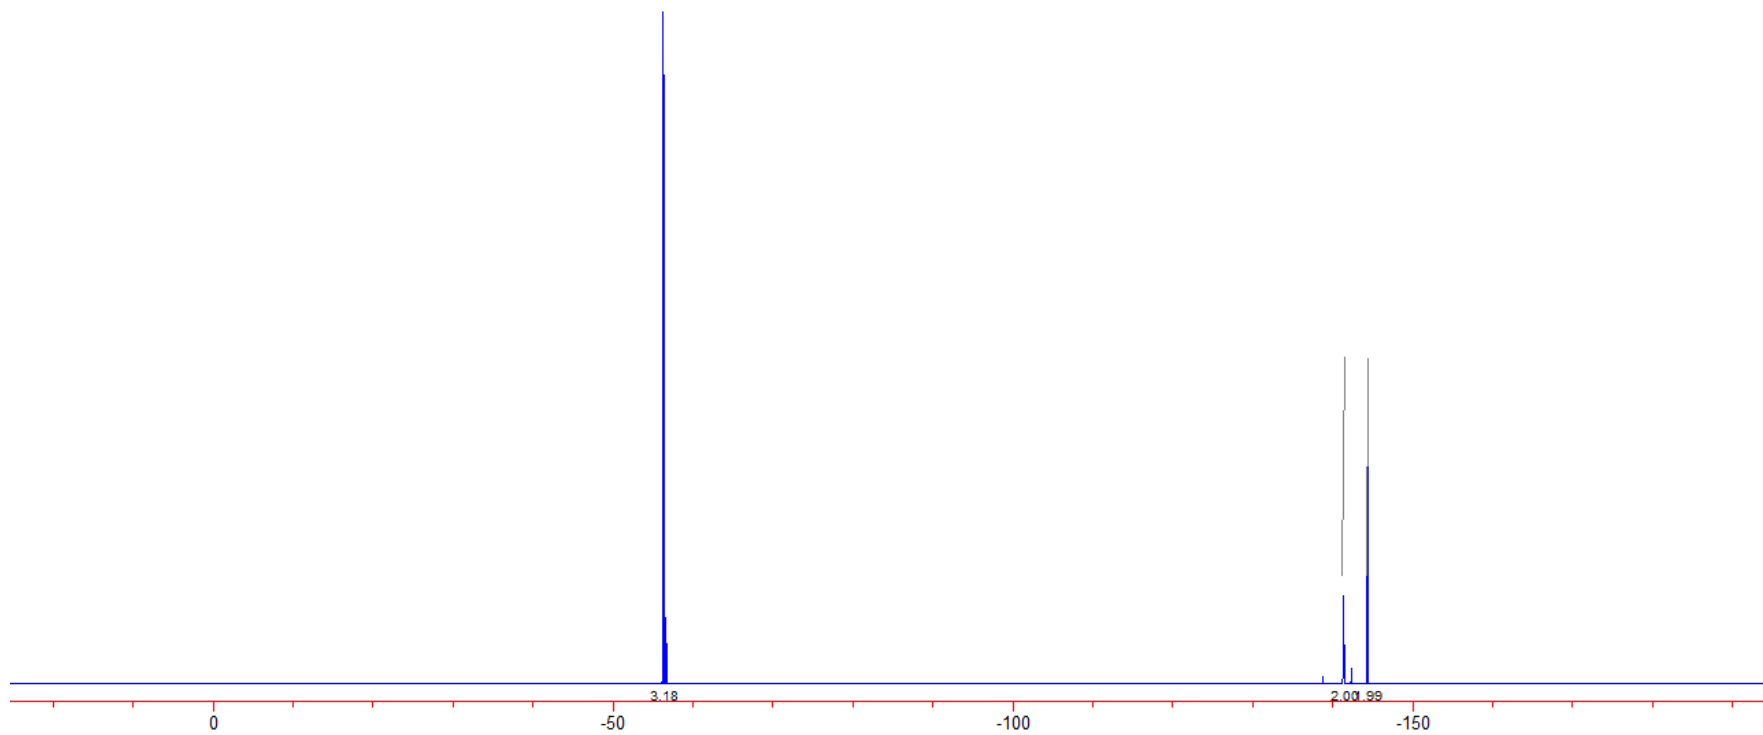

<sup>19</sup>F NMR Spectrum in CDCl<sub>3</sub>

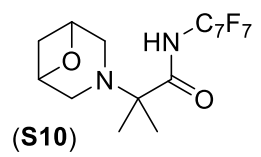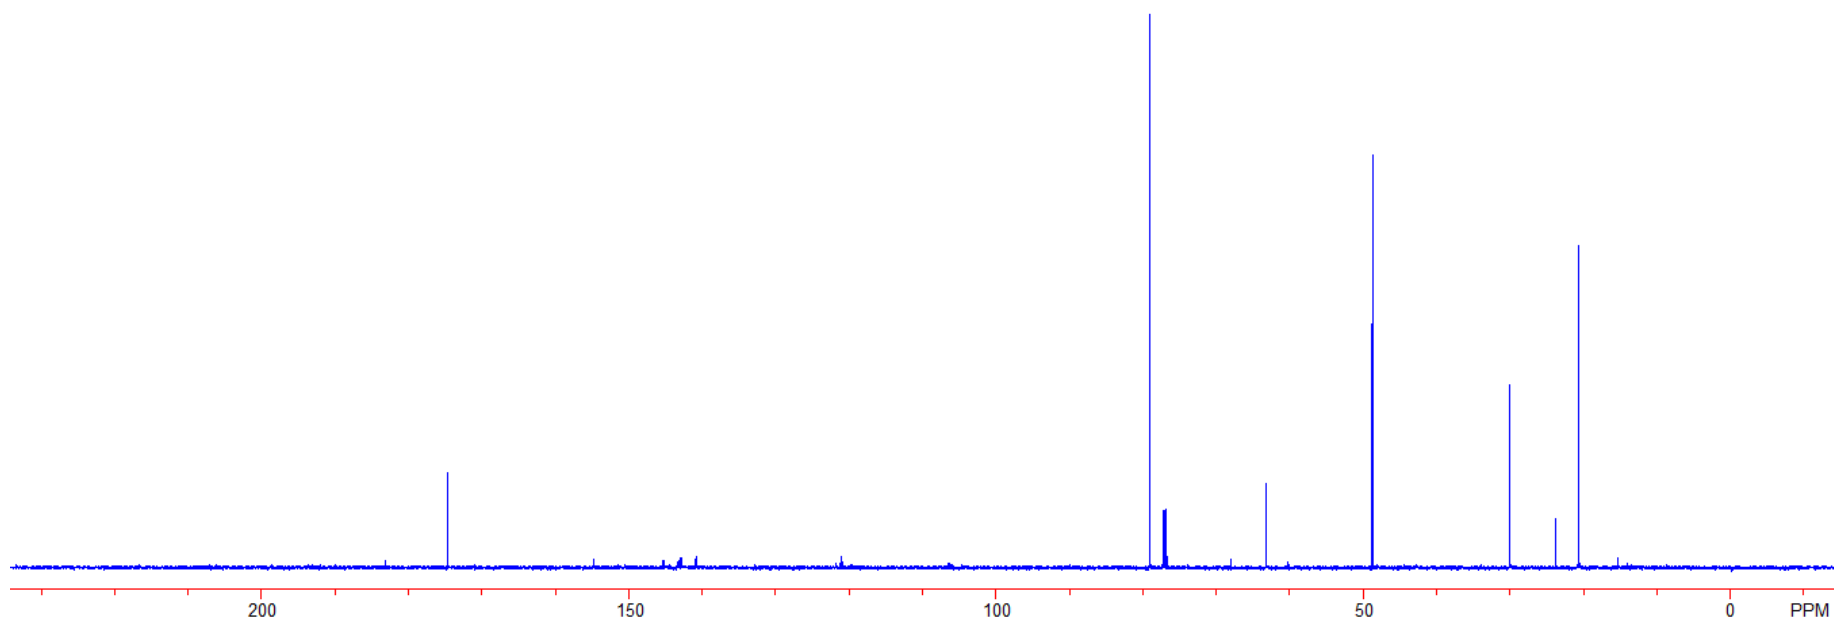

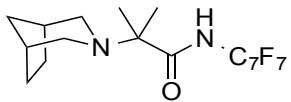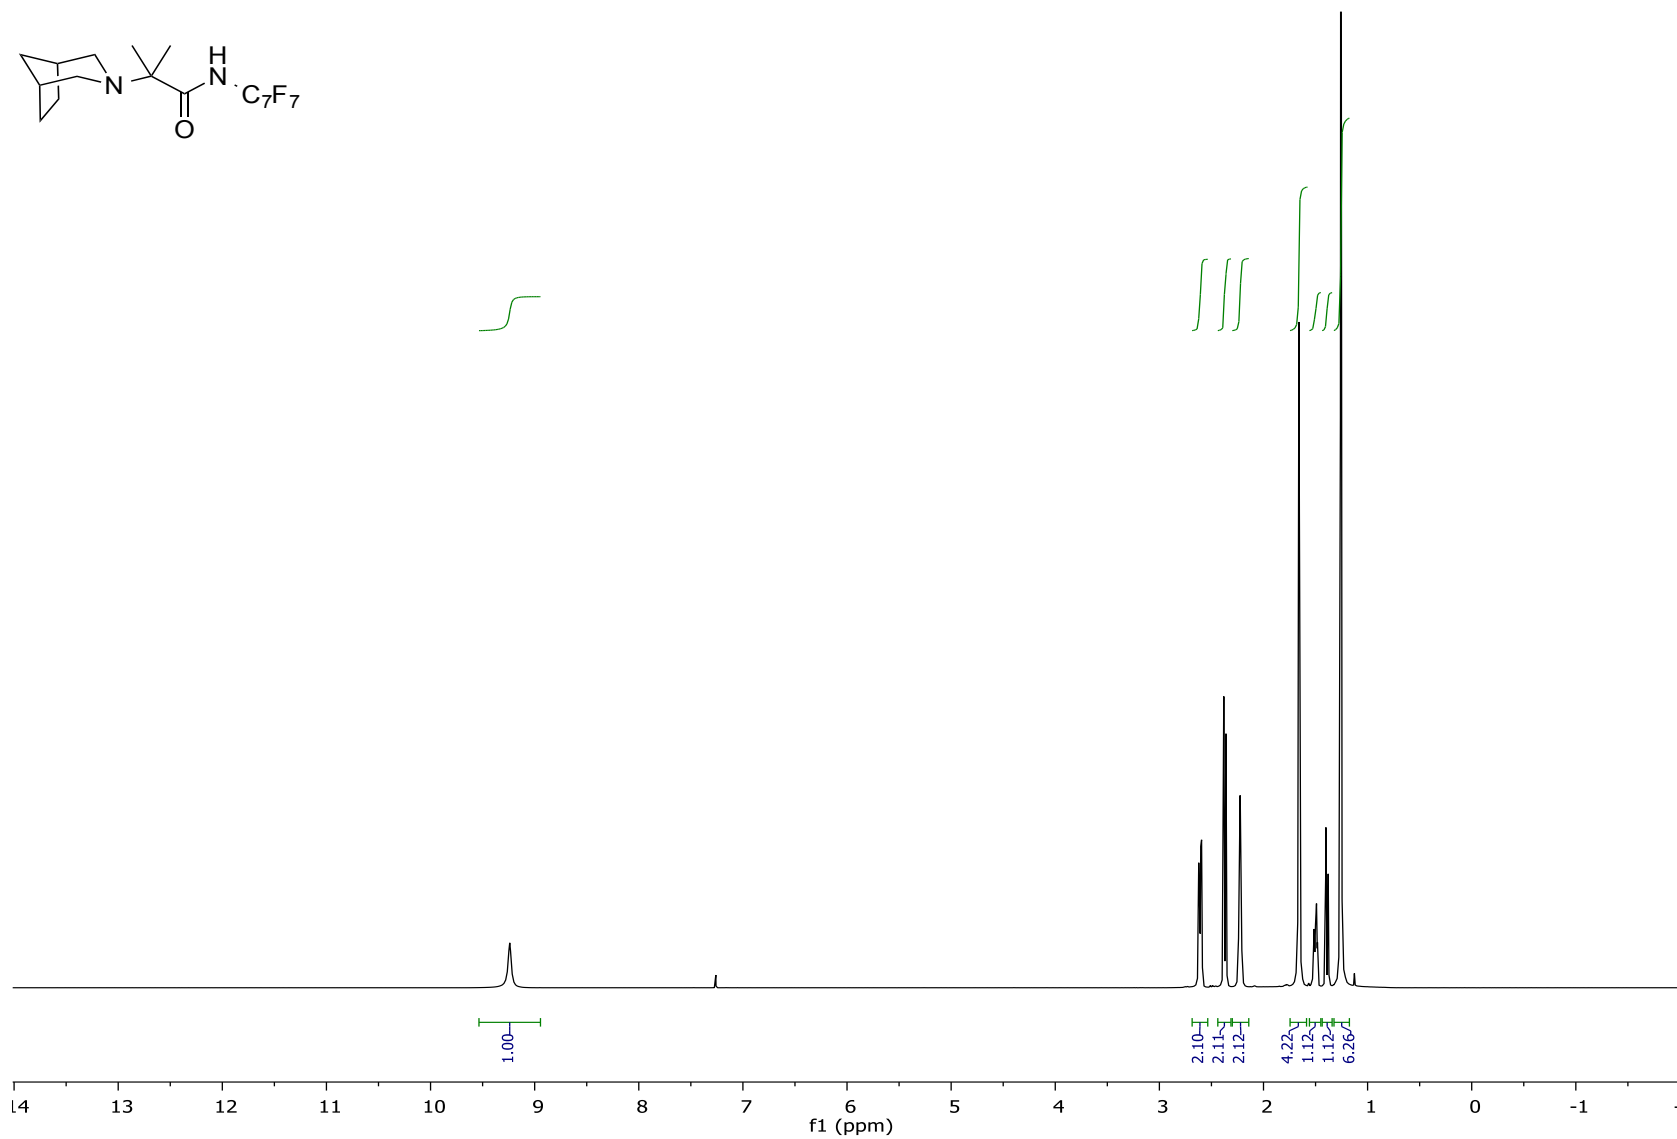

<sup>1</sup>H NMR Spectrum of S11 in CDCl<sub>3</sub>

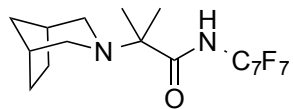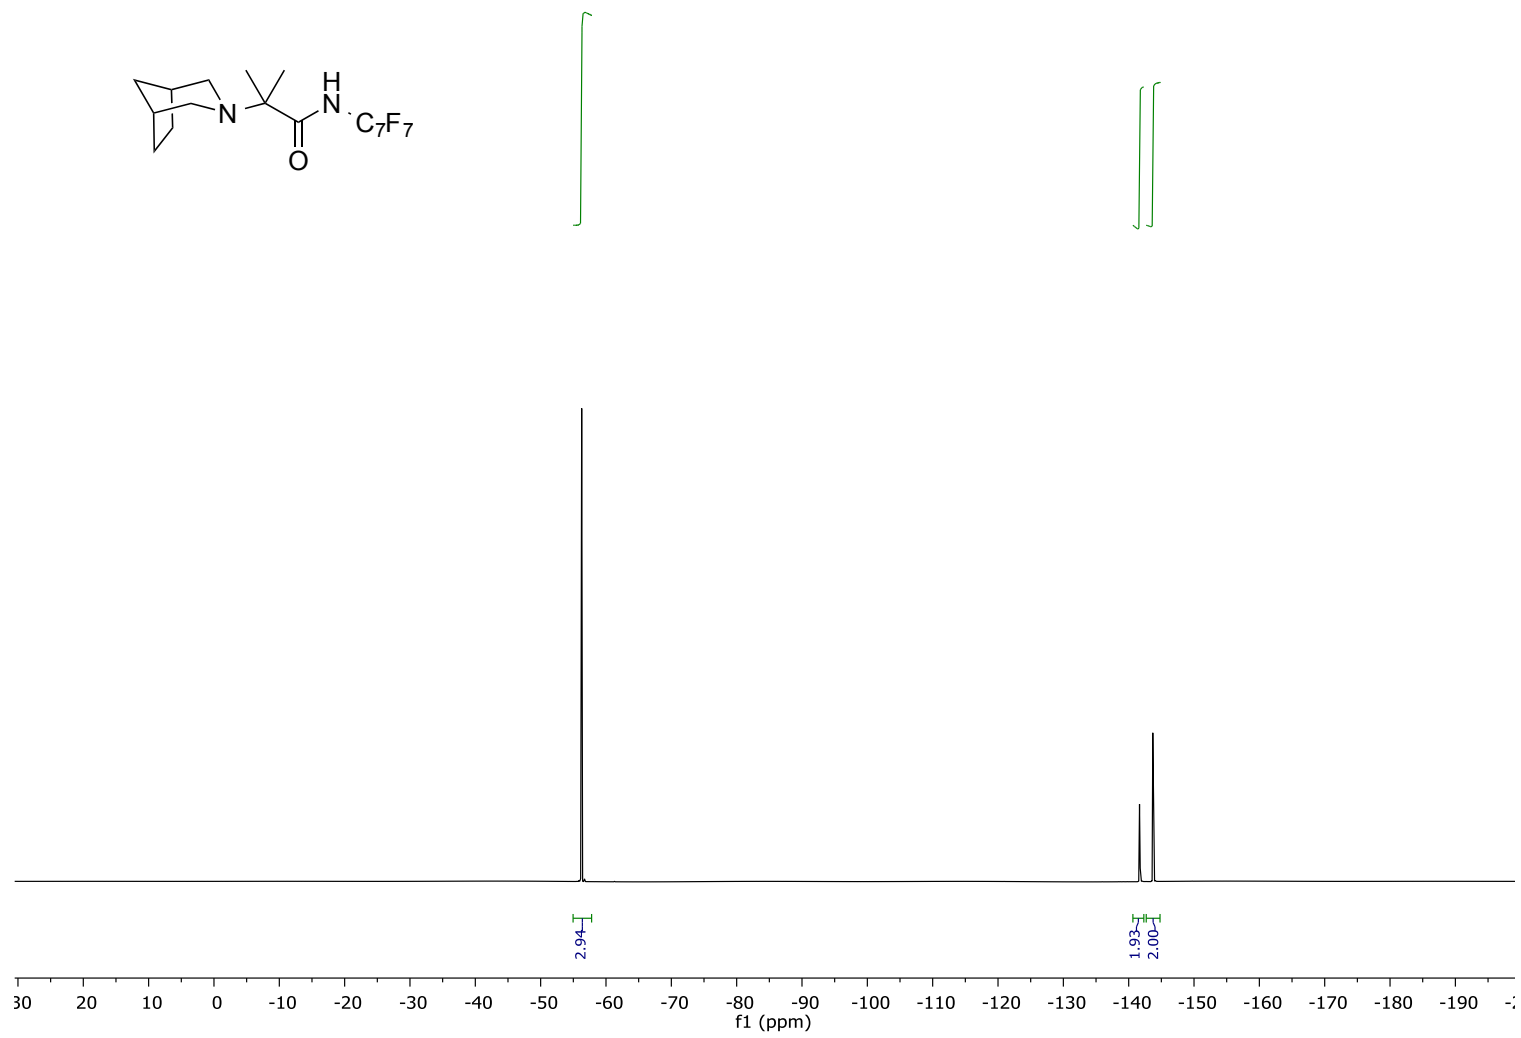

$^{19}\text{F}$  NMR Spectrum of **S11** in  $\text{CDCl}_3$

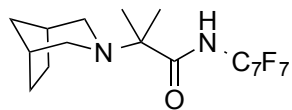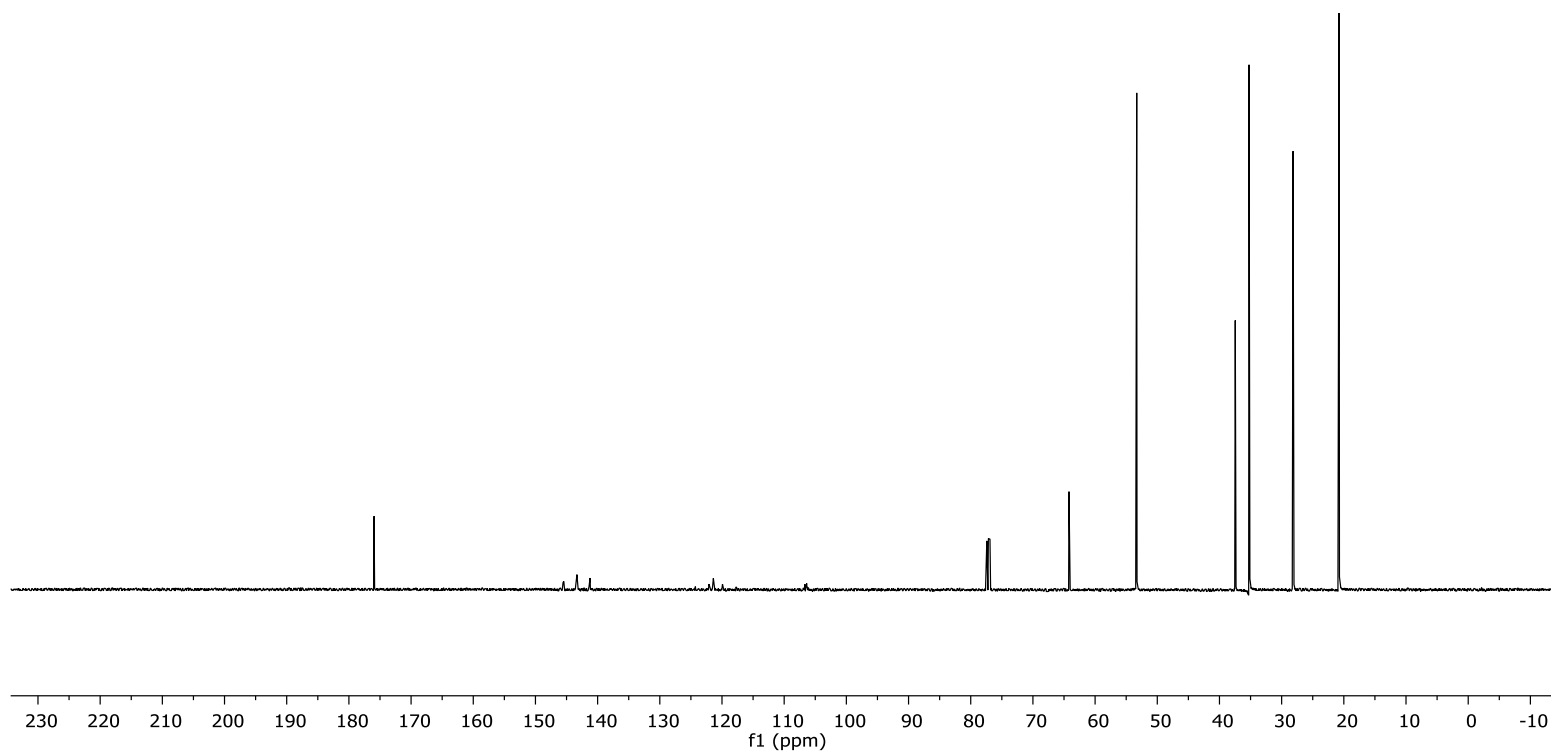

<sup>13</sup>C NMR Spectrum of **S11** in CDCl<sub>3</sub>



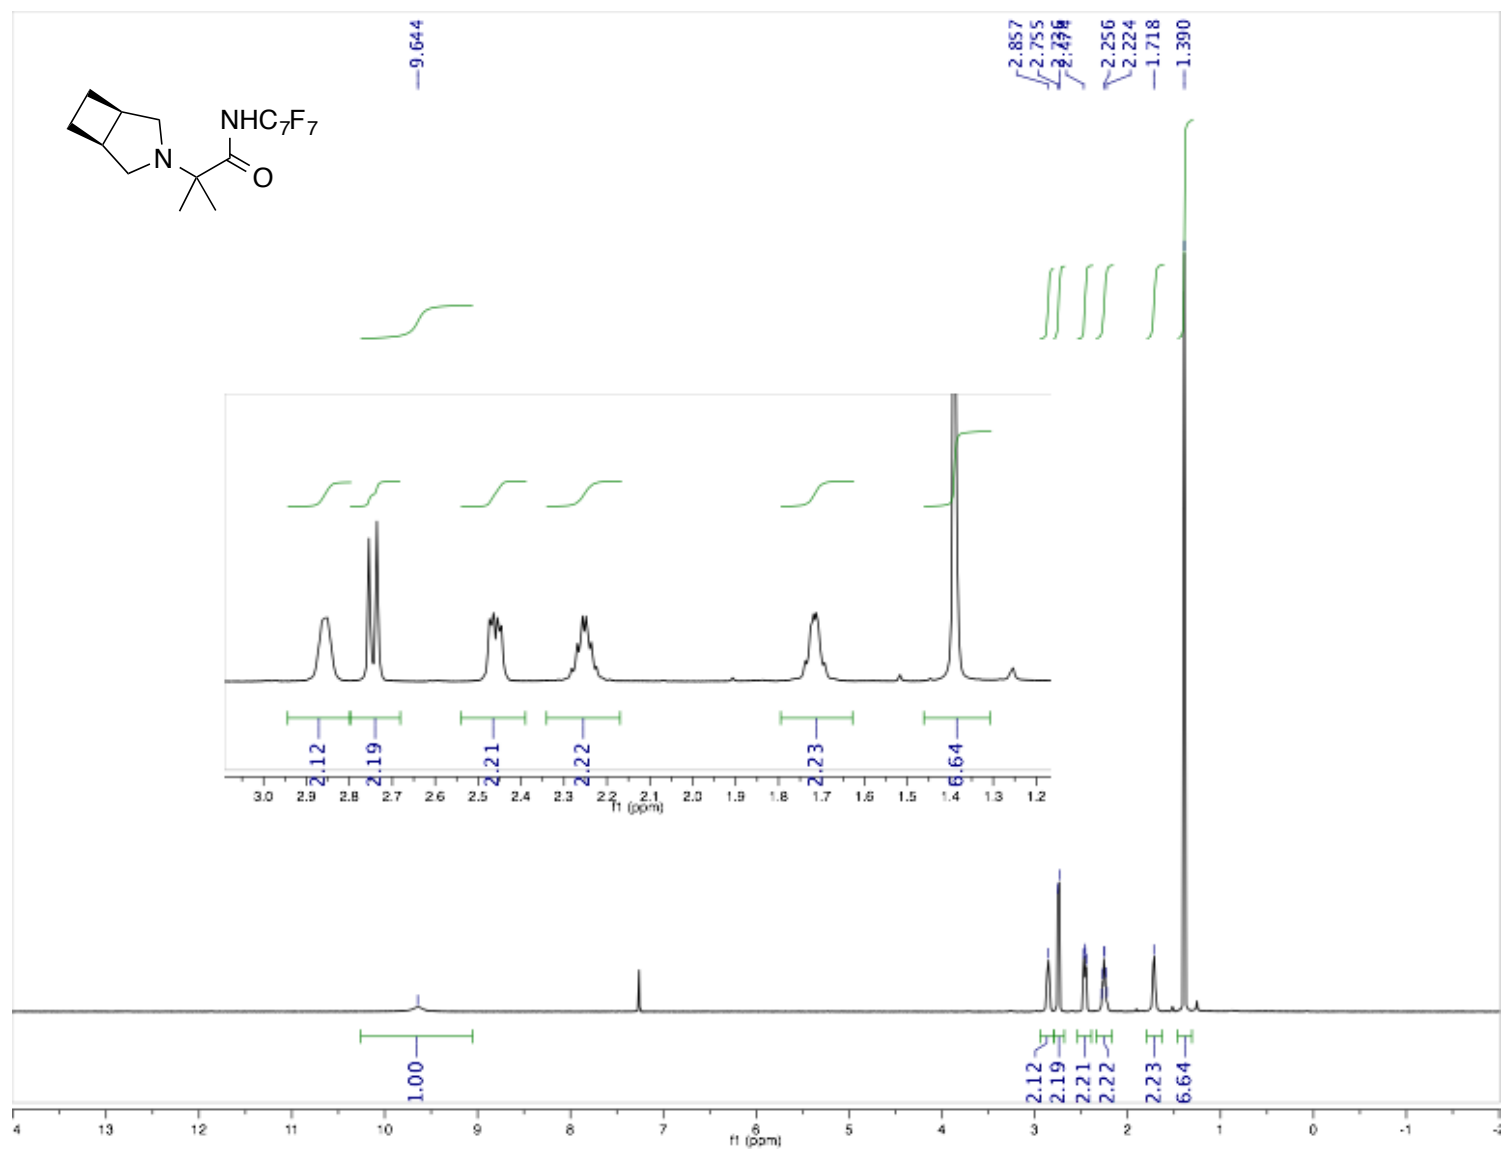

<sup>1</sup>H NMR Spectrum of **S12** in CDCl<sub>3</sub>

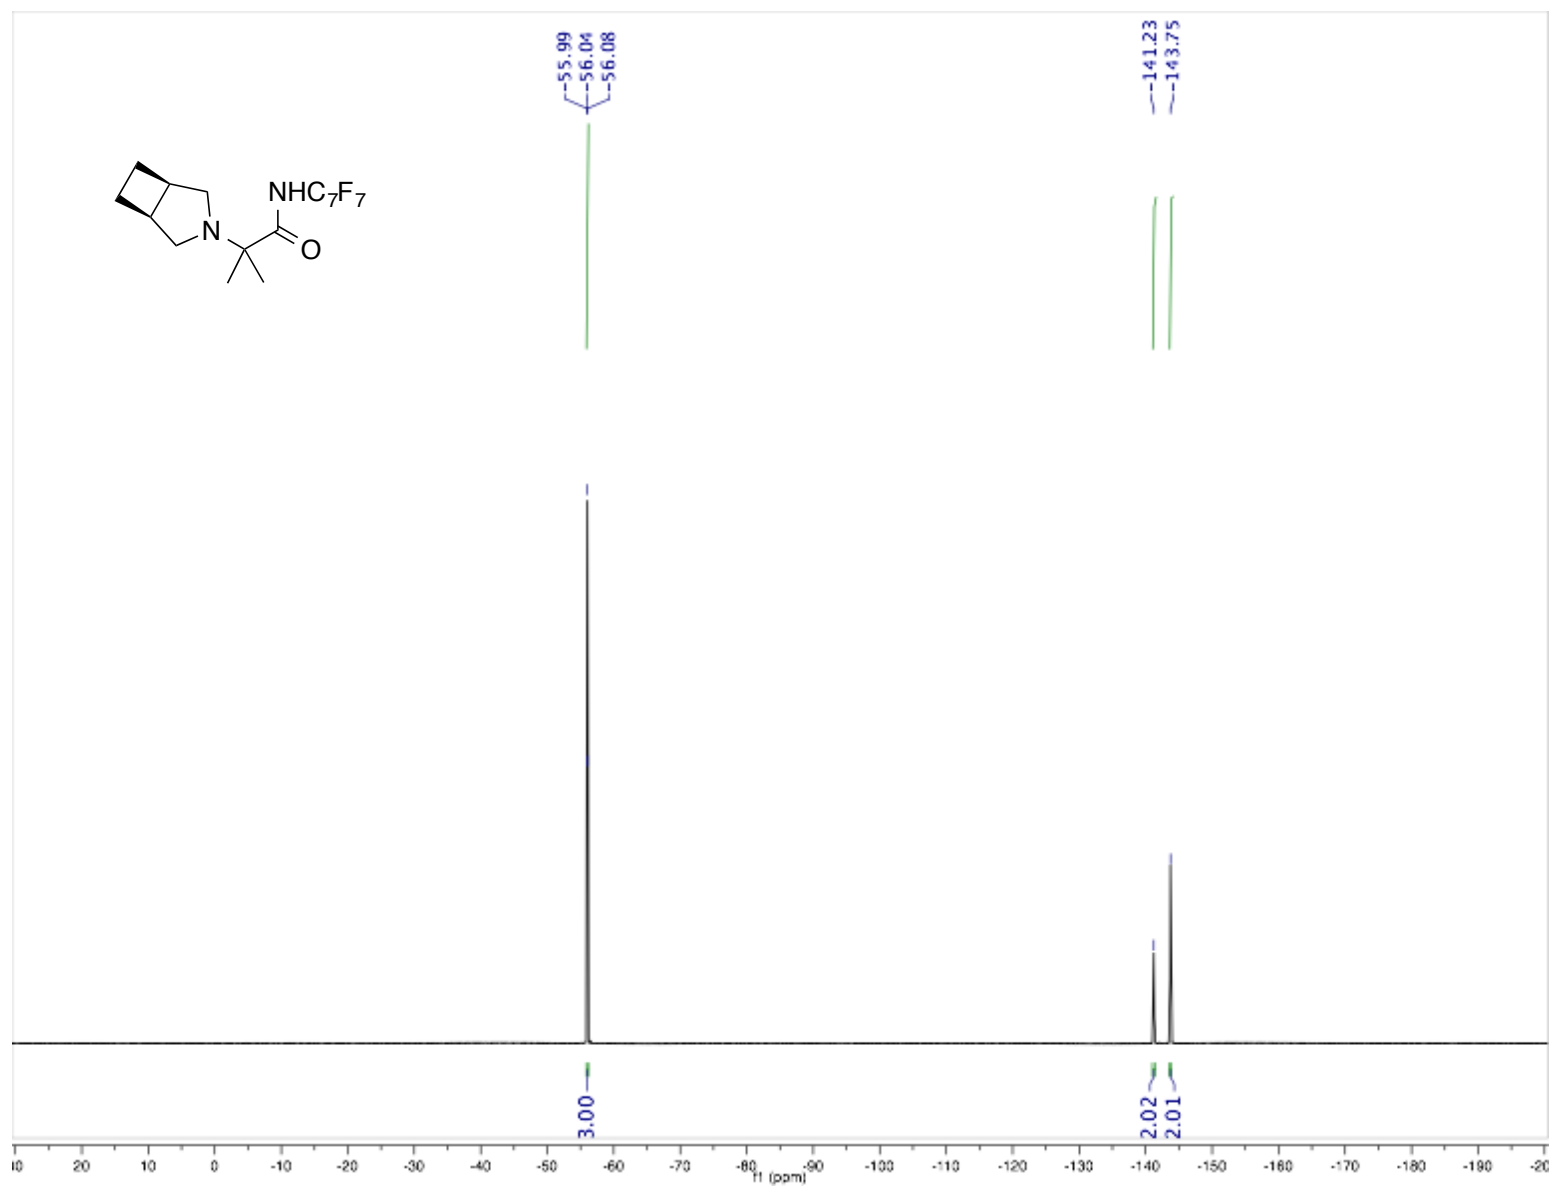

$^{19}\text{F}$  NMR Spectrum of **S12** in  $\text{CDCl}_3$

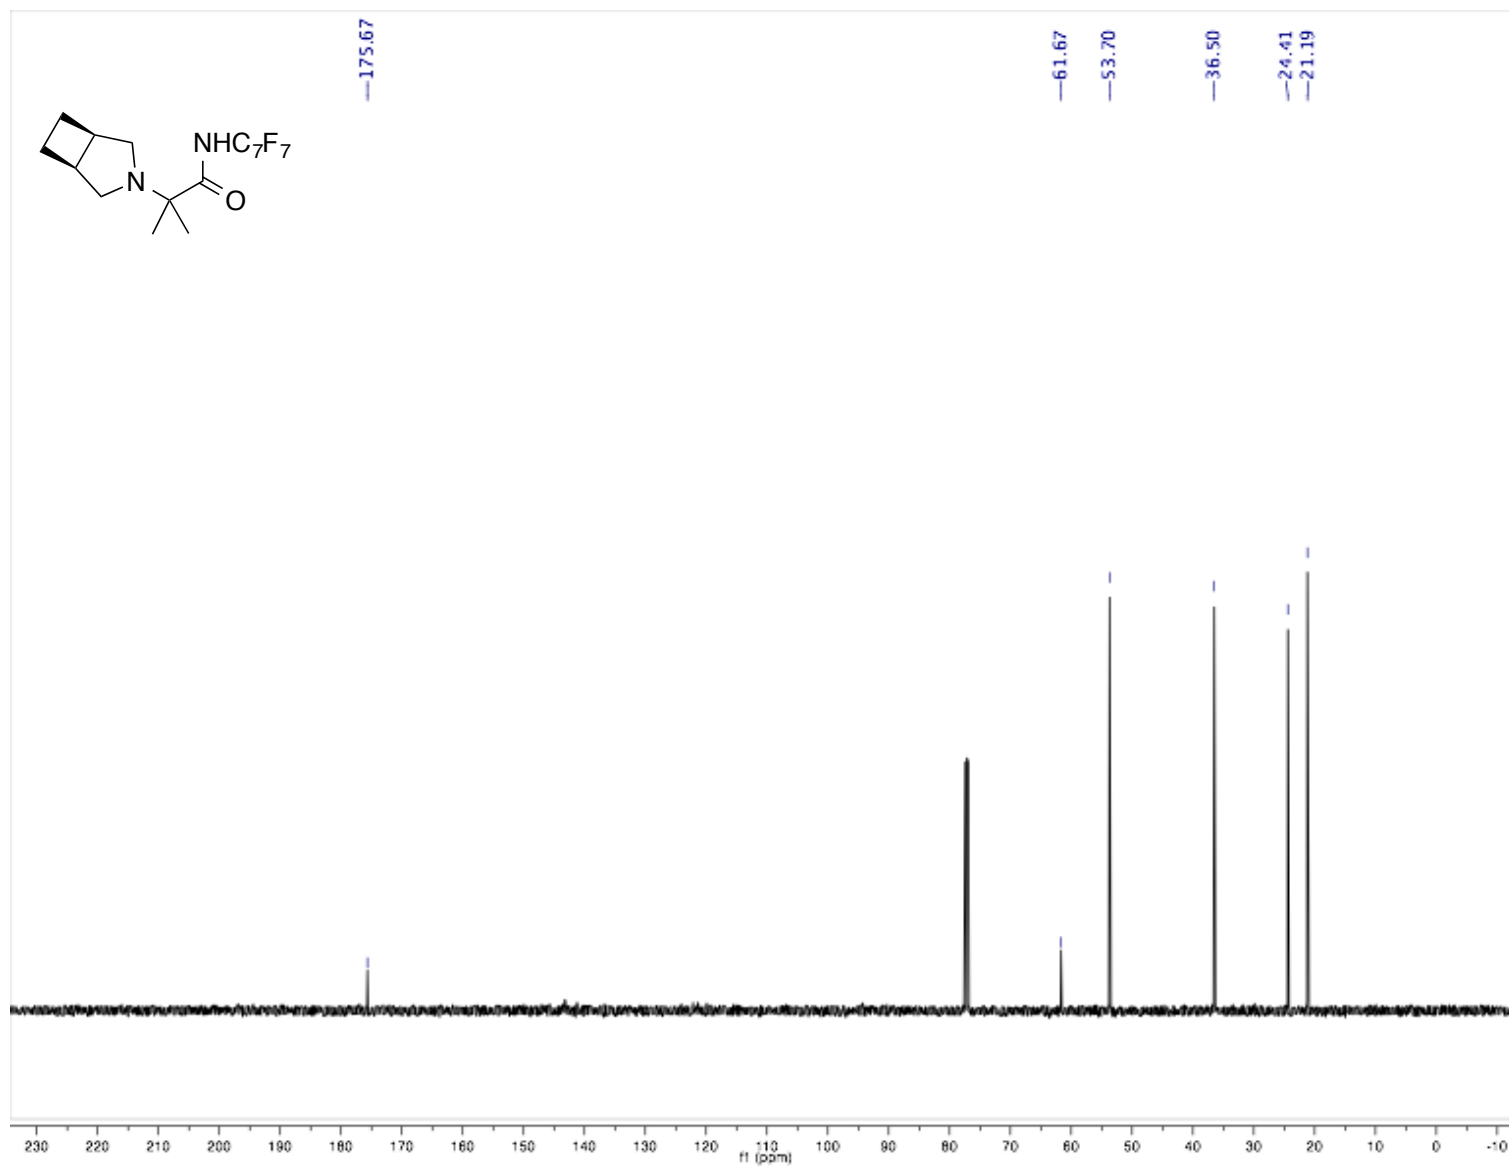

$^{13}\text{C}$  NMR Spectrum of **S12** in  $\text{CDCl}_3$

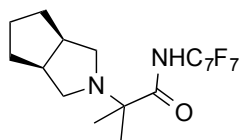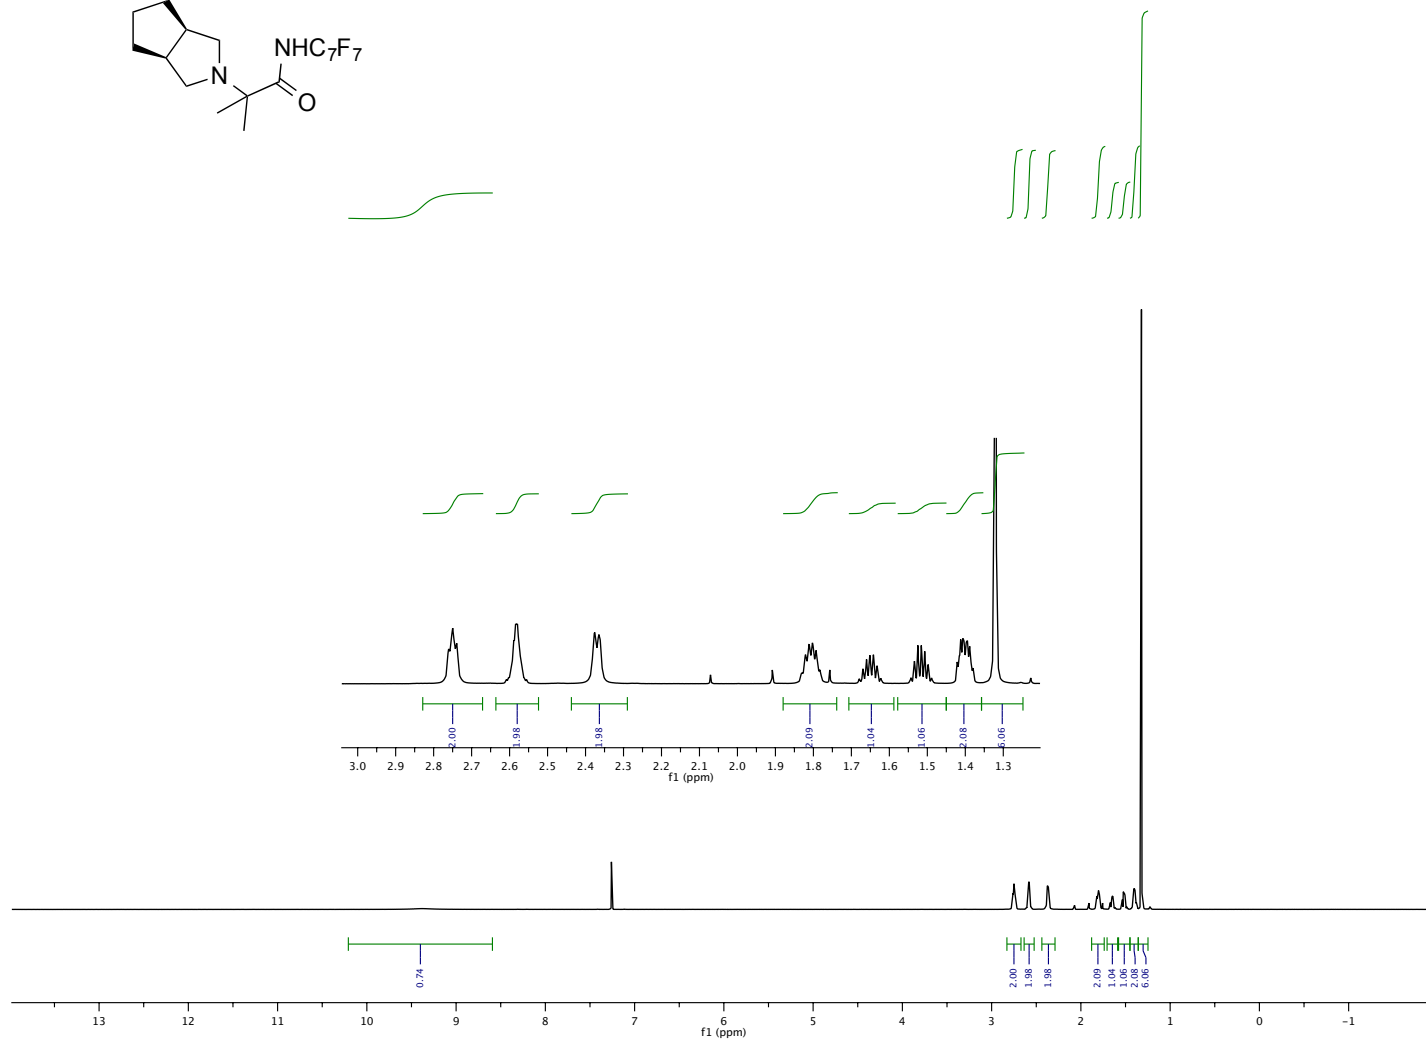

<sup>1</sup>H NMR Spectrum of S13 in CDCl<sub>3</sub>

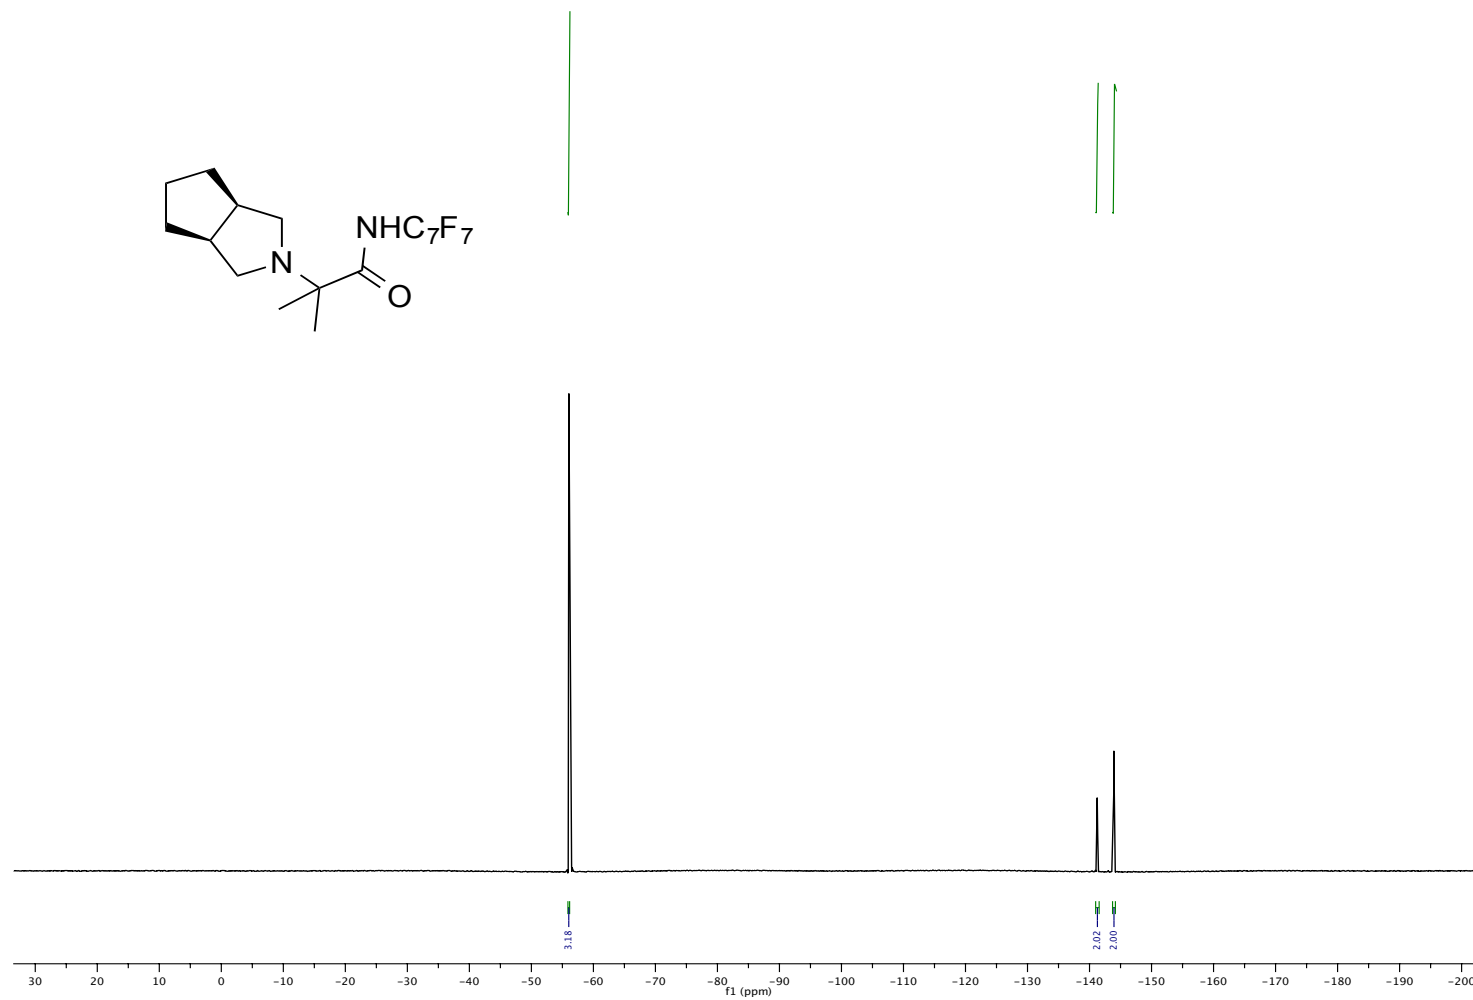

$^{19}\text{F}$  NMR Spectrum of **S13** in  $\text{CDCl}_3$

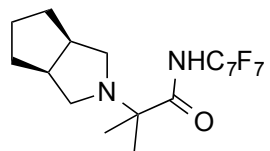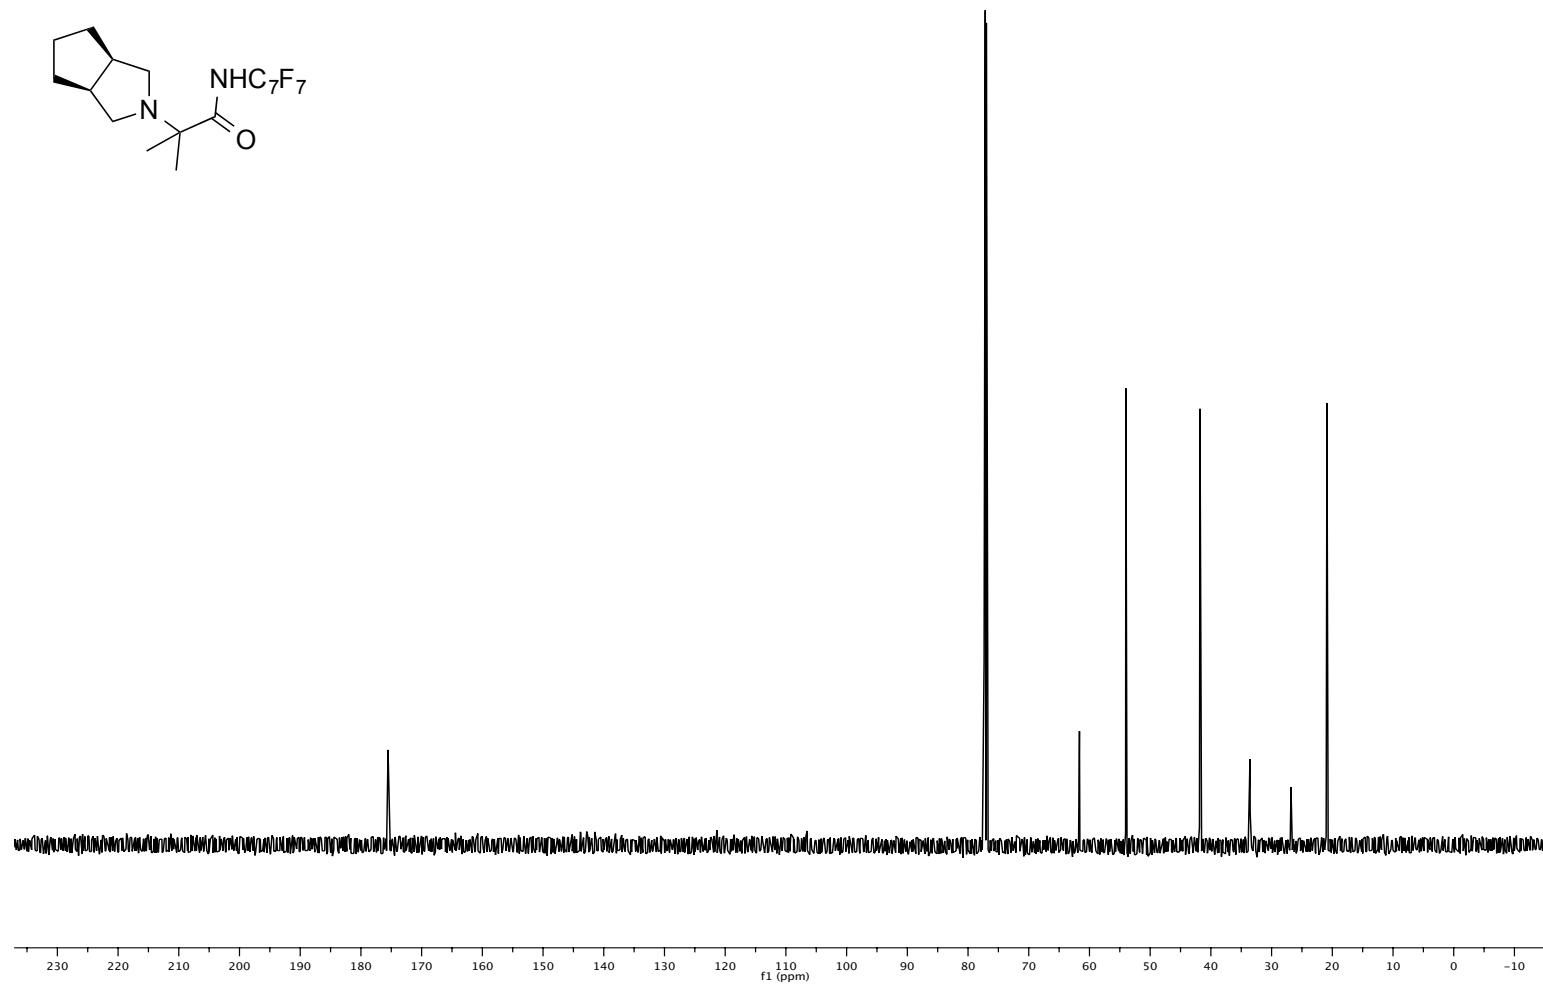

<sup>13</sup>C NMR Spectrum of S13 in CDCl<sub>3</sub>

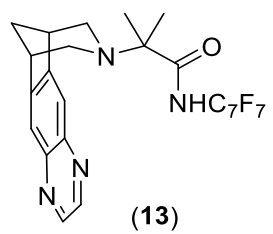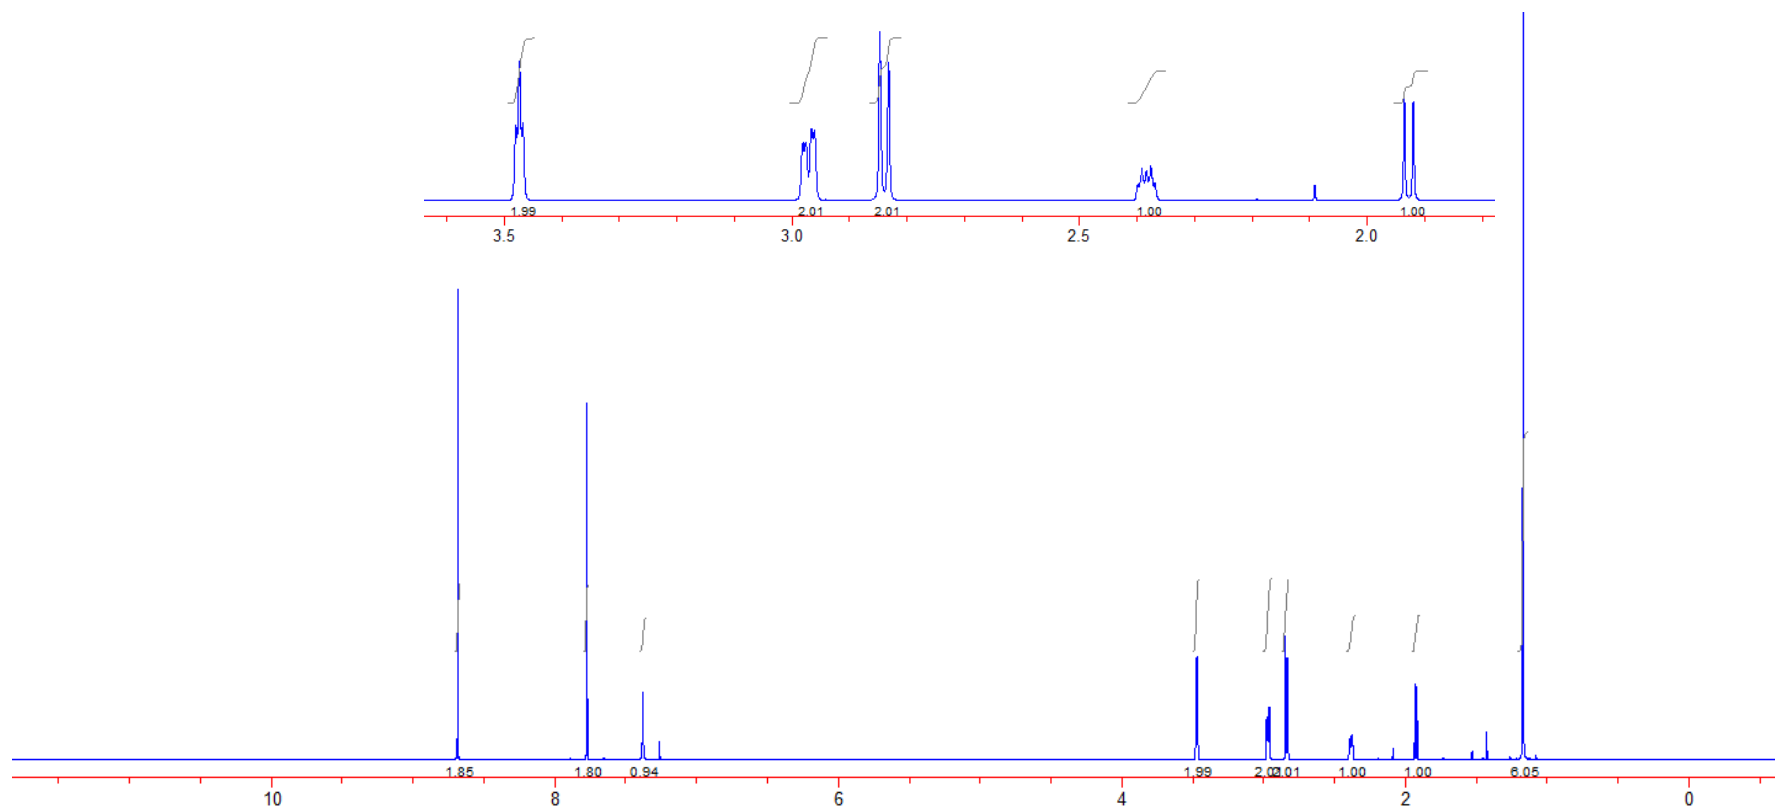

<sup>1</sup>H NMR Spectrum in CDCl<sub>3</sub>

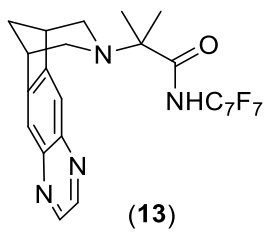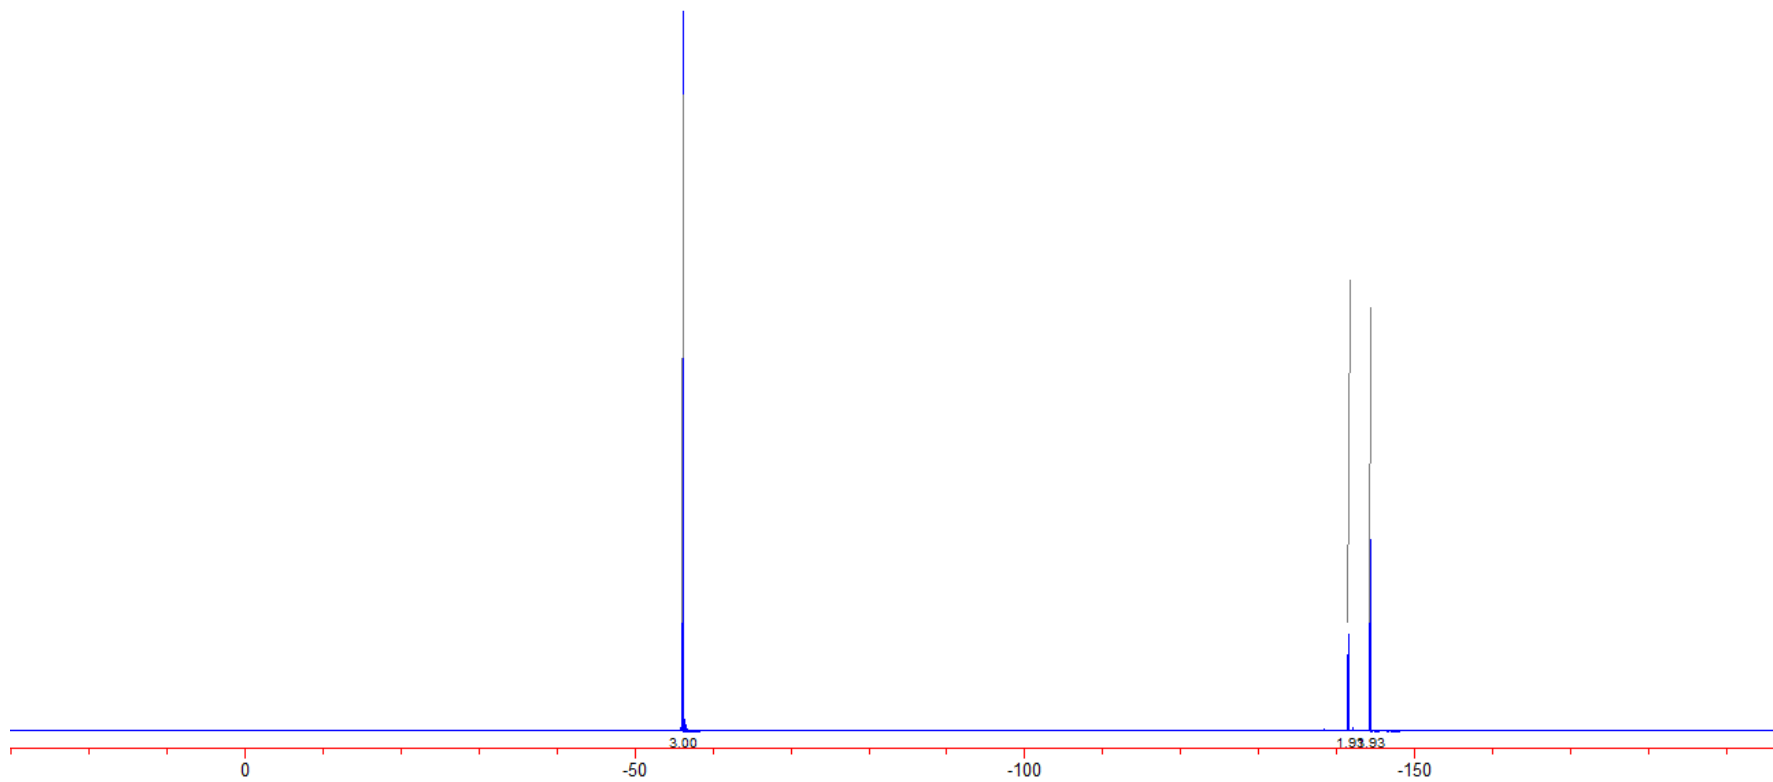

$^{19}\text{F}$  NMR Spectrum in  $\text{CDCl}_3$



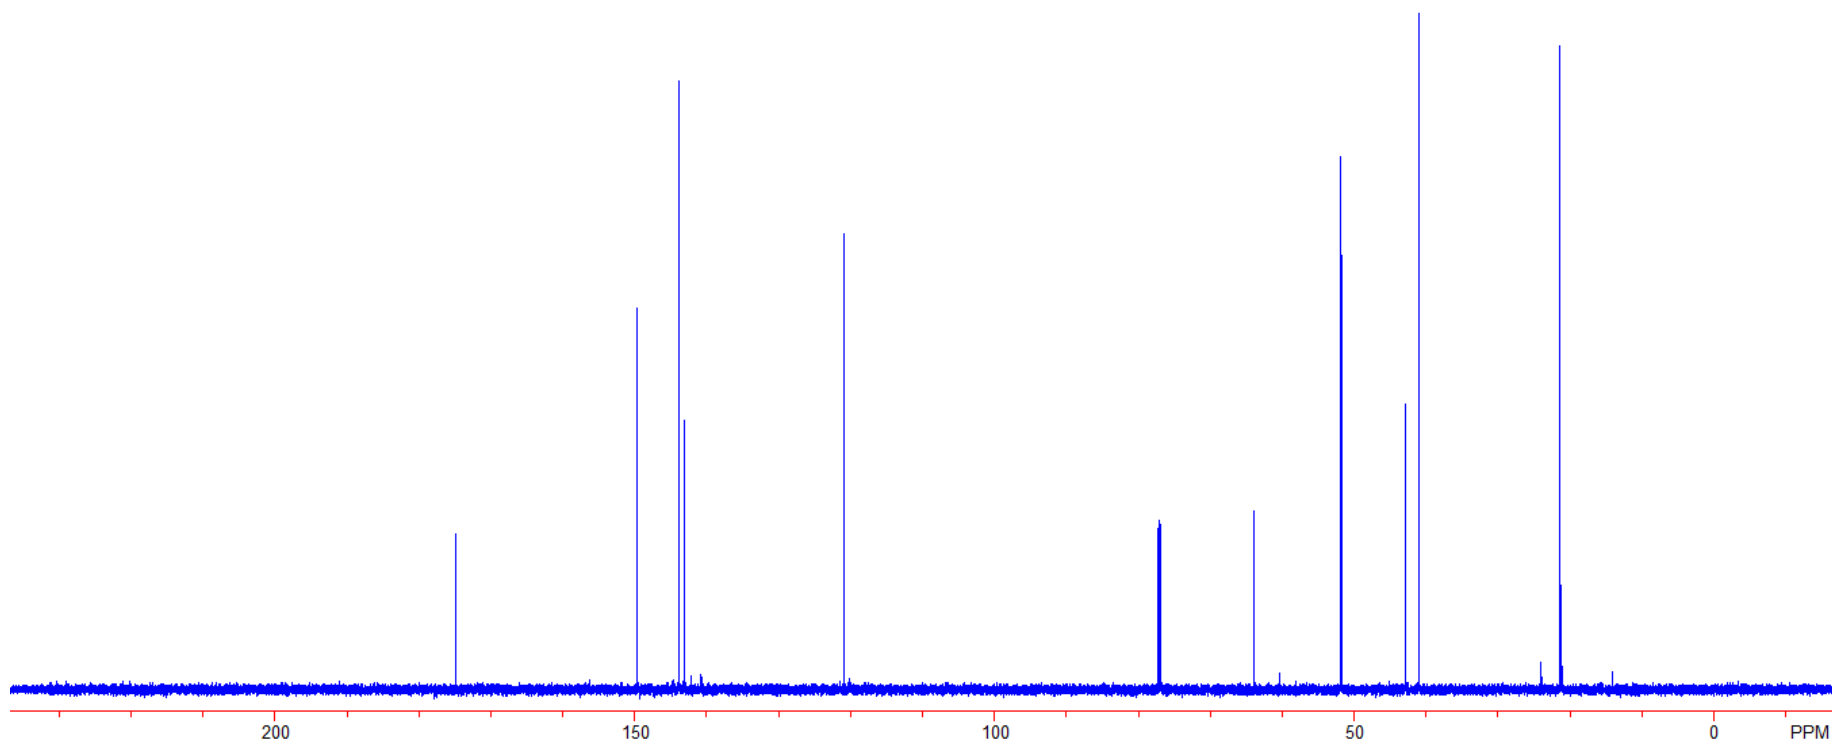

$^{13}\text{C}$  NMR Spectrum in  $\text{CDCl}_3$

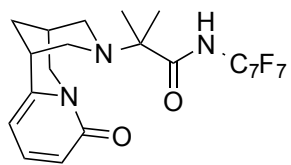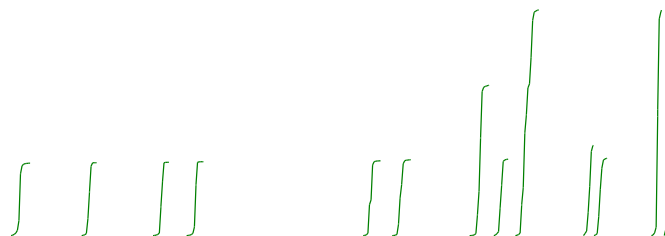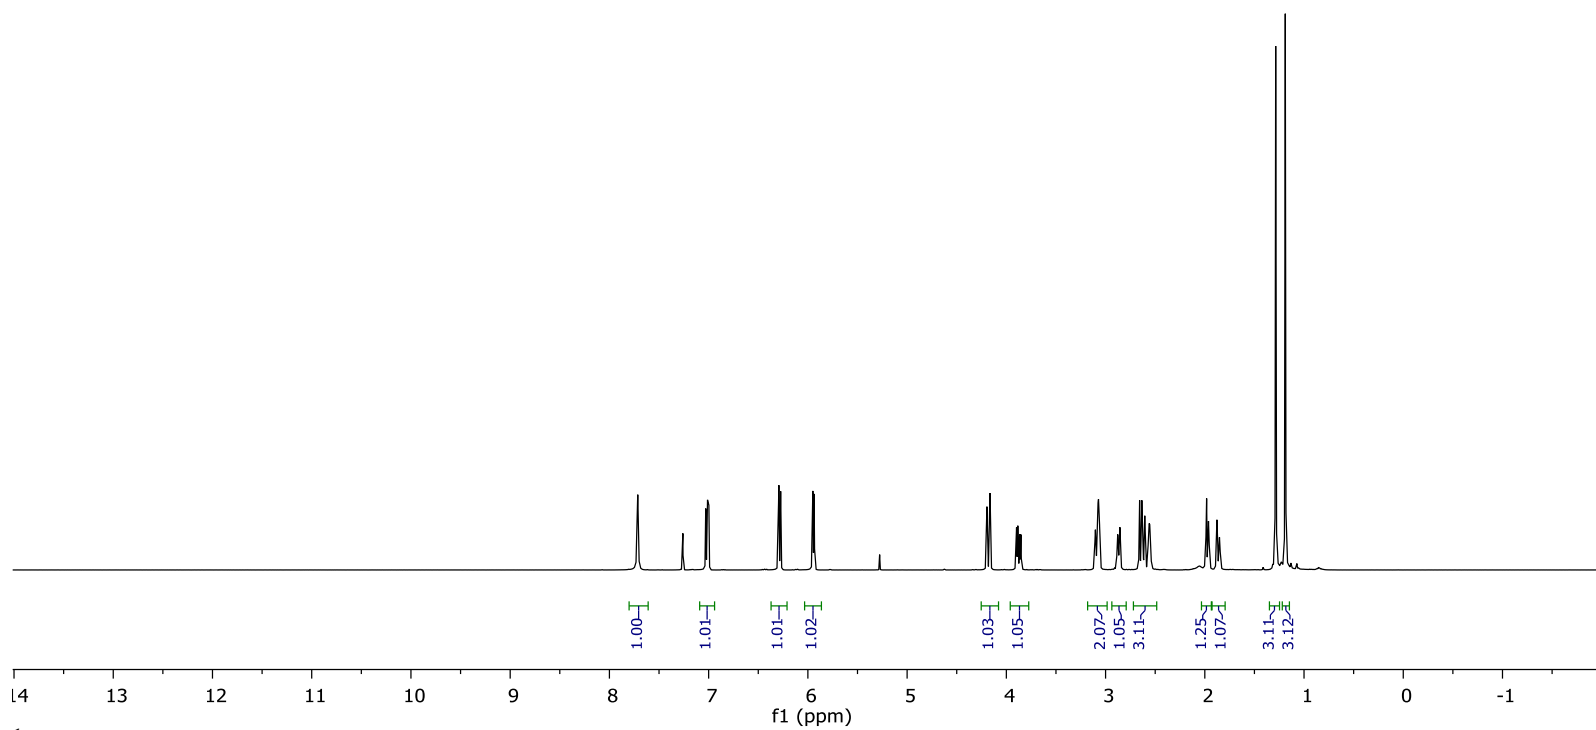

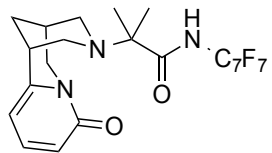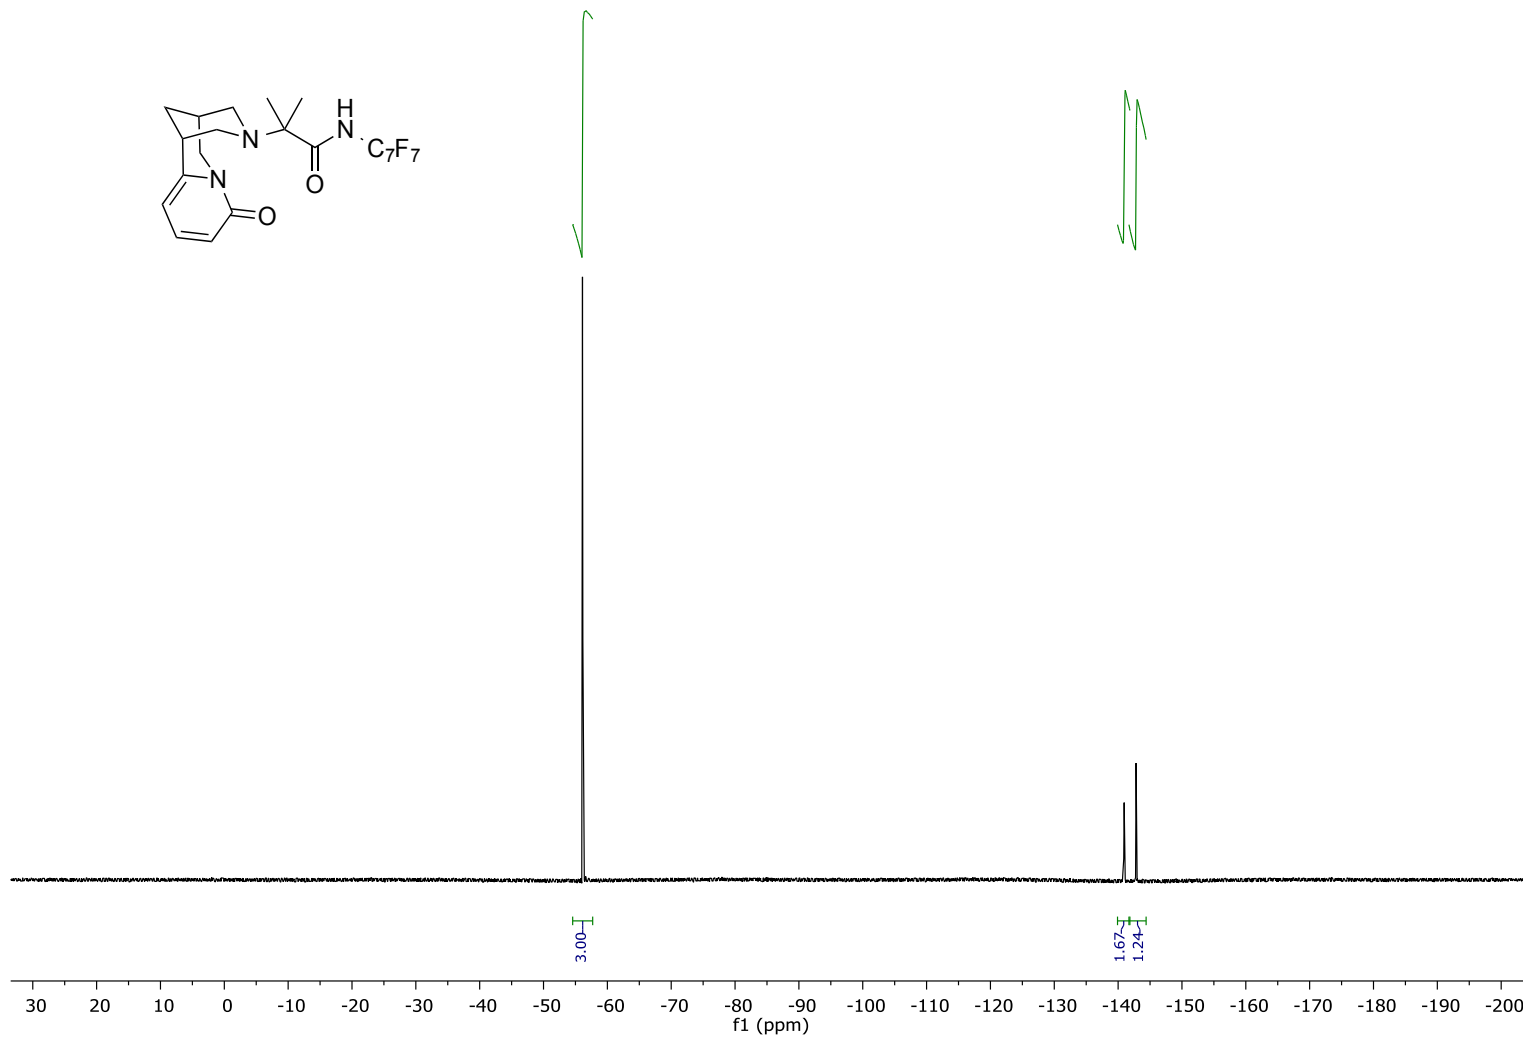

$^{19}\text{F}$  NMR Spectrum of **16** in  $\text{CDCl}_3$

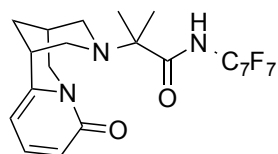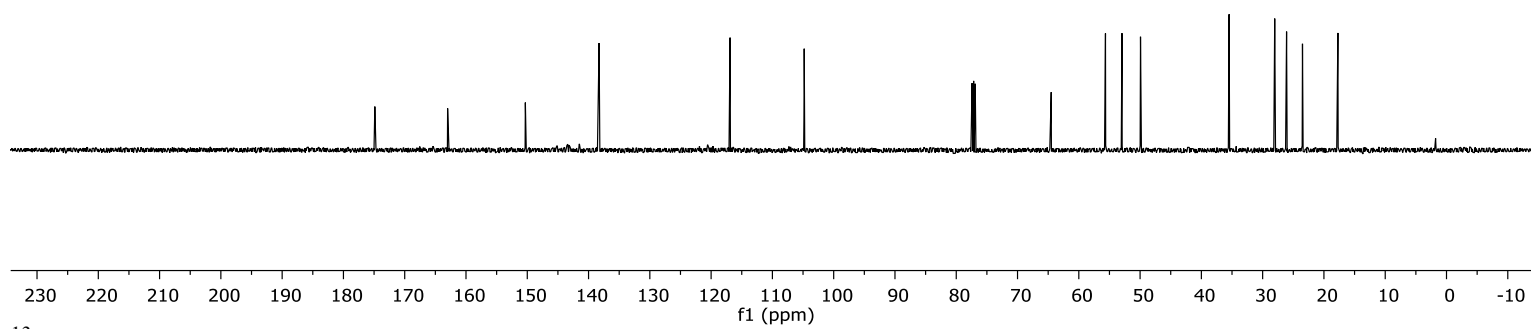

$^{13}\text{C}$  NMR Spectrum of **16** in  $\text{CDCl}_3$

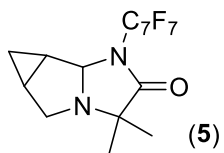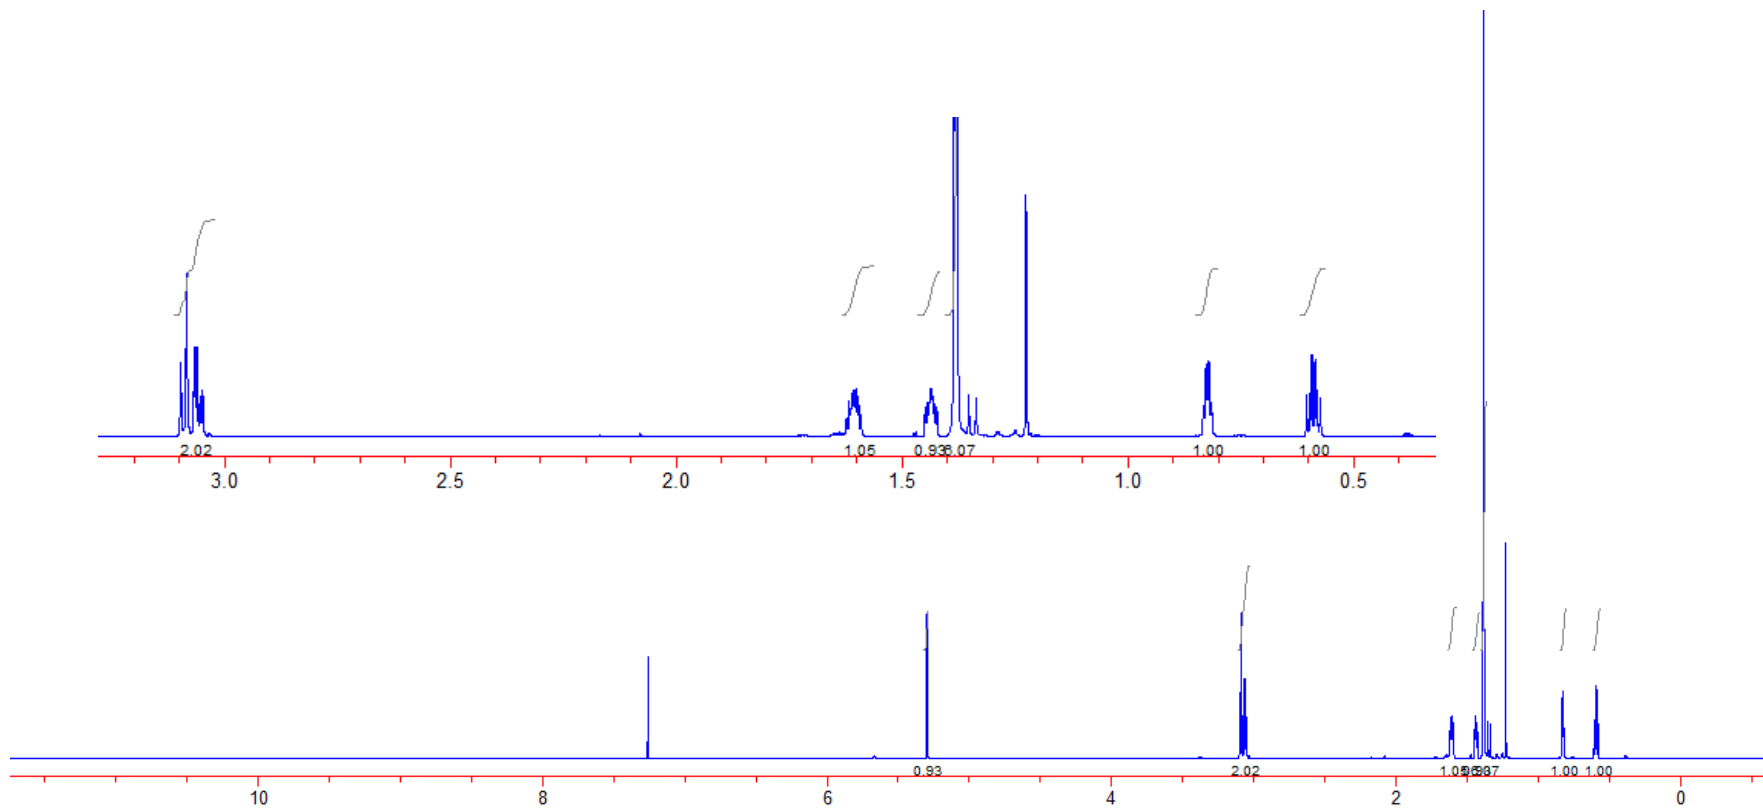

$^1\text{H}$  NMR Spectrum in  $\text{CDCl}_3$

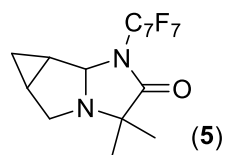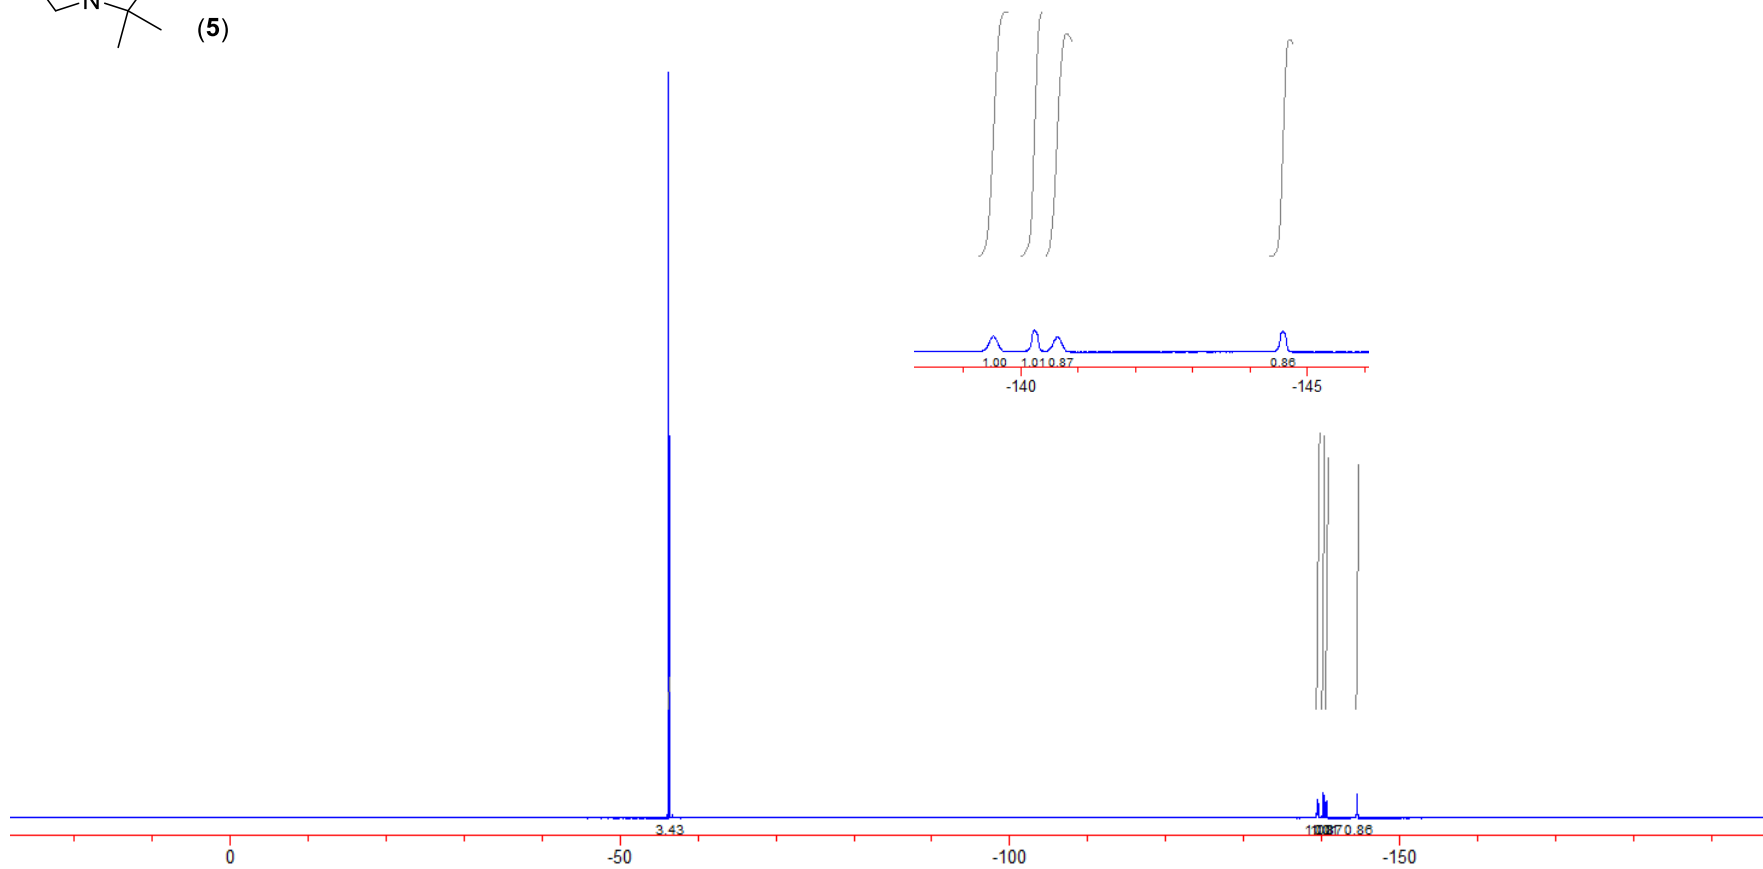

$^{19}\text{F}$  NMR Spectrum in  $\text{CDCl}_3$

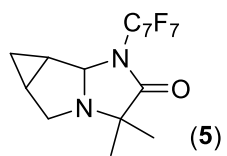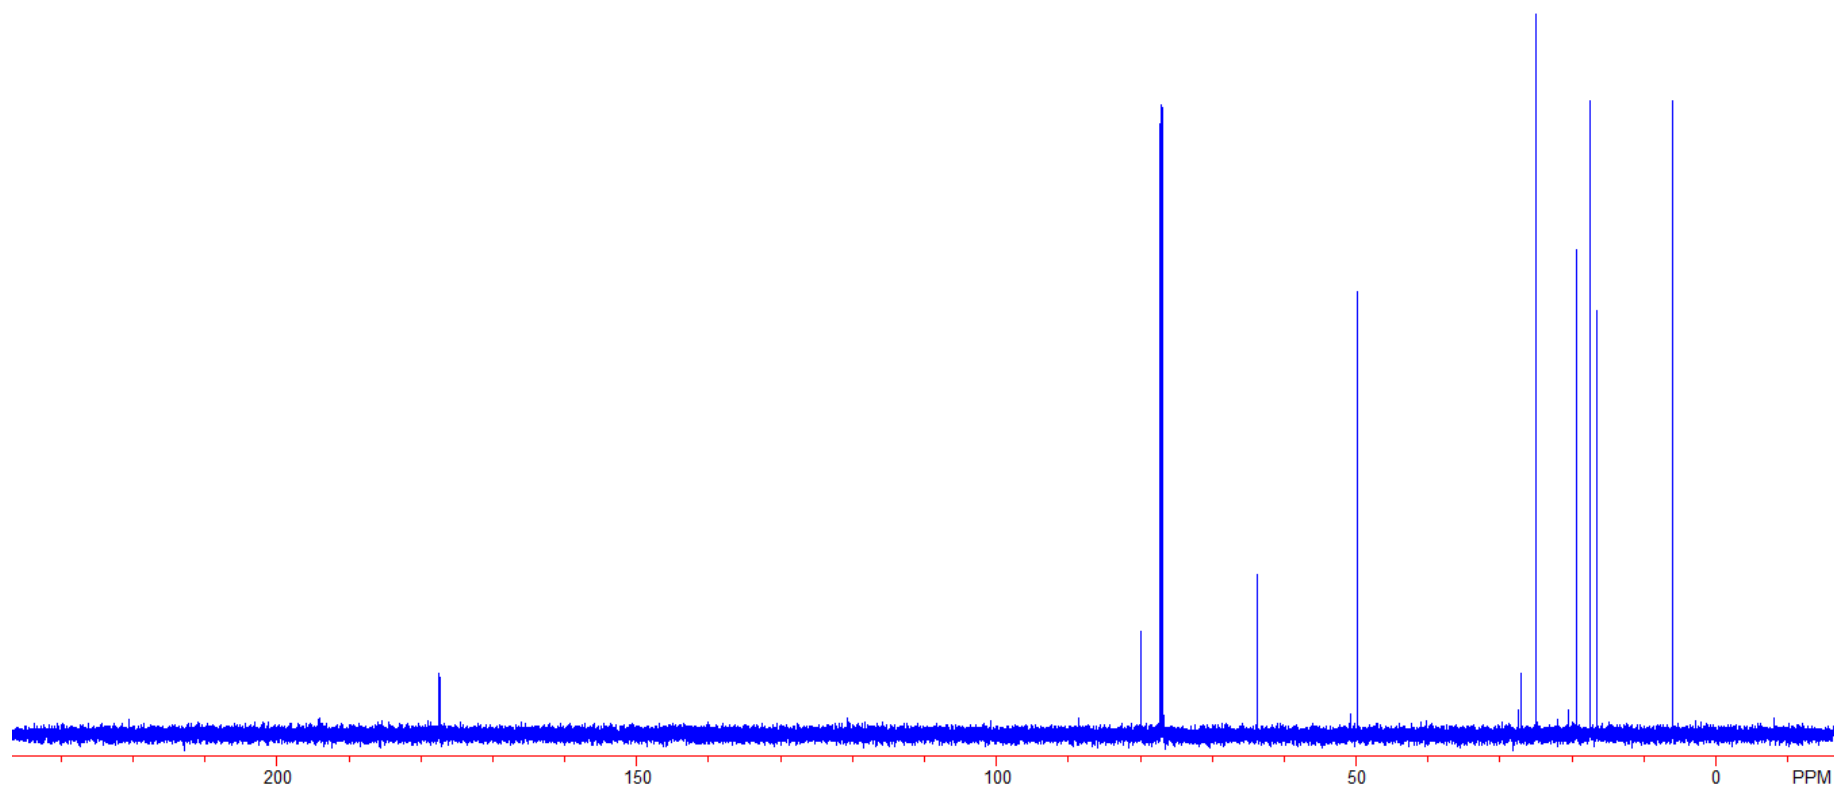

13C NMR Spectrum in CDCl<sub>3</sub>

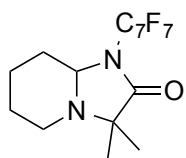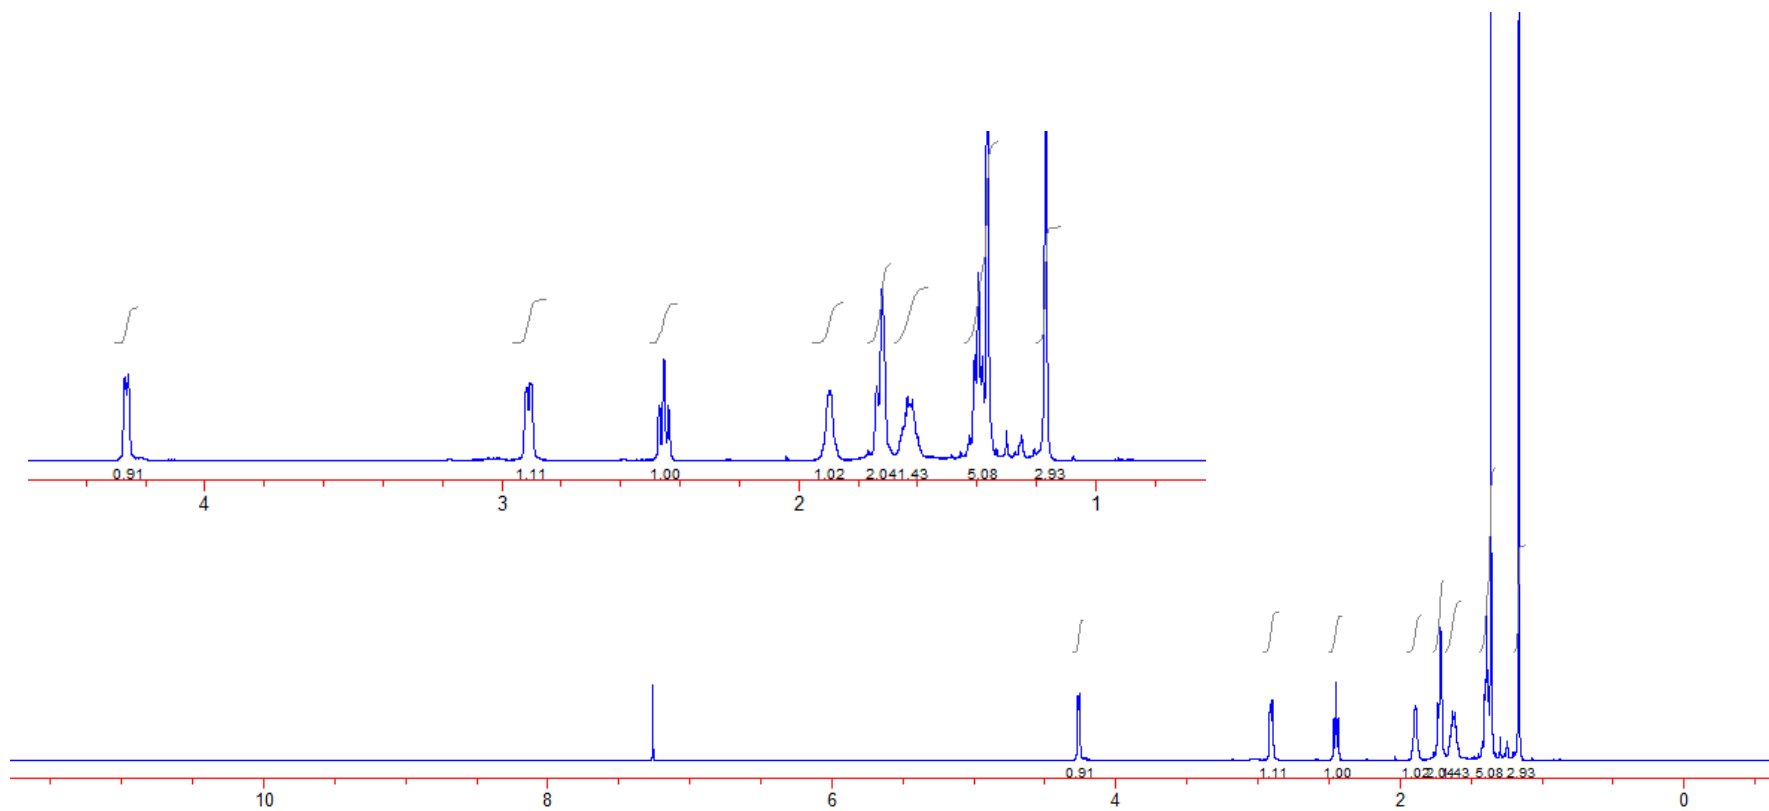

<sup>1</sup>H NMR Spectrum of S14 in CDCl<sub>3</sub>



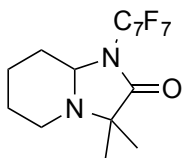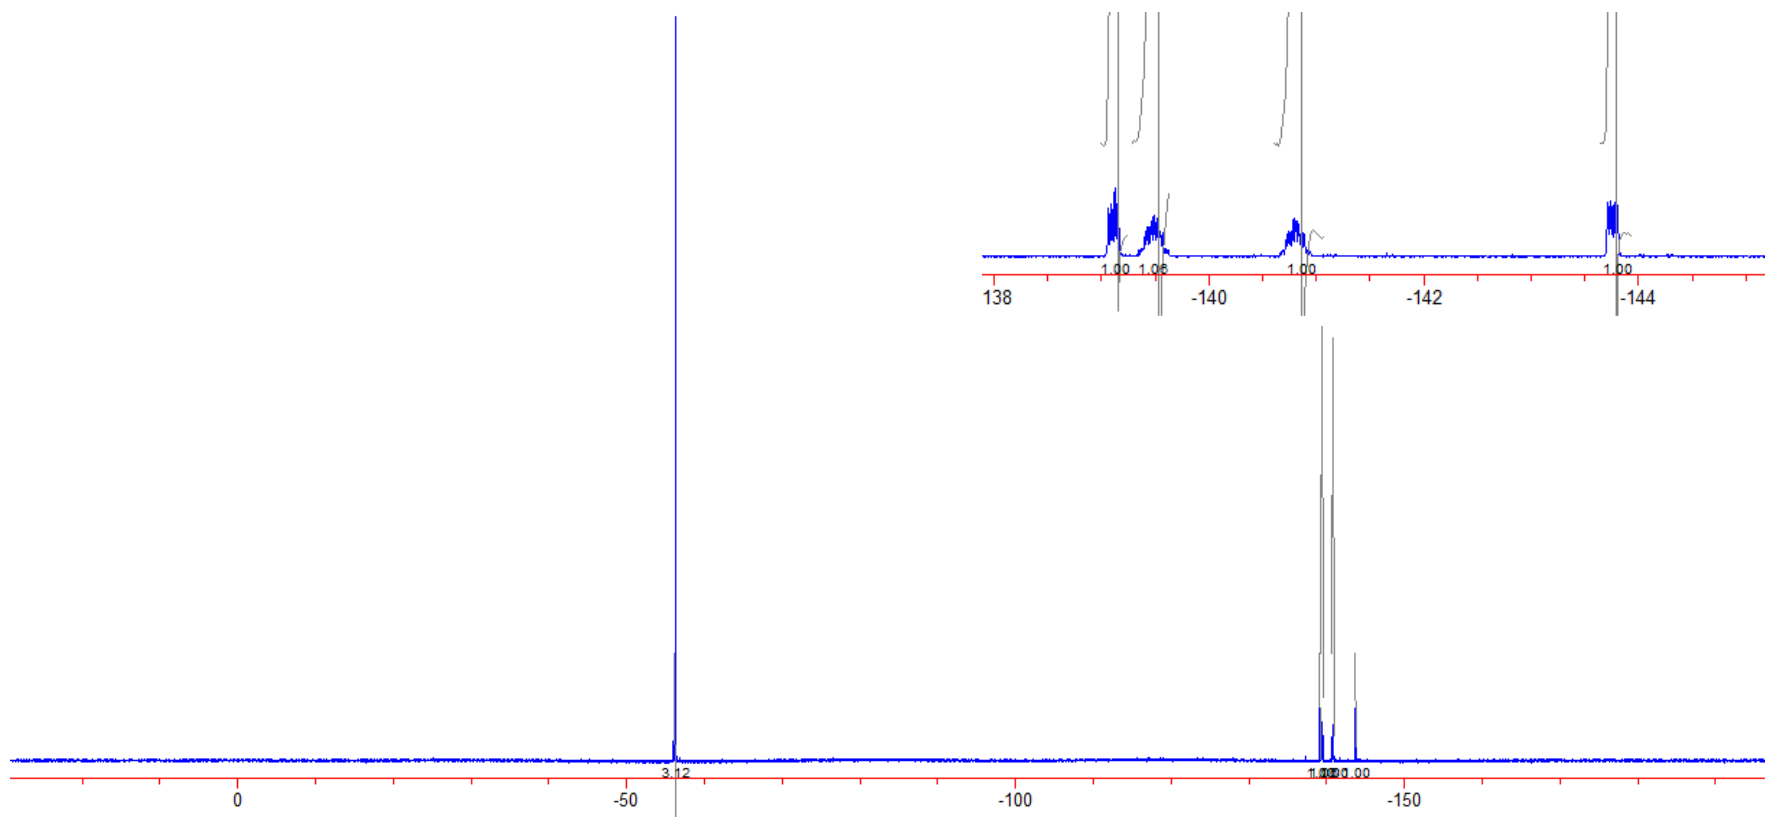

$^{19}\text{F}$  NMR Spectrum of **S14** in  $\text{CDCl}_3$

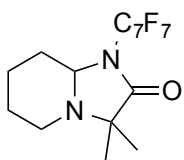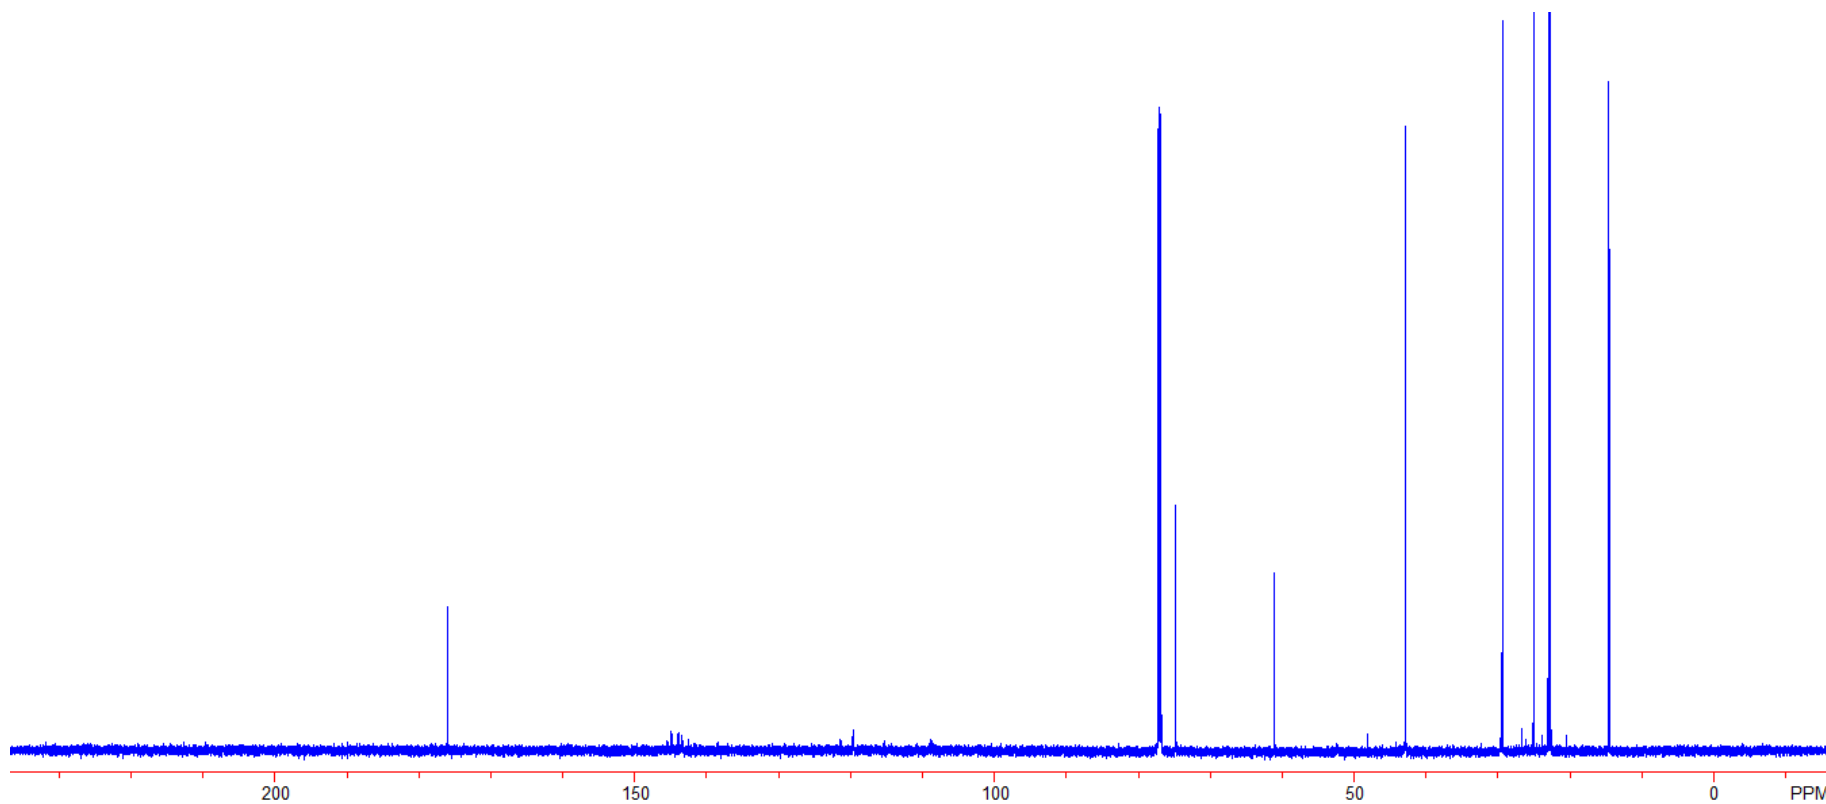

<sup>13</sup>C NMR Spectrum of S14 in CDCl<sub>3</sub>

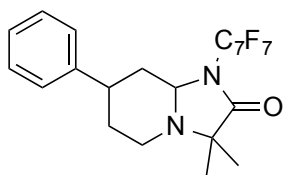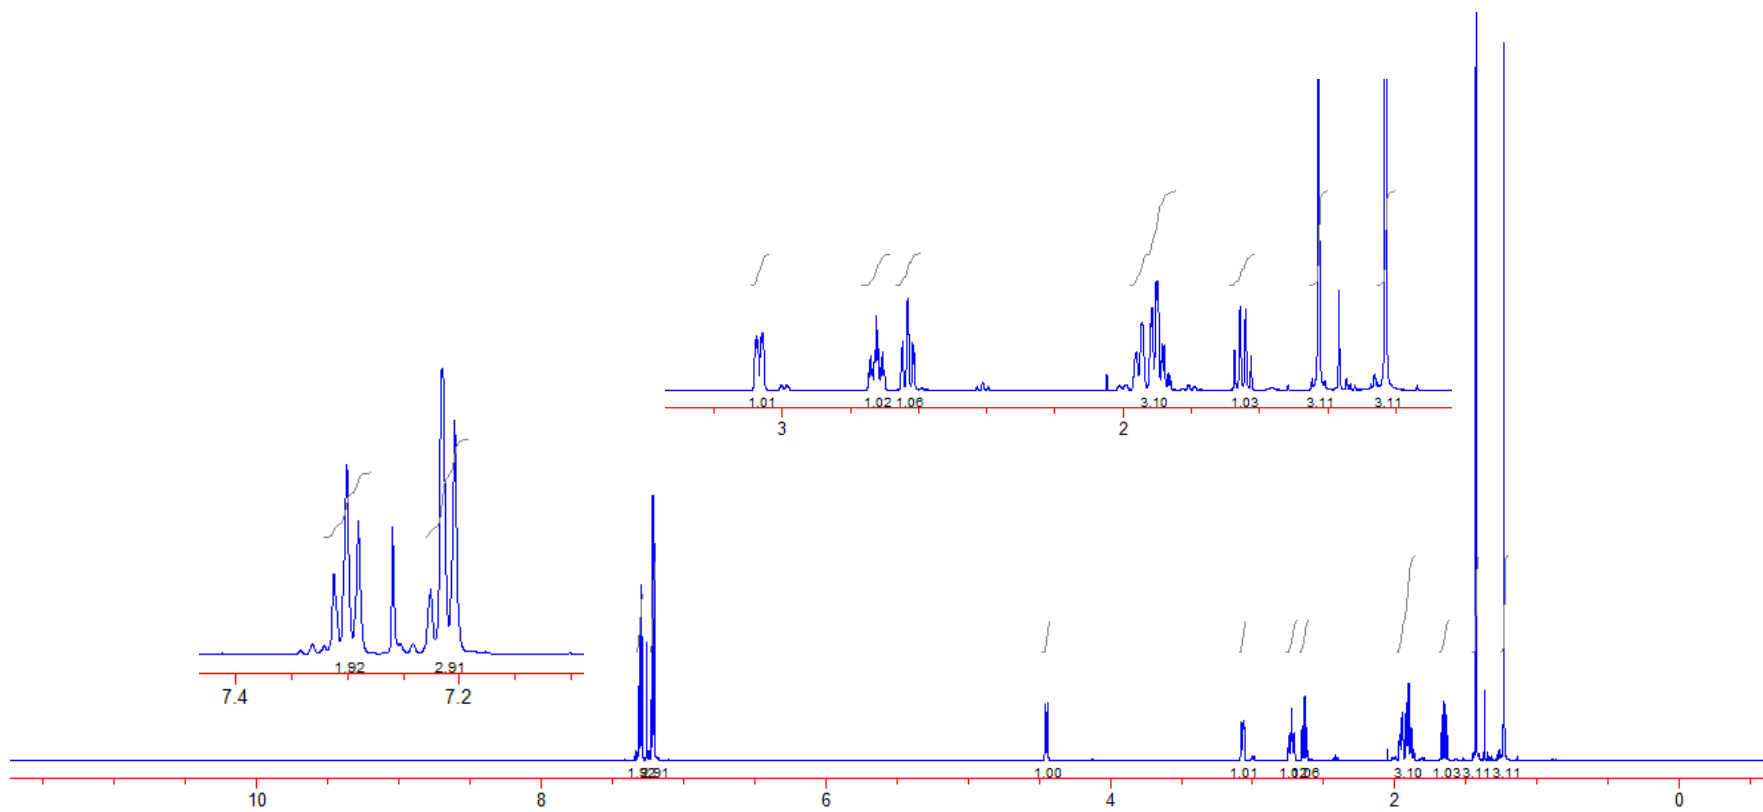

<sup>1</sup>H NMR Spectrum of **S15** in CDCl<sub>3</sub>

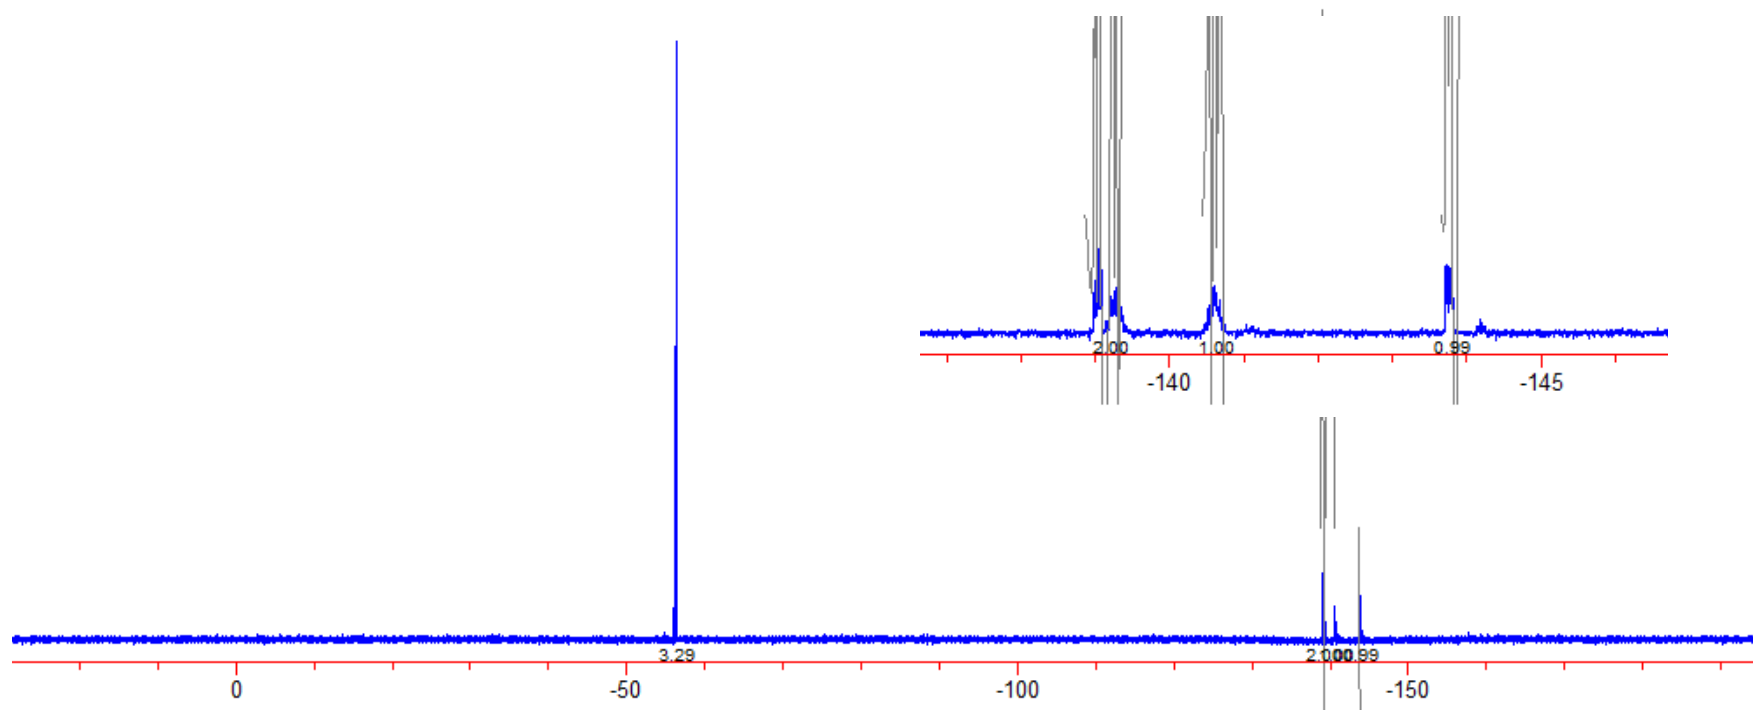

$^{19}\text{F}$  NMR Spectrum of **S15** in  $\text{CDCl}_3$

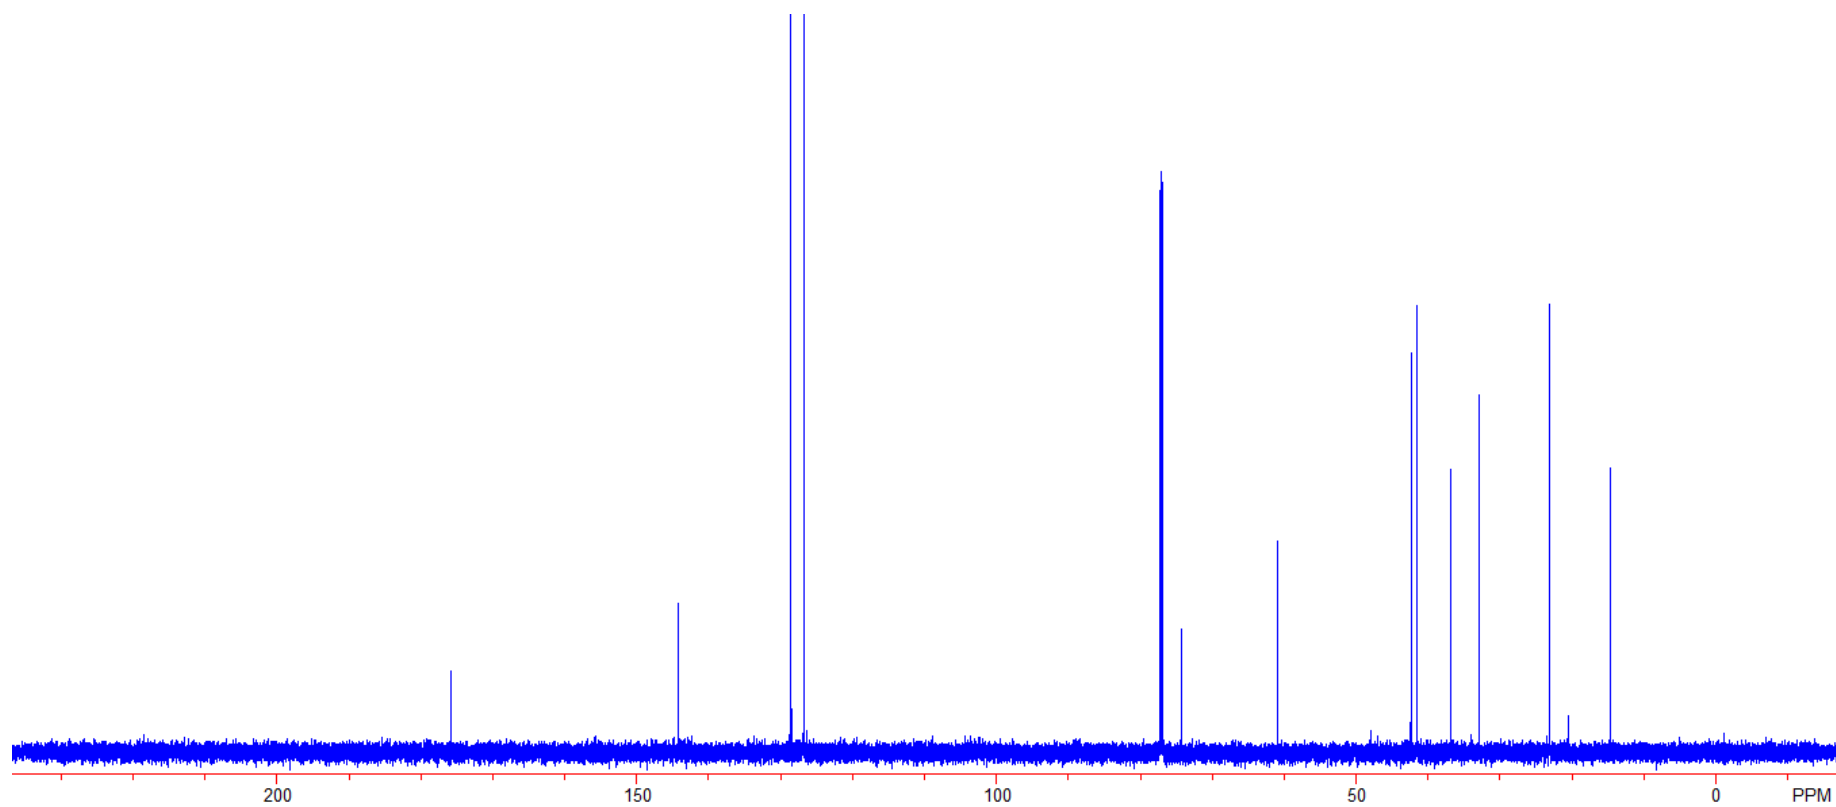

<sup>13</sup>C NMR Spectrum of **S15** in CDCl<sub>3</sub>

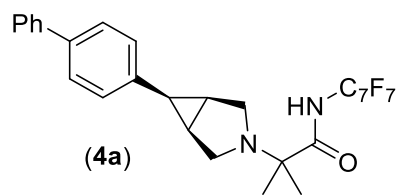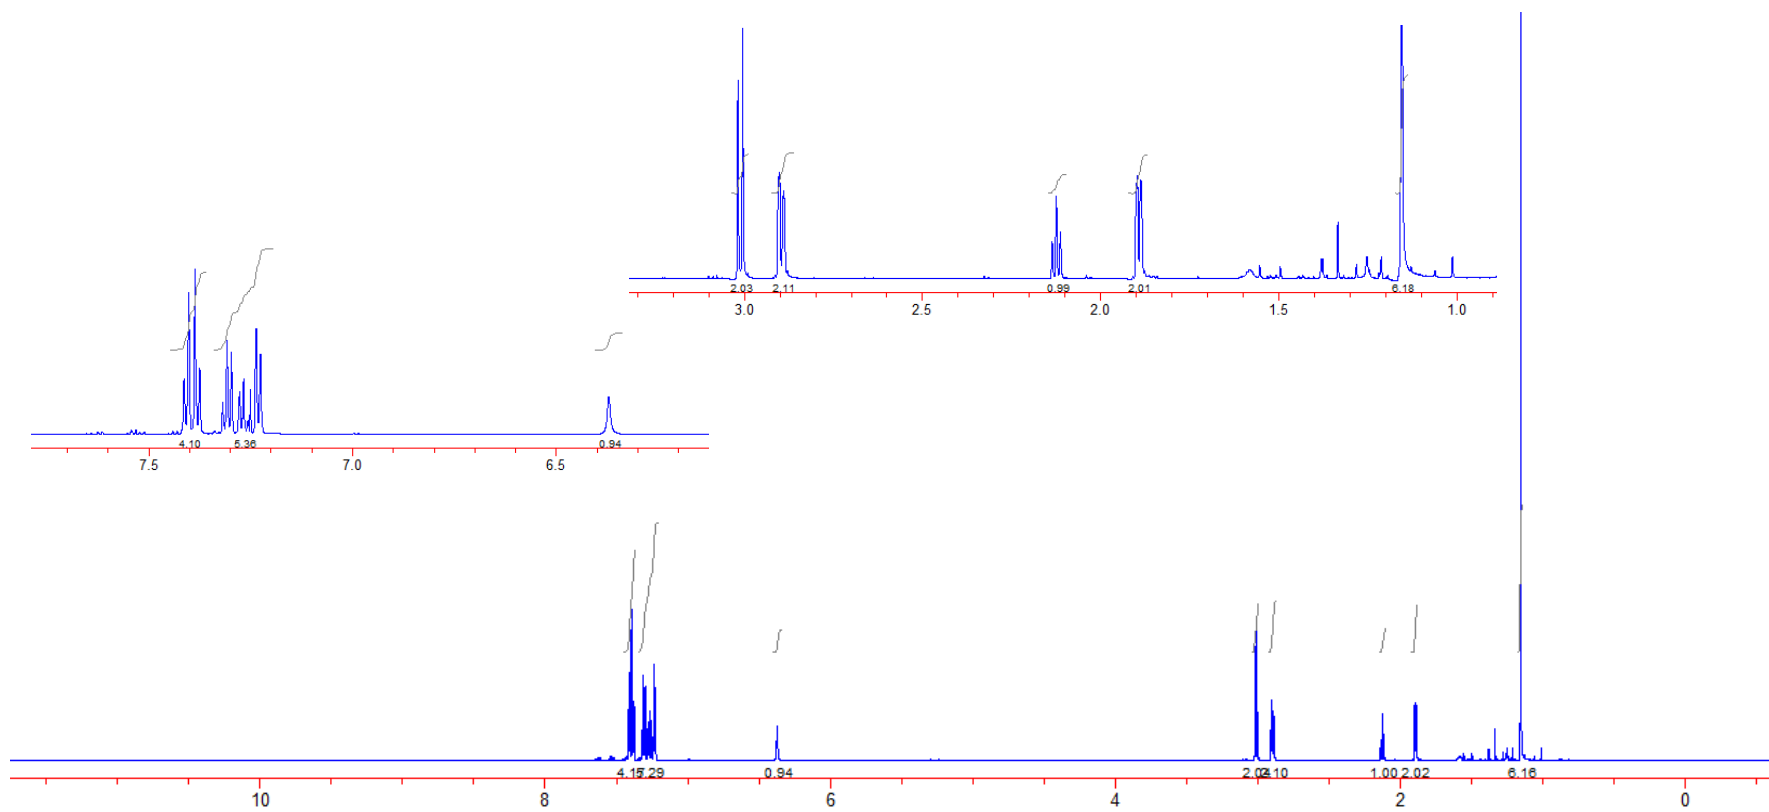

$^1\text{H}$  NMR Spectrum in  $\text{CDCl}_3$

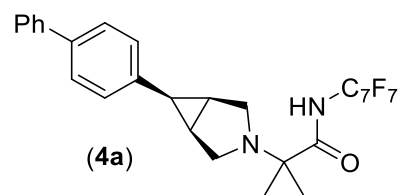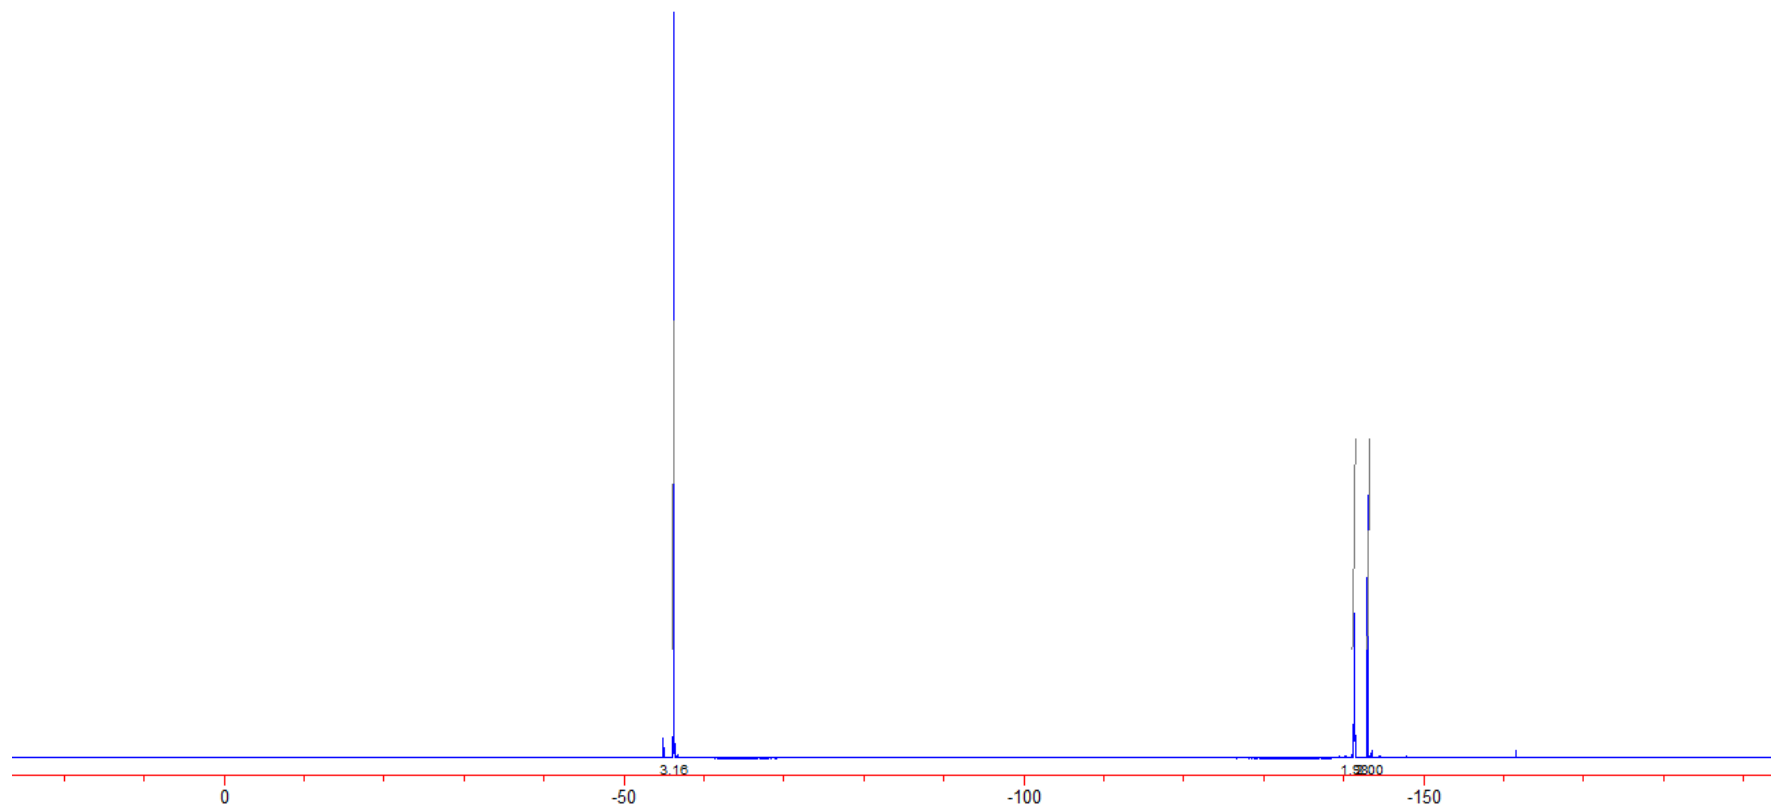

$^{19}\text{F}$  NMR Spectrum in  $\text{CDCl}_3$

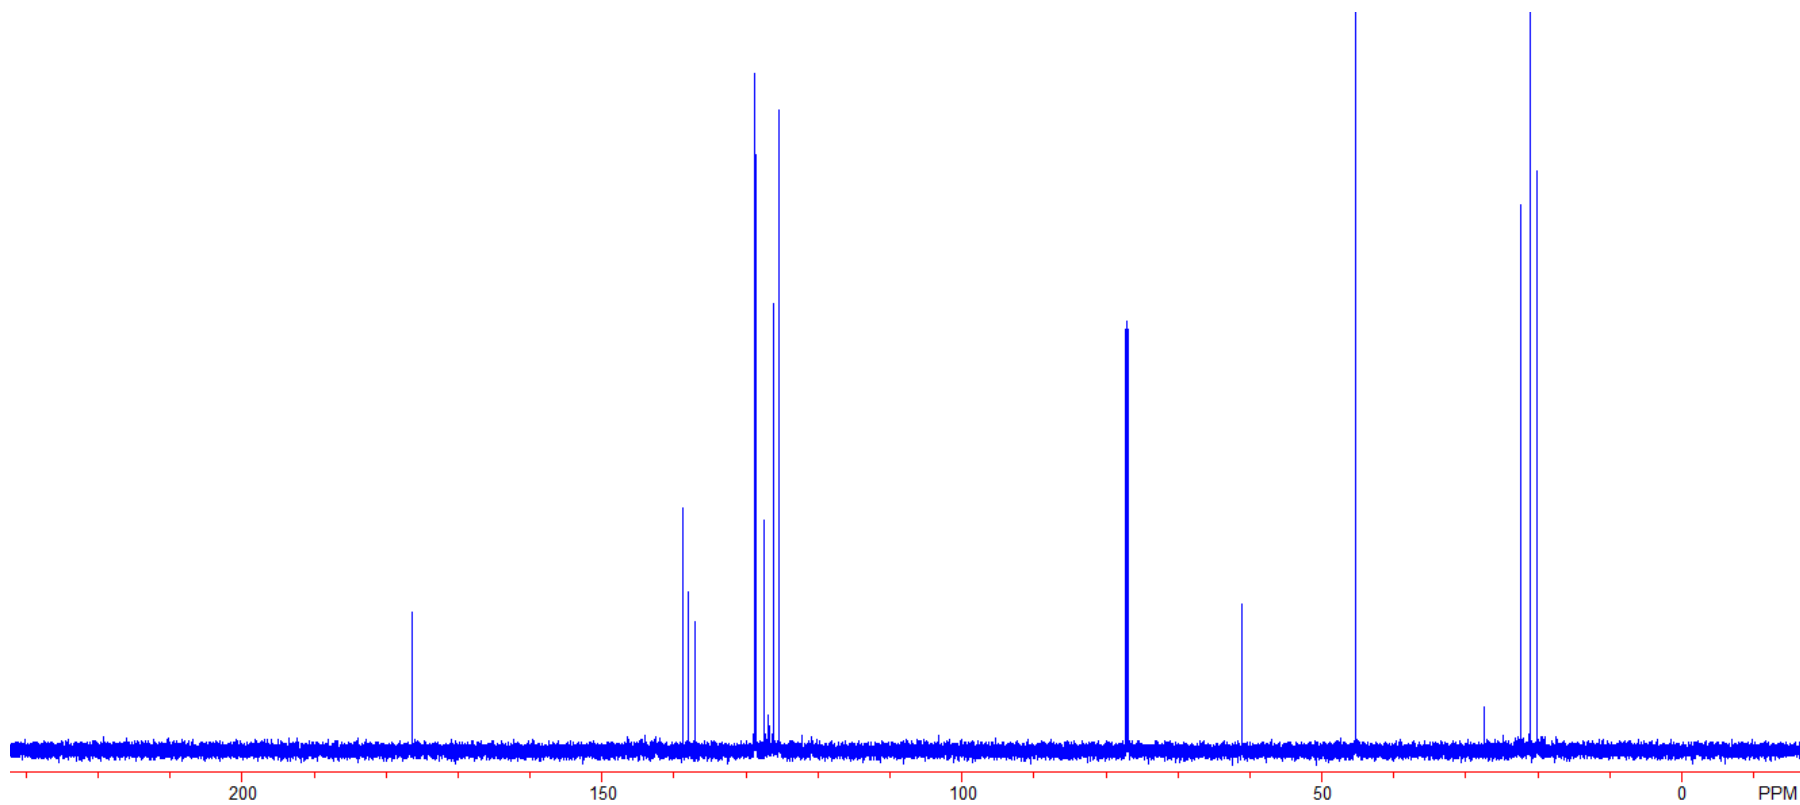

$^{13}\text{C}$  NMR Spectrum in  $\text{CDCl}_3$



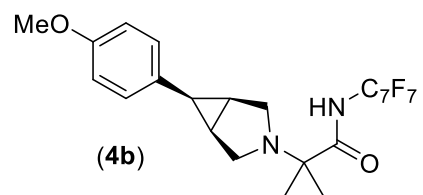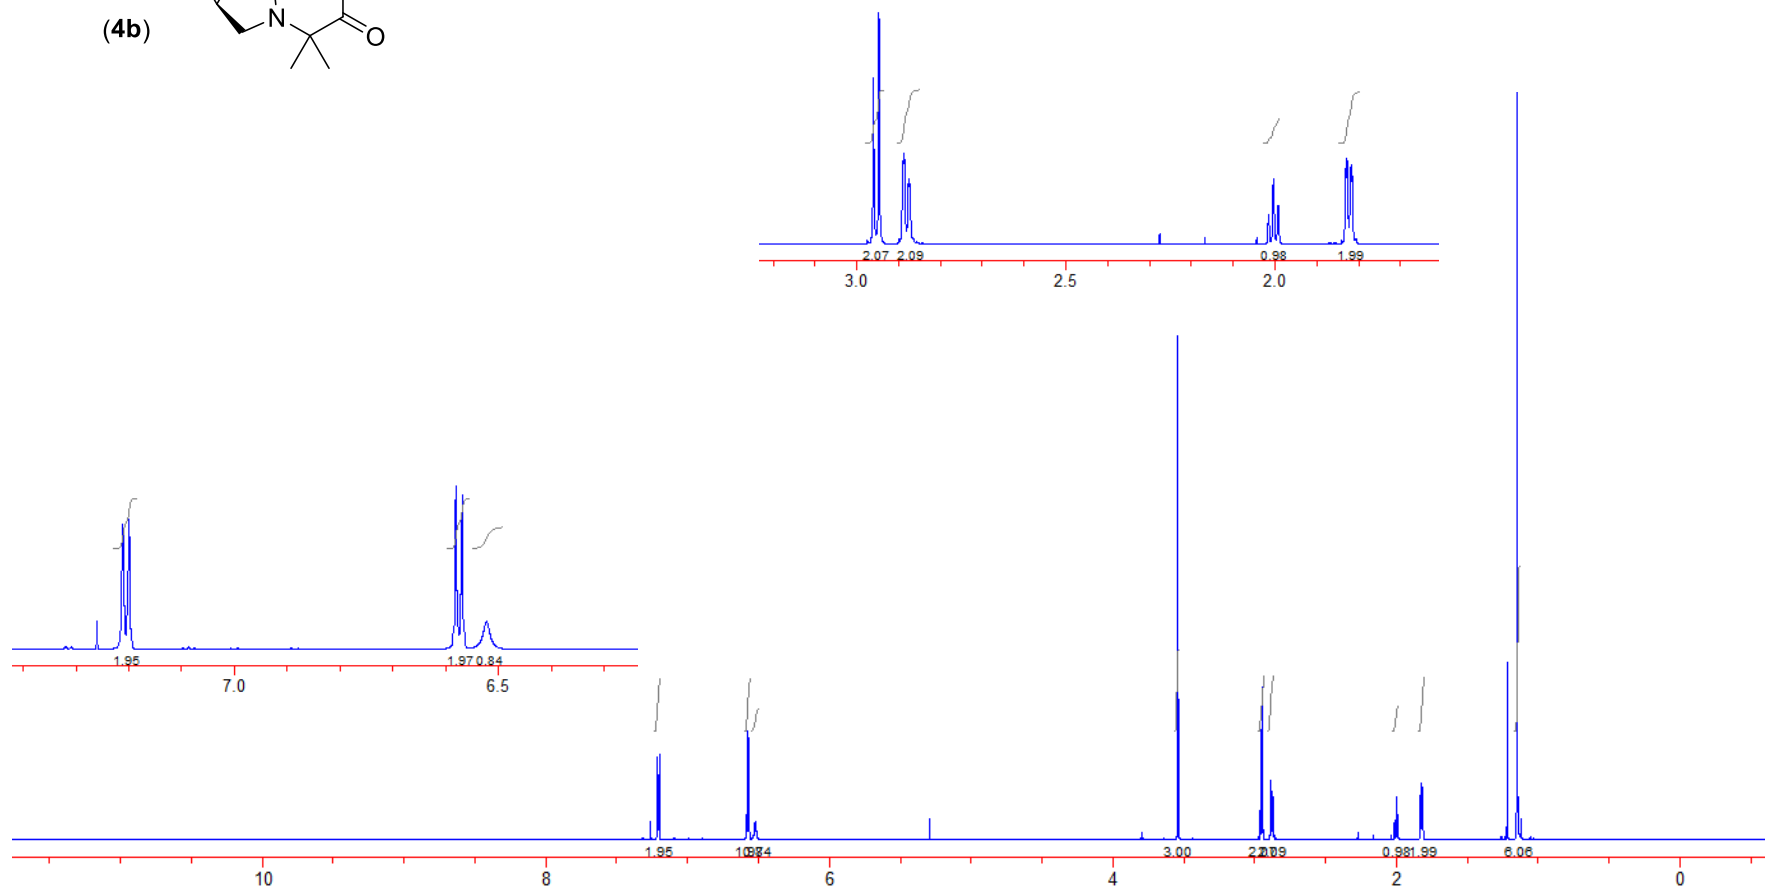

<sup>1</sup>H NMR Spectrum in CDCl<sub>3</sub>

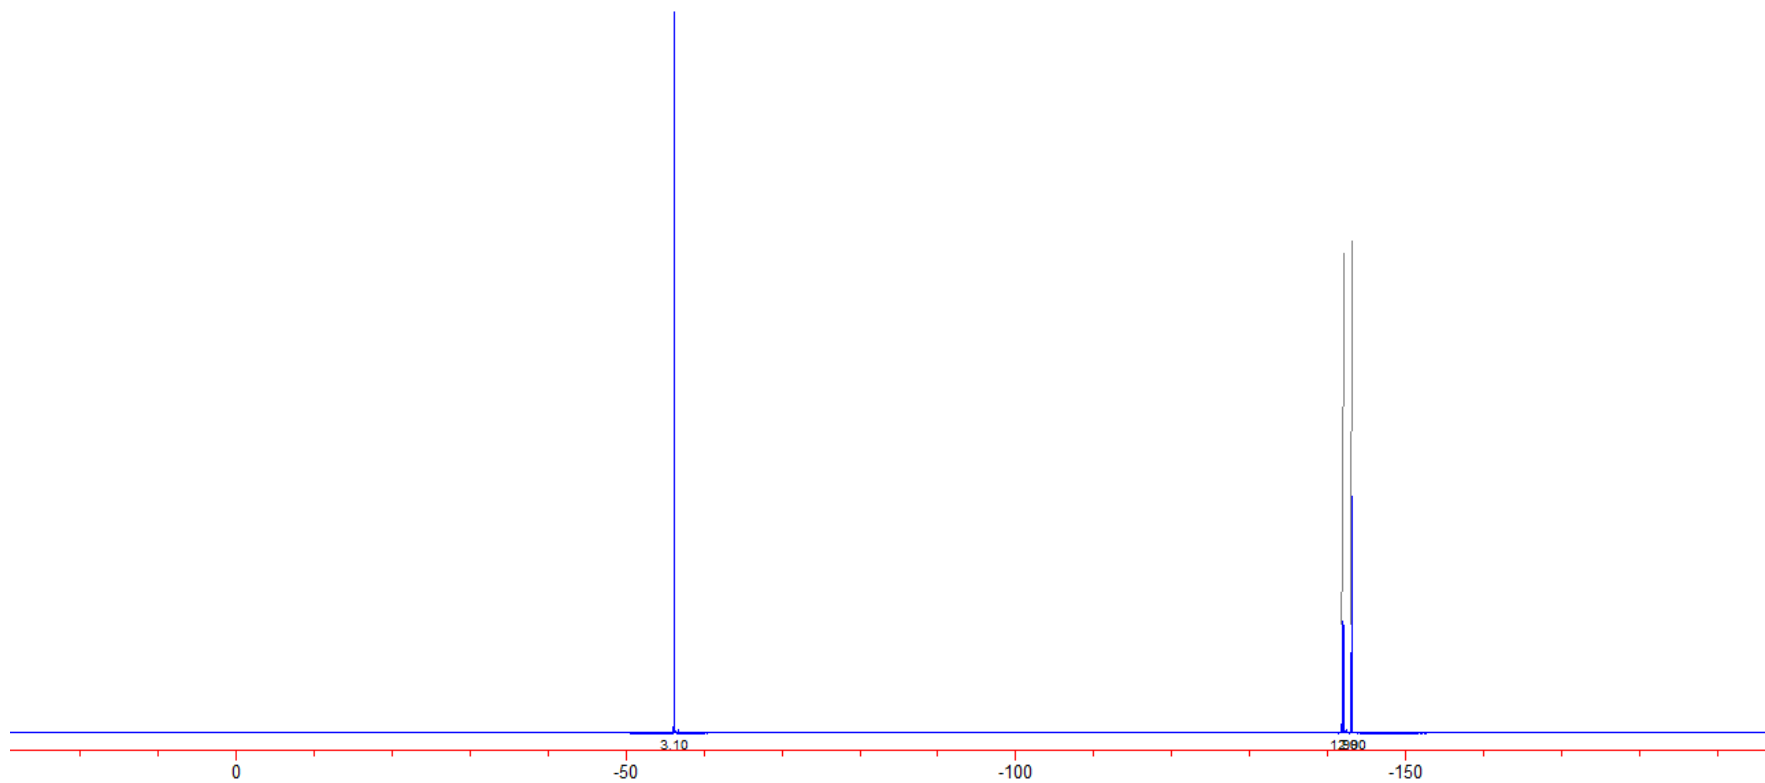

<sup>19</sup>F NMR Spectrum in CDCl<sub>3</sub>

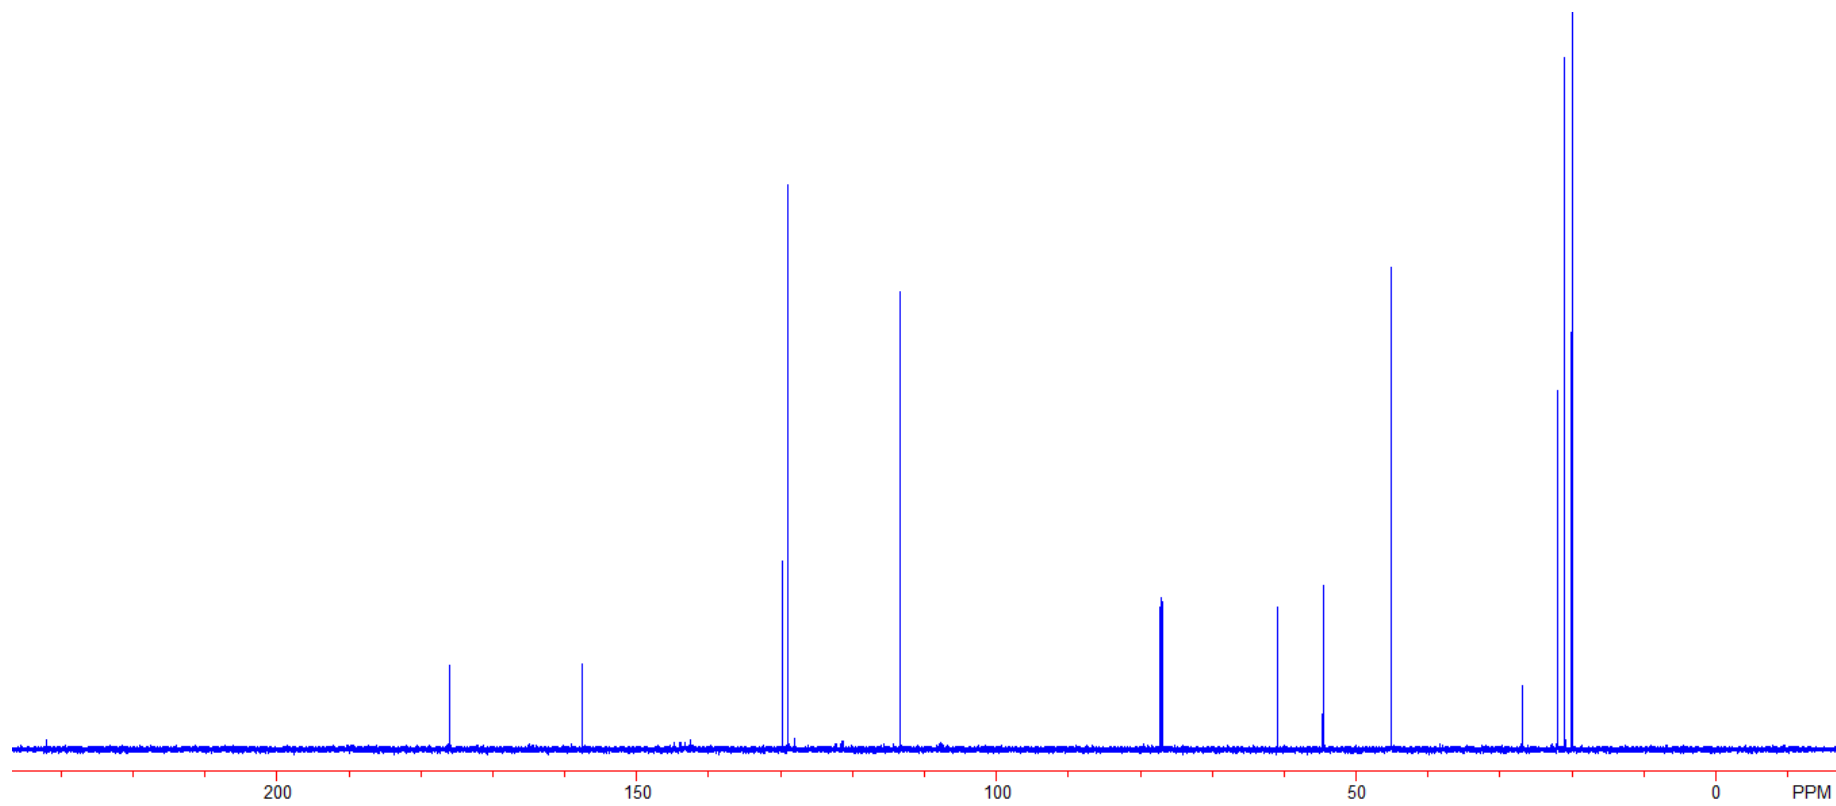

<sup>13</sup>C NMR Spectrum in CDCl<sub>3</sub>

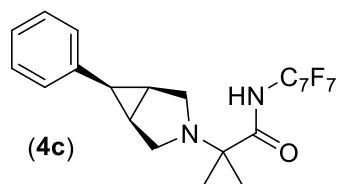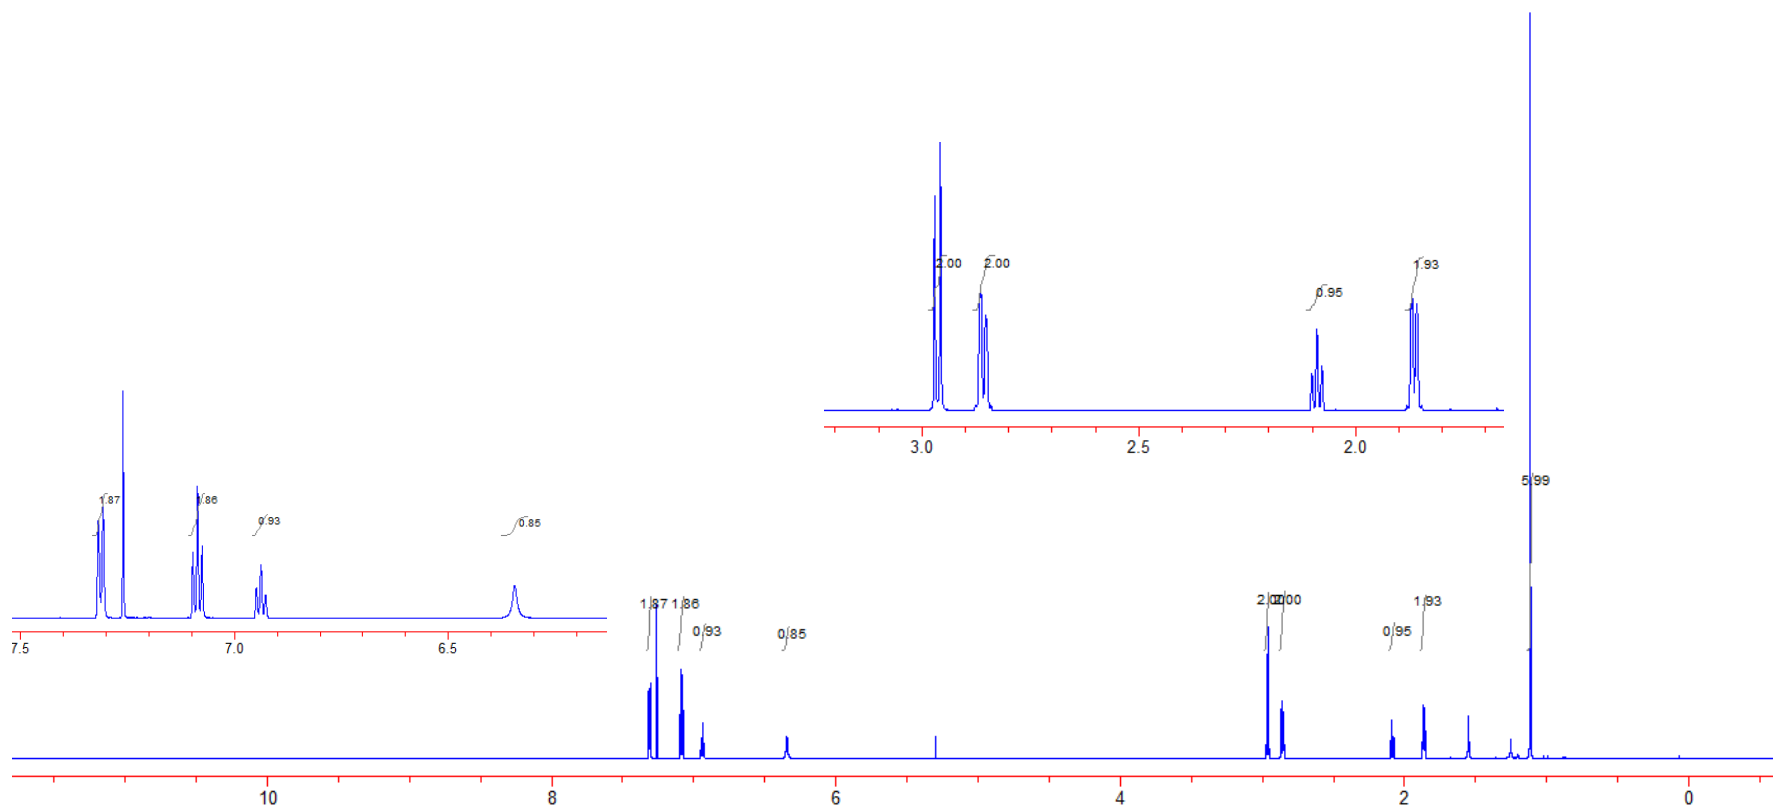

$^1\text{H}$  NMR Spectrum in  $\text{CDCl}_3$

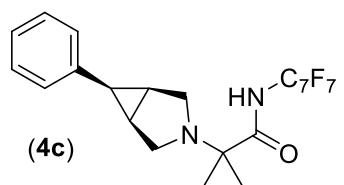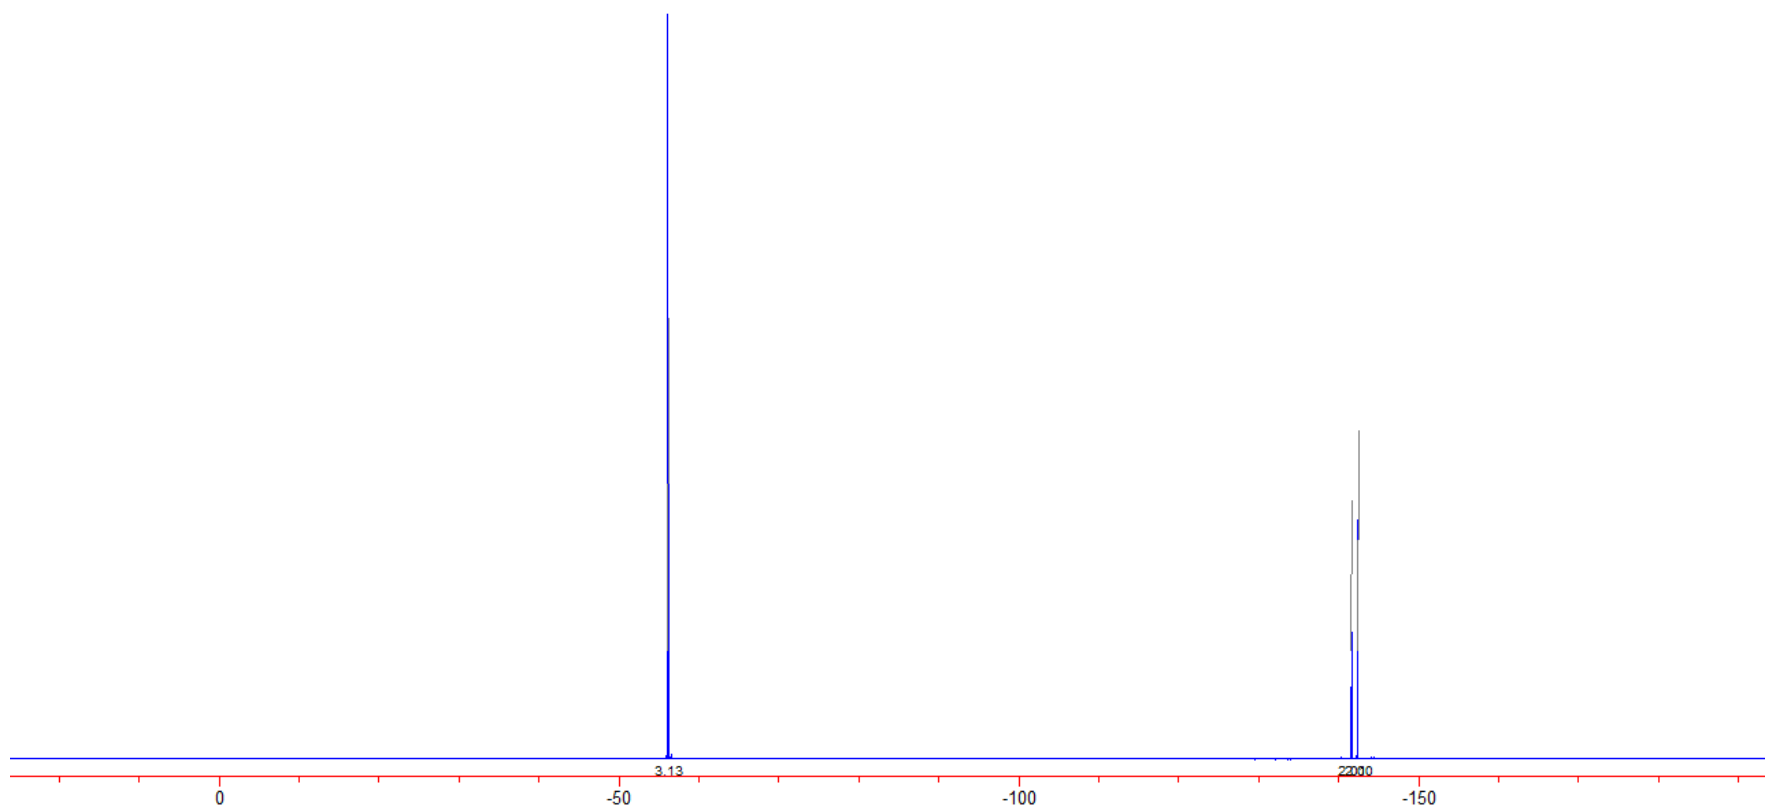

<sup>19</sup>F NMR Spectrum in CDCl<sub>3</sub>

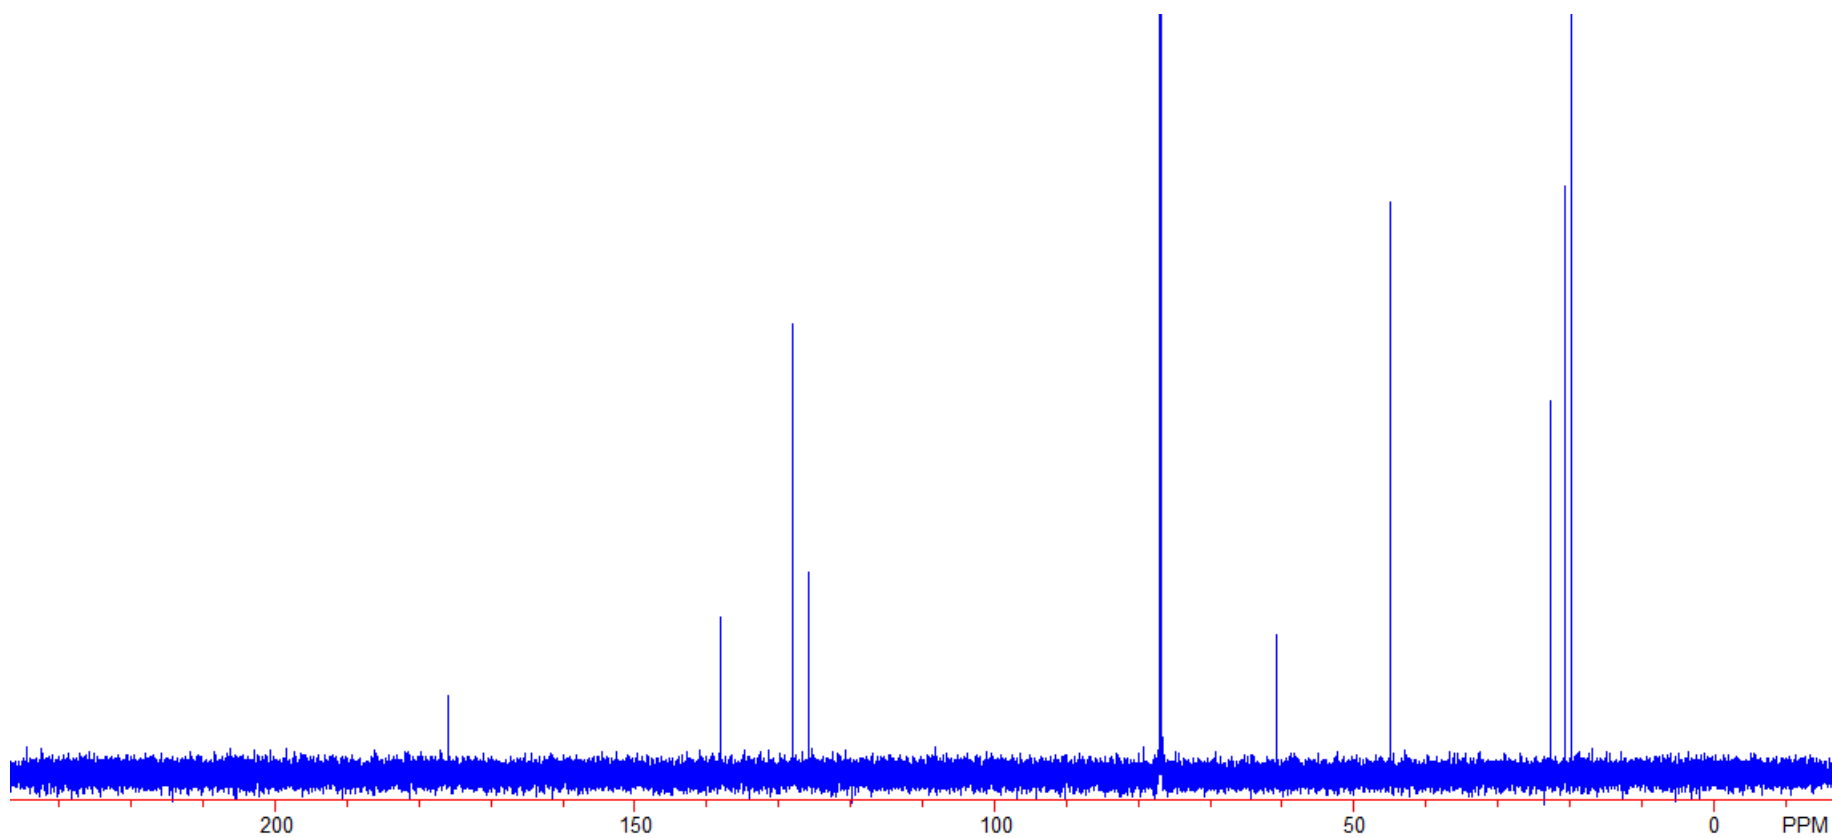

<sup>13</sup>C NMR Spectrum in CDCl<sub>3</sub>

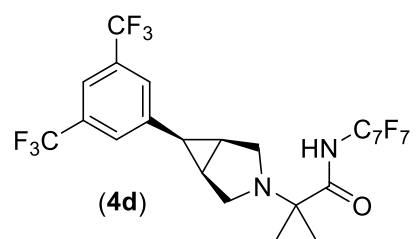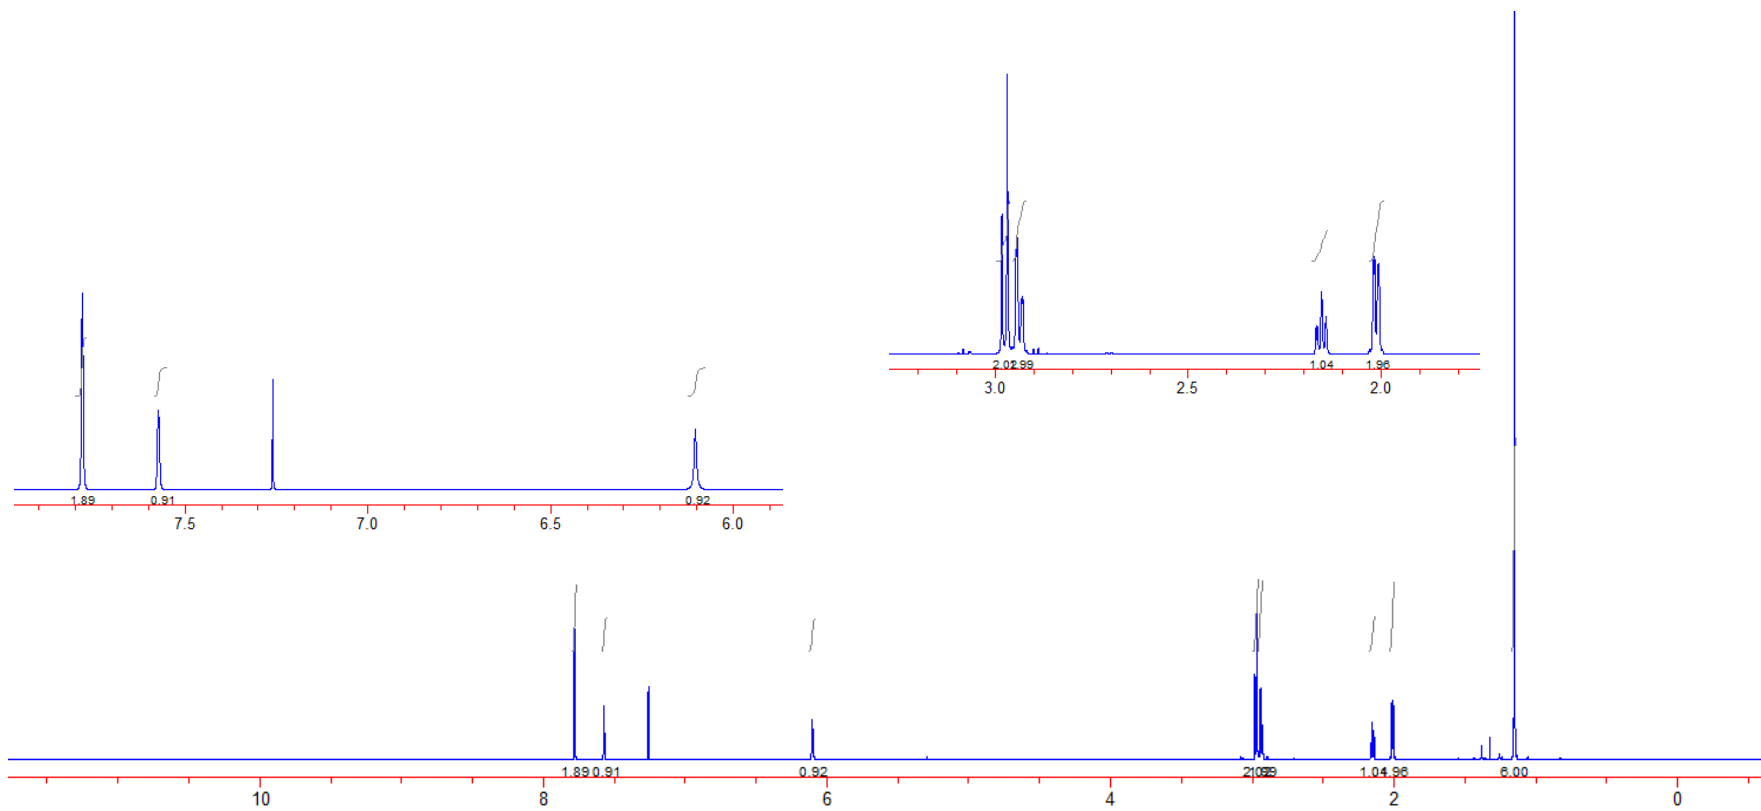

$^1\text{H}$  NMR Spectrum in  $\text{CDCl}_3$

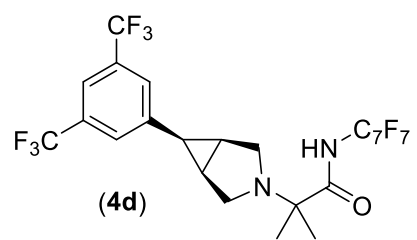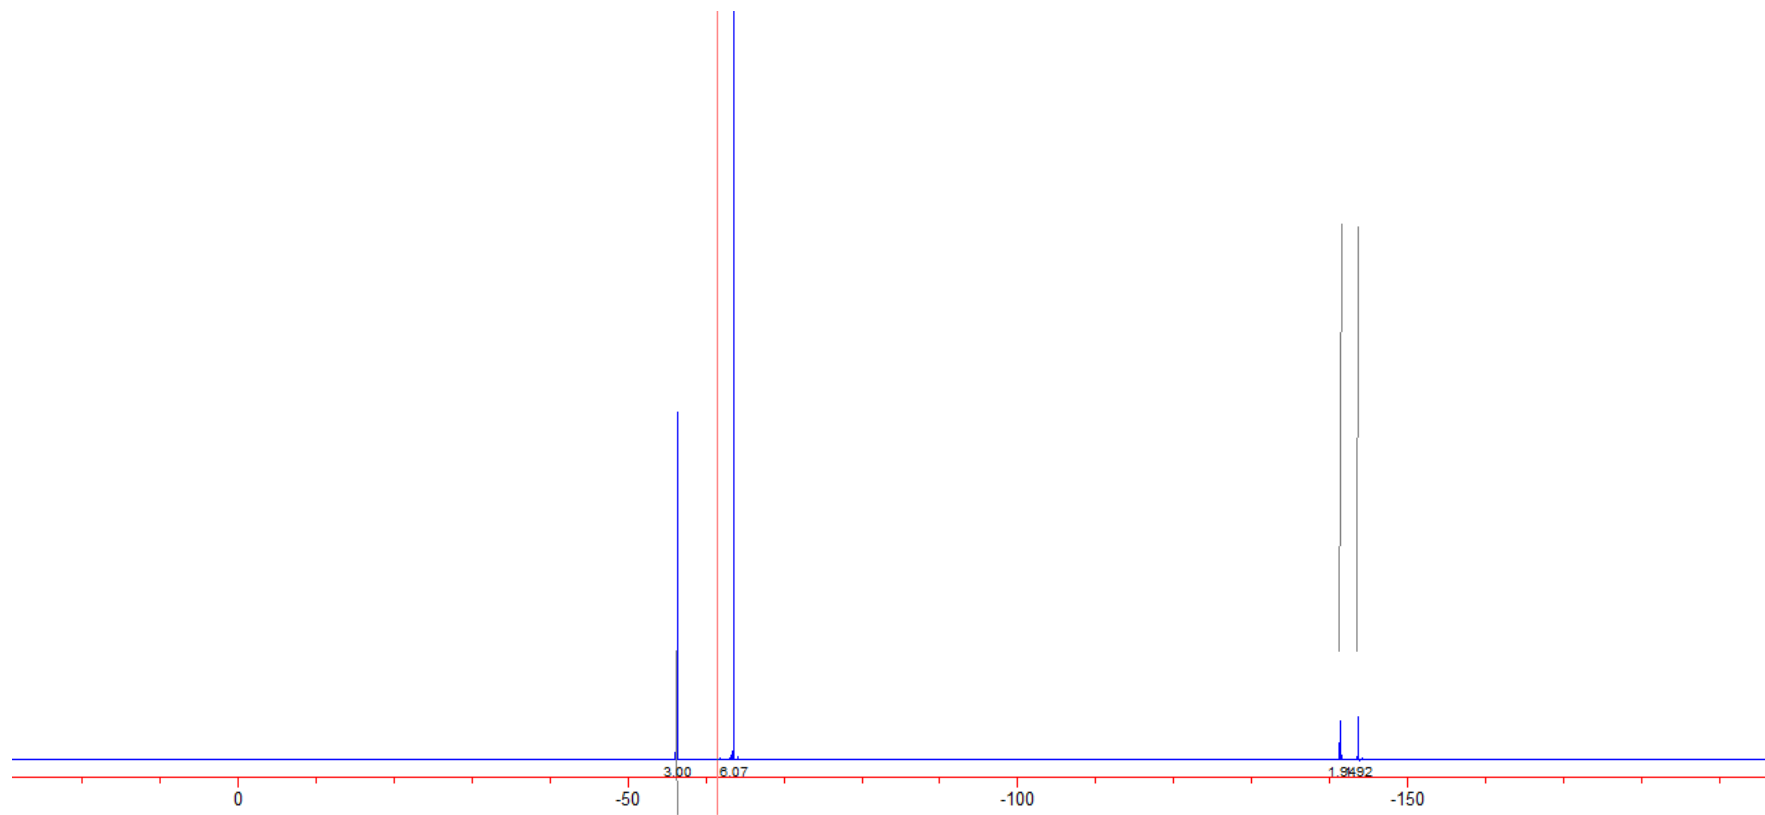

$^{19}\text{F}$  NMR Spectrum in  $\text{CDCl}_3$



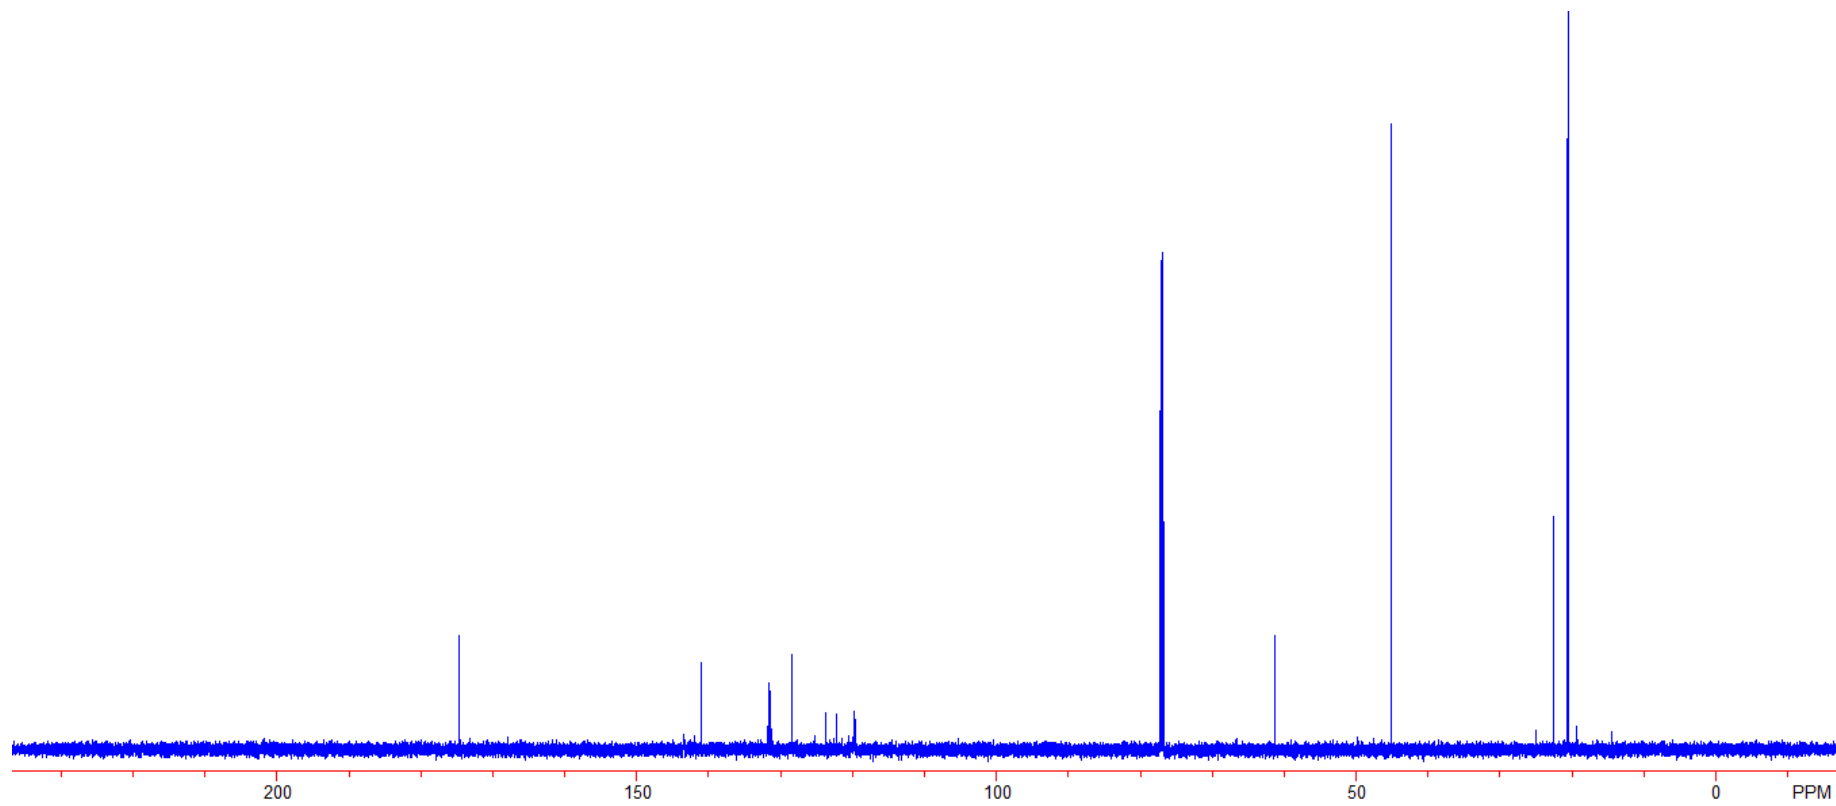

13C NMR Spectrum in CDCl<sub>3</sub>

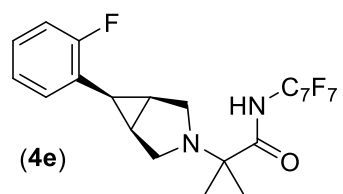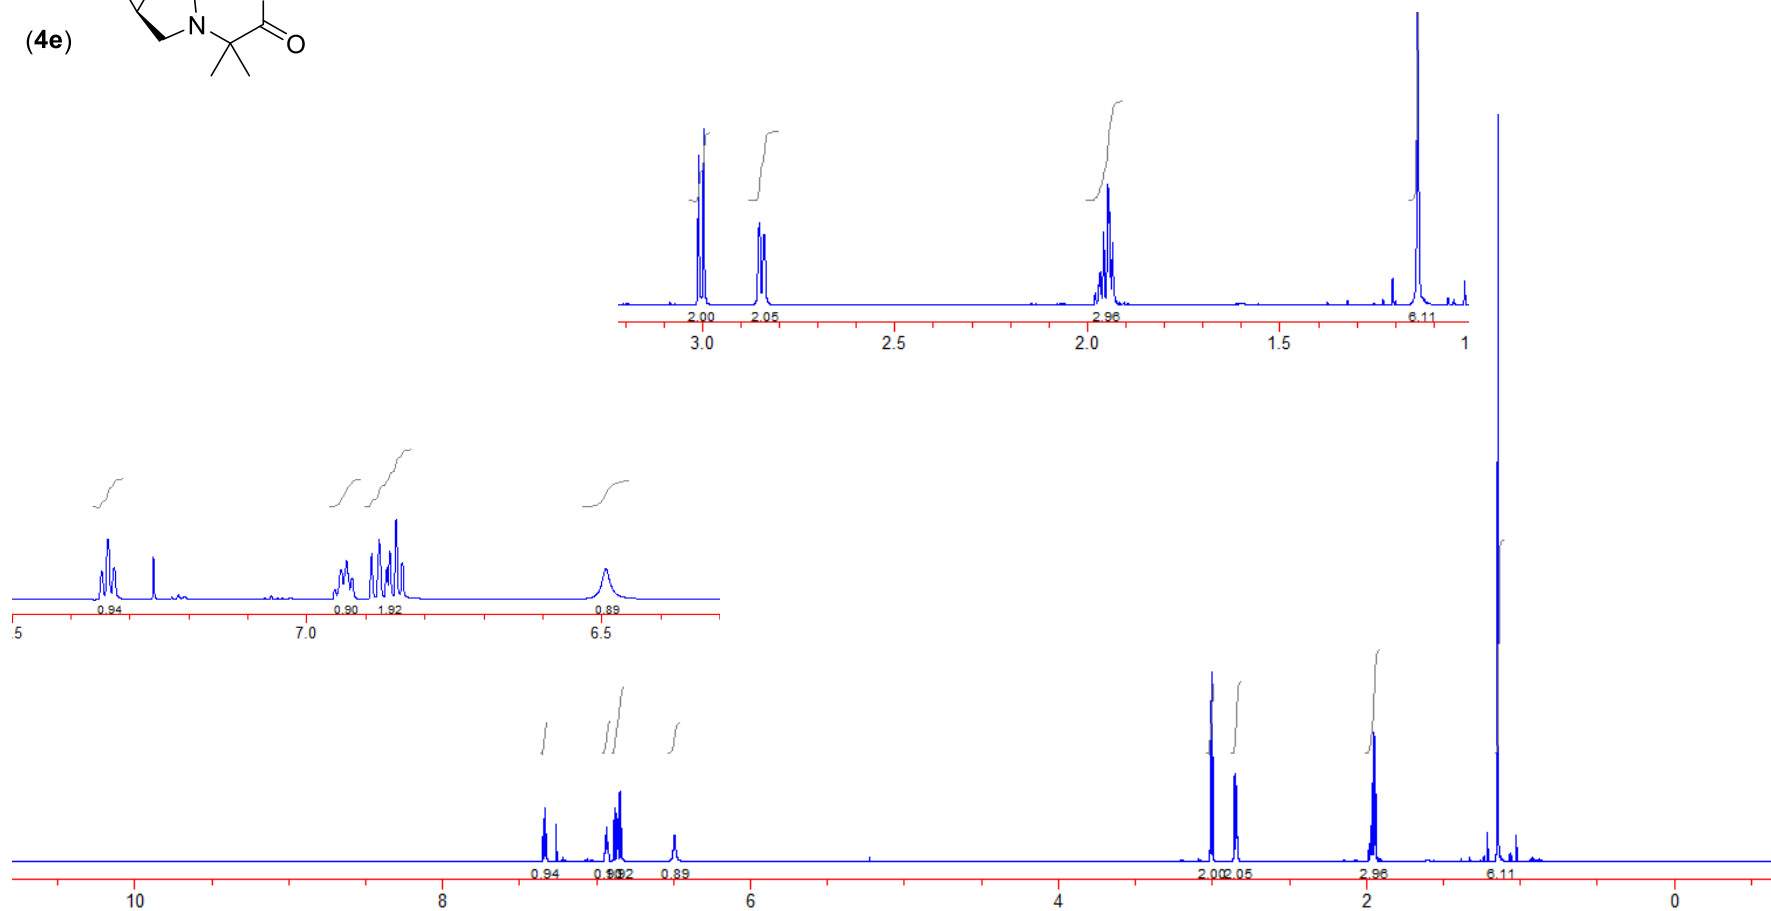

<sup>1</sup>H NMR Spectrum in CDCl<sub>3</sub>

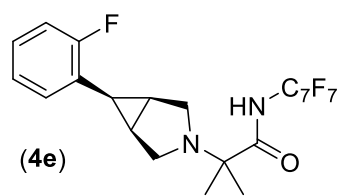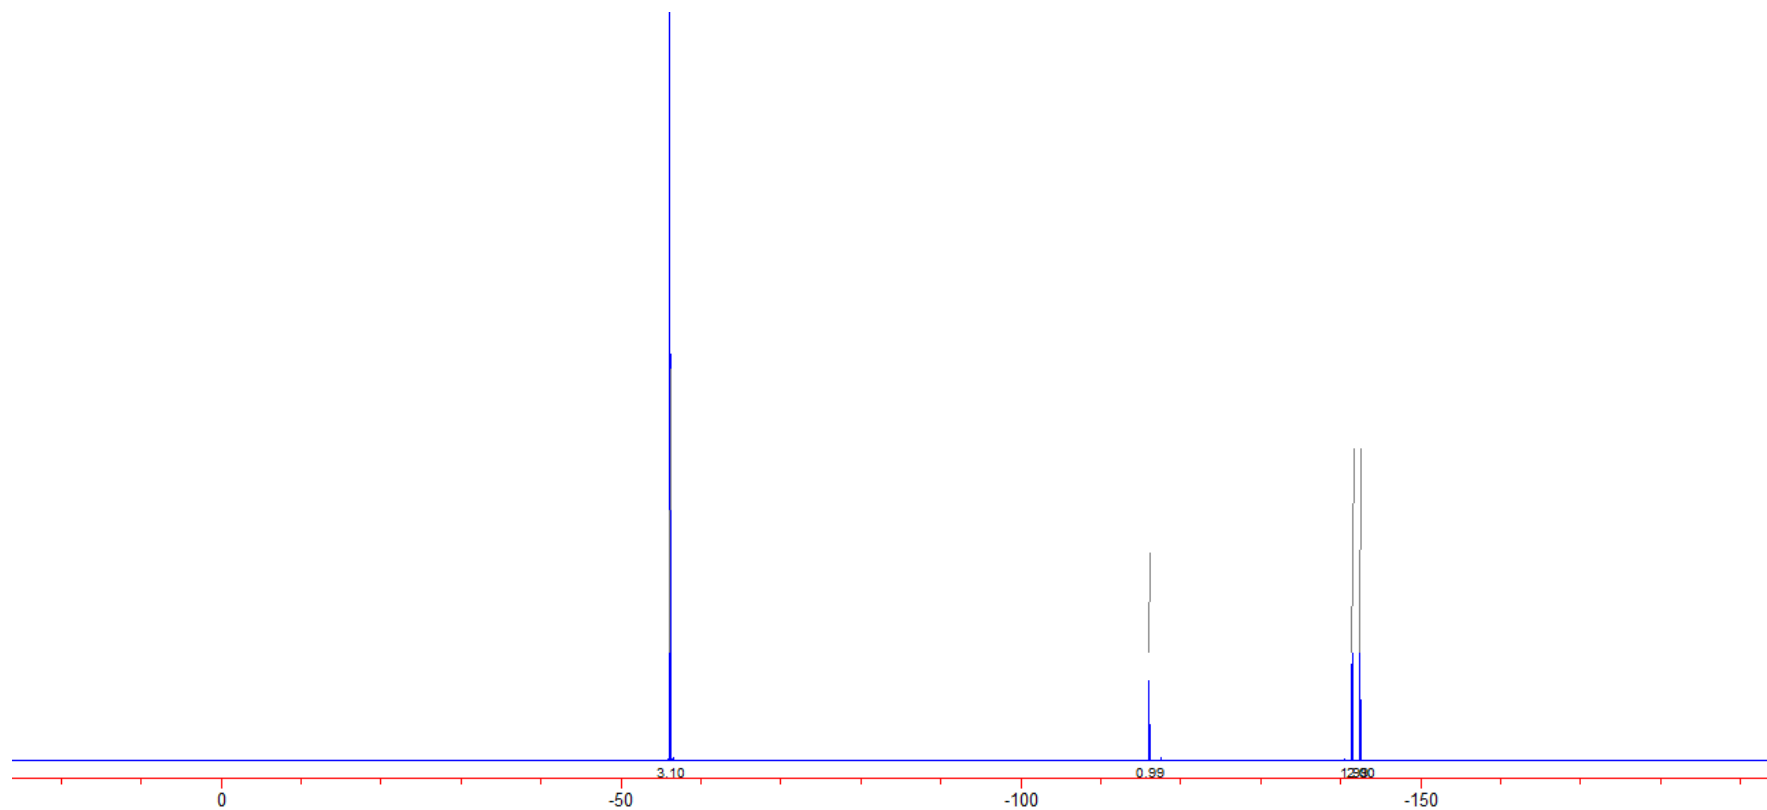

<sup>19</sup>F NMR Spectrum in CDCl<sub>3</sub>

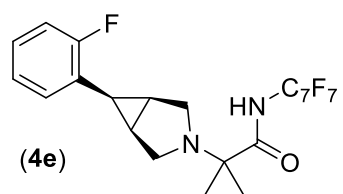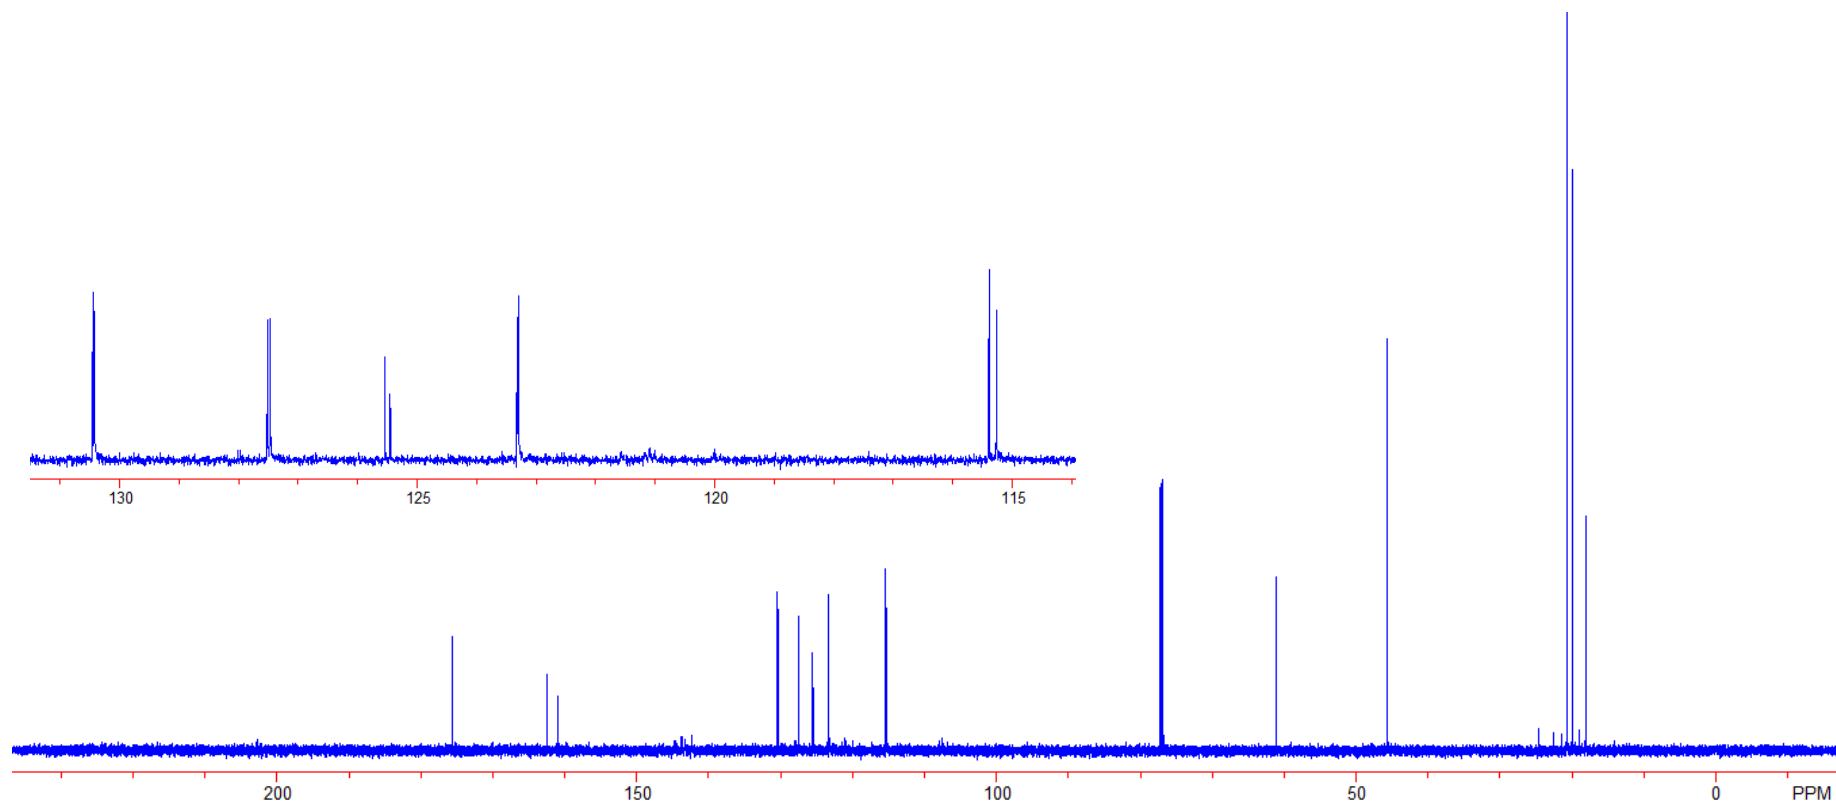

<sup>13</sup>C NMR Spectrum in CDCl<sub>3</sub>

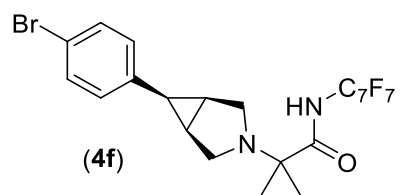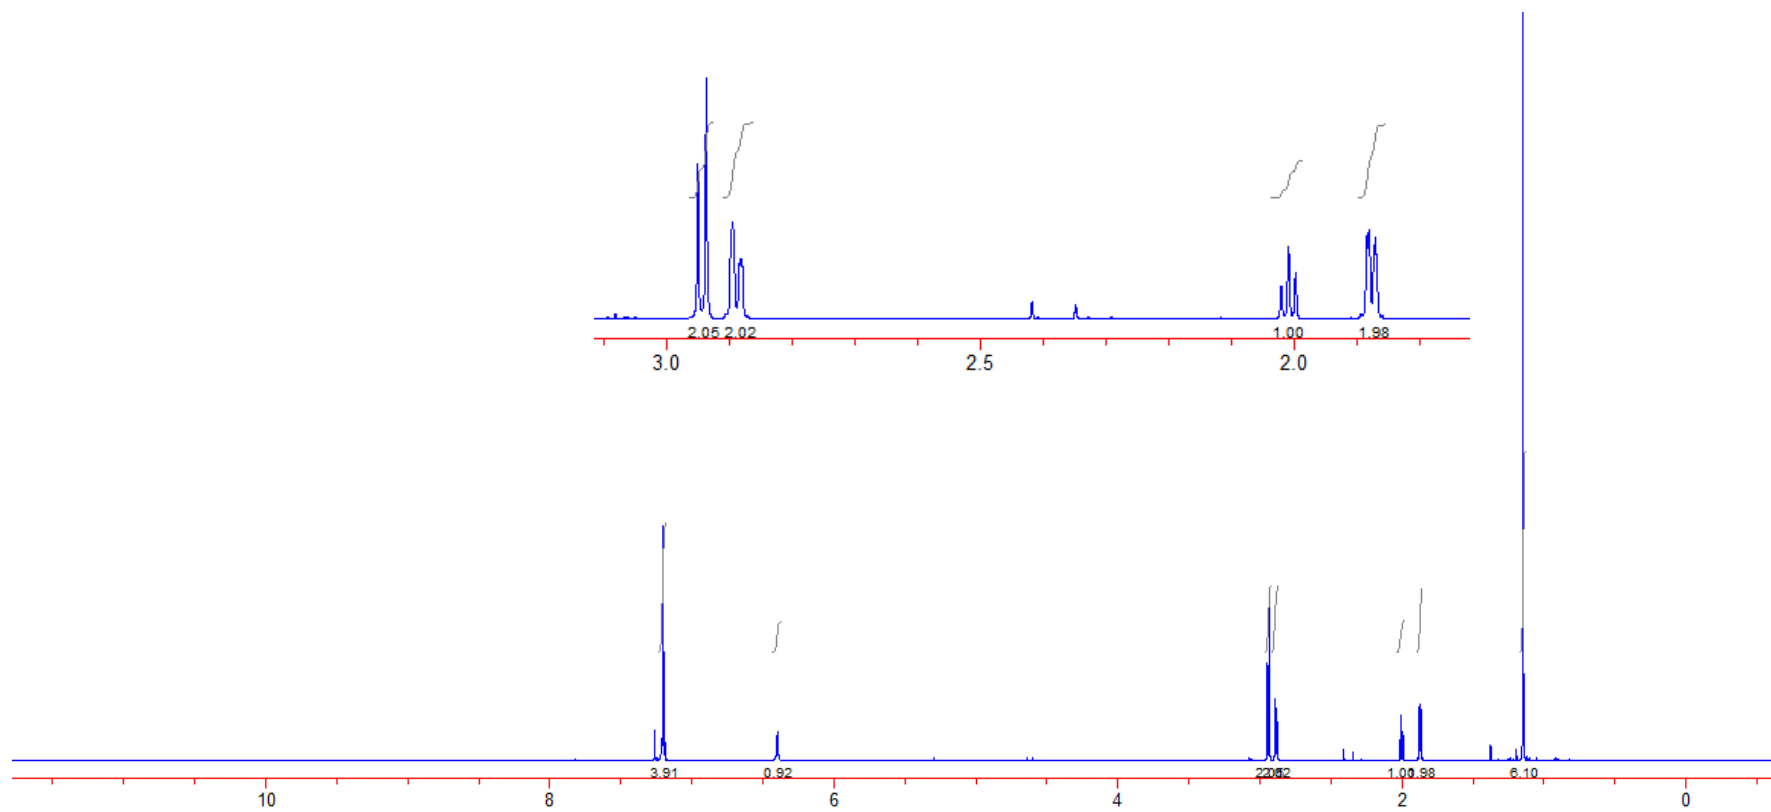

<sup>1</sup>H NMR Spectrum in CDCl<sub>3</sub>

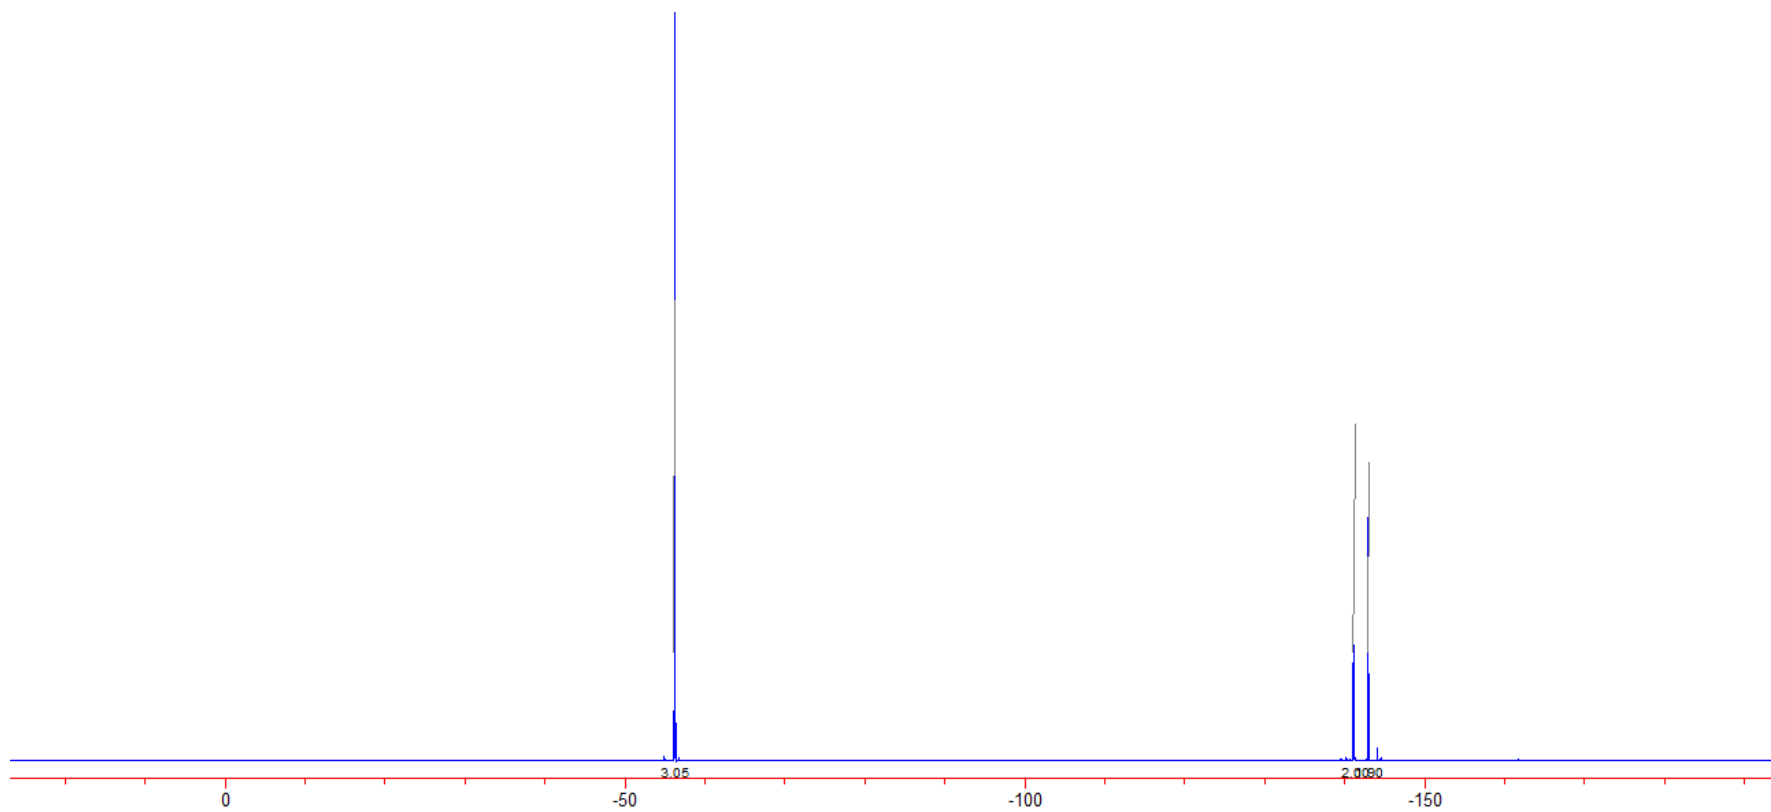

$^{19}\text{F}$  NMR Spectrum in  $\text{CDCl}_3$

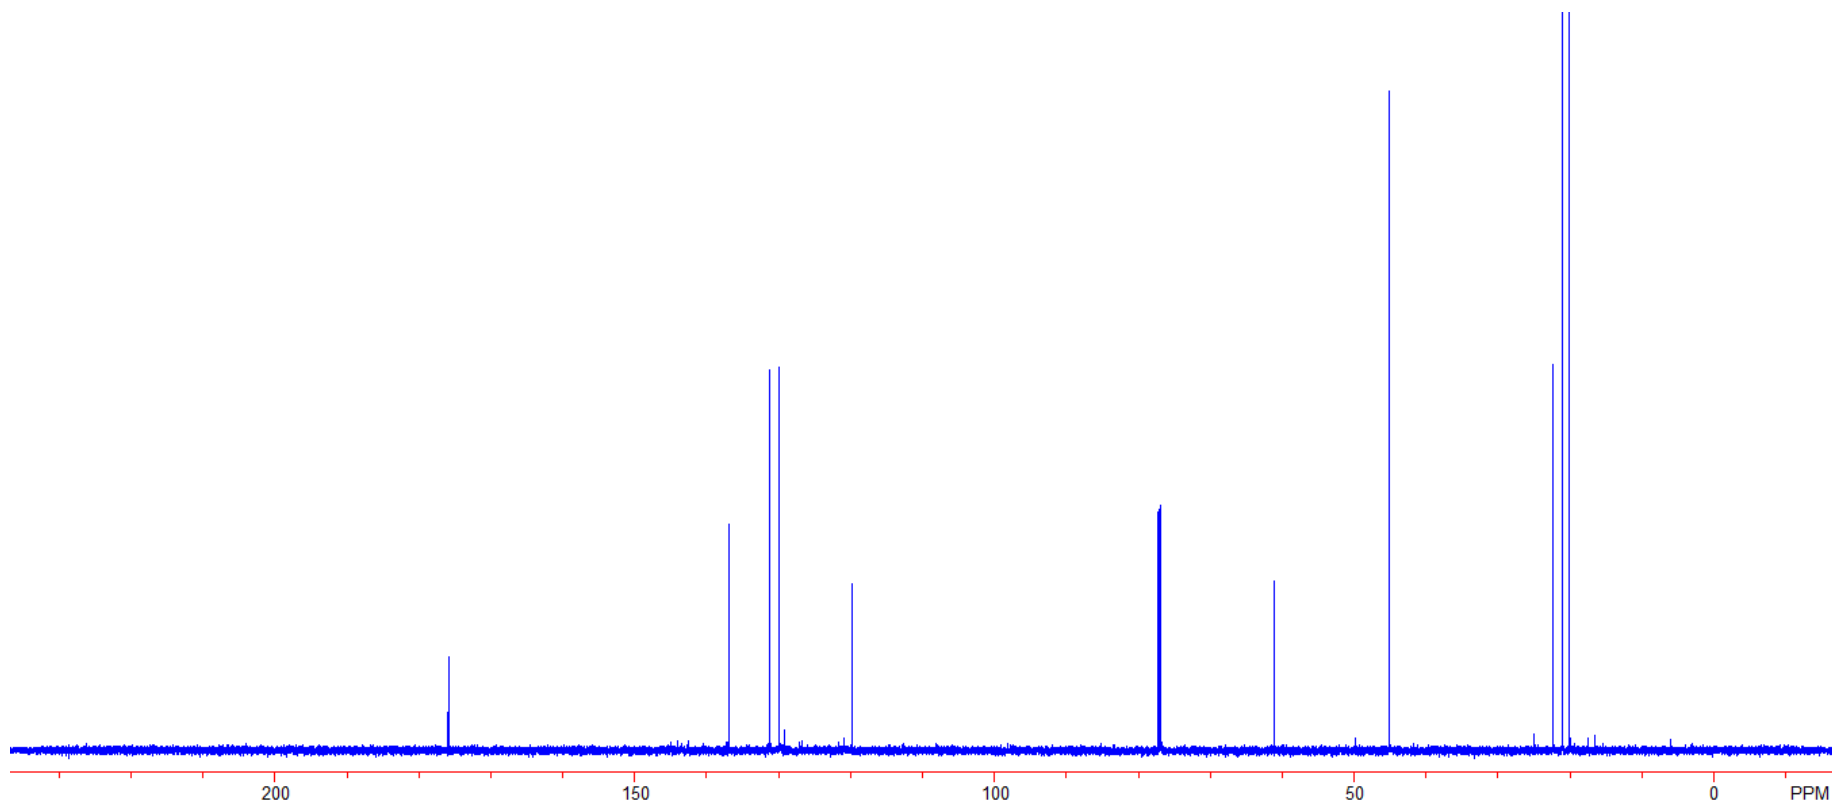

$^{13}\text{C}$  NMR Spectrum in  $\text{CDCl}_3$

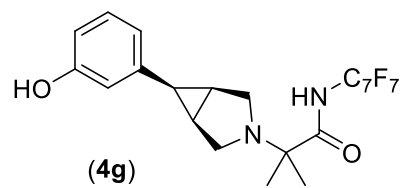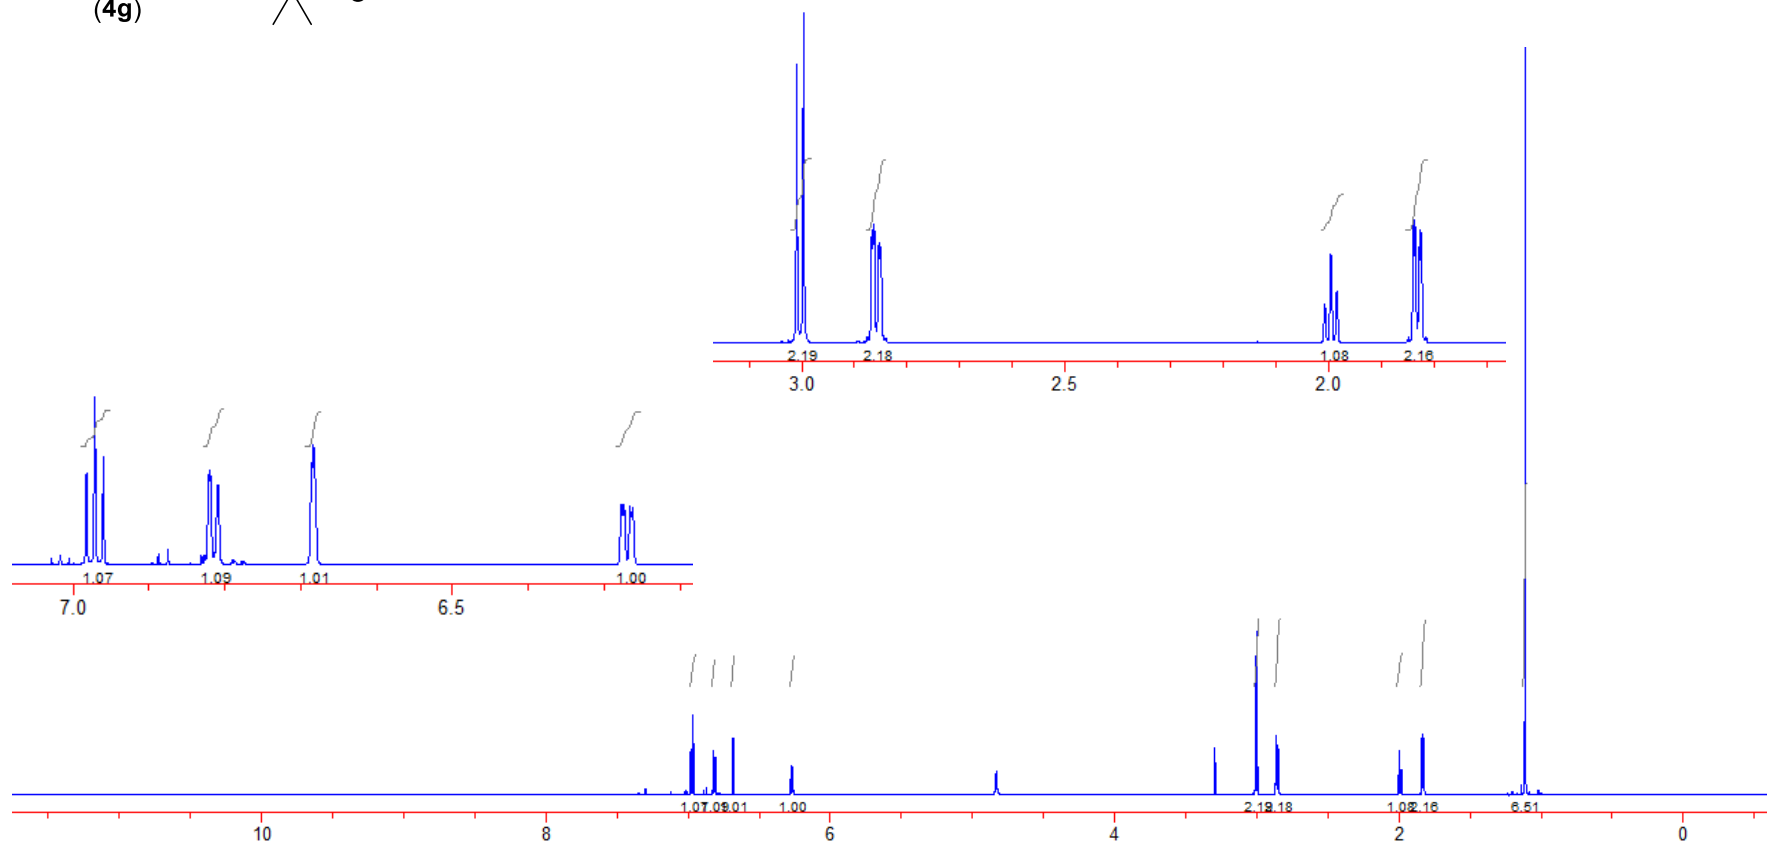

$^1\text{H}$  NMR Spectrum in MeOD



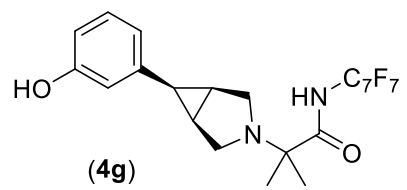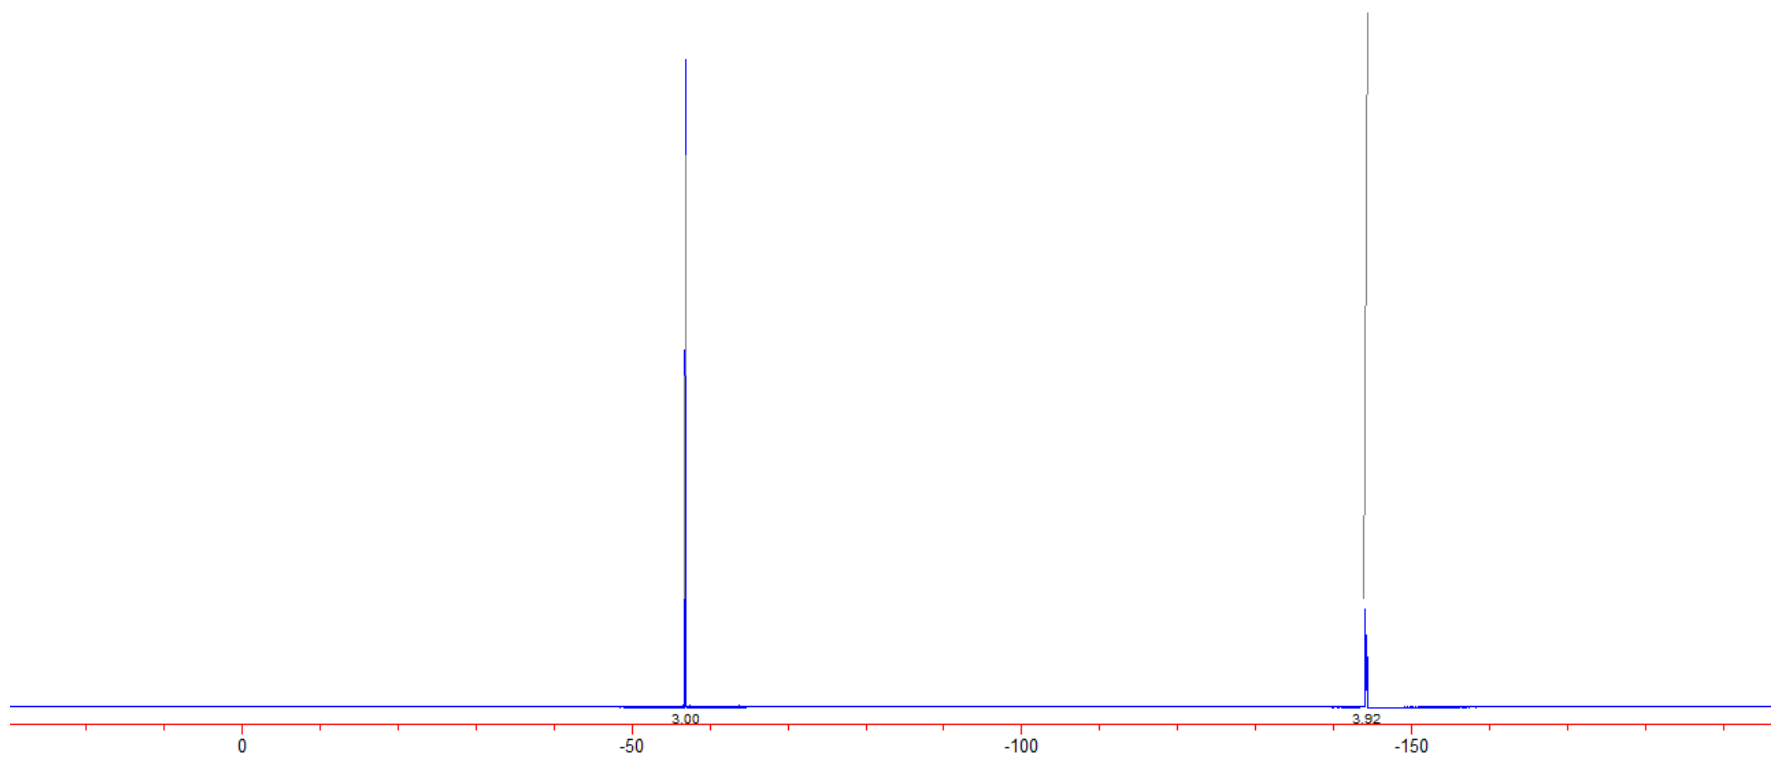

$^{19}\text{F}$  NMR Spectrum in MeOD

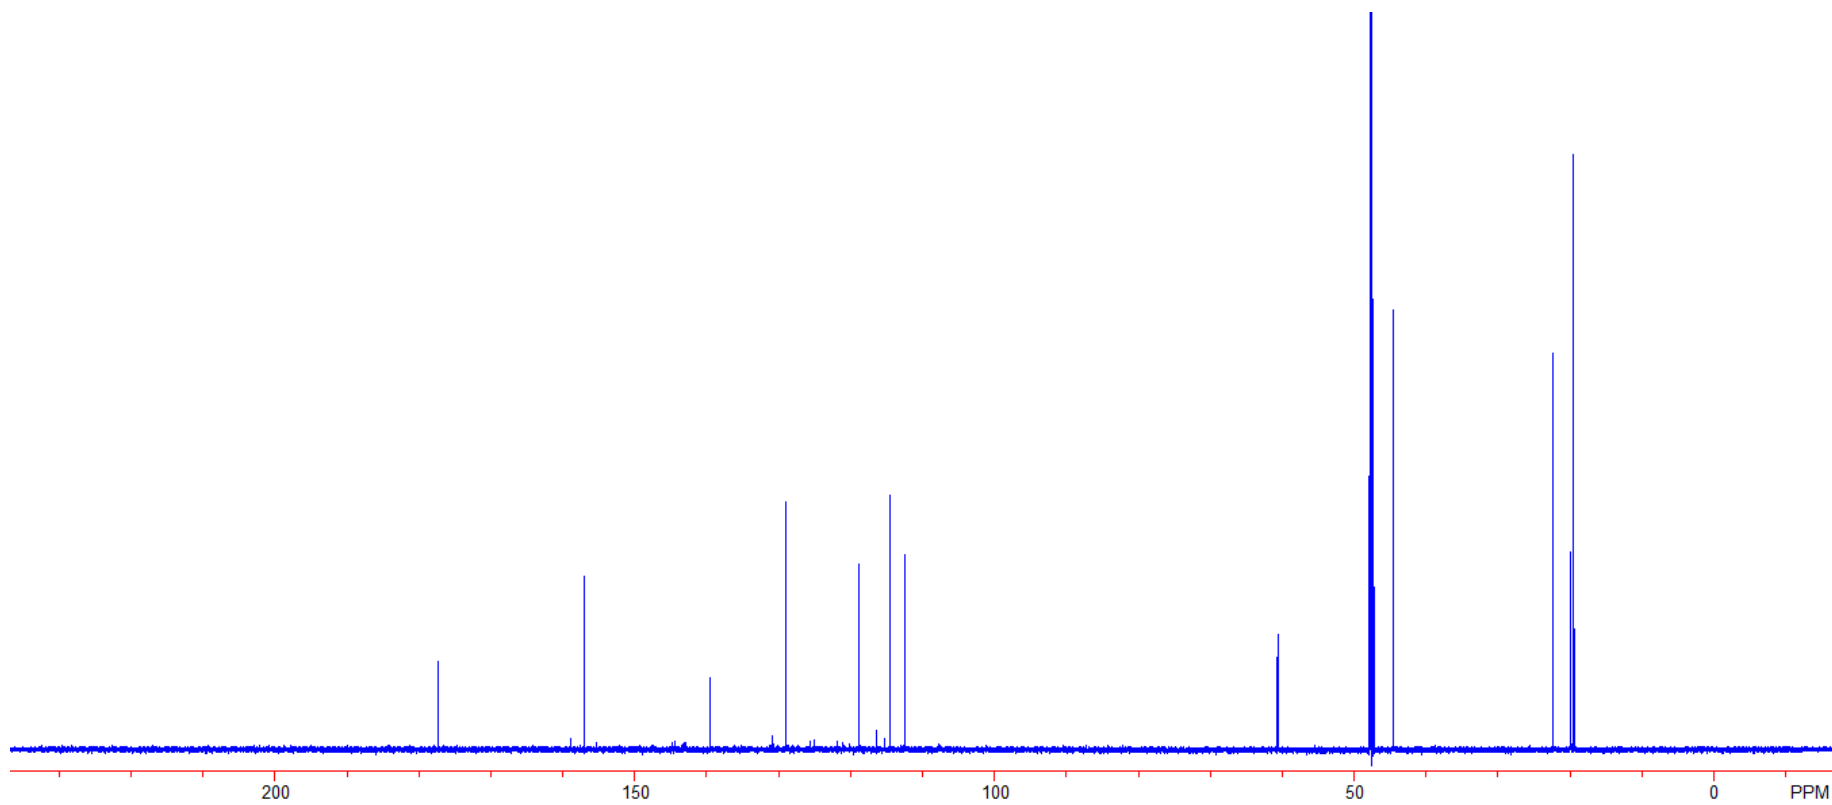

$^{13}\text{C}$  NMR Spectrum in MeOD

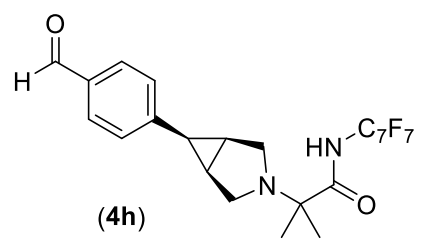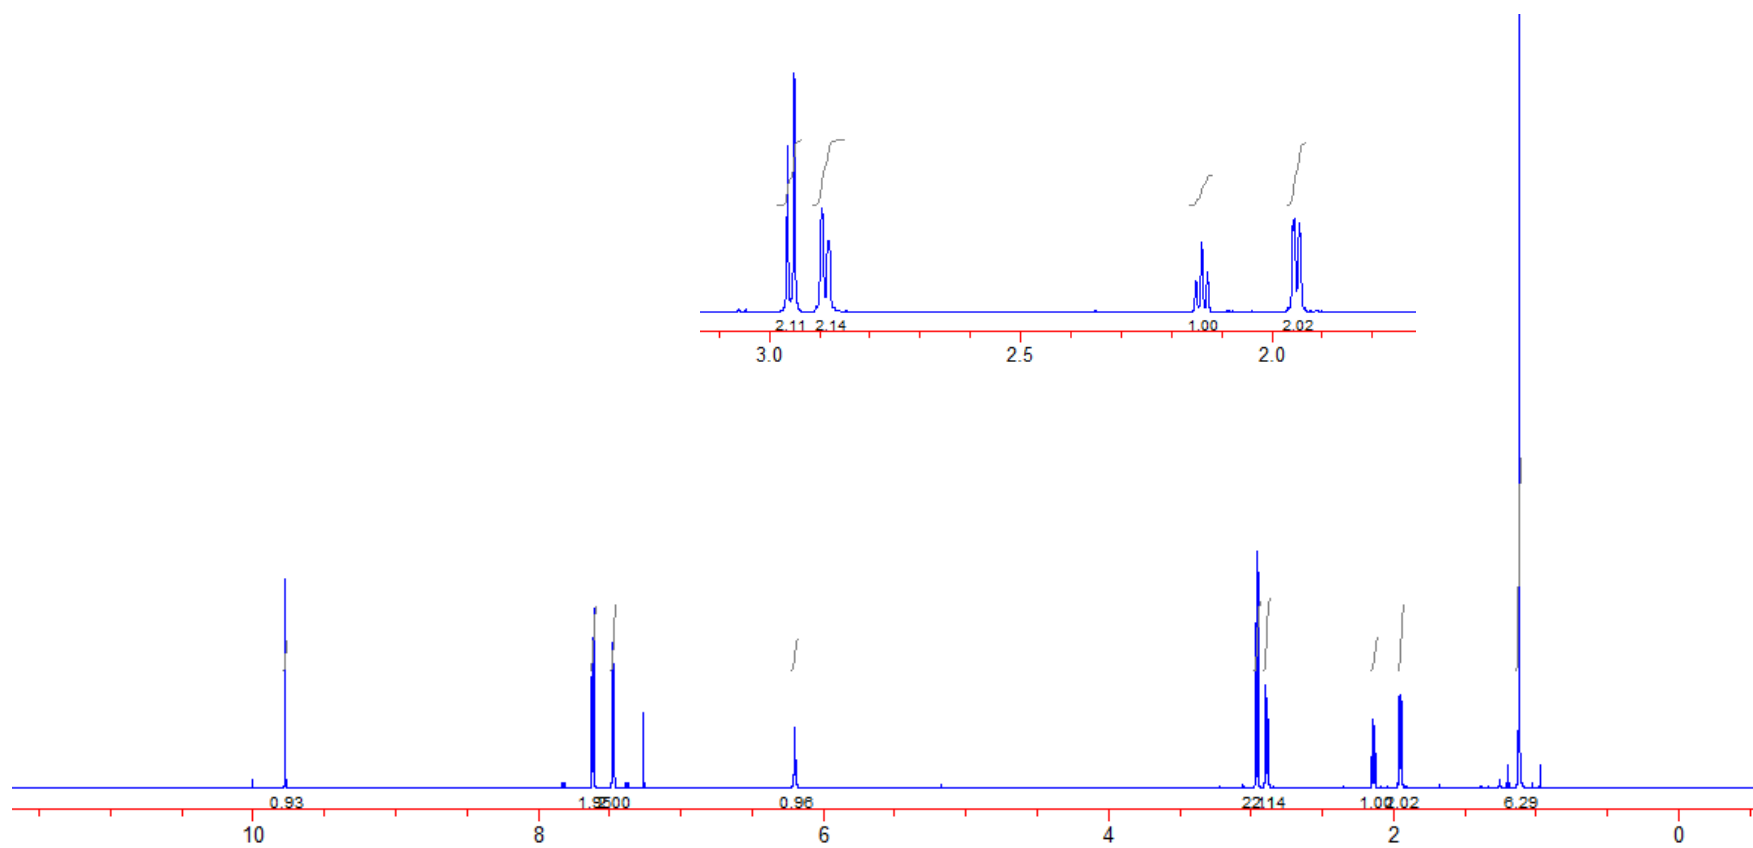

<sup>1</sup>H NMR Spectrum in CDCl<sub>3</sub>

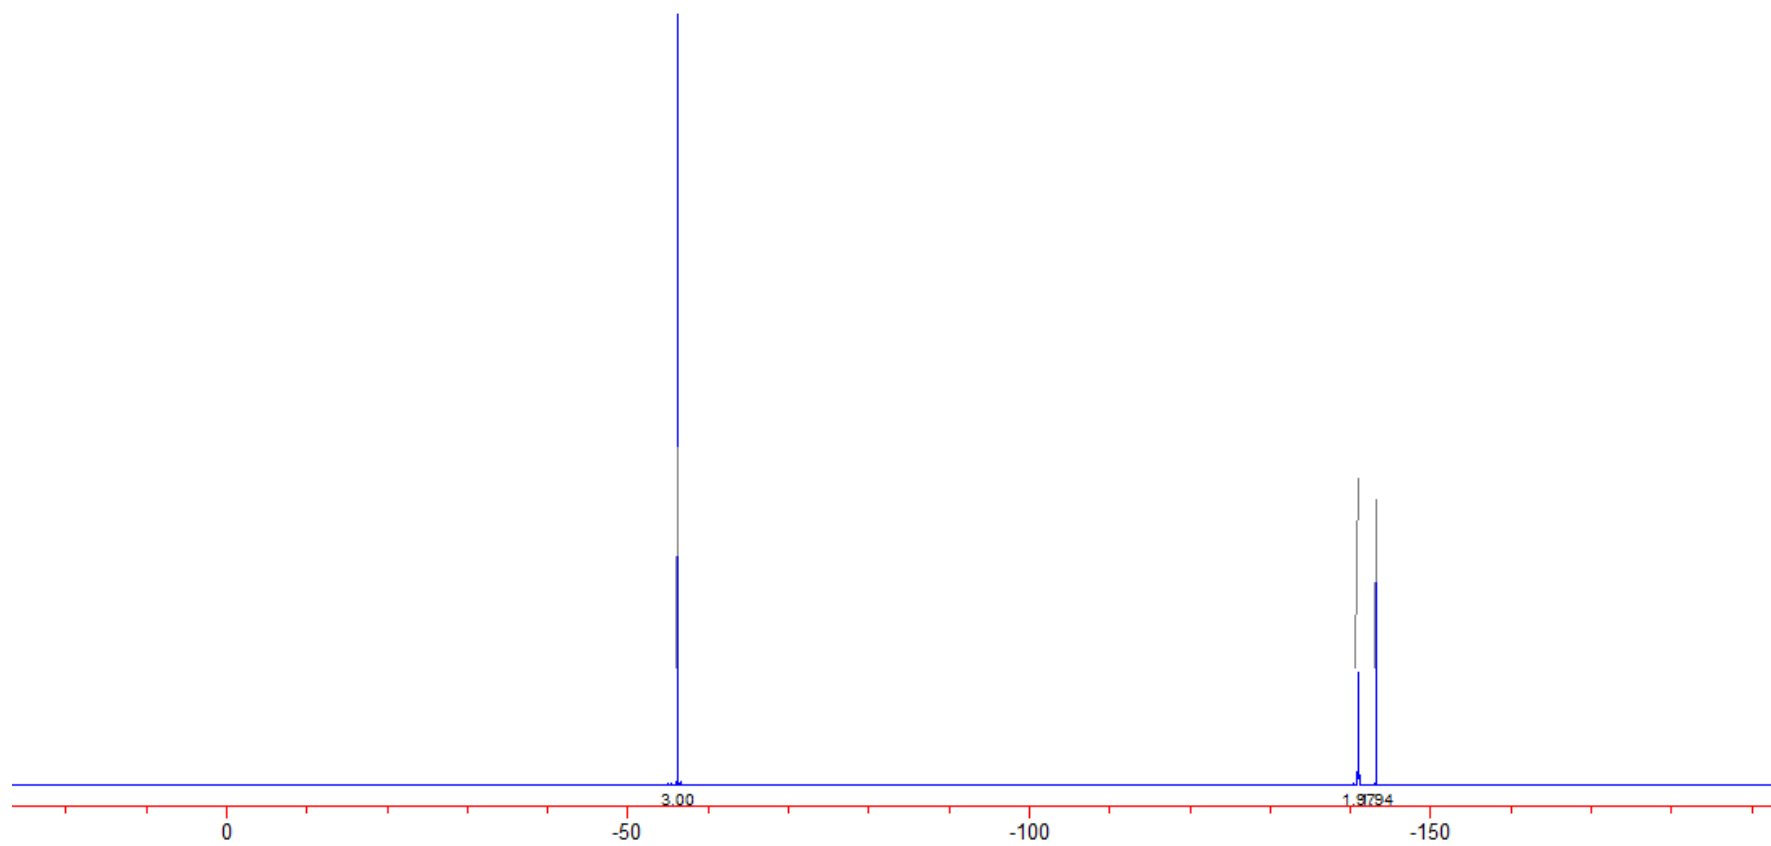

$^{19}\text{F}$  NMR Spectrum in  $\text{CDCl}_3$

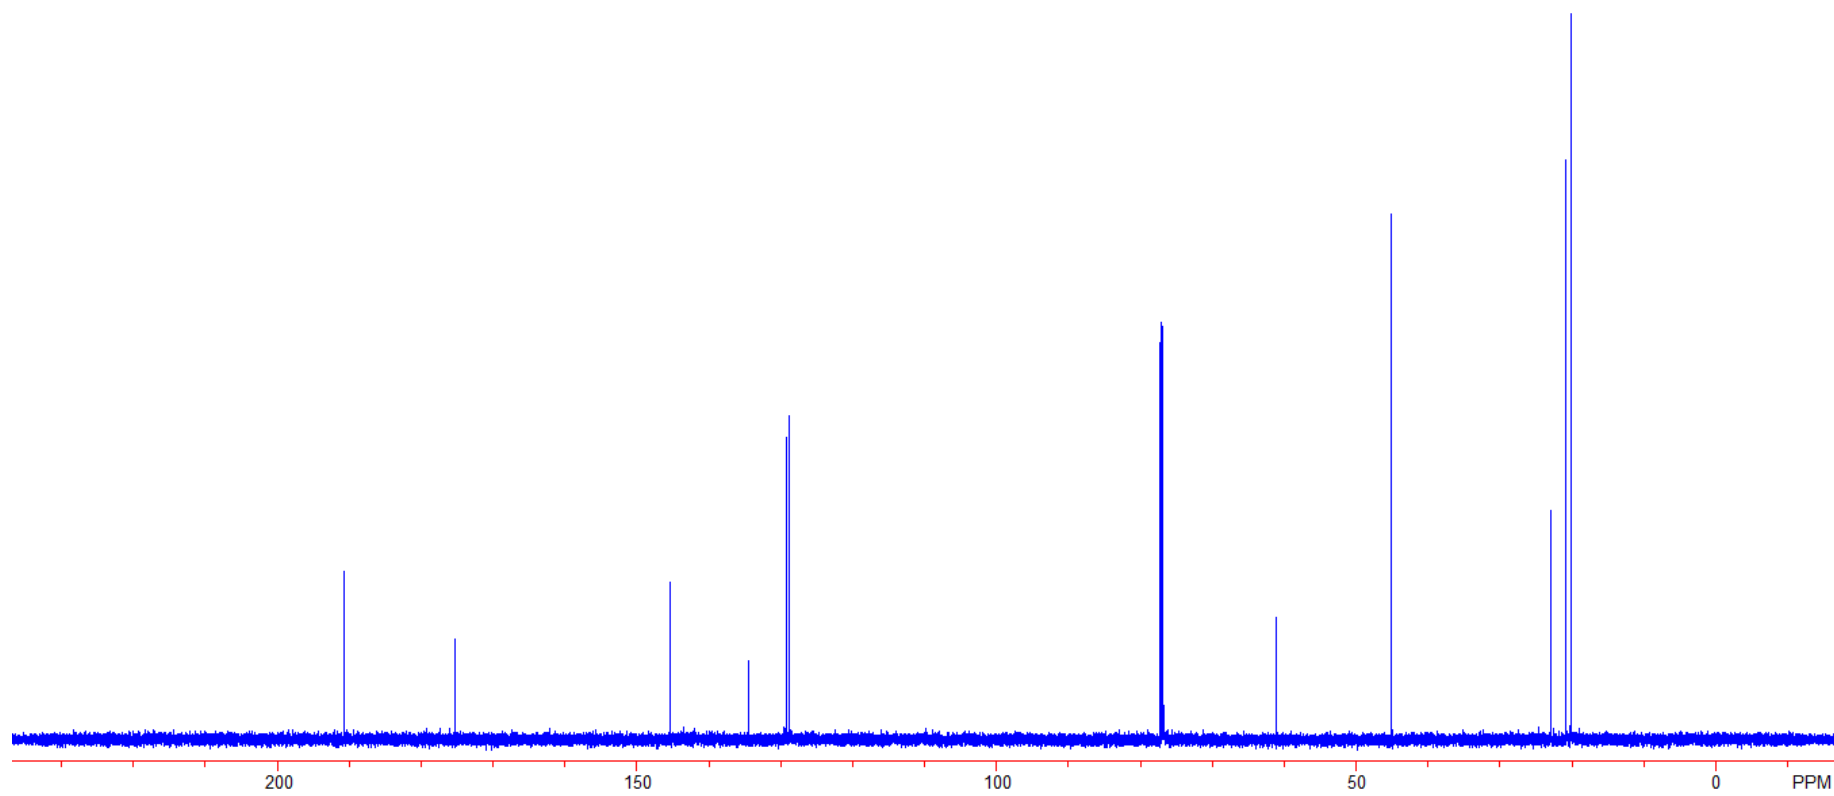

13C NMR Spectrum in CDCl<sub>3</sub>

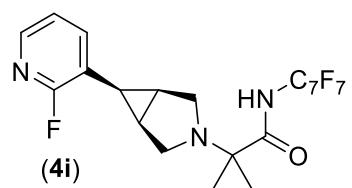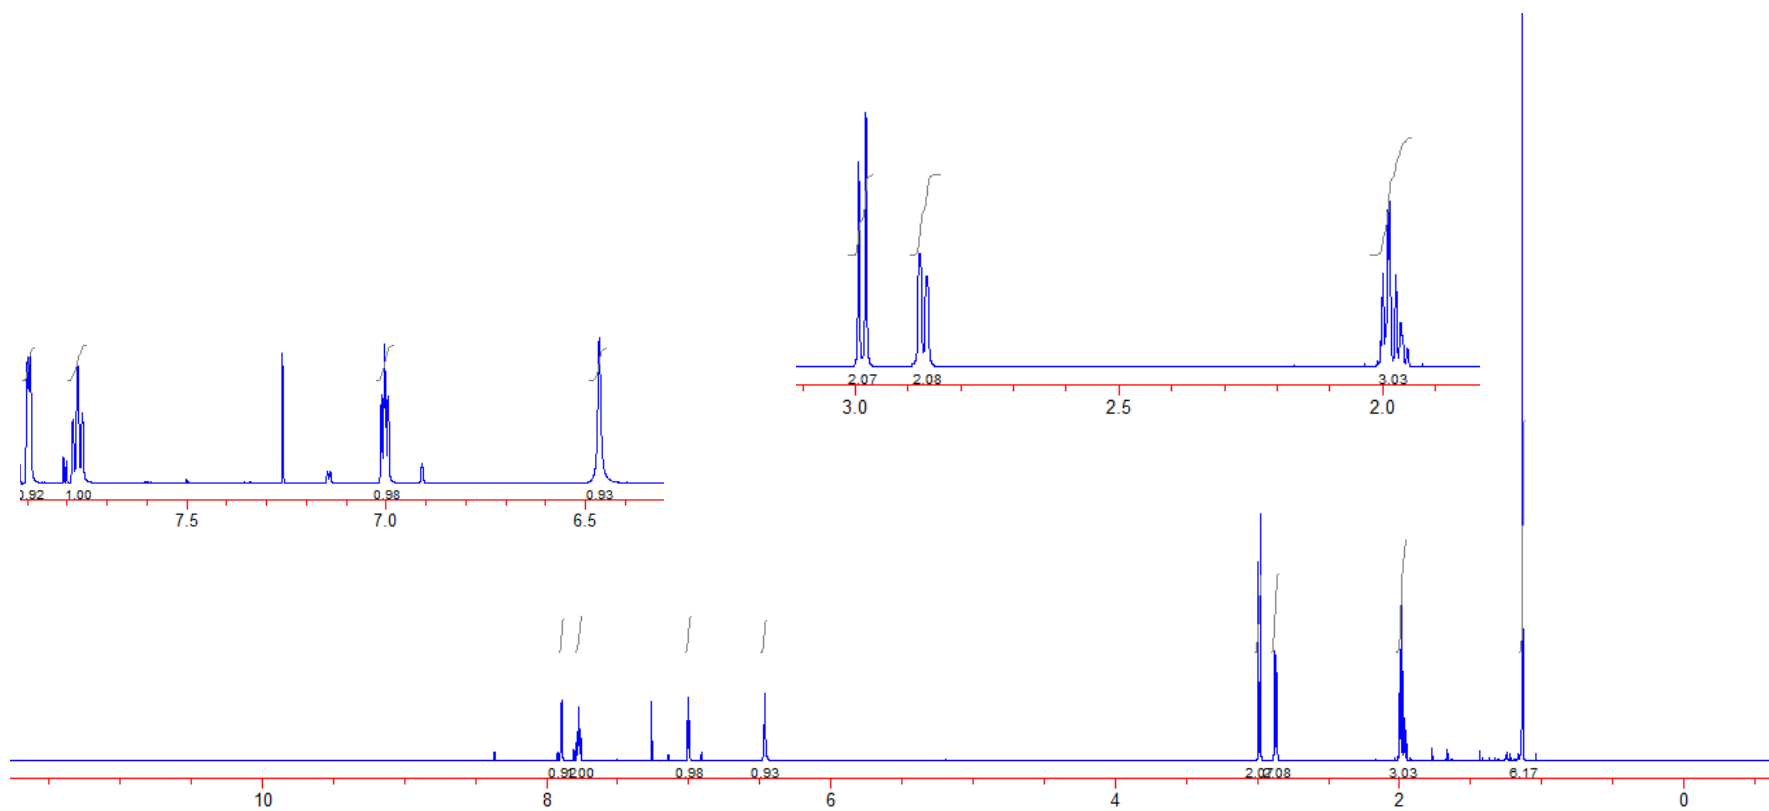

$^1\text{H}$  NMR Spectrum in  $\text{CDCl}_3$

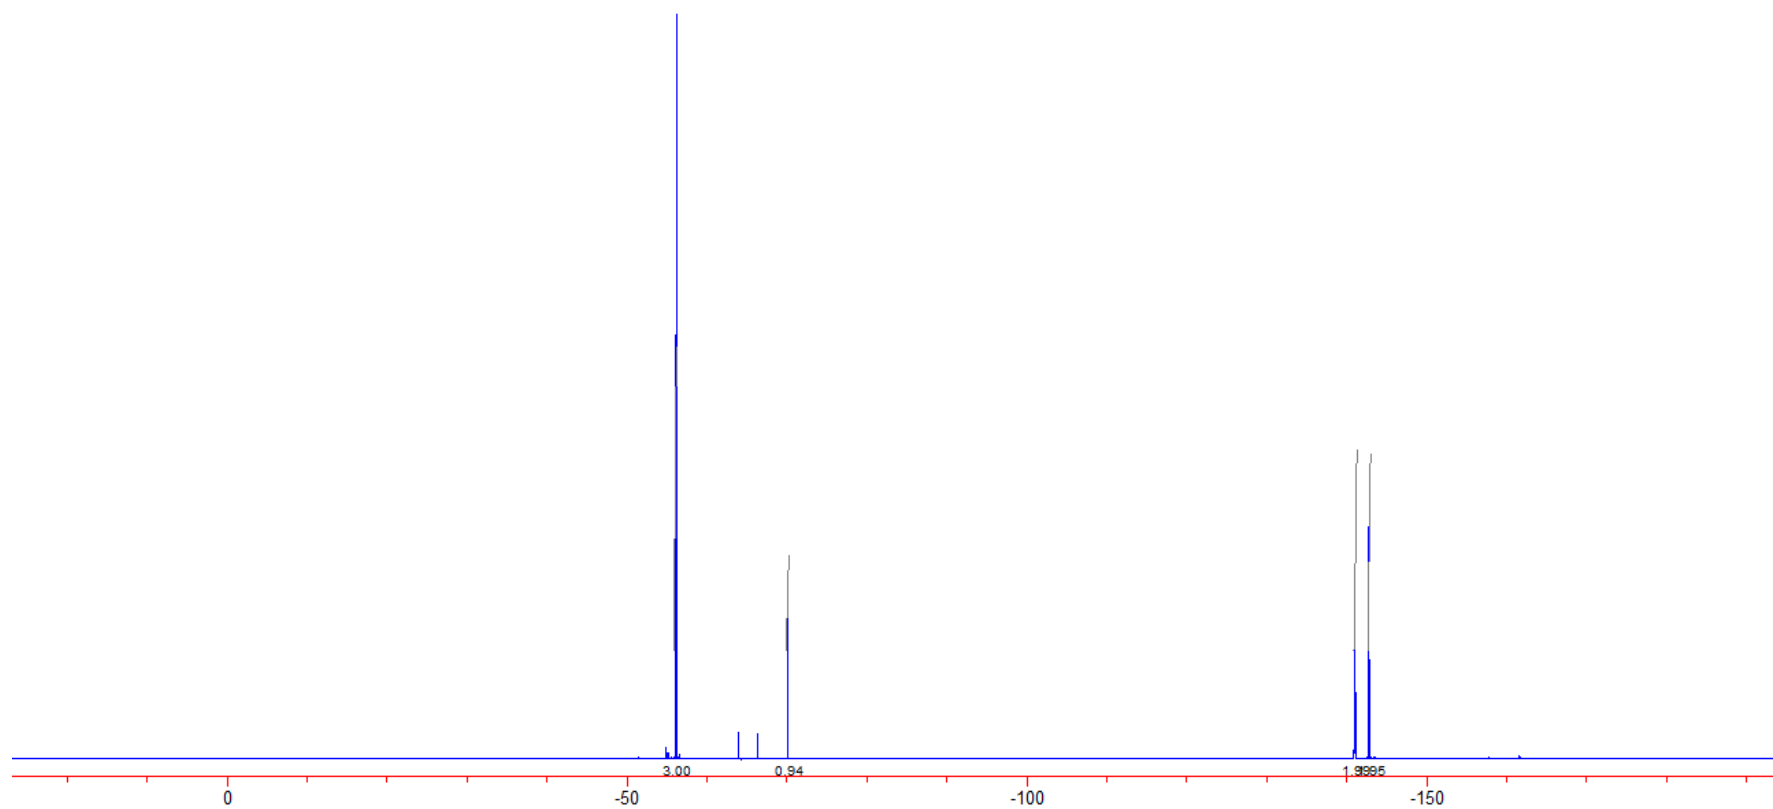

$^{19}\text{F}$  NMR Spectrum in  $\text{CDCl}_3$

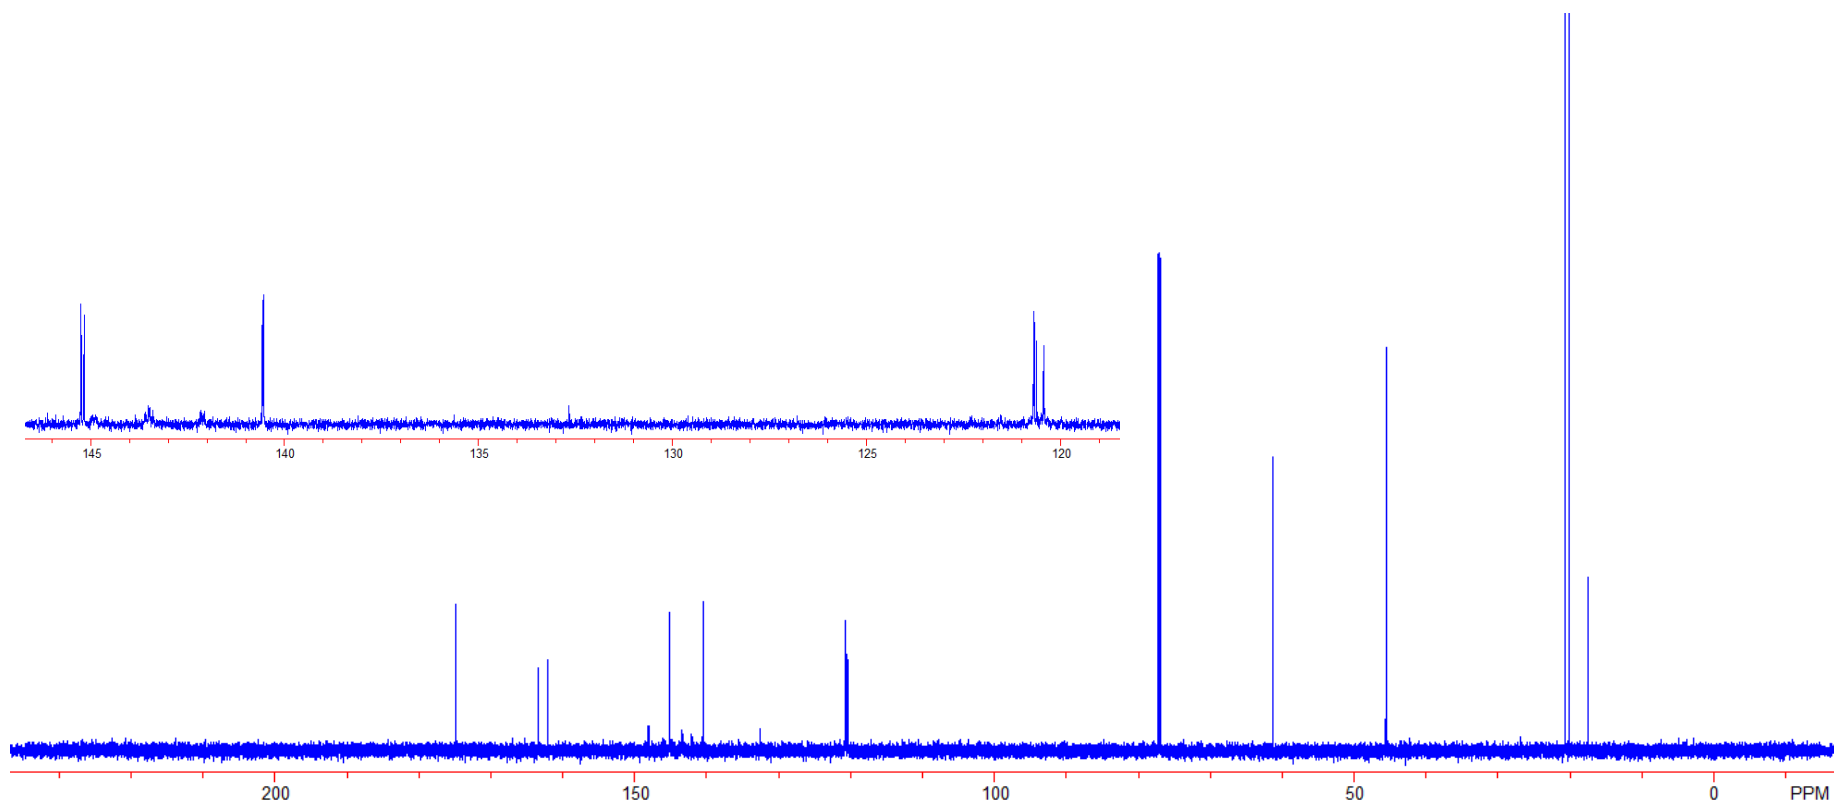

<sup>13</sup>C NMR Spectrum in CDCl<sub>3</sub>



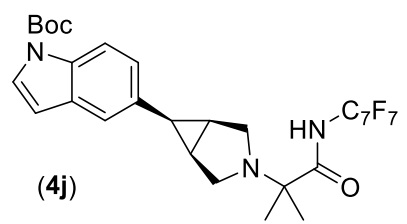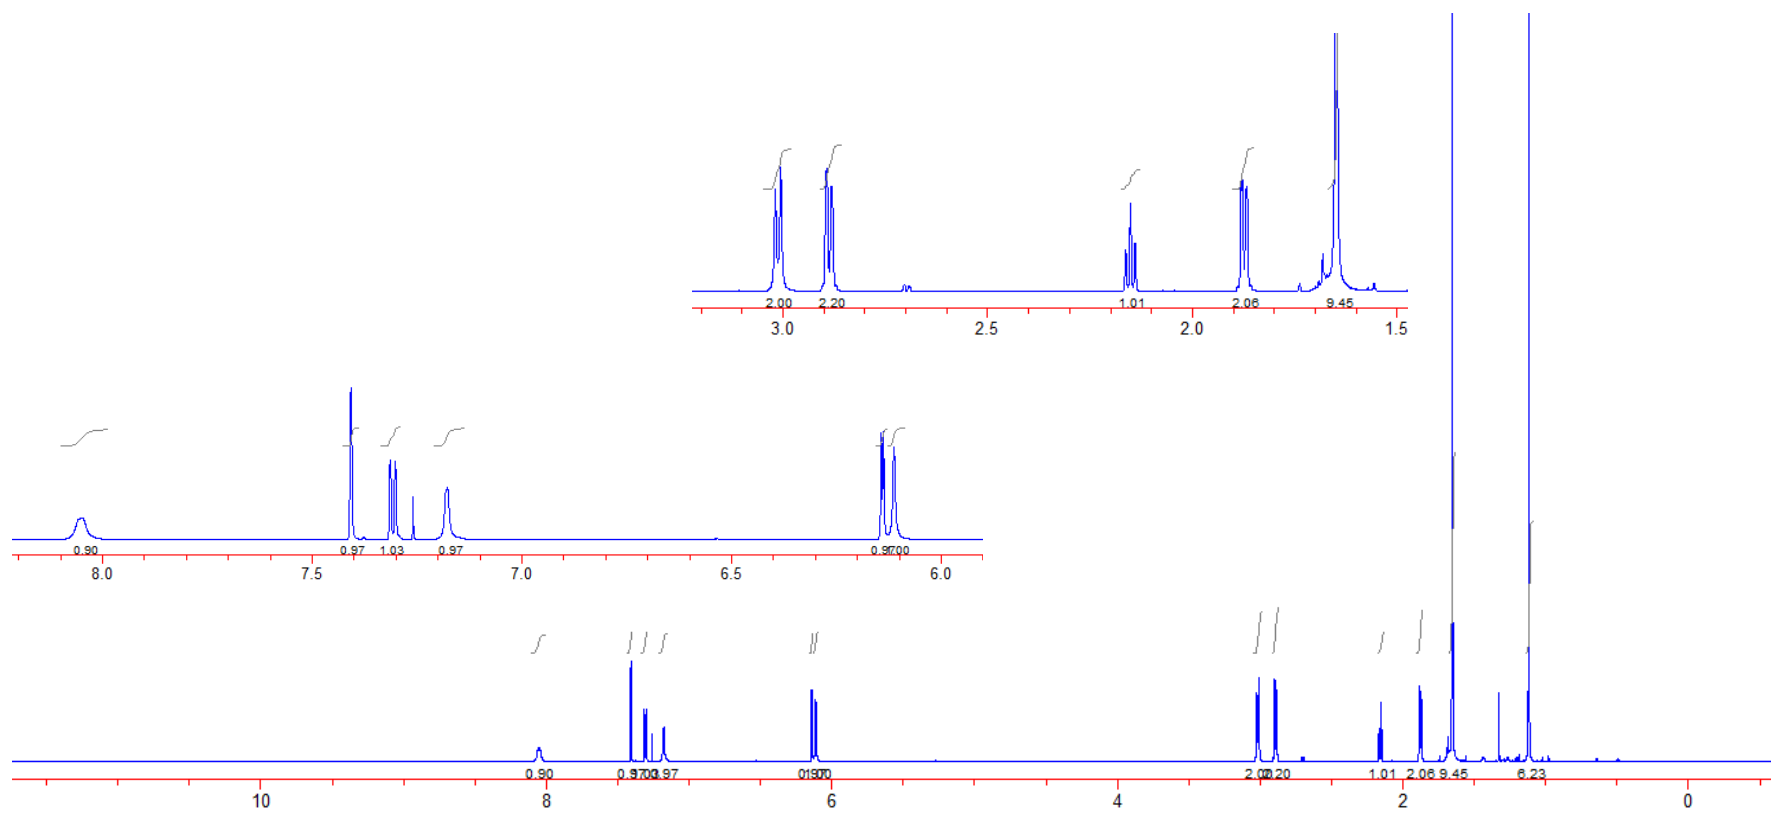

$^1\text{H}$  NMR Spectrum in  $\text{CDCl}_3$

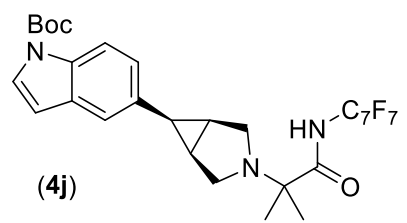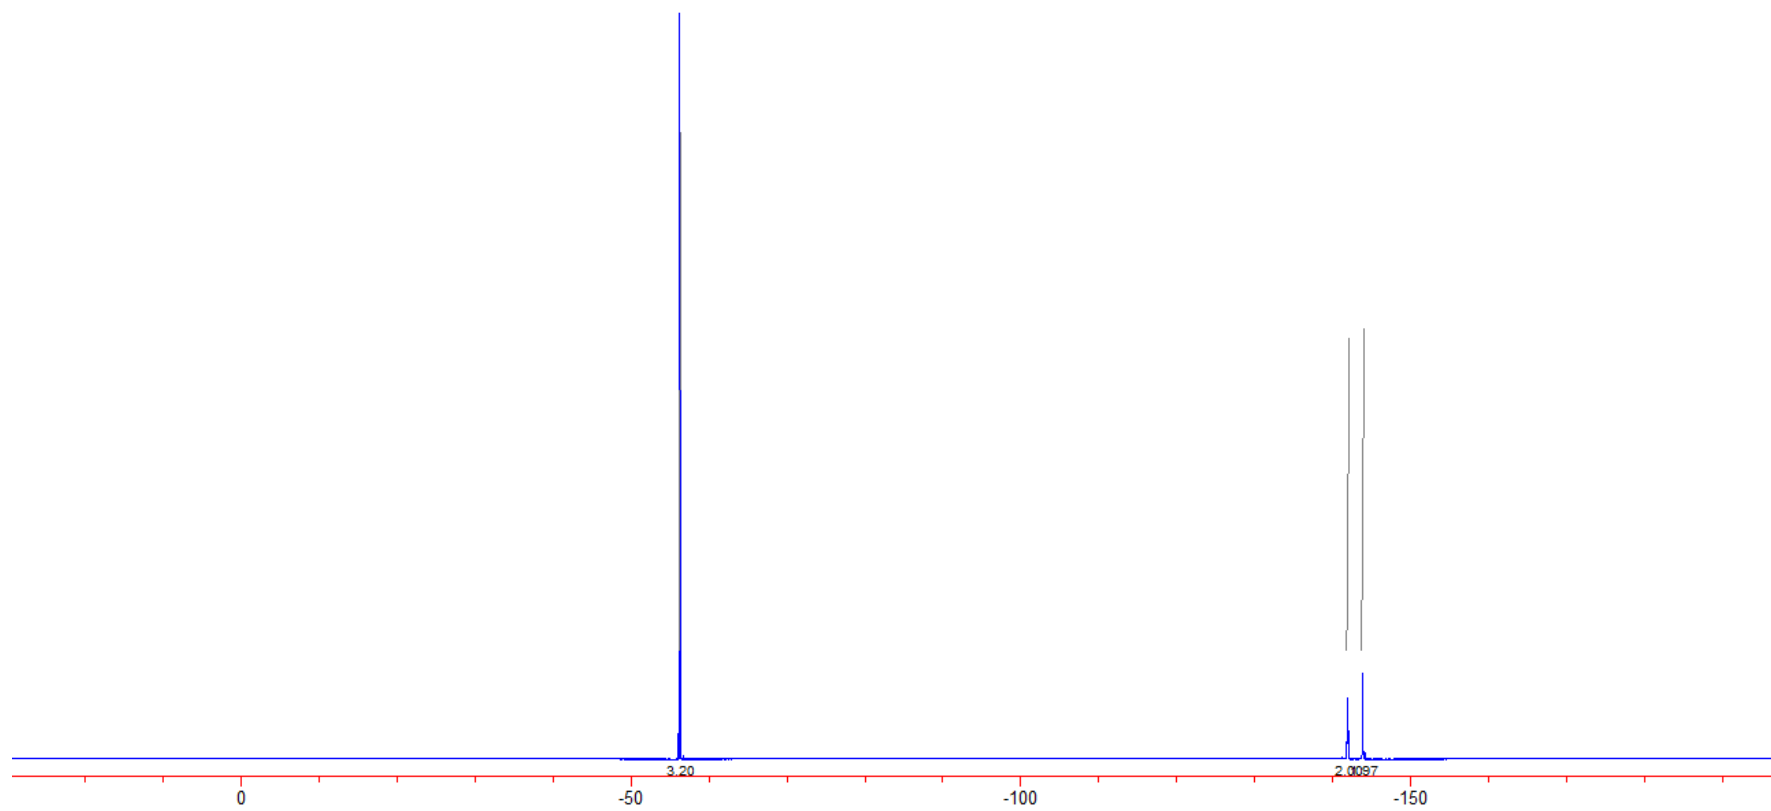

<sup>19</sup>F NMR Spectrum in CDCl<sub>3</sub>

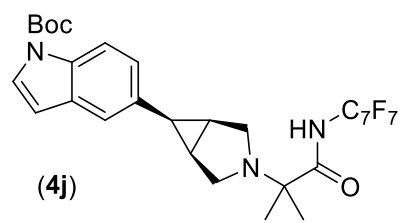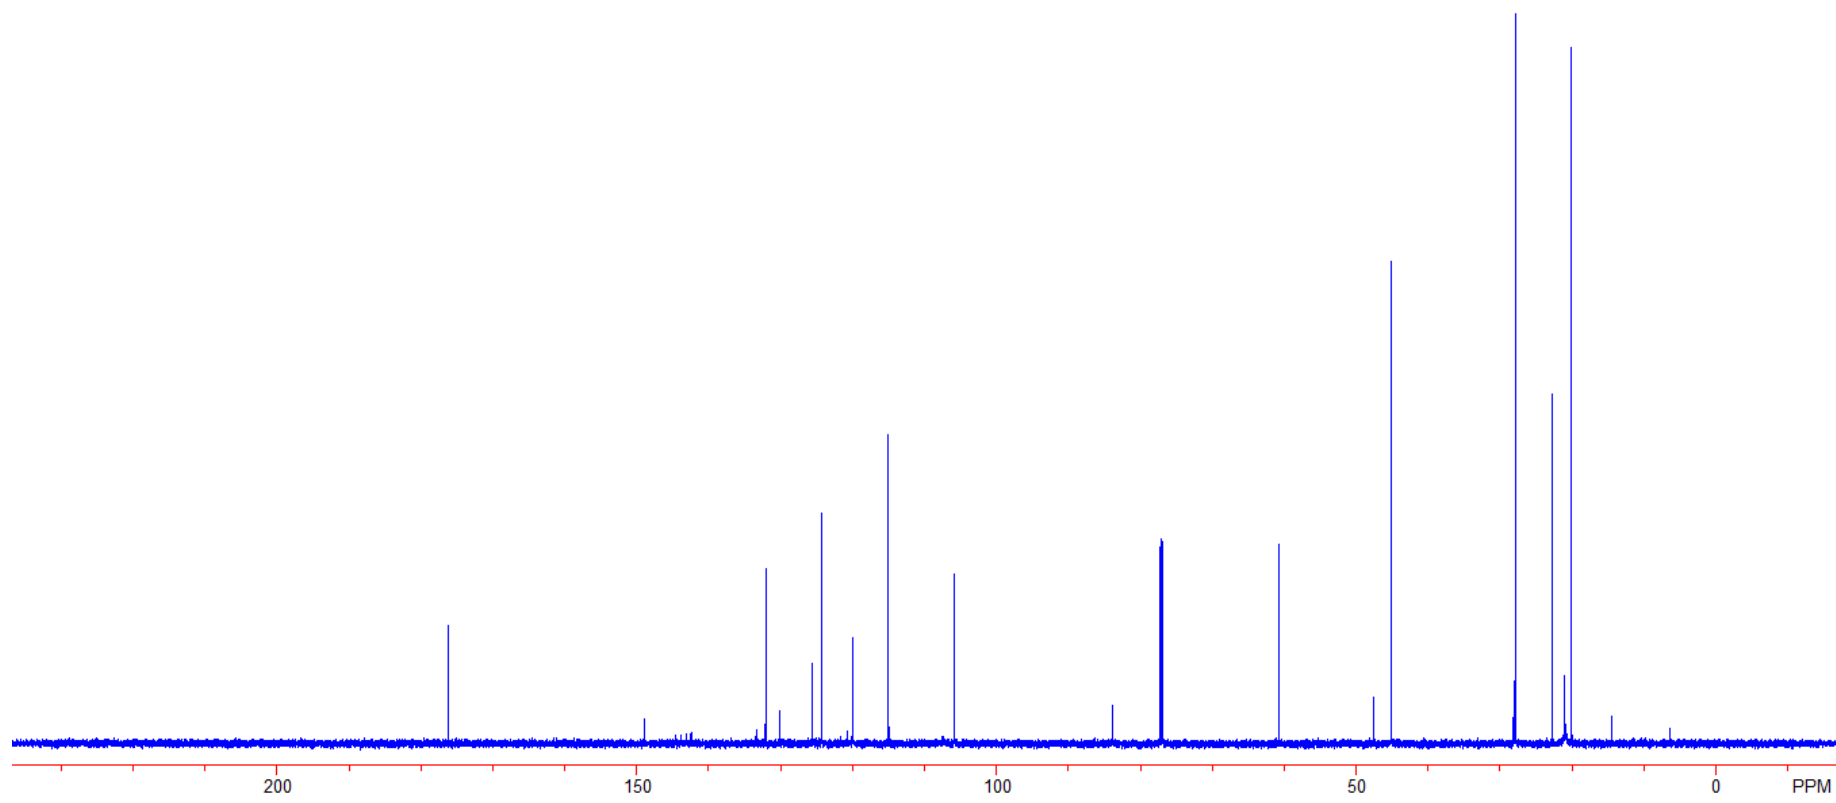

<sup>13</sup>C NMR Spectrum in CDCl<sub>3</sub>

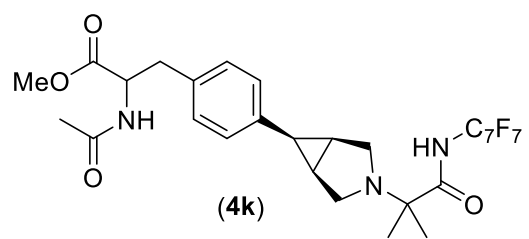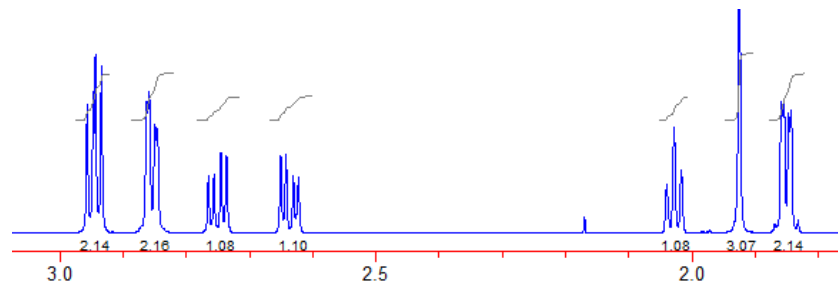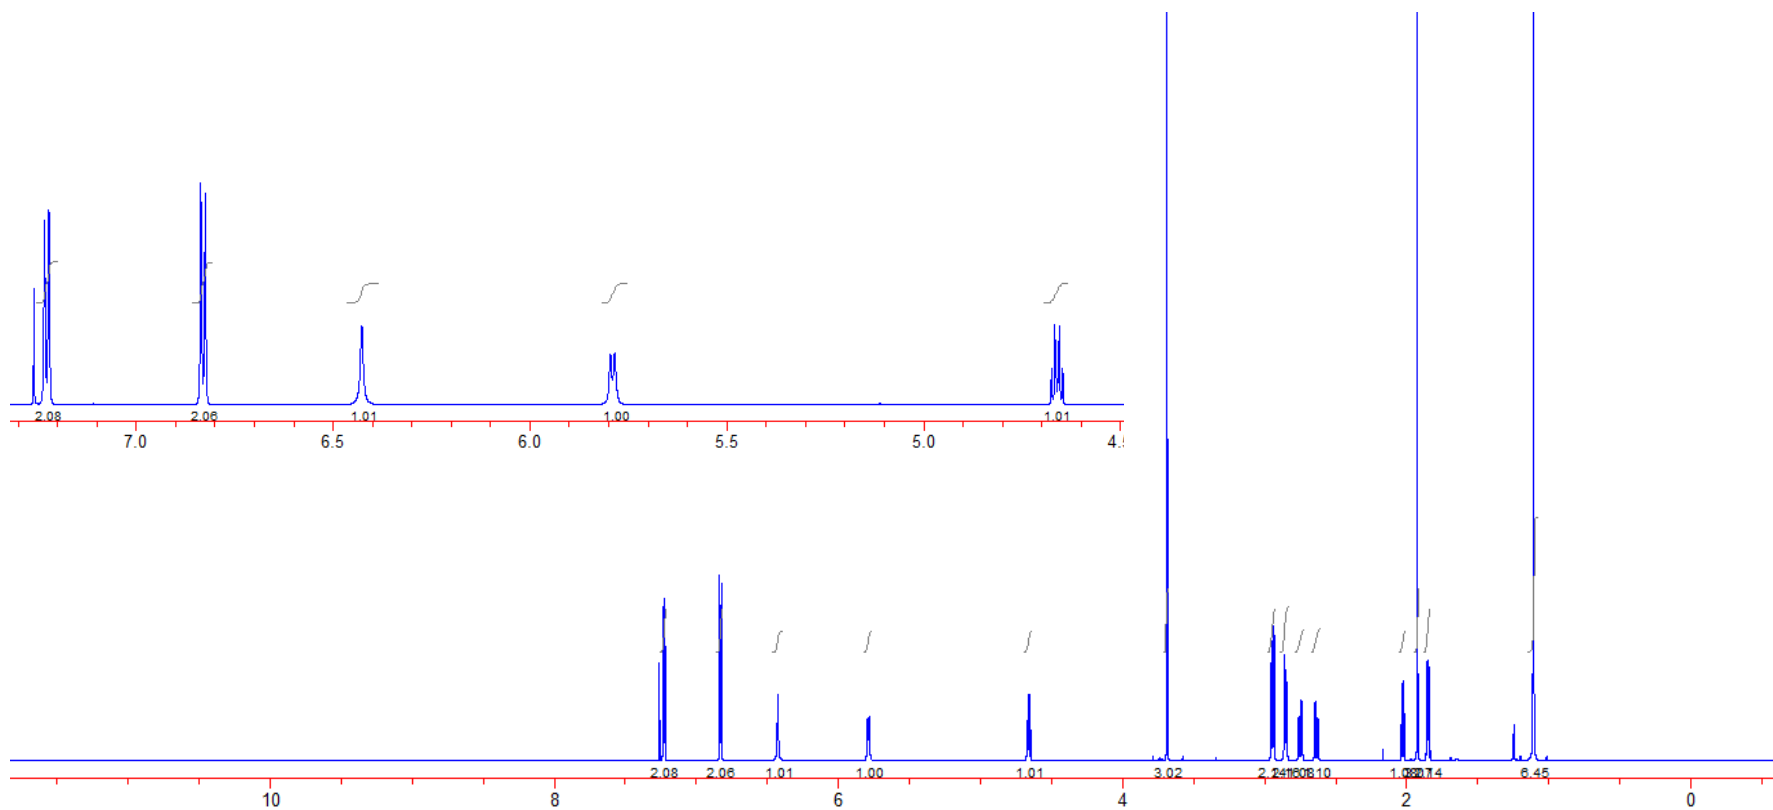

<sup>1</sup>H NMR Spectrum in CDCl<sub>3</sub>

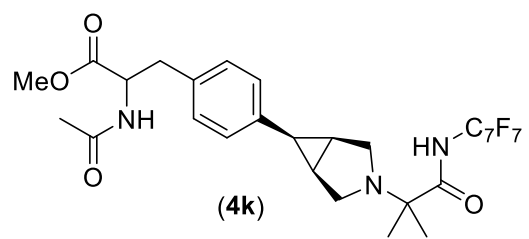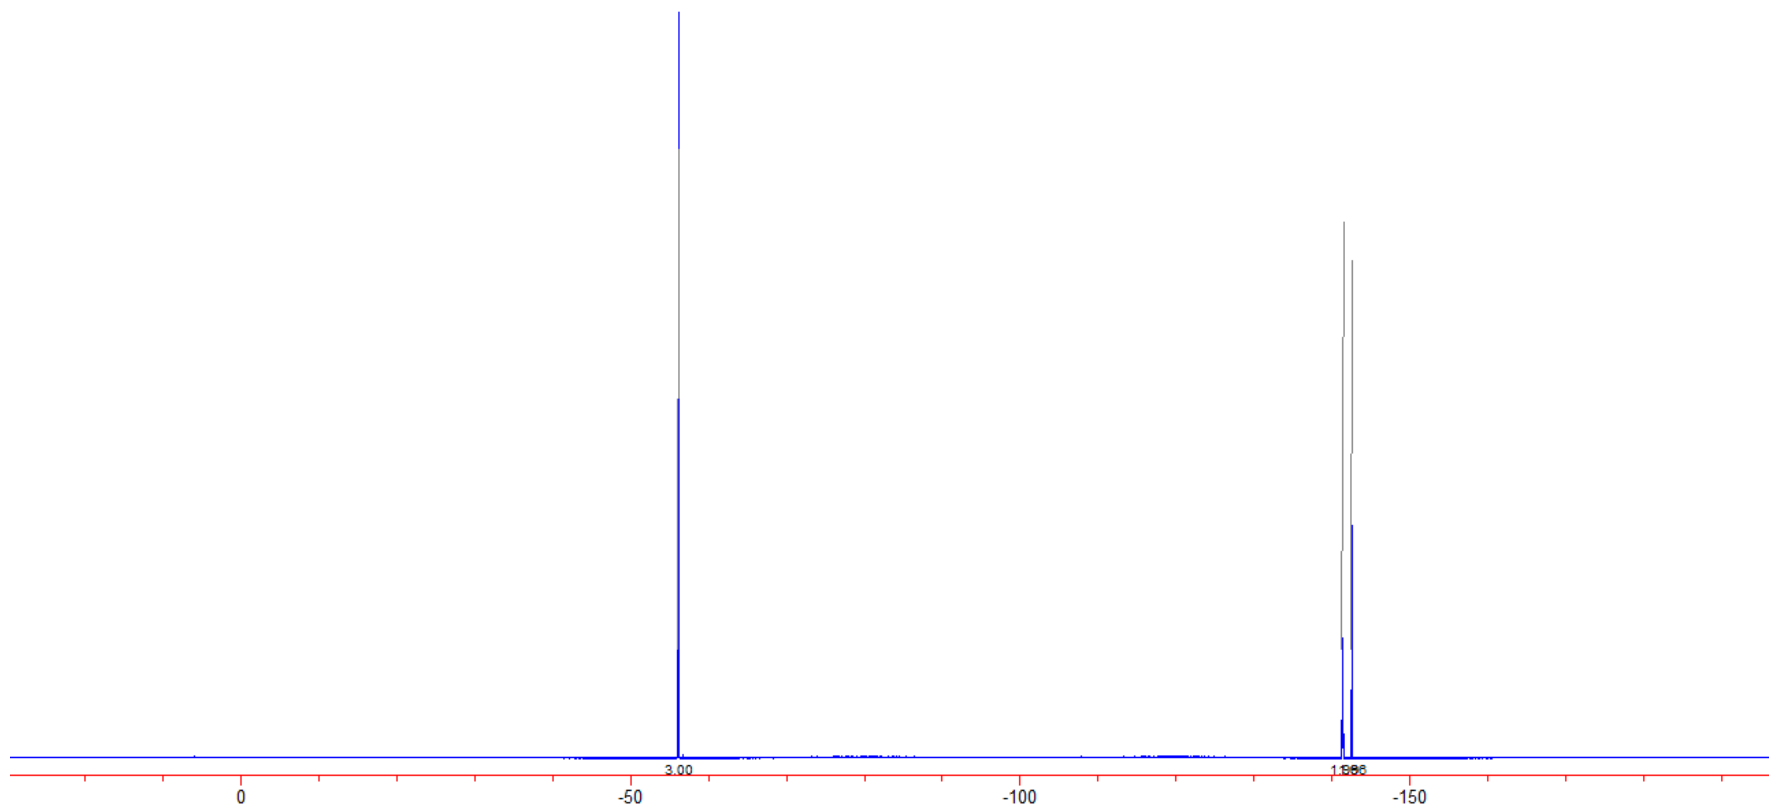

$^{19}\text{F}$  NMR Spectrum in  $\text{CDCl}_3$

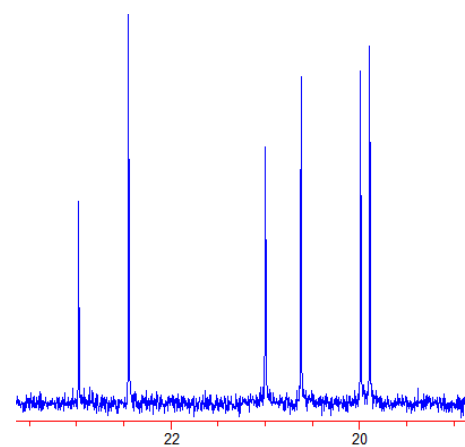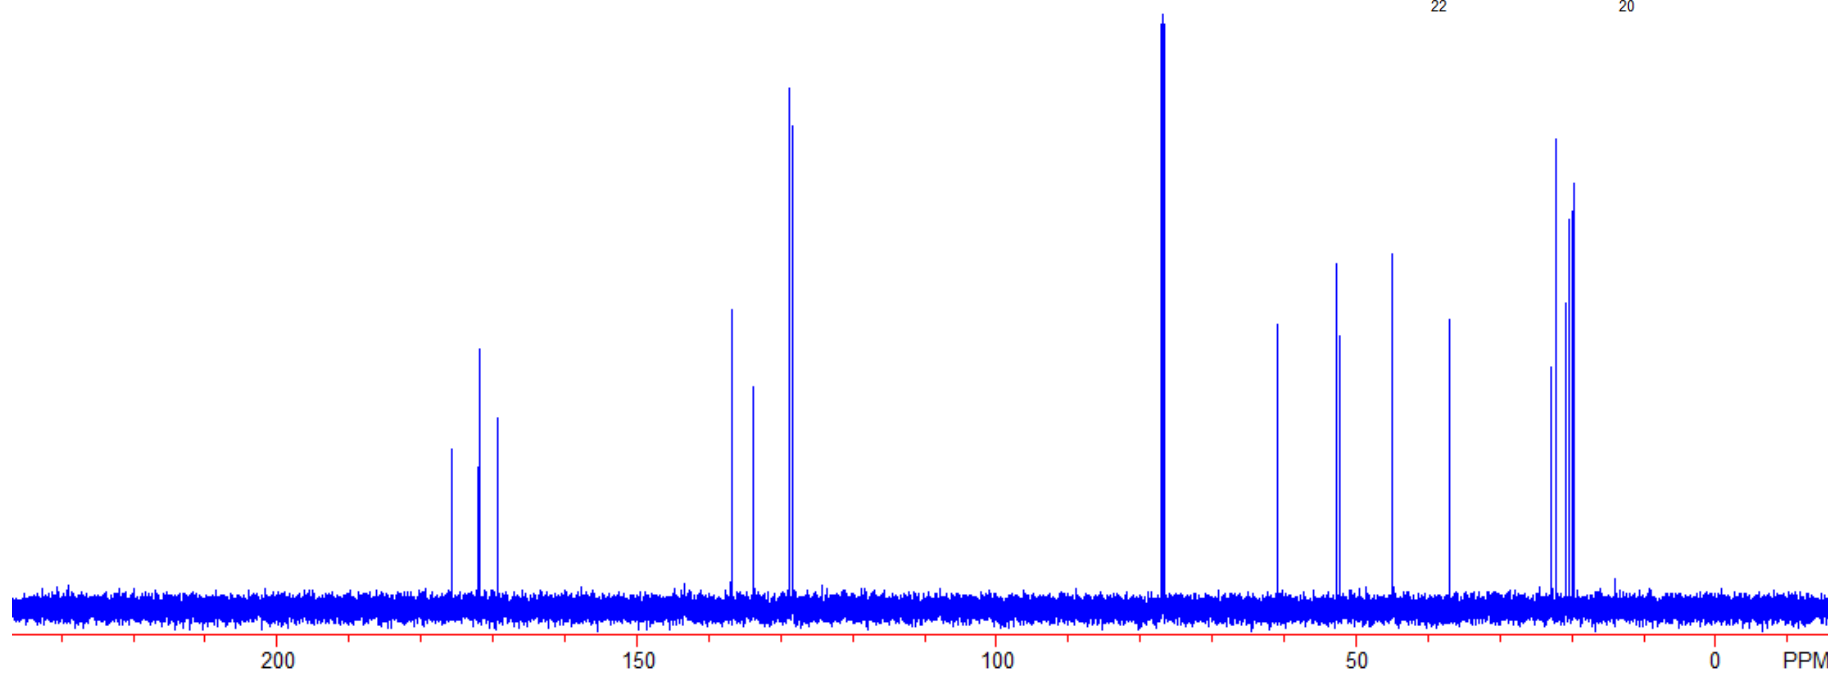

$^{13}\text{C}$  NMR Spectrum in  $\text{CDCl}_3$

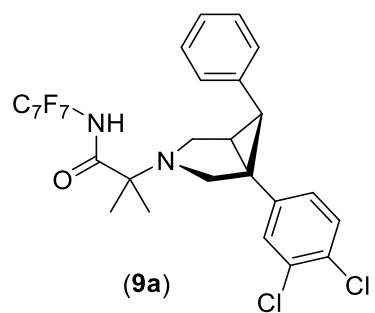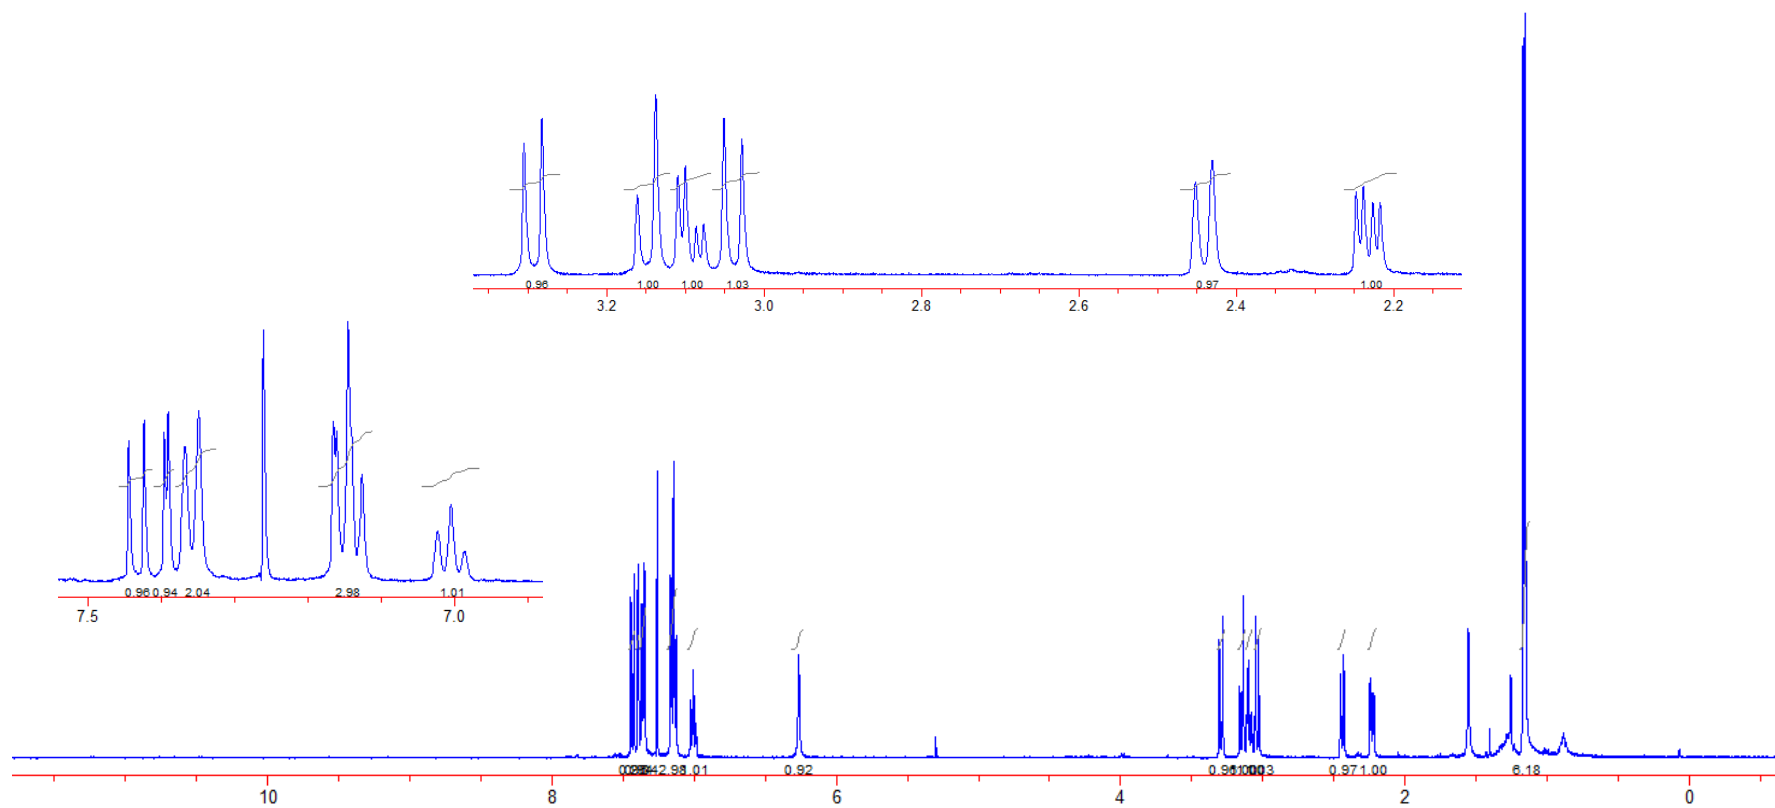

$^1\text{H}$  NMR Spectrum in  $\text{CDCl}_3$

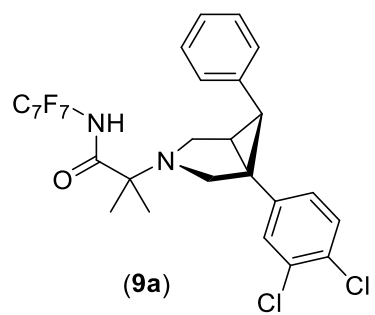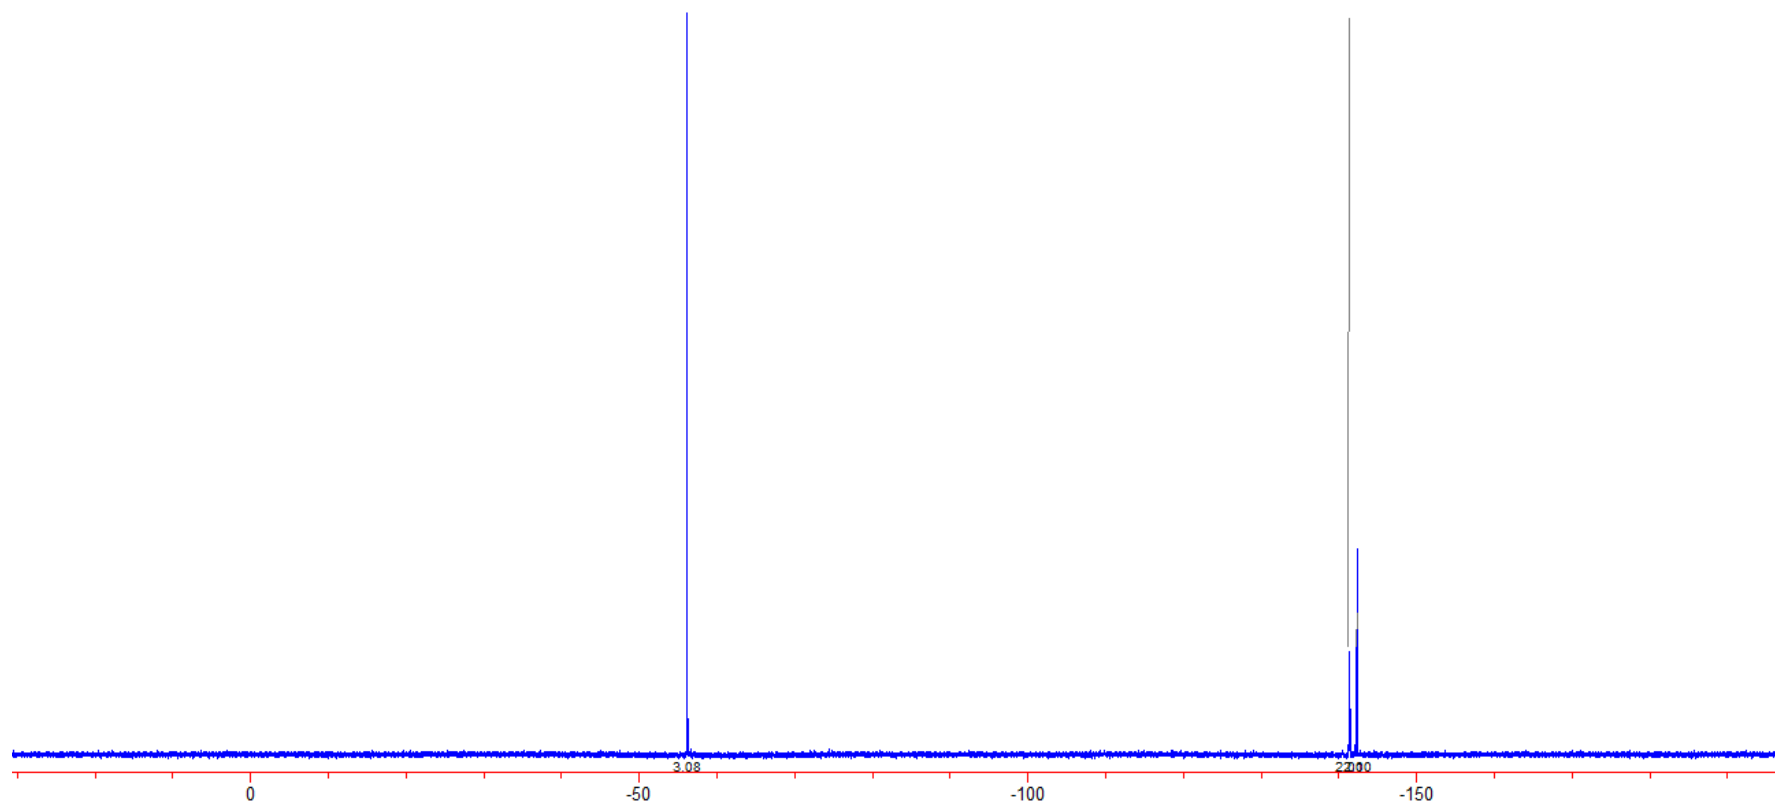

$^{19}\text{F}$  NMR Spectrum in  $\text{CDCl}_3$



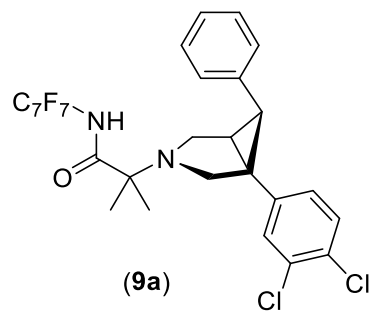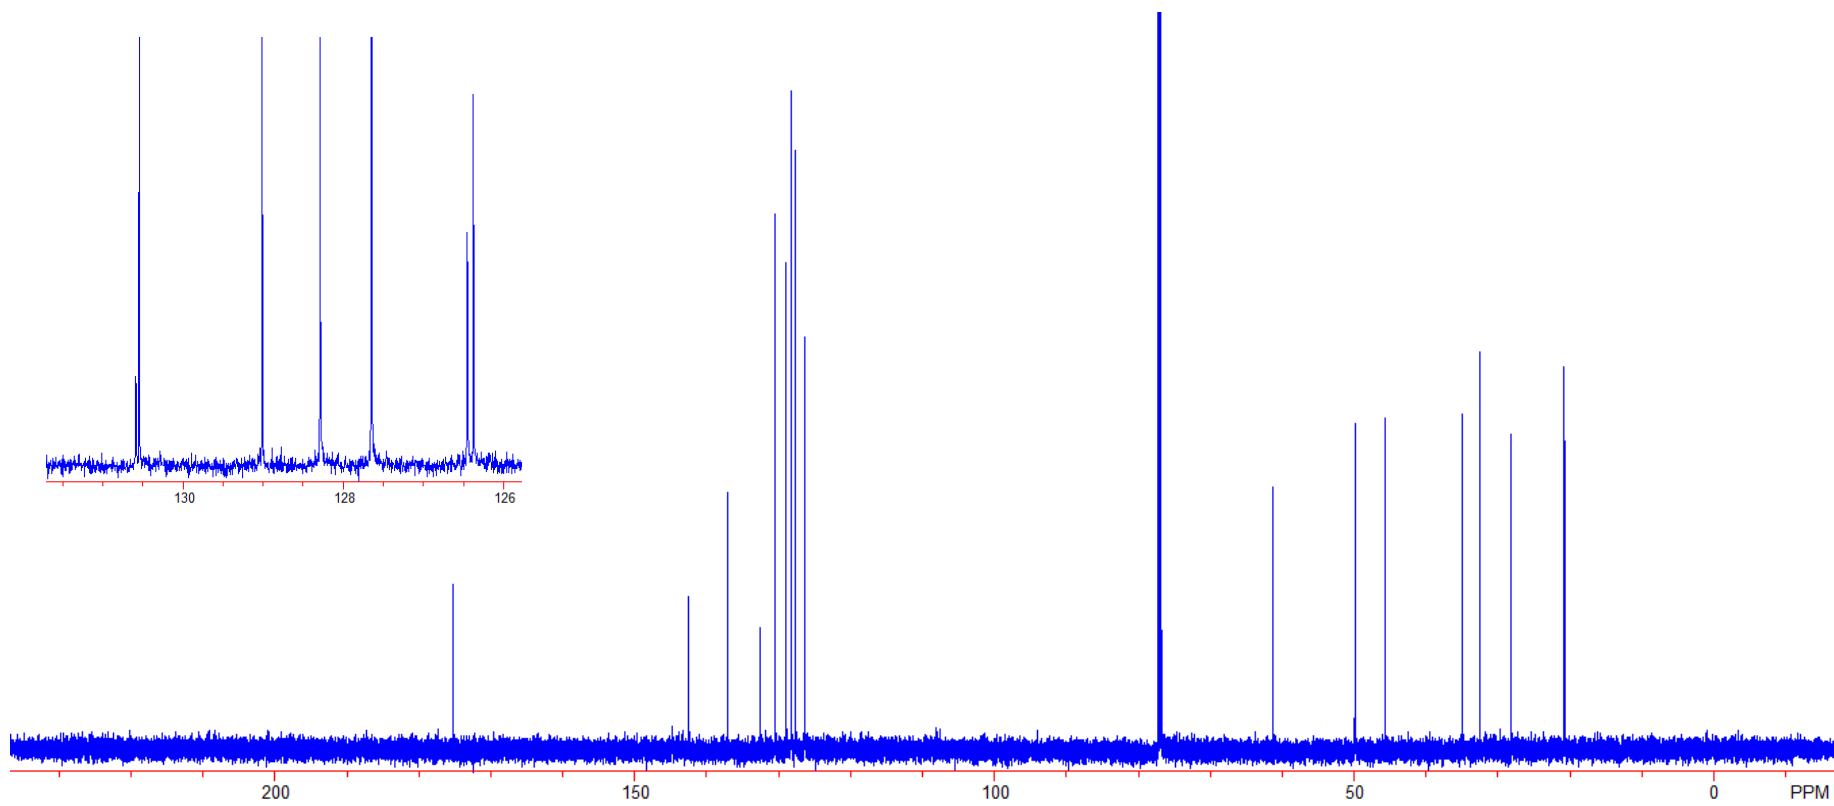

$^{13}\text{C}$  NMR Spectrum in  $\text{CDCl}_3$

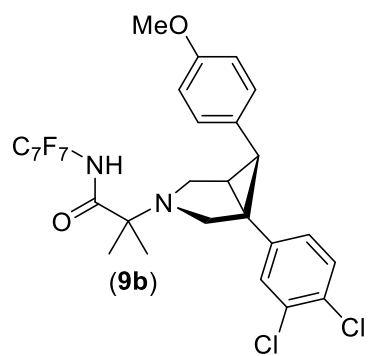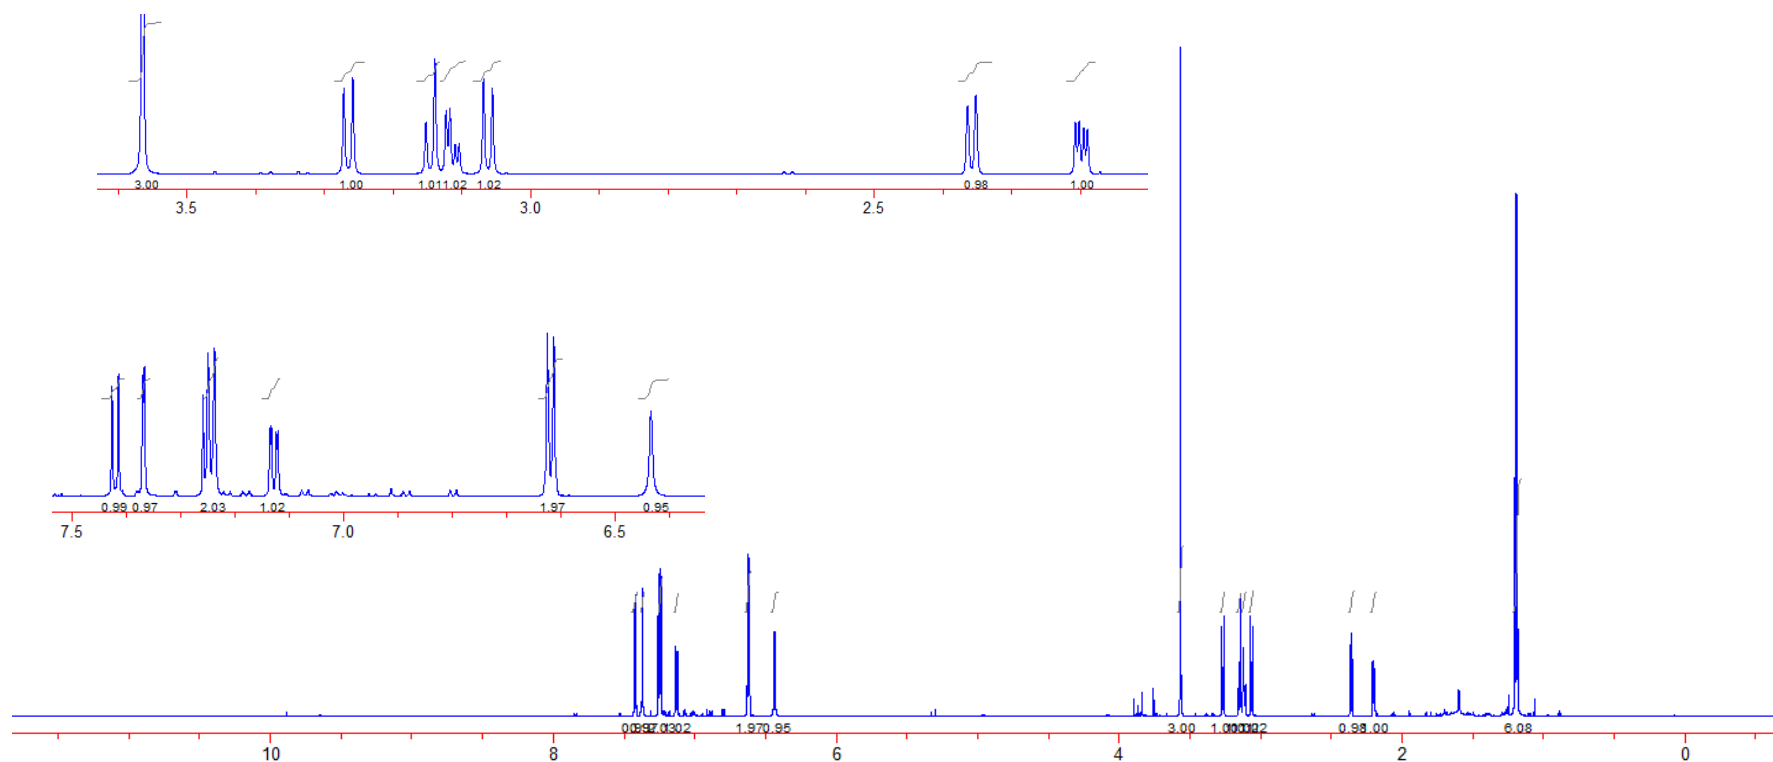

<sup>1</sup>H NMR Spectrum in CDCl<sub>3</sub>

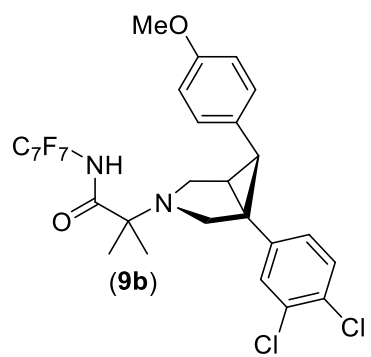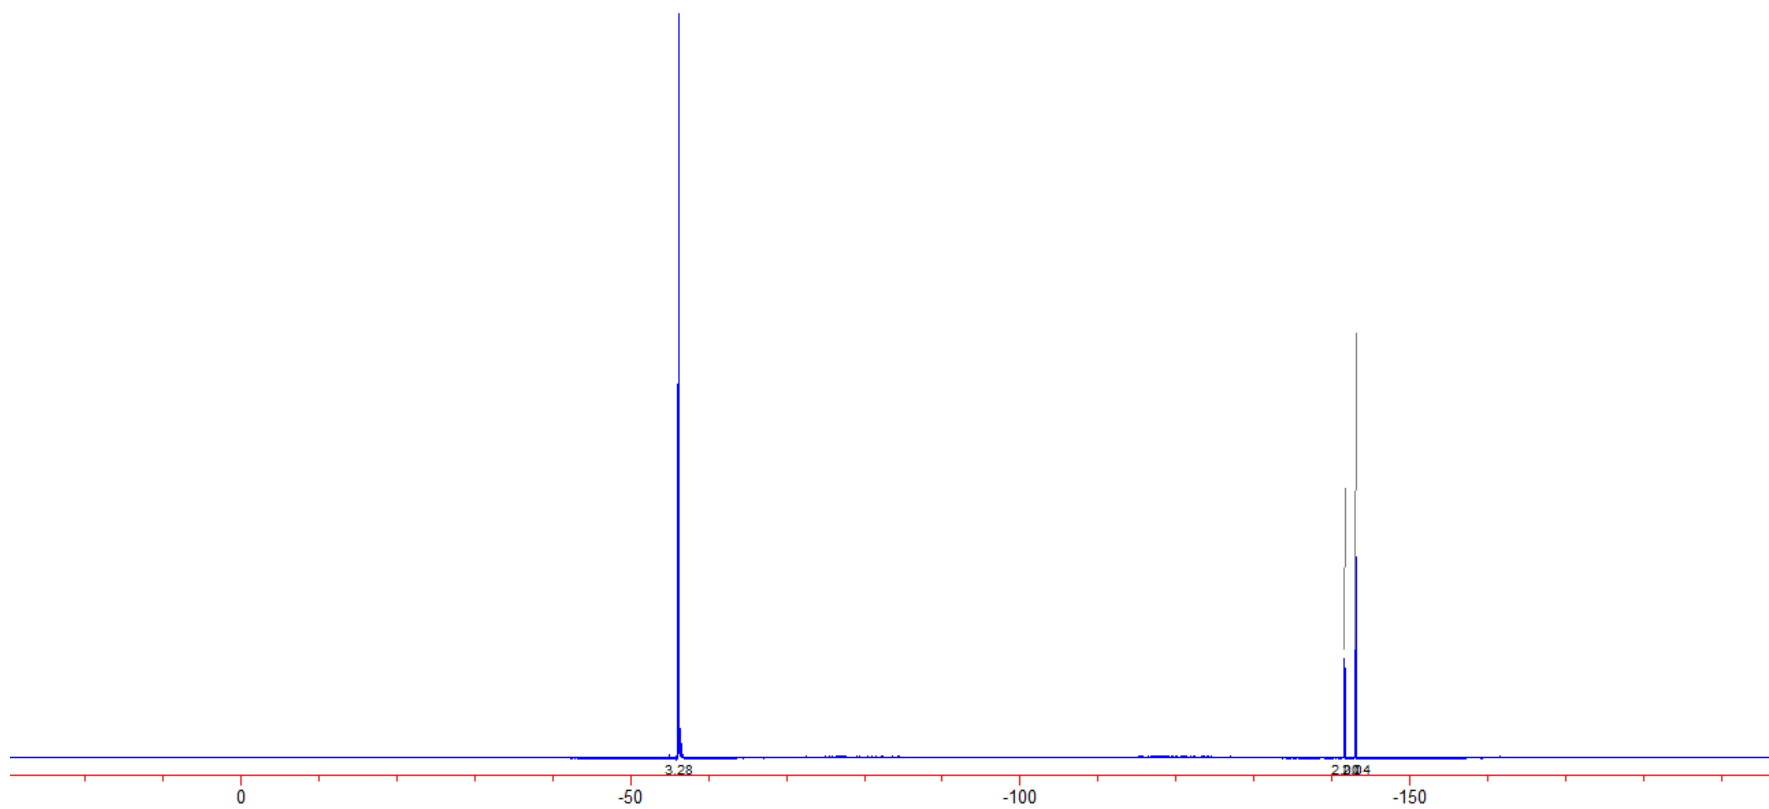

$^{19}\text{F}$  NMR Spectrum in  $\text{CDCl}_3$

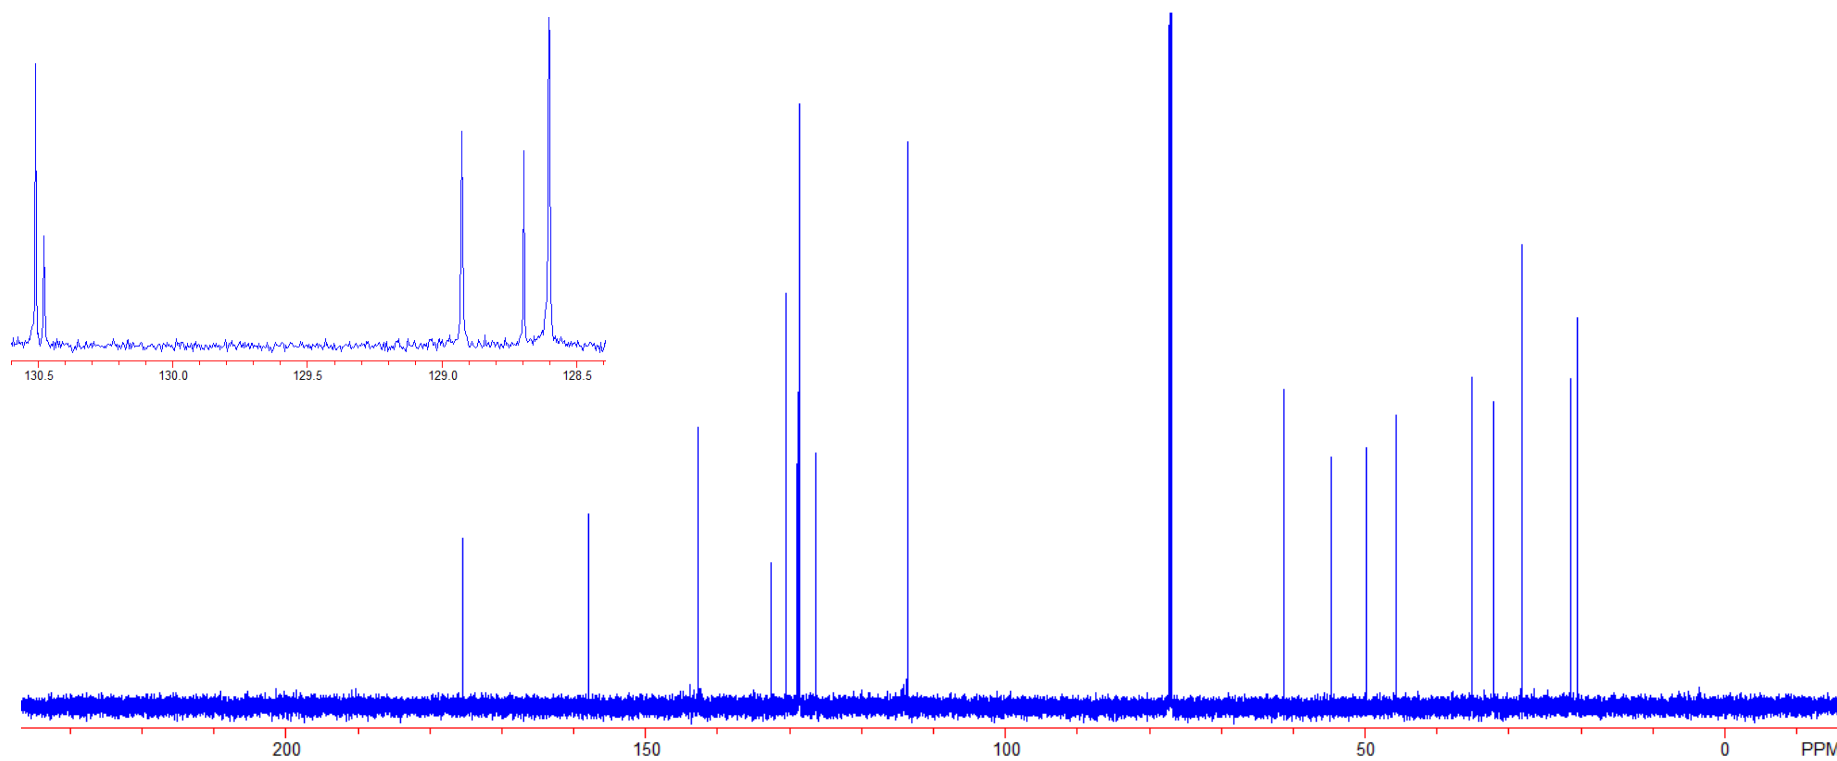

$^{13}\text{C}$  NMR Spectrum in  $\text{CDCl}_3$

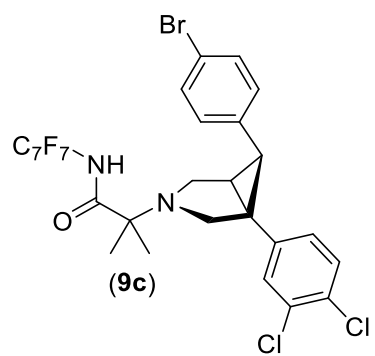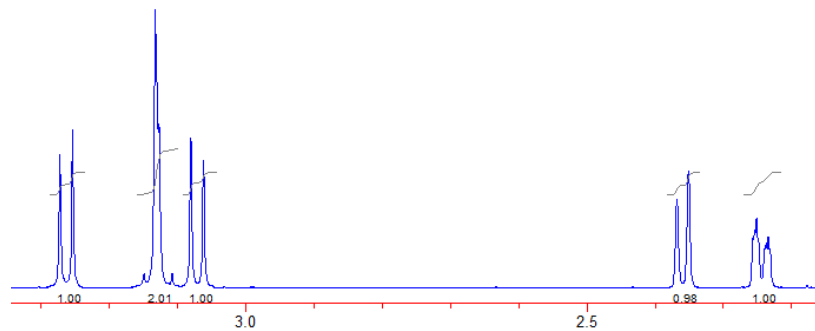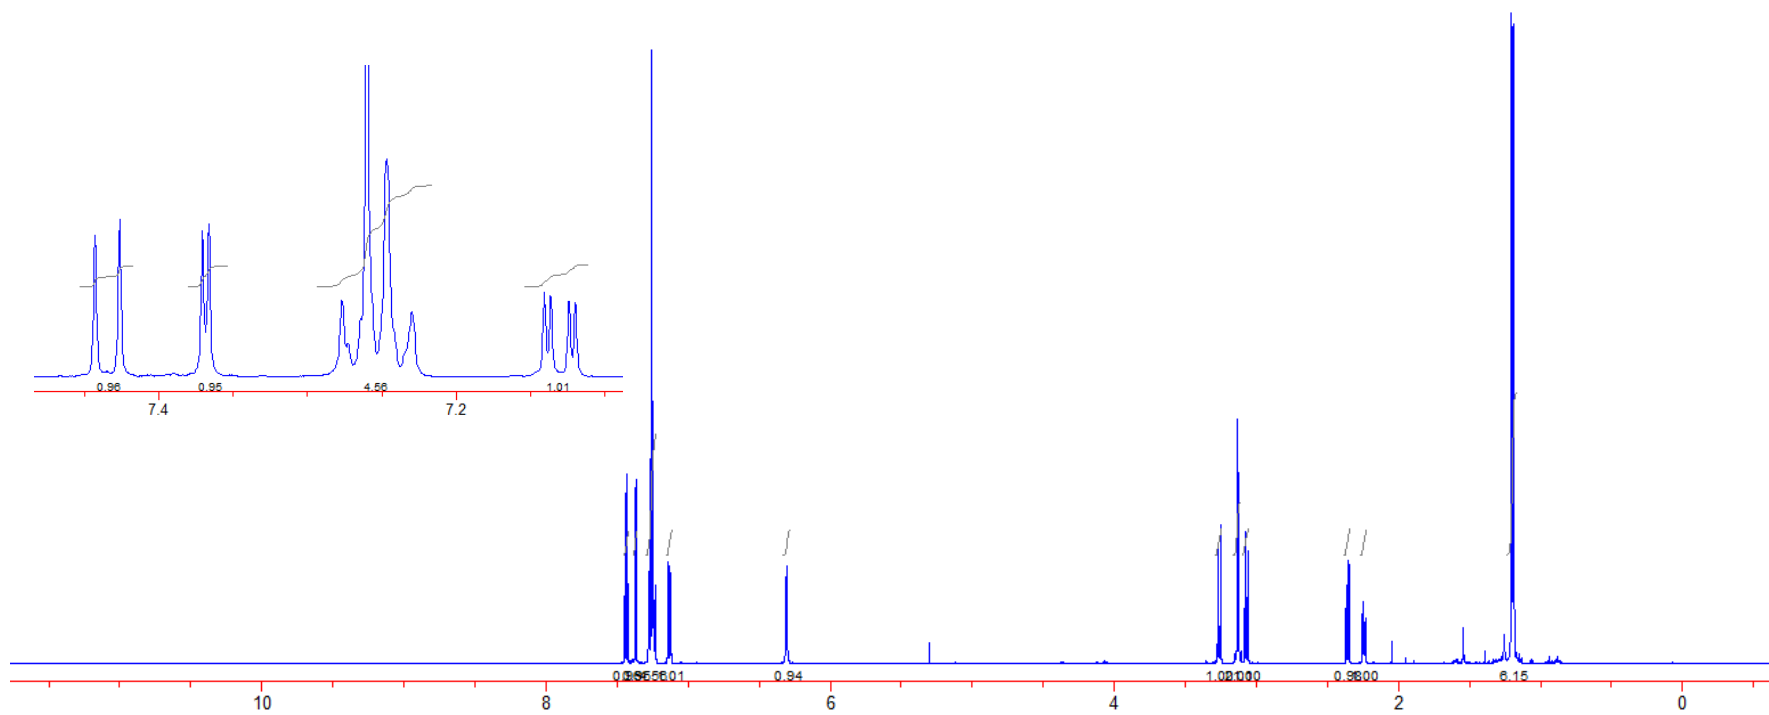

$^1\text{H}$  NMR Spectrum in  $\text{CDCl}_3$

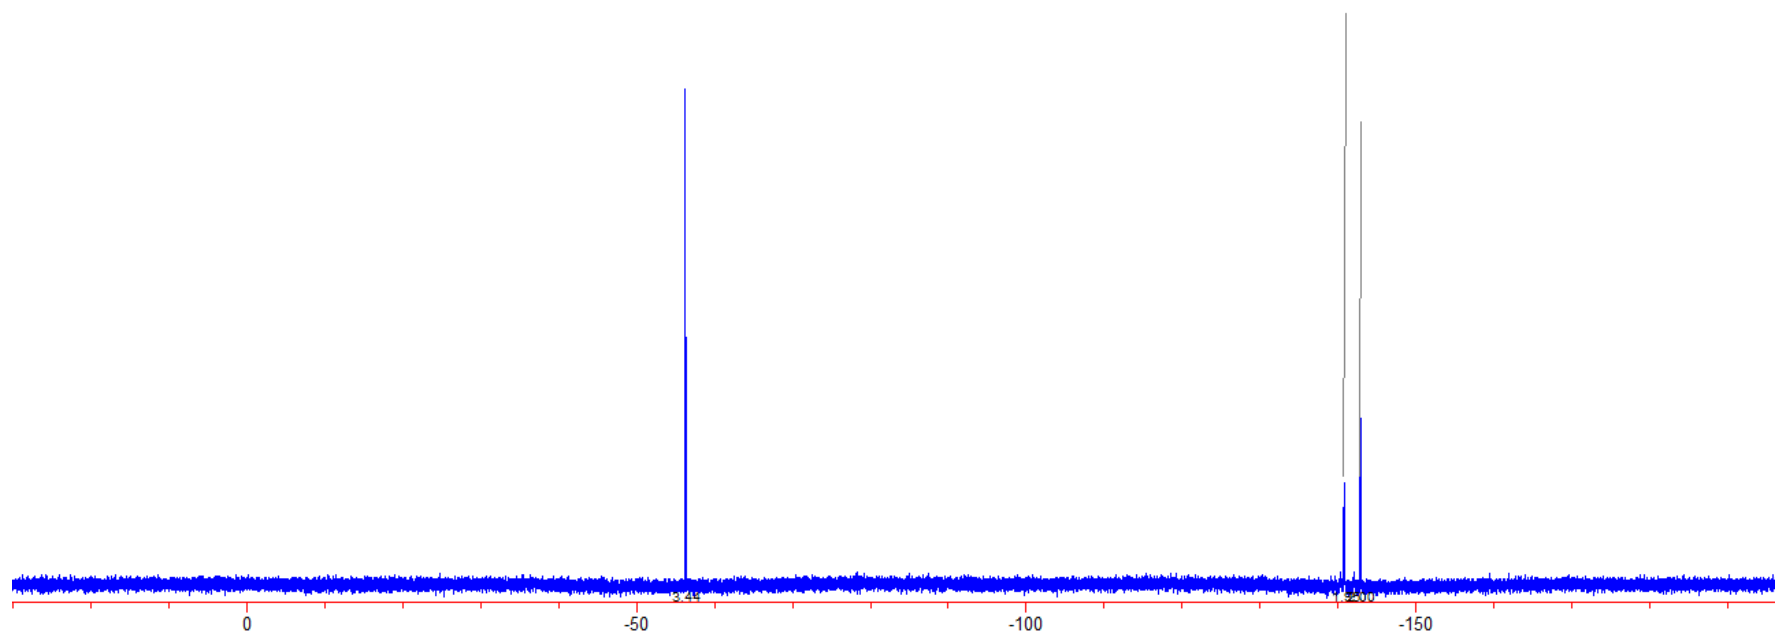

$^{19}\text{F}$  NMR Spectrum in  $\text{CDCl}_3$

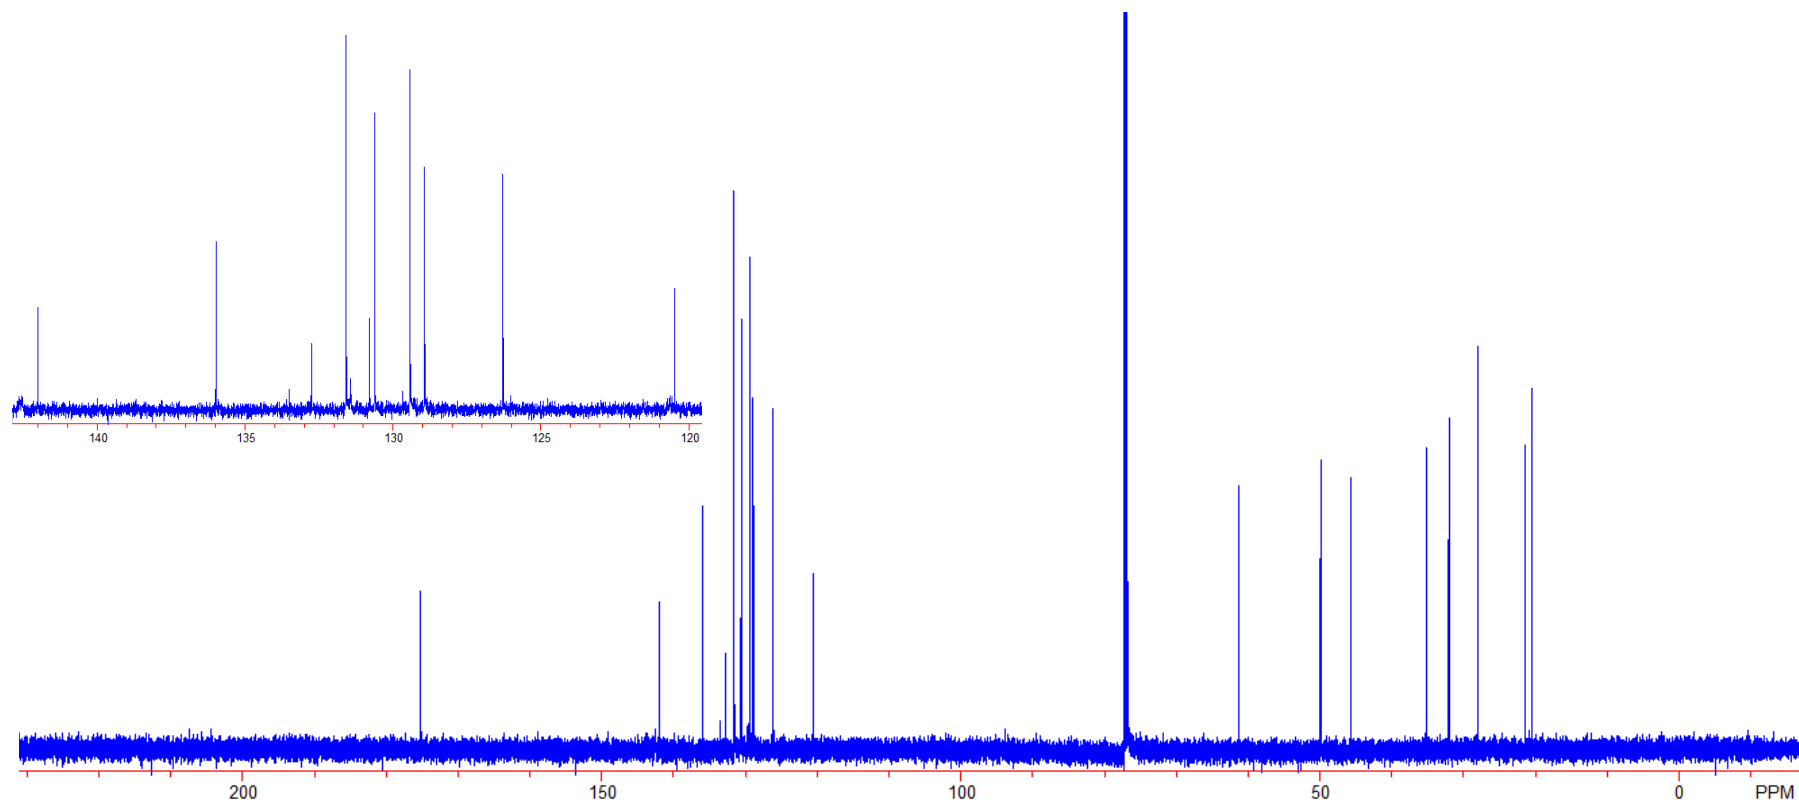

$^{13}\text{C}$  NMR Spectrum in  $\text{CDCl}_3$

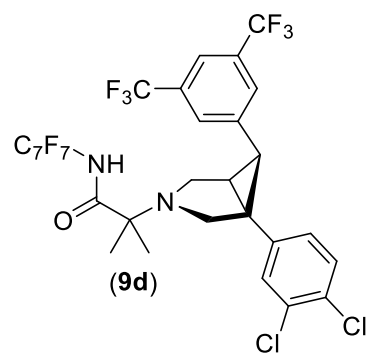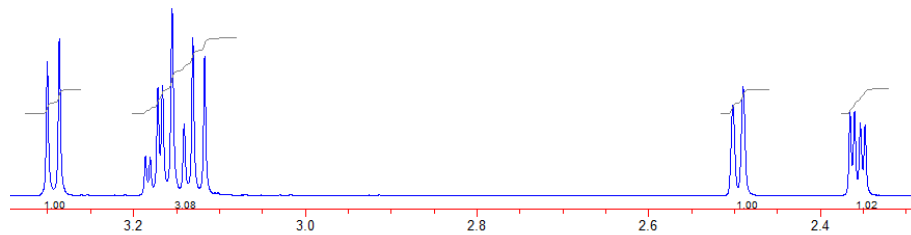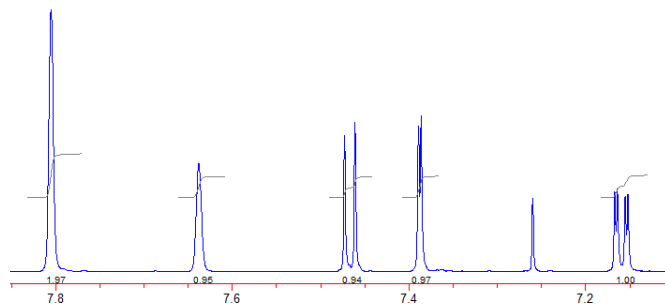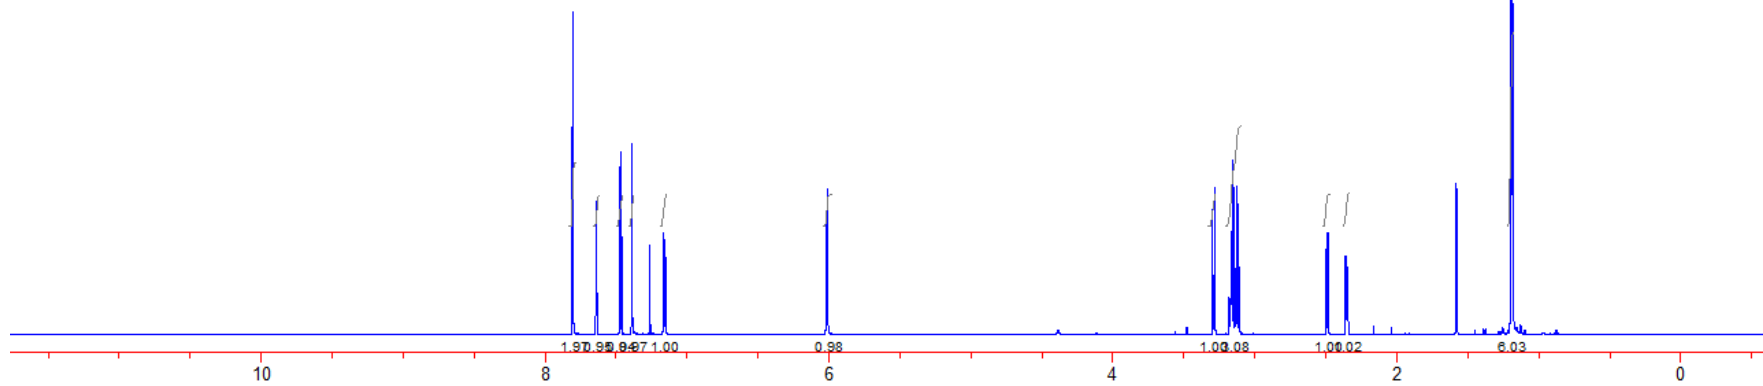

<sup>1</sup>H NMR Spectrum in CDCl<sub>3</sub>



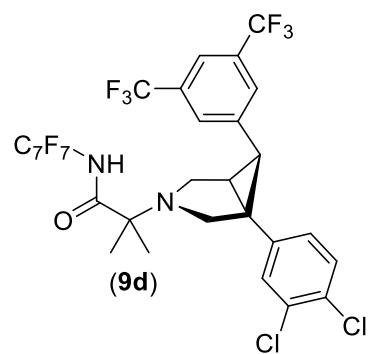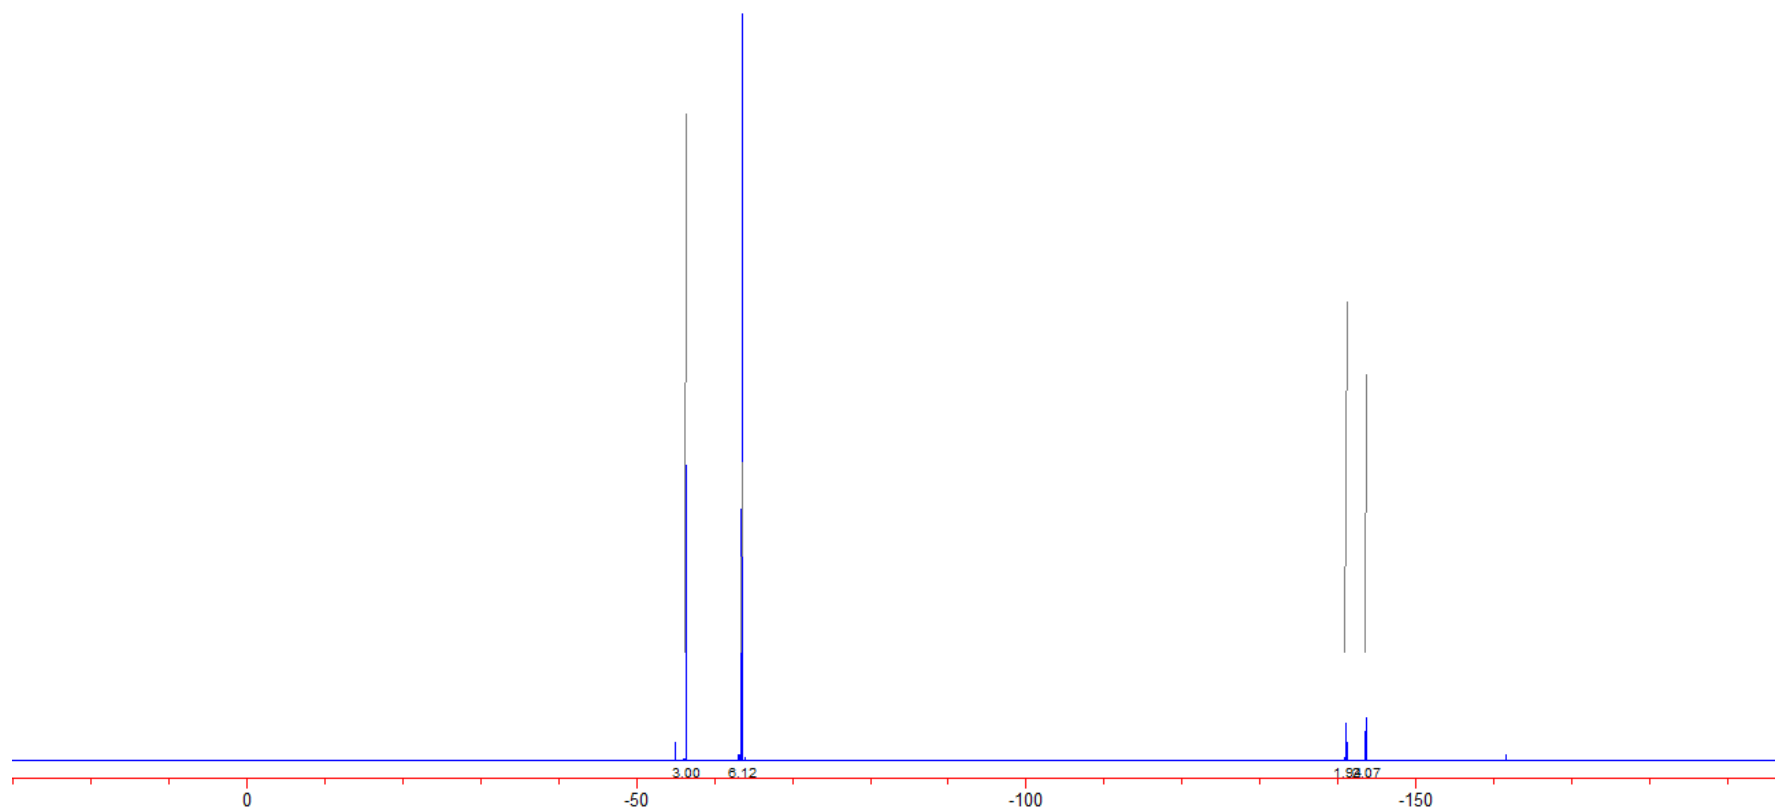

$^{19}\text{F}$  NMR Spectrum in  $\text{CDCl}_3$

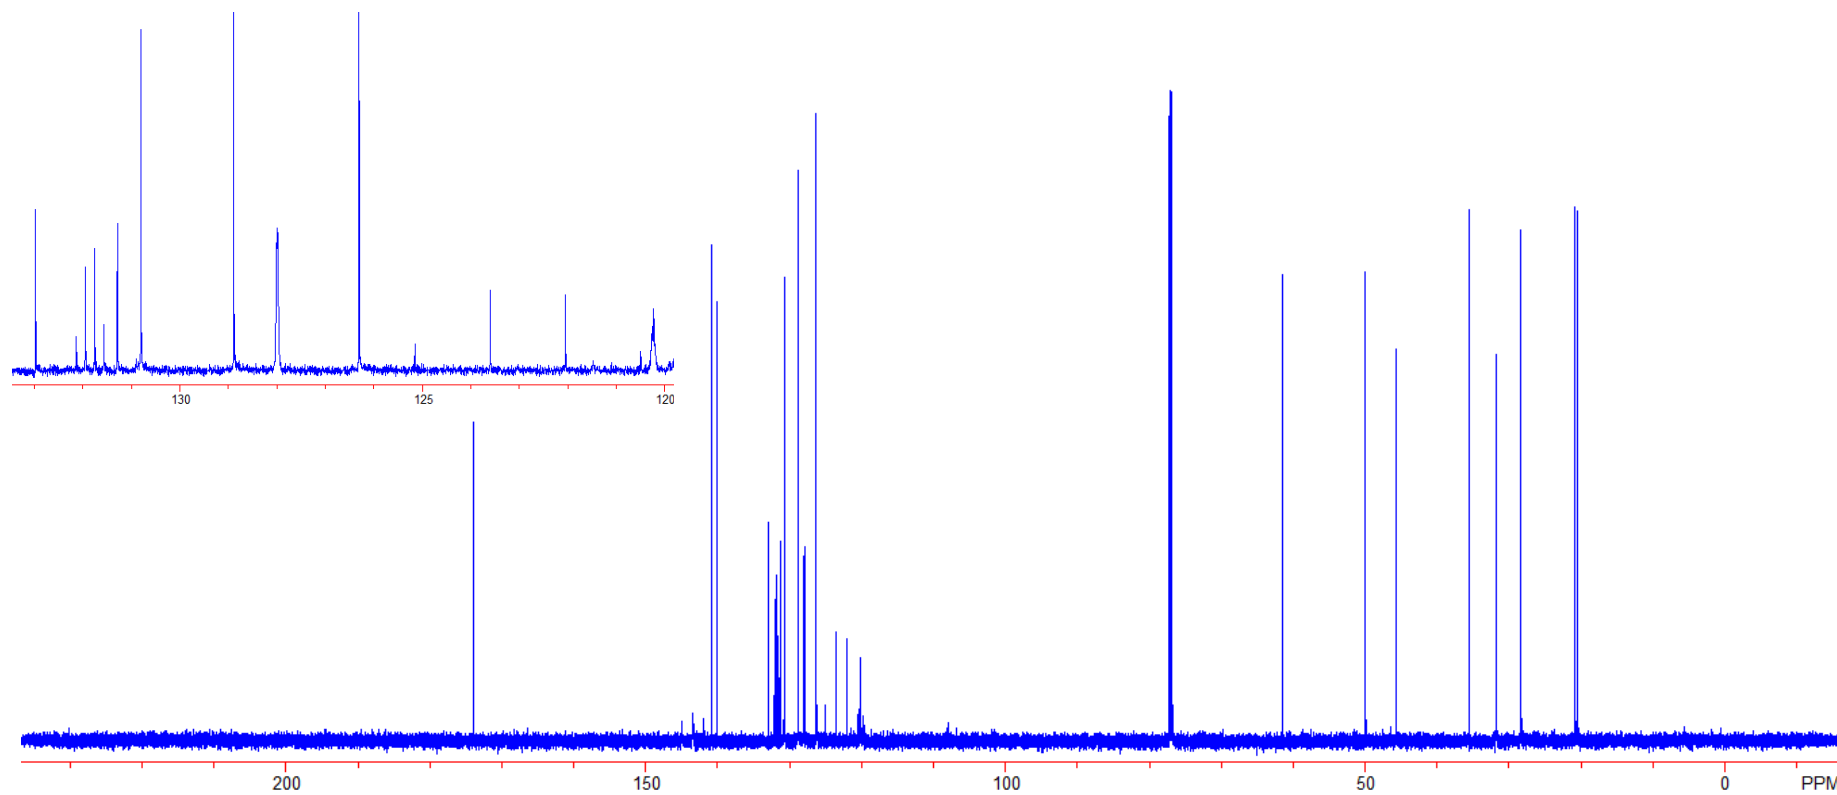

$^{13}\text{C}$  NMR Spectrum in  $\text{CDCl}_3$

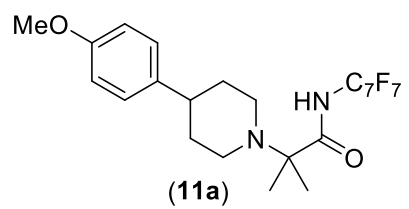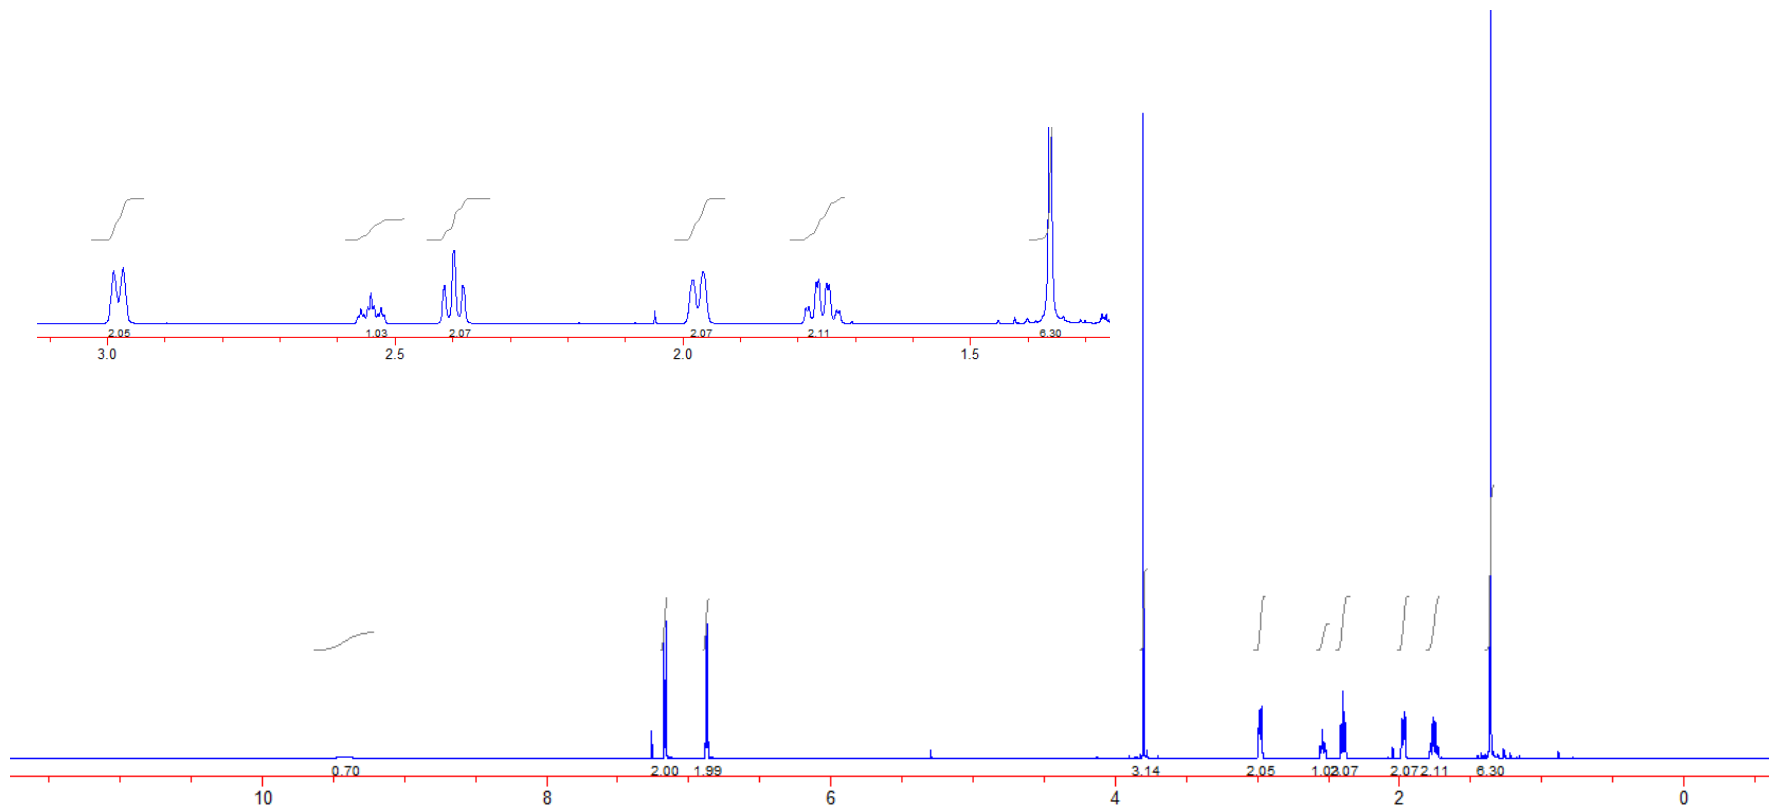

$^1\text{H}$  NMR Spectrum in  $\text{CDCl}_3$

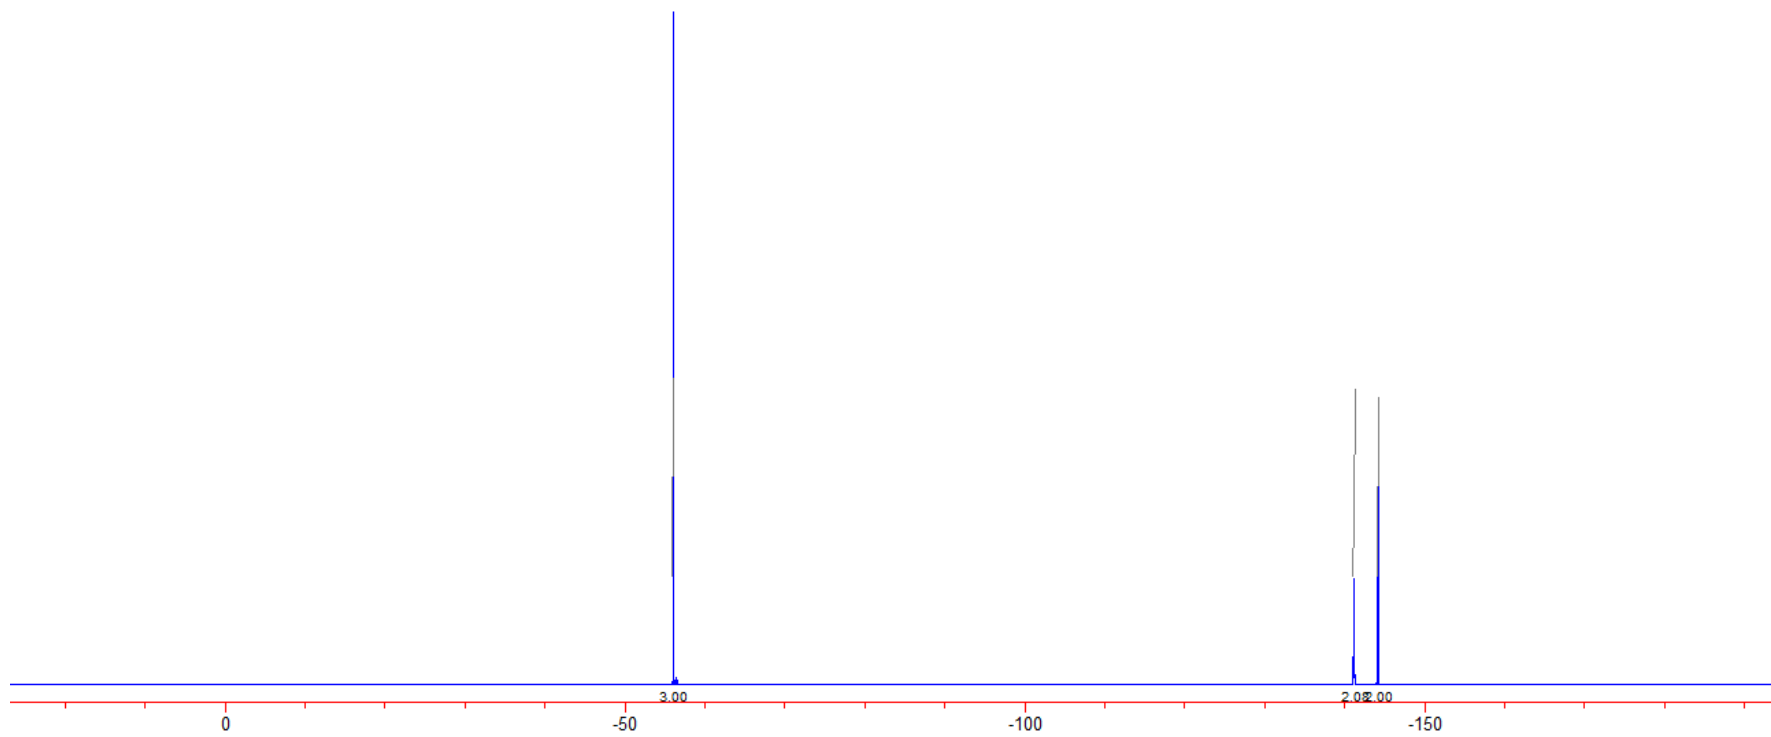

$^{19}\text{F}$  NMR Spectrum in  $\text{CDCl}_3$

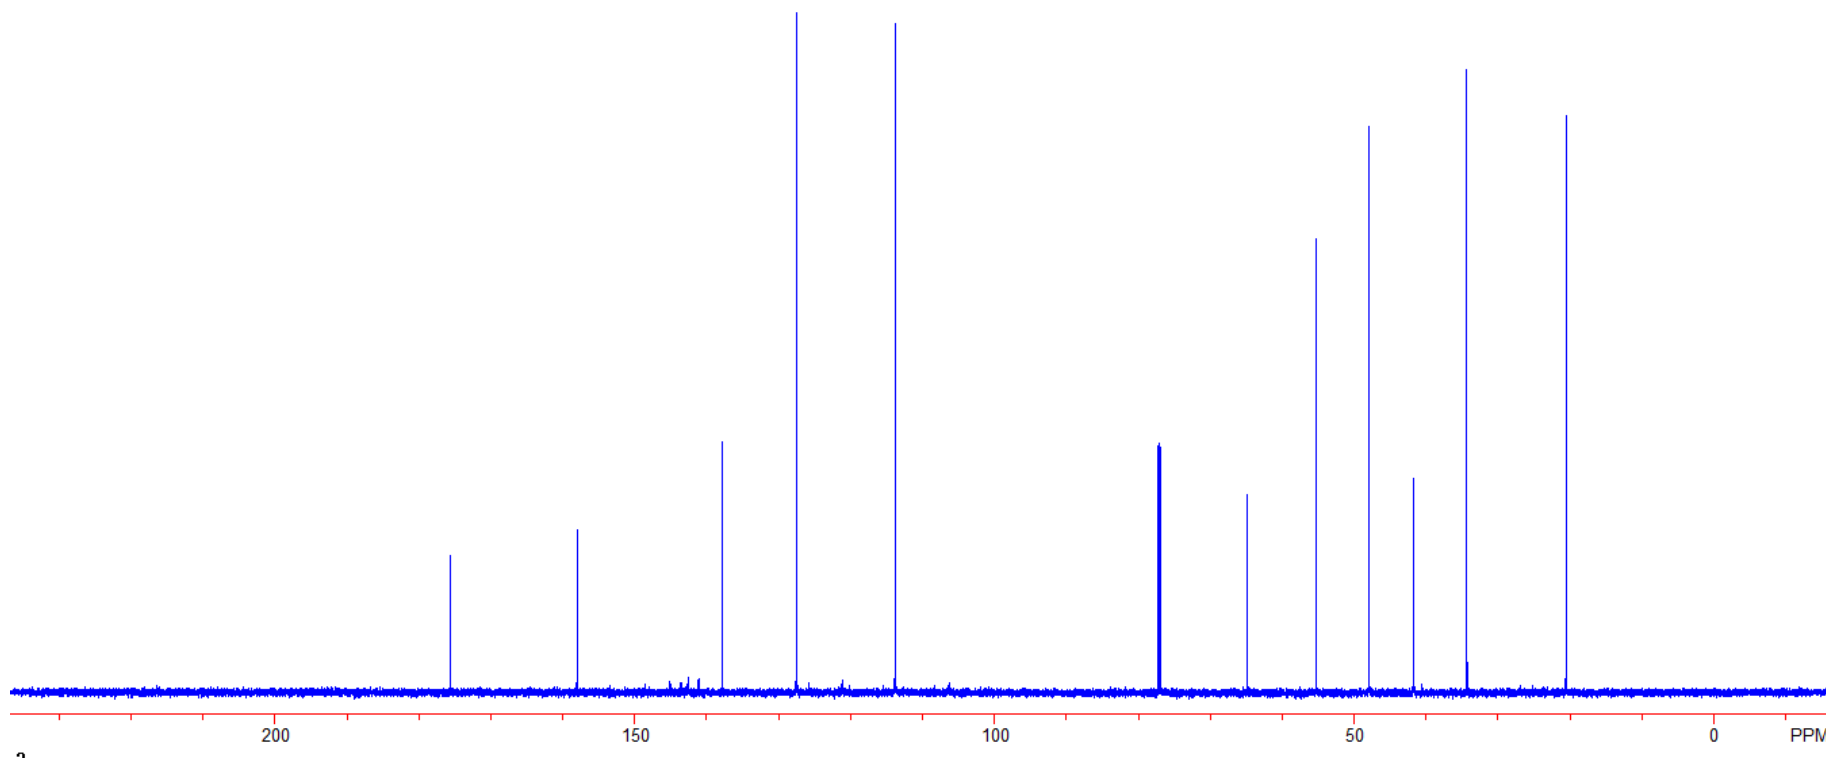

$^{13}\text{C}$  NMR Spectrum in  $\text{CDCl}_3$

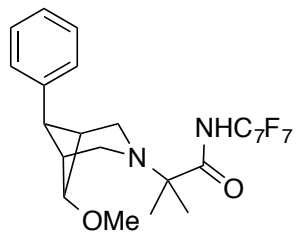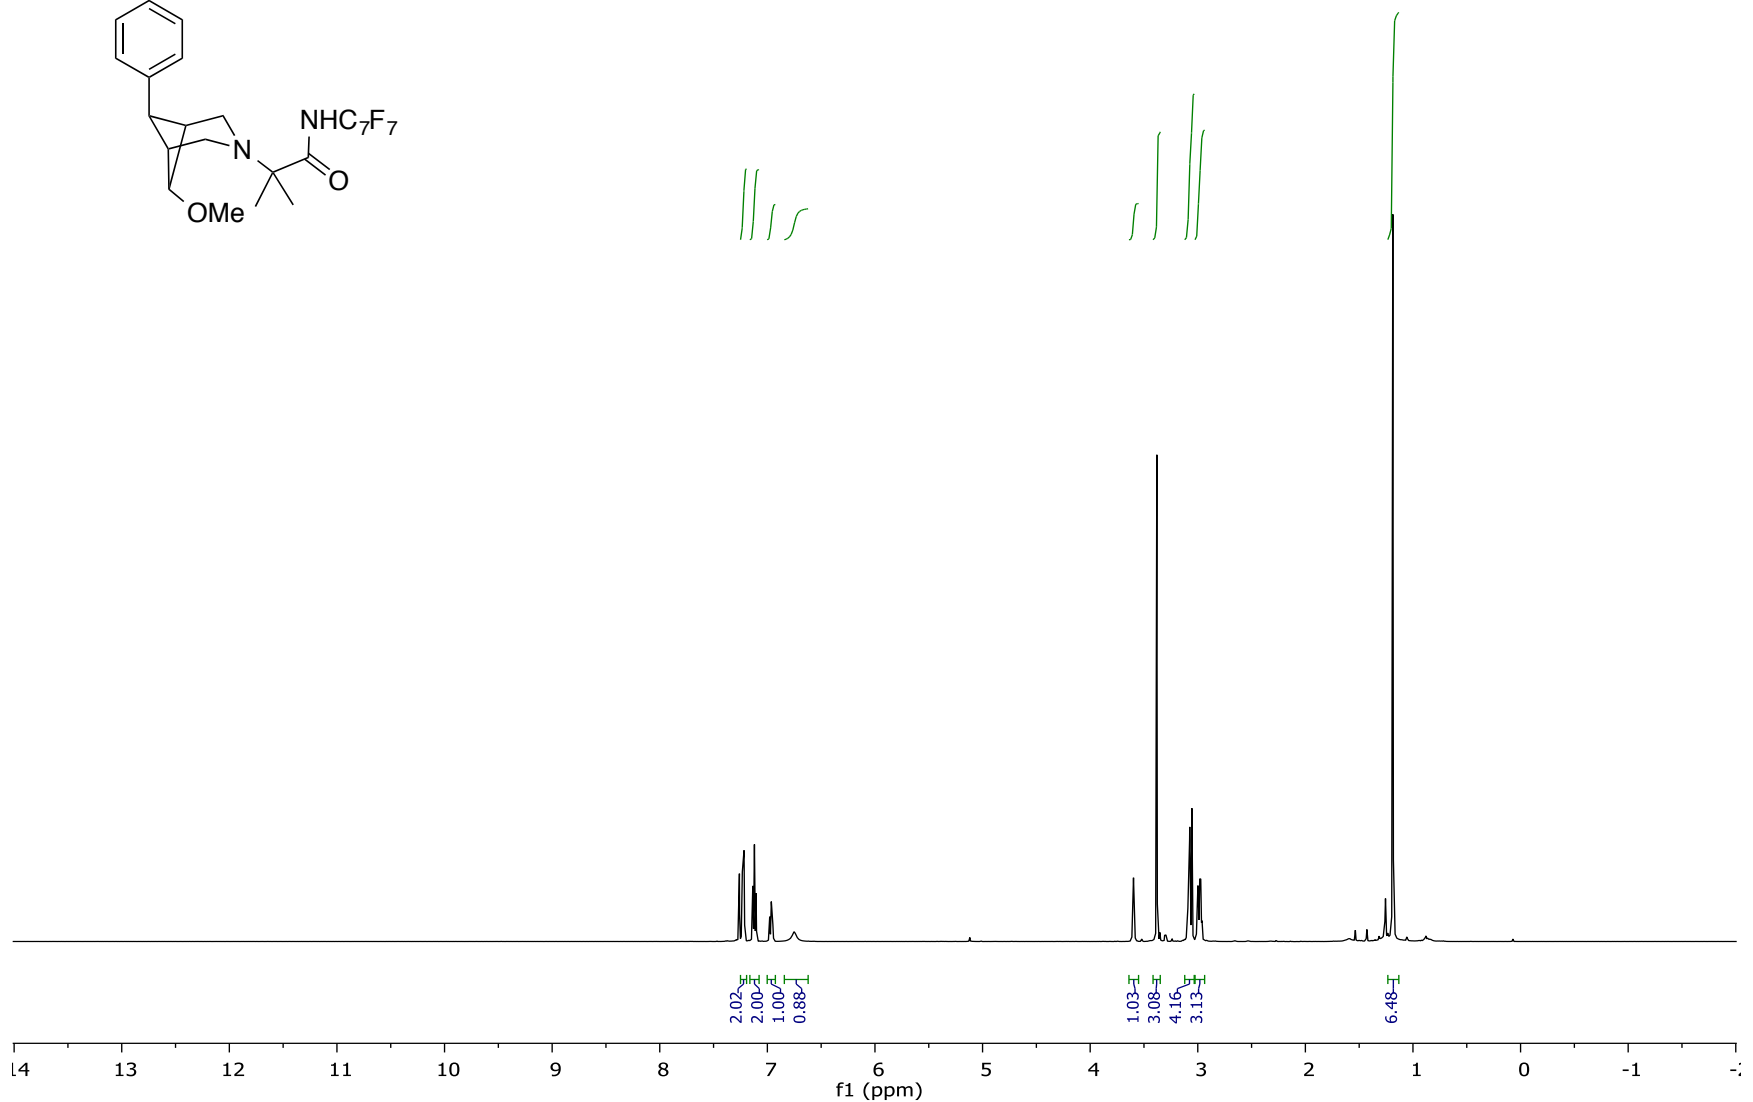

<sup>1</sup>H NMR Spectrum of **11b** in CDCl<sub>3</sub>

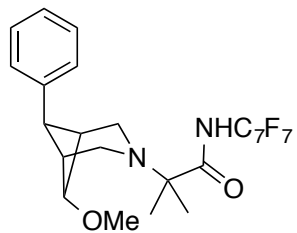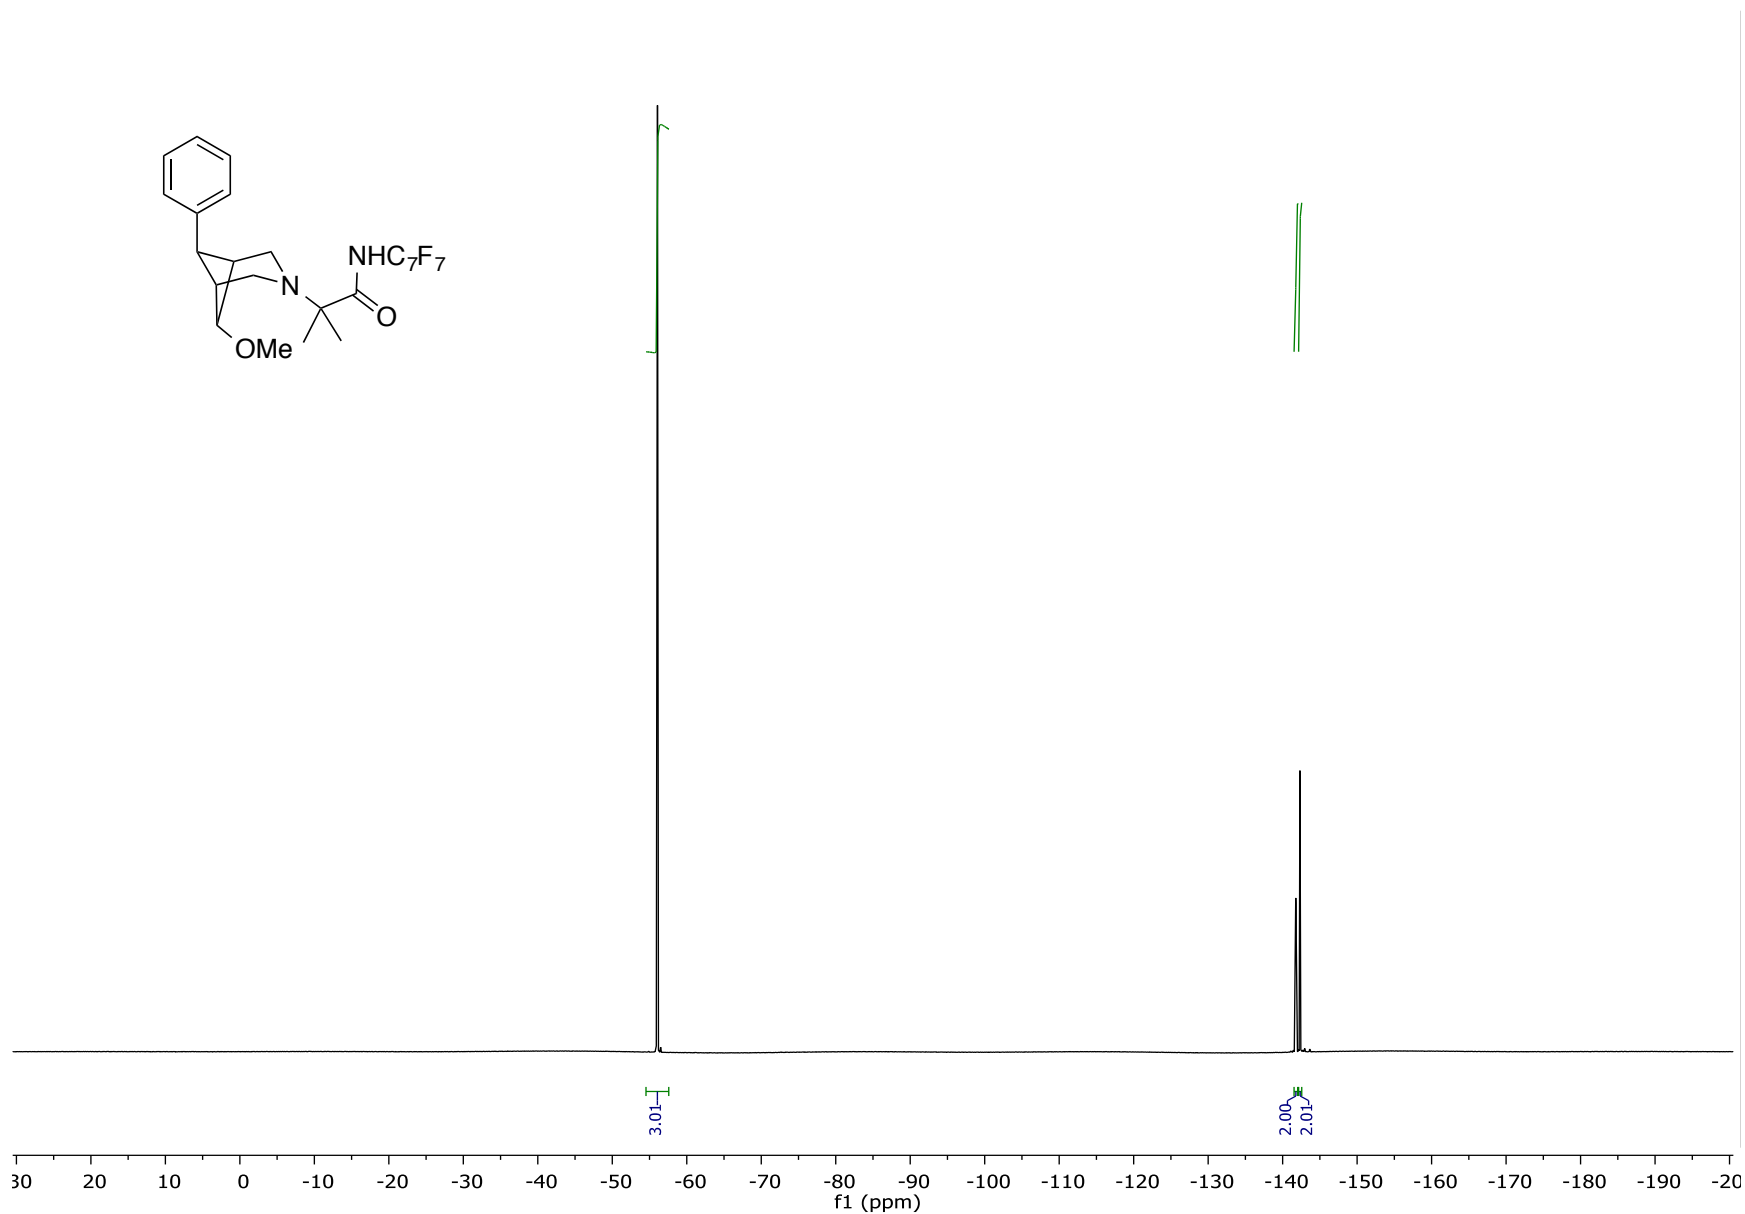

<sup>19</sup>F NMR Spectrum of **11b** in CDCl<sub>3</sub>

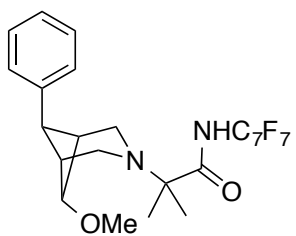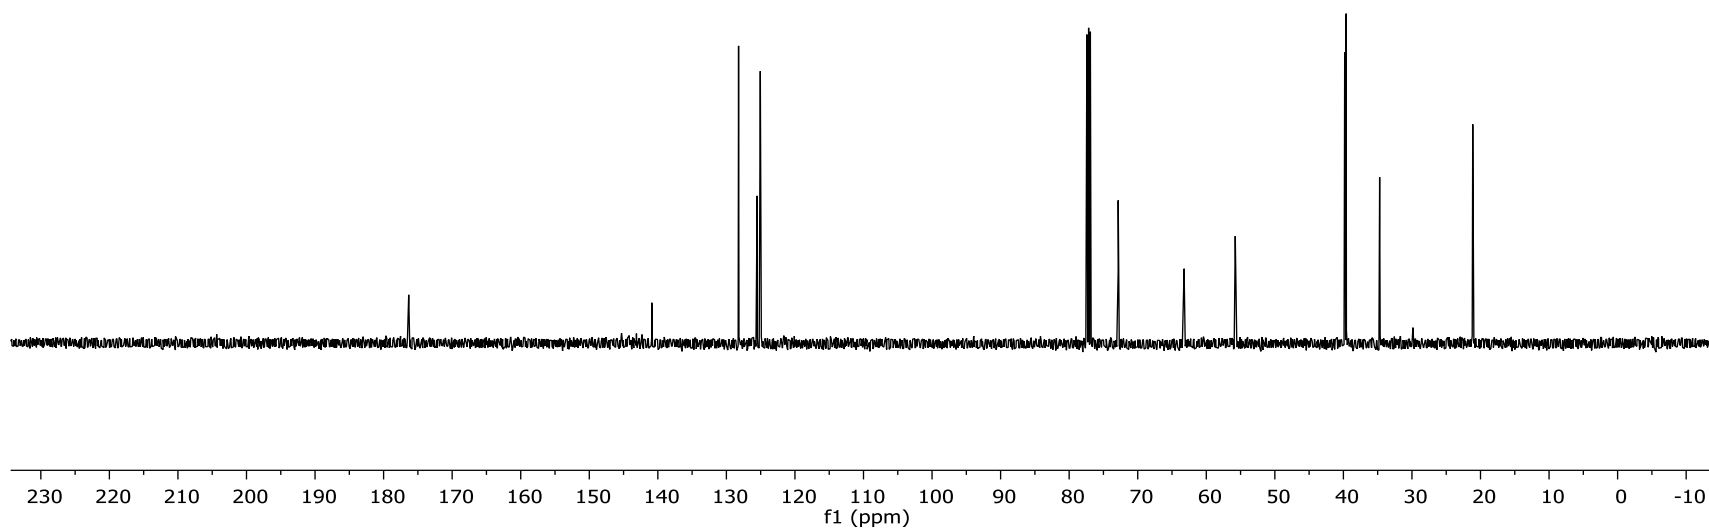

<sup>13</sup>C NMR Spectrum of **11b** in CDCl<sub>3</sub>



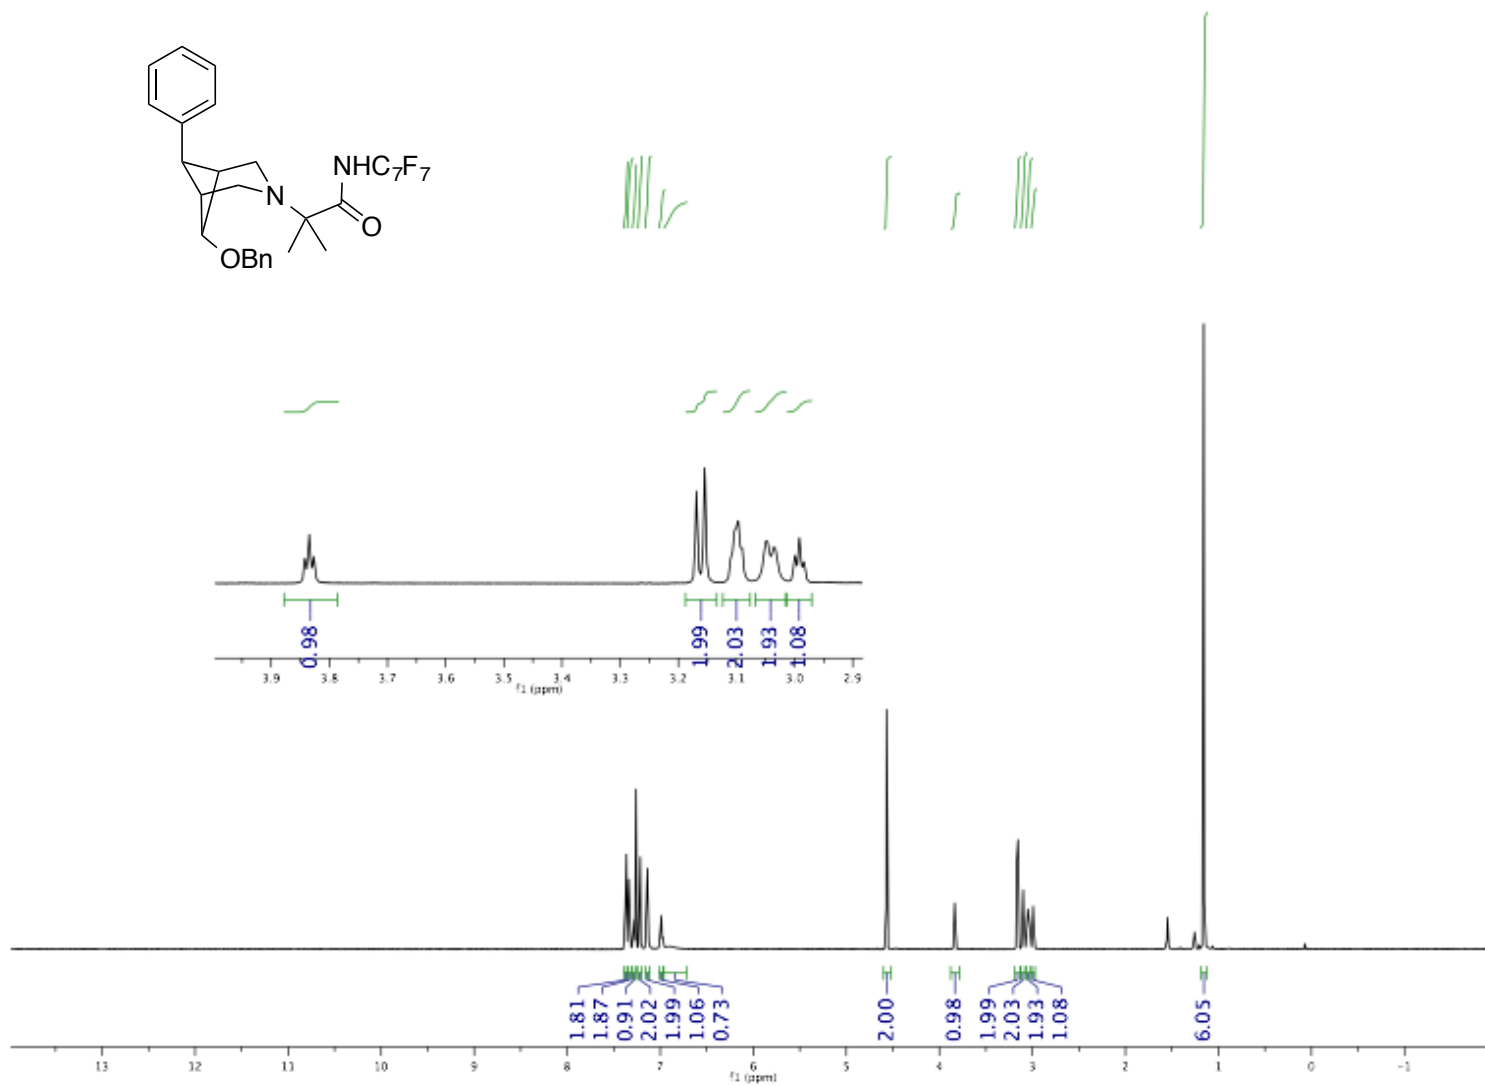

$^1\text{H}$  NMR Spectrum of **11c** in  $\text{CDCl}_3$

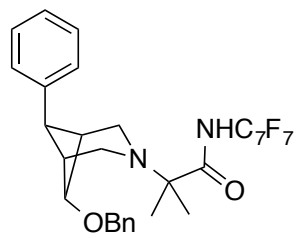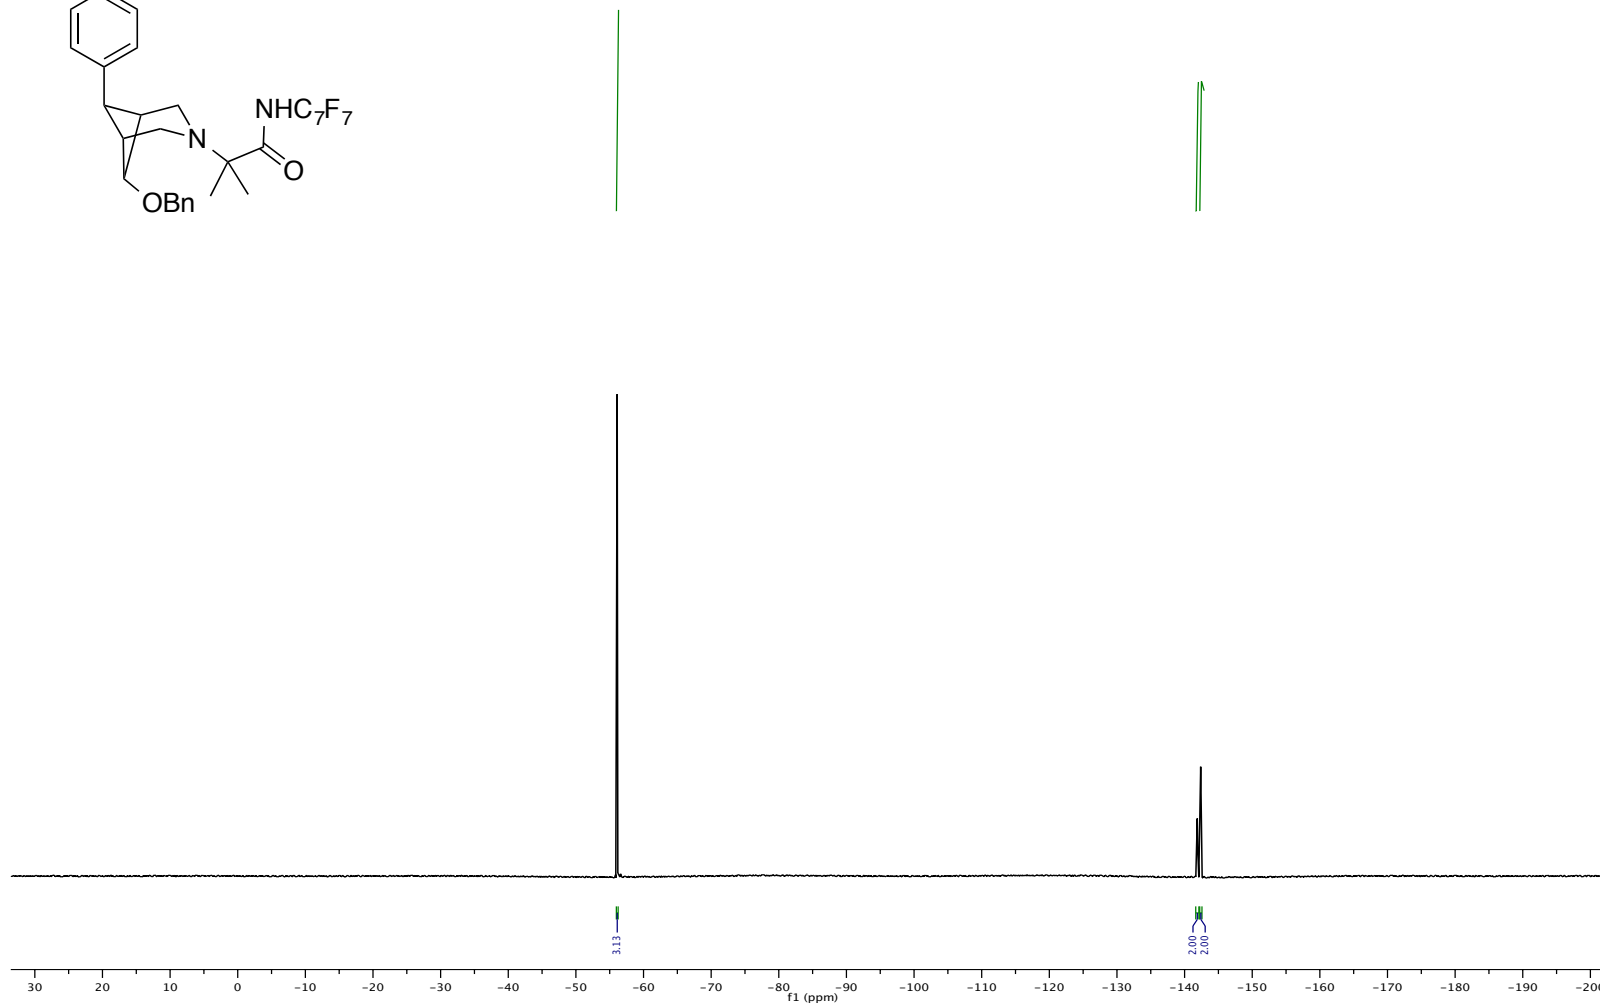

<sup>19</sup>F NMR Spectrum of **11c** in CDCl<sub>3</sub>

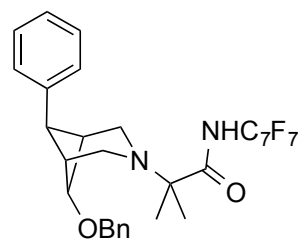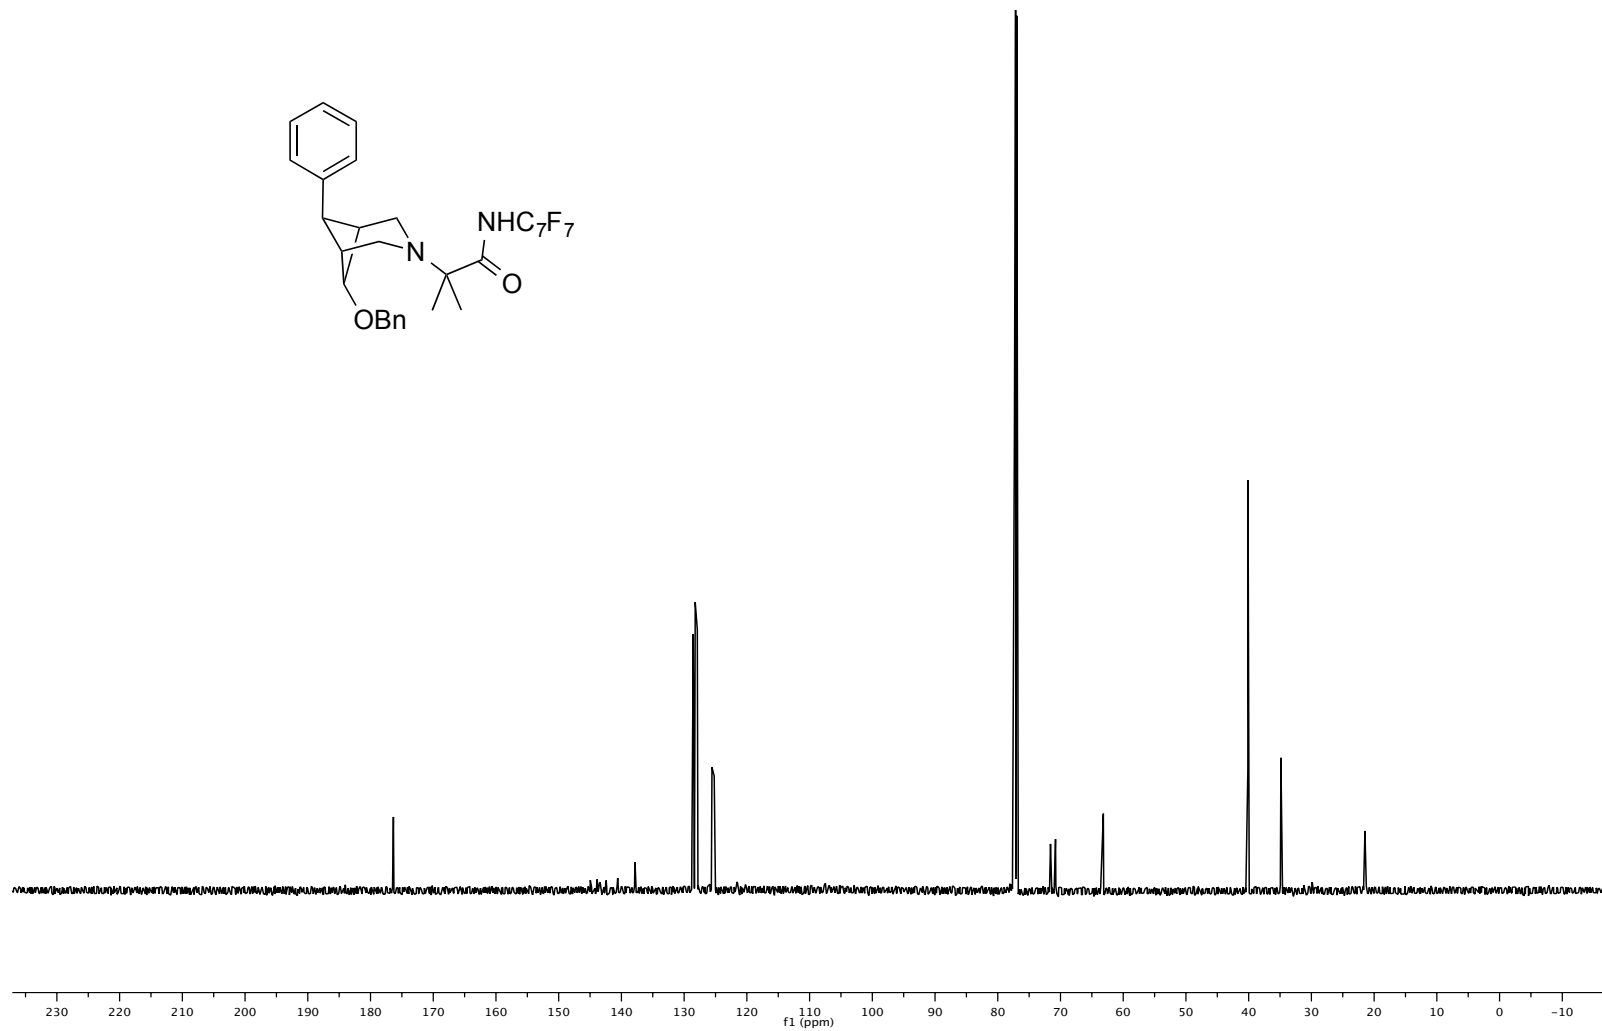

<sup>13</sup>C NMR Spectrum of **11c** in CDCl<sub>3</sub>

$(^1\text{H}-^{13}\text{C})$  HSQC of **11c** in  $\text{CDCl}_3$

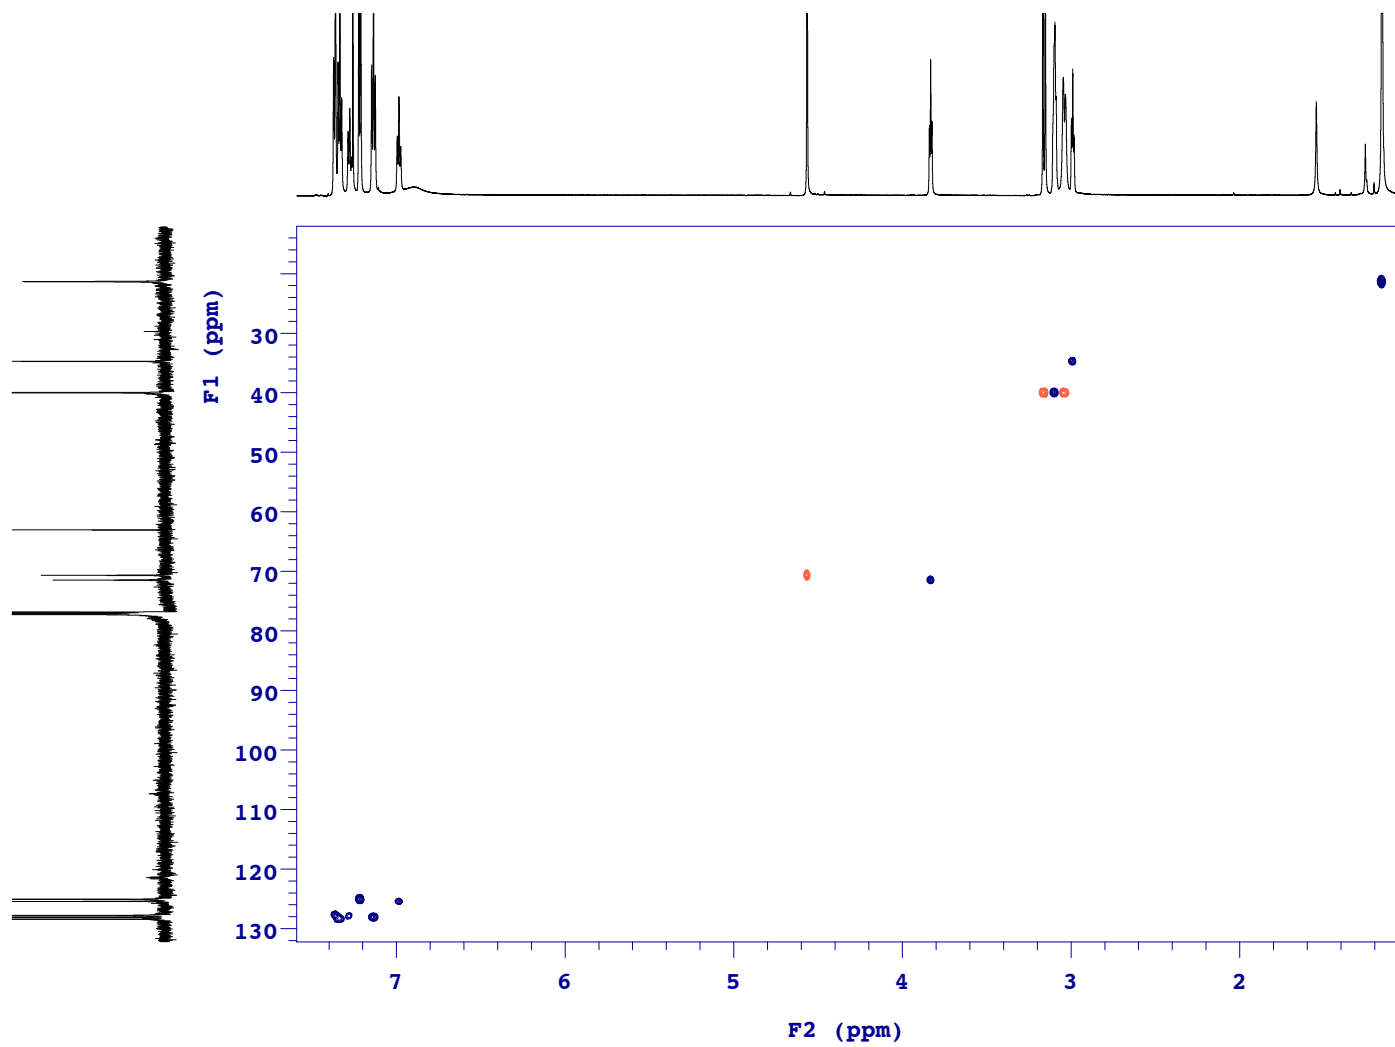

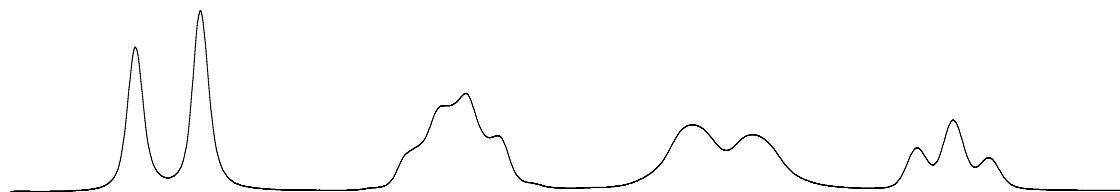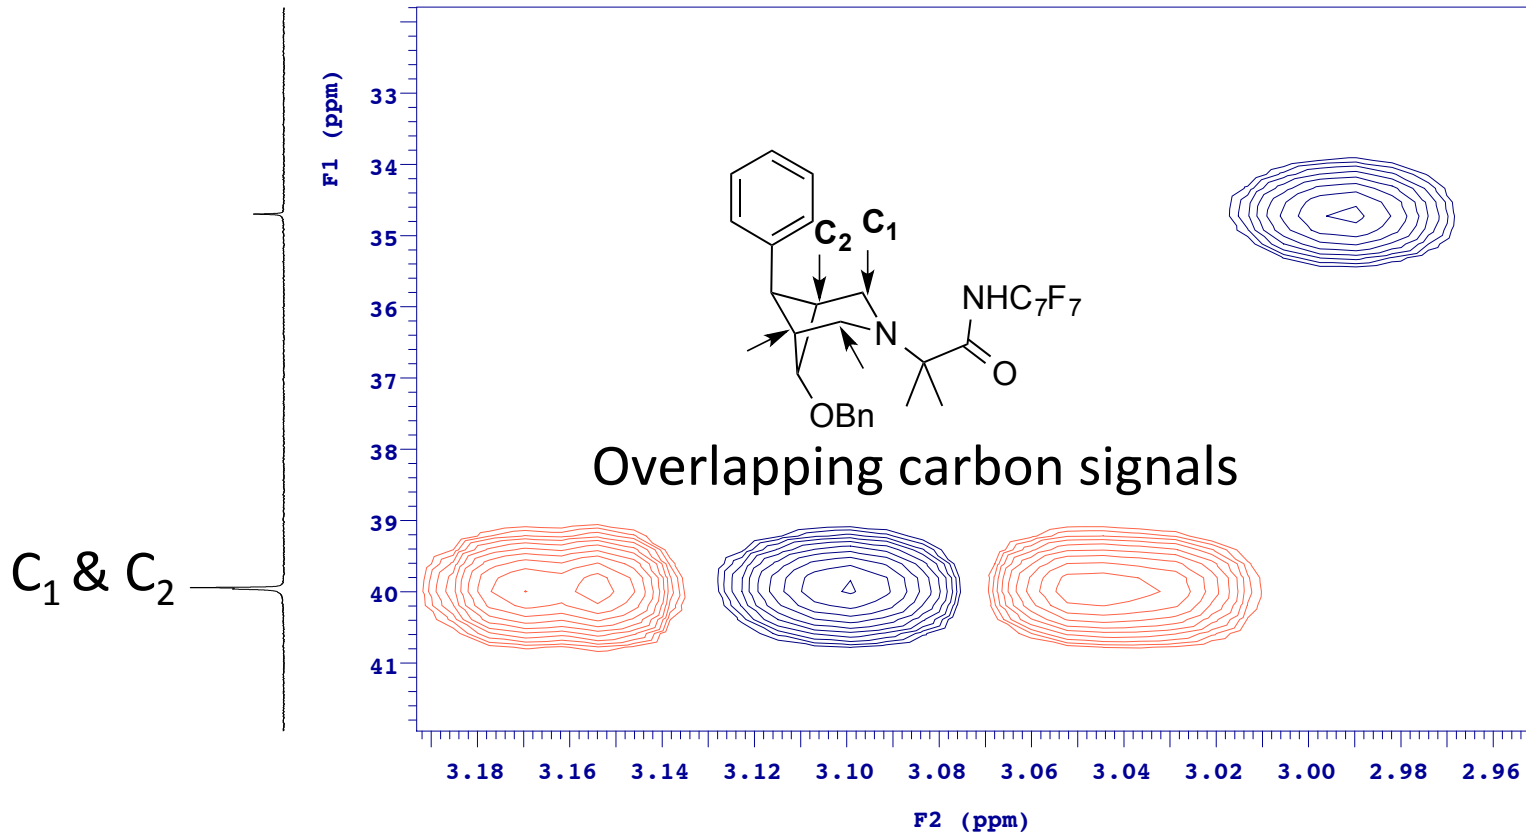

$(^1\text{H}-^{13}\text{C})$  HMBC of **11c** in  $\text{CDCl}_3$

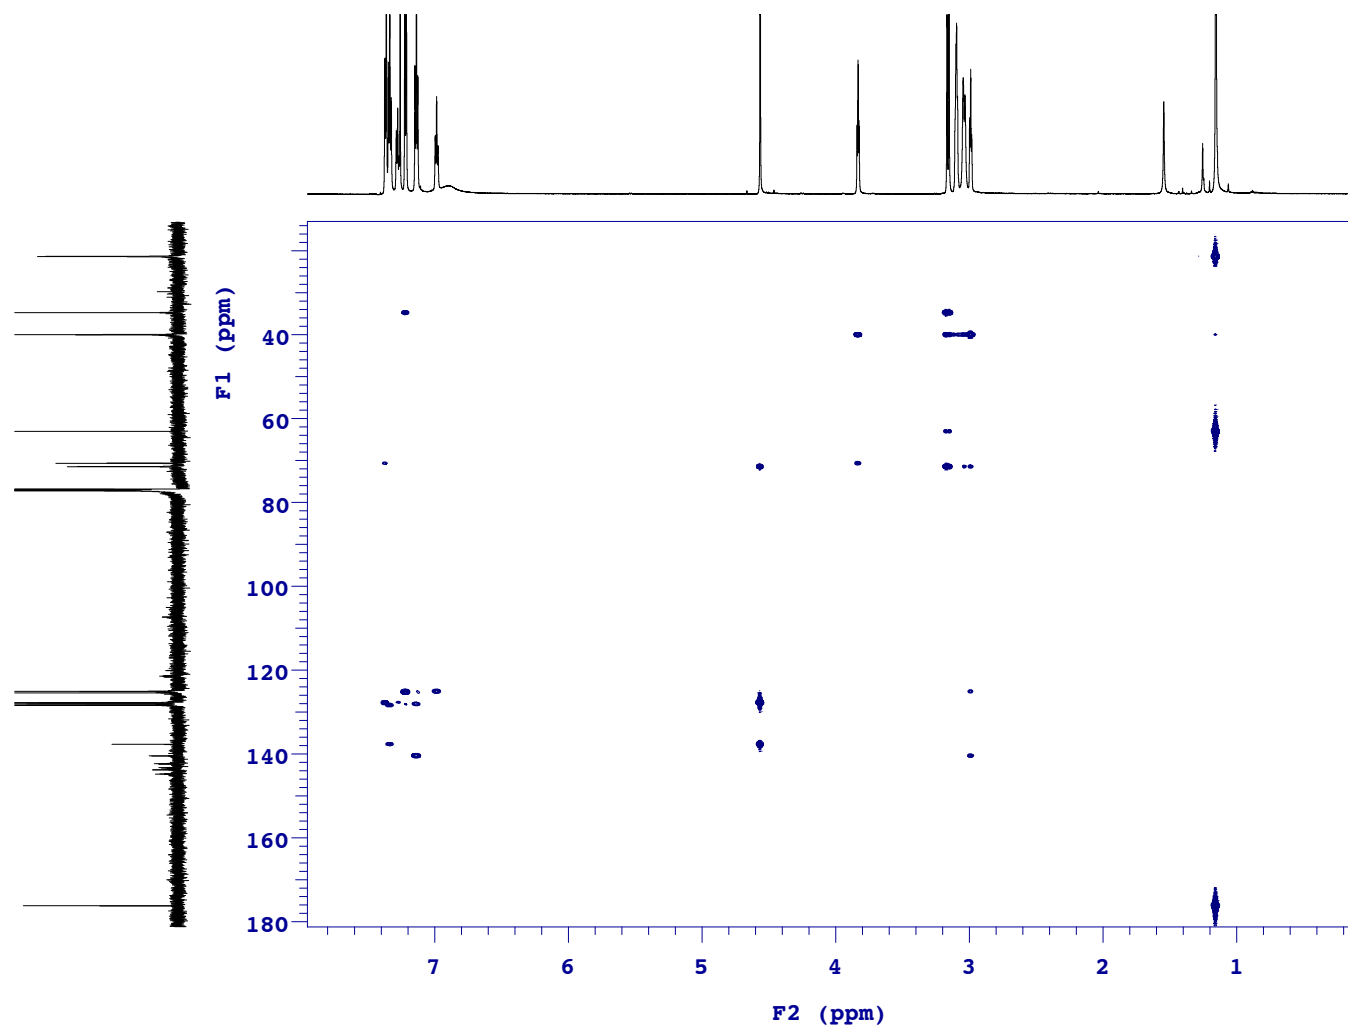

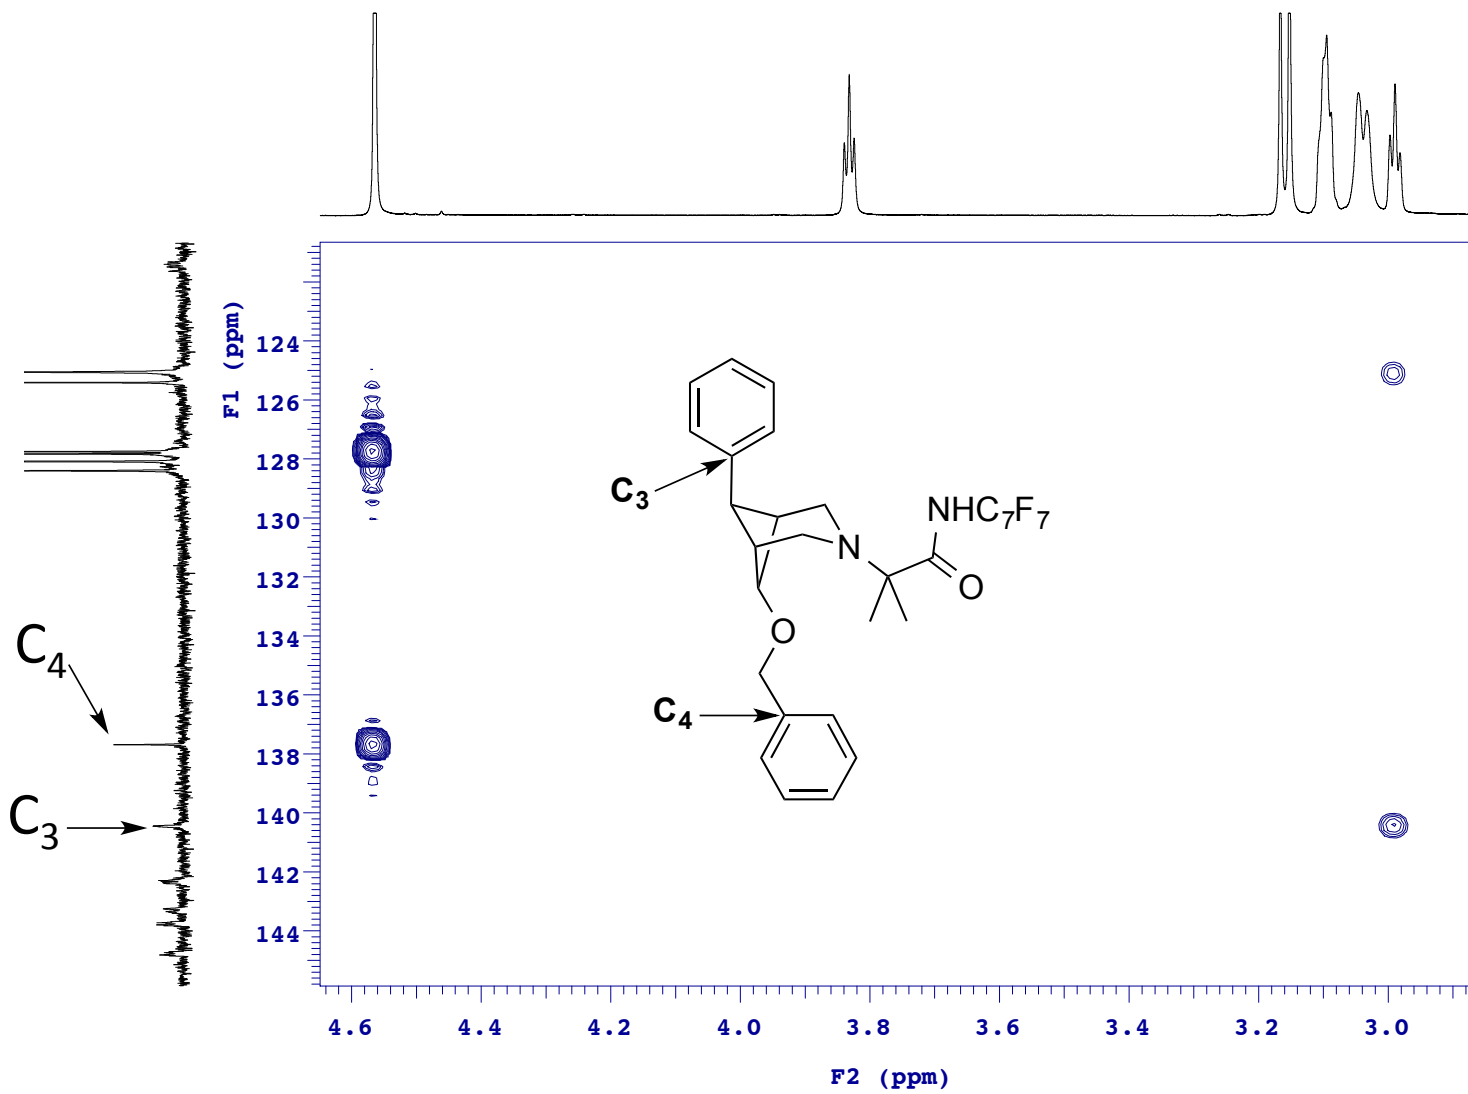

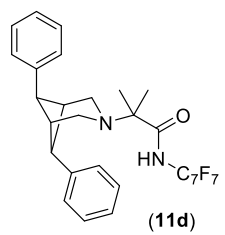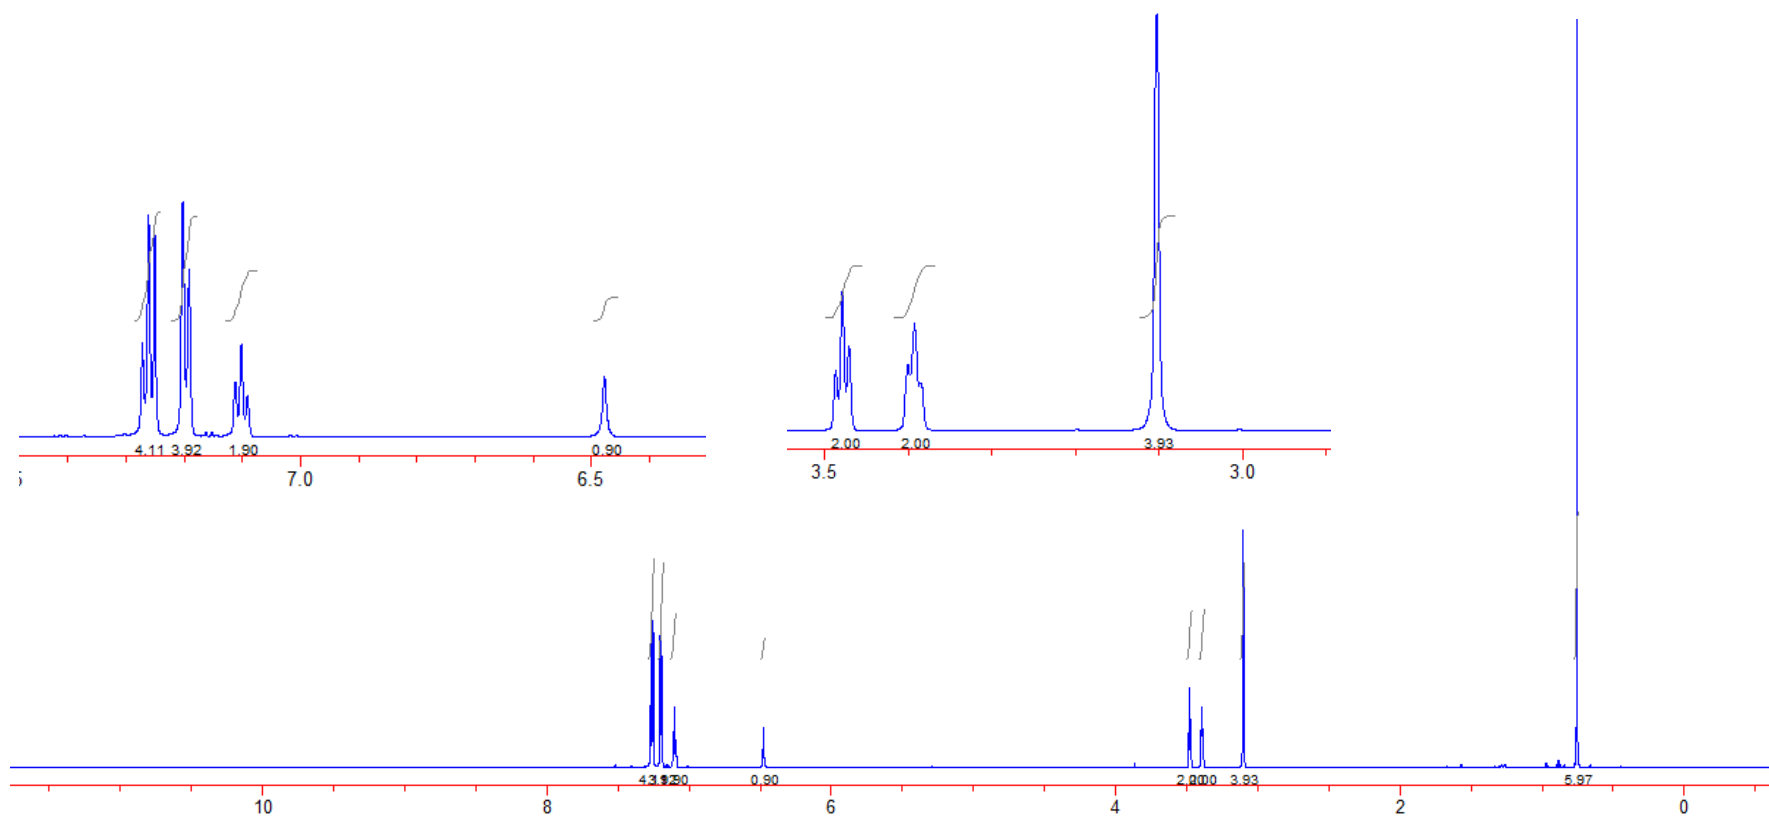

$^1\text{H}$  NMR Spectrum in  $\text{CDCl}_3$



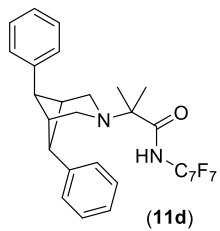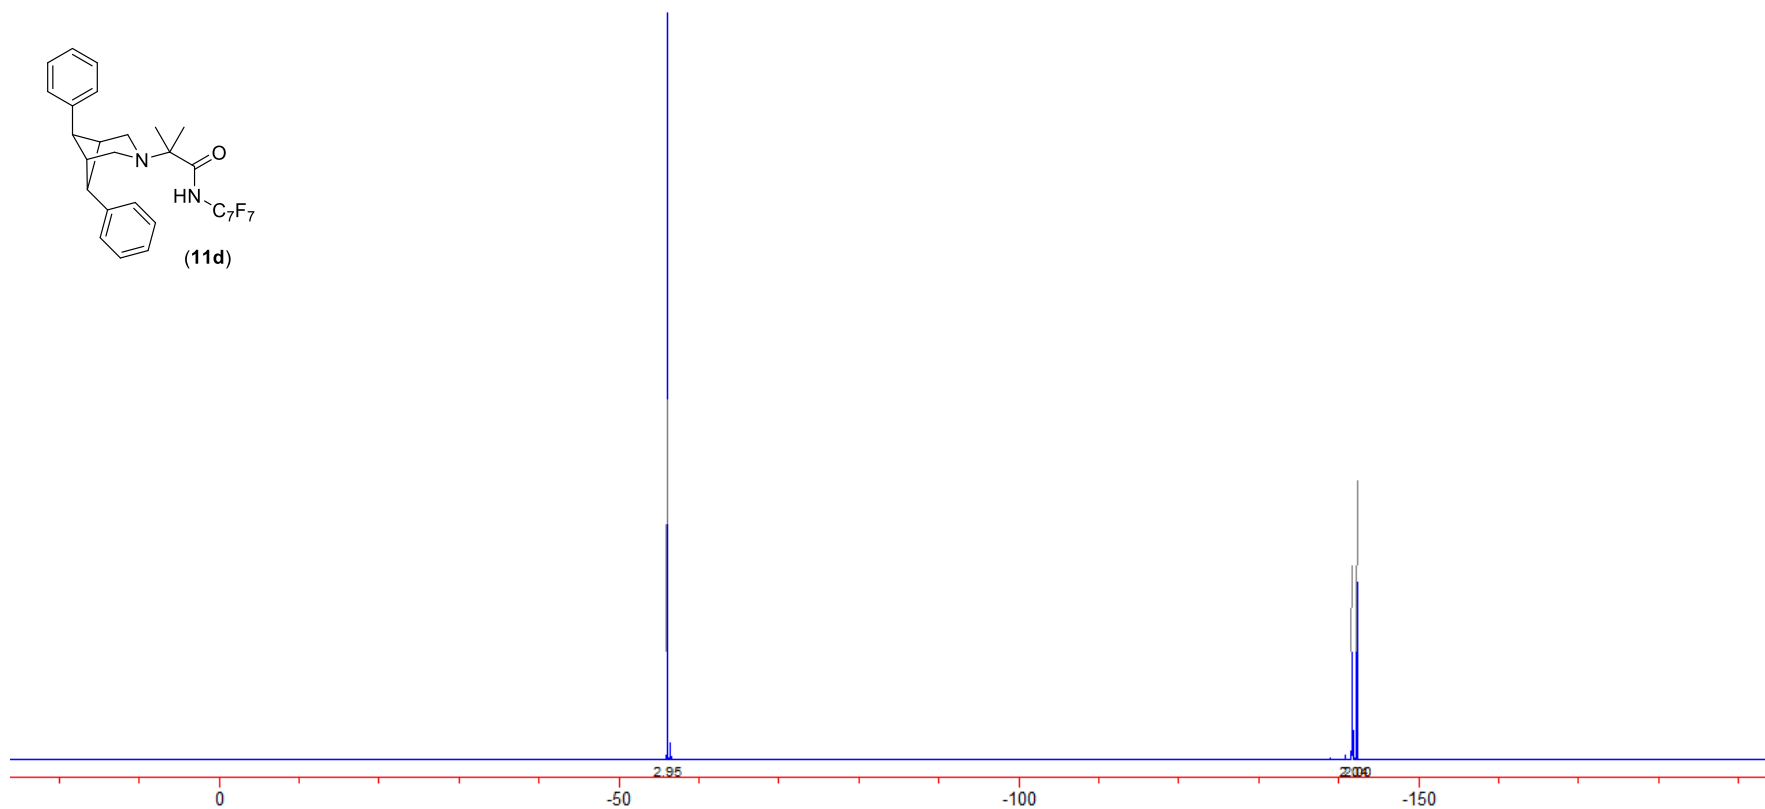

$^{19}\text{F}$  NMR Spectrum in  $\text{CDCl}_3$

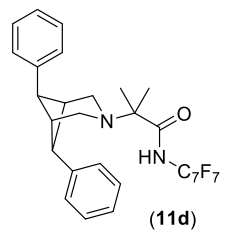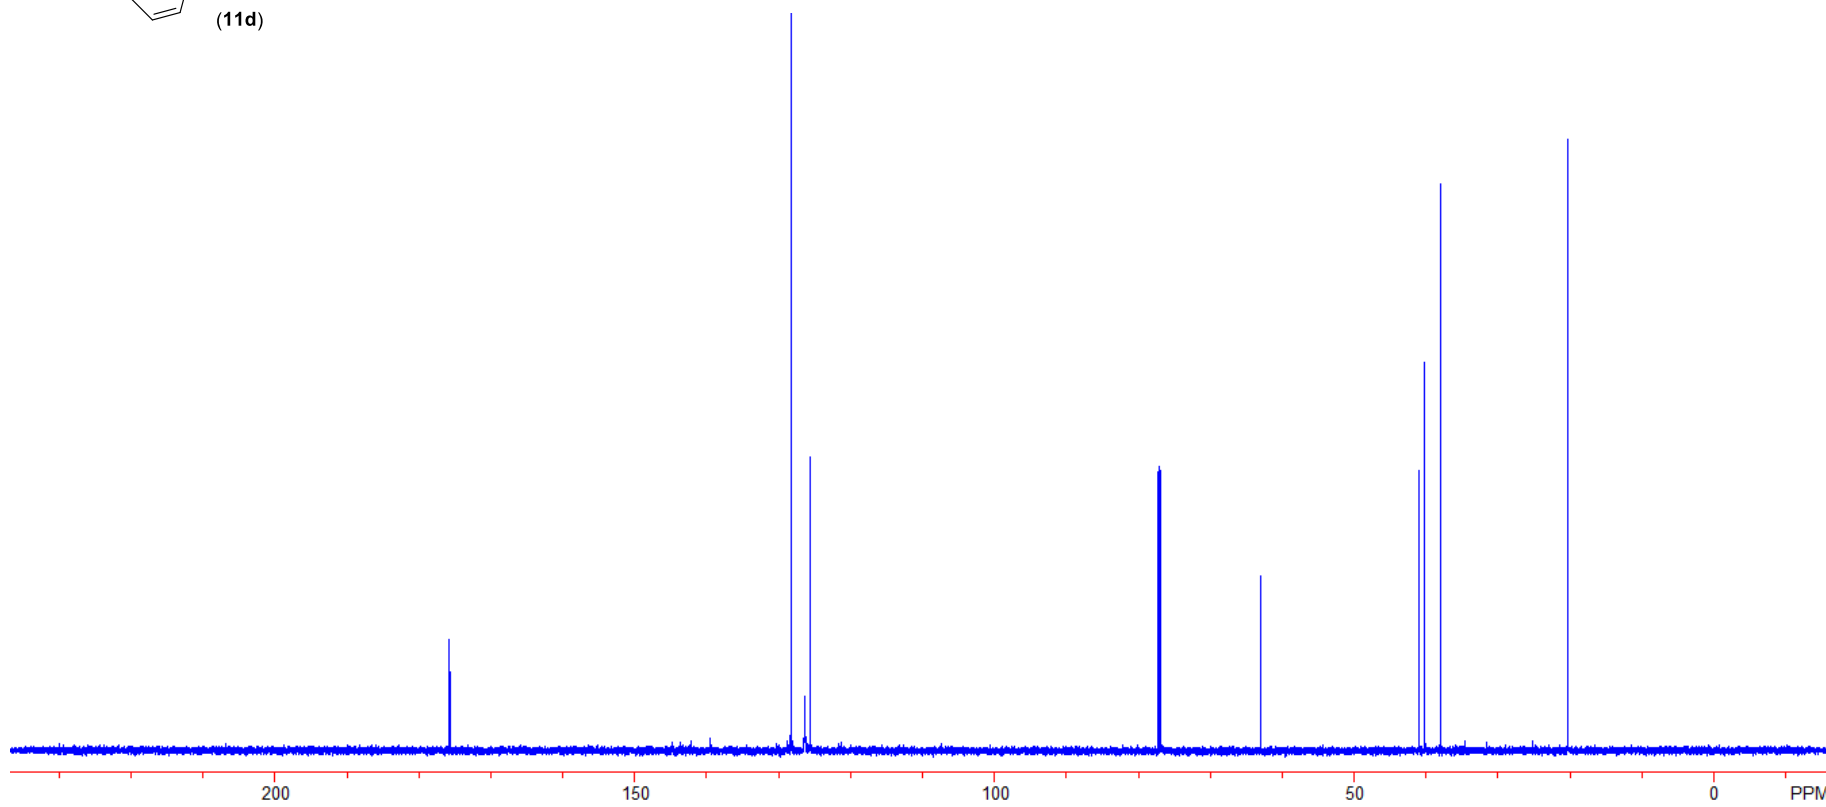

$^{13}\text{C}$  NMR Spectrum in  $\text{CDCl}_3$

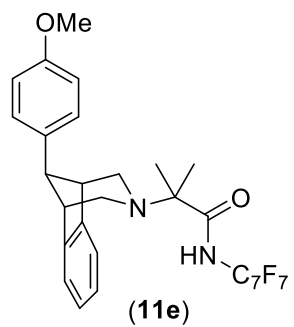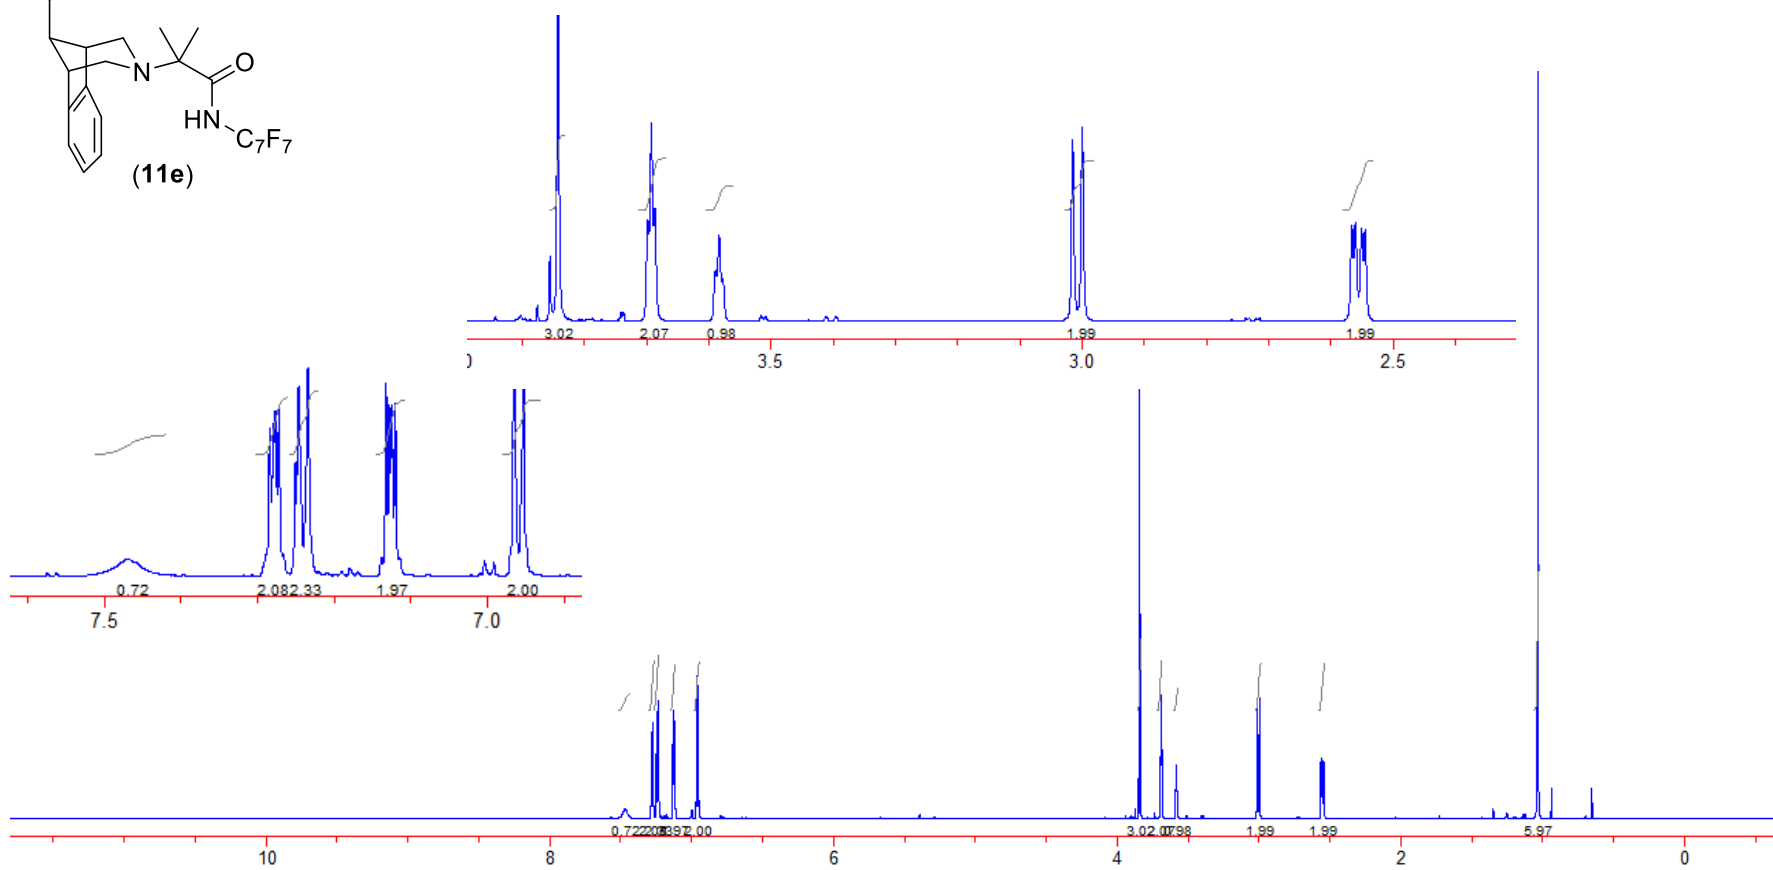

$^1\text{H}$  NMR Spectrum in  $\text{CDCl}_3$

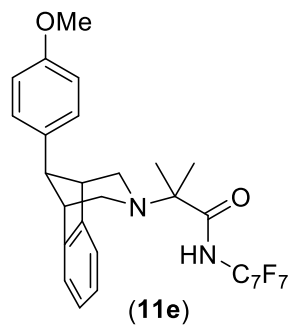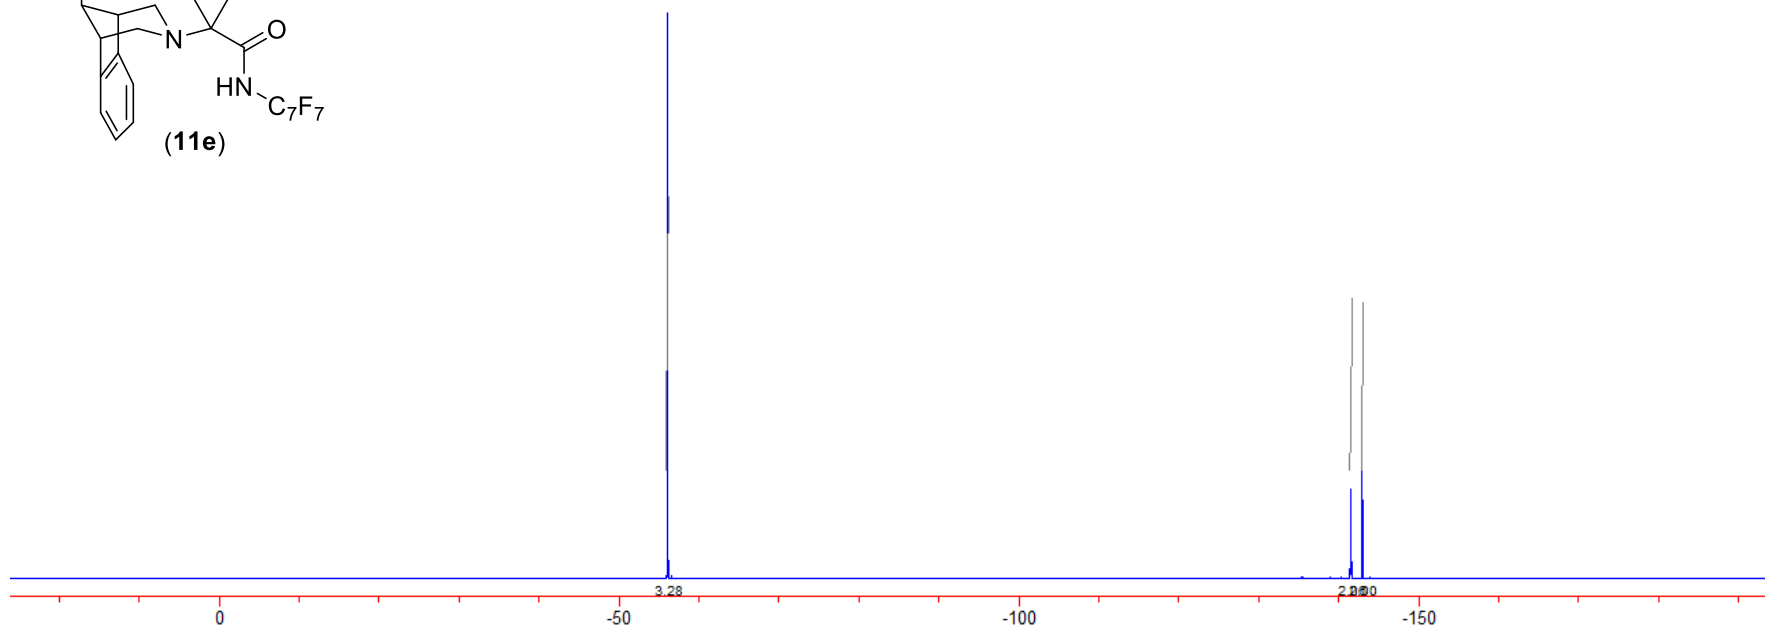

<sup>19</sup>F NMR Spectrum in CDCl<sub>3</sub>

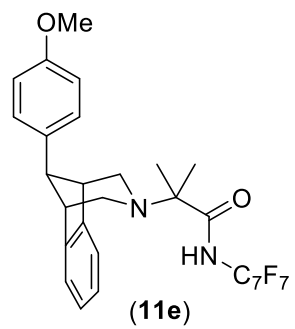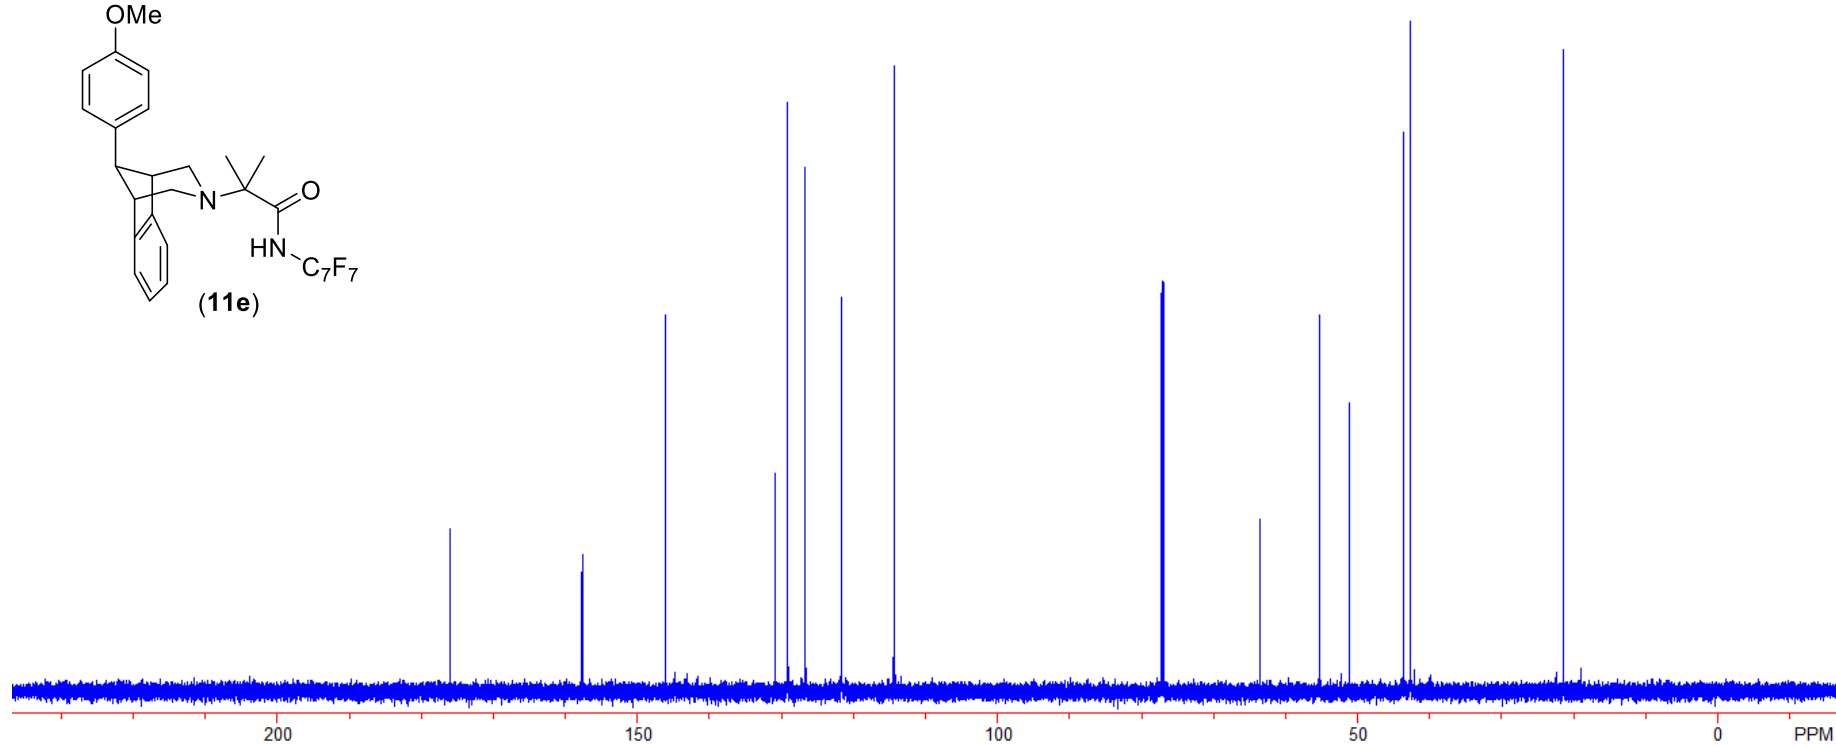

$^{13}\text{C}$  NMR Spectrum in  $\text{CDCl}_3$

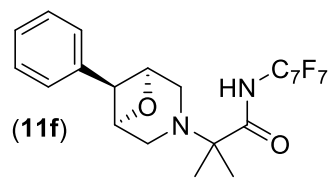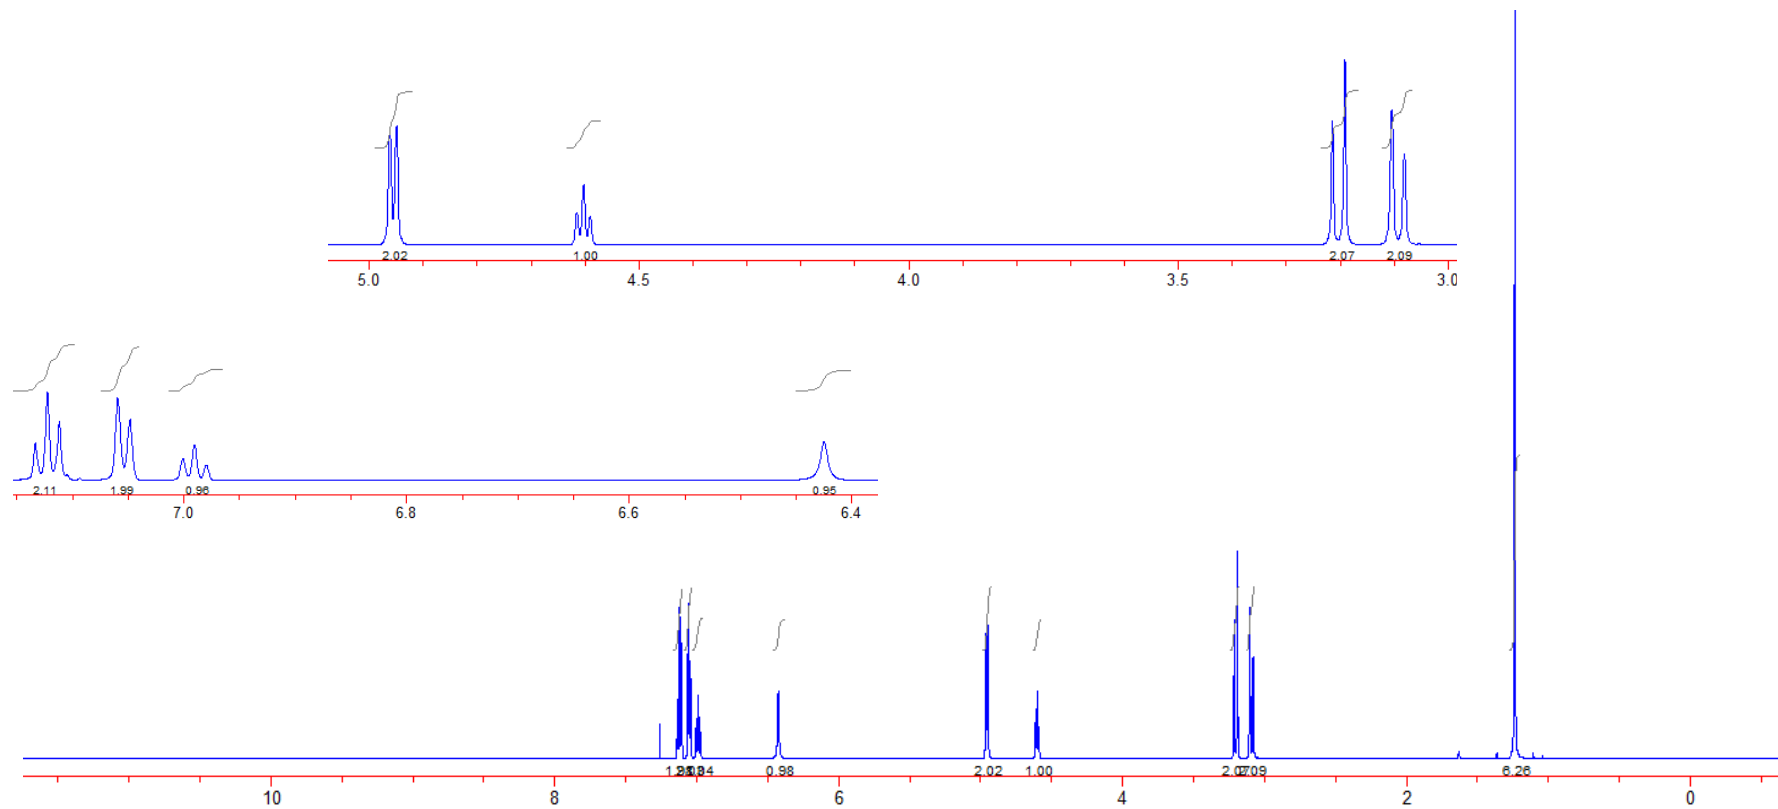

<sup>1</sup>H NMR Spectrum in CDCl<sub>3</sub>

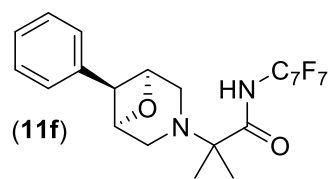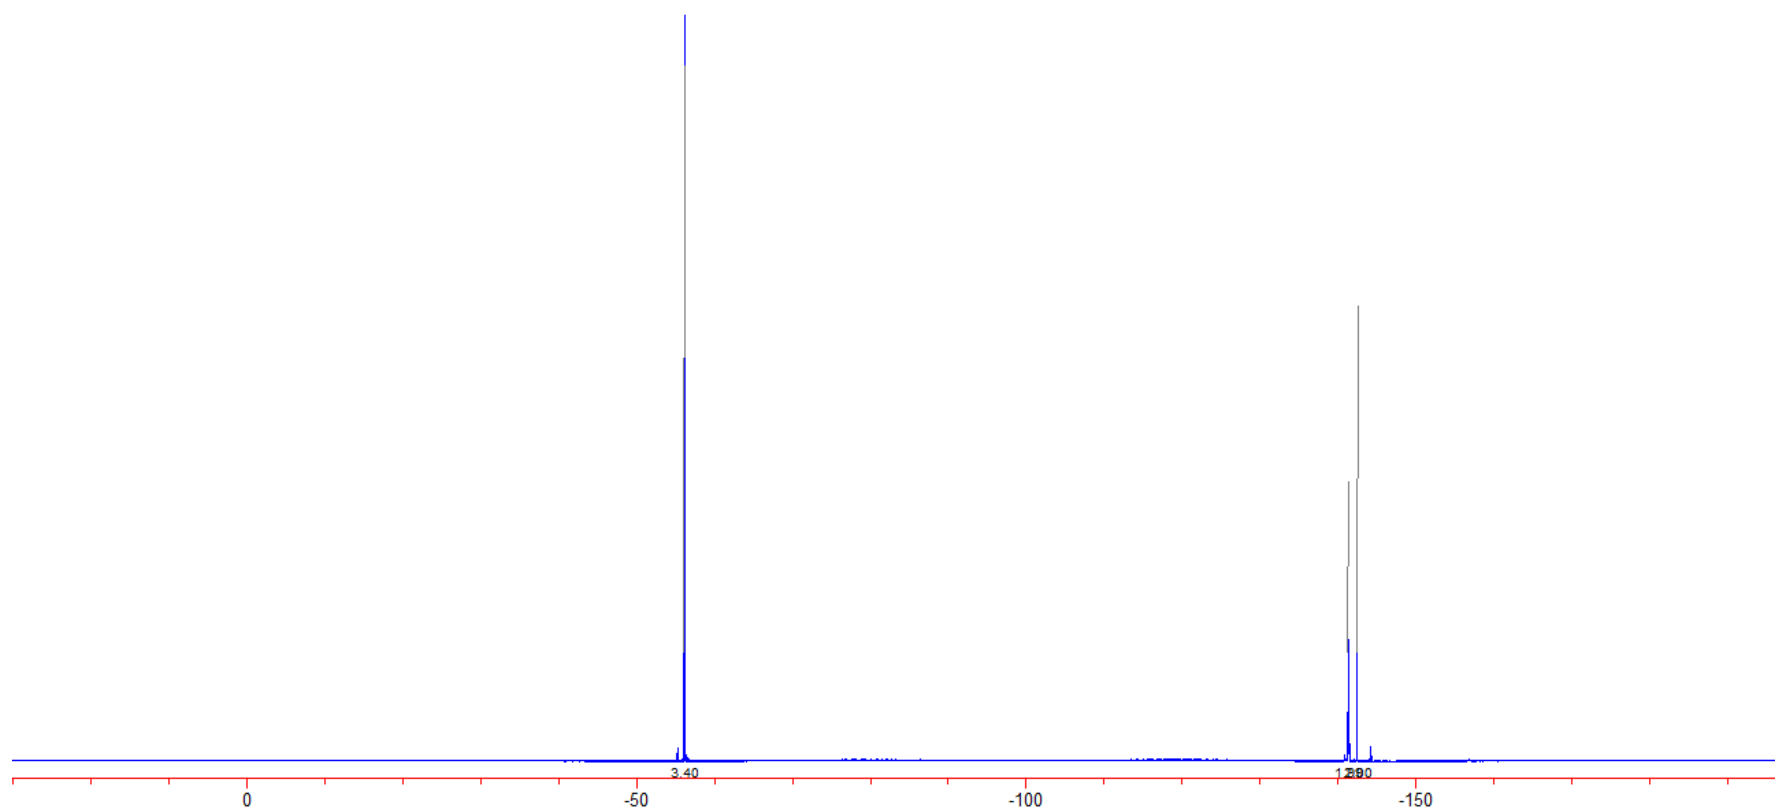

<sup>19</sup>F NMR Spectrum in CDCl<sub>3</sub>

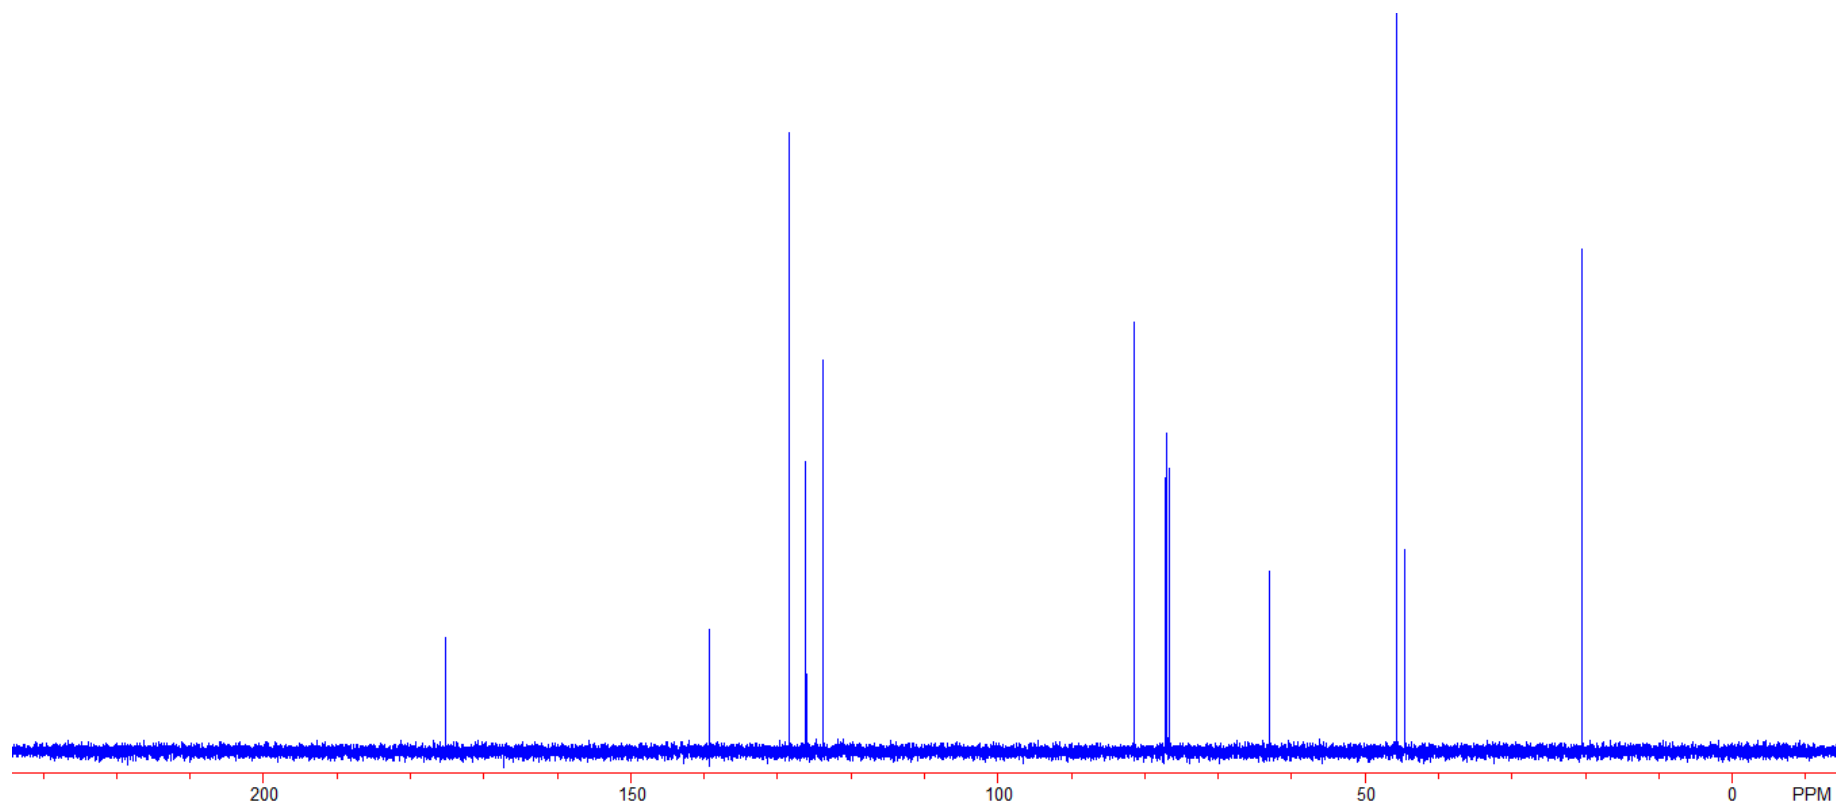

$^{13}\text{C}$  NMR Spectrum in  $\text{CDCl}_3$



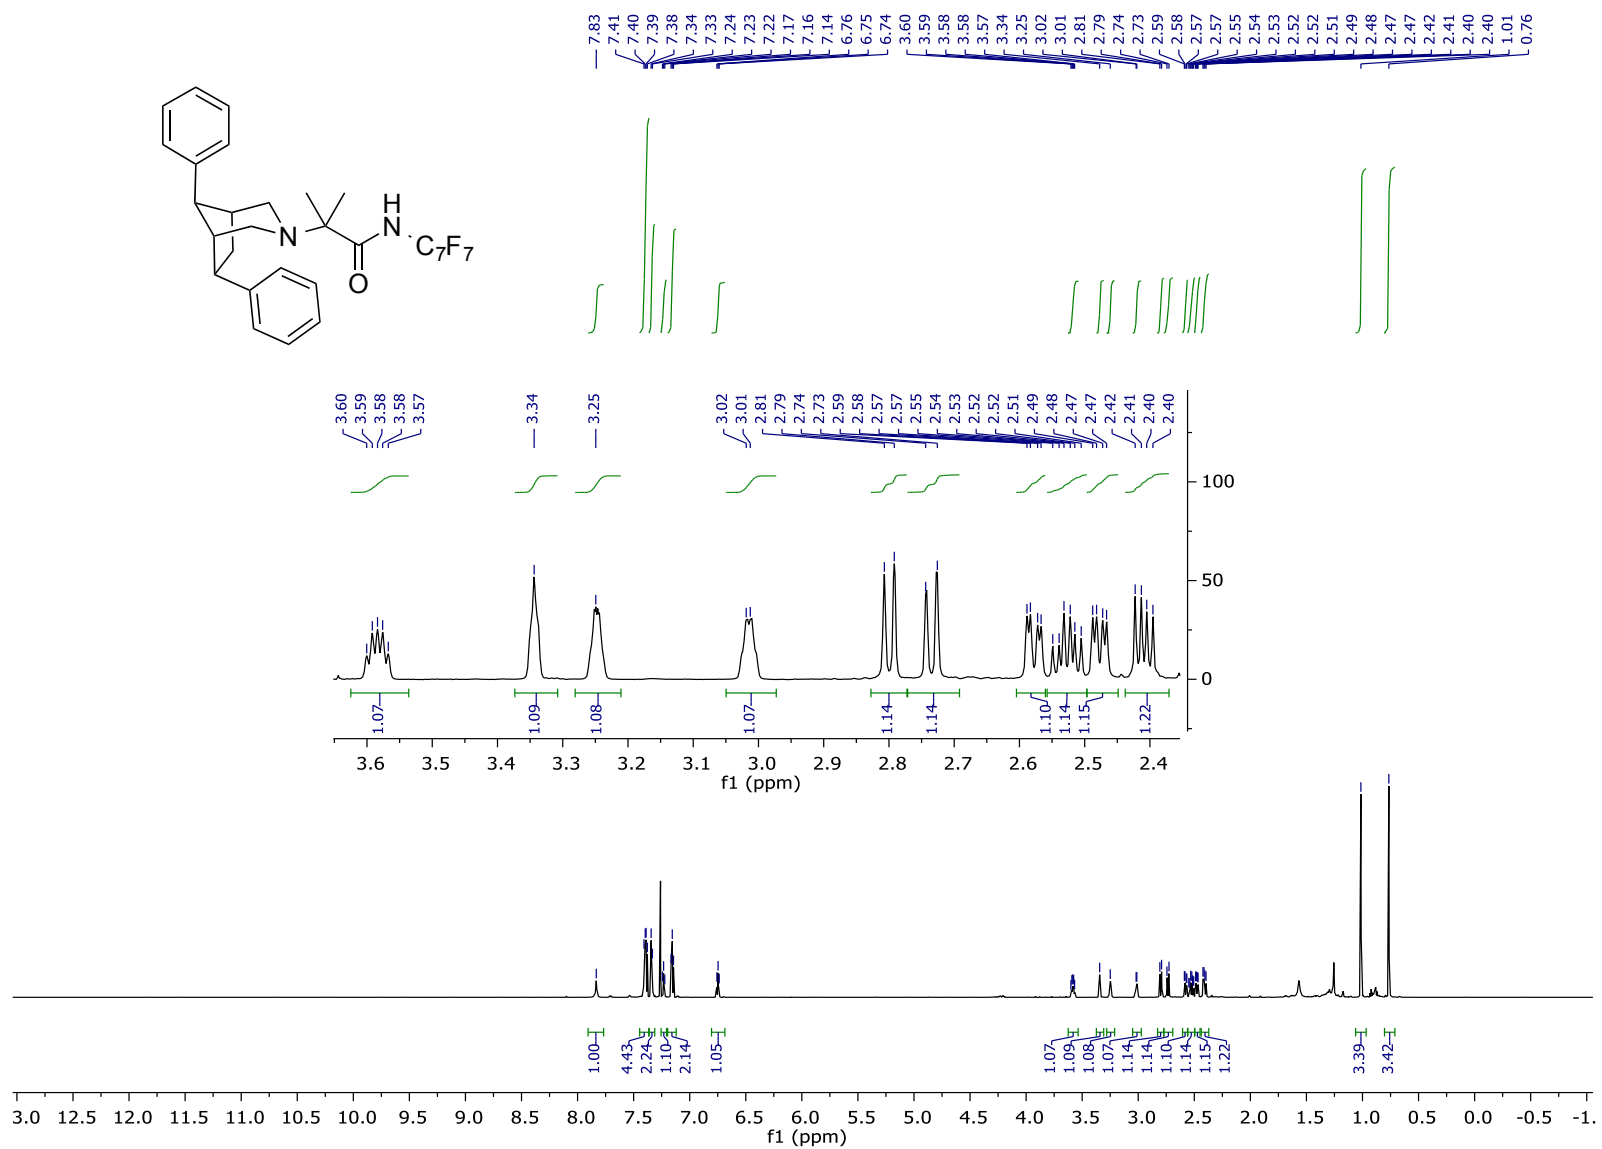

<sup>1</sup>H NMR Spectrum of **11g** in CDCl<sub>3</sub>

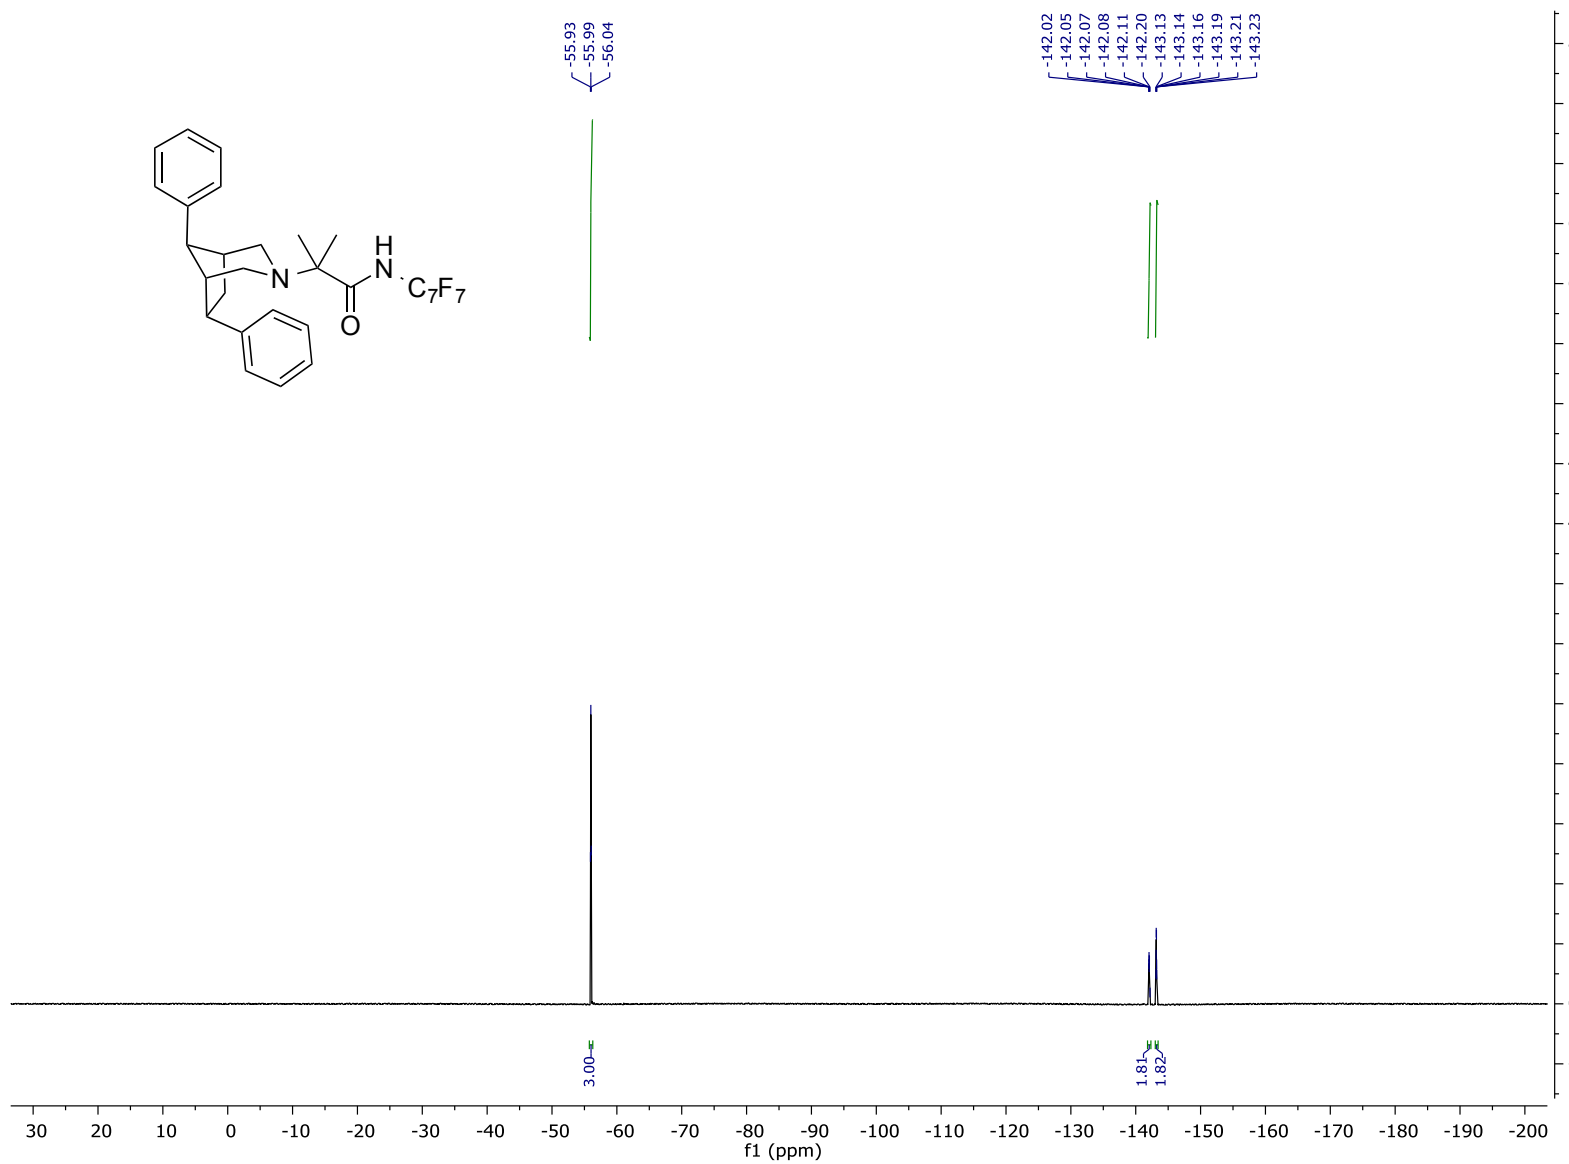

<sup>19</sup>F NMR Spectrum of **11g** in CDCl<sub>3</sub>

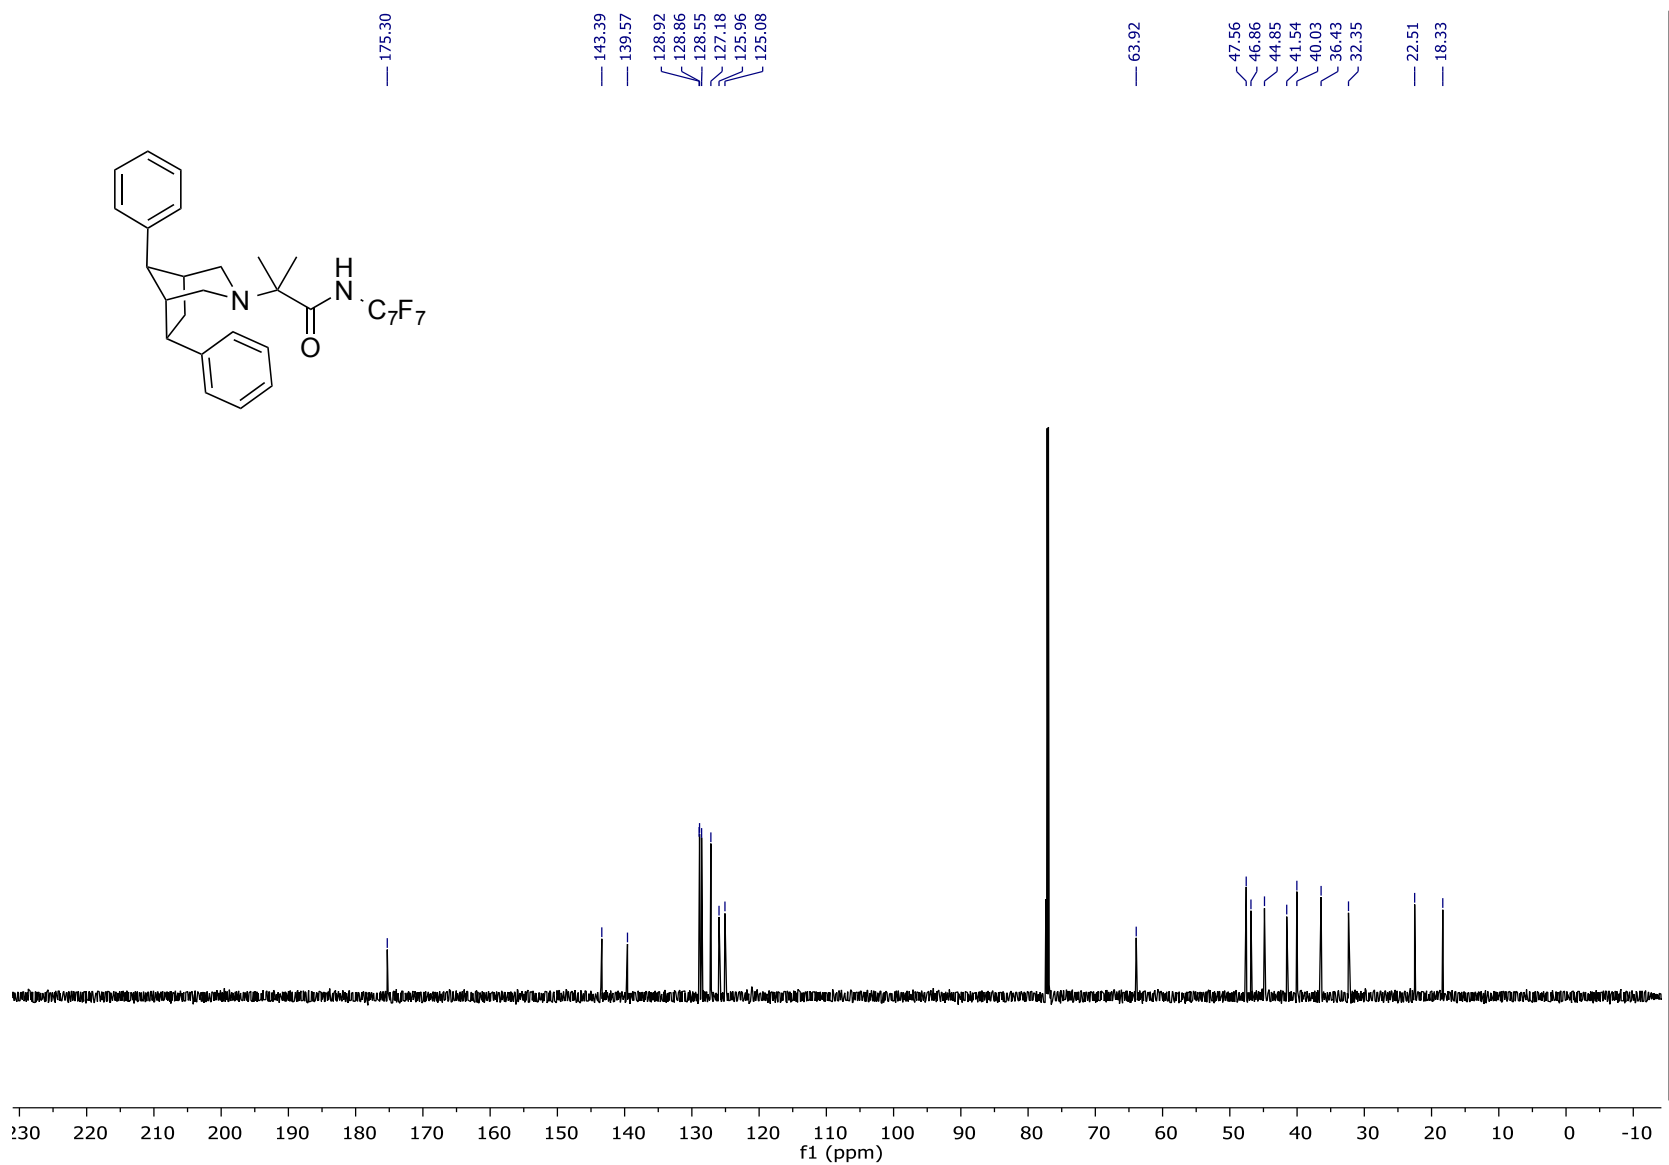

$^{13}\text{C}$  NMR Spectrum of **11g** in  $\text{CDCl}_3$

$^1\text{H}$ - $^{13}\text{C}$  HSQC Spectrum of **11g** in  $\text{CDCl}_3$

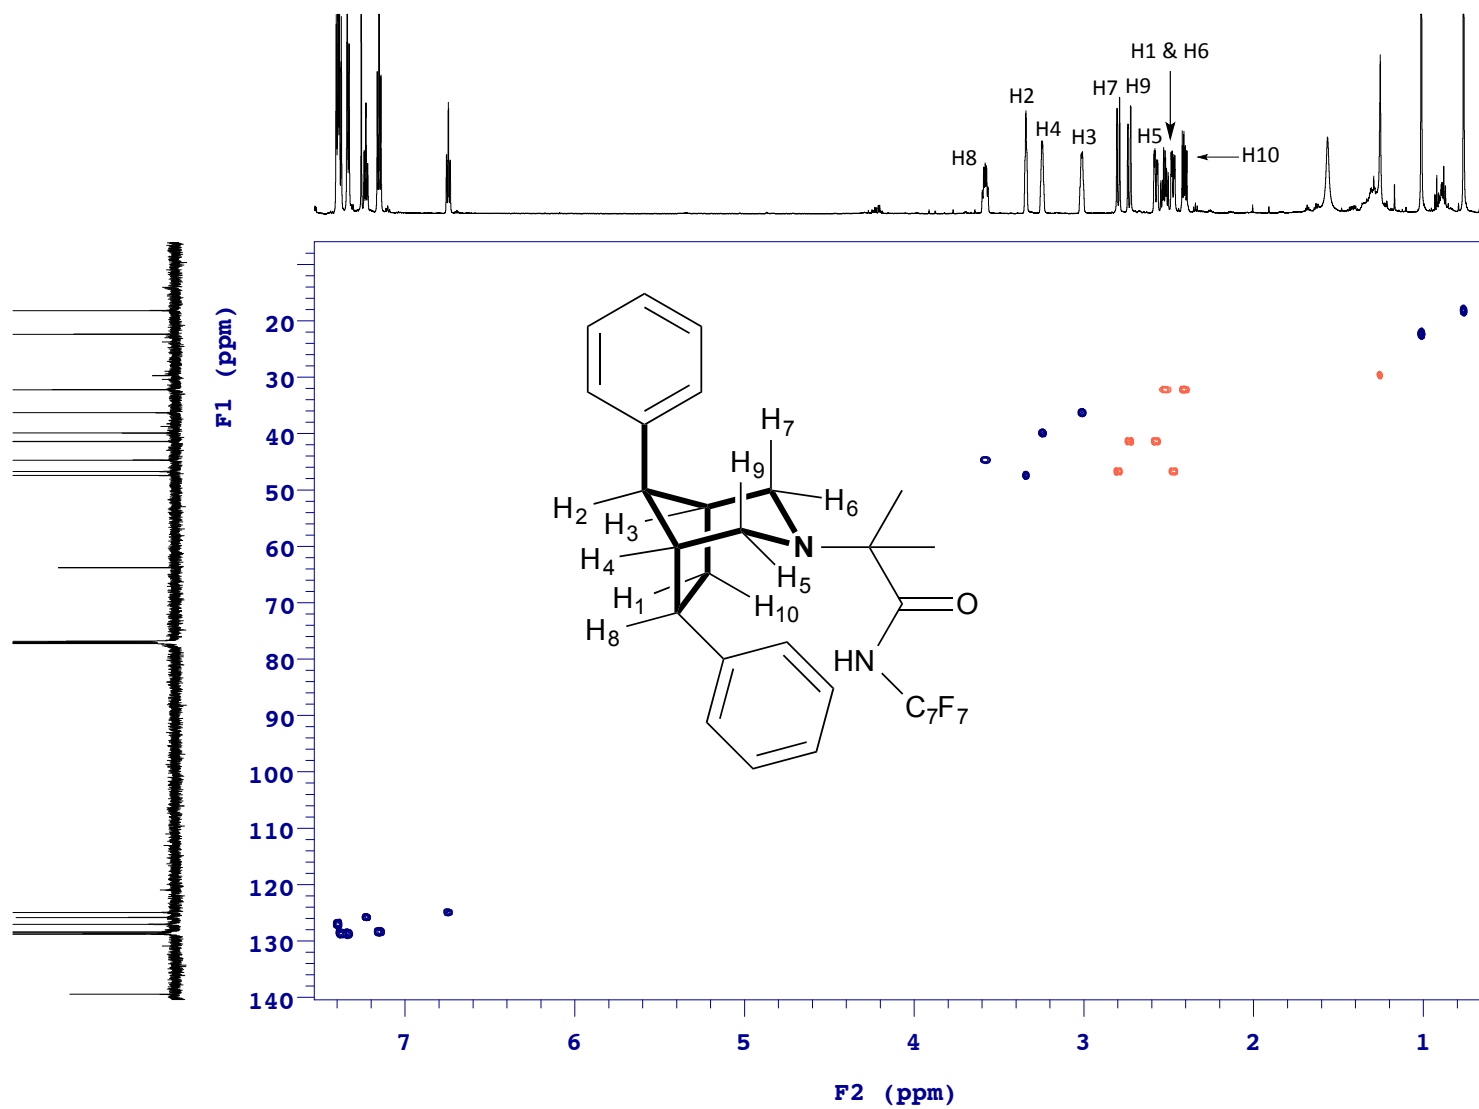

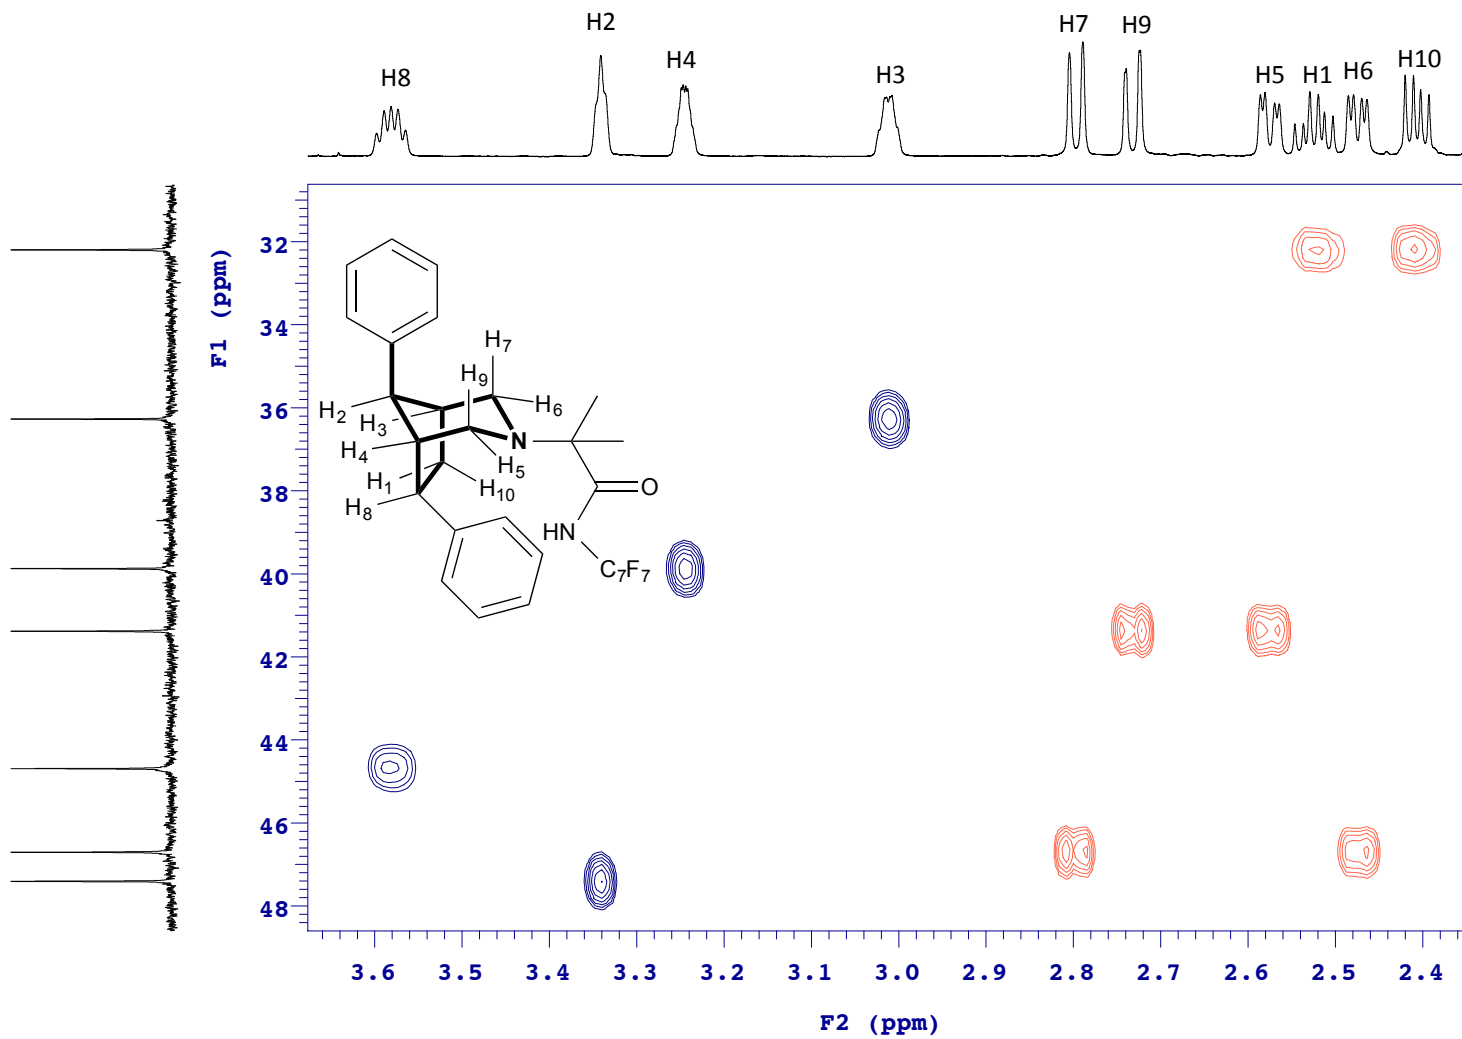

$^1\text{H}$ - $^{13}\text{C}$  HMBC Spectrum of **11g** in  $\text{CDCl}_3$  (Pale gray lines placed to visualize relevant cross-peaks)

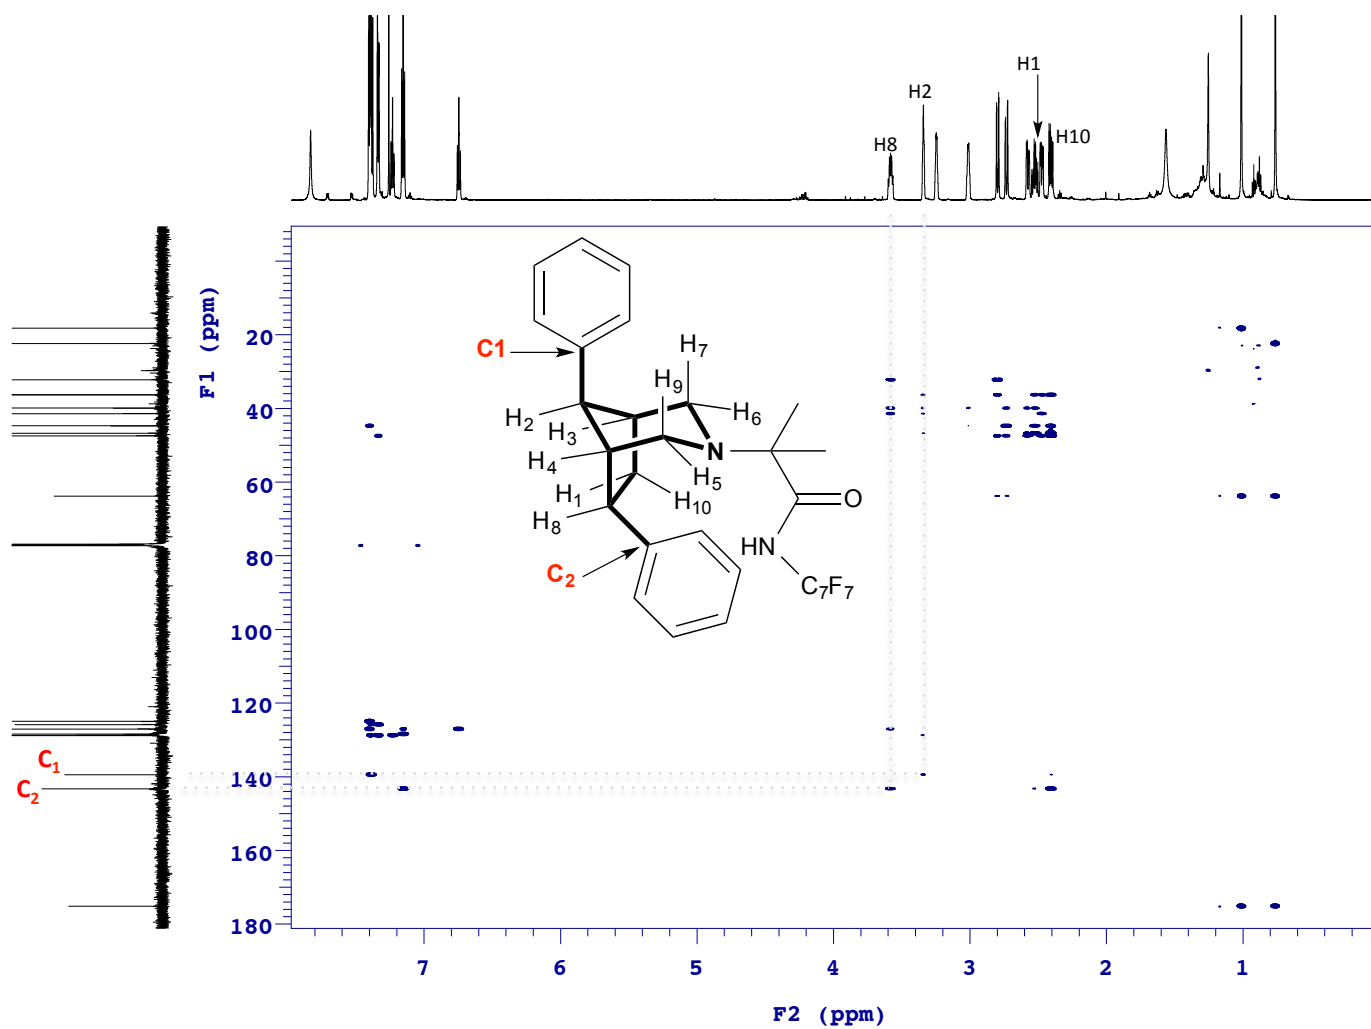

$^1\text{H}$ - $^1\text{H}$  COSY Spectrum of **11g** in  $\text{CDCl}_3$

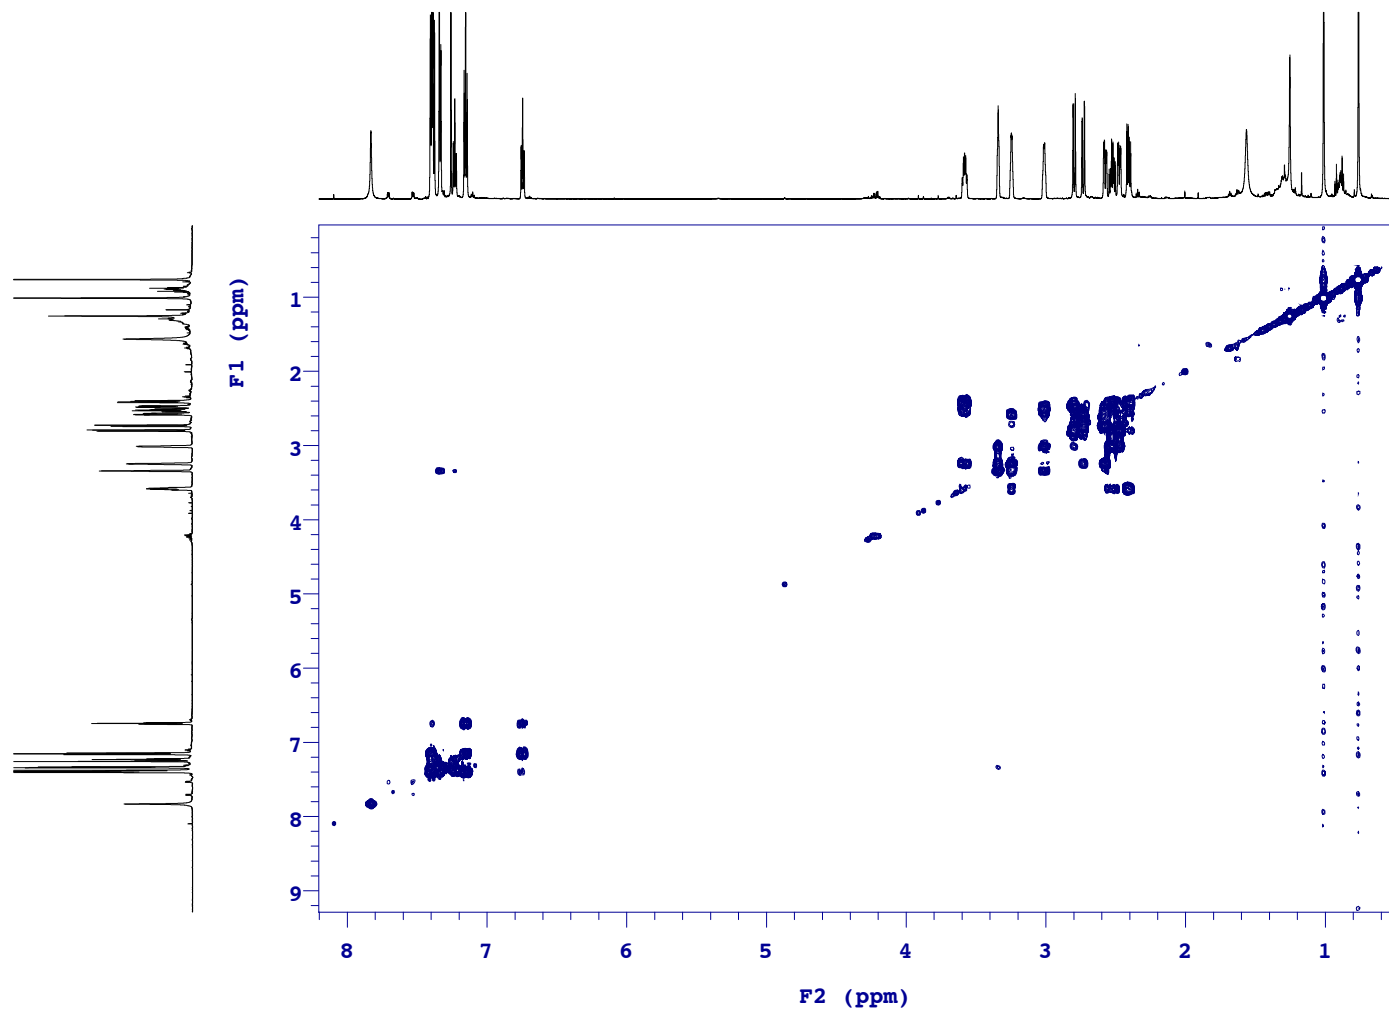

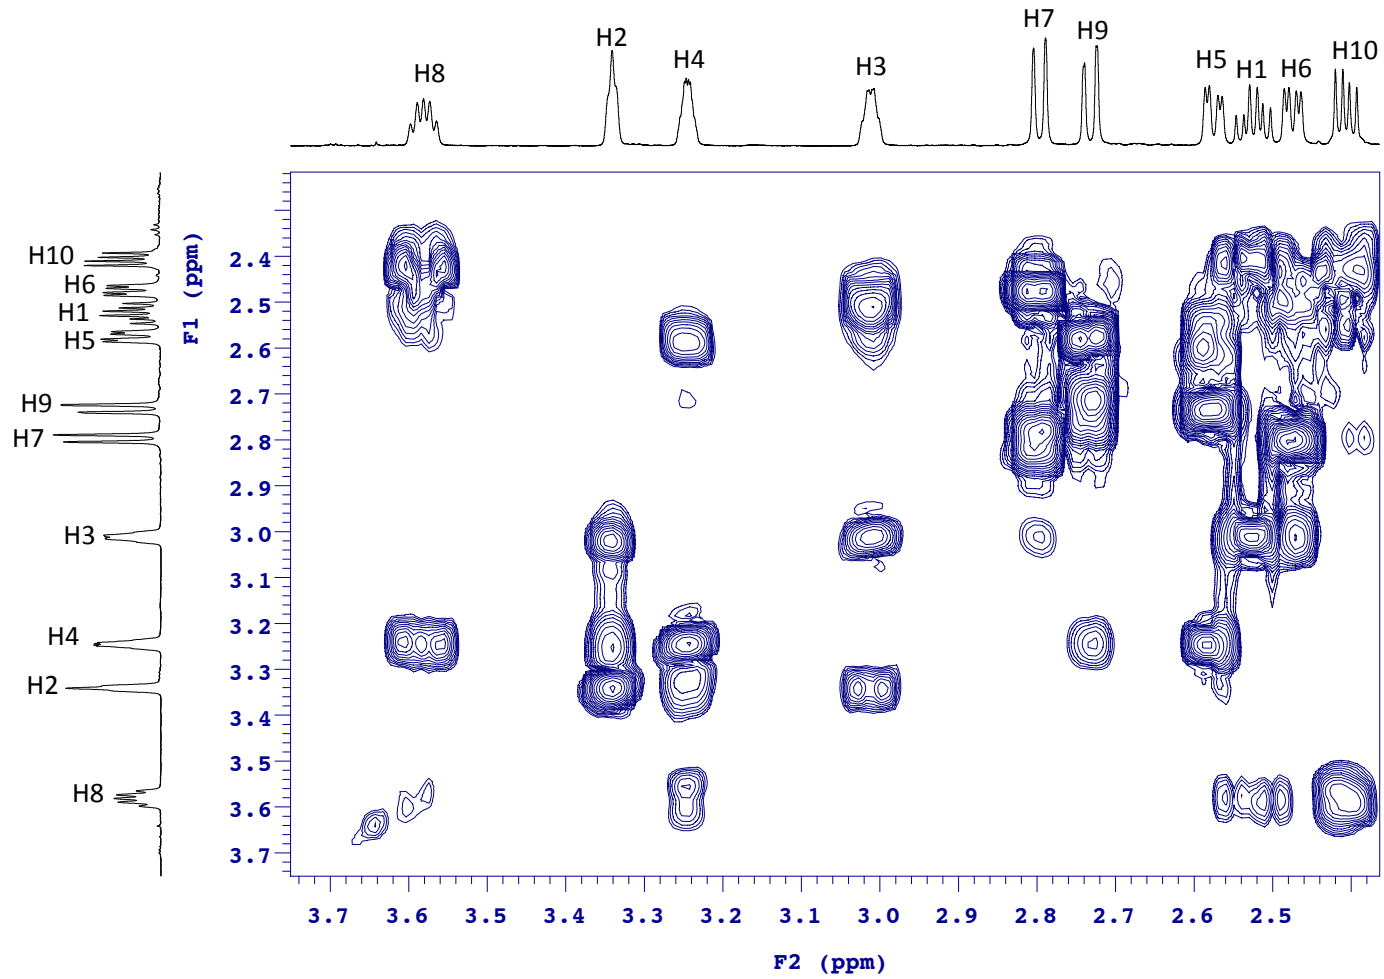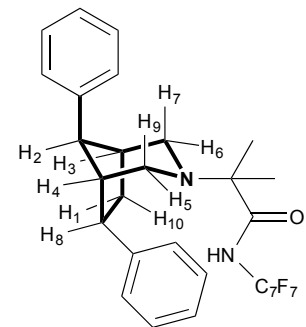



$^1\text{H}$ - $^1\text{H}$  NOESY Spectrum of **11g** in  $\text{CDCl}_3$

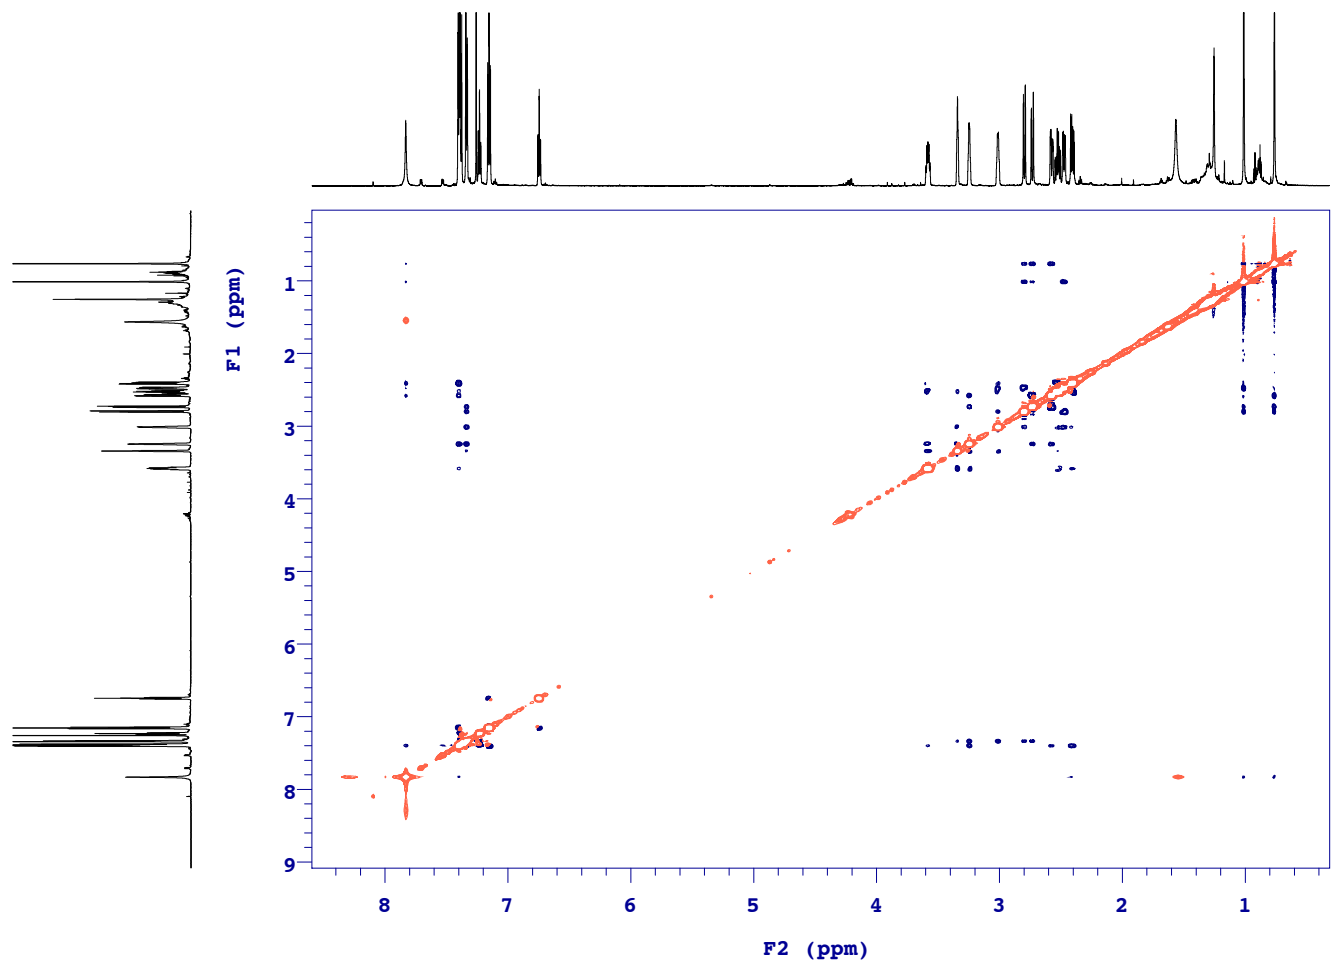

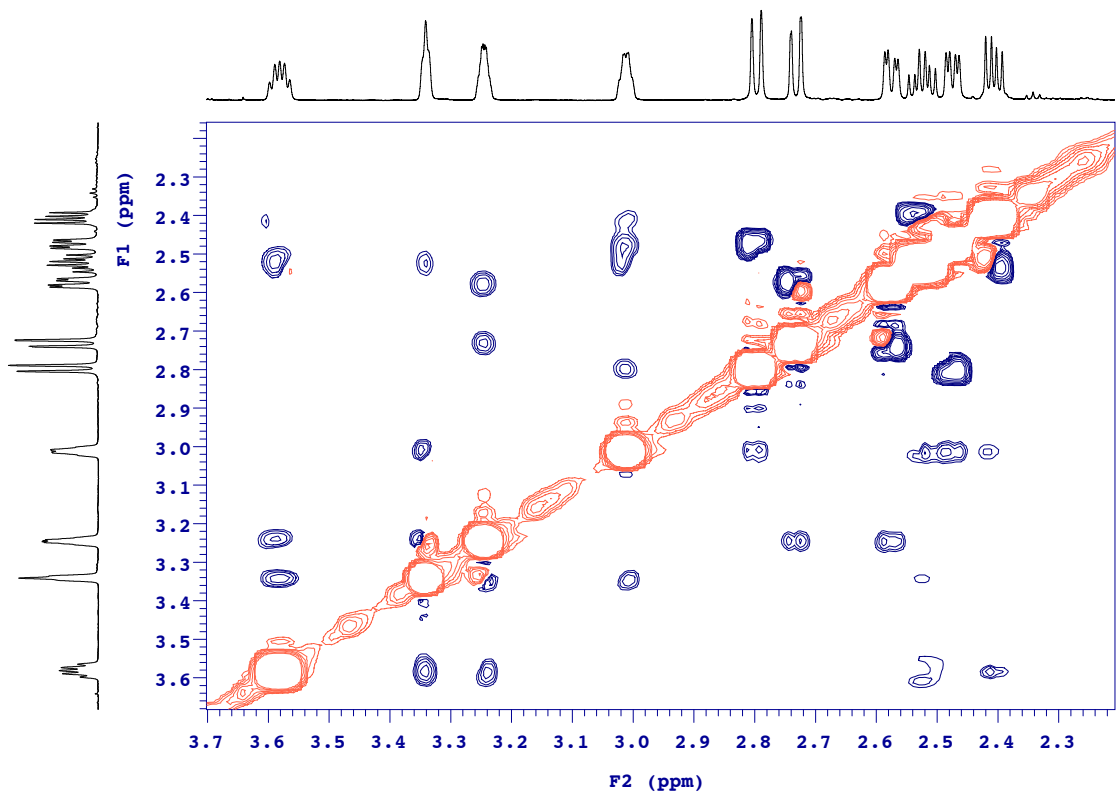

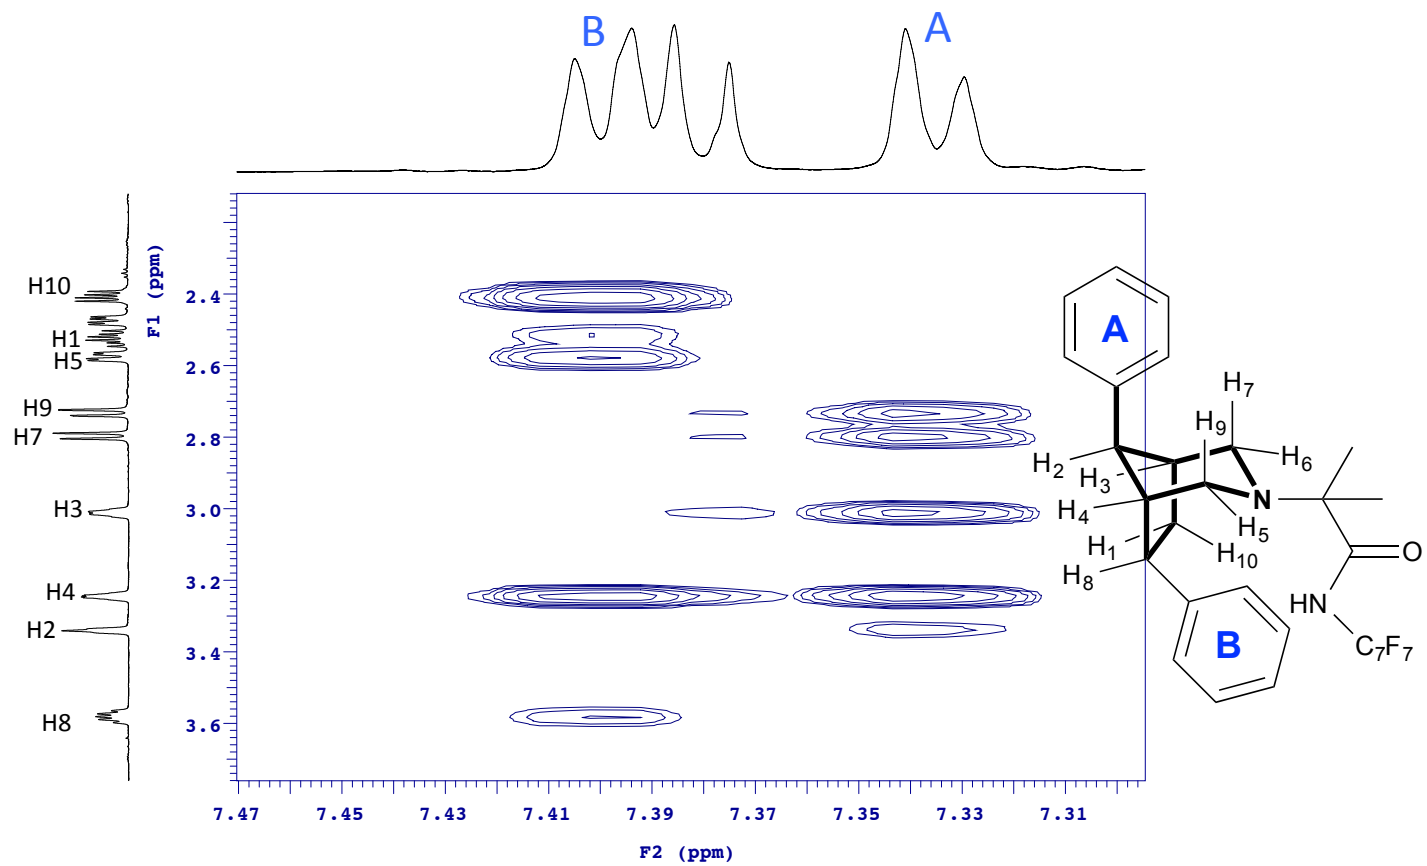

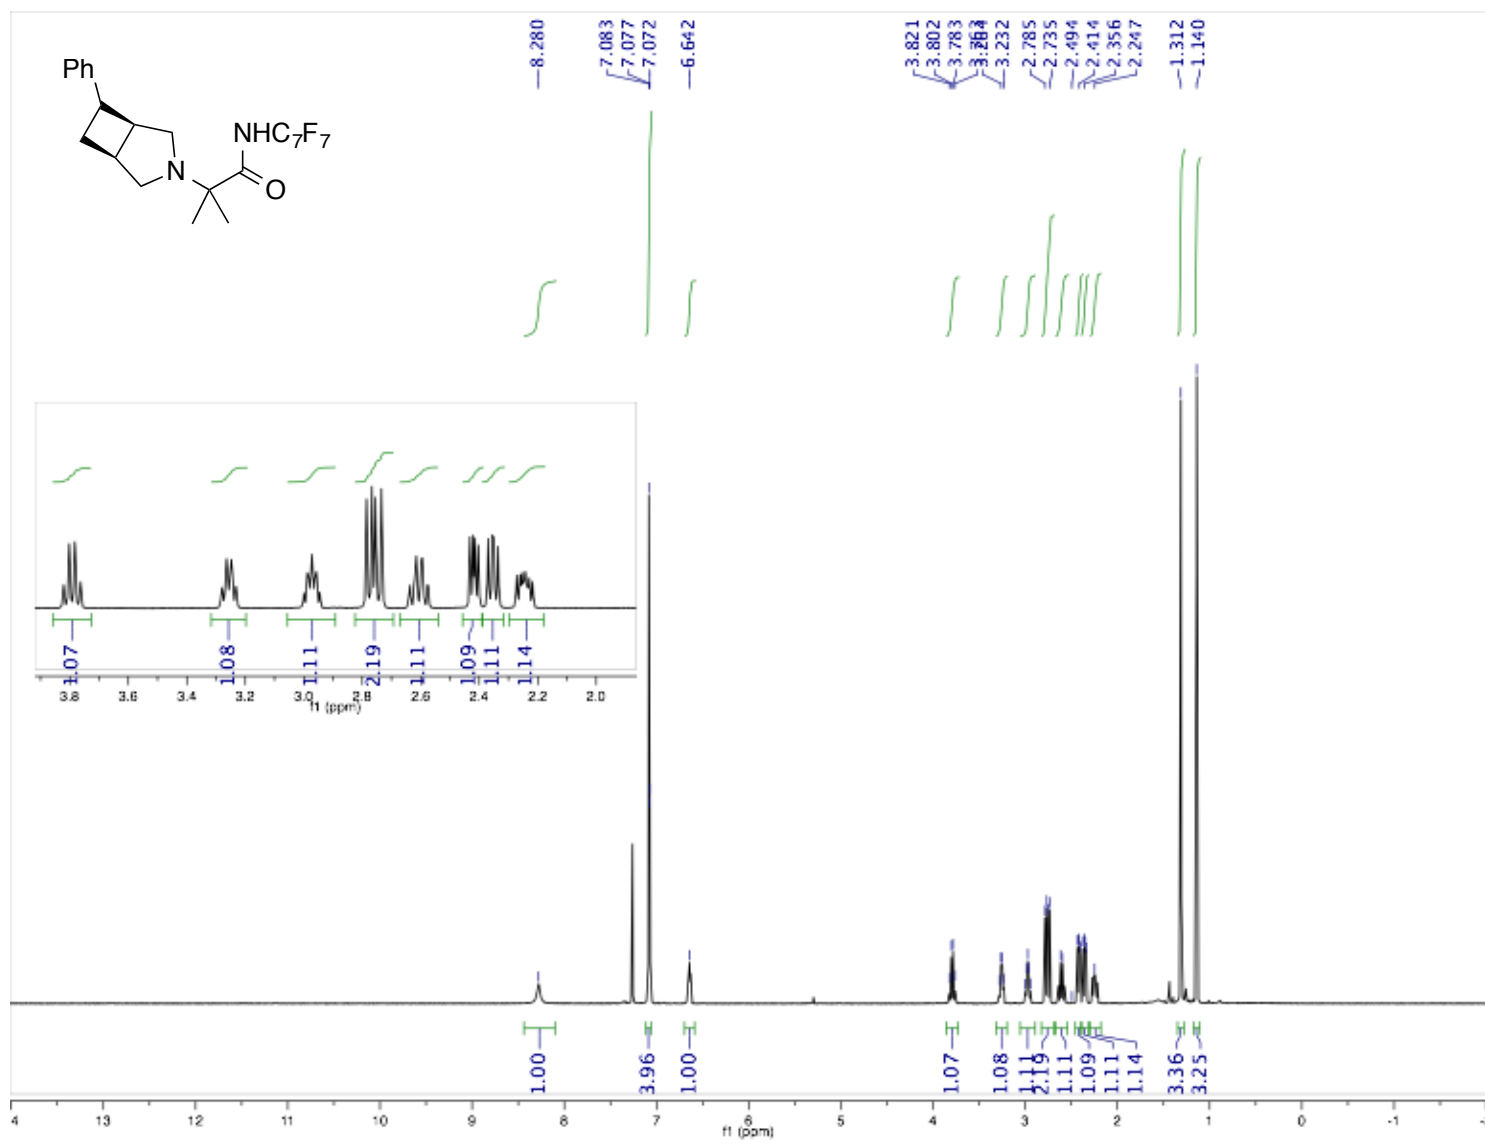

<sup>1</sup>H NMR Spectrum of **11h** in CDCl<sub>3</sub>

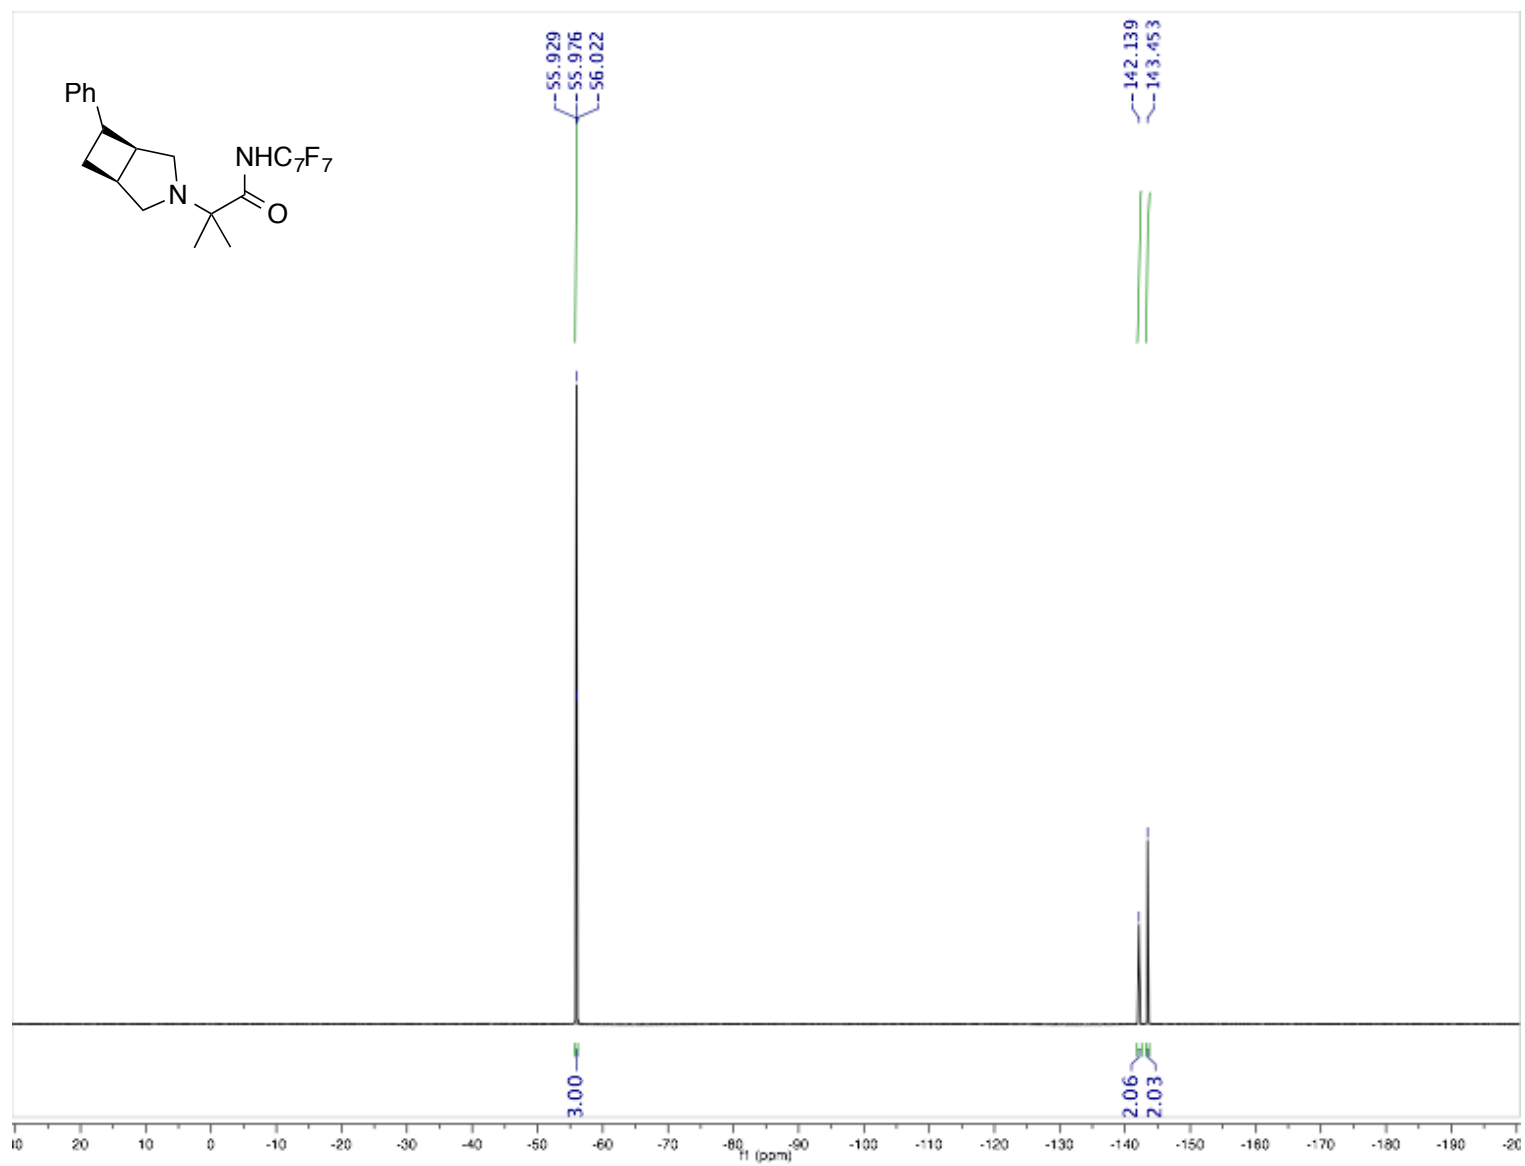

$^{19}\text{F}$  NMR Spectrum of **11h** in  $\text{CDCl}_3$

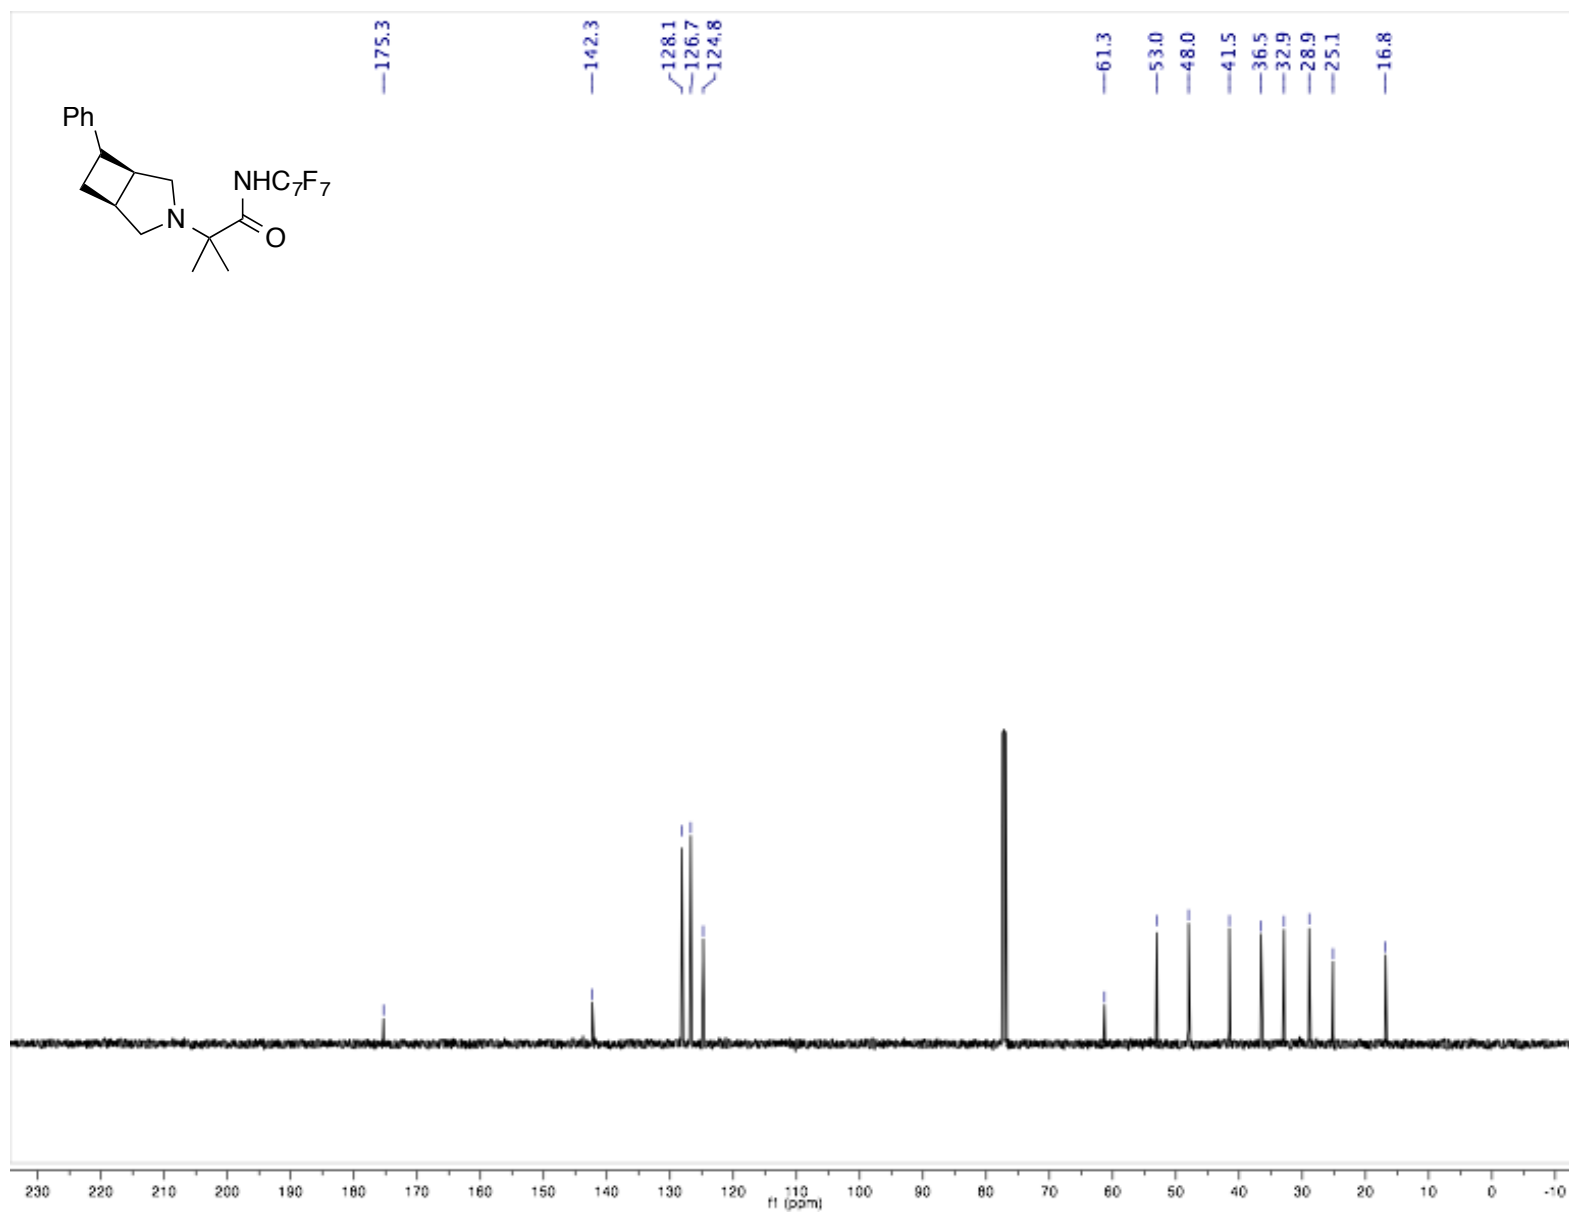

<sup>13</sup>C NMR Spectrum of **11h** in CDCl<sub>3</sub>

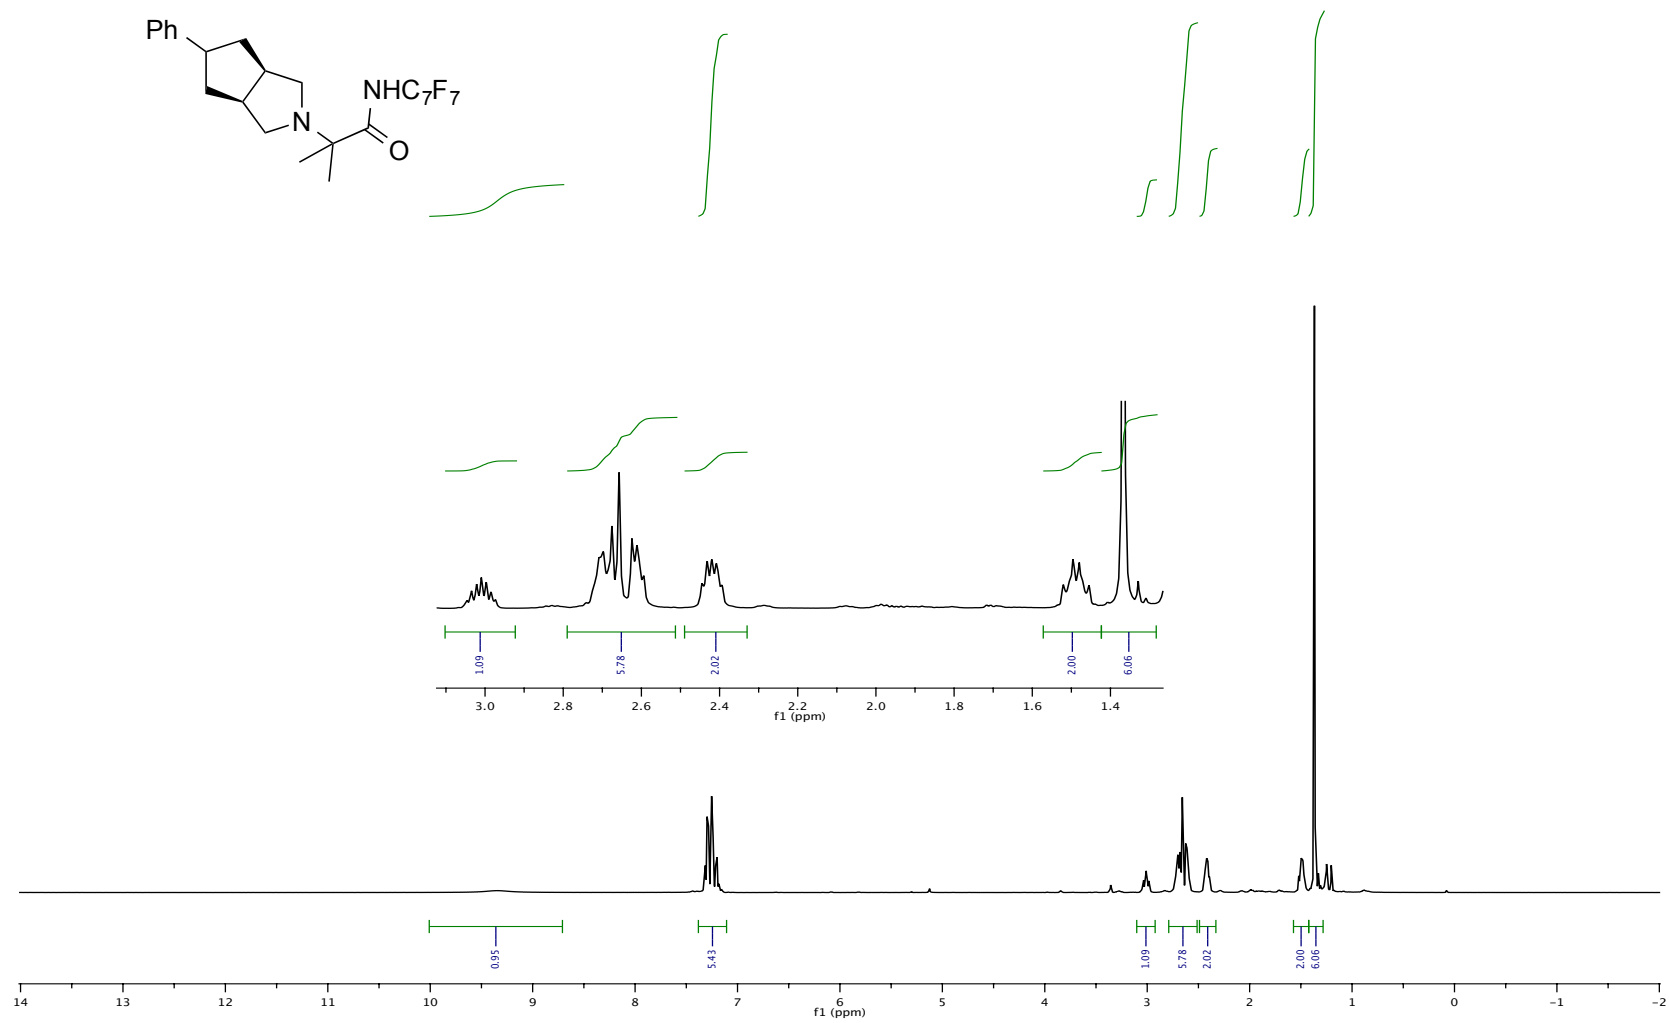

$^1\text{H}$  NMR Spectrum of **11i** in  $\text{CDCl}_3$

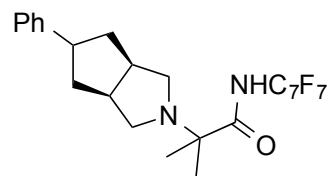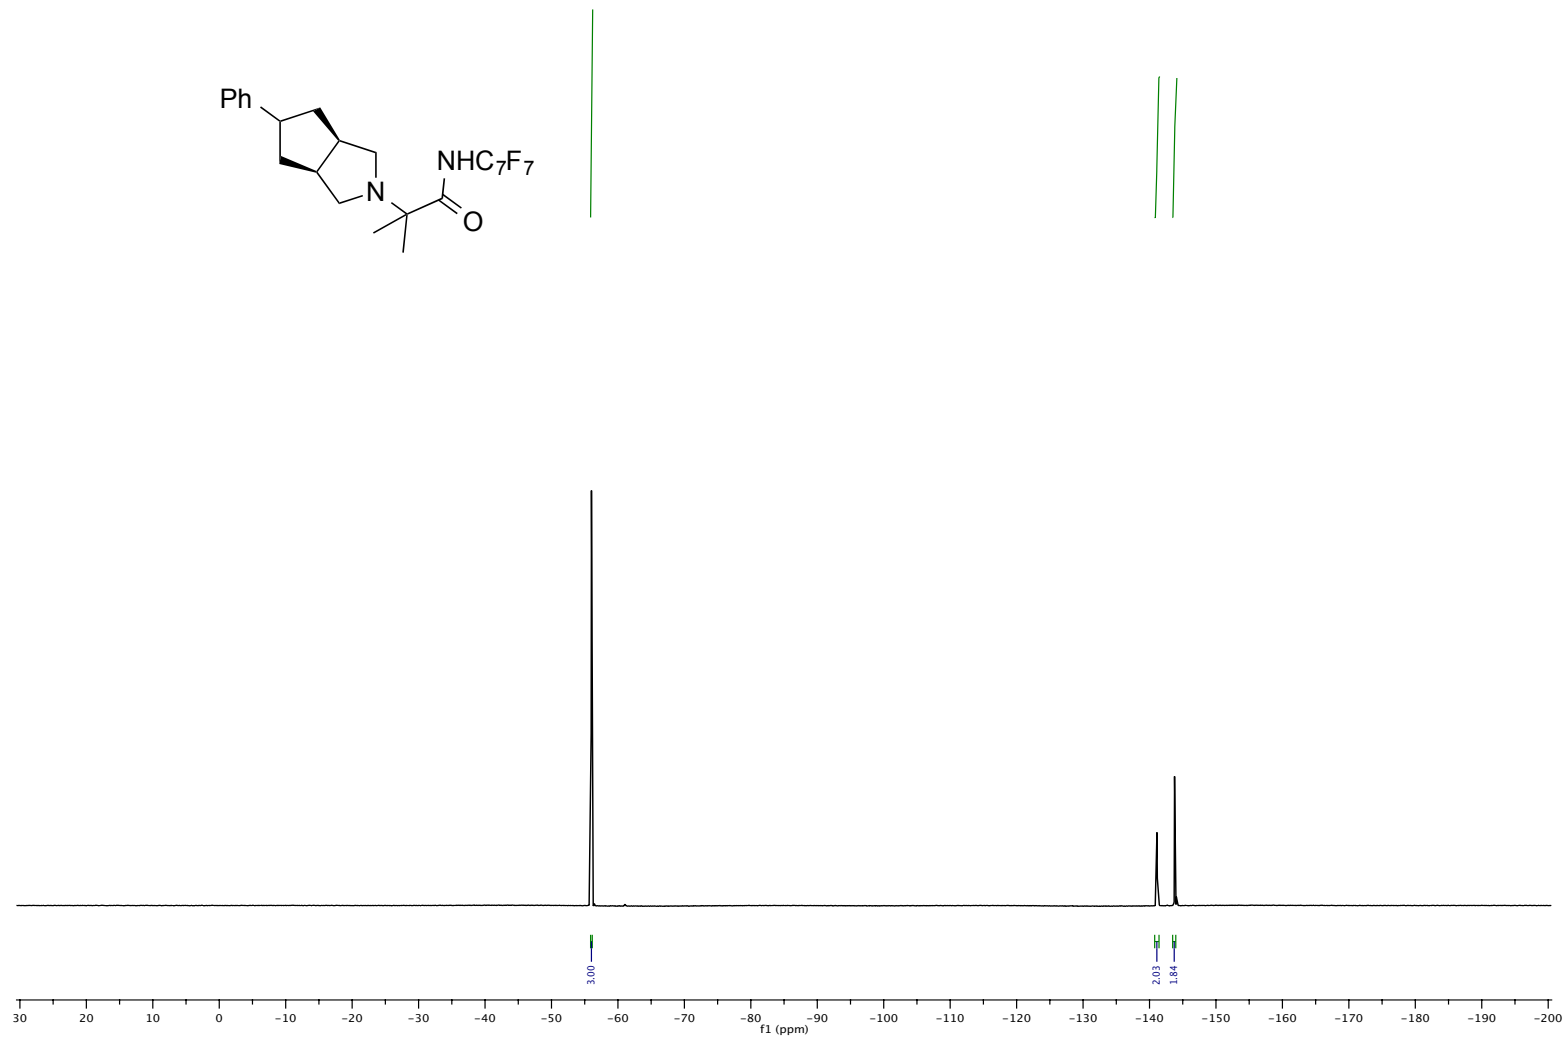

<sup>19</sup>F NMR Spectrum of **11i** in CDCl<sub>3</sub>



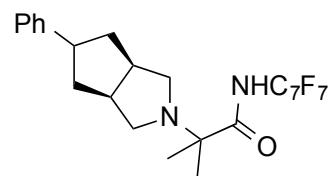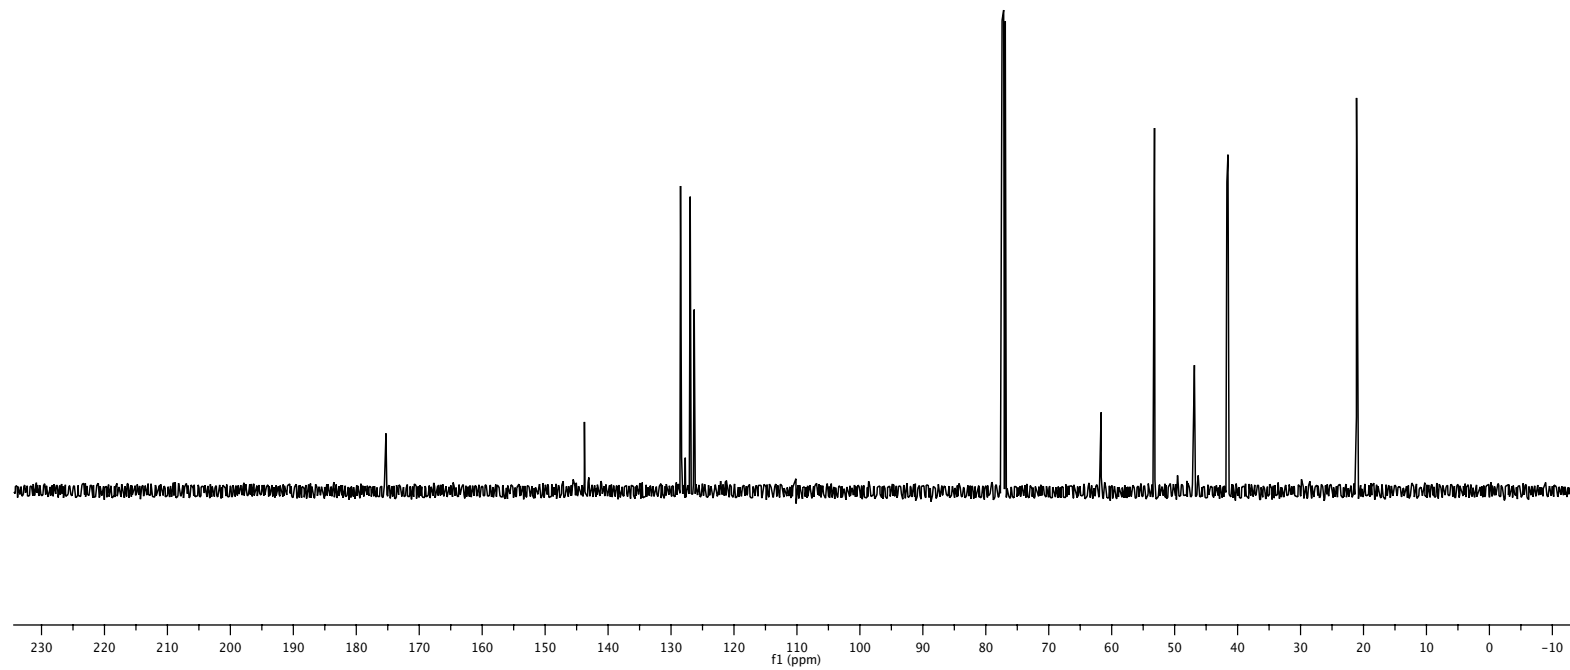

<sup>13</sup>C NMR Spectrum of **11i** in CDCl<sub>3</sub>

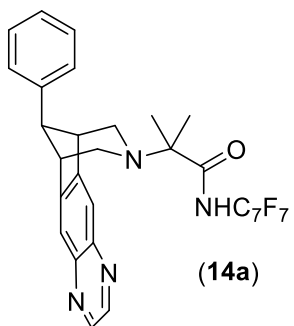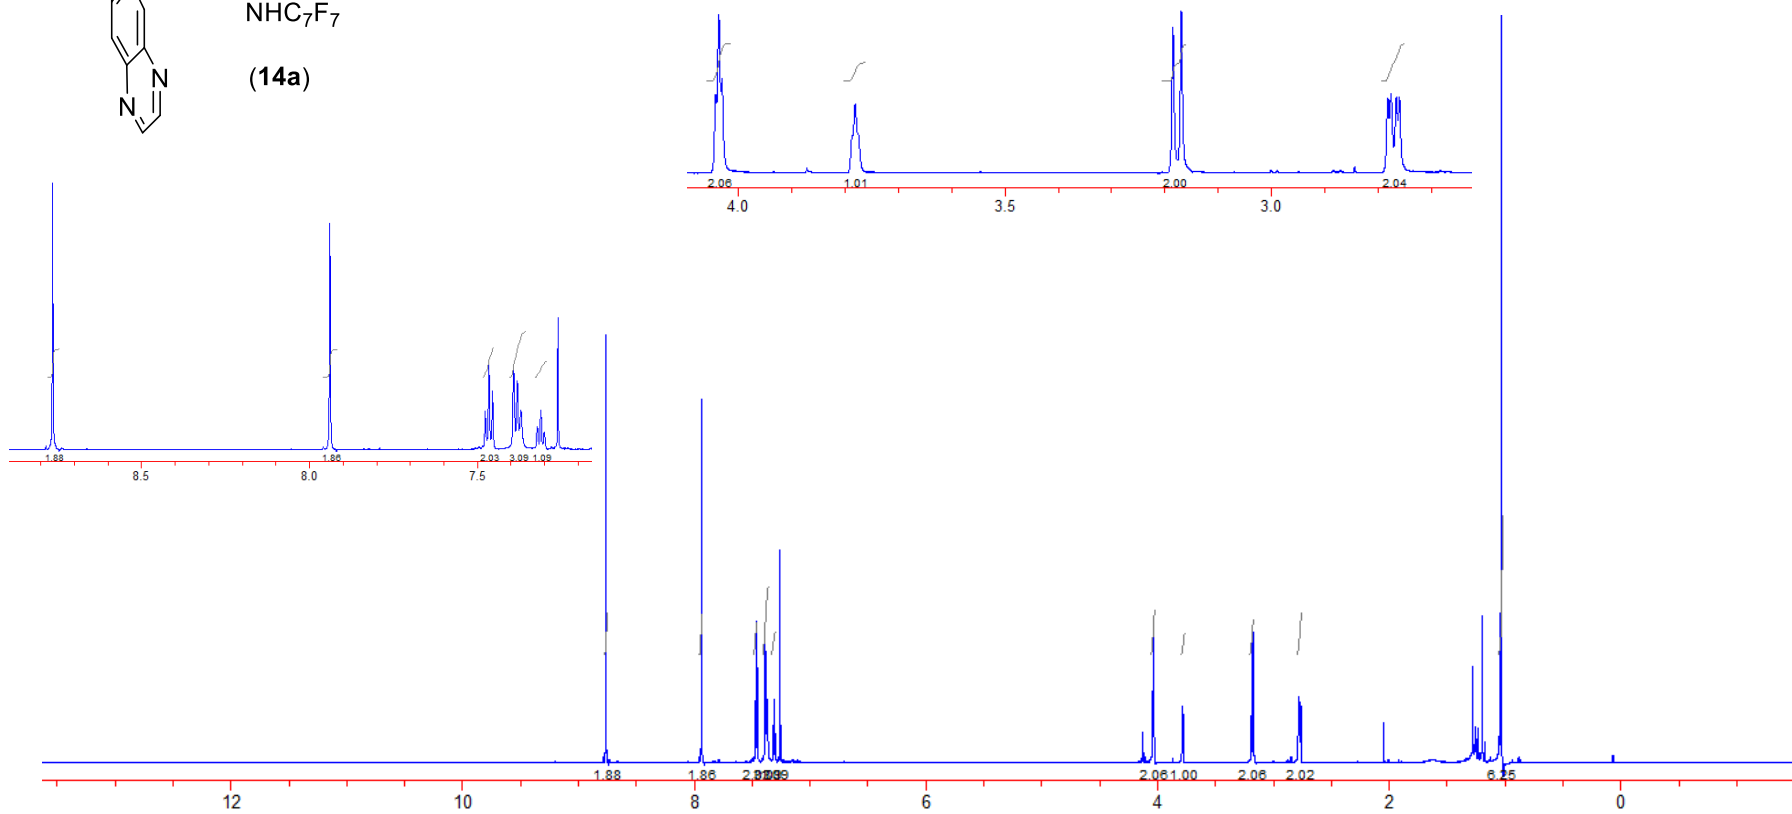

$^1\text{H}$  NMR Spectrum in  $\text{CDCl}_3$

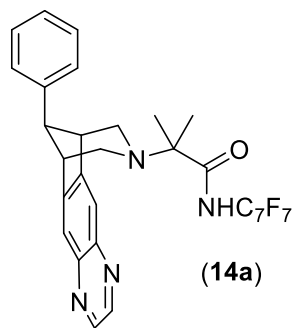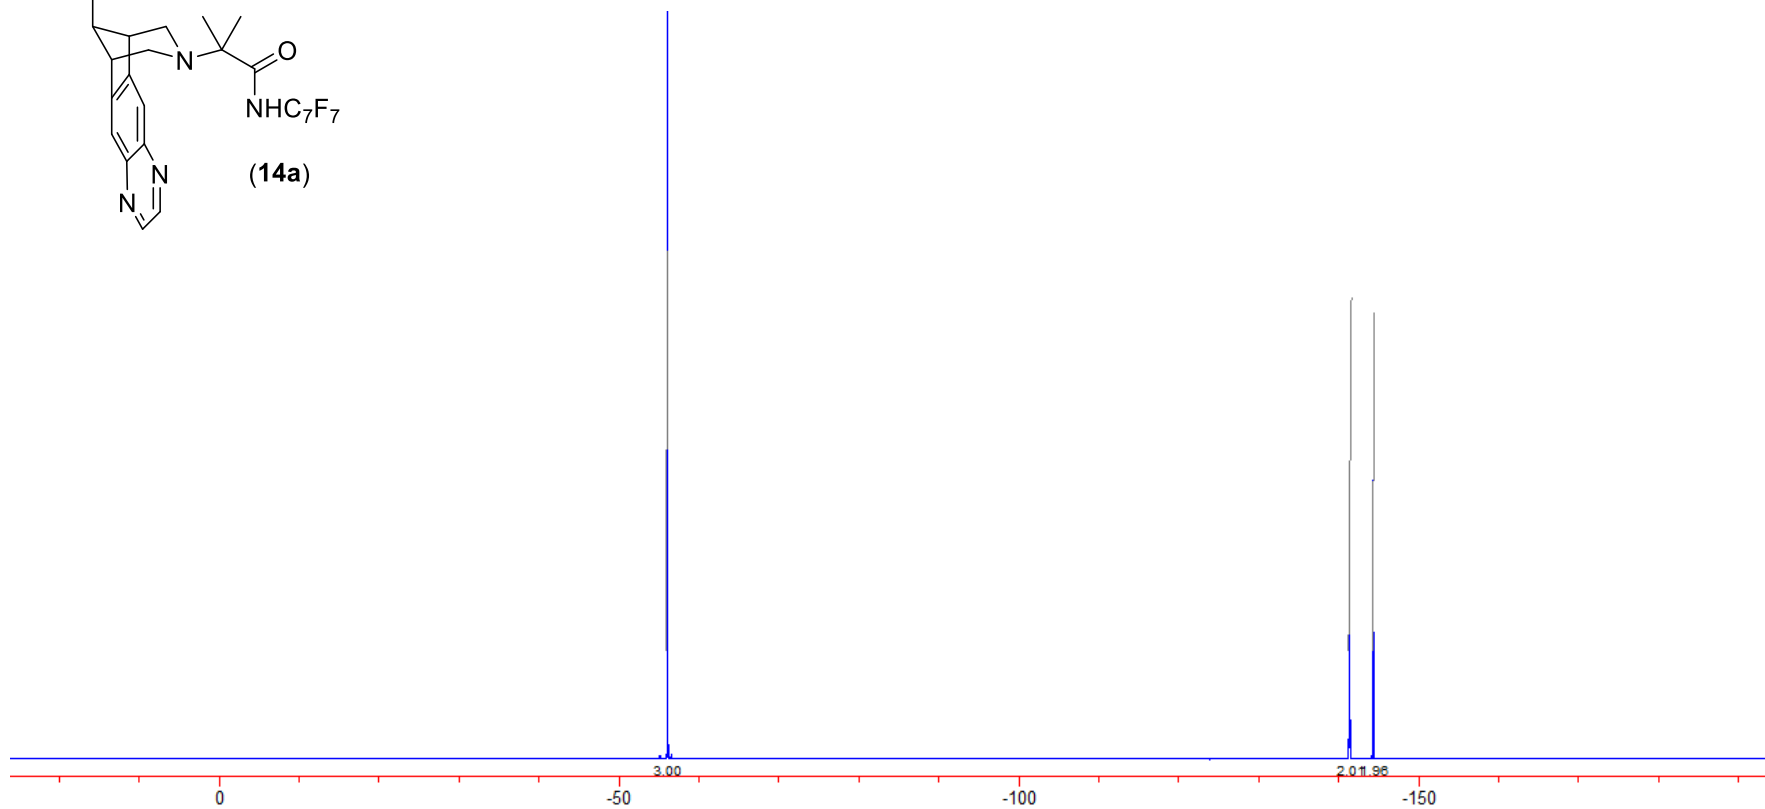

$^{19}\text{F}$  NMR Spectrum in  $\text{CDCl}_3$

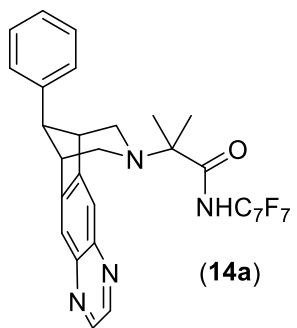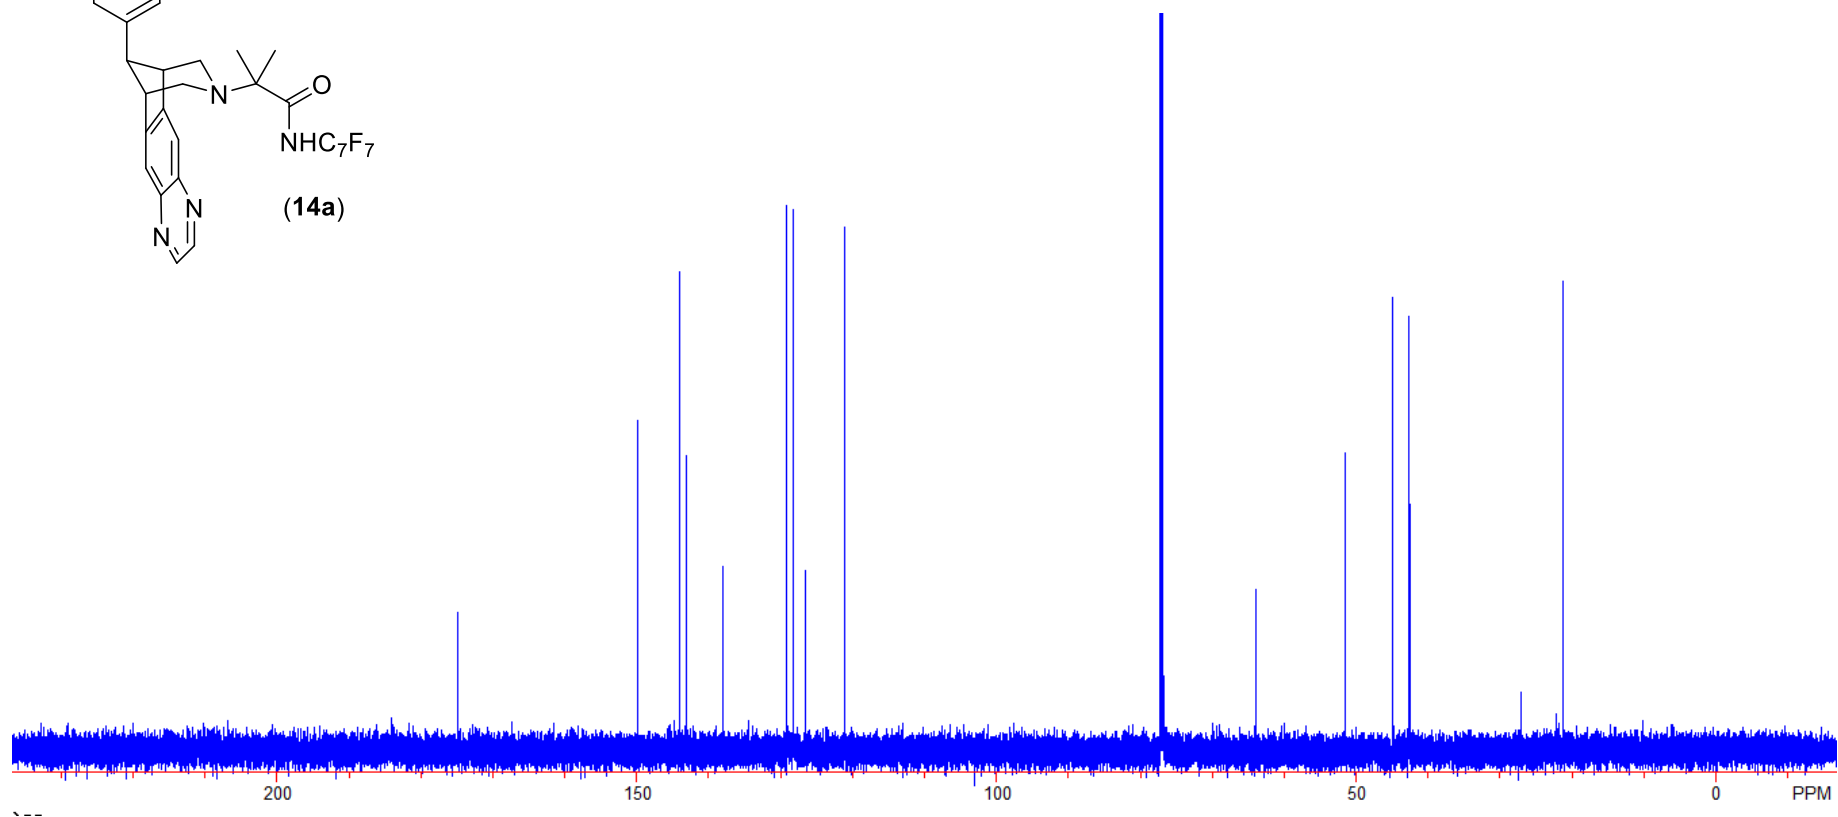

<sup>13</sup>C NMR Spectrum in CDCl<sub>3</sub>

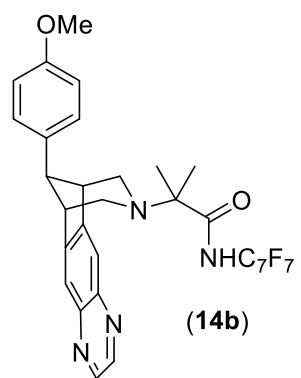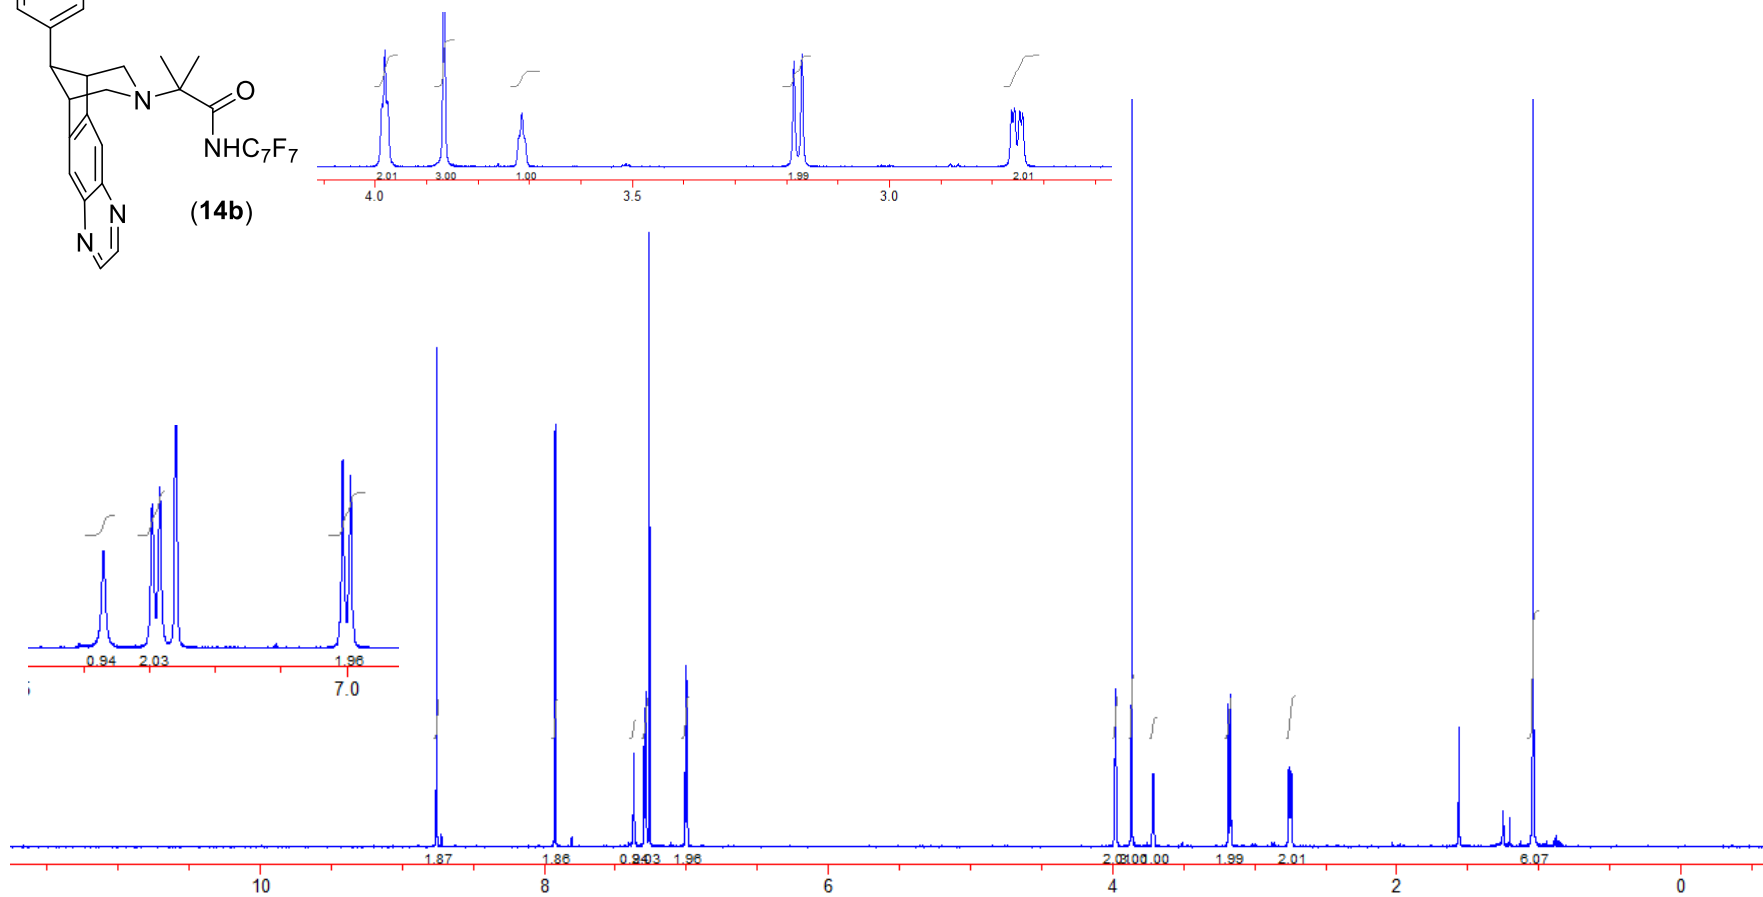

$^1\text{H}$  NMR Spectrum in  $\text{CDCl}_3$

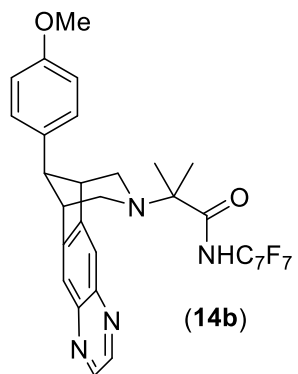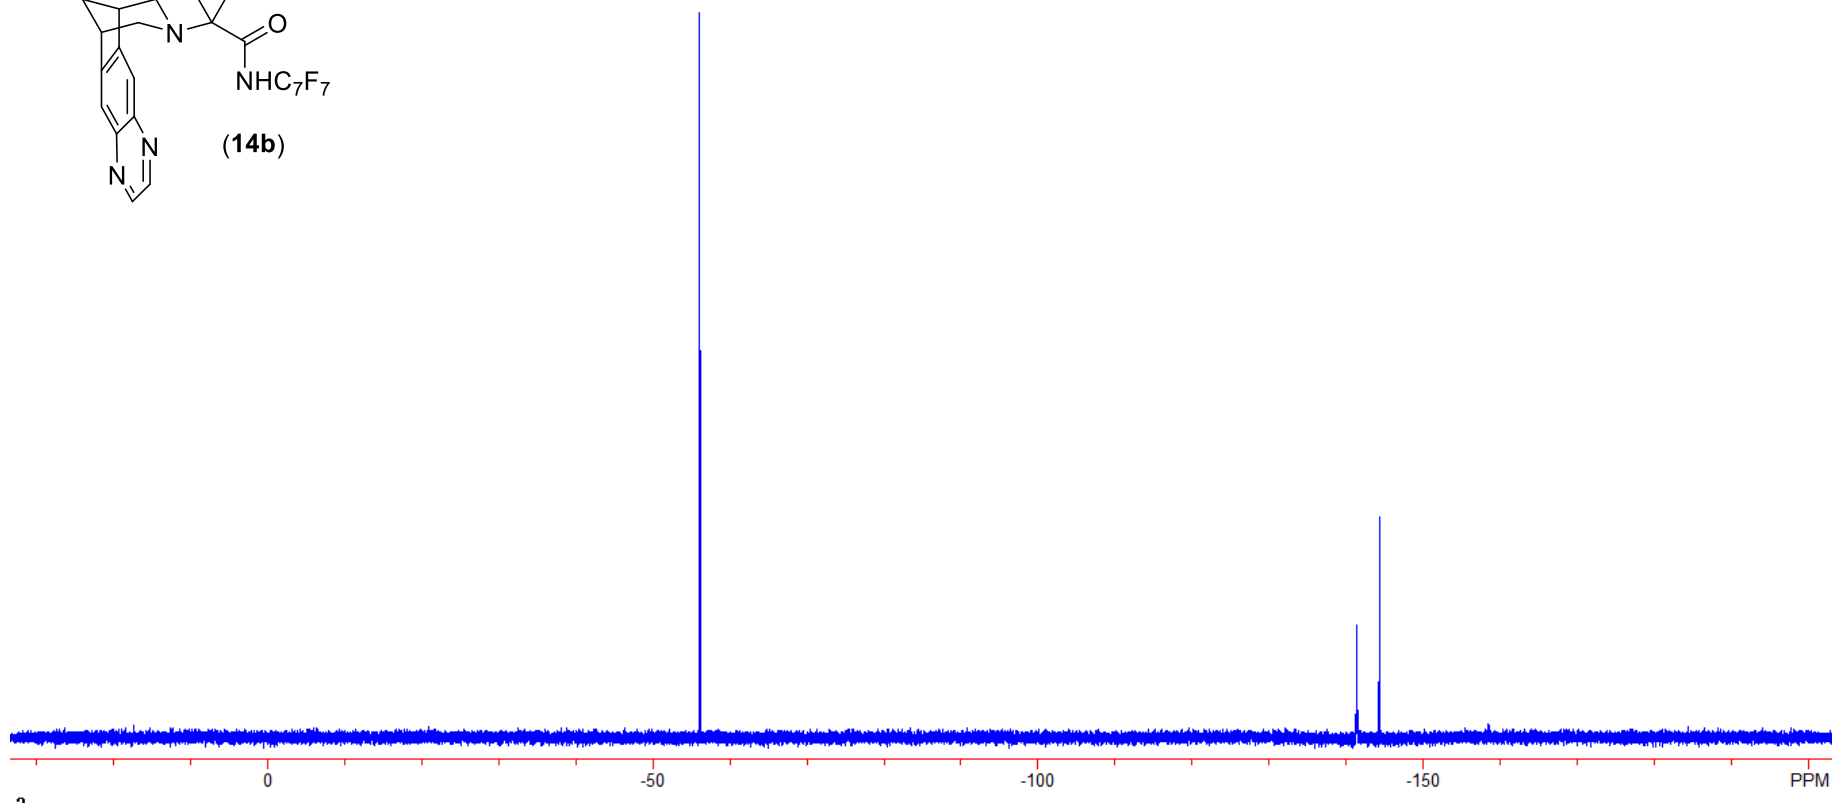

$^{19}\text{F}$  NMR Spectrum in  $\text{CDCl}_3$

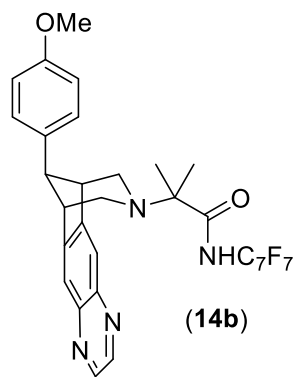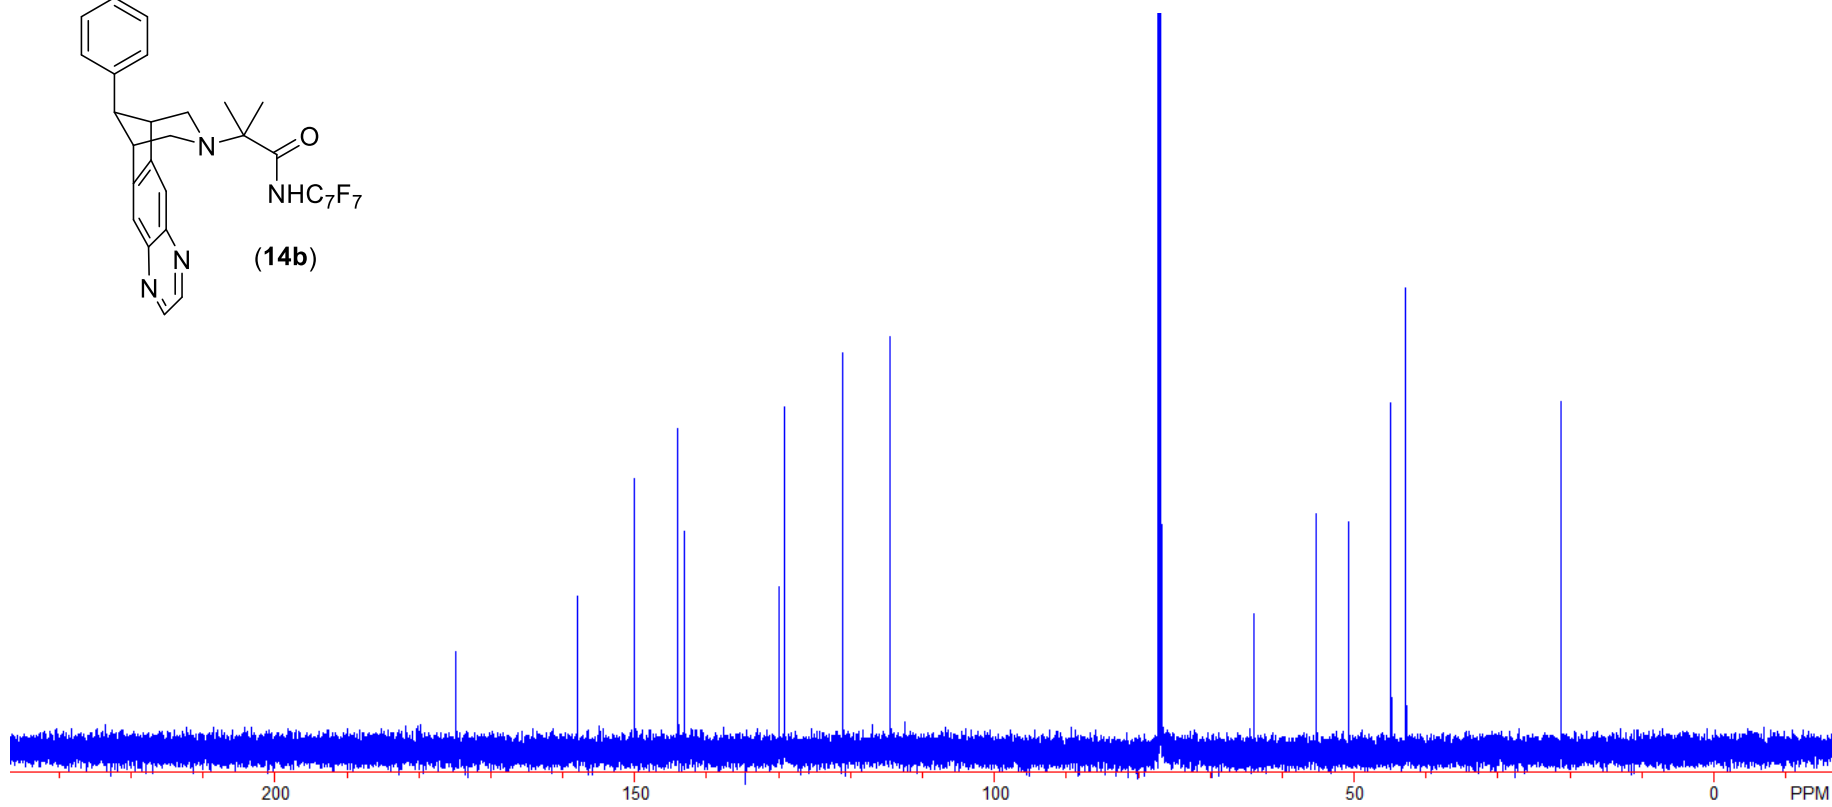

$^{13}\text{C}$  NMR Spectrum in  $\text{CDCl}_3$

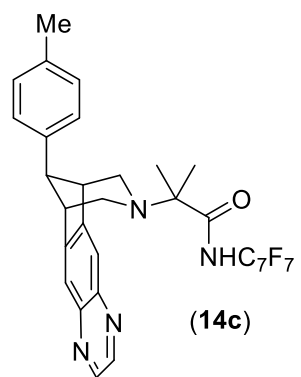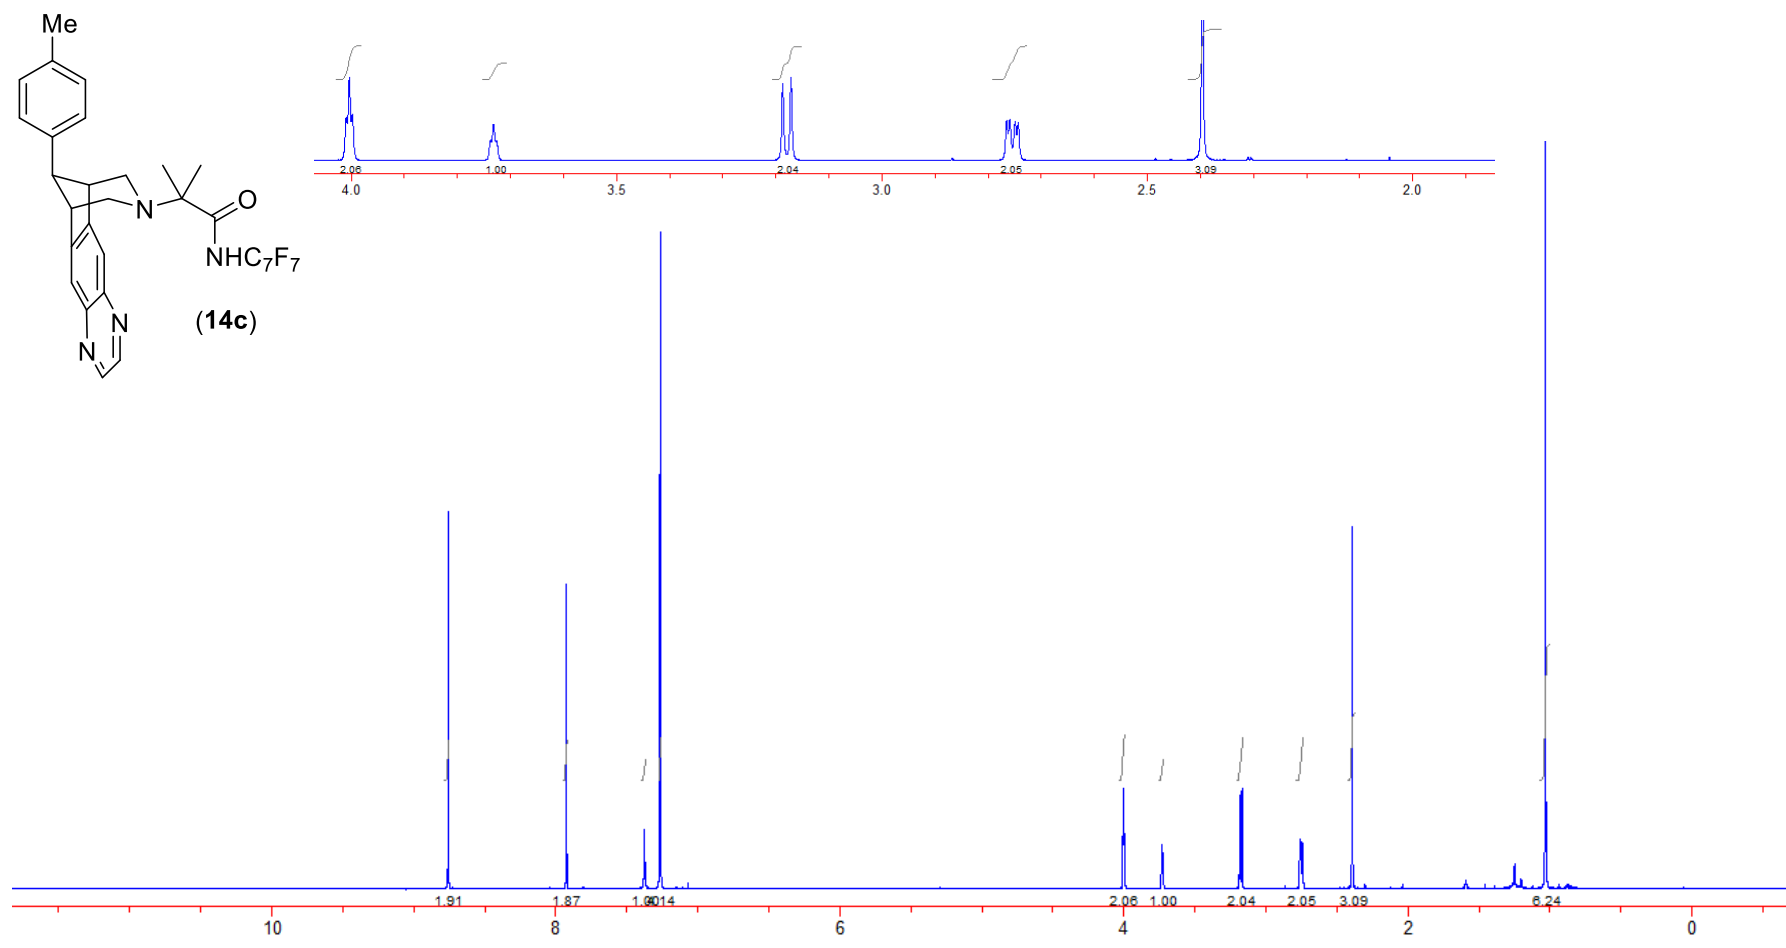

<sup>1</sup>H NMR Spectrum in CDCl<sub>3</sub>



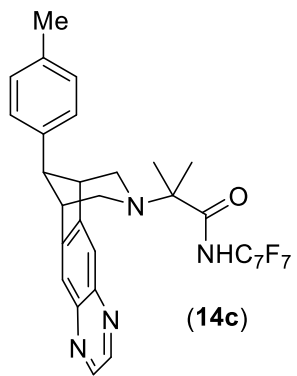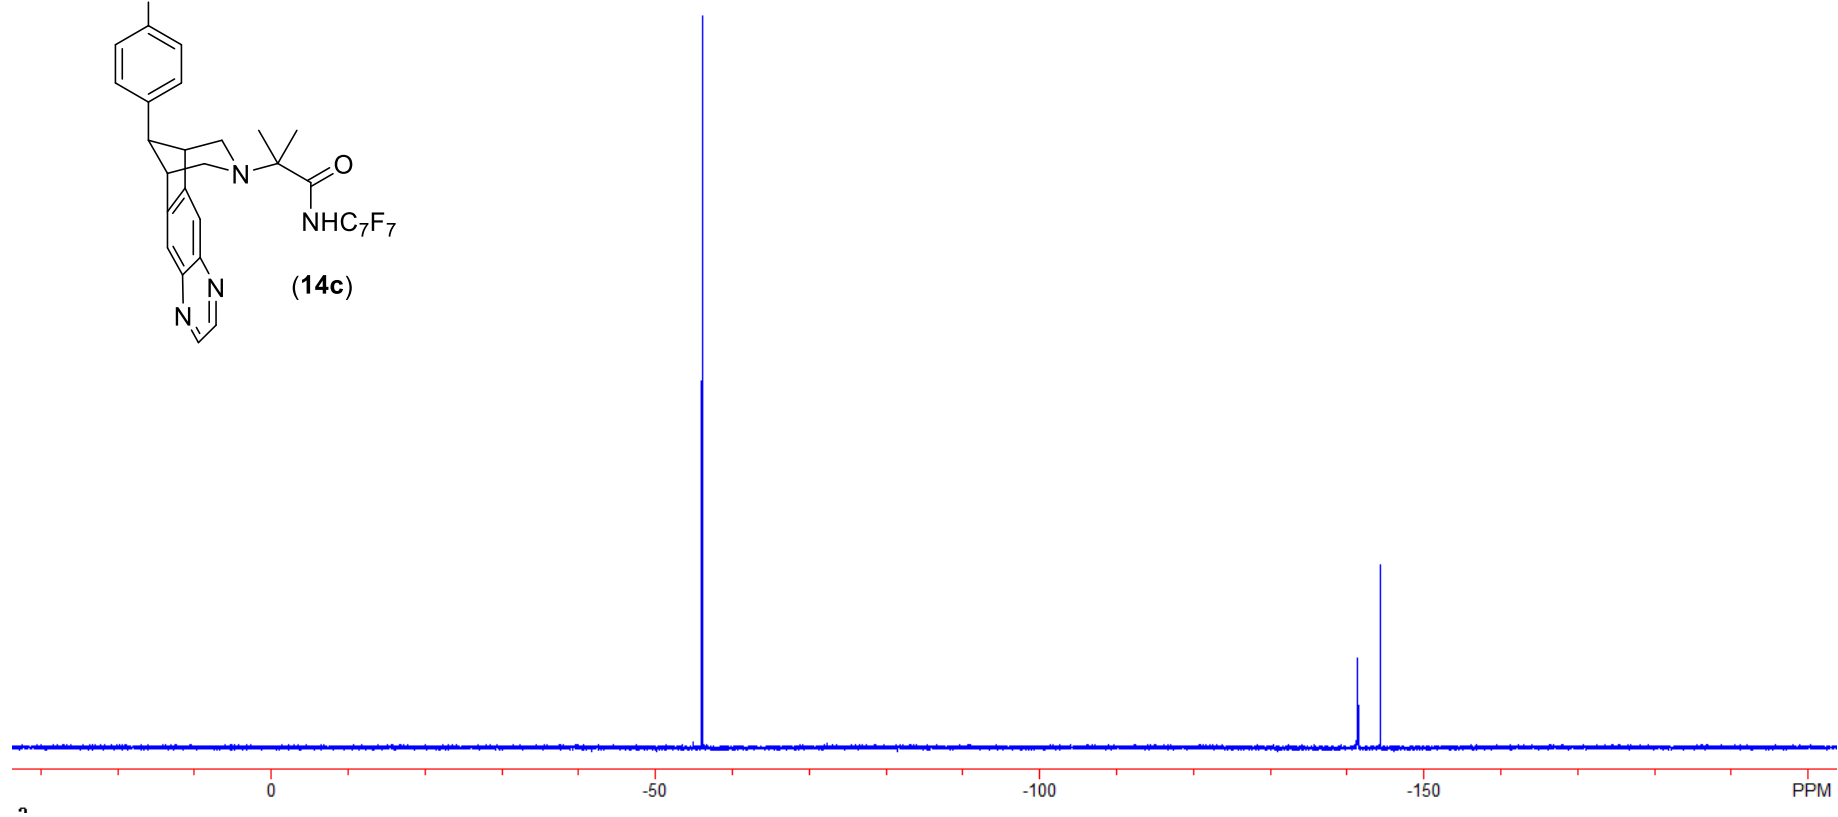

<sup>19</sup>F NMR Spectrum in CDCl<sub>3</sub>

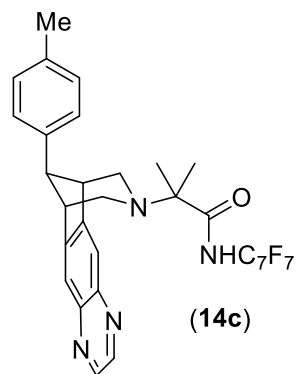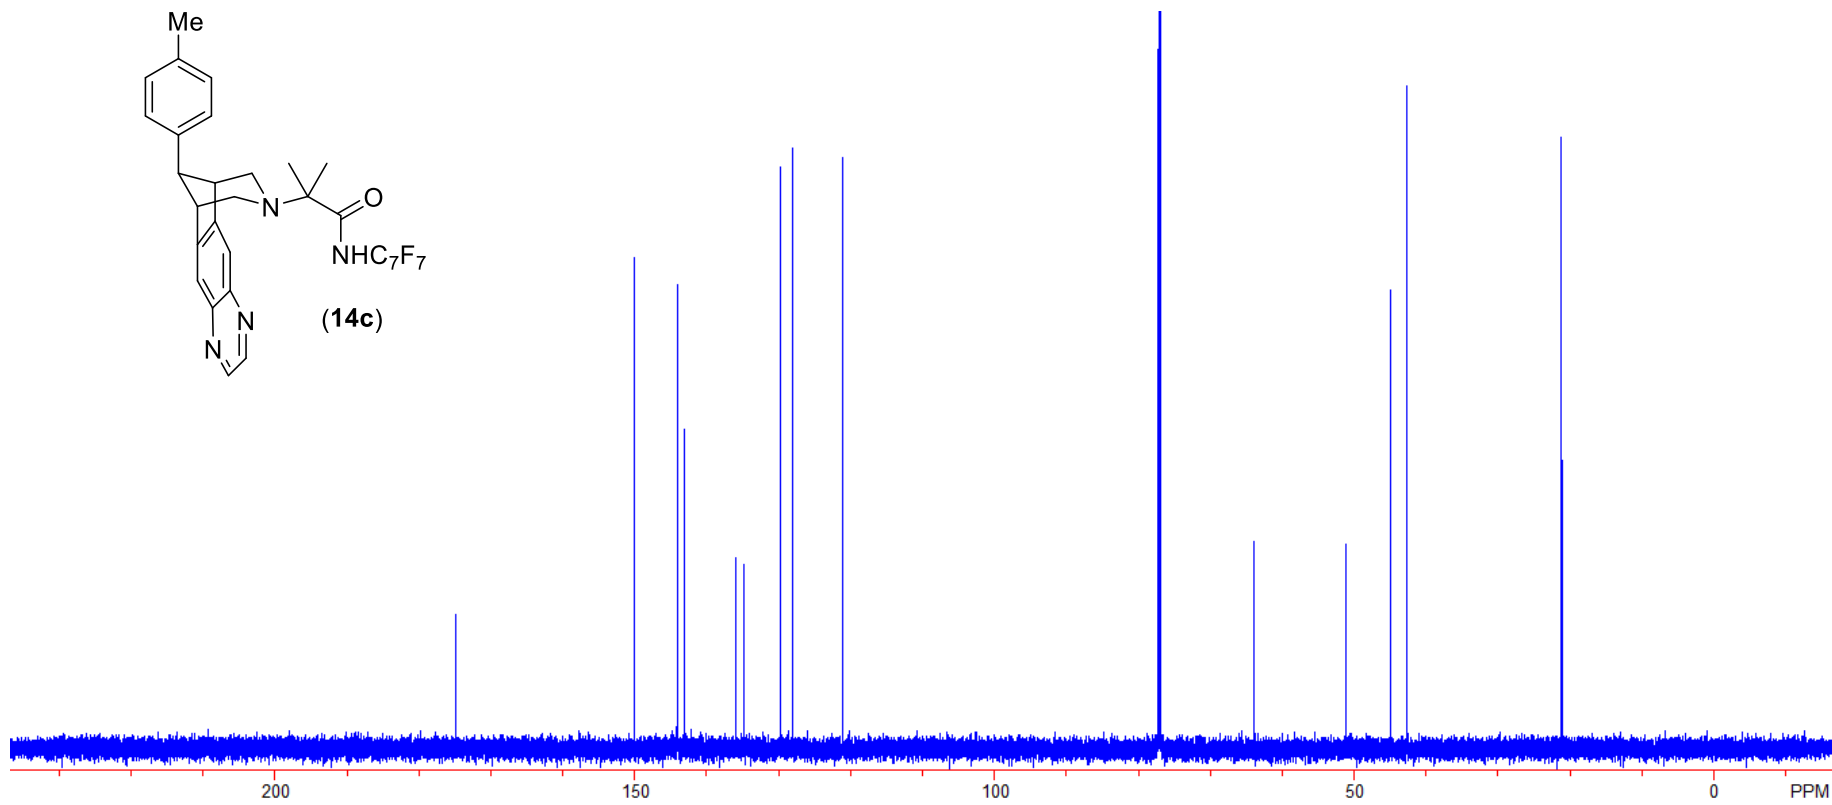

<sup>13</sup>C NMR Spectrum in CDCl<sub>3</sub>

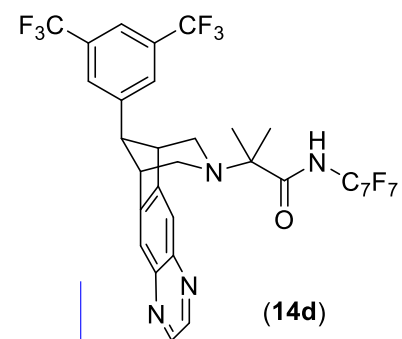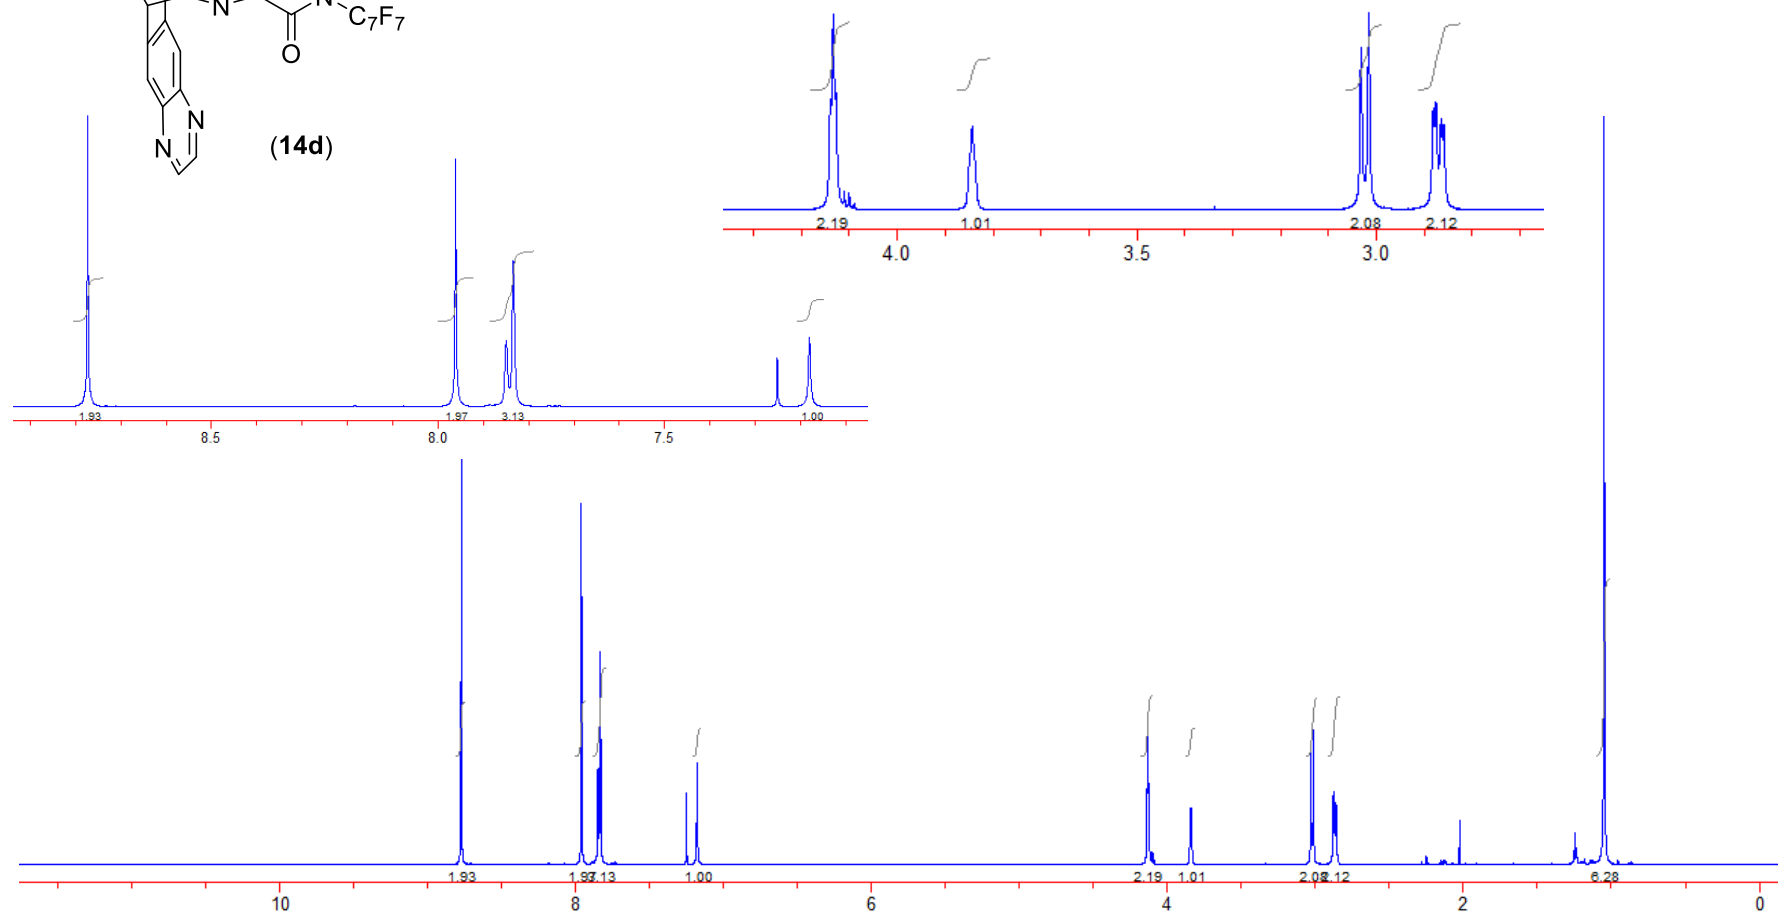

$^1\text{H}$  NMR Spectrum in  $\text{CDCl}_3$

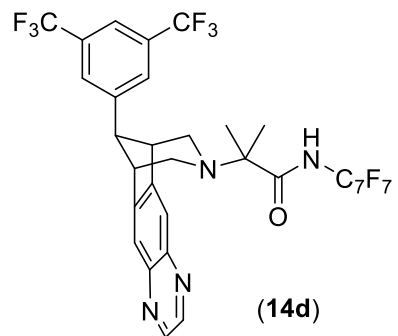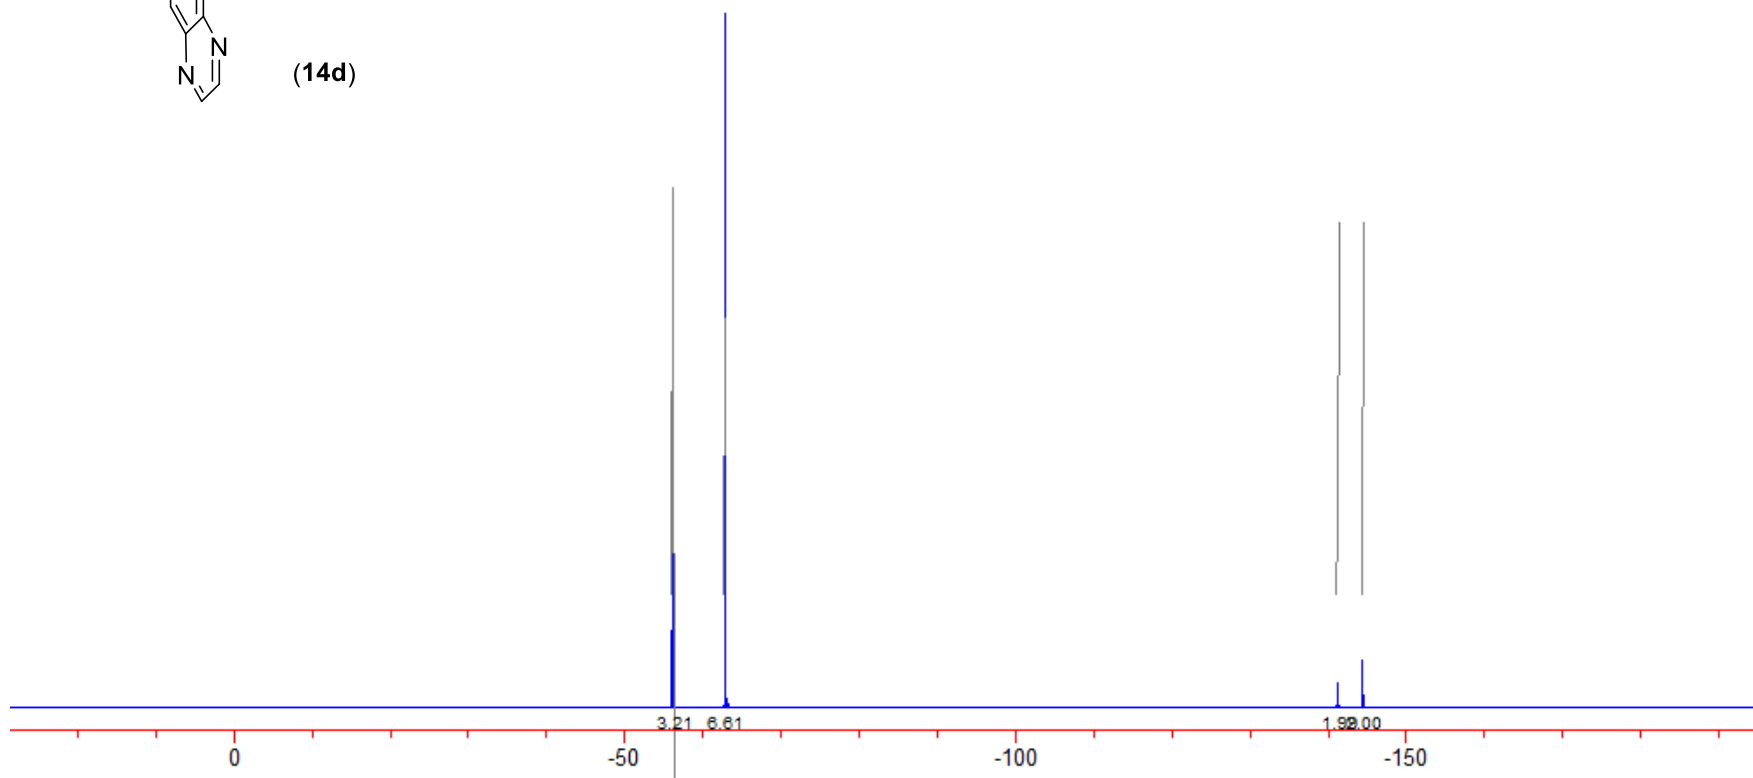

$^{19}\text{F}$  NMR Spectrum in  $\text{CDCl}_3$

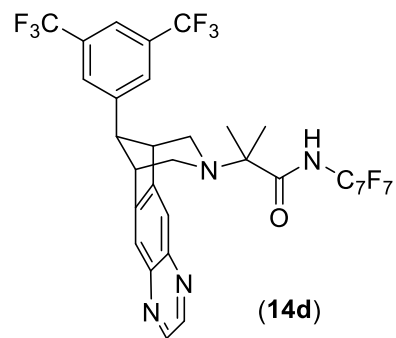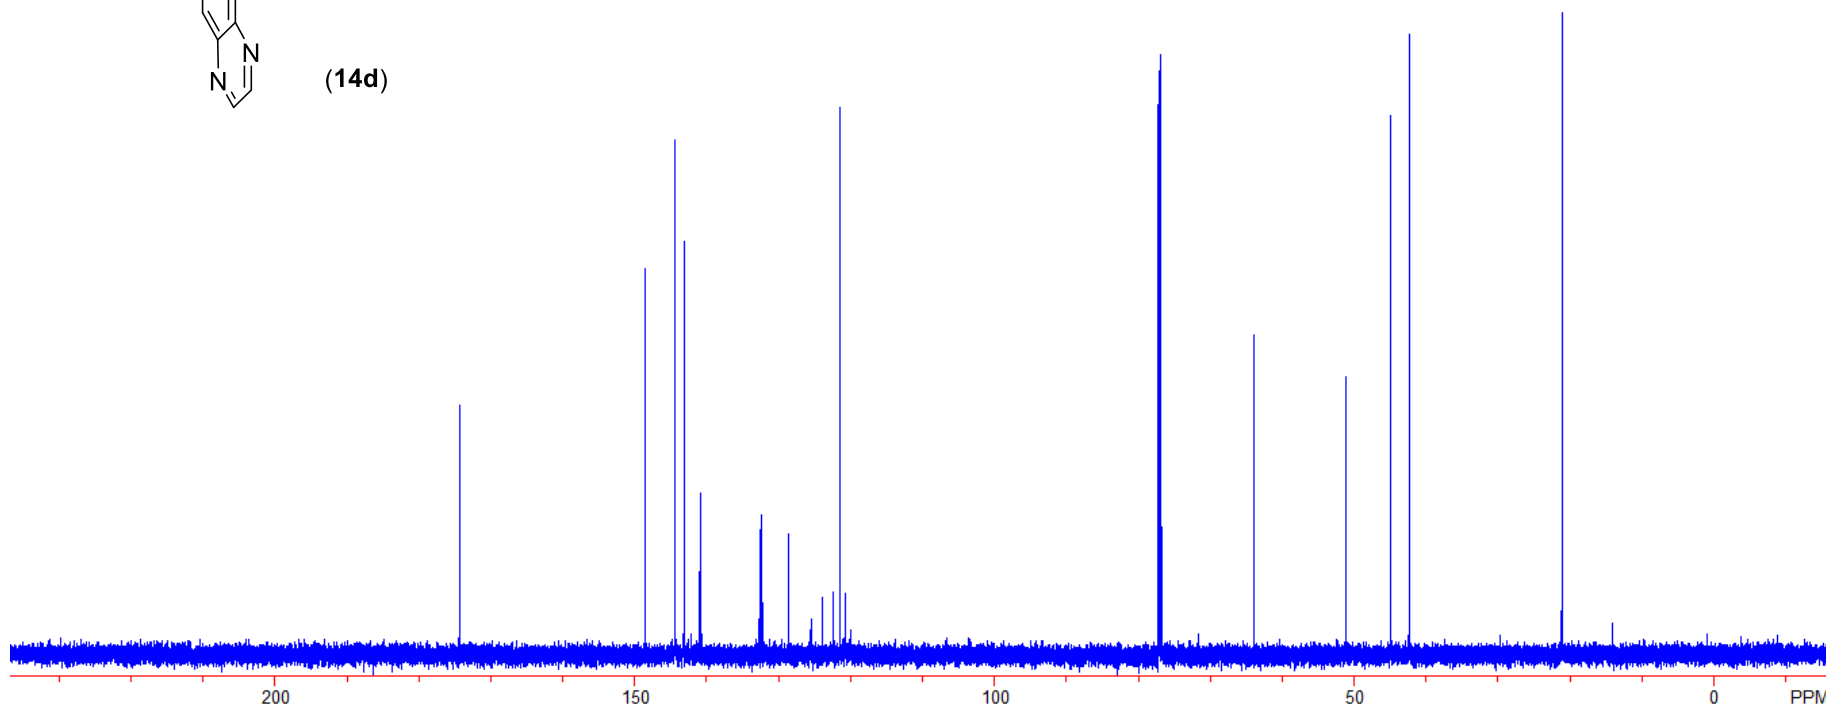

<sup>13</sup>C NMR Spectrum in CDCl<sub>3</sub>

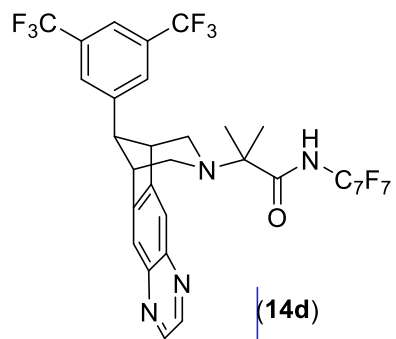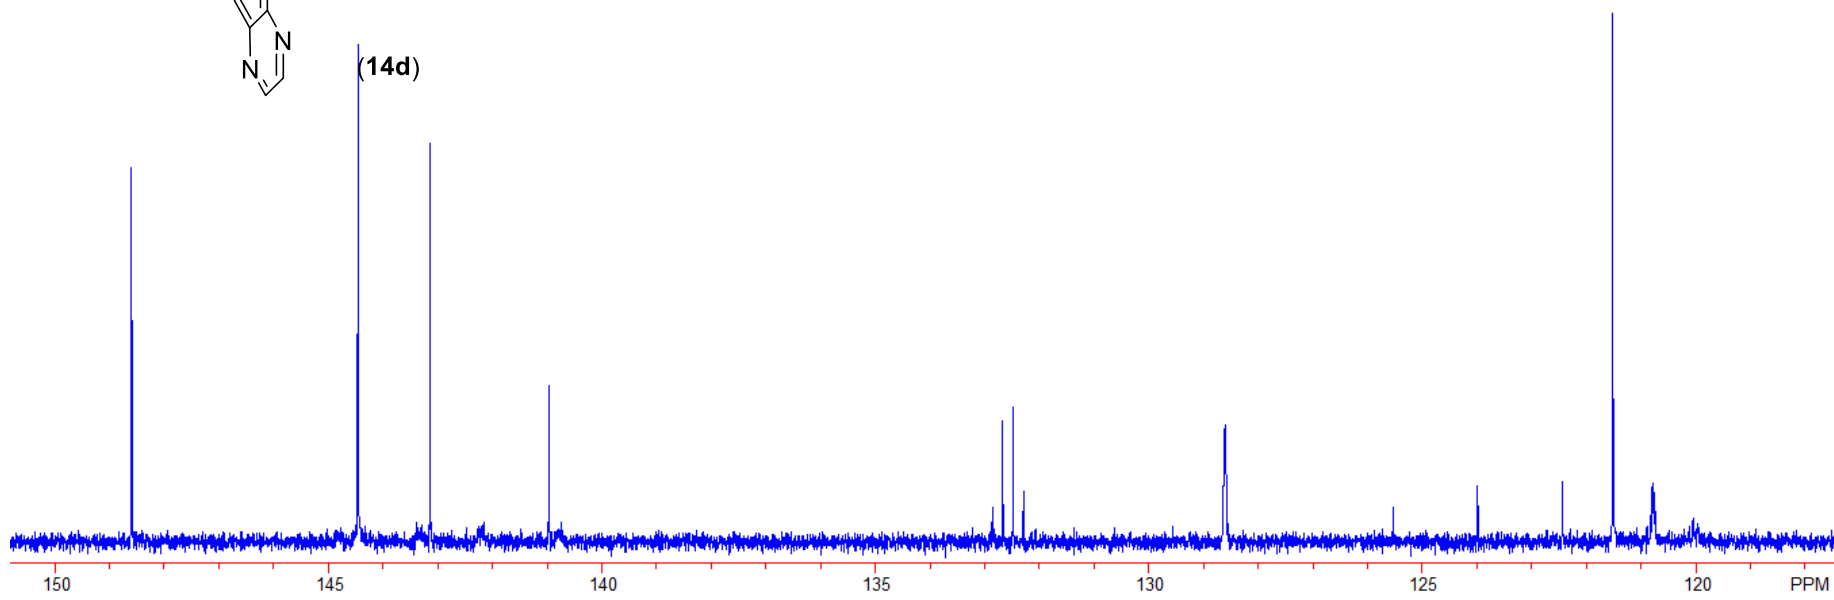

$^{13}\text{C}$  NMR Spectrum in  $\text{CDCl}_3$  (Expansion)

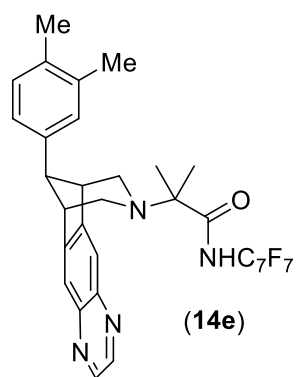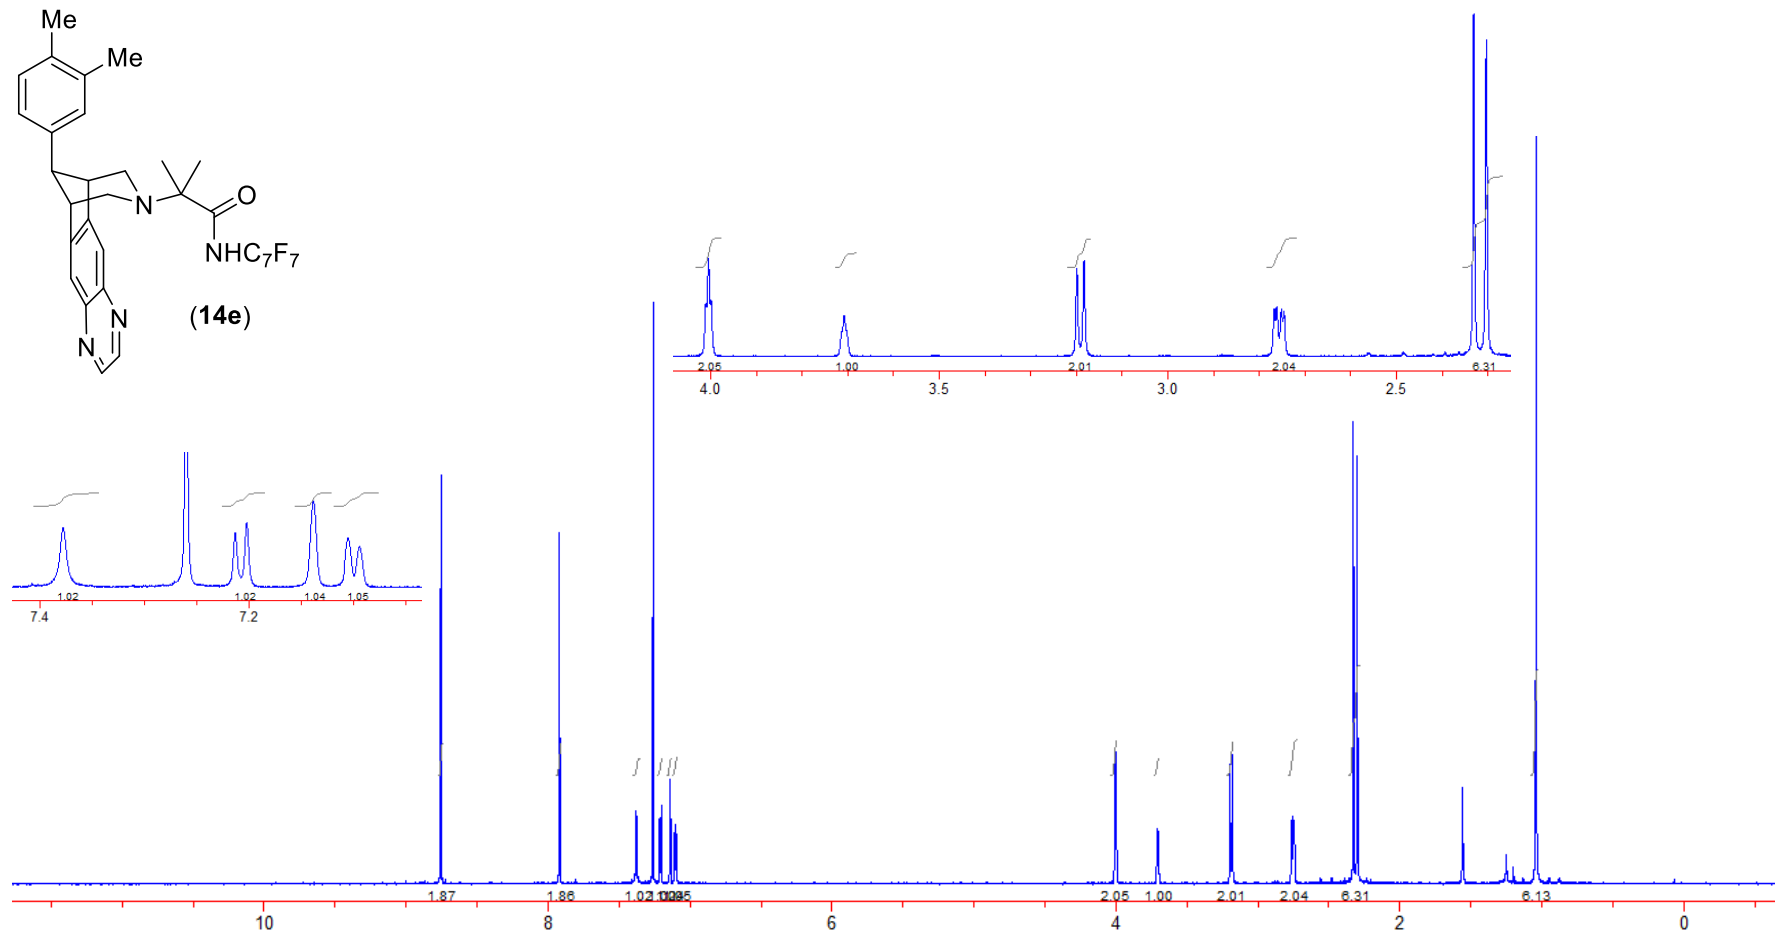

<sup>1</sup>H NMR Spectrum in CDCl<sub>3</sub>

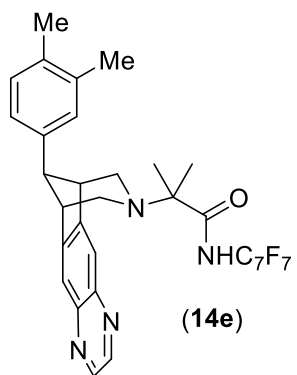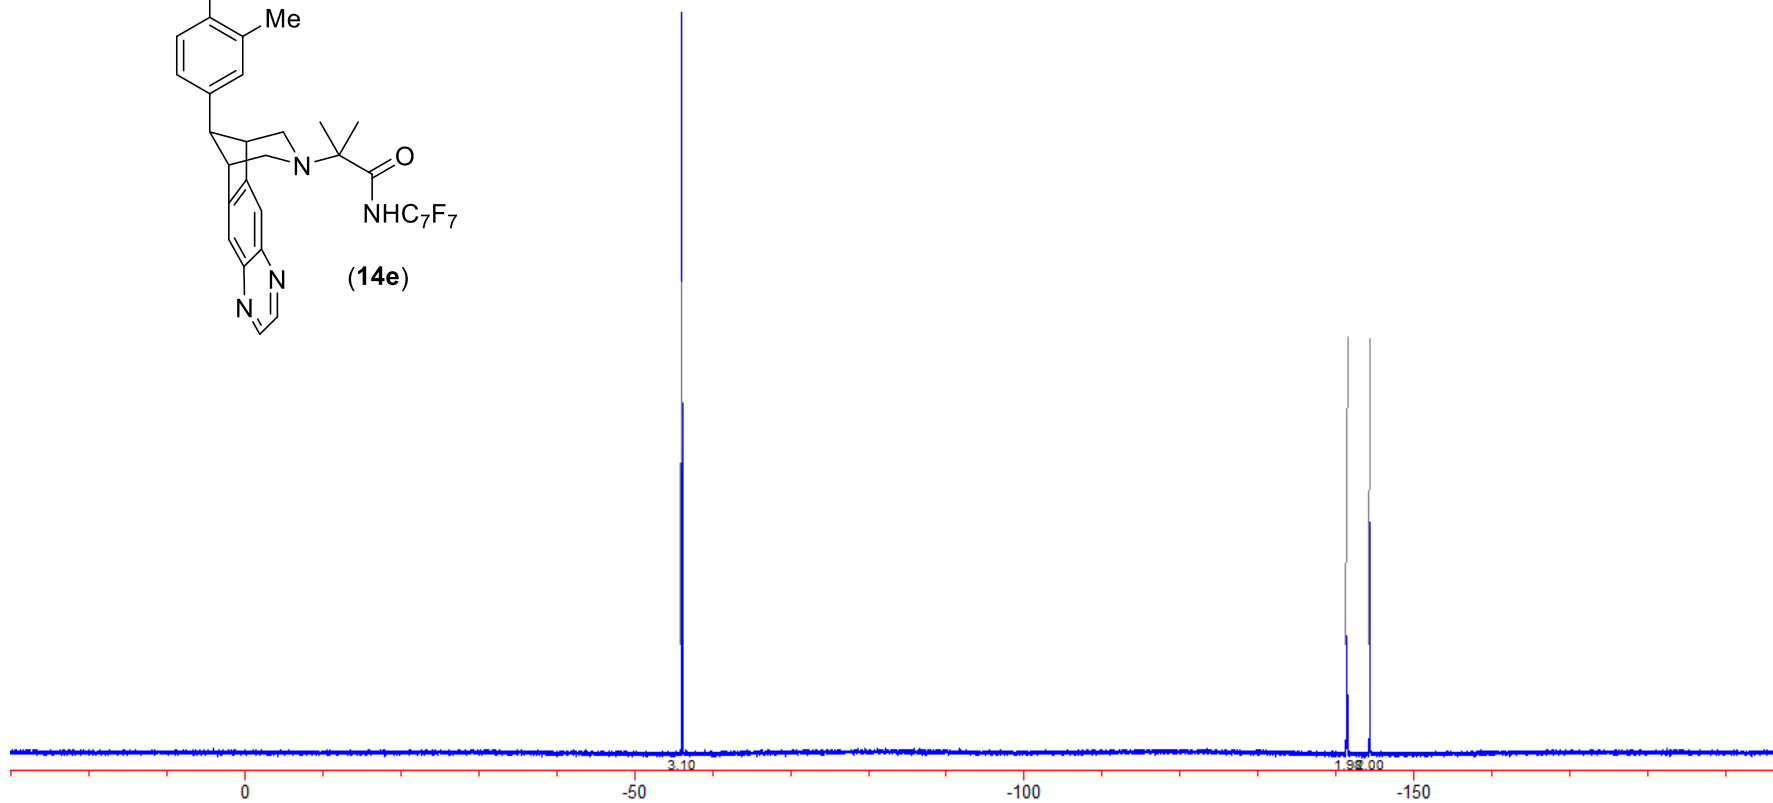

<sup>19</sup>F NMR Spectrum in CDCl<sub>3</sub>



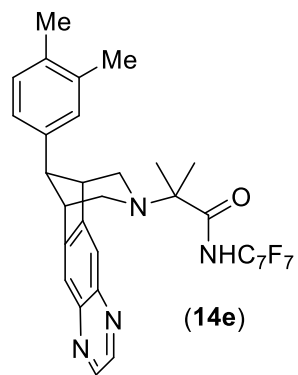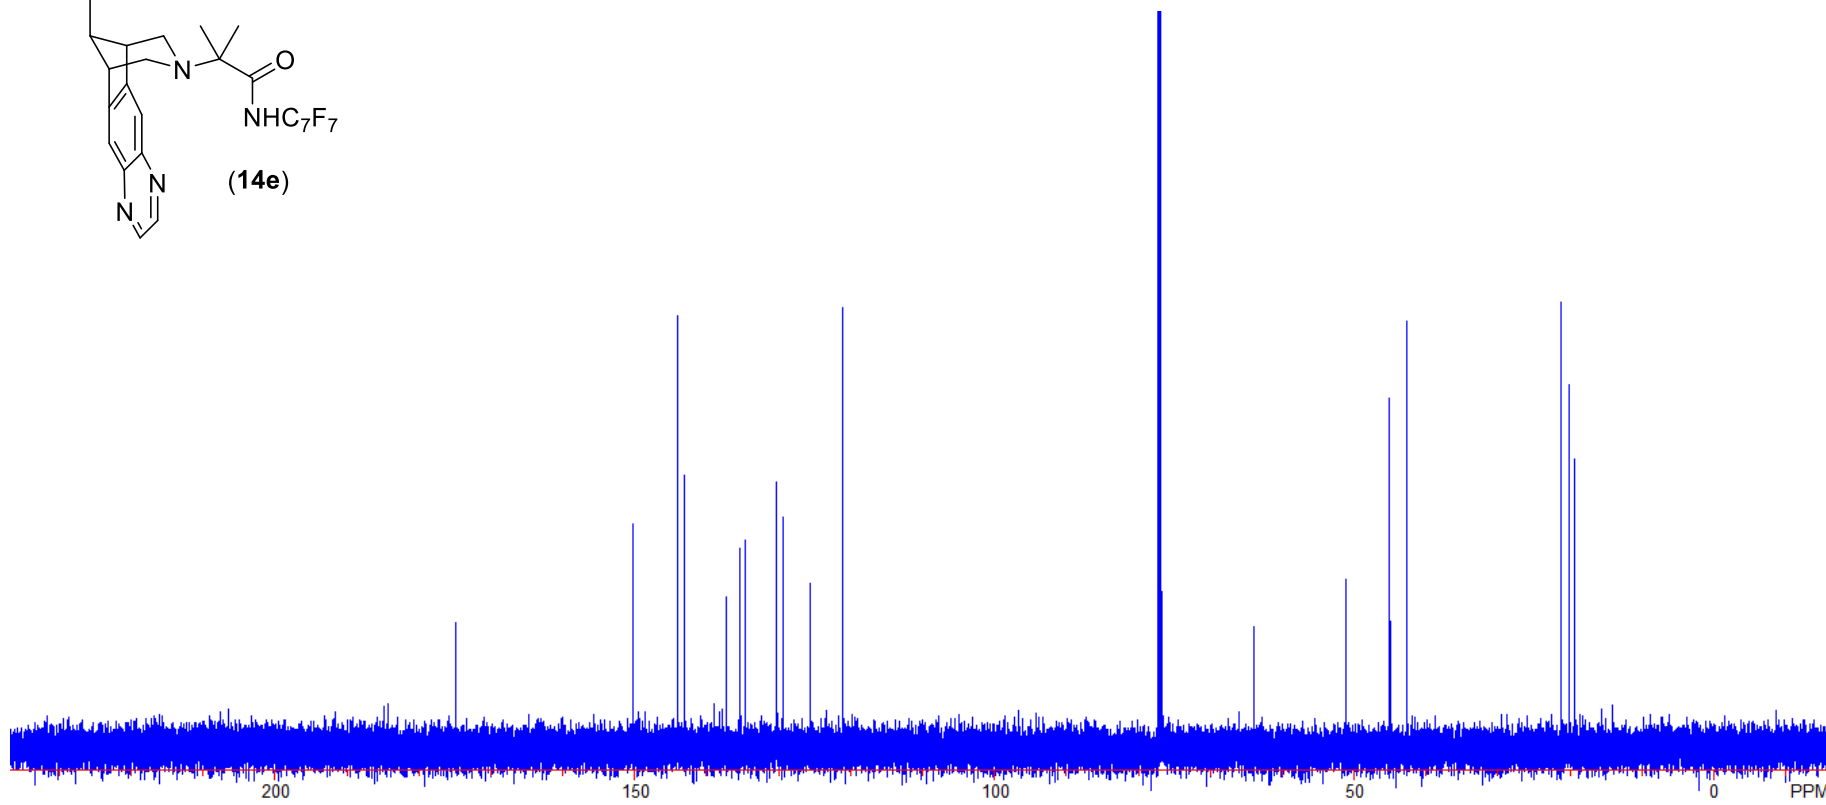

$^{13}\text{C}$  NMR Spectrum in  $\text{CDCl}_3$

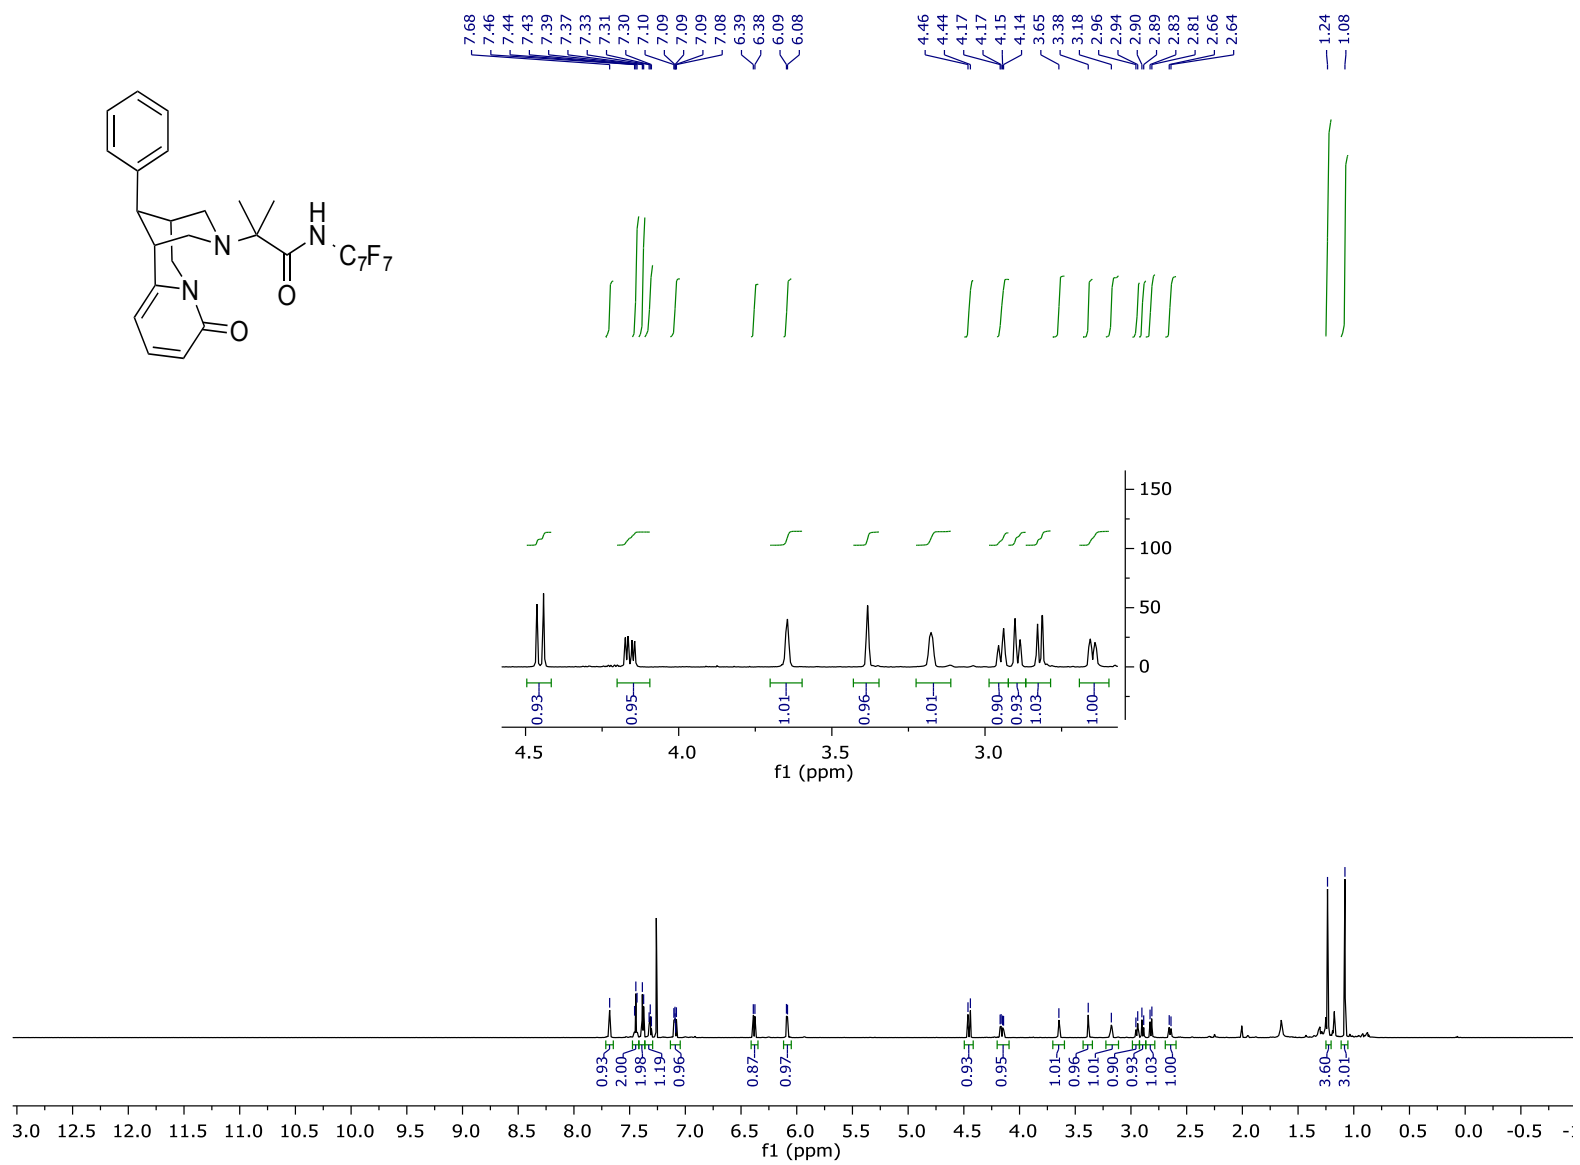

<sup>1</sup>H NMR Spectrum of **17** in CDCl<sub>3</sub>

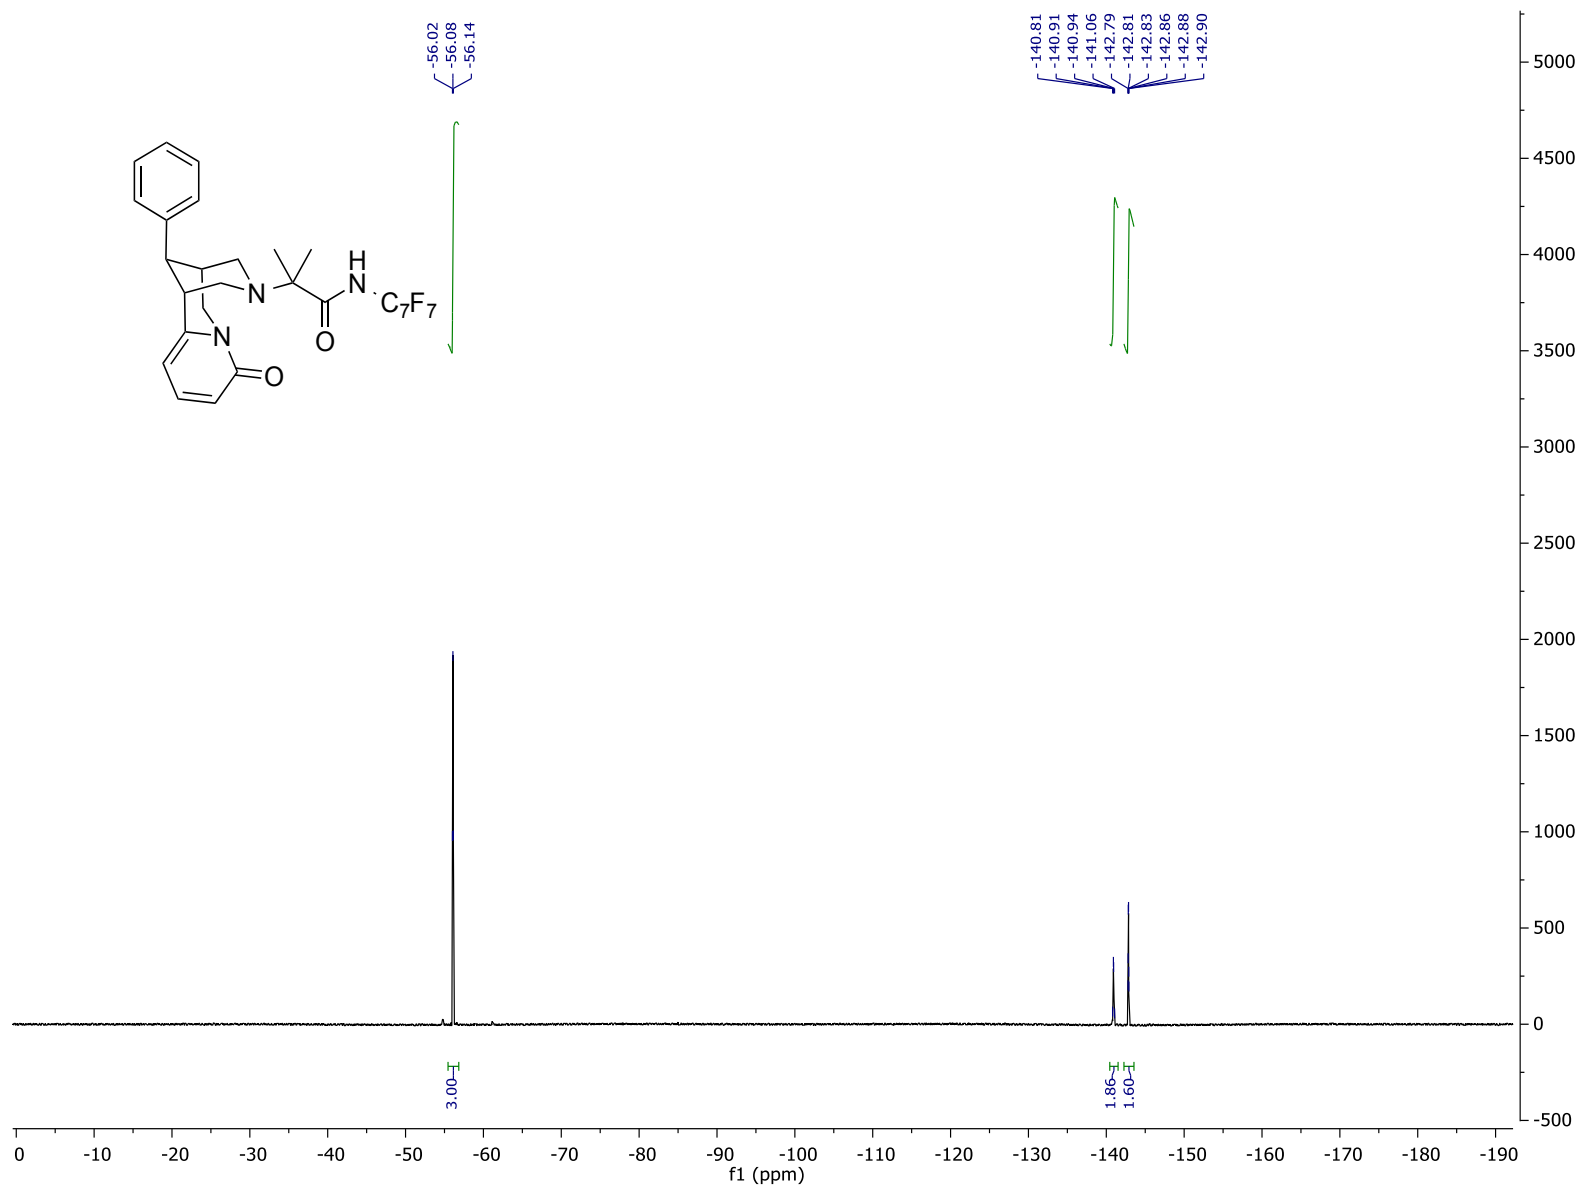

$^{19}\text{F}$  NMR Spectrum of **17** in  $\text{CDCl}_3$

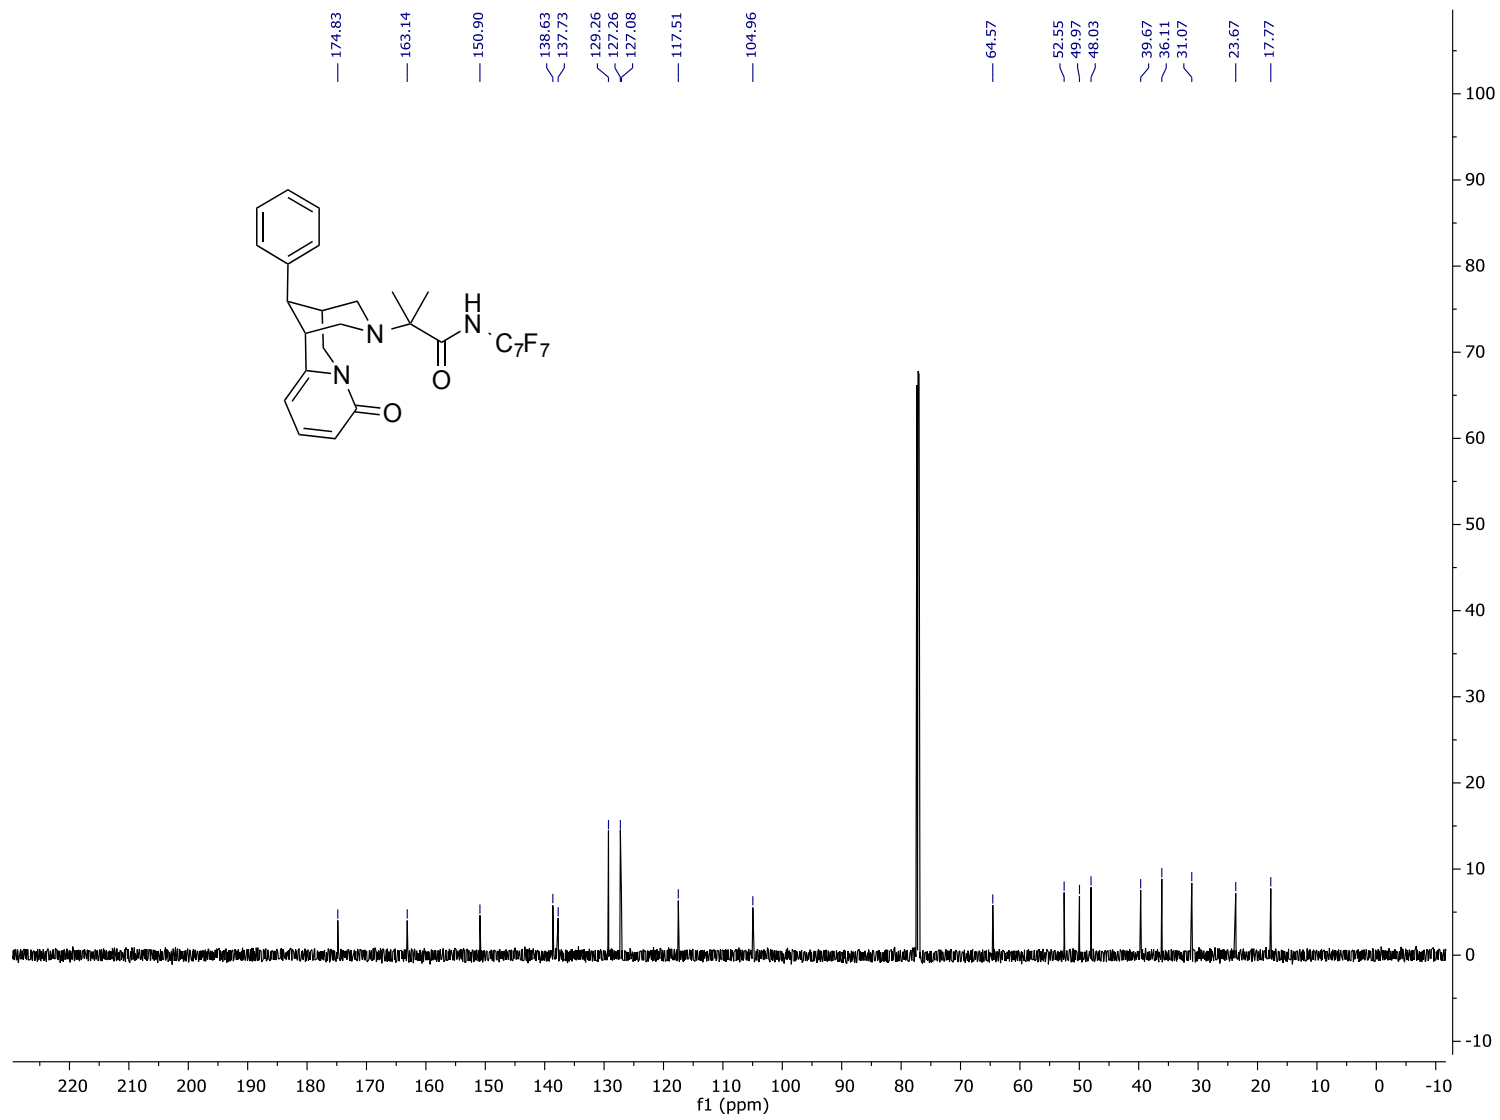

<sup>13</sup>C NMR Spectrum of **17** in CDCl<sub>3</sub>

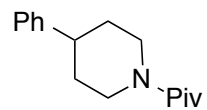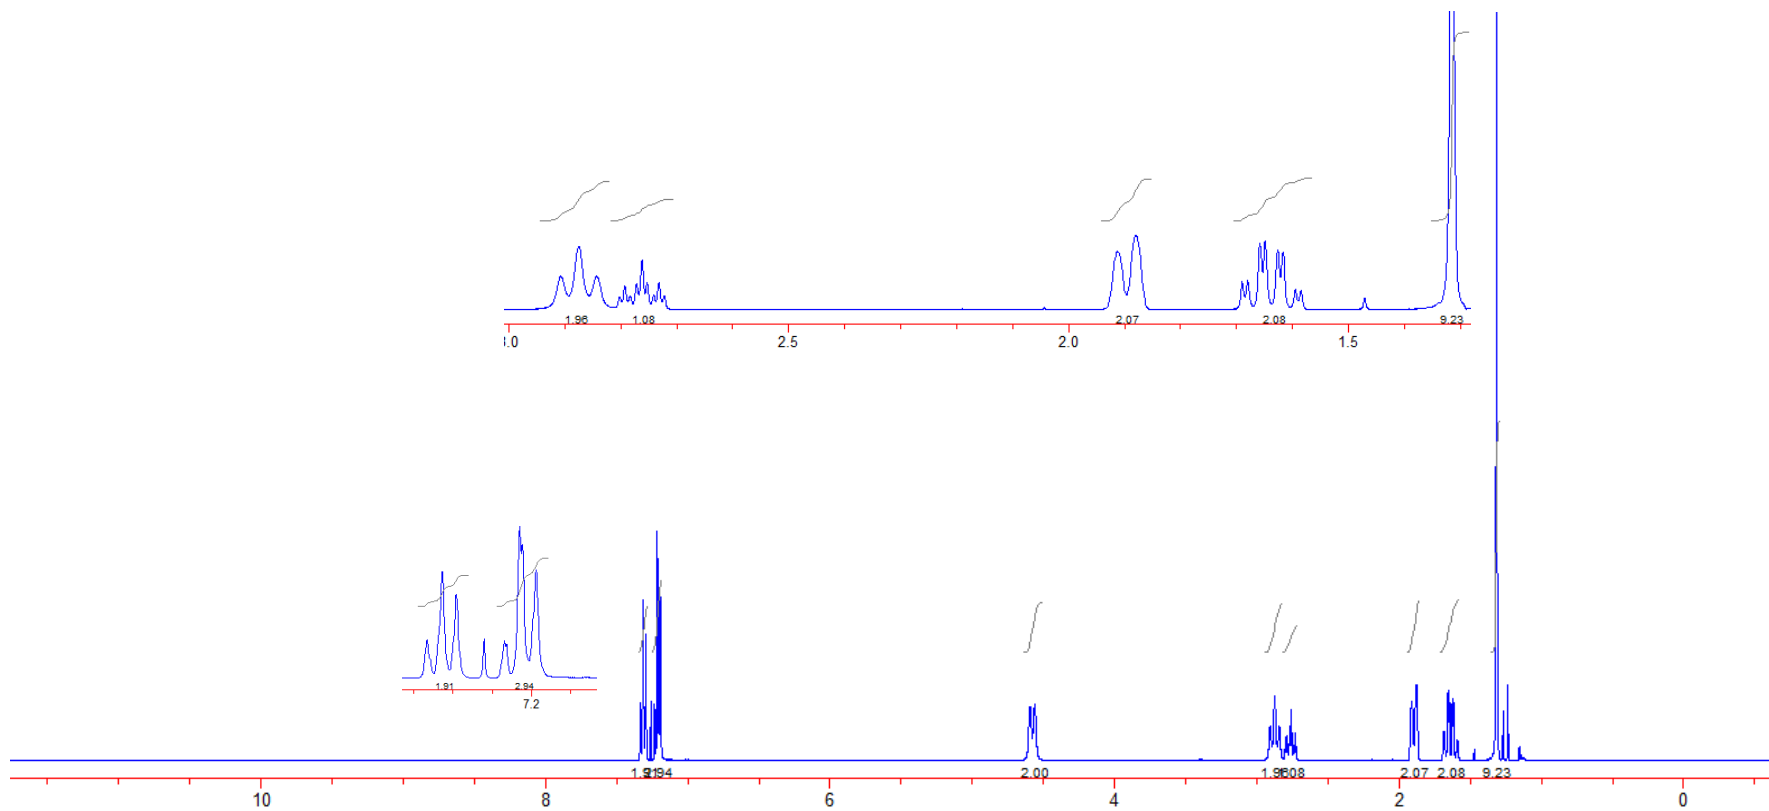

<sup>1</sup>H NMR Spectrum of **S16** in CDCl<sub>3</sub>

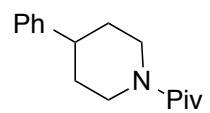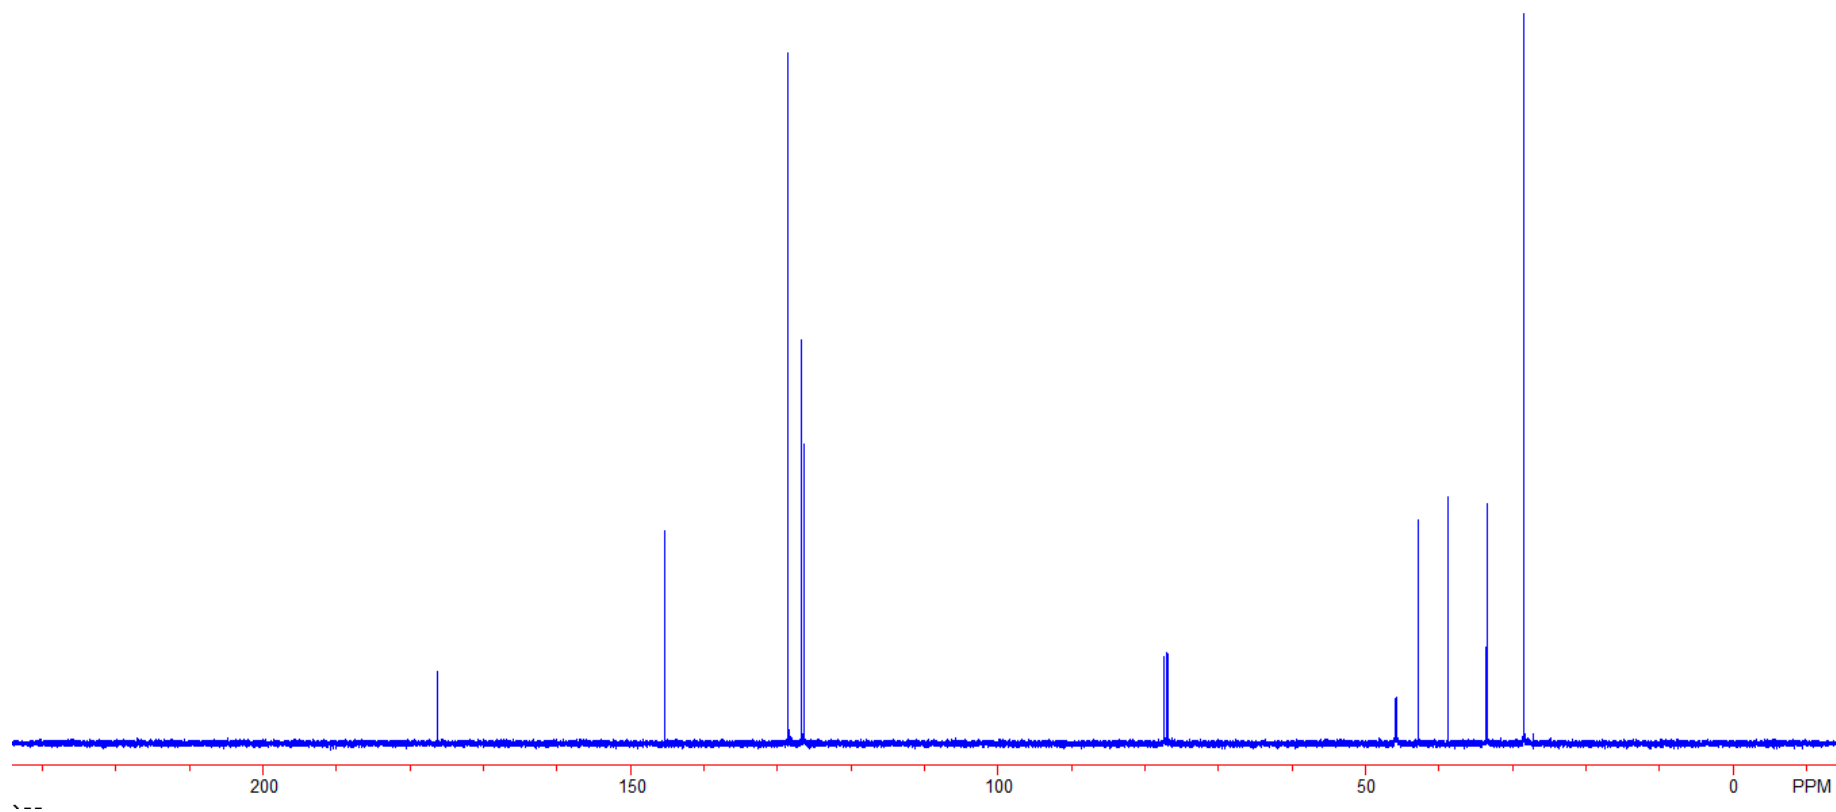

$^{13}\text{C}$  NMR Spectrum of **S16** in  $\text{CDCl}_3$

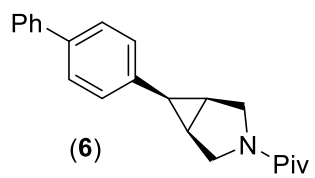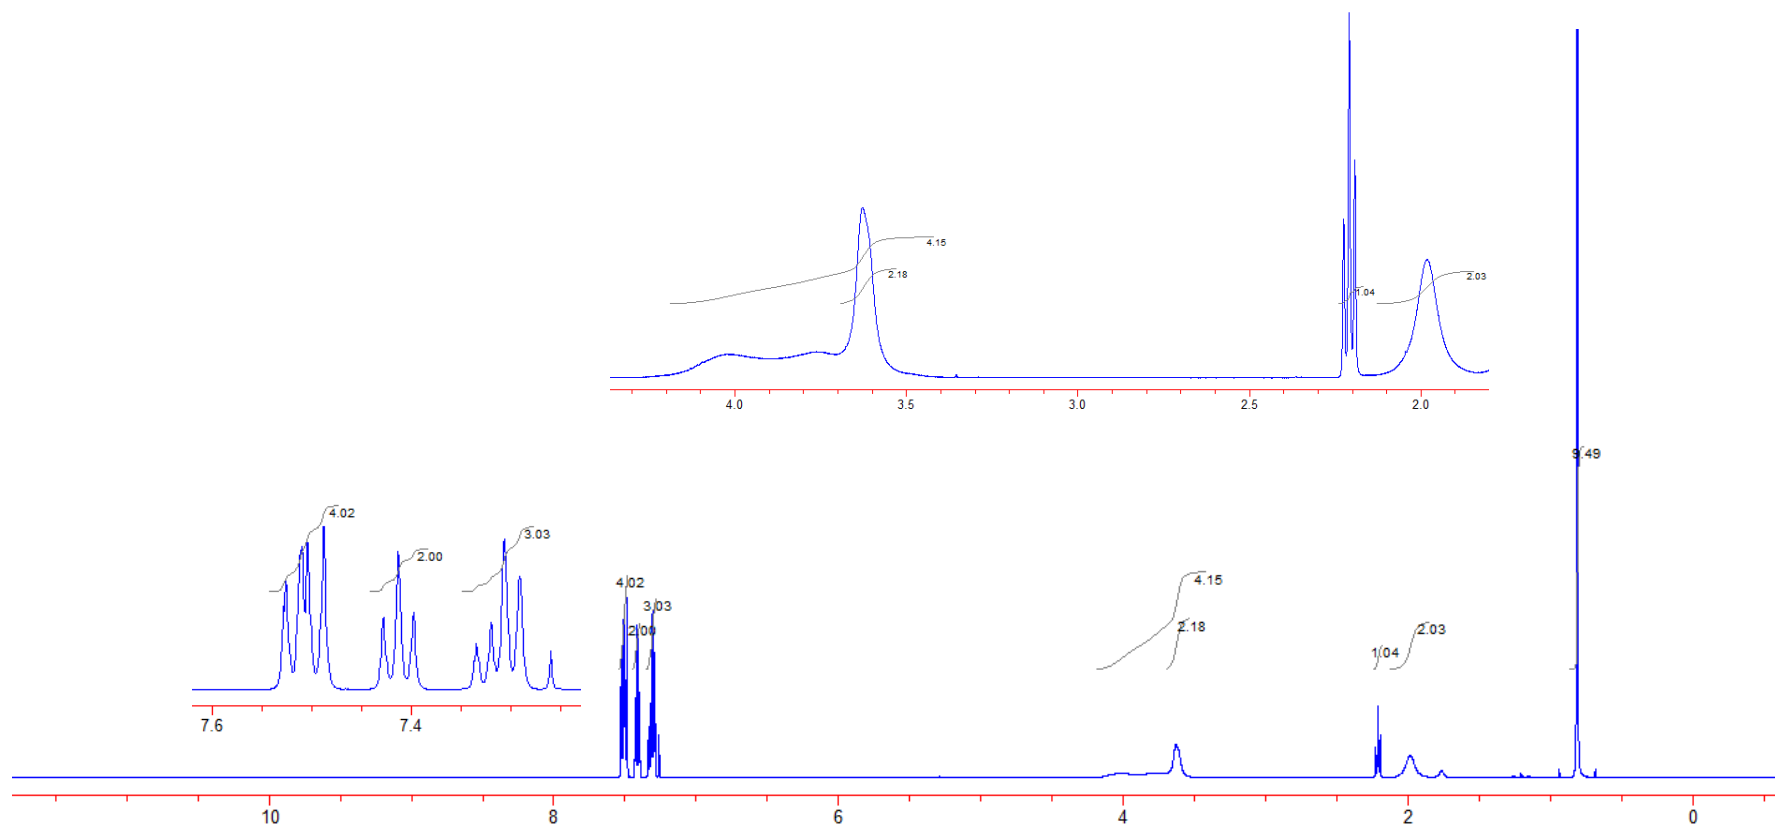

$^1\text{H}$  NMR Spectrum in  $\text{CDCl}_3$  at  $25\text{ }^\circ\text{C}$

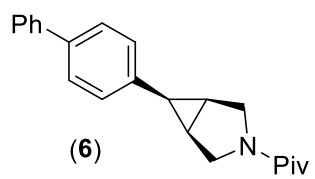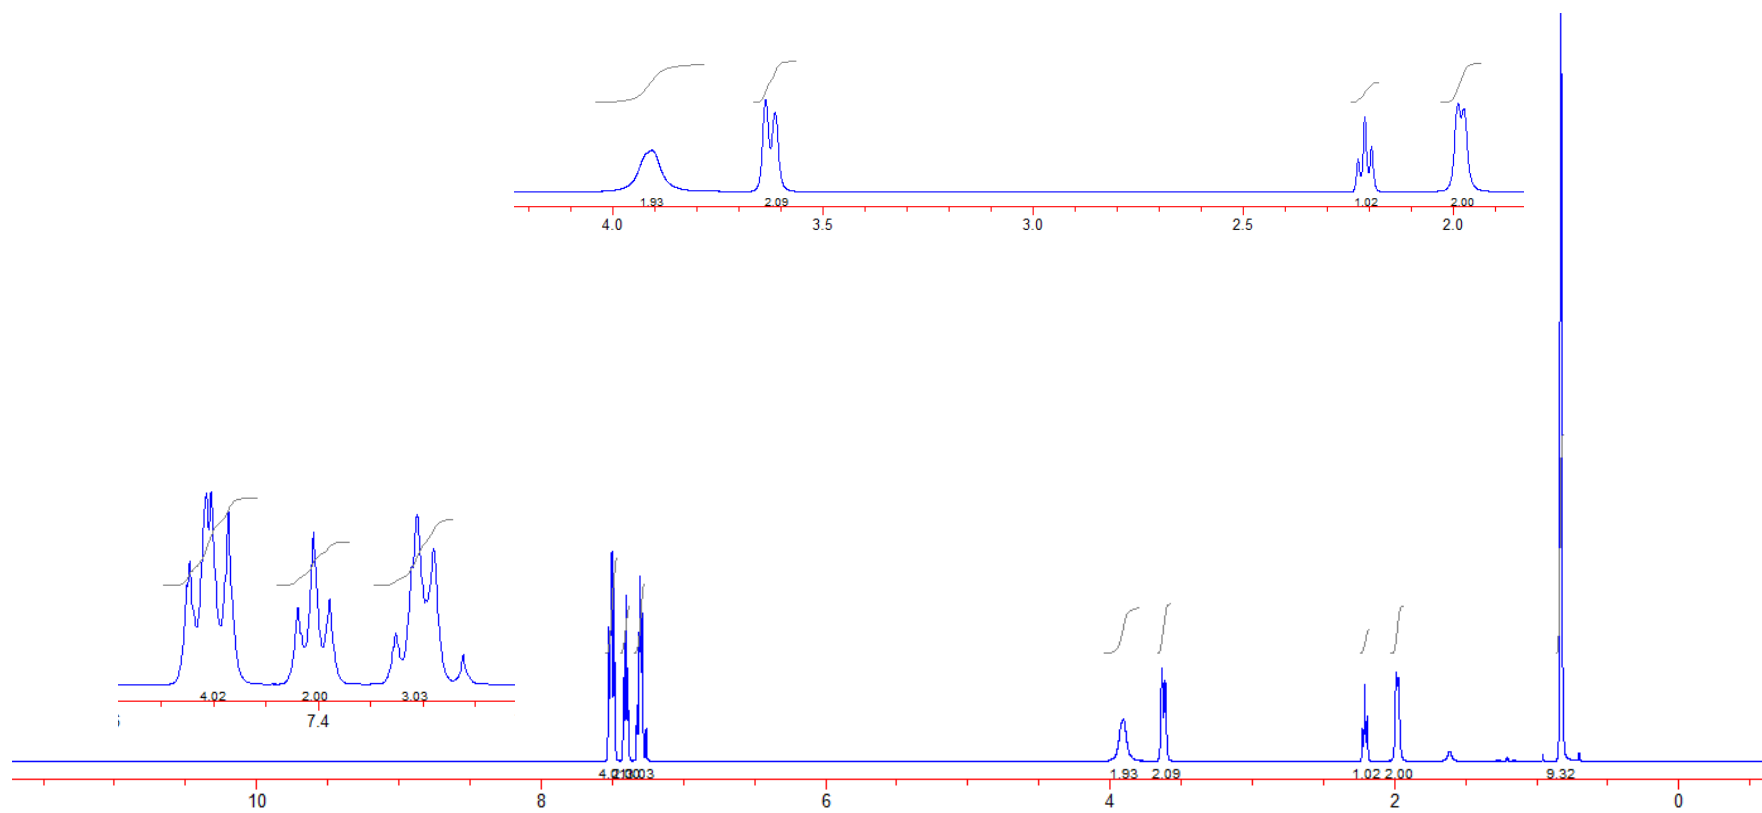

$^1\text{H}$  NMR Spectrum in  $\text{CDCl}_3$  at  $52\text{ }^\circ\text{C}$



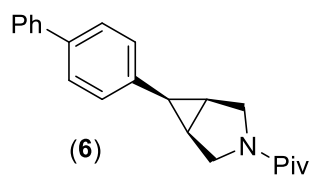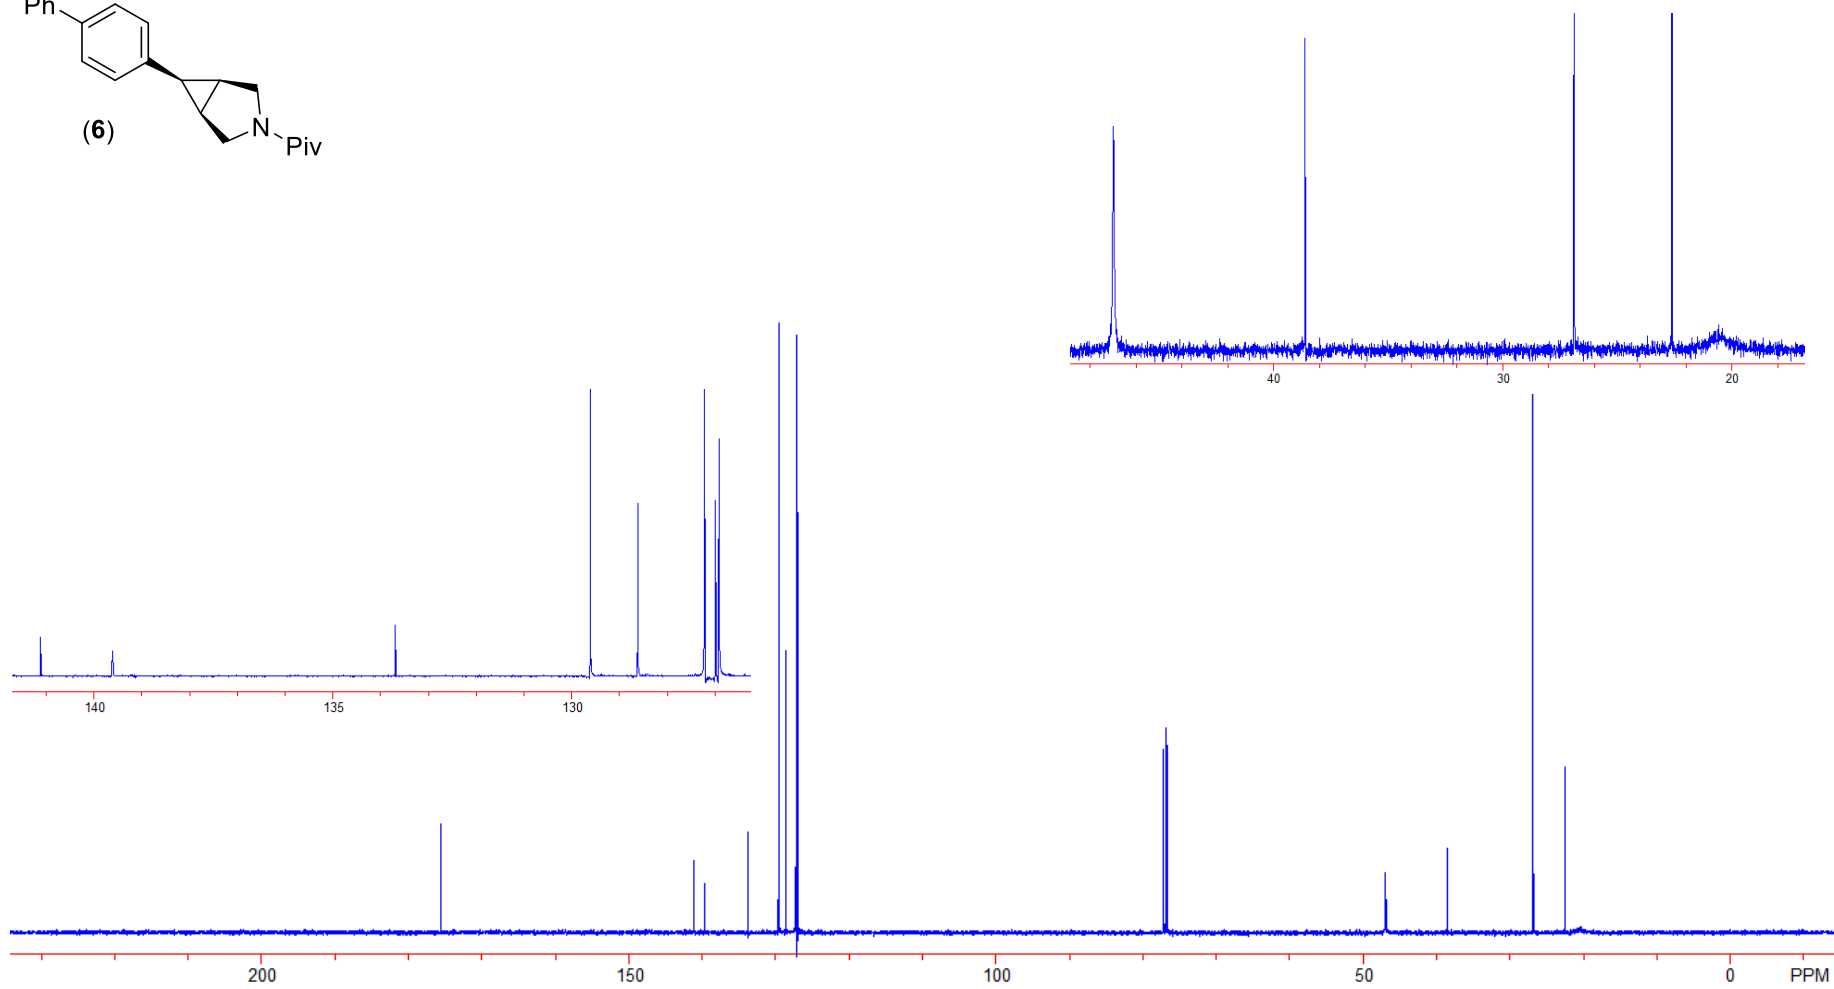

$^{13}\text{C}$  NMR Spectrum in  $\text{CDCl}_3$  at  $52\text{ }^\circ\text{C}$

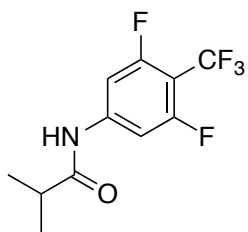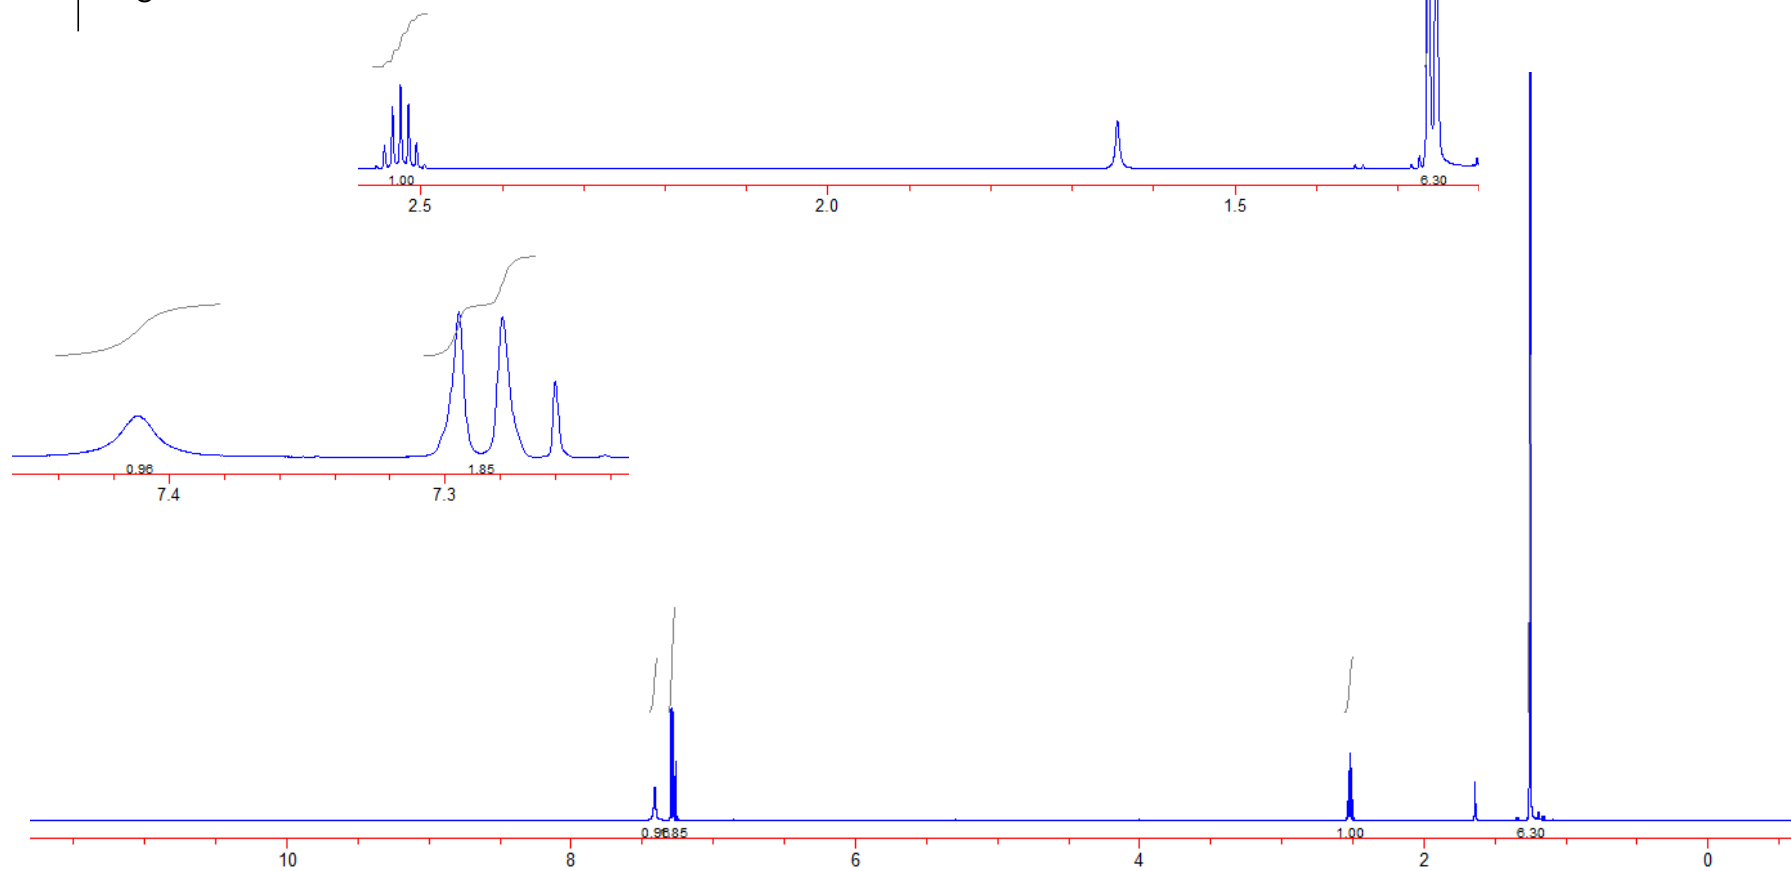

<sup>1</sup>H NMR Spectrum of S17 in CDCl<sub>3</sub>

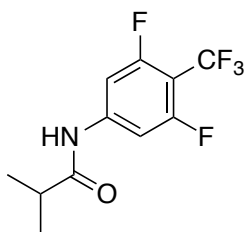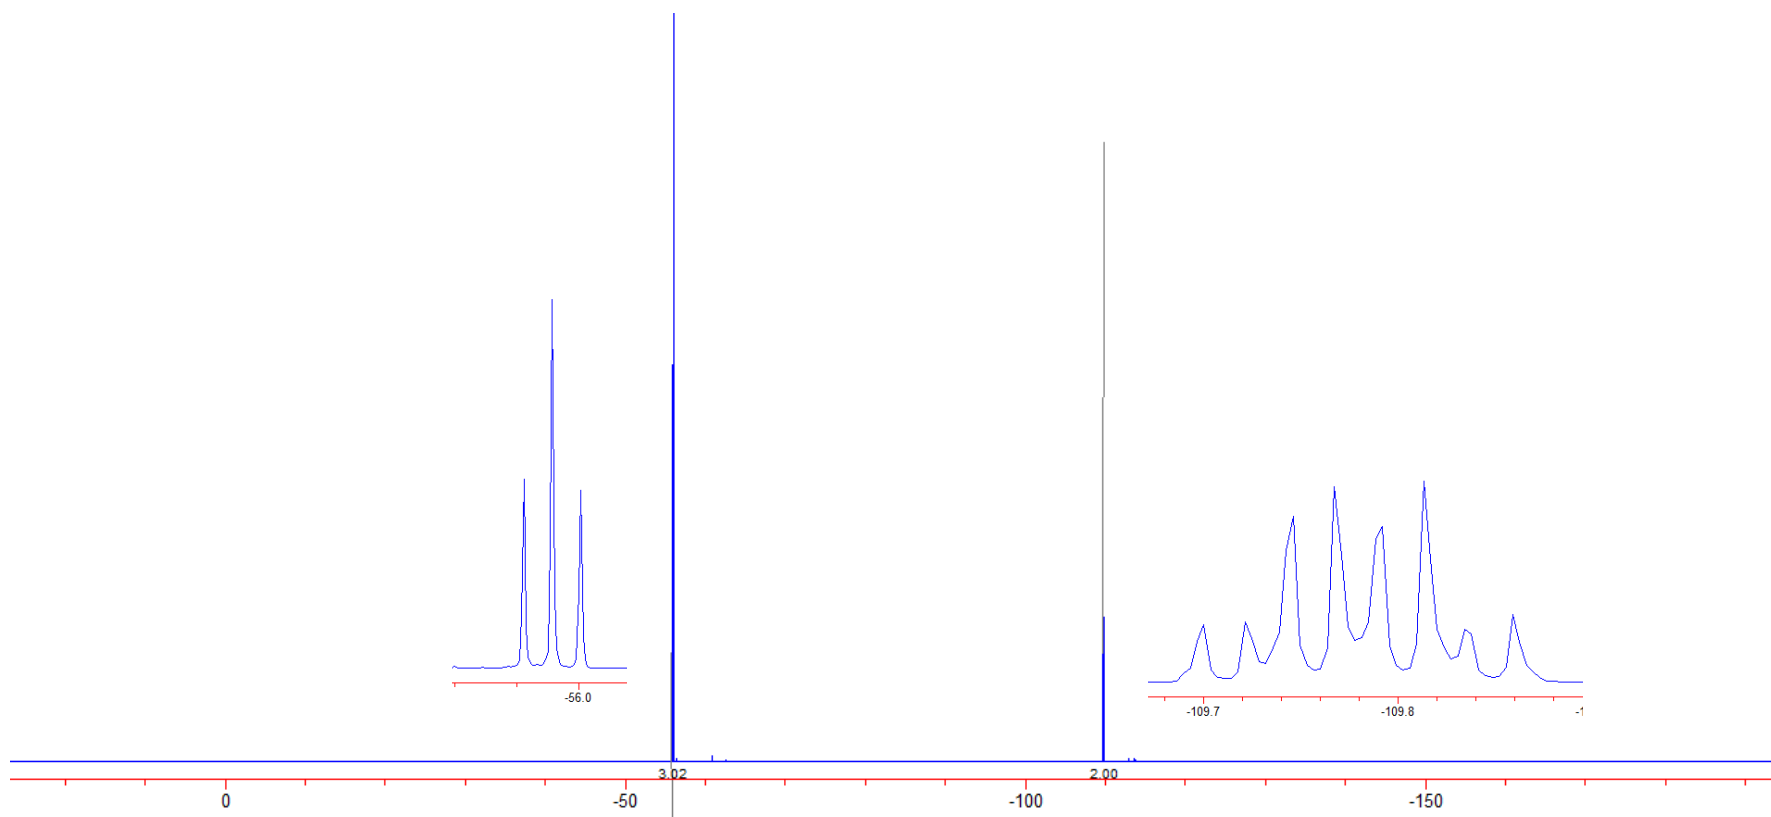

$^{19}\text{F}$  NMR Spectrum of S17 in  $\text{CDCl}_3$

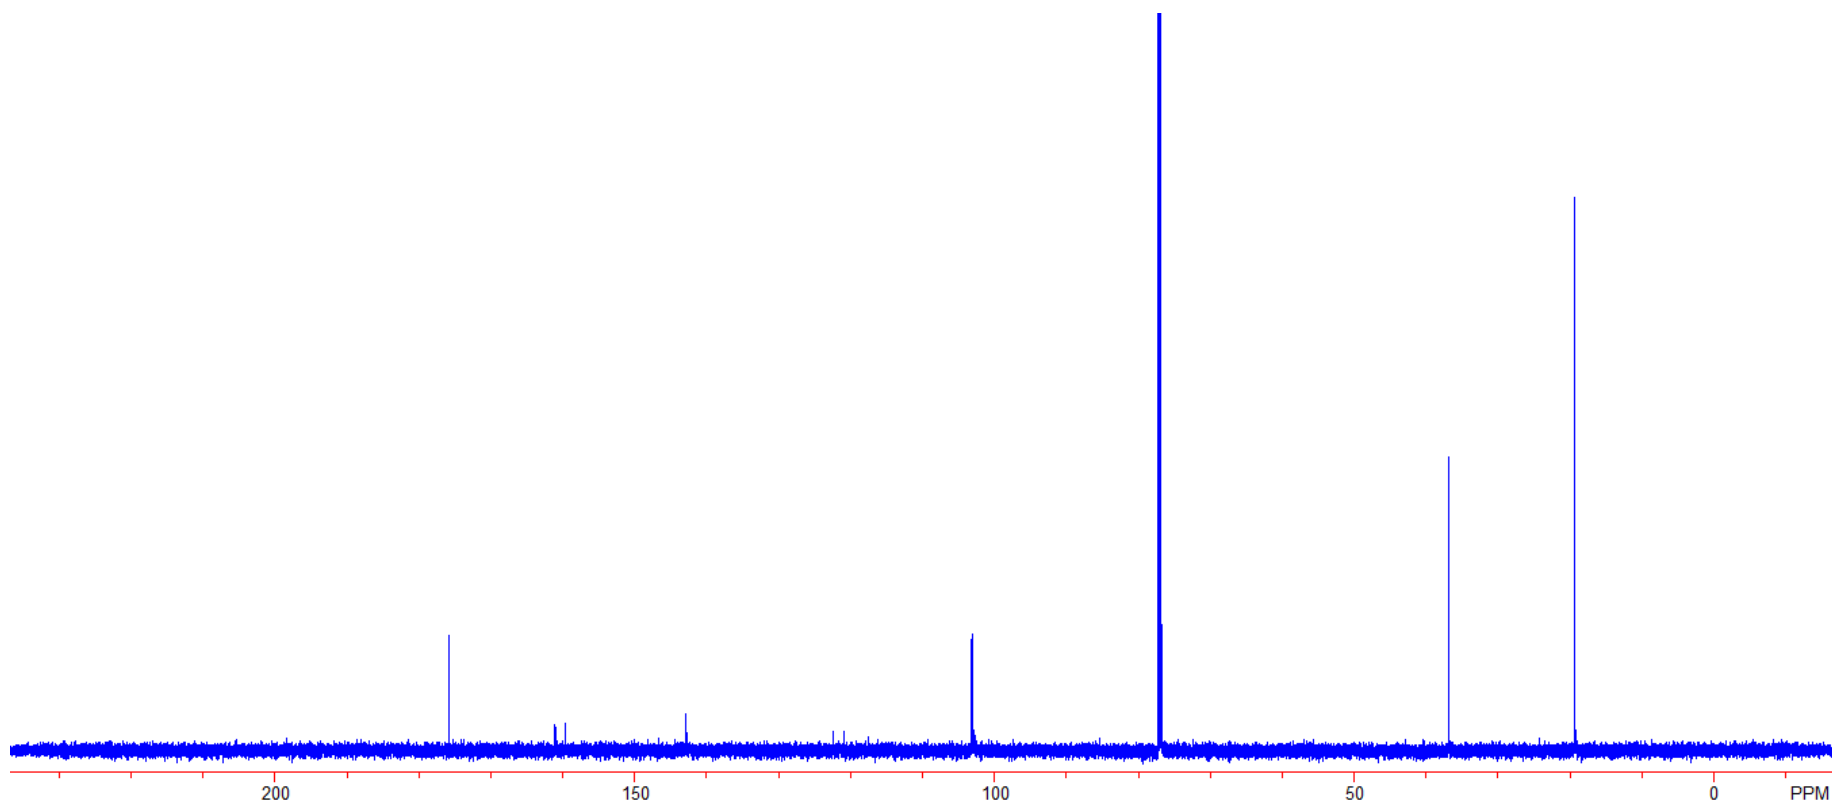

$^{13}\text{C}$  NMR Spectrum of S17 in  $\text{CDCl}_3$
